# Supplementary material for: Diminishing benefits of urban living for children and adolescents’ growth and development
Source: PubMed Central journal article supplement (PMC10060164; doi:10.1038/s41586-023-05772-8), 2023-03-29
Supplement: 41586_2023_5772_MOESM1_ESM.pdf [file 41586_2023_5772_MOESM1_ESM.pdf]

**Supplementary information**

---

**Diminishing benefits of urban living for children and adolescents' growth and development**

---

In the format provided by the authors and unedited

**Supplementary Table 1.** List of analysis regions and super-regions, and countries in each region.



| Super-region                               | Region                                                                                                                                                                                                                                                           |
|--------------------------------------------|------------------------------------------------------------------------------------------------------------------------------------------------------------------------------------------------------------------------------------------------------------------|
| Central and eastern Europe                 | <b>Central Europe:</b> Albania, Bosnia and Herzegovina, Bulgaria, Croatia, Czechia, Hungary, Montenegro, North Macedonia, Poland, Romania, Serbia, Slovakia, Slovenia                                                                                            |
|                                            | <b>Eastern Europe:</b> Belarus, Estonia, Latvia, Lithuania, Moldova, Russian Federation, Ukraine                                                                                                                                                                 |
| Central Asia, Middle East and north Africa | <b>Central Asia:</b> Armenia, Azerbaijan, Georgia, Kazakhstan, Kyrgyzstan, Mongolia, Tajikistan, Turkmenistan, Uzbekistan                                                                                                                                        |
|                                            | <b>Middle East and north Africa:</b> Algeria, Bahrain, Egypt, Iran, Iraq, Jordan, Kuwait, Lebanon, Libya, Morocco, Oman, Qatar, Saudi Arabia, State of Palestine, Syrian Arab Republic, Tunisia, Turkey, United Arab Emirates, Yemen                             |
| East and southeast Asia                    | <b>East Asia:</b> China, North Korea, Taiwan                                                                                                                                                                                                                     |
|                                            | <b>Southeast Asia:</b> Brunei Darussalam, Cambodia, Indonesia, Lao PDR, Malaysia, Maldives, Myanmar, Philippines, Thailand, Timor-Leste, Viet Nam                                                                                                                |
| High-income Asia Pacific                   | <b>High-income Asia Pacific:</b> Japan, Singapore, South Korea                                                                                                                                                                                                   |
| High-income western                        | <b>High-income English-speaking countries*:</b> Australia, Canada, Ireland, New Zealand, United Kingdom, United States of America                                                                                                                                |
|                                            | <b>Northwestern Europe:</b> Austria, Belgium, Denmark, Finland, Germany, Greenland, Iceland, Luxembourg, Netherlands, Norway, Sweden, Switzerland                                                                                                                |
|                                            | <b>Southwestern Europe:</b> Andorra, Cyprus, France, Greece, Israel, Italy, Malta, Portugal, Spain                                                                                                                                                               |
| Latin America and Caribbean                | <b>Andean Latin America:</b> Bolivia, Ecuador, Peru                                                                                                                                                                                                              |
|                                            | <b>Caribbean:</b> Antigua and Barbuda, Bahamas, Barbados, Belize, Bermuda, Cuba, Dominica, Dominican Republic, Grenada, Guyana, Haiti, Jamaica, Puerto Rico, Saint Kitts and Nevis, Saint Lucia, Saint Vincent and the Grenadines, Suriname, Trinidad and Tobago |
|                                            | <b>Central Latin America:</b> Colombia, Costa Rica, El Salvador, Guatemala, Honduras, Mexico, Nicaragua, Panama, Venezuela                                                                                                                                       |
|                                            | <b>Southern Latin America:</b> Argentina, Brazil, Chile, Paraguay, Uruguay                                                                                                                                                                                       |
| Oceania                                    | <b>Melanesia:</b> Fiji, Papua New Guinea, Solomon Islands, Vanuatu                                                                                                                                                                                               |
|                                            | <b>Polynesia and Micronesia:</b> American Samoa, Cook Islands, French Polynesia, Kiribati, Marshall Islands, Micronesia (Federated States of), Nauru, Niue, Palau, Samoa, Tokelau, Tonga, Tuvalu                                                                 |

|                           |                                                                                                                                                                                                                         |
|---------------------------|-------------------------------------------------------------------------------------------------------------------------------------------------------------------------------------------------------------------------|
| <b>South Asia</b>         | <b>South Asia:</b> Afghanistan, Bangladesh, Bhutan, India, Nepal, Pakistan, Sri Lanka                                                                                                                                   |
| <b>Sub-Saharan Africa</b> | <b>Central Africa:</b> Angola, Central African Republic, Congo, DR Congo, Equatorial Guinea, Gabon                                                                                                                      |
|                           | <b>East Africa:</b> Burundi, Comoros, Djibouti, Eritrea, Ethiopia, Kenya, Madagascar, Malawi, Mauritius, Mozambique, Rwanda, Seychelles, Somalia, South Sudan, Sudan, Tanzania, Uganda, Zambia                          |
|                           | <b>Southern Africa:</b> Botswana, Eswatini, Lesotho, Namibia, South Africa, Zimbabwe                                                                                                                                    |
|                           | <b>West Africa:</b> Benin, Burkina Faso, Cabo Verde, Cameroon, Chad, Cote d'Ivoire, Gambia, Ghana, Guinea, Guinea Bissau, Liberia, Mali, Mauritania, Niger, Nigeria, Sao Tome and Principe, Senegal, Sierra Leone, Togo |

\* Although high-income English-speaking countries are geographically separated, they experienced remarkably similar trends in cardiometabolic risk factors and outcomes<sup>1-5</sup>. They were therefore grouped together so that the statistical model shares information amongst them more than it does with other countries that are geographically closer but epidemiologically more distinct.

We did not have data on population by age group for American Samoa, Bermuda, Greenland, and Tokelau. Country-specific estimates were made but were not used in calculation of regional and global prevalence because the latter requires weighting by age-specific population.

**Supplementary Table 2.** Data sources used in the analysis.

| Country                           | Study years | Survey/study name/citation                                                                                                               | Level of representativeness | Rural, urban or both | Age range as in NCD-RisC database * |       | Sample size (height) |        | Sample size (BMI) |        | Note |
|-----------------------------------|-------------|------------------------------------------------------------------------------------------------------------------------------------------|-----------------------------|----------------------|-------------------------------------|-------|----------------------|--------|-------------------|--------|------|
|                                   |             |                                                                                                                                          |                             |                      | Female                              | Male  | Female               | Male   | Female            | Male   |      |
| <b>Central and eastern Europe</b> |             |                                                                                                                                          |                             |                      |                                     |       |                      |        |                   |        |      |
| <i>Central Europe</i>             |             |                                                                                                                                          |                             |                      |                                     |       |                      |        |                   |        |      |
| Albania                           | 2013        | Childhood Obesity Surveillance Initiative 3                                                                                              | National                    | both                 | 7-9                                 | 7-9   | 2794                 | 2971   | 2794              | 2971   |      |
| Albania                           | 2013-2015   | Balkan Survey of Inactivity in Children (BASIC)                                                                                          | Subnational                 | both                 | 5-16                                | 5-16  | 4985                 | 4986   | 4982              | 4986   |      |
| Albania                           | 2015-2016   | Childhood Obesity Surveillance Initiative 4                                                                                              | National                    | both                 | 7-9                                 | 7-9   | 3062                 | 3359   | 3062              | 3358   |      |
| Albania                           | 2017-2018   | DHS                                                                                                                                      | National                    | both                 | 15-59                               | 15-59 | 4557                 | 2044   | 1649              | 727    |      |
| Bosnia and Herzegovina            | 2002        | Non-communicable disease risk factor survey, Federation of B&H                                                                           | Subnational                 | both                 | 25-64                               | 25-64 | 148                  | 73     |                   |        |      |
| Bosnia and Herzegovina            | 2012        | Non-communicable disease risk factor survey, Federation of B&H                                                                           | Subnational                 | both                 | 18+                                 | 18+   | 371                  | 408    | 55                | 72     |      |
| Bulgaria                          | 1993        | Anthropometric characterization of growth and development in children aged 7 to 13 years from Sofia at the beginning of the 21st century | Community                   | urban                | 6-7                                 | 6-7   | 119                  | 109    | 119               | 109    |      |
| Bulgaria                          | 1994        | Anthropometric characterization of growth and development in children aged 7 to 13 years from Sofia at the beginning of the 21st century | Community                   | urban                | 7-8                                 | 7-8   | 118                  | 108    | 118               | 108    |      |
| Bulgaria                          | 1995        | Anthropometric characterization of growth and development in children aged 7 to 13 years from Sofia at the beginning of the 21st century | Community                   | urban                | 8-9                                 | 8-9   | 120                  | 109    | 120               | 109    |      |
| Bulgaria                          | 1996        | Anthropometric characterization of growth and development in children aged 7 to 13 years from Sofia at the beginning of the 21st century | Community                   | urban                | 9-10                                | 9-10  | 119                  | 109    | 119               | 109    |      |
| Bulgaria                          | 1997        | Anthropometric characterization of growth and development in children aged 7 to 13 years from Sofia at the beginning of the 21st century | Community                   | urban                | 10-11                               | 10-11 | 119                  | 109    | 119               | 109    |      |
| Bulgaria                          | 1998        | Anthropometric characterization of growth and development in children aged 7 to 13 years from Sofia at the beginning of the 21st century | Community                   | urban                | 11-12                               | 11-12 | 118                  | 109    | 118               | 109    |      |
| Bulgaria                          | 1995-2001   | Anthropometric characterization of growth and development in children aged 7 to 17 years from Sofia at the beginning of the 21st century | Community                   | urban                | 7-17                                | 7-17  | 1132                 | 1128   | 1132              | 1127   |      |
| Bulgaria                          | 1999        | Anthropometric characterization of growth and development in children aged 7 to 13 years from Sofia at the beginning of the 21st century | Community                   | urban                | 12-13                               | 12-13 | 118                  | 109    | 118               | 109    |      |
| Bulgaria                          | 2004-2005   | Anthropometric characterization of growth and development in children aged 3 to 6 years from Sofia at the beginning of the 21st century  | Community                   | urban                | 5-6                                 | 5-6   | 160                  | 160    | 160               | 160    |      |
| Bulgaria                          | 2008        | Childhood Obesity Surveillance Initiative 1                                                                                              | National                    | both                 | 7-8                                 | 7-8   | 1661                 | 1657   | 1661              | 1657   |      |
| Bulgaria                          | 2013        | Childhood Obesity Surveillance Initiative 3                                                                                              | National                    | both                 | 7                                   | 7     | 1677                 | 1671   | 1677              | 1671   |      |
| Bulgaria                          | 2014        | Bulgarian National Monitoring of Dietary Intake                                                                                          | National                    | both                 | 20+                                 | 20+   | 224                  | 254    |                   |        |      |
| Bulgaria                          | 2015-2016   | Childhood Obesity Surveillance Initiative 4                                                                                              | National                    | both                 | 7                                   | 7     | 1698                 | 1702   | 1698              | 1702   |      |
| Bulgaria                          | 2016        | Feel4Diabetes                                                                                                                            | Community                   | urban                | 6-10                                | 6-10  | 1522                 | 1447   | 1522              | 1447   |      |
| Bulgaria                          | 2016-2017   | Erasmus plus KA2, Healthyland                                                                                                            | Community                   | urban                | 5                                   | 5     | 24                   | 26     | 24                | 26     |      |
| Bulgaria                          | 2017-2018   | Erasmus plus KA2, Healthyland                                                                                                            | Community                   | urban                | 5-6                                 | 5-6   | 51                   | 49     | 51                | 49     |      |
| Bulgaria                          | 2019        | Childhood Obesity Surveillance Initiative 5                                                                                              | National                    | both                 | 7                                   | 7     | 1531                 | 1537   | 1531              | 1536   |      |
| Croatia                           | 2003        | Croatian Adult Health Survey 2003                                                                                                        | National                    | both                 | 18+                                 | 18+   | 627                  | 241    |                   |        |      |
| Croatia                           | 2003-2004   | School Health Survey                                                                                                                     | National                    | both                 | 6-19                                | 6-19  | 1297                 | 1502   | 1297              | 1502   |      |
| Croatia                           | 2002-2007   | Epidemiology of arterial hypertension in Croatia (EH-UH)                                                                                 | National                    | both                 | 18+                                 | 18+   | 48                   | 45     |                   |        |      |
| Croatia                           | 2005        | Endemic Nephropathy and Arterial hypertension (ENAH)                                                                                     | Subnational                 | rural                | 18+                                 | 18+   | 45                   | 37     | 3                 |        |      |
| Croatia                           | 2006-2008   | The cardiovascular risk factors in school age - intervention model development                                                           | National                    | both                 | 6-20                                | 6-20  | 5625                 | 6012   | 5625              | 6011   |      |
| Croatia                           | 2008        | Endemic Nephropathy and Arterial hypertension (ENAH)                                                                                     | Subnational                 | rural                | 18+                                 | 18+   | 63                   | 45     | 8                 | 10     |      |
| Croatia                           | 2010        | Endemic Nephropathy and Arterial hypertension (ENAH)                                                                                     | Subnational                 | rural                | 18+                                 | 18+   | 54                   | 30     | 5                 | 3      |      |
| Croatia                           | 2014        | Croatian Physical Activity in Adolescence Longitudinal Study (CRO-PALS)                                                                  | Community                   | urban                | 14-17                               | 14-17 | 413                  | 429    | 410               | 428    |      |
| Croatia                           | 2015        | Endemic Nephropathy and Arterial hypertension (ENAH) Follow-up Study                                                                     | Subnational                 | rural                | 18+                                 | 18+   | 15                   | 10     |                   |        |      |
| Croatia                           | 2015-2016   | Childhood Obesity Surveillance Initiative 4                                                                                              | National                    | both                 | 8                                   | 8     | 1365                 | 1365   | 1364              | 1364   |      |
| Croatia                           | 2016-2017   | Croatian Physical Activity in Adolescence Longitudinal Study (CRO-PALS)                                                                  | Community                   | urban                | 17-20                               | 17-20 | 384                  | 383    | 384               | 383    |      |
| Croatia                           | 2015-2019   | Motor skills in preschool children                                                                                                       | National                    | both                 | 5-7                                 | 5-7   | 381                  | 407    | 381               | 405    |      |
| Croatia                           | 2019        | Childhood Obesity Surveillance Initiative 5                                                                                              | National                    | both                 | 8-9                                 | 8-9   | 2678                 | 2779   | 2677              | 2778   |      |
| Croatia                           | 2018-2021   | Epidemiology of arterial hypertension in Croatia (EH-UH)                                                                                 | National                    | both                 | 18+                                 | 18+   | 35                   | 16     |                   |        |      |
| Czechia                           | 1981        | 4th Nationwide Anthropometric Survey of Children and Adolescents 1981                                                                    | National                    | both                 | 5-17                                | 5-17  | 22816                | 21972  |                   |        |      |
| Czechia                           | 1991        | 5th Nationwide Anthropometric Survey of Children and Adolescents 1991                                                                    | National                    | both                 | 5-17                                | 5-17  | 35659                | 34641  |                   |        |      |
| Czechia                           | 1997-1998   | Czech post-MONICA                                                                                                                        | National                    | both                 | 25-64                               | 25-64 | 159                  | 140    |                   |        |      |
| Czechia                           | 2000-2001   | Czech post-MONICA                                                                                                                        | National                    | both                 | 25-64                               | 25-64 | 166                  | 151    |                   |        |      |
| Czechia                           | 2001        | 6th Nationwide Anthropometric Survey of Children and Adolescents 2001                                                                    | National                    | both                 | 5-20                                | 5-19  |                      |        | 22523             | 18960  |      |
| Czechia                           | 2008        | Childhood Obesity Surveillance Initiative 1                                                                                              | National                    | both                 | 6-7                                 | 6-7   | 796                  | 800    | 796               | 800    |      |
| Czechia                           | 2006-2009   | Czech post-MONICA                                                                                                                        | National                    | both                 | 25-64                               | 25-64 | 155                  | 135    |                   |        |      |
| Czechia                           | 2010        | Childhood Obesity Surveillance Initiative 2                                                                                              | National                    | both                 | 6-7                                 | 6-7   | 1207                 | 1181   | 1207              | 1181   |      |
| Czechia                           | 2013        | Childhood Obesity Surveillance Initiative 3                                                                                              | National                    | both                 | 6-7                                 | 6-7   | 1153                 | 1229   | 1153              | 1229   |      |
| Czechia                           | 2014-2015   | European Health Examination Survey                                                                                                       | National                    | both                 | 25-64                               | 25-64 | 49                   | 43     |                   |        |      |
| Czechia                           | 2015-2016   | Childhood Obesity Surveillance Initiative 4                                                                                              | National                    | both                 | 6-7                                 | 6-7   | 833                  | 771    | 832               | 771    |      |
| Czechia                           | 2015-2018   | Czech post-MONICA                                                                                                                        | National                    | both                 | 25-64                               | 25-64 | 87                   | 61     |                   |        |      |
| Czechia                           | 2020        | Childhood Obesity Surveillance Initiative 5                                                                                              | National                    | both                 | 6-7                                 | 6-7   | 1097                 | 1136   | 1097              | 1136   |      |
| Czechia                           | 2019-2020   | European Health Examination Survey                                                                                                       | National                    | both                 | 25-64                               | 25-64 | 36                   | 25     |                   |        |      |
| Hungary                           | 2006-2007   | HELENA                                                                                                                                   | Community                   | urban                | 12-17                               | 12-17 | 197                  | 197    | 197               | 197    |      |
| Hungary                           | 2007-2010   | Identification and prevention of Dietary- and lifestyle-induced health Effects In Children and infants (IDEFICS)                         | Community                   | urban                | 5-9                                 | 5-9   | 1169                 | 1128   | 1169              | 1128   |      |
| Hungary                           | 2010        | Childhood Obesity Surveillance Initiative 2                                                                                              | National                    | both                 | 7                                   | 7     | 682                  | 553    | 682               | 553    |      |
| Hungary                           | 2010        | European Energy balance Research to prevent excessive weight Gain among Youth - The ENERGY-project                                       | National                    | both                 | 11-13                               | 11-13 | 558                  | 452    | 557               | 452    |      |
| Hungary                           | 2015-2016   | Childhood Obesity Surveillance Initiative 4                                                                                              | National                    | both                 | 6-8                                 | 6-8   | 2579                 | 2753   | 2572              | 2750   |      |
| Hungary                           | 2016        | Feel4Diabetes                                                                                                                            | Community                   | both                 | 6-10                                | 6-10  | 1522                 | 1447   | 1522              | 1447   |      |
| Hungary                           | 2016        | Hungarian National Student Fitness Test (NETFIT)                                                                                         | National                    | both                 | 14-19                               | 10-19 | 132739               | 134442 | 132326            | 134129 |      |
| Hungary                           | 2016        | Hungarian National Student Fitness Test (NETFIT)                                                                                         | National                    | both                 | 42278                               | 42278 | 158353               | 165185 | 158087            | 164897 |      |
| Hungary                           | 2017        | Hungarian National Student Fitness Test (NETFIT)                                                                                         | National                    | both                 | 14-19                               | 10-19 | 134845               | 136597 | 134646            | 136278 |      |
| Hungary                           | 2017        | Hungarian National Student Fitness Test (NETFIT)                                                                                         | National                    | both                 | 42278                               | 42278 | 163787               | 171217 | 163599            | 170978 |      |
| Hungary                           | 2018        | Hungarian National Student Fitness Test (NETFIT)                                                                                         | National                    | both                 | 14-19                               | 10-19 | 128131               | 129327 | 127821            | 128717 |      |
| Hungary                           | 2018        | Hungarian National Student Fitness Test (NETFIT)                                                                                         | National                    | both                 | 42278                               | 42278 | 163083               | 170447 | 162664            | 169915 |      |
| Hungary                           | 2019        | Childhood Obesity Surveillance Initiative 5                                                                                              | National                    | both                 | 6-8                                 | 6-8   | 2996                 | 3173   | 2996              | 3173   |      |

| Country         | Study years | Survey/study name/citation                                                                                                                                                   | Level of representativeness | Rural, urban or both | Age range as in NCD-RisC database * |       | Sample size (height) |        | Sample size (BMI) |        | Note |
|-----------------|-------------|------------------------------------------------------------------------------------------------------------------------------------------------------------------------------|-----------------------------|----------------------|-------------------------------------|-------|----------------------|--------|-------------------|--------|------|
|                 |             |                                                                                                                                                                              |                             |                      | Female                              | Male  | Female               | Male   | Female            | Male   |      |
| Hungary         | 2019        | Hungarian National Student Fitness Test (NETFIT)                                                                                                                             | National                    | both                 | 14-19                               | 10-19 | 130226               | 132673 | 130182            | 132647 |      |
| Hungary         | 2019        | Hungarian National Student Fitness Test (NETFIT)                                                                                                                             | National                    | both                 | 42278                               | 42278 | 165219               | 171735 | 165199            | 171701 |      |
| Montenegro      | 1987        | Anthropometric Characteristics of Montenegrin Recruiters                                                                                                                     | National                    | both                 |                                     | 17-28 |                      |        |                   | 9934   | 1    |
| Montenegro      | 1988        | Anthropometric Characteristics of Montenegrin Recruiters                                                                                                                     | National                    | both                 |                                     | 17-28 |                      |        |                   | 86     | 1    |
| Montenegro      | 2016        | Anthropometric parameters as an indicator of obesity at adolescents in Montenegro                                                                                            | National                    | both                 | 14-18                               | 14-18 | 771                  | 678    | 771               | 678    |      |
| Montenegro      | 2015-2016   | Childhood Obesity Surveillance Initiative 4                                                                                                                                  | National                    | both                 | 6-8                                 | 6-8   | 1623                 | 1802   | 1623              | 1802   |      |
| Montenegro      | 2019        | Body composition of high school students in Montenegro and its relationship with their eating habits                                                                         | National                    | both                 | 18-20                               | 18-20 | 497                  | 504    | 495               | 501    |      |
| Montenegro      | 2019        | Childhood Obesity Surveillance Initiative 5                                                                                                                                  | National                    | both                 | 6-8                                 | 6-8   | 1626                 | 1729   | 1626              | 1729   |      |
| Montenegro      | 2019        | Initiative for monitoring obesity of children aged 11 to 12 in Montenegro                                                                                                    | National                    | both                 | 11-12                               | 11-12 | 619                  | 666    | 619               | 666    |      |
| Montenegro      | 2019        | Initiative for monitoring obesity of children aged 5 to 6 in Montenegro and Slovenia                                                                                         | National                    | both                 | 5-6                                 | 5-6   | 214                  | 231    | 214               | 231    |      |
| Montenegro      | 2018-2019   | Initiative for monitoring obesity of children aged 6 to 9 in Montenegro and Slovenia                                                                                         | National                    | both                 | 6-9                                 | 6-9   | 969                  | 1072   | 969               | 1072   |      |
| North Macedonia | 1999        | Multiple Indicator Cluster Survey                                                                                                                                            | National                    | both                 | 15-45                               |       | 733                  |        | 46                |        |      |
| North Macedonia | 2009        | Annual assessment of nutritional status of school children aged 7 years                                                                                                      | National                    | both                 | 7                                   | 7     | 983                  | 1088   | 982               | 1087   |      |
| North Macedonia | 2010        | Childhood Obesity Surveillance Initiative 2                                                                                                                                  | National                    | both                 | 7                                   | 7     | 1311                 | 1427   | 1311              | 1427   |      |
| North Macedonia | 2013        | Childhood Obesity Surveillance Initiative 3                                                                                                                                  | National                    | both                 | 6-7                                 | 6-7   | 1511                 | 1655   | 1511              | 1655   |      |
| North Macedonia | 2015-2016   | Childhood Obesity Surveillance Initiative 4                                                                                                                                  | National                    | both                 | 7-8                                 | 7-8   | 1727                 | 1809   | 1727              | 1809   |      |
| North Macedonia | 2019        | Childhood Obesity Surveillance Initiative 5                                                                                                                                  | National                    | both                 | 7-8                                 | 7-8   | 1614                 | 1580   | 1611              | 1579   |      |
| Poland          | 1988        | Fourth National Survey                                                                                                                                                       | Subnational                 | both                 | 7-19                                | 7-19  | 9808                 | 11724  |                   |        |      |
| Poland          | 1995        | Poland Conscripts 10% Sample Cohort                                                                                                                                          | National                    | both                 |                                     | 18-19 |                      | 31026  |                   | 31007  |      |
| Poland          | 1995-1996   | Polish Program CINDI (CINDI Lodz 1995)                                                                                                                                       | Community                   | urban                | 17-64                               | 17-64 | 387                  | 300    | 111               | 79     |      |
| Poland          | 1997        | Wroclaw survey in adolescents                                                                                                                                                | Community                   | both                 | 12-17                               | 12-17 | 2136                 | 2196   | 2136              | 2196   |      |
| Poland          | 2000        | The health status, risk factors of chronic diseases and health behaviors of residents of Torun (CINDI Torun 2000)                                                            | Community                   | urban                | 16-83                               | 16-83 | 264                  | 256    | 85                | 111    |      |
| Poland          | 2000        | Secular trends in BMI changes among the military population between 2000 and 2010 in Poland - a retrospective study                                                          | Subnational                 | both                 |                                     | 19-20 |                      | 3004   |                   | 3003   |      |
| Poland          | 2001        | Secular trends in BMI changes among the military population between 2000 and 2010 in Poland - a retrospective study                                                          | Subnational                 | both                 |                                     | 19-20 |                      | 3425   |                   | 3420   |      |
| Poland          | 2001        | Poland Conscripts 10% Sample Cohort                                                                                                                                          | National                    | both                 |                                     | 18-19 |                      | 31253  |                   | 31211  |      |
| Poland          | 2000-2001   | Household Food Consumption and Anthropometric Survey                                                                                                                         | National                    | both                 | 5+                                  | 5+    | 829                  | 799    | 572               | 555    |      |
| Poland          | 2001-2002   | The health status, risk factors of chronic diseases and health behaviors of residents of Lodz (CINDI Lodz 2001)                                                              | Community                   | urban                | 18-64                               | 18-64 | 258                  | 261    | 39                | 61     |      |
| Poland          | 2002        | Secular trends in BMI changes among the military population between 2000 and 2010 in Poland - a retrospective study                                                          | Subnational                 | both                 |                                     | 19-20 |                      | 3547   |                   | 3544   |      |
| Poland          | 2002        | NATPOL                                                                                                                                                                       | National                    | both                 | 18+                                 | 18+   | 222                  | 201    | 34                | 32     |      |
| Poland          | 2003        | Secular trends in BMI changes among the military population between 2000 and 2010 in Poland - a retrospective study                                                          | Subnational                 | both                 |                                     | 19-20 |                      | 3637   |                   | 3633   |      |
| Poland          | 2004        | Secular trends in BMI changes among the military population between 2000 and 2010 in Poland - a retrospective study                                                          | Subnational                 | both                 |                                     | 19-20 |                      | 3540   |                   | 3538   |      |
| Poland          | 2003-2005   | National Multicenter Health Survey in Poland. Project WOBASZ                                                                                                                 | National                    | both                 | 20-74                               | 20-74 | 1379                 | 1204   |                   |        |      |
| Poland          | 2005        | Secular trends in BMI changes among the military population between 2000 and 2010 in Poland - a retrospective study                                                          | Subnational                 | both                 |                                     | 19-20 |                      | 3308   |                   | 3308   |      |
| Poland          | 2003-2006   | Mogielica Human Ecology Study Site                                                                                                                                           | Community                   | rural                | 18+                                 | 18+   | 60                   | 8      |                   |        |      |
| Poland          | 2006        | The health, risk factors for chronic diseases, attitudes and behaviors of health residents of Torun (CINDI Torun 2006)                                                       | Community                   | urban                | 15-65                               | 15-65 | 257                  | 194    | 74                | 70     |      |
| Poland          | 2006        | Secular trends in BMI changes among the military population between 2000 and 2010 in Poland - a retrospective study                                                          | Subnational                 | both                 |                                     | 19-20 |                      | 3702   |                   | 3701   |      |
| Poland          | 2007        | Secular trends in BMI changes among the military population between 2000 and 2010 in Poland - a retrospective study                                                          | Subnational                 | both                 |                                     | 19-20 |                      | 3612   |                   | 3612   |      |
| Poland          | 2008        | Secular trends in BMI changes among the military population between 2000 and 2010 in Poland - a retrospective study                                                          | Subnational                 | both                 |                                     | 19-20 |                      | 3435   |                   | 3435   |      |
| Poland          | 2007-2009   | Elaboration of the reference range of arterial blood pressure for the population of children and adolescents in Poland - PL0080 OLAF                                         | National                    | both                 | 6-18                                | 6-18  | 9172                 | 8386   | 9162              | 8383   |      |
| Poland          | 2009        | Secular trends in BMI changes among the military population between 2000 and 2010 in Poland - a retrospective study                                                          | Subnational                 | both                 |                                     | 19-20 |                      | 3407   |                   | 3405   |      |
| Poland          | 2007-2010   | Mogielica Human Ecology Study Site                                                                                                                                           | Community                   | rural                | 18+                                 | 18+   | 50                   |        |                   |        |      |
| Poland          | 2010        | Secular trends in BMI changes among the military population between 2000 and 2010 in Poland - a retrospective study                                                          | Subnational                 | both                 |                                     | 19-20 |                      | 3317   |                   | 3317   |      |
| Poland          | 2009-2010   | Poland Conscripts 10% Sample Cohort                                                                                                                                          | National                    | both                 |                                     | 18-19 |                      | 8347   |                   | 8344   |      |
| Poland          | 2011        | NATPOL                                                                                                                                                                       | National                    | both                 | 18-79                               | 18-79 | 266                  | 239    | 29                | 39     |      |
| Poland          | 2010-2012   | Blood pressure references for Polish preschool children - the OLA study                                                                                                      | National                    | both                 | 5-6                                 | 5-6   | 905                  | 926    | 904               | 926    |      |
| Poland          | 2012-2013   | Fifth National Survey                                                                                                                                                        | Subnational                 | both                 | 6-19                                | 6-19  | 2678                 | 3083   | 2677              | 3074   |      |
| Poland          | 2011-2014   | Mogielica Human Ecology Study Site                                                                                                                                           | Community                   | rural                | 18+                                 | 18+   | 8                    |        |                   |        |      |
| Poland          | 2014        | Prevalence of risk factors for obesity and hypertension among Polish children and adolescents                                                                                | Subnational                 | both                 | 7-18                                | 7-18  | 283                  | 285    | 283               | 284    |      |
| Poland          | 2013-2014   | National Multicenter Health Survey in Poland. Project WOBASZ II                                                                                                              | National                    | both                 | 20+                                 | 20+   | 408                  | 392    |                   |        |      |
| Poland          | 2016        | Body fat in Polish adolescents                                                                                                                                               | Community                   | urban                | 11-13                               | 11-13 | 82                   | 76     | 82                | 76     |      |
| Poland          | 2014-2017   | The impact of physical activity and selected perinatal risk factors on the occurrence of overweight and obesity and hypertension in children                                 | Subnational                 | both                 | 5-15                                | 5-15  | 454                  | 516    | 454               | 516    |      |
| Poland          | 2015-2016   | Childhood Obesity Surveillance Initiative 4                                                                                                                                  | National                    | both                 | 8                                   | 8     | 1665                 | 1671   | 1662              | 1671   |      |
| Poland          | 2015-2016   | LIPIDOGAM2015 & LIPIDOGEN2015 Study - National epidemiological study of lipid disorders and selected risk factors of cardiovascular disease in primary health care in Poland | National                    | both                 | 18+                                 | 18+   | 356                  | 214    | 21                | 24     |      |
| Poland          | 2016-2017   | Erasmus plus KA2, Healthyland                                                                                                                                                | Community                   | urban                | 6                                   | 6     | 25                   | 25     | 25                | 25     |      |
| Poland          | 2017        | Multivariate assessment of the occurrence of noncommunicable diseases and their risk factors among preschool children                                                        | Community                   | urban                | 5-7                                 | 5-7   | 206                  | 226    | 206               | 226    |      |
| Poland          | 2016-2017   | The occurrence of overweight and obesity in children from different place of residence                                                                                       | Subnational                 | both                 | 7-13                                | 7-13  | 151                  | 164    | 151               | 164    |      |
| Poland          | 2017        | Preferences for sweet and fatty taste in children and their mothers in association with weight status                                                                        | Subnational                 | both                 | 8-15                                | 8-15  | 150                  | 138    | 150               | 138    |      |
| Poland          | 2017        | Risk factors for obesity among Polish adolescents                                                                                                                            | Community                   | both                 | 14-19                               | 14-19 | 36                   | 39     | 36                | 39     |      |
| Poland          | 2018        | Childhood Obesity Surveillance Initiative 5                                                                                                                                  | National                    | both                 | 8                                   | 8     | 1303                 | 1387   | 1303              | 1387   |      |
| Poland          | 2017-2018   | Erasmus plus KA2, Healthyland                                                                                                                                                | Community                   | urban                | 5-6                                 | 5-6   | 26                   | 24     | 26                | 24     |      |
| Poland          | 2018        | Multivariate assessment of the occurrence of noncommunicable diseases and their risk factors among preschool children                                                        | Community                   | urban                | 5-7                                 | 5-7   | 385                  | 393    | 385               | 393    |      |
| Poland          | 2016-2020   | The prevalence of overweight and obesity and the assessment of body balance among children in a rural area in Poland                                                         | Subnational                 | rural                | 7-15                                | 7-15  | 557                  | 580    | 557               | 580    |      |
| Poland          | 2018        | Mogielica Human Ecology Study Site                                                                                                                                           | Community                   | rural                | 18+                                 | 18+   | 8                    | 4      |                   |        |      |
| Poland          | 2019        | Multivariate assessment of the occurrence of noncommunicable diseases and their risk factors among preschool children                                                        | Community                   | urban                | 5-7                                 | 5-7   | 375                  | 395    | 375               | 395    |      |
| Poland          | 2018-2020   | Child of Kraków 2020                                                                                                                                                         | Community                   | urban                | 5-18                                | 5-18  | 1487                 | 1382   | 1487              | 1382   |      |

| Country  | Study years | Survey/study name/citation                                                                                                        | Level of representativeness | Rural, urban or both | Age range as in NCD-RisC database * |       | Sample size (height) |        | Sample size (BMI) |        | Note |
|----------|-------------|-----------------------------------------------------------------------------------------------------------------------------------|-----------------------------|----------------------|-------------------------------------|-------|----------------------|--------|-------------------|--------|------|
|          |             |                                                                                                                                   |                             |                      | Female                              | Male  | Female               | Male   | Female            | Male   |      |
| Poland   | 2019-2020   | Assessment of the olfactory and taste functions of children with type 1 diabetes                                                  | Community                   | rural                | 10-15                               | 10-15 | 46                   | 54     | 46                | 54     |      |
| Poland   | 2019-2020   | Child health status and risk factors                                                                                              | Subnational                 | both                 | 6-17                                | 6-17  | 325                  | 370    | 325               | 370    |      |
| Romania  | 1999        | Romania physical development                                                                                                      | National                    | both                 | 5-18                                | 5-18  | 43675                | 41890  | 43648             | 41875  |      |
| Romania  | 2006-2008   | Hypertension in Romanian Children and Adolescents: A Cross-Sectional Survey                                                       | Subnational                 | both                 | 5-17                                | 5-17  | 2339                 | 2313   | 2339              | 2313   |      |
| Romania  | 2008        | Healthy traditions for healthy children                                                                                           | Community                   | rural                | 7-11                                | 7-11  | 69                   | 74     | 69                | 74     |      |
| Romania  | 2008-2009   | Healthy traditions for healthy children                                                                                           | Community                   | urban                | 7-11                                | 7-11  | 525                  | 562    | 525               | 562    |      |
| Romania  | 2009-2011   | Study on children in Dolj County, South Romania                                                                                   | Subnational                 | both                 | 5-21                                | 5-21  | 672                  | 746    | 665               | 734    |      |
| Romania  | 2010-2013   | Healthy traditions for healthy children                                                                                           | Community                   | urban                | 5-11                                | 5-11  | 1798                 | 1736   | 1798              | 1736   |      |
| Romania  | 2011-2012   | Study for the Evaluation of Prevalence of Hypertension and cArdiovascular Risk among the Adult Population of Romania - SEPHAR II  | National                    | both                 | 18-80                               | 18-80 | 124                  | 134    | 5                 | 4      |      |
| Romania  | 2013        | Childhood Obesity Surveillance Initiative 3                                                                                       | National                    | both                 | 8                                   | 8     | 2173                 | 2175   | 2173              | 2175   |      |
| Romania  | 2013        | Healthy traditions for healthy children                                                                                           | Subnational                 | rural                | 5-11                                | 5-11  | 107                  | 123    | 107               | 123    |      |
| Romania  | 2013-2014   | Auxological evaluation of school children in Mures County                                                                         | Subnational                 | both                 | 6-14                                | 6-14  | 957                  | 936    | 957               | 936    |      |
| Romania  | 2014        | Timis County Study                                                                                                                | Community                   | urban                | 6-19                                | 6-19  | 205                  | 238    | 205               | 237    |      |
| Romania  | 2014-2015   | Healthy traditions for healthy children                                                                                           | Subnational                 | rural                | 5-10                                | 5-10  | 561                  | 599    | 561               | 599    |      |
| Romania  | 2015        | Healthy traditions for healthy children                                                                                           | Community                   | urban                | 5-10                                | 5-10  | 211                  | 183    | 210               | 183    |      |
| Romania  | 2015-2016   | Childhood Obesity Surveillance Initiative 4                                                                                       | National                    | both                 | 7-9                                 | 7-9   | 3674                 | 3779   | 3595              | 3699   |      |
| Romania  | 2015-2016   | Study for the Evaluation of Prevalence of Hypertension and cArdiovascular Risk among the Adult Population of Romania - SEPHAR III | National                    | both                 | 18-80                               | 18-80 | 184                  | 154    | 26                | 26     |      |
| Romania  | 2016-2017   | Erasmus plus KA2, Healthyland                                                                                                     | Community                   | urban                | 5-6                                 | 5-6   | 16                   | 14     | 16                | 14     |      |
| Romania  | 2017-2018   | Erasmus plus KA2, Healthyland                                                                                                     | Community                   | urban                | 5-7                                 | 5-7   | 34                   | 31     | 34                | 31     |      |
| Romania  | 2018        | Healthy traditions for healthy children                                                                                           | Community                   | both                 | 5-13                                | 5-13  | 1085                 | 1144   | 1085              | 1142   |      |
| Romania  | 2019        | Childhood Obesity Surveillance Initiative 5                                                                                       | National                    | both                 | 7-9                                 | 7-9   | 5142                 | 5234   | 5142              | 5234   |      |
| Romania  | 2019        | Resita preschool measurements                                                                                                     | Community                   | urban                | 5-8                                 | 5-8   | 236                  | 232    | 236               | 232    |      |
| Serbia   | 2000        | Health Status, Health Needs and Utilization of Health Care of the Population of Serbia                                            | National                    | both                 | 7+                                  | 7+    | 1933                 | 1624   | 932               | 884    |      |
| Serbia   | 2006        | The 2006 National Health Survey for the Population of Serbia                                                                      | National                    | both                 | 7+                                  | 7+    | 2382                 | 2361   | 1303              | 1331   |      |
| Serbia   | 2013        | The 2013 National Health Survey for the Population of Serbia                                                                      | National                    | both                 | 7+                                  | 7+    | 2018                 | 1970   | 1091              | 1097   |      |
| Serbia   | 2013-2014   | Stay Fit for Lifelong Health; the Prevalence of Lifestyle Health Conditions in Serbian Population                                 | National                    | urban                | 18-65                               | 18-65 | 42                   | 217    |                   | 4      |      |
| Serbia   | 2015-2016   | Childhood Obesity Surveillance Initiative 4                                                                                       | National                    | both                 | 6-8                                 | 6-8   | 2386                 | 2475   | 2386              | 2475   |      |
| Serbia   | 2019        | Childhood Obesity Surveillance Initiative 5                                                                                       | National                    | both                 | 7-9                                 | 7-9   | 1504                 | 1697   | 1504              | 1697   |      |
| Slovakia | 1985        | Effects of somatic development and environmental factors on blood pressure in children                                            | Community                   | urban                | 5-7                                 | 5-7   | 388                  | 412    |                   |        |      |
| Slovakia | 1993        | Countrywide Integrated Noncommunicable Diseases Intervention Programme                                                            | National                    | both                 | 15-64                               | 15-64 | 135                  | 199    | 135               | 199    |      |
| Slovakia | 1998        | Countrywide Integrated Noncommunicable Diseases Intervention Programme                                                            | National                    | both                 | 15-64                               | 15-64 | 289                  | 249    | 122               | 112    |      |
| Slovakia | 2001        | National Anthropological Survey                                                                                                   | National                    | both                 | 5-6                                 | 5-6   | 806                  | 882    | 806               | 882    |      |
| Slovakia | 2001        | National Anthropological Survey                                                                                                   | National                    | both                 | 6-18                                | 6-18  | 10737                | 10883  | 10667             | 10881  |      |
| Slovakia | 2003        | Countrywide Integrated Noncommunicable Diseases Intervention Programme                                                            | National                    | both                 | 15-64                               | 15-64 | 200                  | 188    | 60                | 89     |      |
| Slovakia | 2008        | Countrywide Integrated Noncommunicable Diseases Intervention Programme                                                            | National                    | both                 | 15-64                               | 15-64 | 108                  | 92     | 36                | 36     |      |
| Slovakia | 2011        | National Anthropological Survey                                                                                                   | National                    | both                 | 7-18                                | 7-18  | 9028                 | 9066   | 9028              | 9064   |      |
| Slovakia | 2011-2012   | European Health Examination Survey                                                                                                | National                    | both                 | 18-64                               | 18-64 | 240                  | 213    | 68                | 46     |      |
| Slovakia | 2015-2016   | Childhood Obesity Surveillance Initiative 4                                                                                       | National                    | both                 | 7                                   | 7     | 1382                 | 1390   | 1379              | 1390   |      |
| Slovakia | 2018        | Childhood Obesity Surveillance Initiative 5                                                                                       | National                    | both                 | 7-8                                 | 7-8   | 3005                 | 2975   | 3004              | 2975   |      |
| Slovenia | 1982        | the SLOFIT monitoring system                                                                                                      | National                    | both                 | 6-19                                | 6-19  | 8583                 | 8817   |                   |        |      |
| Slovenia | 1983        | Analysis of Children's Development in Slovenia (ACDSi)                                                                            | National                    | both                 | 7-14                                | 7-14  | 1200                 | 1160   |                   |        |      |
| Slovenia | 1983        | the SLOFIT monitoring system                                                                                                      | National                    | both                 | 6-19                                | 6-19  | 10177                | 10718  |                   |        |      |
| Slovenia | 1984        | the SLOFIT monitoring system                                                                                                      | National                    | both                 | 6-19                                | 6-19  | 16221                | 17052  |                   |        |      |
| Slovenia | 1985        | the SLOFIT monitoring system                                                                                                      | National                    | both                 | 6-19                                | 6-19  | 19112                | 20403  |                   |        |      |
| Slovenia | 1986        | the SLOFIT monitoring system                                                                                                      | National                    | both                 | 6-19                                | 6-19  | 20061                | 21082  |                   |        |      |
| Slovenia | 1987        | the SLOFIT monitoring system                                                                                                      | National                    | both                 | 6-19                                | 6-19  | 46934                | 48114  | 48784             | 49089  | 1    |
| Slovenia | 1988        | the SLOFIT monitoring system                                                                                                      | National                    | both                 | 6-19                                | 6-19  | 82328                | 84750  | 83390             | 85444  | 1    |
| Slovenia | 1989        | the SLOFIT monitoring system                                                                                                      | National                    | both                 | 6-19                                | 6-19  | 106316               | 106245 | 106639            | 106538 | 1    |
| Slovenia | 1990        | the SLOFIT monitoring system                                                                                                      | National                    | both                 | 6-19                                | 6-19  | 128572               | 129317 | 128572            | 129317 |      |
| Slovenia | 1991        | the SLOFIT monitoring system                                                                                                      | National                    | both                 | 6-19                                | 6-19  | 129843               | 130726 | 129842            | 130726 |      |
| Slovenia | 1992        | the SLOFIT monitoring system                                                                                                      | National                    | both                 | 6-19                                | 6-19  | 134855               | 135243 | 134853            | 135239 |      |
| Slovenia | 1993        | Analysis of Children's Development in Slovenia (ACDSi)                                                                            | National                    | both                 | 6-14                                | 6-14  | 1678                 | 1674   | 1678              | 1674   |      |
| Slovenia | 1993        | the SLOFIT monitoring system                                                                                                      | National                    | both                 | 6-19                                | 6-19  | 141967               | 143183 | 141966            | 143182 |      |
| Slovenia | 1994        | Analysis of Children's Development in Slovenia (ACDSi)                                                                            | National                    | both                 | 14-18                               | 14-18 | 696                  | 683    | 696               | 683    |      |
| Slovenia | 1994        | the SLOFIT monitoring system                                                                                                      | National                    | both                 | 6-19                                | 6-19  | 143290               | 145348 | 143290            | 145348 |      |
| Slovenia | 1995        | the SLOFIT monitoring system                                                                                                      | National                    | both                 | 6-19                                | 6-19  | 140692               | 142246 | 140692            | 142245 |      |
| Slovenia | 1996        | the SLOFIT monitoring system                                                                                                      | National                    | both                 | 6-19                                | 6-19  | 138122               | 140718 | 138120            | 140714 |      |
| Slovenia | 1997        | the SLOFIT monitoring system                                                                                                      | National                    | both                 | 6-19                                | 6-19  | 120331               | 127551 | 120331            | 127551 |      |
| Slovenia | 1998        | the SLOFIT monitoring system                                                                                                      | National                    | both                 | 6-19                                | 6-19  | 121550               | 126342 | 121549            | 126342 |      |
| Slovenia | 1999        | the SLOFIT monitoring system                                                                                                      | National                    | both                 | 6-19                                | 6-19  | 119408               | 122655 | 119408            | 122655 |      |
| Slovenia | 2000        | the SLOFIT monitoring system                                                                                                      | National                    | both                 | 6-19                                | 6-19  | 116281               | 121918 | 116281            | 121918 |      |
| Slovenia | 2001        | the SLOFIT monitoring system                                                                                                      | National                    | both                 | 6-19                                | 6-19  | 114607               | 118997 | 114606            | 118997 |      |
| Slovenia | 2002        | the SLOFIT monitoring system                                                                                                      | National                    | both                 | 6-19                                | 6-19  | 110691               | 114716 | 110691            | 114716 |      |
| Slovenia | 2003        | Analysis of Children's Development in Slovenia (ACDSi)                                                                            | National                    | both                 | 5-14                                | 5-14  | 1939                 | 2061   | 1939              | 2061   |      |
| Slovenia | 2003        | the SLOFIT monitoring system                                                                                                      | National                    | both                 | 6-19                                | 6-19  | 112944               | 117278 | 112944            | 117278 |      |
| Slovenia | 2004        | Analysis of Children's Development in Slovenia (ACDSi)                                                                            | National                    | both                 | 14-19                               | 14-19 | 712                  | 950    | 712               | 950    |      |

| Country               | Study years | Survey/study name/citation                                                                                                    | Level of representativeness | Rural, urban or both | Age range as in NCD-RisC database * |       | Sample size (height) |        | Sample size (BMI) |        | Note |
|-----------------------|-------------|-------------------------------------------------------------------------------------------------------------------------------|-----------------------------|----------------------|-------------------------------------|-------|----------------------|--------|-------------------|--------|------|
|                       |             |                                                                                                                               |                             |                      | Female                              | Male  | Female               | Male   | Female            | Male   |      |
| Slovenia              | 2004        | the SLOFIT monitoring system                                                                                                  | National                    | both                 | 6-19                                | 6-19  | 112576               | 117768 | 112575            | 117768 |      |
| Slovenia              | 2005        | the SLOFIT monitoring system                                                                                                  | National                    | both                 | 6-19                                | 6-19  | 109546               | 114966 | 109542            | 114966 |      |
| Slovenia              | 2006        | the SLOFIT monitoring system                                                                                                  | National                    | both                 | 6-19                                | 6-19  | 102840               | 109878 | 102838            | 109877 |      |
| Slovenia              | 2007        | the SLOFIT monitoring system                                                                                                  | National                    | both                 | 6-19                                | 6-19  | 100366               | 103108 | 100364            | 103105 |      |
| Slovenia              | 2008        | the SLOFIT monitoring system                                                                                                  | National                    | both                 | 6-19                                | 6-19  | 98071                | 103736 | 98070             | 103735 |      |
| Slovenia              | 2009        | the SLOFIT monitoring system                                                                                                  | National                    | both                 | 6-19                                | 6-19  | 98894                | 103673 | 98891             | 103669 |      |
| Slovenia              | 2010        | the SLOFIT monitoring system                                                                                                  | National                    | both                 | 6-19                                | 6-19  | 96687                | 101165 | 96686             | 101163 |      |
| Slovenia              | 2011        | the SLOFIT monitoring system                                                                                                  | National                    | both                 | 6-19                                | 6-19  | 96314                | 100811 | 96309             | 100802 |      |
| Slovenia              | 2012        | the SLOFIT monitoring system                                                                                                  | National                    | both                 | 6-19                                | 6-19  | 95917                | 101178 | 95917             | 101172 |      |
| Slovenia              | 2013        | the SLOFIT monitoring system                                                                                                  | National                    | both                 | 6-19                                | 6-19  | 95669                | 99198  | 95666             | 99191  |      |
| Slovenia              | 2013-2014   | Analysis of Children's Development in Slovenia (ACDSi)                                                                        | National                    | both                 | 6-15                                | 6-15  | 1627                 | 1665   | 1627              | 1665   |      |
| Slovenia              | 2014        | Analysis of Children's Development in Slovenia (ACDSi)                                                                        | National                    | both                 | 14-19                               | 14-19 | 724                  | 703    | 724               | 702    |      |
| Slovenia              | 2014        | the SLOFIT monitoring system                                                                                                  | National                    | both                 | 6-21                                | 6-21  | 97864                | 102793 | 97736             | 102558 |      |
| Slovenia              | 2015        | the SLOFIT monitoring system                                                                                                  | National                    | both                 | 6-19                                | 6-19  | 99295                | 103570 | 99293             | 103568 |      |
| Slovenia              | 2016        | the SLOFIT monitoring system                                                                                                  | National                    | both                 | 6-19                                | 6-19  | 102180               | 107427 | 102174            | 107421 |      |
| Slovenia              | 2017        | the SLOFIT monitoring system                                                                                                  | National                    | both                 | 6-19                                | 6-19  | 104582               | 108784 | 104582            | 108780 |      |
| Slovenia              | 2018        | the SLOFIT monitoring system                                                                                                  | National                    | both                 | 6-19                                | 6-19  | 105866               | 110216 | 105861            | 110213 |      |
| Slovenia              | 2019        | the SLOFIT monitoring system                                                                                                  | National                    | both                 | 6-19                                | 6-19  | 94793                | 99448  | 94791             | 99445  |      |
| <b>Eastern Europe</b> |             |                                                                                                                               |                             |                      |                                     |       |                      |        |                   |        |      |
| Belarus               | 2016-2017   | STEPS                                                                                                                         | National                    | both                 | 18-69                               | 18-69 | 344                  | 331    | 29                | 32     |      |
| Estonia               | 1997        | Pomerleau et al., Public Health Nutrition 3(1):3-10, 2000                                                                     | National                    | both                 | 19-64                               | 19-64 | 224                  | 183    | 11                | 13     |      |
| Estonia               | 2002        | Estonian Biobank                                                                                                              | National                    | both                 | 18+                                 | 18+   | 53                   | 21     | 10                | 5      |      |
| Estonia               | 2003        | Estonian Biobank                                                                                                              | National                    | both                 | 18+                                 | 18+   | 1114                 | 646    | 186               | 153    |      |
| Estonia               | 2004        | Estonian Biobank                                                                                                              | National                    | both                 | 18+                                 | 18+   | 111                  | 74     | 22                | 18     |      |
| Estonia               | 2007        | Estonian Biobank                                                                                                              | National                    | both                 | 18+                                 | 18+   | 465                  | 243    | 95                | 53     |      |
| Estonia               | 2008        | Estonian Biobank                                                                                                              | National                    | both                 | 18+                                 | 18+   | 2766                 | 1592   | 501               | 315    |      |
| Estonia               | 2009        | Estonian Biobank                                                                                                              | National                    | both                 | 18+                                 | 18+   | 1324                 | 1131   | 282               | 204    |      |
| Estonia               | 2007-2010   | Identification and prevention of Dietary- and lifestyle-induced health Effects In Children and infants (IDEFICS)              | Community                   | urban                | 5-9                                 | 5-9   | 634                  | 558    | 634               | 558    |      |
| Estonia               | 2010        | Estonian Biobank                                                                                                              | National                    | both                 | 18+                                 | 18+   | 1609                 | 1320   | 301               | 284    |      |
| Estonia               | 2013-2015   | National Dietary Survey (RTU) 2014                                                                                            | National                    | both                 | 5-74                                | 5-74  | 753                  | 574    | 475               | 400    |      |
| Estonia               | 2015-2016   | Childhood Obesity Surveillance Initiative 4                                                                                   | National                    | both                 | 7-8                                 | 7-8   | 6196                 | 6495   | 6192              | 6489   |      |
| Estonia               | 2018-2019   | Childhood Obesity Surveillance Initiative 5                                                                                   | National                    | both                 | 7-11                                | 7-11  | 6036                 | 6061   | 6036              | 6060   |      |
| Latvia                | 2008        | Childhood Obesity Surveillance Initiative 1                                                                                   | National                    | both                 | 7-8                                 | 7-8   | 2101                 | 2283   | 2101              | 2283   |      |
| Latvia                | 2008-2009   | Cardiovascular risk factor study                                                                                              | National                    | both                 | 25-74                               | 25-74 | 218                  | 135    |                   |        |      |
| Latvia                | 2010        | Childhood Obesity Surveillance Initiative 2                                                                                   | National                    | both                 | 7-8                                 | 7-8   | 2053                 | 2093   | 2053              | 2093   |      |
| Latvia                | 2012        | Childhood Obesity Surveillance Initiative 3                                                                                   | National                    | both                 | 6-7                                 | 6-7   | 1677                 | 1804   | 1677              | 1804   |      |
| Latvia                | 2015-2016   | Childhood Obesity Surveillance Initiative 4                                                                                   | National                    | both                 | 7-9                                 | 7-9   | 2991                 | 2952   | 2991              | 2952   |      |
| Latvia                | 2019        | Childhood Obesity Surveillance Initiative 5                                                                                   | National                    | both                 | 6-9                                 | 6-9   | 3441                 | 3420   | 3441              | 3420   |      |
| Lithuania             | 1998-1999   | Countrywide Integrated Noncommunicable Diseases Intervention Programme survey                                                 | Subnational                 | rural                | 25-64                               | 25-64 | 61                   | 48     |                   |        |      |
| Lithuania             | 2002        | Pomerleau et al., Public Health Nutrition 3(1):3-10, 2000                                                                     | National                    | both                 | 24-70                               | 24-70 | 189                  | 69     |                   |        |      |
| Lithuania             | 2006-2007   | Countrywide Integrated Noncommunicable Diseases Intervention Programme survey                                                 | Subnational                 | rural                | 25-64                               | 25-64 | 74                   | 45     |                   |        |      |
| Lithuania             | 2008        | Childhood Obesity Surveillance Initiative 1                                                                                   | National                    | both                 | 7-8                                 | 7-8   | 2344                 | 2532   | 2344              | 2532   |      |
| Lithuania             | 2010        | Childhood Obesity Surveillance Initiative 2                                                                                   | National                    | both                 | 7-9                                 | 7-9   | 3414                 | 3306   | 3414              | 3306   |      |
| Lithuania             | 2010-2012   | Prevalence and risk factors of high blood pressure in 12-15-year-old Lithuanian children and adolescents (Study 1, 2010-2012) | Community                   | both                 | 12-15                               | 12-15 | 3963                 | 3494   | 3963              | 3494   |      |
| Lithuania             | 2013        | Childhood Obesity Surveillance Initiative 3                                                                                   | National                    | both                 | 7-8                                 | 7-8   | 1885                 | 1878   | 1884              | 1878   |      |
| Lithuania             | 2012-2013   | Prevalence and risk factors of high blood pressure in 12-15-year-old Lithuanian children and adolescents (Study 2, 2012-2013) | Community                   | both                 | 12-15                               | 12-15 | 985                  | 962    | 985               | 962    |      |
| Lithuania             | 2015-2016   | Childhood Obesity Surveillance Initiative 4                                                                                   | National                    | both                 | 7-8                                 | 7-8   | 1681                 | 1735   | 1665              | 1721   |      |
| Lithuania             | 2019        | Childhood Obesity Surveillance Initiative 5                                                                                   | National                    | both                 | 7-8                                 | 7-8   | 1569                 | 1633   | 1569              | 1633   |      |
| Moldova               | 2005        | DHS                                                                                                                           | National                    | both                 | 15-49                               |       | 3445                 |        | 1364              |        |      |
| Moldova               | 2013        | Childhood Obesity Surveillance Initiative 3                                                                                   | National                    | both                 | 7-8                                 | 7-8   | 1751                 | 1931   | 1751              | 1931   |      |
| Moldova               | 2013        | STEPS                                                                                                                         | National                    | both                 | 18-69                               | 18-69 | 464                  | 314    | 67                | 60     |      |
| Russian Federation    | 1992-1993   | Russia Longitudinal Monitoring Survey- Higher School of Economics Round II                                                    | National                    | both                 | 5+                                  | 5+    | 584                  | 547    | 576               | 547    |      |
| Russian Federation    | 1993        | Russia Longitudinal Monitoring Survey- Higher School of Economics Round III                                                   | National                    | both                 | 5+                                  | 5+    | 1567                 | 1643   | 1536              | 1631   |      |
| Russian Federation    | 1993-1994   | Russia Longitudinal Monitoring Survey- Higher School of Economics Round IV                                                    | National                    | both                 | 5+                                  | 5+    | 1655                 | 1664   | 1605              | 1617   |      |
| Russian Federation    | 1994        | Russia Longitudinal Monitoring Survey- Higher School of Economics Round V                                                     | National                    | both                 | 5+                                  | 5+    | 1250                 | 1278   | 1240              | 1268   |      |
| Russian Federation    | 1995        | Russia Longitudinal Monitoring Survey- Higher School of Economics Round VI                                                    | National                    | both                 | 5+                                  | 5+    | 1201                 | 1212   | 1201              | 1210   |      |
| Russian Federation    | 1996        | Russia Longitudinal Monitoring Survey- Higher School of Economics Round VII                                                   | National                    | both                 | 5+                                  | 5+    | 1970                 | 1845   | 1167              | 1179   |      |
| Russian Federation    | 1998-1999   | Russia Longitudinal Monitoring Survey- Higher School of Economics Round VIII                                                  | National                    | both                 | 5+                                  | 5+    | 2019                 | 1918   | 1195              | 1202   |      |
| Russian Federation    | 2000        | Russia Longitudinal Monitoring Survey- Higher School of Economics Round IX                                                    | National                    | both                 | 5+                                  | 5+    | 2098                 | 2019   | 1174              | 1225   |      |
| Russian Federation    | 2001        | Russia Longitudinal Monitoring Survey- Higher School of Economics Round X                                                     | National                    | both                 | 5+                                  | 5+    | 2326                 | 2178   | 1269              | 1298   |      |
| Russian Federation    | 2002        | Russia Longitudinal Monitoring Survey- Higher School of Economics Round XI                                                    | National                    | both                 | 5+                                  | 5+    | 2372                 | 2244   | 1291              | 1301   |      |
| Russian Federation    | 2002        | Russian Karelia Survey in Pitkaranta                                                                                          | Community                   | both                 | 25-64                               | 25-64 | 40                   | 35     |                   |        |      |
| Russian Federation    | 2003        | Russia Longitudinal Monitoring Survey- Higher School of Economics Round XII                                                   | National                    | both                 | 5+                                  | 5+    | 2385                 | 2284   | 1260              | 1315   |      |
| Russian Federation    | 2003        | School Children Moscow                                                                                                        | Community                   | urban                | 7-8                                 | 7-8   | 112                  | 133    | 112               | 133    |      |
| Russian Federation    | 2004        | Russia Longitudinal Monitoring Survey- Higher School of Economics Round XIII                                                  | National                    | both                 | 5+                                  | 5+    | 2347                 | 2225   | 1231              | 1267   |      |
| Russian Federation    | 2004        | School Children Moscow                                                                                                        | Community                   | urban                | 8-9                                 | 8-9   | 185                  | 180    | 185               | 180    |      |

| Country                                           | Study years | Survey/study name/citation                                                                            | Level of representativeness | Rural, urban or both | Age range as in NCD-RisC database * |       | Sample size (height) |      | Sample size (BMI) |      | Note |
|---------------------------------------------------|-------------|-------------------------------------------------------------------------------------------------------|-----------------------------|----------------------|-------------------------------------|-------|----------------------|------|-------------------|------|------|
|                                                   |             |                                                                                                       |                             |                      | Female                              | Male  | Female               | Male | Female            | Male |      |
| Russian Federation                                | 2005        | Russia Longitudinal Monitoring Survey- Higher School of Economics Round XIV                           | National                    | both                 | 5+                                  | 5+    | 2228                 | 2156 | 1143              | 1214 |      |
| Russian Federation                                | 2005        | School Children Moscow                                                                                | Community                   | urban                | 9-10                                | 9-10  | 191                  | 178  | 191               | 178  |      |
| Russian Federation                                | 2006        | School Children Moscow                                                                                | Community                   | urban                | 10-11                               | 10-11 | 195                  | 163  | 195               | 163  |      |
| Russian Federation                                | 2007        | School Children Moscow                                                                                | Community                   | urban                | 11-12                               | 11-12 | 167                  | 143  | 167               | 143  |      |
| Russian Federation                                | 2007        | Russian Karelia Survey in Pitkaranta                                                                  | Community                   | both                 | 25-64                               | 25-64 | 26                   | 17   |                   |      |      |
| Russian Federation                                | 2008        | School Children Moscow                                                                                | Community                   | urban                | 12-13                               | 12-13 | 141                  | 111  | 141               | 111  |      |
| Russian Federation                                | 2009        | School Children Moscow                                                                                | Community                   | urban                | 13-14                               | 13-14 | 140                  | 124  | 140               | 124  |      |
| Russian Federation                                | 2010        | School Children Moscow                                                                                | Community                   | urban                | 14-15                               | 14-15 | 137                  | 116  | 137               | 116  |      |
| Russian Federation                                | 2011        | School Children Moscow                                                                                | Community                   | urban                | 15-16                               | 15-16 | 125                  | 117  | 125               | 117  |      |
| Russian Federation                                | 2012        | School Children Moscow                                                                                | Community                   | urban                | 16-17                               | 16-17 | 108                  | 87   | 108               | 87   |      |
| Russian Federation                                | 2012-2014   | Epidemiology of Cardiovascular Diseases in Different Regions of Russia (ESSE-RF)                      | National                    | both                 | 25-64                               | 25-64 | 1249                 | 1192 |                   |      |      |
| Russian Federation                                | 2015-2016   | Childhood Obesity Surveillance Initiative 4                                                           | Community                   | urban                | 6-8                                 | 6-8   | 1529                 | 1499 | 1529              | 1499 |      |
| Russian Federation                                | 2017        | Epidemiology of Cardiovascular Diseases in Different Regions of Russia - 2 (ESSE-RF-2)                | Subnational                 | both                 | 25-64                               | 25-64 | 384                  | 365  |                   |      |      |
| Russian Federation                                | 2020        | Childhood Obesity Surveillance Initiative 5                                                           | Community                   | urban                | 7                                   | 7     | 1376                 | 1310 | 1376              | 1310 |      |
| Russian Federation                                | 2019-2020   | Childhood Obesity Surveillance Initiative 5                                                           | Community                   | urban                | 6-7                                 | 6-7   | 1203                 | 1201 | 1202              | 1201 |      |
| Russian Federation                                | 2019-2021   | Ural Children Eye Study                                                                               | Community                   | urban                | 6-18                                | 6-18  | 2053                 | 1951 | 2052              | 1950 |      |
| Ukraine                                           | 2006-2007   | Physical Development of School Children Ukraine                                                       | Community                   | rural                | 6-17                                | 6-17  | 1336                 | 1226 | 1336              | 1226 |      |
| Ukraine                                           | 2007-2008   | Physical Development of School Children Ukraine                                                       | Community                   | urban                | 6-17                                | 6-17  | 1126                 | 1224 | 1126              | 1224 |      |
| Ukraine                                           | 2012        | Epidemiological aspects of obesity and systemic hypertension among school children of Western Ukraine | Community                   | urban                | 10-17                               | 10-17 | 257                  | 271  | 257               | 271  |      |
| Ukraine                                           | 2013-2014   | The prevalence of underweight, overweight and obesity in children and adolescents from Ukraine        | National                    | both                 | 6-18                                | 6-18  | 7143                 | 6596 | 7143              | 6596 |      |
| Ukraine                                           | 2018        | Prevalence of obesity in Ukrainian children and adolescents                                           | National                    | both                 | 7-17                                | 7-17  | 4667                 | 4471 | 4667              | 4471 |      |
| Ukraine                                           | 2019        | Prevalence of obesity in Ukrainian children and adolescents                                           | National                    | both                 | 7-17                                | 7-17  | 4760                 | 4245 | 4760              | 4245 |      |
| Ukraine                                           | 2019        | STEPS                                                                                                 | National                    | both                 | 18-69                               | 18-69 | 299                  | 256  | 41                | 28   |      |
| <b>Central Asia, Middle East and north Africa</b> |             |                                                                                                       |                             |                      |                                     |       |                      |      |                   |      |      |
| <i>Central Asia</i>                               |             |                                                                                                       |                             |                      |                                     |       |                      |      |                   |      |      |
| Armenia                                           | 1998        | The health and nutritional status of children and women in Armenia                                    | National                    | both                 | 18-45                               |       | 1502                 |      | 72                |      |      |
| Armenia                                           | 2000        | DHS                                                                                                   | National                    | both                 | 15-49                               |       | 2794                 |      | 1090              |      |      |
| Armenia                                           | 2005        | DHS                                                                                                   | National                    | both                 | 15-49                               | 15-49 | 2982                 | 577  | 1064              | 236  |      |
| Armenia                                           | 2015-2016   | DHS                                                                                                   | National                    | both                 | 15-49                               |       | 2640                 |      | 707               |      |      |
| Armenia                                           | 2016        | STEPS                                                                                                 | National                    | both                 | 18-69                               | 18-69 | 270                  | 168  | 26                | 14   |      |
| Armenia                                           | 2019        | Childhood Obesity Surveillance Initiative 5                                                           | National                    | both                 | 7-8                                 | 7-8   | 1712                 | 1875 | 1703              | 1860 |      |
| Azerbaijan                                        | 1996        | Health and Nutrition Survey                                                                           | National                    | both                 | 19-59                               | 19-59 | 137                  | 34   | 3                 |      |      |
| Azerbaijan                                        | 2006        | DHS                                                                                                   | National                    | both                 | 15-49                               | 15-59 | 3814                 | 984  | 1402              | 368  |      |
| Azerbaijan                                        | 2013        | Azerbaijan Nutrition Survey                                                                           | National                    | both                 | 15-49                               |       | 1339                 |      | 399               |      |      |
| Azerbaijan                                        | 2017        | STEPS                                                                                                 | National                    | both                 | 18-69                               | 18-69 | 252                  | 212  | 28                | 21   |      |
| Georgia                                           | 2010        | STEPS                                                                                                 | National                    | both                 | 18-64                               | 18-64 | 678                  | 392  | 144               | 97   |      |
| Georgia                                           | 2015-2016   | Childhood Obesity Surveillance Initiative 4                                                           | National                    | both                 | 7-8                                 | 7-8   | 1585                 | 1687 | 1585              | 1685 |      |
| Georgia                                           | 2016        | STEPS                                                                                                 | National                    | both                 | 18-69                               | 18-69 | 352                  | 204  | 49                | 26   |      |
| Georgia                                           | 2019        | Childhood Obesity Surveillance Initiative 5                                                           | National                    | both                 | 7-8                                 | 7-8   | 1646                 | 1777 | 1646              | 1777 |      |
| Kazakhstan                                        | 1995        | DHS                                                                                                   | National                    | both                 | 15-49                               |       | 650                  |      | 638               |      |      |
| Kazakhstan                                        | 1999        | DHS                                                                                                   | National                    | both                 | 15-49                               |       | 1027                 |      | 341               |      |      |
| Kazakhstan                                        | 2015        | Almaty STEPS                                                                                          | Subnational                 | both                 | 18-69                               | 18-69 | 171                  | 65   | 8                 | 7    |      |
| Kazakhstan                                        | 2015        | Shymkent STEPS                                                                                        | Subnational                 | both                 | 18-69                               | 18-69 | 152                  | 90   | 22                | 19   |      |
| Kazakhstan                                        | 2015-2016   | Aktobe STEPS                                                                                          | Subnational                 | both                 | 18-69                               | 18-69 | 179                  | 73   | 12                | 3    |      |
| Kazakhstan                                        | 2015-2016   | Childhood Obesity Surveillance Initiative 4                                                           | National                    | both                 | 8-10                                | 8-10  | 2683                 | 2756 | 2683              | 2755 |      |
| Kazakhstan                                        | 2019        | A health status assessment of a population of Karaganda urban region                                  | Community                   | urban                | 18+                                 | 18+   | 92                   | 67   | 6                 |      |      |
| Kazakhstan                                        | 2018-2019   | Early diagnosis of metabolic syndrome in children and adolescents of Semey Region                     | Subnational                 | both                 | 6-18                                | 6-18  | 963                  | 1008 | 963               | 1008 |      |
| Kazakhstan                                        | 2020        | Childhood Obesity Surveillance Initiative 5                                                           | National                    | both                 | 6-9                                 | 6-9   | 3379                 | 3396 | 3379              | 3396 |      |
| Kyrgyzstan                                        | 1997        | DHS                                                                                                   | National                    | both                 | 15-49                               |       | 1904                 |      | 699               |      |      |
| Kyrgyzstan                                        | 2012        | DHS                                                                                                   | National                    | both                 | 15-49                               |       | 4343                 |      | 1526              |      |      |
| Kyrgyzstan                                        | 2013        | STEPS                                                                                                 | National                    | both                 | 25-64                               | 25-64 | 221                  | 134  |                   |      |      |
| Kyrgyzstan                                        | 2015-2016   | Childhood Obesity Surveillance Initiative 4                                                           | National                    | both                 | 6-9                                 | 6-9   | 3955                 | 4025 | 3905              | 3944 |      |
| Mongolia                                          | 2005        | STEPS                                                                                                 | National                    | both                 | 15-64                               | 15-64 | 519                  | 512  | 194               | 227  |      |
| Mongolia                                          | 2009        | STEPS                                                                                                 | National                    | both                 | 15-64                               | 15-64 | 932                  | 661  | 228               | 180  |      |
| Mongolia                                          | 2013        | Global School-based Student Health Survey                                                             | National                    | both                 | 13-17                               | 13-17 | 2360                 | 2095 | 2360              | 2095 |      |
| Mongolia                                          | 2013        | STEPS                                                                                                 | National                    | both                 | 15-64                               | 15-64 | 1234                 | 1124 | 471               | 492  |      |
| Mongolia                                          | 2019        | STEPS                                                                                                 | National                    | both                 | 15-69                               | 15-69 | 755                  | 654  | 176               | 163  |      |
| Tajikistan                                        | 2003        | Micronutrient Status Survey                                                                           | National                    | both                 | 15-49                               |       | 1179                 |      | 355               |      |      |
| Tajikistan                                        | 2012        | DHS                                                                                                   | National                    | both                 | 15-49                               |       | 5455                 |      | 1923              |      |      |
| Tajikistan                                        | 2015-2016   | Childhood Obesity Surveillance Initiative 4                                                           | National                    | both                 | 7                                   | 7     | 1519                 | 1502 | 1457              | 1438 |      |
| Tajikistan                                        | 2016        | STEPS                                                                                                 | National                    | both                 | 18-69                               | 18-69 | 394                  | 310  | 38                | 38   |      |
| Tajikistan                                        | 2017        | DHS                                                                                                   | National                    | both                 | 15-49                               |       | 5714                 |      | 1815              |      |      |
| Tajikistan                                        | 2019        | Childhood Obesity Surveillance Initiative 5                                                           | National                    | both                 | 7-8                                 | 7-8   | 1623                 | 1809 | 1621              | 1809 |      |
| Turkmenistan                                      | 2000        | DHS                                                                                                   | National                    | both                 | 15-49                               |       | 1390                 |      |                   |      |      |
| Turkmenistan                                      | 2013        | STEPS                                                                                                 | National                    | both                 | 18-64                               | 18-64 | 767                  | 559  | 121               | 51   |      |
| Turkmenistan                                      | 2015-2016   | Childhood Obesity Surveillance Initiative 4                                                           | National                    | both                 | 7-8                                 | 7-8   | 1976                 | 1973 | 1956              | 1952 |      |



| Country                             | Study years | Survey/study name/citation                                                                              | Level of representativeness | Rural, urban or both | Age range as in NCD-RisC database * |       | Sample size (height) |        | Sample size (BMI) |        | Note |
|-------------------------------------|-------------|---------------------------------------------------------------------------------------------------------|-----------------------------|----------------------|-------------------------------------|-------|----------------------|--------|-------------------|--------|------|
|                                     |             |                                                                                                         |                             |                      | Female                              | Male  | Female               | Male   | Female            | Male   |      |
| Turkmenistan                        | 2018        | STEPS                                                                                                   | National                    | both                 | 18-69                               | 18-69 | 523                  | 429    | 65                | 29     |      |
| Uzbekistan                          | 1996        | DHS                                                                                                     | National                    | both                 | 15-49                               |       | 2440                 |        | 898               |        |      |
| Uzbekistan                          | 2002        | DHS                                                                                                     | National                    | both                 | 15-49                               | 15-59 | 3008                 | 1165   | 1104              | 418    |      |
| Uzbekistan                          | 2014        | STEPS                                                                                                   | National                    | both                 | 18-64                               | 18-64 | 582                  | 461    | 75                | 83     |      |
| Uzbekistan                          | 2019        | STEPS                                                                                                   | National                    | both                 | 18-69                               | 18-69 | 258                  | 172    | 25                | 10     |      |
| <i>Middle East and north Africa</i> |             |                                                                                                         |                             |                      |                                     |       |                      |        |                   |        |      |
| Algeria                             | 2003        | STEPS                                                                                                   | Subnational                 | both                 | 25-64                               | 25-64 | 478                  | 256    |                   |        |      |
| Algeria                             | 2016-2017   | STEPS                                                                                                   | National                    | both                 | 18-69                               | 18-69 | 788                  | 626    | 120               | 99     |      |
| Bahrain                             | 1998-1999   | National Nutrition Survey                                                                               | National                    | both                 | 19+                                 | 19+   | 203                  | 212    |                   |        |      |
| Bahrain                             | 2001-2004   | Global database on growth and malnutrition of school children and adolescents, WHO                      | National                    | both                 | 6-20                                | 6-19  |                      |        | 1326              | 1268   |      |
| Bahrain                             | 2016        | Global School-based Student Health Survey                                                               | National                    | both                 | 12-17                               | 12-17 | 3262                 | 3416   | 3262              | 3416   |      |
| Egypt                               | 2000        | DHS                                                                                                     | National                    | both                 | 20-49                               |       | 5026                 |        |                   |        |      |
| Egypt                               | 2002        | National Survey of Smoking, Obesity, Blood Pressure and Blood Glucose                                   | National                    | both                 | 5+                                  | 5+    | 2836                 | 2371   | 1793              | 1685   |      |
| Egypt                               | 2003        | DHS                                                                                                     | National                    | both                 | 20-49                               |       | 3159                 |        |                   |        |      |
| Egypt                               | 2003-2004   | Marzouk et al., Gut 56(8):1105-10, 2007                                                                 | Community                   | rural                | 25+                                 | 25+   | 66                   | 39     |                   |        |      |
| Egypt                               | 2005        | STEPS                                                                                                   | National                    | both                 | 15-65                               | 15-65 | 2102                 | 2148   | 659               | 812    |      |
| Egypt                               | 2005        | DHS                                                                                                     | National                    | both                 | 20-49                               |       | 6725                 |        |                   |        |      |
| Egypt                               | 2008        | DHS                                                                                                     | National                    | both                 | 20-49                               | 10-59 | 6570                 | 11328  |                   | 9694   |      |
| Egypt                               | 2011        | Global School-based Student Health Survey                                                               | National                    | both                 | 13-17                               | 13-17 | 454                  | 325    | 454               | 325    |      |
| Egypt                               | 2011        | STEPS                                                                                                   | National                    | both                 | 15-65                               | 15-65 | 965                  | 533    | 222               | 185    |      |
| Egypt                               | 2014        | DHS                                                                                                     | National                    | both                 | 20-49                               |       | 7717                 |        |                   |        |      |
| Egypt                               | 2015        | DHS                                                                                                     | National                    | both                 | 15-59                               | 15-59 | 3988                 | 3035   | 1330              | 1226   |      |
| Egypt                               | 2017        | STEPS                                                                                                   | National                    | both                 | 15-69                               | 15-69 | 947                  | 638    | 316               | 279    |      |
| Iran                                | 1990-1991   | National Health Survey I                                                                                | National                    | both                 | 5-18                                | 5-18  | 9220                 | 9083   | 9038              | 8883   |      |
| Iran                                | 1999-2000   | National Health Survey II                                                                               | National                    | both                 | 5+                                  | 5+    | 16933                | 14769  | 11480             | 11063  |      |
| Iran                                | 1999-2001   | Tehran Lipid and Glucose Study                                                                          | Community                   | urban                | 5+                                  | 5+    | 3626                 | 2878   | 2226              | 2033   |      |
| Iran                                | 2001        | Isfahan Healthy Heart Programme (IHHP), Arak                                                            | Community                   | both                 | 19+                                 | 19+   | 987                  | 1030   | 93                | 128    |      |
| Iran                                | 2001        | Isfahan Healthy Heart Programme (IHHP), Isfahan                                                         | Community                   | both                 | 19+                                 | 19+   | 666                  | 677    | 67                | 75     |      |
| Iran                                | 2001        | Isfahan Healthy Heart Programme (IHHP), Najaf Abad                                                      | Community                   | both                 | 19+                                 | 19+   | 303                  | 327    | 22                | 25     |      |
| Iran                                | 2001        | Isfahan Healthy Heart Programme (IHHP) Students, Arak                                                   | Community                   | both                 | 11-18                               | 11-18 | 495                  | 467    | 495               | 467    |      |
| Iran                                | 2001        | Isfahan Healthy Heart Programme (IHHP) Students, Isfahan                                                | Community                   | both                 | 11-18                               | 11-18 | 343                  | 331    | 343               | 331    |      |
| Iran                                | 2001        | Isfahan Healthy Heart Programme (IHHP) Students, Najaf Abad                                             | Community                   | both                 | 11-18                               | 11-18 | 146                  | 123    | 146               | 123    |      |
| Iran                                | 2003-2004   | Childhood and Adolescence Surveillance and Prevention of Adult Noncommunicable Disease (CASPIAN)        | National                    | both                 | 6-18                                | 6-18  | 10180                | 10805  | 10170             | 10791  |      |
| Iran                                | 2002-2005   | Tehran Lipid and Glucose Study                                                                          | Community                   | urban                | 5+                                  | 5+    | 1385                 | 1079   | 790               | 698    |      |
| Iran                                | 2003-2004   | The Persian Gulf Healthy Heart Study                                                                    | Subnational                 | urban                | 25-75                               | 25-75 | 350                  | 326    |                   |        |      |
| Iran                                | 2005        | Dastgiri et al., Public Health Nutr 9(8): 996-1000, 2006                                                | Subnational                 | urban                | 15-70                               | 15-70 | 66                   | 51     | 21                | 14     |      |
| Iran                                | 2005        | STEPS                                                                                                   | National                    | both                 | 15-64                               | 15-64 | 12022                | 12409  | 4069              | 4546   |      |
| Iran                                | 2006        | STEPS                                                                                                   | National                    | both                 | 16-65                               | 16-65 | 4224                 | 4437   | 1238              | 1470   |      |
| Iran                                | 2007        | Isfahan Healthy Heart Programme (IHHP), Arak                                                            | Community                   | both                 | 19+                                 | 19+   | 756                  | 894    | 79                | 121    |      |
| Iran                                | 2007        | Isfahan Healthy Heart Programme (IHHP), Isfahan                                                         | Community                   | both                 | 19+                                 | 19+   | 482                  | 553    | 22                | 38     |      |
| Iran                                | 2007        | Isfahan Healthy Heart Programme (IHHP), Najaf Abad                                                      | Community                   | both                 | 19+                                 | 19+   | 294                  | 259    | 18                | 15     |      |
| Iran                                | 2007        | Isfahan Healthy Heart Programme (IHHP) Students, Arak                                                   | Community                   | both                 | 11-18                               | 11-18 | 505                  | 504    | 505               | 504    |      |
| Iran                                | 2007        | Isfahan Healthy Heart Programme (IHHP) Students, Isfahan                                                | Community                   | both                 | 11-18                               | 11-18 | 354                  | 412    | 354               | 412    |      |
| Iran                                | 2007        | Isfahan Healthy Heart Programme (IHHP) Students, Najaf Abad                                             | Community                   | both                 | 11-18                               | 11-18 | 106                  | 82     | 106               | 82     |      |
| Iran                                | 2007        | STEPS                                                                                                   | National                    | both                 | 15-64                               | 15-64 | 701                  | 743    | 195               | 255    |      |
| Iran                                | 2007        | STEPS                                                                                                   | National                    | both                 | 15-64                               | 15-64 | 4358                 | 4640   | 1347              | 1678   |      |
| Iran                                | 2005-2008   | Tehran Lipid and Glucose Study                                                                          | Community                   | urban                | 5+                                  | 5+    | 1448                 | 1201   | 701               | 660    |      |
| Iran                                | 2008        | STEPS                                                                                                   | National                    | both                 | 15-64                               | 15-64 | 4384                 | 4596   | 1366              | 1706   |      |
| Iran                                | 2009        | STEPS                                                                                                   | National                    | both                 | 15-64                               | 15-64 | 4370                 | 4717   | 1347              | 1594   |      |
| Iran                                | 2009-2010   | Childhood and Adolescence Surveillance and Prevention of Adult Noncommunicable Disease (CASPIAN)        | National                    | both                 | 10-18                               | 10-18 | 2814                 | 2799   | 2814              | 2799   |      |
| Iran                                | 2008-2011   | Tehran Lipid and Glucose Study                                                                          | Community                   | urban                | 20+                                 | 20+   | 1318                 | 999    |                   |        |      |
| Iran                                | 2011        | STEPS                                                                                                   | National                    | both                 | 6-69                                | 6-69  | 2507                 | 2203   | 1027              | 1018   |      |
| Iran                                | 2011-2012   | Amol county study                                                                                       | Community                   | both                 | 10+                                 | 10+   | 700                  | 1017   | 266               | 434    |      |
| Iran                                | 2011-2012   | Childhood and Adolescence Surveillance and Prevention of Adult Noncommunicable Disease (CASPIAN)        | National                    | both                 | 6-18                                | 6-18  | 6448                 | 6658   | 6443              | 6648   |      |
| Iran                                | 2012        | National Integrated Micronutrient Survey (NIMS) 2012                                                    | National                    | both                 | 6-60                                | 6-60  | 6510                 | 6066   | 5978              | 5649   |      |
| Iran                                | 2012-2013   | Tehran City                                                                                             | Community                   | urban                | 10-90                               | 10-90 | 136                  | 116    | 41                | 39     |      |
| Iran                                | 2012-2013   | Zahedan City                                                                                            | Community                   | urban                | 10-90                               | 10-90 | 471                  | 578    | 187               | 306    |      |
| Iran                                | 2013-2014   | Isfahan Salt Study (ISS)                                                                                | Community                   | urban                | 6-18                                | 6-18  | 383                  | 400    | 383               | 400    |      |
| Iran                                | 2014-2015   | Childhood and Adolescence Surveillance and Prevention of Adult Noncommunicable Disease (CASPIAN)        | National                    | both                 | 7-18                                | 7-18  | 6974                 | 7177   | 6966              | 7164   |      |
| Iran                                | 2015        | Iranian School Measurement Database                                                                     | National                    | both                 | 6-18                                | 6-18  | 912041               | 910541 | 911344            | 909863 |      |
| Iran                                | 2016        | STEPS                                                                                                   | National                    | both                 | 18+                                 | 18+   | 3098                 | 2832   | 221               | 204    |      |
| Iran                                | 2016-2017   | Iranian Children and Adolescents Psychiatric Disorders (IRCAP) Survey                                   | National                    | both                 | 6-18                                | 6-18  | 13493                | 13071  | 13476             | 13049  |      |
| Iran                                | 2018-2019   | Prevalence of risk factors for cardiovascular disease among a rural population in eastern Iran          | Subnational                 | rural                | 18-69                               | 18-69 | 20                   | 32     | 2                 |        |      |
| Iran                                | 2016-2019   | The Khuzestan comprehensive health study: A platform for NCDs, blood borne and mental diseases research | Subnational                 | both                 | 20-65                               | 20-65 | 3786                 | 1910   |                   |        |      |
| Iraq                                | 2006        | STEPS                                                                                                   | National                    | both                 | 25-64                               | 25-64 | 948                  | 1046   |                   |        |      |
| Iraq                                | 2013-2014   | Qadir et al., Malays J Med Health Sci, 10(2):27-38, 2014                                                | Community                   | urban                | 13-17                               | 13-17 | 748                  | 832    | 748               | 832    |      |

| Country                        | Study years | Survey/study name/citation                                                                  | Level of representativeness | Rural, urban or both | Age range as in NCD-RisC database * |       | Sample size (height) |      | Sample size (BMI) |      | Note |
|--------------------------------|-------------|---------------------------------------------------------------------------------------------|-----------------------------|----------------------|-------------------------------------|-------|----------------------|------|-------------------|------|------|
|                                |             |                                                                                             |                             |                      | Female                              | Male  | Female               | Male | Female            | Male |      |
| Iraq                           | 2015        | STEPS                                                                                       | National                    | both                 | 18+                                 | 18+   | 556                  | 411  | 88                | 78   |      |
| Jordan                         | 1997        | DHS                                                                                         | National                    | both                 | 20-49                               |       | 1674                 |      |                   |      |      |
| Jordan                         | 2002        | DHS                                                                                         | National                    | both                 | 20-49                               |       | 1862                 |      |                   |      |      |
| Jordan                         | 2004        | Behavioural Risk Factor Surveillance Survey                                                 | National                    | rural                | 18+                                 | 18+   | 116                  | 57   | 14                | 12   |      |
| Jordan                         | 2007        | Behavioural Risk Factor Surveillance Survey                                                 | National                    | both                 | 18+                                 | 18+   | 85                   | 74   | 17                | 10   |      |
| Jordan                         | 2007        | DHS                                                                                         | National                    | both                 | 20-49                               |       | 1601                 |      |                   |      |      |
| Jordan                         | 2009        | Metabolic abnormalities and vitamin D study                                                 | National                    | both                 | 7+                                  | 7+    | 1295                 | 638  | 618               | 488  |      |
| Jordan                         | 2009        | DHS                                                                                         | National                    | both                 | 20-49                               |       | 1455                 |      |                   |      |      |
| Jordan                         | 2012        | DHS                                                                                         | National                    | both                 | 20-49                               |       | 2096                 |      |                   |      |      |
| Jordan                         | 2015-2016   | Zayed et al., BMC Public Health 16(1):1040, 2016                                            | Subnational                 | both                 | 6-17                                | 6-15  | 1333                 | 1075 | 1262              | 972  |      |
| Jordan                         | 2016-2017   | National Cardiovascular Diseases and Diabetes Study (NCDDS)                                 | National                    | both                 | 18+                                 | 18+   | 579                  | 154  | 120               | 33   |      |
| Jordan                         | 2017-2018   | DHS                                                                                         | National                    | both                 | 15-49                               |       | 2096                 |      |                   |      |      |
| Jordan                         | 2018-2019   | Anthropometric Indices of Obesity as Predictors of High Blood Pressure among Schoolchildren | Community                   | urban                | 10-14                               | 10-14 | 504                  | 284  | 504               | 284  |      |
| Jordan                         | 2019        | STEPS                                                                                       | National                    | both                 | 18-69                               | 18-69 | 790                  | 574  | 134               | 145  |      |
| Kuwait                         | 1993-1994   | al-Isa, Ann Nutr Metab 41(5):307-14, 1997                                                   | Community                   | both                 |                                     | 18+   |                      |      |                   | 210  |      |
| Kuwait                         | 2001        | Kuwait Nutrition Surveillance System                                                        | National                    | urban                | 5-19                                | 5-19  | 5391                 | 4523 | 5389              | 4520 |      |
| Kuwait                         | 2001        | Kuwait Nutrition Surveillance System                                                        | National                    | urban                | 20+                                 | 20+   | 915                  | 406  |                   |      |      |
| Kuwait                         | 2002        | Kuwait Nutrition Surveillance System                                                        | National                    | urban                | 5-19                                | 5-19  | 5239                 | 5519 | 5239              | 5517 |      |
| Kuwait                         | 2002        | Kuwait Nutrition Surveillance System                                                        | National                    | urban                | 20+                                 | 20+   | 825                  | 512  |                   |      |      |
| Kuwait                         | 2003        | Kuwait Nutrition Surveillance System                                                        | National                    | both                 | 5-19                                | 5-19  | 5132                 | 5179 | 5132              | 5179 |      |
| Kuwait                         | 2003        | Kuwait Nutrition Surveillance System                                                        | National                    | both                 | 20+                                 | 20+   | 409                  | 490  |                   |      |      |
| Kuwait                         | 2004        | Kuwait Nutrition Surveillance System                                                        | National                    | both                 | 5-19                                | 5-19  | 4880                 | 5021 | 4880              | 5021 |      |
| Kuwait                         | 2004        | Kuwait Nutrition Surveillance System                                                        | National                    | both                 | 20+                                 | 20+   | 532                  | 328  |                   |      |      |
| Kuwait                         | 2005        | Kuwait Nutrition Surveillance System                                                        | National                    | both                 | 5-19                                | 5-19  | 5391                 | 4523 | 5389              | 4520 |      |
| Kuwait                         | 2005        | Kuwait Nutrition Surveillance System                                                        | National                    | both                 | 20+                                 | 20+   | 388                  | 351  |                   |      |      |
| Kuwait                         | 2006        | Kuwait Nutrition Surveillance System                                                        | National                    | both                 | 5-19                                | 5-19  | 5069                 | 5261 | 5066              | 5259 |      |
| Kuwait                         | 2006        | Kuwait Nutrition Surveillance System                                                        | National                    | both                 | 20+                                 | 20+   | 531                  | 302  |                   |      |      |
| Kuwait                         | 2006        | STEPS                                                                                       | National                    | both                 | 20-64                               | 20-64 | 309                  | 222  |                   |      |      |
| Kuwait                         | 2007        | Kuwait Nutrition Surveillance System                                                        | National                    | both                 | 5-19                                | 5-19  | 5504                 | 5489 | 5502              | 5481 |      |
| Kuwait                         | 2007        | Kuwait Nutrition Surveillance System                                                        | National                    | both                 | 20+                                 | 20+   | 403                  | 405  |                   |      |      |
| Kuwait                         | 2008        | Kuwait Nutrition Surveillance System                                                        | National                    | both                 | 5-19                                | 5-19  | 5596                 | 5759 | 5595              | 5757 |      |
| Kuwait                         | 2008        | Kuwait Nutrition Surveillance System                                                        | National                    | both                 | 20+                                 | 20+   | 492                  | 416  |                   |      |      |
| Kuwait                         | 2009        | Kuwait Nutrition Surveillance System                                                        | National                    | both                 | 5-19                                | 5-19  | 5576                 | 5361 | 5574              | 5358 |      |
| Kuwait                         | 2008-2009   | National Nutrition Program for the State of Kuwait                                          | National                    | both                 | 5+                                  | 5+    | 402                  | 414  | 294               | 314  |      |
| Kuwait                         | 2008-2010   | Gulf Cooperation Council World Health Survey                                                | National                    | both                 | 18+                                 | 18+   | 528                  | 360  | 57                | 42   |      |
| Kuwait                         | 2009        | Kuwait Nutrition Surveillance System                                                        | National                    | both                 | 20+                                 | 20+   | 456                  | 341  |                   |      |      |
| Kuwait                         | 2011        | Global School-based Student Health Survey                                                   | National                    | both                 | 13-17                               | 13-17 | 1274                 | 1265 | 1274              | 1265 |      |
| Kuwait                         | 2011-2014   | Kuwait Diabetes Epidemiology Program                                                        | National                    | both                 | 18-82                               | 18-82 | 190                  | 213  | 5                 | 5    |      |
| Kuwait                         | 2014        | STEPS                                                                                       | National                    | both                 | 18-69                               | 18-69 | 692                  | 506  | 47                | 62   |      |
| Kuwait                         | 2015        | Global School-based Student Health Survey                                                   | National                    | both                 | 13-17                               | 13-17 | 1553                 | 1364 | 1553              | 1363 |      |
| Lebanon                        | 1997        | Obesity in Lebanon: National Survey                                                         | National                    | both                 | 5+                                  | 5+    | 624                  | 468  | 450               | 370  |      |
| Lebanon                        | 2008-2009   | STEPS                                                                                       | National                    | both                 | 5+                                  | 5+    | 885                  | 851  | 464               | 485  |      |
| Lebanon                        | 2017        | STEPS                                                                                       | National                    | both                 | 18-69                               | 18-69 | 123                  | 98   | 11                | 4    |      |
| Libya                          | 2009        | STEPS                                                                                       | National                    | both                 | 25-64                               | 25-64 | 273                  | 256  |                   |      |      |
| Morocco                        | 2003-2004   | DHS                                                                                         | National                    | both                 | 15-49                               |       | 8904                 |      | 3230              |      |      |
| Morocco                        | 2017        | STEPS                                                                                       | National                    | both                 | 18+                                 | 18+   | 651                  | 335  | 89                | 63   |      |
| Morocco                        | 2019-2020   | National Nutrition Survey                                                                   | National                    | both                 | 6-12                                | 6-12  | 591                  | 575  | 591               | 574  |      |
| Occupied Palestinian Territory | 1996-1998   | Ramallah study                                                                              | Community                   | both                 | 15-64                               | 15-64 | 487                  |      | 146               |      |      |
| Occupied Palestinian Territory | 1999-2000   | The First National Health and Nutrition Survey                                              | National                    | both                 | 18-64                               | 18-64 | 451                  | 399  | 62                | 47   |      |
| Occupied Palestinian Territory | 2010        | Global School-based Student Health Survey                                                   | National                    | both                 | 13-17                               | 13-17 | 1865                 | 1823 | 1865              | 1822 |      |
| Occupied Palestinian Territory | 2010        | STEPS                                                                                       | National                    | both                 | 15-64                               | 15-64 | 1153                 | 961  | 358               | 419  |      |
| Oman                           | 2008        | Gulf Cooperation Council World Health Survey                                                | National                    | both                 | 18+                                 | 18+   | 850                  | 882  | 129               | 134  |      |
| Oman                           | 2010        | Global School-based Student Health Survey                                                   | National                    | both                 | 13-17                               | 13-17 | 300                  | 251  | 300               | 251  |      |
| Oman                           | 2015        | Global School-based Student Health Survey                                                   | National                    | both                 | 13-17                               | 13-17 | 1551                 | 1330 | 1551              | 1330 |      |
| Oman                           | 2017        | STEPS                                                                                       | National                    | both                 | 15+                                 | 15+   | 813                  | 886  | 169               | 165  |      |
| Qatar                          | 2006        | World Health Survey                                                                         | National                    | both                 | 18+                                 | 18+   | 540                  | 399  | 60                | 67   |      |
| Qatar                          | 2011        | Global School-based Student Health Survey                                                   | National                    | both                 | 13                                  | 13    | 126                  | 102  | 126               | 102  |      |
| Qatar                          | 2012        | STEPS                                                                                       | National                    | both                 | 18-64                               | 18-64 | 399                  | 296  | 88                | 70   |      |
| Saudi Arabia                   | 1985-1988   | National Nutrition Survey                                                                   | National                    | both                 | 5-75                                | 5-75  | 2928                 | 2717 | 542               | 273  | 1    |
| Saudi Arabia                   | 1989-1994   | National Nutrition Survey                                                                   | National                    | both                 | 18-40                               | 18-40 |                      |      | 1905              | 1452 |      |
| Saudi Arabia                   | 1992-1995   | Saudi Health Information Survey                                                             | National                    | both                 | 14-50                               | 14-50 |                      |      | 2484              | 2018 |      |
| Saudi Arabia                   | 2005        | STEPS                                                                                       | National                    | both                 | 15-64                               | 15-64 | 1115                 | 982  |                   |      |      |
| Saudi Arabia                   | 2005        | El Mouzan et al., Ann Saudi Med 30(3):203-208, 2010                                         | National                    | both                 | 5-18                                | 5-18  |                      |      | 9519              | 9853 |      |
| Saudi Arabia                   | 2007        | Gulf Cooperation Council World Health Survey                                                | National                    | both                 | 18+                                 | 18+   | 1287                 | 1328 | 192               | 187  |      |
| Saudi Arabia                   | 2009-2010   | Arab Teens Lifestyle Study (ATLS)                                                           | Subnational                 | urban                | 14-19                               | 14-19 | 1479                 | 1384 | 1479              | 1384 |      |
| Saudi Arabia                   | 2011-2013   | Jeddah City Study                                                                           | Community                   | urban                | 5+                                  | 5+    | 431                  | 601  | 226               | 438  |      |

| Country                        | Study years | Survey/study name/citation                                                                                 | Level of representativeness | Rural, urban or both | Age range as in NCD-RisC database * |       | Sample size (height) |          | Sample size (BMI) |        | Note |
|--------------------------------|-------------|------------------------------------------------------------------------------------------------------------|-----------------------------|----------------------|-------------------------------------|-------|----------------------|----------|-------------------|--------|------|
|                                |             |                                                                                                            |                             |                      | Female                              | Male  | Female               | Male     | Female            | Male   |      |
| Saudi Arabia                   | 2011-2012   | Jeeluna Study- National Assessment of the Health Needs of Adolescents in Saudi Arabia                      | National                    | both                 | 12-19                               | 12-19 | 5796                 | 6245     | 5790              | 6234   |      |
| Saudi Arabia                   | 2013        | Saudi Health Information Survey                                                                            | National                    | both                 | 15+                                 | 15+   | 1937                 | 1721     | 526               | 654    |      |
| Tunisia                        | 1996-1997   | Tunisian National Nutrition Survey 1996-1997                                                               | National                    | both                 | 5+                                  | 5+    | 2227                 | 1614     | 1606              | 1411   |      |
| Tunisia                        | 2005        | Aounallah et al., Public Health 12(1):98, 2012                                                             | National                    | both                 | 15-19                               | 15-19 | 1566                 | 1290     | 1566              | 1290   |      |
| Tunisia                        | 2009-2010   | ObeMaghreb                                                                                                 | Subnational                 | urban                | 5-49                                | 5-49  | 1510                 | 1148     | 1001              | 911    |      |
| Turkey                         | 1998        | DHS                                                                                                        | National                    | both                 | 20-49                               |       | 1493                 |          |                   |        |      |
| Turkey                         | 2003        | Prevalence, awareness, treatment and control of hypertension in Turkey in 2003                             | National                    | both                 | 18+                                 | 18+   | 784                  | 526      | 129               | 102    |      |
| Turkey                         | 2003        | DHS                                                                                                        | National                    | both                 | 20-49                               |       | 1858                 |          |                   |        |      |
| Turkey                         | 2003-2005   | Prevalence of prehypertension and associated risk factors among Turkish adults: Trabzon Hypertension Study | Subnational                 | both                 | 20+                                 | 20+   | 699                  | 607      |                   |        |      |
| Turkey                         | 2008        | DHS                                                                                                        | National                    | both                 | 15-49                               |       | 2095                 |          |                   |        |      |
| Turkey                         | 2011        | Chronic Diseases and Risk Factors Survey in Turkey                                                         | National                    | both                 | 15+                                 | 15+   | 2542                 | 2320     | 843               | 899    |      |
| Turkey                         | 2009-2012   | Prevalence of diabetes and associated risk factors among adult population in Trabzon city                  | Subnational                 | both                 | 20+                                 | 20+   | 477                  | 314      |                   |        |      |
| Turkey                         | 2013        | Childhood Obesity Surveillance Initiative 3                                                                | National                    | both                 | 7-8                                 | 7-8   | 2475                 | 2483     | 2475              | 2483   |      |
| Turkey                         | 2013        | DHS                                                                                                        | National                    | both                 | 15-49                               |       | 3937                 |          | 1367              |        |      |
| Turkey                         | 2015-2016   | Childhood Obesity Surveillance Initiative 4                                                                | National                    | both                 | 6-7                                 | 6-7   | 5336                 | 5480     | 5336              | 5479   |      |
| Turkey                         | 2016-2017   | Erasmus plus KA2, Healthyland                                                                              | Community                   | urban                | 6                                   | 6     | 22                   | 29       | 22                | 29     |      |
| Turkey                         | 2017        | STEPS                                                                                                      | National                    | both                 | 15+                                 | 15+   | 612                  | 469      | 151               | 142    |      |
| Turkey                         | 2017-2018   | Erasmus plus KA2, Healthyland                                                                              | Community                   | urban                | 6                                   | 6     | 50                   | 50       | 50                | 50     |      |
| United Arab Emirates           | 2005        | Global School-based Student Health Survey                                                                  | National                    | both                 | 12-15                               | 12-15 | 6268                 | 5595     | 6268              | 5595   |      |
| United Arab Emirates           | 2009        | Gulf Cooperation Council World Health Survey                                                               | National                    | both                 | 18+                                 | 18+   | 182                  | 148      | 24                | 31     |      |
| United Arab Emirates           | 2010        | Global School-based Student Health Survey                                                                  | National                    | both                 | 13-17                               | 13-17 | 1257                 | 948      | 1257              | 948    |      |
| United Arab Emirates           | 2016        | Global School-based Student Health Survey                                                                  | National                    | both                 | 12-17                               | 12-17 | 2675                 | 2323     | 2674              | 2323   |      |
| United Arab Emirates           | 2017-2018   | STEPS                                                                                                      | National                    | both                 | 18+                                 | 18+   | 514                  | 368      | 43                | 36     |      |
| Yemen                          | 1997        | DHS                                                                                                        | National                    | both                 | 15-49                               |       | 1569                 |          |                   |        |      |
| Yemen                          | 2005-2006   | Yemen Household Budget Survey 2005-2006                                                                    | National                    | both                 | 5+                                  | 5+    | 2386                 | 2451     | 1733              | 1914   |      |
| Yemen                          | 2007-2009   | Hypertension and Diabetes in Yemen (HYDY)                                                                  | National                    | both                 | 6-70                                | 6-70  | 2705                 | 2632     | 1546              | 1558   |      |
| Yemen                          | 2013        | DHS                                                                                                        | National                    | both                 | 15-49                               |       | 15621                |          | 5930              |        |      |
| <b>East and southeast Asia</b> |             |                                                                                                            |                             |                      |                                     |       |                      |          |                   |        |      |
| <b>East Asia</b>               |             |                                                                                                            |                             |                      |                                     |       |                      |          |                   |        |      |
| China                          | 1985        | Chinese National Surveys on Students Constitution and Health                                               | National                    | both                 | 7-18                                | 7-18  | 136880               | 136878   |                   |        |      |
| China                          | 1989        | China Health and Nutrition Study                                                                           | National                    | both                 | 5-45                                | 5-45  | 167                  | 200      | 166               | 197    | 2    |
| China                          | 1991        | China Health and Nutrition Study                                                                           | National                    | both                 | 5+                                  | 5+    | 1684                 | 1746     | 1661              | 1730   | 2    |
| China                          | 1992        | China National Nutrition Survey                                                                            | National                    | both                 | 5+                                  | 5+    | 10379                | 11005    | 10380             | 11004  |      |
| China                          | 1993        | China Health and Nutrition Study                                                                           | National                    | both                 | 5+                                  | 5+    | 1523                 | 1699     | 1500              | 1677   | 2    |
| China                          | 1995        | Chinese National Surveys on Students Constitution and Health                                               | National                    | both                 | 7-18                                | 7-18  | 101772               | 103009   | 101772            | 103009 |      |
| China                          | 1997        | China Health and Nutrition Study                                                                           | National                    | both                 | 5+                                  | 5+    | 2223                 | 2418     | 1366              | 1532   | 2    |
| China                          | 2000        | China Health and Nutrition Study                                                                           | National                    | both                 | 5+                                  | 5+    | 2041                 | 2192     | 1277              | 1452   | 2    |
| China                          | 2000        | Chinese National Surveys on Students Constitution and Health                                               | National                    | both                 | 7-18                                | 7-18  | 108097               | 107997   | 108097            | 107997 |      |
| China                          | 1996-2003   | Wu et al., Osteoporos Int 15:751-59, 2004                                                                  | Community                   | urban                | 18+                                 |       |                      |          | 114               |        |      |
| China                          | 2002        | China National Nutrition and Health Survey                                                                 | National                    | both                 | 5+                                  | 5+    | 28161                | 29026    | 18713             | 20739  |      |
| China                          | 2004        | Beijing Child and Adolescent Metabolic Syndrome study                                                      | Community                   | both                 | 5-18                                | 5-18  | 10413                | 10564    | 10412             | 10562  |      |
| China                          | 2004        | China Health and Nutrition Study                                                                           | National                    | both                 | 5+                                  | 5+    | 1331                 | 1487     | 828               | 968    | 2    |
| China                          | 2005        | Chinese National Surveys on Students Constitution and Health                                               | National                    | both                 | 7-18                                | 7-18  | 116705               | 117598   | 116705            | 117598 |      |
| China                          | 2004-2005   | Xinjiang Children and Adolescent Survey                                                                    | Community                   | urban                | 6-18                                | 6-18  | 2240                 | 2035     | 2233              | 2030   |      |
| China                          | 2006        | China Health and Nutrition Study                                                                           | National                    | both                 | 5+                                  | 5+    | 1096                 | 1189     | 676               | 787    | 2    |
| China                          | 2005-2006   | Hong Kong Growth Survey                                                                                    | Community                   | urban                | 7-19                                | 7-19  | 7370                 | 7472     | 7370              | 7472   |      |
| China                          | 2007        | Beijing Child and Adolescent Metabolic Syndrome study                                                      | Community                   | urban                | 7-18                                | 7-18  | 664                  | 863      | 664               | 863    |      |
| China                          | 2009        | The 33 Chinese Communities Health Study (33CCHS)                                                           | Subnational                 | urban                | 18-74                               | 18-74 | 903                  | 1612     | 47                | 88     |      |
| China                          | 2009        | China Health and Nutrition Study                                                                           | National                    | both                 | 5+                                  | 5+    | 1080                 | 1170     | 602               | 740    | 2    |
| China                          | 2009        | The nutrition-based comprehensive intervention study on childhood obesity in China                         | Subnational                 | urban                | 6-11                                | 6-11  | 4269                 | 4495     | 4269              | 4495   |      |
| China                          | 2010        | China Chronic Disease and Risk Factors Surveillance (CCDRFS)                                               | National                    | both                 | 18+                                 | 18+   | 7443                 | 7204     | 1254              | 1229   |      |
| China                          | 2009-2010   | China National Survey of Chronic Kidney Disease                                                            | National                    | both                 | 18+                                 | 18+   | 2717                 | 2651     | 92                | 123    |      |
| China                          | 2010        | Chinese National Surveys on Students Constitution and Health                                               | National                    | both                 | 7-18                                | 7-18  | 107612               | 107611   | 107612            | 107611 |      |
| China                          | 2009-2011   | The FAMILY Cohort                                                                                          | Community                   | urban                | 15+                                 | 15+   | 2010                 | 1984     | 780               | 897    |      |
| China                          | 2011        | Beijing Childhood Eye Study                                                                                | Community                   | both                 | 7-18                                | 7-18  | 7301                 | 6886     | 6967              | 6686   |      |
| China                          | 2011        | Beijing Children Eye Study                                                                                 | Community                   | both                 | 5-13                                | 5-13  | 275                  | 304      | 261               | 289    |      |
| China                          | 2011        | China Health and Nutrition Study                                                                           | National                    | both                 | 5+                                  | 5+    | 1506                 | 1457     | 881               | 943    | 2    |
| China                          | 2012        | Beijing Children Eye Study                                                                                 | Community                   | both                 | 5-13                                | 5-13  | 255                  | 283      | 249               | 282    |      |
| China                          | 2012        | Beijing Eye High School Students Study                                                                     | Community                   | both                 | 16-18                               | 16-18 | 2407                 | 2103     | 2340              | 2088   |      |
| China                          | 2011-2013   | International Study of Childhood Obesity, Lifestyle and the Environment (ISCOLE)                           | Community                   | urban                | 9-11                                | 9-11  | 259                  | 293      | 258               | 293    |      |
| China                          | 2012        | Shandong Children Study                                                                                    | Community                   | both                 | 5-18                                | 5-18  | 2766                 | 3086     | 2766              | 3086   |      |
| China                          | 2010-2014   | National Free Preconception Health Examination Project                                                     | National                    | rural                |                                     | 20-64 |                      | 10576140 |                   |        |      |
| China                          | 2013        | Gobi Desert Children Eye Study                                                                             | Community                   | urban                | 6-21                                | 6-21  | 761                  | 800      | 761               | 797    |      |
| China                          | 2011-2014   | The FAMILY Cohort                                                                                          | Community                   | urban                | 15+                                 | 15+   | 1048                 | 1029     | 325               | 350    |      |
| China                          | 2012-2013   | The Kailuan Study                                                                                          | Community                   | urban                | 18+                                 | 18+   | 1260                 | 6475     |                   | 39     |      |
| China                          | 2012-2013   | The Seven Northeastern Cities (SNEC) Study                                                                 | Subnational                 | urban                | 5-17                                | 5-17  | 4579                 | 4770     | 4577              | 4769   |      |

| Country               | Study years | Survey/study name/citation                                                                                                 | Level of representativeness | Rural, urban or both | Age range as in NCD-RisC database * |       | Sample size (height) |        | Sample size (BMI) |        | Note |
|-----------------------|-------------|----------------------------------------------------------------------------------------------------------------------------|-----------------------------|----------------------|-------------------------------------|-------|----------------------|--------|-------------------|--------|------|
|                       |             |                                                                                                                            |                             |                      | Female                              | Male  | Female               | Male   | Female            | Male   |      |
| China                 | 2014        | Chinese National Surveys on Students Constitution and Health                                                               | National                    | both                 | 7-18                                | 7-18  | 107138               | 107216 | 107138            | 107216 |      |
| China                 | 2014        | Shanghai Municipal Surveys on Students Constitution and Health                                                             | Community                   | both                 | 7-18                                | 7-18  | 7665                 | 7758   | 7665              | 7758   |      |
| China                 | 2015        | China Health and Nutrition Study                                                                                           | National                    | both                 | 5+                                  | 5+    | 966                  | 1149   | 608               | 665    | 2    |
| China                 | 2014-2015   | The Kailuan Study                                                                                                          | Community                   | urban                | 18+                                 | 18+   | 880                  | 6170   |                   | 2      |      |
| China                 | 2016        | Greater Beijing School Children Myopia Study                                                                               | Subnational                 | both                 | 6-18                                | 6-18  | 16516                | 17259  | 16516             | 17257  |      |
| China                 | 2016-2018   | Smart device usage, lifestyles behaviors, physical fitness, and eye problems: A prospective study in Hong Kong adolescents | Community                   | urban                | 7-15                                | 7-15  | 741                  | 703    | 741               | 703    |      |
| Taiwan                | 1993-1996   | Nutrition and Health Survey in Taiwan                                                                                      | National                    | both                 | 5+                                  | 5+    | 1614                 | 1543   | 1610              | 1536   |      |
| Taiwan                | 2001-2002   | Nutrition and Health Survey in Taiwan                                                                                      | National                    | both                 | 6-12                                | 6-12  | 1139                 | 1334   | 1139              | 1334   |      |
| Taiwan                | 2005-2008   | Nutrition and Health Survey in Taiwan                                                                                      | National                    | both                 | 19+                                 | 19+   | 174                  | 151    | 7                 | 13     |      |
| Taiwan                | 2007        | Taiwanese Survey on Hypertension, Hyperglycemia and Hyperlipidemia                                                         | National                    | both                 | 20+                                 | 20+   | 381                  | 368    |                   |        |      |
| Taiwan                | 2010        | Nutrition and Health Survey in Taiwan                                                                                      | National                    | both                 | 13-15                               | 13-15 | 927                  | 852    | 927               | 852    |      |
| Taiwan                | 2011        | Nutrition and Health Survey in Taiwan                                                                                      | National                    | both                 | 16-18                               | 16-18 | 591                  | 580    | 591               | 580    |      |
| Taiwan                | 2012        | Global School-based Student Health Survey                                                                                  | National                    | both                 | 13-17                               | 13-17 | 2927                 | 2998   | 2927              | 2998   |      |
| Taiwan                | 2012        | Nutrition and Health Survey in Taiwan                                                                                      | National                    | both                 | 7-12                                | 7-12  | 499                  | 510    | 499               | 510    |      |
| Taiwan                | 2013-2016   | Nutrition and Health Survey in Taiwan                                                                                      | National                    | both                 | 5+                                  | 5+    | 1311                 | 1226   | 1105              | 1056   |      |
| Taiwan                | 2019        | Global School-based Student Health Survey                                                                                  | National                    | both                 | 15-17                               | 15-17 | 1854                 | 1701   | 1854              | 1701   |      |
| <i>Southeast Asia</i> |             |                                                                                                                            |                             |                      |                                     |       |                      |        |                   |        |      |
| Brunei Darussalam     | 2010-2011   | National Health And Nutritional Status Survey (NHANSS)                                                                     | National                    | both                 | 5-75                                | 5-75  | 578                  | 578    | 349               | 347    |      |
| Brunei Darussalam     | 2014        | Global School-based Student Health Survey                                                                                  | National                    | both                 | 12-17                               | 12-17 | 1326                 | 1145   | 1326              | 1145   |      |
| Brunei Darussalam     | 2015-2016   | National Non-Communicable Diseases Survey (NNCDS)                                                                          | National                    | both                 | 18-69                               | 18-69 | 283                  | 221    | 48                | 51     |      |
| Brunei Darussalam     | 2019        | Global School-based Student Health Survey                                                                                  | National                    | both                 | 12-17                               | 12-17 | 1153                 | 1061   | 1152              | 1061   |      |
| Cambodia              | 2000        | DHS                                                                                                                        | National                    | both                 | 15-49                               |       | 3676                 |        | 1620              |        |      |
| Cambodia              | 2005        | DHS                                                                                                                        | National                    | both                 | 15-49                               |       | 4462                 |        | 1765              |        |      |
| Cambodia              | 2010        | DHS                                                                                                                        | National                    | both                 | 15-49                               |       | 5157                 |        | 1894              |        |      |
| Cambodia              | 2010        | STEPS                                                                                                                      | National                    | both                 | 25-64                               | 25-64 | 504                  | 303    |                   |        |      |
| Cambodia              | 2014        | DHS                                                                                                                        | National                    | both                 | 15-49                               |       | 5901                 |        | 1842              |        |      |
| Indonesia             | 1993-1994   | Indonesian Family Life Surveys                                                                                             | National                    | both                 | 5+                                  | 5+    | 3308                 | 3224   | 3275              | 3216   |      |
| Indonesia             | 1997-1998   | Indonesian Family Life Surveys                                                                                             | National                    | both                 | 5+                                  | 5+    | 7312                 | 6734   | 5006              | 4960   |      |
| Indonesia             | 2000-2001   | Indonesian Family Life Surveys                                                                                             | National                    | both                 | 5+                                  | 5+    | 9134                 | 8637   | 5561              | 5580   |      |
| Indonesia             | 2003        | A genetic-ecological study of the risk factors for lifestyle-related diseases in Oceanian populations, Study A             | Community                   | rural                | 18-79                               | 18-79 | 44                   | 23     | 13                | 3      |      |
| Indonesia             | 2003        | A genetic-ecological study of the risk factors for lifestyle-related diseases in Oceanian populations, Study B             | Community                   | rural                | 18-79                               | 18-79 | 58                   | 45     | 12                | 13     |      |
| Indonesia             | 2007-2008   | Indonesian Family Life Surveys                                                                                             | National                    | both                 | 5+                                  | 5+    | 10037                | 9395   | 5630              | 5779   |      |
| Indonesia             | 2011        | SEANUTS                                                                                                                    | National                    | both                 | 5-12                                | 5-12  | 1380                 | 1363   | 1380              | 1363   |      |
| Indonesia             | 2013        | Population Health Basic Health Research 2013 (Riskesdas 2013)                                                              | National                    | both                 | 5-19                                | 5-19  | 146291               | 155850 | 145926            | 155332 |      |
| Indonesia             | 2013        | Population Health Basic Health Research 2013 (Riskesdas 2013)                                                              | National                    | both                 | 20+                                 | 20+   | 66157                | 60693  |                   |        |      |
| Indonesia             | 2015        | Global School-based Student Health Survey                                                                                  | National                    | both                 | 13-17                               | 13-17 | 4688                 | 3845   | 4688              | 3845   |      |
| Indonesia             | 2014-2015   | Indonesian Family Life Surveys                                                                                             | National                    | both                 | 5+                                  | 5+    | 10772                | 10008  | 6639              | 6814   |      |
| Indonesia             | 2018        | Indonesian Basic Health Survey 2018                                                                                        | National                    | both                 | 15+                                 | 15+   | 2815                 | 1611   | 837               | 641    |      |
| Lao PDR               | 2006        | Multiple Indicator Cluster Survey 3                                                                                        | National                    | both                 | 15-49                               |       | 409                  |        | 164               |        |      |
| Lao PDR               | 2008        | STEPS                                                                                                                      | Community                   | both                 | 25-64                               | 25-64 | 330                  | 173    |                   |        |      |
| Lao PDR               | 2013        | STEPS                                                                                                                      | National                    | both                 | 18-64                               | 18-64 | 430                  | 228    | 53                | 38     |      |
| Malaysia              | 1996        | National Health and Morbidity Survey (NHMS)                                                                                | National                    | both                 | 18+                                 | 18+   | 5419                 | 4451   | 927               | 730    |      |
| Malaysia              | 2002-2003   | Malaysian Adult Nutrition Survey                                                                                           | National                    | both                 | 18-59                               | 18-59 | 418                  | 501    | 62                | 73     |      |
| Malaysia              | 2004        | Rampal et al., Public Health 122(1):11-8, 2008                                                                             | National                    | both                 | 15+                                 | 15+   | 2981                 | 2230   | 1229              | 976    |      |
| Malaysia              | 2005        | STEPS                                                                                                                      | National                    | both                 | 25-64                               | 25-64 | 443                  | 438    |                   |        |      |
| Malaysia              | 2006        | National Health and Morbidity Survey (NHMS)                                                                                | National                    | both                 | 5+                                  | 5+    | 12391                | 12090  | 8540              | 8767   |      |
| Malaysia              | 2008        | National Iodine Deficiency Disorder (IDD) Survey                                                                           | National                    | both                 | 7-10                                | 7-10  | 8660                 | 9391   | 8659              | 9388   |      |
| Malaysia              | 2008        | Metabolic Syndrome Study in Malaysia                                                                                       | National                    | both                 | 18+                                 | 18+   | 317                  | 214    | 54                | 31     |      |
| Malaysia              | 2011        | National Health and Morbidity Survey (NHMS)                                                                                | National                    | both                 | 5+                                  | 5+    | 2253                 | 2342   | 364               | 389    |      |
| Malaysia              | 2010-2011   | SEANUTS                                                                                                                    | National                    | both                 | 5-12                                | 5-12  | 1352                 | 1306   | 1352              | 1306   |      |
| Malaysia              | 2012        | Malaysian School-Based Health Survey                                                                                       | National                    | both                 | 9-17                                | 9-17  | 19625                | 20224  | 19616             | 20214  |      |
| Malaysia              | 2012-2013   | Petaling District                                                                                                          | Subnational                 | urban                | 12-17                               | 12-17 | 1364                 | 882    | 1364              | 882    |      |
| Malaysia              | 2013-2014   | Batang Padang District                                                                                                     | Subnational                 | both                 | 12-17                               | 12-17 | 3319                 | 2928   | 3319              | 2928   |      |
| Malaysia              | 2014        | Malaysian Adult Nutrition Survey                                                                                           | National                    | both                 | 18-59                               | 18-59 | 377                  | 391    | 44                | 79     |      |
| Malaysia              | 2015        | National Health and Morbidity Survey (NHMS)                                                                                | National                    | both                 | 5+                                  | 5+    | 5483                 | 5556   | 3660              | 3628   |      |
| Malaysia              | 2019        | National Health and Morbidity Survey                                                                                       | National                    | both                 | 5+                                  | 5+    | 2639                 | 2680   | 1744              | 1765   |      |
| Maldives              | 2001        | Multiple Indicator Cluster Survey                                                                                          | National                    | both                 | 15-50                               |       | 578                  |        |                   |        |      |
| Maldives              | 2004        | STEPS                                                                                                                      | Subnational                 | urban                | 25-64                               | 25-64 | 311                  | 292    |                   |        |      |
| Maldives              | 2009        | Global School-based Student Health Survey                                                                                  | National                    | both                 |                                     | 13-17 |                      | 807    |                   | 806    |      |
| Maldives              | 2009        | DHS                                                                                                                        | National                    | both                 | 20-49                               |       | 2299                 |        |                   |        |      |
| Maldives              | 2011        | STEPS                                                                                                                      | Subnational                 | urban                | 15-64                               | 15-64 | 395                  | 312    | 113               | 131    |      |
| Maldives              | 2014        | Global School-based Student Health Survey                                                                                  | National                    | both                 |                                     | 13-17 |                      | 931    |                   | 931    |      |
| Maldives              | 2016-2017   | DHS                                                                                                                        | National                    | both                 | 15-49                               | 15-49 | 3298                 | 2032   | 934               | 851    |      |
| Myanmar               | 2003-2004   | STEPS                                                                                                                      | Subnational                 | both                 | 25-74                               | 25-74 | 186                  | 156    |                   |        |      |
| Myanmar               | 2009        | STEPS                                                                                                                      | National                    | both                 | 15-64                               | 15-64 | 1025                 | 720    | 262               | 176    |      |
| Myanmar               | 2011        | Underweight prevalence among young adults from rural areas, Salin Township, Magwe Region                                   | Community                   | rural                | 15-35                               | 15-35 | 183                  | 140    | 60                | 51     |      |

| Country                         | Study years | Survey/study name/citation                                                                             | Level of representativeness | Rural, urban or both | Age range as in NCD-RisC database * |       | Sample size (height) |       | Sample size (BMI) |       | Note |
|---------------------------------|-------------|--------------------------------------------------------------------------------------------------------|-----------------------------|----------------------|-------------------------------------|-------|----------------------|-------|-------------------|-------|------|
|                                 |             |                                                                                                        |                             |                      | Female                              | Male  | Female               | Male  | Female            | Male  |      |
| Myanmar                         | 2014        | STEPS                                                                                                  | National                    | both                 | 25-64                               | 25-64 | 492                  | 314   |                   |       |      |
| Myanmar                         | 2013-2014   | STEPS, Yangon                                                                                          | Subnational                 | both                 | 25-74                               | 25-74 | 67                   | 60    |                   |       |      |
| Myanmar                         | 2015-2016   | DHS                                                                                                    | National                    | both                 | 15-49                               |       | 5510                 |       | 1777              |       |      |
| Philippines                     | 1991-1992   | Cebu Longitudinal Health and Nutrition Survey 1991 Child Follow-up                                     | Community                   | both                 | 8                                   | 8     | 1076                 | 1202  | 1076              | 1202  |      |
| Philippines                     | 1994-1995   | Cebu Longitudinal Health and Nutrition Survey 1994-1995 Mother Follow-up                               | Community                   | both                 | 15-59                               |       | 250                  |       | 244               |       |      |
| Philippines                     | 1998-1999   | Cebu Longitudinal Health and Nutrition Survey 1998-1999 Child Follow-up                                | Community                   | both                 | 14-16                               | 14-16 | 994                  | 1099  | 994               | 1099  |      |
| Philippines                     | 1998-1999   | Cebu Longitudinal Health and Nutrition Survey 1998-1999 Mother Follow-up                               | Community                   | both                 | 15-59                               |       | 3                    |       |                   |       |      |
| Philippines                     | 2002        | Cebu Longitudinal Health and Nutrition Survey 2002 Child Follow-up                                     | Community                   | both                 | 17-19                               | 17-19 | 961                  | 1087  | 907               | 1087  |      |
| Philippines                     | 2003        | Global School-based Student Health Survey                                                              | National                    | both                 | 13                                  |       | 291                  |       | 291               |       |      |
| Philippines                     | 2003        | 6th National Nutrition Survey                                                                          | National                    | both                 | 5+                                  | 5+    | 6578                 | 6323  | 4350              | 4494  |      |
| Philippines                     | 2005        | Cebu Longitudinal Health and Nutrition Survey 2005 Child Follow-up                                     | Community                   | both                 | 20-22                               | 20-22 | 903                  | 1006  |                   |       |      |
| Philippines                     | 2007        | Global School-based Student Health Survey                                                              | National                    | both                 | 13                                  |       | 254                  |       | 254               |       |      |
| Philippines                     | 2007        | Cebu Longitudinal Health and Nutrition Survey 2007 Child Follow-up                                     | Community                   | both                 | 23-24                               | 23-24 | 816                  | 937   |                   |       |      |
| Philippines                     | 2008        | 7th National Nutrition Survey                                                                          | National                    | both                 | 5+                                  | 5+    | 33476                | 37432 | 26584             | 28859 |      |
| Philippines                     | 2009        | Cebu Longitudinal Health and Nutrition Survey 2009 Child Follow-up                                     | Community                   | both                 | 24-26                               | 24-26 | 796                  | 864   |                   |       |      |
| Philippines                     | 2011        | Global School-based Student Health Survey                                                              | National                    | both                 | 13                                  |       | 540                  |       | 540               |       |      |
| Philippines                     | 2011        | 2011 Updating of Nutritional Status of Filipino Children                                               | National                    | both                 | 5+                                  | 5+    | 35989                | 37670 | 26983             | 29544 |      |
| Philippines                     | 2013-2014   | 8th National Nutrition Survey                                                                          | National                    | both                 | 5+                                  | 5+    | 30662                | 31628 | 22865             | 24303 |      |
| Philippines                     | 2015        | Global School-based Student Health Survey                                                              | National                    | both                 | 13-17                               |       | 3730                 |       | 3730              |       |      |
| Philippines                     | 2015        | 2015 Updating of Nutritional Status of Filipino Children and Other Population Groups                   | National                    | both                 | 5+                                  | 5+    | 37206                | 38158 | 27178             | 28876 |      |
| Philippines                     | 2019        | Global School-based Student Health Survey                                                              | National                    | both                 | 12-16                               | 12-16 | 4290                 | 3573  | 4286              | 3571  |      |
| Thailand                        | 1991        | Thailand National Health Examination Survey I                                                          | National                    | both                 | 5+                                  | 5+    | 3236                 | 3202  | 3228              | 3197  |      |
| Thailand                        | 1997        | Thailand National Health Examination Survey II                                                         | National                    | both                 | 5-59                                | 5-59  | 3451                 | 3276  | 2944              | 2987  |      |
| Thailand                        | 2004        | Thailand National Health Examination Survey III                                                        | National                    | both                 | 15+                                 | 15+   | 1827                 | 2144  | 502               | 702   |      |
| Thailand                        | 2003-2004   | The Fifth National Nutrition Survey of Thailand                                                        | National                    | both                 | 19+                                 | 19+   | 635                  | 265   |                   |       |      |
| Thailand                        | 2009        | Thailand National Health Examination Survey IV                                                         | National                    | both                 | 5+                                  | 5+    | 945                  | 925   | 3842              | 3874  |      |
| Thailand                        | 2011        | SEANUTS                                                                                                | National                    | both                 | 5-12                                | 5-12  | 939                  | 922   | 939               | 922   |      |
| Thailand                        | 2014        | Thailand National Health Examination Survey V                                                          | National                    | both                 | 10+                                 | 10+   | 2631                 | 2356  | 1811              | 1744  |      |
| Thailand                        | 2015        | Global School-based Student Health Survey                                                              | National                    | both                 | 12-17                               | 12-17 | 3106                 | 2240  | 3106              | 2240  |      |
| Thailand                        | 2019-2020   | Thailand National Health Examination Survey VI                                                         | National                    | both                 | 10+                                 | 10+   | 3524                 | 3129  | 2103              | 2098  |      |
| Timor-Leste                     | 2009-2010   | DHS                                                                                                    | National                    | both                 | 15-49                               |       | 7262                 |       | 3065              |       |      |
| Timor-Leste                     | 2013        | Child measurements in Ossu and in Natarbora, Timor Leste                                               | Subnational                 | rural                | 5-19                                | 5-19  | 239                  | 245   | 239               | 245   |      |
| Timor-Leste                     | 2014        | STEPS                                                                                                  | National                    | both                 | 18-69                               | 18-69 | 404                  | 220   | 70                | 29    |      |
| Timor-Leste                     | 2016        | DHS                                                                                                    | National                    | both                 | 15-49                               | 15-59 | 7010                 | 2199  | 3019              | 1037  |      |
| Timor-Leste                     | 2018        | Child measurements in Ossu and in Natarbora, Timor Leste                                               | Subnational                 | rural                | 5-19                                | 5-19  | 246                  | 234   | 246               | 234   |      |
| Timor-Leste                     | 2018        | Child measurements in Ossu and in Natarbora, Timor Leste                                               | Subnational                 | rural                | 5-19                                | 5-19  | 133                  | 99    | 132               | 97    |      |
| Viet Nam                        | 1987-1989   | General Nutrition Survey                                                                               | National                    | both                 | 15-70                               | 15-70 |                      |       | 2303              | 2236  | 1    |
| Viet Nam                        | 1992-1993   | Living Standard Survey                                                                                 | National                    | both                 | 5+                                  | 5+    | 4128                 | 4172  | 4107              | 4172  |      |
| Viet Nam                        | 1997-1998   | Living Standard Survey                                                                                 | National                    | both                 | 5+                                  | 5+    | 6866                 | 6954  | 4908              | 5059  |      |
| Viet Nam                        | 2000        | National Nutrition Survey                                                                              | National                    | both                 | 20+                                 | 20+   | 2347                 | 2455  |                   |       |      |
| Viet Nam                        | 2001-2002   | Viet Nam National Health Survey 2001-2002                                                              | National                    | both                 | 5+                                  | 5+    | 36661                | 36636 | 25748             | 27137 |      |
| Viet Nam                        | 2001-2003   | The National Epidemiological Survey on Hypertension and Its Risk Factors (North)                       | Subnational                 | both                 | 25-74                               | 25-74 | 427                  | 265   |                   |       |      |
| Viet Nam                        | 2003-2004   | The Survey on Heart Failure and Its Risk Factors                                                       | Subnational                 | both                 | 25-74                               | 25-74 | 291                  | 195   |                   |       |      |
| Viet Nam                        | 2004        | The Hypertension Management Programme in Rural Communes (Hanoi)                                        | Community                   | rural                | 25-74                               | 25-74 | 85                   | 61    |                   |       |      |
| Viet Nam                        | 2005        | National Adult Overweight Survey                                                                       | National                    | both                 | 25-64                               | 25-64 | 1039                 | 1038  |                   |       |      |
| Viet Nam                        | 2005        | The Survey on Non-Communicable Disease Risk Factors                                                    | Subnational                 | both                 | 25-74                               | 25-74 | 104                  | 105   |                   |       |      |
| Viet Nam                        | 2005        | Non-communicable disease risk factors in Ho Chi Minh City                                              | Community                   | urban                | 25-64                               | 25-64 | 101                  | 110   |                   |       |      |
| Viet Nam                        | 2006        | Qualitative and quantitative assessment of nutritional status and lifestyles of Vietnamese adolescents | Subnational                 | both                 | 15-19                               | 15-19 | 697                  | 506   | 697               | 506   |      |
| Viet Nam                        | 2006        | The Hypertension Management Programme in Rural Communes (Bavi)                                         | Community                   | rural                | 25-74                               | 25-74 | 45                   | 17    |                   |       |      |
| Viet Nam                        | 2007        | Global School-based Student Health Survey                                                              | National                    | both                 | 12-15                               | 12-15 | 996                  | 697   | 995               | 697   |      |
| Viet Nam                        | 2007        | The Hypertension Management Programme in Rural Communes (Phu Phuong)                                   | Community                   | rural                | 25-74                               | 25-74 | 52                   | 15    |                   |       |      |
| Viet Nam                        | 2006-2008   | The National Epidemiological Survey on Hypertension and Its Risk Factors (South)                       | Subnational                 | both                 | 25-74                               | 25-74 | 177                  | 115   |                   |       |      |
| Viet Nam                        | 2008-2009   | The Survey on Diabetes and Its Risk Factors                                                            | Subnational                 | both                 | 25+                                 | 25+   | 83                   | 44    |                   |       |      |
| Viet Nam                        | 2009        | The Hypertension Management Programme in Rural Communes (Phu Cuong)                                    | Community                   | rural                | 25-74                               | 25-74 | 42                   | 9     |                   |       |      |
| Viet Nam                        | 2009        | STEPS                                                                                                  | National                    | both                 | 25-64                               | 25-64 | 830                  | 634   |                   |       |      |
| Viet Nam                        | 2009-2010   | Vietnam National Nutrition Survey 2009-2010                                                            | National                    | both                 | 5+                                  | 5+    | 8444                 | 8067  | 5160              | 5210  |      |
| Viet Nam                        | 2011        | SEANUTS                                                                                                | National                    | both                 | 5-11                                | 5-11  | 980                  | 975   | 980               | 975   |      |
| Viet Nam                        | 2013        | Global School-based Student Health Survey                                                              | National                    | both                 | 13-17                               | 13-17 | 1578                 | 1368  | 1578              | 1368  |      |
| Viet Nam                        | 2015        | STEPS                                                                                                  | National                    | both                 | 18-69                               | 18-69 | 251                  | 220   | 19                | 26    |      |
| Viet Nam                        | 2019        | Global School-based Student Health Survey                                                              | National                    | both                 | 13-18                               | 13-18 | 4118                 | 3572  | 4117              | 3572  |      |
| <b>High-income Asia Pacific</b> |             |                                                                                                        |                             |                      |                                     |       |                      |       |                   |       |      |
| Japan                           | 1976        | National Nutrition Survey                                                                              | National                    | both                 | 5+                                  | 5+    | 228                  | 204   |                   |       |      |
| Japan                           | 1977        | National Nutrition Survey                                                                              | National                    | both                 | 5+                                  | 5+    | 326                  | 358   |                   |       |      |
| Japan                           | 1978        | National Nutrition Survey                                                                              | National                    | both                 | 5+                                  | 5+    | 570                  | 608   |                   |       |      |
| Japan                           | 1979        | National Nutrition Survey                                                                              | National                    | both                 | 5+                                  | 5+    | 770                  | 784   |                   |       |      |
| Japan                           | 1980        | National Cardiovascular Survey                                                                         | National                    | both                 | 5+                                  | 5+    | 872                  | 938   |                   |       |      |

| Country | Study years | Survey/study name/citation                                   | Level of representativeness | Rural, urban or both | Age range as in NCD-RisC database * |       | Sample size (height) |        | Sample size (BMI) |        | Note |
|---------|-------------|--------------------------------------------------------------|-----------------------------|----------------------|-------------------------------------|-------|----------------------|--------|-------------------|--------|------|
|         |             |                                                              |                             |                      | Female                              | Male  | Female               | Male   | Female            | Male   |      |
| Japan   | 1981        | National Nutrition Survey                                    | National                    | both                 | 5+                                  | 5+    | 976                  | 956    |                   |        |      |
| Japan   | 1982        | National Nutrition Survey                                    | National                    | both                 | 5+                                  | 5+    | 1235                 | 1264   |                   |        |      |
| Japan   | 1983        | National Nutrition Survey                                    | National                    | both                 | 5+                                  | 5+    | 1333                 | 1398   |                   |        |      |
| Japan   | 1984        | National Nutrition Survey                                    | National                    | both                 | 5+                                  | 5+    | 1314                 | 1346   |                   |        |      |
| Japan   | 1985        | National Nutrition Survey                                    | National                    | both                 | 5+                                  | 5+    | 1551                 | 1659   |                   |        |      |
| Japan   | 1986        | National Nutrition Survey                                    | National                    | both                 | 5+                                  | 5+    | 1688                 | 1765   |                   |        |      |
| Japan   | 1987        | National Nutrition Survey                                    | National                    | both                 | 5+                                  | 5+    | 1573                 | 1602   | 1845              | 1863   | 1    |
| Japan   | 1988        | National Nutrition Survey                                    | National                    | both                 | 5+                                  | 5+    | 1650                 | 1759   | 1838              | 1912   | 1    |
| Japan   | 1989        | National Nutrition Survey                                    | National                    | both                 | 5+                                  | 5+    | 1380                 | 1534   | 1453              | 1607   | 1    |
| Japan   | 1990        | National Nutrition Survey and National Cardiovascular Survey | National                    | both                 | 5+                                  | 5+    | 1527                 | 1657   | 1526              | 1655   |      |
| Japan   | 1991        | National Nutrition Survey                                    | National                    | both                 | 5+                                  | 5+    | 1451                 | 1548   | 1450              | 1546   |      |
| Japan   | 1992        | National Nutrition Survey                                    | National                    | both                 | 5+                                  | 5+    | 1340                 | 1429   | 1337              | 1425   |      |
| Japan   | 1993        | Iwata kids health study                                      | Community                   | urban                | 10                                  | 10    | 485                  | 513    | 485               | 513    |      |
| Japan   | 1993        | National Nutrition Survey                                    | National                    | both                 | 5+                                  | 5+    | 1399                 | 1451   | 1398              | 1450   |      |
| Japan   | 1994        | Iwata kids health study                                      | Community                   | urban                | 10                                  | 10    | 567                  | 569    | 567               | 569    |      |
| Japan   | 1994        | National Nutrition Survey                                    | National                    | both                 | 5+                                  | 5+    | 1236                 | 1285   | 1235              | 1281   |      |
| Japan   | 1995        | Iwata kids health study                                      | Community                   | urban                | 10                                  | 10    | 567                  | 524    | 567               | 524    |      |
| Japan   | 1995        | National Nutrition Survey                                    | National                    | both                 | 5+                                  | 5+    | 1213                 | 1311   | 1211              | 1307   |      |
| Japan   | 1996        | Iwata kids health study                                      | Community                   | urban                | 10                                  | 10    | 480                  | 552    | 480               | 552    |      |
| Japan   | 1996        | National Nutrition Survey                                    | National                    | both                 | 5+                                  | 5+    | 1871                 | 1739   | 1090              | 1104   |      |
| Japan   | 1997        | Iwata kids health study                                      | Community                   | urban                | 10                                  | 10    | 537                  | 506    | 537               | 506    |      |
| Japan   | 1997        | National Nutrition Survey                                    | National                    | both                 | 5+                                  | 5+    | 1809                 | 1669   | 1023              | 1065   |      |
| Japan   | 1998        | Iwata kids health study                                      | Community                   | urban                | 10                                  | 10    | 464                  | 527    | 464               | 527    |      |
| Japan   | 1998        | National Nutrition Survey                                    | National                    | both                 | 5+                                  | 5+    | 1740                 | 1684   | 1043              | 1090   |      |
| Japan   | 1999        | Iwata kids health study                                      | Community                   | urban                | 10                                  | 10    | 463                  | 468    | 463               | 468    |      |
| Japan   | 1999        | National Nutrition Survey                                    | National                    | both                 | 5+                                  | 5+    | 1498                 | 1321   | 816               | 835    |      |
| Japan   | 2000        | Iwata kids health study                                      | Community                   | urban                | 10                                  | 10    | 401                  | 440    | 401               | 440    |      |
| Japan   | 2000        | National Nutrition Survey and National Cardiovascular Survey | National                    | both                 | 5+                                  | 5+    | 1480                 | 1422   | 925               | 902    |      |
| Japan   | 2001        | Iwata kids health study                                      | Community                   | urban                | 10                                  | 10    | 414                  | 452    | 414               | 452    |      |
| Japan   | 2001        | National Nutrition Survey                                    | National                    | both                 | 5+                                  | 5+    | 1417                 | 1331   | 862               | 913    |      |
| Japan   | 2001        | The Japan Association of Health Service Database             | Subnational                 | both                 | 20+                                 | 20+   | 186355               | 247264 |                   |        |      |
| Japan   | 2002        | Iwata kids health study                                      | Community                   | urban                | 10                                  | 10    | 398                  | 496    | 398               | 496    |      |
| Japan   | 2002        | National Nutrition Survey                                    | National                    | both                 | 5+                                  | 5+    | 1194                 | 1101   | 736               | 719    |      |
| Japan   | 2003        | Iwata kids health study                                      | Community                   | urban                | 10                                  | 10    | 399                  | 415    | 399               | 415    |      |
| Japan   | 2003        | National Health and Nutrition Survey                         | National                    | both                 | 5+                                  | 5+    | 1157                 | 1061   | 703               | 674    |      |
| Japan   | 2004        | Iwata kids health study                                      | Community                   | urban                | 10                                  | 10    | 412                  | 463    | 412               | 463    |      |
| Japan   | 2004        | National Health and Nutrition Survey                         | National                    | both                 | 5+                                  | 5+    | 912                  | 941    | 545               | 642    |      |
| Japan   | 2005        | Iwata kids health study                                      | Community                   | urban                | 10                                  | 10    | 420                  | 476    | 420               | 476    |      |
| Japan   | 2005        | National Health and Nutrition Survey                         | National                    | both                 | 5+                                  | 5+    | 808                  | 754    | 512               | 480    |      |
| Japan   | 2006        | Iwata kids health study                                      | Community                   | urban                | 10                                  | 10    | 391                  | 417    | 391               | 417    |      |
| Japan   | 2006        | National Health and Nutrition Survey                         | National                    | both                 | 5+                                  | 5+    | 918                  | 891    | 584               | 615    |      |
| Japan   | 2007        | Fukuroid kids health study                                   | Community                   | urban                | 13-14                               | 13-14 | 372                  | 395    | 372               | 395    |      |
| Japan   | 2007        | Iwata kids health study                                      | Community                   | urban                | 10                                  | 10    | 394                  | 439    | 394               | 439    |      |
| Japan   | 2007        | National Health and Nutrition Survey                         | National                    | both                 | 5+                                  | 5+    | 902                  | 831    | 594               | 589    |      |
| Japan   | 2008        | Fukuroid kids health study                                   | Community                   | urban                | 13-14                               | 13-14 | 346                  | 381    | 346               | 381    |      |
| Japan   | 2008        | Iwata kids health study                                      | Community                   | urban                | 10                                  | 10    | 417                  | 406    | 417               | 406    |      |
| Japan   | 2008        | MEXT School Health Statistics                                | National                    | both                 | 5-17                                | 5-17  | 326966               | 326407 | 326957            | 326405 |      |
| Japan   | 2008        | National Health and Nutrition Survey                         | National                    | both                 | 5+                                  | 5+    | 784                  | 767    | 488               | 504    |      |
| Japan   | 2009        | Fukuroid kids health study                                   | Community                   | urban                | 13-14                               | 13-14 | 357                  | 388    | 357               | 388    |      |
| Japan   | 2009        | MEXT School Health Statistics                                | National                    | both                 | 5-17                                | 5-17  | 327108               | 326529 | 327098            | 326525 |      |
| Japan   | 2009        | National Health and Nutrition Survey                         | National                    | both                 | 5+                                  | 5+    | 871                  | 809    | 574               | 563    |      |
| Japan   | 2010        | Fukuroid kids health study                                   | Community                   | urban                | 13-14                               | 13-14 | 387                  | 360    | 387               | 360    |      |
| Japan   | 2010        | MEXT School Health Statistics                                | National                    | both                 | 5-17                                | 5-17  | 326414               | 326517 | 326401            | 326509 |      |
| Japan   | 2010        | National Health and Nutrition Survey                         | National                    | both                 | 5+                                  | 5+    | 719                  | 705    | 458               | 486    |      |
| Japan   | 2011        | Fukuroid kids health study                                   | Community                   | urban                | 13-14                               | 13-14 | 369                  | 402    | 369               | 402    |      |
| Japan   | 2011        | MEXT School Health Statistics                                | National                    | both                 | 5-17                                | 5-17  | 306389               | 305274 | 306383            | 305270 |      |
| Japan   | 2011        | National Health and Nutrition Survey                         | National                    | both                 | 5+                                  | 5+    | 723                  | 642    | 457               | 435    |      |
| Japan   | 2011        | The Tokyo Health Service Association Database                | Community                   | urban                | 20+                                 | 20+   | 17931                | 15068  |                   |        |      |
| Japan   | 2012        | Fukuroid kids health study                                   | Community                   | urban                | 13-14                               | 13-14 | 353                  | 432    | 353               | 432    |      |
| Japan   | 2012        | MEXT School Health Statistics                                | National                    | both                 | 5-17                                | 5-17  | 326577               | 326527 | 326572            | 326524 |      |
| Japan   | 2012        | National Health and Nutrition Survey                         | National                    | both                 | 5+                                  | 5+    | 2485                 | 2380   | 1602              | 1610   |      |
| Japan   | 2013        | Awaji Child Health Study                                     | Community                   | urban                | 10-14                               | 10-14 | 203                  | 198    | 203               | 198    |      |
| Japan   | 2013        | Fukuroid kids health study                                   | Community                   | urban                | 13-14                               | 13-14 | 404                  | 387    | 404               | 387    |      |
| Japan   | 2013        | MEXT School Health Statistics                                | National                    | both                 | 5-17                                | 5-17  | 327581               | 327926 | 327578            | 327923 |      |
| Japan   | 2013        | National Health and Nutrition Survey                         | National                    | both                 | 5+                                  | 5+    | 695                  | 719    | 438               | 458    |      |
| Japan   | 2014        | Awaji Child Health Study                                     | Community                   | urban                | 10-14                               | 10-14 | 218                  | 229    | 218               | 229    |      |

| Country     | Study years | Survey/study name/citation                                                    | Level of representativeness | Rural, urban or both | Age range as in NCD-RisC database * |       | Sample size (height) |        | Sample size (BMI) |        | Note |
|-------------|-------------|-------------------------------------------------------------------------------|-----------------------------|----------------------|-------------------------------------|-------|----------------------|--------|-------------------|--------|------|
|             |             |                                                                               |                             |                      | Female                              | Male  | Female               | Male   | Female            | Male   |      |
| Japan       | 2014        | MEXT School Health Statistics                                                 | National                    | both                 | 5-17                                | 5-17  | 326885               | 327062 | 326884            | 327062 |      |
| Japan       | 2014        | National Health and Nutrition Survey                                          | National                    | both                 | 5+                                  | 5+    | 677                  | 640    | 440               | 460    |      |
| Japan       | 2014-2015   | Nagaoka Health Screening                                                      | Community                   | both                 | 20-89                               | 20-89 | 473                  | 294    |                   |        |      |
| Japan       | 2015        | Awaji Child Health Study                                                      | Community                   | urban                | 10-14                               | 10-14 | 228                  | 230    | 228               | 230    |      |
| Japan       | 2015        | MEXT School Health Statistics                                                 | National                    | both                 | 5-17                                | 5-17  | 327212               | 326383 | 327210            | 326382 |      |
| Japan       | 2015        | National Health and Nutrition Survey                                          | National                    | both                 | 5+                                  | 5+    | 631                  | 609    | 417               | 434    |      |
| Japan       | 2016        | MEXT School Health Statistics                                                 | National                    | both                 | 5-17                                | 5-17  | 334447               | 334735 | 334444            | 334734 |      |
| Japan       | 2016        | National Health and Nutrition Survey                                          | National                    | both                 | 5+                                  | 5+    | 1926                 | 1929   | 1269              | 1346   |      |
| Japan       | 2017        | MEXT School Health Statistics                                                 | National                    | both                 | 5-17                                | 5-17  | 333725               | 333185 | 333723            | 333184 |      |
| Japan       | 2017        | National Health and Nutrition Survey                                          | National                    | both                 | 5+                                  | 5+    | 513                  | 494    | 345               | 327    |      |
| Japan       | 2017        | The Tokyo Health Service Association Database                                 | Community                   | urban                | 20+                                 | 20+   | 14319                | 11117  |                   |        |      |
| Japan       | 2018        | MEXT School Health Statistics                                                 | National                    | both                 | 5-17                                | 5-17  | 336954               | 337022 | 336953            | 337022 |      |
| Japan       | 2018        | National Health and Nutrition Survey                                          | National                    | both                 | 5+                                  | 5+    | 558                  | 562    | 369               | 388    |      |
| Japan       | 2019        | MEXT School Health Statistics                                                 | National                    | both                 | 5-17                                | 5-17  | 333546               | 332232 | 333546            | 332231 |      |
| Japan       | 2019        | National Health and Nutrition Survey                                          | National                    | both                 | 5+                                  | 5+    | 429                  | 453    | 286               | 317    |      |
| Japan       | 2020        | MEXT School Health Statistics                                                 | National                    | both                 | 5-17                                | 5-17  | 333858               | 333405 | 333857            | 333405 |      |
| Singapore   | 2004-2007   | Singapore Cardiovascular Cohort Study and Singapore Prospective Study Program | National                    | both                 | 24+                                 | 24+   | 126                  | 90     |                   |        |      |
| Singapore   | 2012-2013   | Singapore Health Study 2012                                                   | National                    | both                 | 18-79                               | 18-79 | 218                  | 224    | 44                | 36     |      |
| Singapore   | 2014-2015   | Singapore Health 2                                                            | National                    | both                 | 18-80                               | 18-80 | 138                  | 115    | 21                | 15     |      |
| South Korea | 1984        | Kim et al., Am J Phys Anthropol 136:230-6, 2008                               | National                    | both                 | 5-20                                | 5-20  | 26029                | 27035  |                   |        |      |
| South Korea | 1998        | Korea National Health and Nutrition Examination Survey                        | National                    | both                 | 10+                                 | 10+   | 1726                 | 1576   | 891               | 917    |      |
| South Korea | 1997-1998   | National Anthropometric Survey in Korean Children and Adolescents             | National                    | both                 | 5-19                                | 5-19  | 26469                | 29318  | 26469             | 29318  |      |
| South Korea | 1999        | The South Korean Conception Database                                          | National                    | both                 |                                     | 19    |                      | 401721 |                   | 401721 |      |
| South Korea | 2000        | The South Korean Conception Database                                          | National                    | both                 |                                     | 19    |                      | 402758 |                   | 402758 |      |
| South Korea | 2001        | The South Korean Conception Database                                          | National                    | both                 |                                     | 19    |                      | 398653 |                   | 398653 |      |
| South Korea | 2001        | Korea National Health and Nutrition Examination Survey                        | National                    | both                 | 5+                                  | 5+    | 1796                 | 1751   | 1163              | 1286   |      |
| South Korea | 2002        | The South Korean Conception Database                                          | National                    | both                 |                                     | 19    |                      | 367024 |                   | 367024 |      |
| South Korea | 2003        | The South Korean Conception Database                                          | National                    | both                 |                                     | 19    |                      | 329626 |                   | 329626 |      |
| South Korea | 2004        | The South Korean Conception Database                                          | National                    | both                 |                                     | 19    |                      | 323001 |                   | 323001 |      |
| South Korea | 2005        | The South Korean Conception Database                                          | National                    | both                 |                                     | 19    |                      | 313378 |                   | 313378 |      |
| South Korea | 2005        | Korea National Health and Nutrition Examination Survey                        | National                    | both                 | 5+                                  | 5+    | 1202                 | 1131   | 800               | 858    |      |
| South Korea | 2005        | National Anthropometric Survey in Korean Children and Adolescents             | National                    | both                 | 5-19                                | 5-19  | 39197                | 41723  | 39200             | 41727  |      |
| South Korea | 2006        | The South Korean Conception Database                                          | National                    | both                 |                                     | 19    |                      | 302587 |                   | 302587 |      |
| South Korea | 2007        | The South Korean Conception Database                                          | National                    | both                 |                                     | 19    |                      | 312795 |                   | 312795 |      |
| South Korea | 2007        | Korea National Health and Nutrition Examination Survey                        | National                    | both                 | 5+                                  | 5+    | 642                  | 633    | 460               | 496    |      |
| South Korea | 2008        | The South Korean Conception Database                                          | National                    | both                 |                                     | 19    |                      | 312919 |                   | 312919 |      |
| South Korea | 2008        | Korea National Health and Nutrition Examination Survey                        | National                    | both                 | 5+                                  | 5+    | 1450                 | 1386   | 956               | 1056   |      |
| South Korea | 2009        | The South Korean Conception Database                                          | National                    | both                 |                                     | 19    |                      | 324818 |                   | 324818 |      |
| South Korea | 2009        | Korea National Health and Nutrition Examination Survey                        | National                    | both                 | 5+                                  | 5+    | 1531                 | 1524   | 1008              | 1083   |      |
| South Korea | 2009        | Korea National School Health Examination Survey (KNSHES)                      | National                    | both                 | 6-20                                | 6-20  | 89897                | 104042 | 89881             | 103997 |      |
| South Korea | 2010        | The South Korean Conception Database                                          | National                    | both                 |                                     | 19    |                      | 347249 |                   | 347249 |      |
| South Korea | 2007-2012   | JS High-School Study                                                          | Community                   | rural                | 14-17                               | 14-17 | 508                  | 553    | 508               | 553    |      |
| South Korea | 2010        | Korea National Health and Nutrition Examination Survey                        | National                    | both                 | 5+                                  | 5+    | 1226                 | 1178   | 802               | 897    |      |
| South Korea | 2010        | Korea National School Health Examination Survey (KNSHES)                      | National                    | both                 | 6-20                                | 6-20  | 86244                | 99965  | 86226             | 99944  |      |
| South Korea | 2011        | The South Korean Conception Database                                          | National                    | both                 |                                     | 19    |                      | 364982 |                   | 364982 |      |
| South Korea | 2011        | Korea National Health and Nutrition Examination Survey                        | National                    | both                 | 5+                                  | 5+    | 1063                 | 1021   | 700               | 751    |      |
| South Korea | 2011        | Korea National School Health Examination Survey (KNSHES)                      | National                    | both                 | 6-20                                | 6-20  | 83059                | 97377  | 83046             | 97363  |      |
| South Korea | 2012        | The South Korean Conception Database                                          | National                    | both                 |                                     | 19    |                      | 361009 |                   | 361009 |      |
| South Korea | 2012        | Korea National Health and Nutrition Examination Survey                        | National                    | both                 | 5+                                  | 5+    | 982                  | 960    | 619               | 721    |      |
| South Korea | 2012        | Korea National School Health Examination Survey (KNSHES)                      | National                    | both                 | 6-20                                | 6-20  | 42009                | 45075  | 42005             | 45066  |      |
| South Korea | 2013        | The South Korean Conception Database                                          | National                    | both                 |                                     | 19    |                      | 363914 |                   | 363914 |      |
| South Korea | 2013        | Korea National Health and Nutrition Examination Survey                        | National                    | both                 | 5+                                  | 5+    | 1071                 | 1051   | 702               | 770    |      |
| South Korea | 2013        | Korea National School Health Examination Survey (KNSHES)                      | National                    | both                 | 6-20                                | 6-20  | 40791                | 43685  | 40785             | 43675  |      |
| South Korea | 2014        | The South Korean Conception Database                                          | National                    | both                 |                                     | 19    |                      | 363597 |                   | 363597 |      |
| South Korea | 2014        | Korea National Health and Nutrition Examination Survey                        | National                    | both                 | 5+                                  | 5+    | 895                  | 845    | 554               | 621    |      |
| South Korea | 2014        | Korea National School Health Examination Survey (KNSHES)                      | National                    | both                 | 6-20                                | 6-20  | 39991                | 42580  | 39987             | 42570  |      |
| South Korea | 2015        | The South Korean Conception Database                                          | National                    | both                 |                                     | 19    |                      | 350518 |                   | 350518 |      |
| South Korea | 2015        | Korea National Health and Nutrition Examination Survey                        | National                    | both                 | 5+                                  | 5+    | 853                  | 909    | 539               | 612    |      |
| South Korea | 2015        | Korea National School Health Examination Survey (KNSHES)                      | National                    | both                 | 6-20                                | 6-20  | 41654                | 43152  | 41645             | 43141  |      |
| South Korea | 2016        | The South Korean Conception Database                                          | National                    | both                 |                                     | 19    |                      | 339410 |                   | 339410 |      |
| South Korea | 2016        | Korea National Health and Nutrition Examination Survey                        | National                    | both                 | 5+                                  | 5+    | 997                  | 951    | 635               | 675    |      |
| South Korea | 2016        | Korea National School Health Examination Survey (KNSHES)                      | National                    | both                 | 6-20                                | 6-20  | 40635                | 42245  | 40631             | 42242  |      |
| South Korea | 2017        | The South Korean Conception Database                                          | National                    | both                 |                                     | 19    |                      | 323457 |                   | 323457 |      |
| South Korea | 2017        | Korea National Health and Nutrition Examination Survey                        | National                    | both                 | 5+                                  | 5+    | 963                  | 941    | 608               | 623    |      |
| South Korea | 2018        | Korea National Health and Nutrition Examination Survey                        | National                    | both                 | 5+                                  | 5+    | 938                  | 915    | 562               | 590    |      |
| South Korea | 2019        | Korea National Health and Nutrition Examination Survey                        | National                    | both                 | 5+                                  | 5+    | 905                  | 984    | 576               | 622    |      |

| Country                                       | Study years | Survey/study name/citation                                                       | Level of representativeness | Rural, urban or both | Age range as in NCD-RisC database * |       | Sample size (height) |      | Sample size (BMI) |      | Note |
|-----------------------------------------------|-------------|----------------------------------------------------------------------------------|-----------------------------|----------------------|-------------------------------------|-------|----------------------|------|-------------------|------|------|
|                                               |             |                                                                                  |                             |                      | Female                              | Male  | Female               | Male | Female            | Male |      |
| South Korea                                   | 2020        | Korea National Health and Nutrition Examination Survey                           | National                    | both                 | 5+                                  | 5+    | 815                  | 924  | 449               | 545  |      |
| <b>High-income western</b>                    |             |                                                                                  |                             |                      |                                     |       |                      |      |                   |      |      |
| <i>High-income English-speaking countries</i> |             |                                                                                  |                             |                      |                                     |       |                      |      |                   |      |      |
| Australia                                     | 1985        | Australian Council for Health, Physical Education and Recreation survey          | National                    | both                 | 7-12                                | 7-12  | 702                  | 707  |                   |      |      |
| Australia                                     | 1995        | National Nutrition Survey 1995                                                   | National                    | both                 | 5+                                  | 5+    | 1175                 | 1237 | 1171              | 1236 |      |
| Australia                                     | 1996        | The Nepean Longitudinal Cohort Study                                             | Community                   | urban                | 7-8                                 | 7-8   | 215                  | 221  | 215               | 221  |      |
| Australia                                     | 1999-2000   | The Australian Diabetes, Obesity and Lifestyle Study 1999-2000                   | National                    | both                 | 25+                                 | 25+   | 319                  | 263  |                   |      |      |
| Australia                                     | 1999-2003   | North West Adelaide Health Study                                                 | Community                   | urban                | 18+                                 | 18+   | 225                  | 236  | 37                | 31   |      |
| Australia                                     | 2004        | The Longitudinal Study of Australian Children, K cohort (child)                  | National                    | both                 | 5                                   | 5     | 429                  | 424  | 429               | 424  |      |
| Australia                                     | 2004        | The Nepean Longitudinal Cohort Study                                             | Community                   | urban                | 14-15                               | 14-15 | 150                  | 143  | 149               | 143  |      |
| Australia                                     | 2004-2006   | North West Adelaide Health Study                                                 | Community                   | urban                | 20+                                 | 20+   | 62                   | 77   |                   |      |      |
| Australia                                     | 2006        | The Longitudinal Study of Australian Children, K cohort (child)                  | National                    | both                 | 6-7                                 | 6-7   | 2160                 | 2246 | 2152              | 2242 |      |
| Australia                                     | 2007        | Children's Nutrition and Physical Activity Survey                                | National                    | both                 | 5-16                                | 5-16  | 1652                 | 1626 | 1649              | 1623 |      |
| Australia                                     | 2008        | The Longitudinal Study of Australian Children, B cohort (infant)                 | National                    | both                 | 5                                   | 5     | 512                  | 508  | 511               | 508  |      |
| Australia                                     | 2008        | The Longitudinal Study of Australian Children, K cohort (child)                  | National                    | both                 | 8-9                                 | 8-9   | 2020                 | 2123 | 2018              | 2120 |      |
| Australia                                     | 2007-2008   | National Health Survey                                                           | National                    | both                 | 18+                                 | 18+   | 951                  | 970  | 136               | 148  |      |
| Australia                                     | 2008-2010   | North West Adelaide Health Study                                                 | Community                   | urban                | 24+                                 | 24+   | 23                   | 27   |                   |      |      |
| Australia                                     | 2010        | The Longitudinal Study of Australian Children, B cohort (infant)                 | National                    | both                 | 6-7                                 | 6-7   | 2019                 | 2142 | 2011              | 2137 |      |
| Australia                                     | 2010        | The Longitudinal Study of Australian Children, K cohort (child)                  | National                    | both                 | 10-11                               | 10-11 | 1943                 | 2044 | 1940              | 2042 |      |
| Australia                                     | 2011-2013   | Australian Health Survey                                                         | National                    | both                 | 5+                                  | 5+    | 3934                 | 3920 | 2386              | 2451 | 3    |
| Australia                                     | 2011-2013   | International Study of Childhood Obesity, Lifestyle and the Environment (ISCOLE) | Community                   | urban                | 9-11                                | 9-11  | 285                  | 243  | 285               | 243  |      |
| Australia                                     | 2012        | The Longitudinal Study of Australian Children, B cohort (infant)                 | National                    | both                 | 8-9                                 | 8-9   | 1952                 | 2053 | 1946              | 2041 |      |
| Australia                                     | 2012        | The Longitudinal Study of Australian Children, K cohort (child)                  | National                    | both                 | 12-13                               | 12-13 | 1882                 | 1963 | 1850              | 1948 |      |
| Australia                                     | 2014        | The Longitudinal Study of Australian Children, B cohort (infant)                 | National                    | both                 | 10-11                               | 10-11 | 1763                 | 1848 | 1742              | 1829 |      |
| Australia                                     | 2014        | The Longitudinal Study of Australian Children, K cohort (child)                  | National                    | both                 | 14-15                               | 14-15 | 1634                 | 1709 | 1581              | 1694 |      |
| Australia                                     | 2014-2015   | National Health Survey                                                           | National                    | both                 | 5+                                  | 5+    | 2687                 | 2770 | 1673              | 1824 |      |
| Australia                                     | 2016        | The Longitudinal Study of Australian Children, B cohort (infant)                 | National                    | both                 | 12-13                               | 12-13 | 1560                 | 1647 | 1529              | 1638 |      |
| Australia                                     | 2016        | The Longitudinal Study of Australian Children, K cohort (child)                  | National                    | both                 | 16-17                               | 16-17 | 1427                 | 1484 | 1380              | 1477 |      |
| Australia                                     | 2018        | The Longitudinal Study of Australian Children, B cohort (infant)                 | National                    | both                 | 14-15                               | 14-15 | 1433                 | 1532 | 1403              | 1523 |      |
| Australia                                     | 2018        | The Longitudinal Study of Australian Children, K cohort (child)                  | National                    | both                 | 18-19                               | 18-19 | 1269                 | 1310 | 1233              | 1304 |      |
| Australia                                     | 2017-2018   | National Health Survey                                                           | National                    | both                 | 18+                                 | 18+   | 1203                 | 1116 | 166               | 155  |      |
| Canada                                        | 1981        | Canada Fitness Survey                                                            | National                    | both                 | 7-64                                | 7-64  | 758                  | 838  |                   |      |      |
| Canada                                        | 1986-1992   | Canada Heart Health Survey                                                       | National                    | both                 | 18-74                               | 18-74 | 142                  | 110  | 309               | 300  | 1    |
| Canada                                        | 2004-2005   | Canadian Multicentre Osteoporosis Study (CaMos) - Youth baseline                 | Subnational                 | both                 | 16-24                               | 16-24 | 520                  | 471  | 262               | 242  |      |
| Canada                                        | 2006-2008   | Canadian Multicentre Osteoporosis Study (CaMos) - Youth Year 2 follow-up         | Subnational                 | both                 | 17-27                               | 17-27 | 383                  | 331  | 110               | 93   |      |
| Canada                                        | 2007-2009   | Canadian Health Measures Survey, Cycle 1                                         | National                    | both                 | 6-79                                | 6-79  | 1284                 | 1280 | 1028              | 1053 |      |
| Canada                                        | 2009-2011   | Canadian Health Measures Survey, Cycle 2                                         | National                    | both                 | 5-79                                | 5-79  | 1394                 | 1402 | 1148              | 1189 |      |
| Canada                                        | 2011-2013   | International Study of Childhood Obesity, Lifestyle and the Environment (ISCOLE) | Community                   | urban                | 9-11                                | 9-11  | 328                  | 239  | 327               | 238  |      |
| Canada                                        | 2012-2013   | Canadian Health Measures Survey, Cycle 3                                         | National                    | both                 | 5-79                                | 5-79  | 1277                 | 1289 | 1095              | 1106 |      |
| Canada                                        | 2014-2015   | Canadian Health Measures Survey, Cycle 4                                         | National                    | both                 | 5-79                                | 5-79  | 1297                 | 1297 | 1116              | 1131 |      |
| Canada                                        | 2016-2017   | Canadian Health Measures Survey, Cycle 5                                         | National                    | both                 | 5-79                                | 5-79  | 1271                 | 1296 | 1124              | 1140 |      |
| Canada                                        | 2018-2019   | Canadian Health Measures Survey, Cycle 6                                         | National                    | both                 | 5-79                                | 5-79  | 1282                 | 1245 | 1124              | 1090 |      |
| Ireland                                       | 1998        | Survey of Lifestyle, Attitudes and Nutritional in Ireland 1998                   | National                    | both                 | 18+                                 | 18+   | 46                   | 25   | 6                 |      |      |
| Ireland                                       | 2002        | Survey of Lifestyle, Attitudes and Nutritional in Ireland 2002                   | National                    | both                 | 18+                                 | 18+   | 32                   | 18   | 6                 |      |      |
| Ireland                                       | 2003-2004   | National Children's Food Survey                                                  | National                    | both                 | 5-12                                | 5-12  | 301                  | 293  | 301               | 293  |      |
| Ireland                                       | 2005-2006   | National Teens Food Survey                                                       | National                    | both                 | 13-17                               | 13-17 | 218                  | 223  | 216               | 224  |      |
| Ireland                                       | 2006-2007   | Survey of Lifestyle, Attitudes and Nutritional in Ireland 2006-2007              | National                    | both                 | 18+                                 | 18+   | 171                  | 162  | 28                | 27   |      |
| Ireland                                       | 2008        | Childhood Obesity Surveillance Initiative 1                                      | National                    | both                 | 7                                   | 7     | 1285                 | 1098 | 1285              | 1098 |      |
| Ireland                                       | 2007-2008   | Growing Up in Ireland - Child Cohort                                             | National                    | both                 | 9                                   | 9     | 4112                 | 3901 | 4101              | 3891 | 4    |
| Ireland                                       | 2008-2010   | National Adult Nutrition Survey                                                  | National                    | both                 | 18+                                 | 18+   | 168                  | 191  | 19                | 35   |      |
| Ireland                                       | 2010        | Murtagh et al., <i>Pediatr Exerc Sci</i> 25(2):300-7, 2013                       | Community                   | rural                | 7-12                                | 7-12  | 11                   | 20   | 11                | 20   |      |
| Ireland                                       | 2010        | Murtagh et al., <i>Pediatr Exerc Sci</i> 25(2):300-7, 2013                       | Community                   | rural                | 7-12                                | 7-12  | 19                   | 19   | 19                | 19   |      |
| Ireland                                       | 2010        | Murtagh et al., <i>Pediatr Exerc Sci</i> 25(2):300-7, 2013                       | Community                   | rural                | 7-12                                | 7-12  | 12                   | 14   | 12                | 14   |      |
| Ireland                                       | 2010        | Murtagh et al., <i>Pediatr Exerc Sci</i> 25(2):300-7, 2013                       | Community                   | rural                | 7-12                                | 7-12  | 21                   | 16   | 21                | 16   |      |
| Ireland                                       | 2010        | Childhood Obesity Surveillance Initiative 2                                      | National                    | both                 | 6-9                                 | 6-9   | 1533                 | 1452 | 1533              | 1452 |      |
| Ireland                                       | 2011-2012   | Growing Up in Ireland - Child Cohort                                             | National                    | both                 | 13                                  | 13    | 3706                 | 3550 | 3661              | 3537 | 4    |
| Ireland                                       | 2012-2013   | Childhood Obesity Surveillance Initiative 3                                      | National                    | both                 | 6-9                                 | 6-9   | 1054                 | 1087 | 1054              | 1087 |      |
| Ireland                                       | 2013        | Growing Up in Ireland - Infant Cohort                                            | National                    | both                 | 5                                   | 5     | 4379                 | 4493 | 4372              | 4482 | 4    |
| Ireland                                       | 2015        | Active Classrooms Study                                                          | Community                   | both                 | 8-11                                | 8-11  | 120                  | 123  | 120               | 123  |      |
| Ireland                                       | 2015-2016   | Growing Up in Ireland - Child Cohort                                             | National                    | both                 | 18                                  | 18    | 595                  | 556  | 583               | 551  | 4    |
| Ireland                                       | 2013-2016   | Project Spraoil                                                                  | Community                   | both                 | 5-11                                | 5-11  | 427                  | 472  | 427               | 472  |      |
| Ireland                                       | 2015-2016   | Childhood Obesity Surveillance Initiative 4                                      | National                    | both                 | 6-10                                | 6-10  | 1681                 | 1441 | 1679              | 1441 |      |
| Ireland                                       | 2016        | Growing Up in Ireland - Infant Cohort                                            | National                    | both                 | 7-8                                 | 7-8   | 1921                 | 2016 | 1921              | 2016 | 4    |
| Ireland                                       | 2017-2018   | Growing Up in Ireland - Infant Cohort                                            | National                    | both                 | 9                                   | 9     | 3906                 | 3945 | 3877              | 3925 | 4    |
| Ireland                                       | 2017-2018   | National Children's Food Survey II                                               | National                    | both                 | 5-12                                | 5-12  | 298                  | 298  | 298               | 298  |      |
| Ireland                                       | 2018-2019   | Childhood Obesity Surveillance Initiative 5                                      | National                    | both                 | 6-12                                | 6-12  | 2768                 | 2793 | 2768              | 2793 |      |



| Country        | Study years | Survey/study name/citation                                 | Level of representativeness | Rural, urban or both | Age range as in NCD-RisC database * |       | Sample size (height) |        | Sample size (BMI) |        | Note |
|----------------|-------------|------------------------------------------------------------|-----------------------------|----------------------|-------------------------------------|-------|----------------------|--------|-------------------|--------|------|
|                |             |                                                            |                             |                      | Female                              | Male  | Female               | Male   | Female            | Male   |      |
| Ireland        | 2018-2019   | Growing Up in Ireland - Child Cohort                       | National                    | both                 | 20                                  | 20    | 2270                 | 2094   |                   |        | 4    |
| Ireland        | 2019-2020   | National Teens' Food Survey II                             | National                    | both                 | 13-18                               | 13-18 | 215                  | 211    | 214               | 211    |      |
| New Zealand    | 1989        | The Life in New Zealand Survey                             | National                    | both                 | 15+                                 | 15+   | 98                   | 87     | 104               | 97     | 1    |
| New Zealand    | 1990-1993   | Williams, N Z Med J 113(1114):308-11, 2000                 | Community                   | both                 | 18-21                               | 18-21 |                      |        | 417               | 450    |      |
| New Zealand    | 1996-1997   | National Nutrition Survey                                  | National                    | both                 | 15+                                 | 15+   | 587                  | 383    | 156               | 128    |      |
| New Zealand    | 2002        | National Children's Nutrition Survey                       | National                    | both                 | 5-14                                | 5-14  | 1487                 | 1566   | 1484              | 1564   |      |
| New Zealand    | 2002-2003   | New Zealand Health Survey                                  | National                    | both                 | 15+                                 | 15+   | 1381                 | 935    | 325               | 293    |      |
| New Zealand    | 2006-2007   | New Zealand Health Survey                                  | National                    | both                 | 5+                                  | 5+    | 2844                 | 2685   | 1901              | 2014   |      |
| New Zealand    | 2008-2009   | New Zealand Adult Nutrition Survey                         | National                    | both                 | 15+                                 | 15+   | 709                  | 573    | 404               | 339    |      |
| New Zealand    | 2011-2012   | New Zealand Health Survey                                  | National                    | both                 | 5+                                  | 5+    | 2190                 | 2154   | 1406              | 1511   |      |
| New Zealand    | 2012-2013   | New Zealand Health Survey                                  | National                    | both                 | 5+                                  | 5+    | 2426                 | 2301   | 1452              | 1573   |      |
| New Zealand    | 2013-2014   | New Zealand Health Survey                                  | National                    | both                 | 5+                                  | 5+    | 2661                 | 2491   | 1644              | 1681   |      |
| New Zealand    | 2014-2015   | New Zealand Health Survey                                  | National                    | both                 | 5+                                  | 5+    | 2768                 | 2580   | 1745              | 1775   |      |
| New Zealand    | 2015-2016   | New Zealand Health Survey                                  | National                    | both                 | 5+                                  | 5+    | 2603                 | 2649   | 1603              | 1816   |      |
| New Zealand    | 2016-2017   | New Zealand Health Survey                                  | National                    | both                 | 5+                                  | 5+    | 2511                 | 2433   | 1562              | 1682   |      |
| New Zealand    | 2017-2018   | New Zealand Health Survey                                  | National                    | both                 | 5+                                  | 5+    | 2610                 | 2631   | 1664              | 1785   |      |
| New Zealand    | 2018-2019   | New Zealand Health Survey                                  | National                    | both                 | 5+                                  | 5+    | 2527                 | 2466   | 1611              | 1671   |      |
| New Zealand    | 2019-2020   | New Zealand Health Survey                                  | National                    | both                 | 5+                                  | 5+    | 1749                 | 1672   | 1134              | 1229   |      |
| United Kingdom | 1986-1987   | Dietary and Nutritional Survey of British Adults 1986-1987 | National                    | both                 | 16-64                               | 16-64 | 22                   | 35     | 82                | 111    | 1    |
| United Kingdom | 1991-1992   | Health Survey for England                                  | National                    | both                 | 16+                                 | 16+   | 127                  | 113    | 122               | 113    |      |
| United Kingdom | 1993        | Health Survey for England                                  | National                    | both                 | 16+                                 | 16+   | 462                  | 442    | 442               | 441    |      |
| United Kingdom | 1994        | Health Survey for England                                  | National                    | both                 | 16+                                 | 16+   | 399                  | 380    | 384               | 374    |      |
| United Kingdom | 1995        | Health Survey for England                                  | National                    | both                 | 5+                                  | 5+    | 1772                 | 1725   | 1711              | 1689   |      |
| United Kingdom | 1995        | Scottish Health Survey (SHeS)                              | Subnational                 | both                 | 16-64                               | 16-64 | 182                  | 179    | 170               | 176    |      |
| United Kingdom | 1996        | Health Survey for England                                  | National                    | both                 | 5+                                  | 5+    | 3297                 | 3031   | 1840              | 1904   |      |
| United Kingdom | 1997        | Health Survey for England                                  | National                    | both                 | 5+                                  | 5+    | 3587                 | 3459   | 2810              | 2815   |      |
| United Kingdom | 1997        | National Diet and Nutrition Survey (NDNS)                  | National                    | both                 | 5-18                                | 5-18  | 899                  | 934    | 896               | 933    |      |
| United Kingdom | 1993-2000   | EPIC Oxford                                                | Subnational                 | both                 | 20+                                 | 20+   | 7220                 | 1393   |                   |        |      |
| United Kingdom | 1998        | Health Survey for England                                  | National                    | both                 | 5+                                  | 5+    | 3080                 | 2849   | 1737              | 1774   |      |
| United Kingdom | 1998        | Scottish Health Survey (SHeS)                              | Subnational                 | both                 | 5-74                                | 5-74  | 2328                 | 2191   | 1550              | 1613   |      |
| United Kingdom | 1999        | Health Survey for England                                  | National                    | both                 | 5+                                  | 5+    | 1403                 | 1353   | 849               | 872    |      |
| United Kingdom | 1998-1999   | SportsLinX                                                 | Community                   | urban                | 9-10                                | 9-10  | 1369                 | 1433   | 1364              | 1429   |      |
| United Kingdom | 2000        | Health Survey for England                                  | National                    | both                 | 5+                                  | 5+    | 1426                 | 1400   | 851               | 903    |      |
| United Kingdom | 1999-2000   | SportsLinX                                                 | Community                   | urban                | 9-10                                | 9-10  | 1468                 | 1504   | 1439              | 1469   |      |
| United Kingdom | 2001        | Health Survey for England                                  | National                    | both                 | 5+                                  | 5+    | 2830                 | 2460   | 1624              | 1538   |      |
| United Kingdom | 2000-2001   | National Diet and Nutrition Survey (NDNS)                  | National                    | both                 | 19-64                               | 19-64 | 165                  | 140    | 9                 | 9      |      |
| United Kingdom | 2000-2001   | SportsLinX                                                 | Community                   | urban                | 9-10                                | 9-10  | 1159                 | 1175   | 1154              | 1166   |      |
| United Kingdom | 2002        | Health Survey for England                                  | National                    | both                 | 5+                                  | 5+    | 4797                 | 4532   | 3375              | 3468   |      |
| United Kingdom | 2001-2002   | SportsLinX                                                 | Community                   | urban                | 9-10                                | 9-10  | 743                  | 867    | 743               | 866    |      |
| United Kingdom | 2003        | Health Survey for England                                  | National                    | both                 | 5+                                  | 5+    | 2576                 | 2300   | 1558              | 1488   |      |
| United Kingdom | 2003        | Scottish Health Survey (SHeS)                              | Subnational                 | both                 | 5+                                  | 5+    | 1631                 | 1495   | 1156              | 1135   |      |
| United Kingdom | 2002-2003   | SportsLinX                                                 | Community                   | urban                | 9-10                                | 9-10  | 754                  | 728    | 749               | 725    |      |
| United Kingdom | 2004        | Health Survey for England                                  | National                    | both                 | 5+                                  | 5+    | 1028                 | 967    | 613               | 656    |      |
| United Kingdom | 2003-2004   | SportsLinX                                                 | Community                   | urban                | 9-10                                | 9-10  | 1931                 | 1907   | 1931              | 1906   |      |
| United Kingdom | 2005        | Health Survey for England                                  | National                    | both                 | 5+                                  | 5+    | 1691                 | 1547   | 1138              | 1140   |      |
| United Kingdom | 2004-2005   | SportsLinX                                                 | Community                   | urban                | 9-10                                | 9-10  | 1739                 | 1736   | 1712              | 1724   |      |
| United Kingdom | 2006        | Health Survey for England                                  | National                    | both                 | 5+                                  | 5+    | 3666                 | 3438   | 2739              | 2777   |      |
| United Kingdom | 2006        | Millennium Cohort Study                                    | National                    | both                 | 5-6                                 | 5-6   | 5945                 | 6194   | 5938              | 6187   |      |
| United Kingdom | 2005-2006   | SportsLinX                                                 | Community                   | urban                | 9-10                                | 9-10  | 1421                 | 1460   | 1409              | 1455   |      |
| United Kingdom | 2007        | Health Survey for England                                  | National                    | both                 | 5+                                  | 5+    | 3153                 | 3184   | 2639              | 2770   |      |
| United Kingdom | 2006-2007   | National Child Measurement Programme                       | National                    | both                 | 5-11                                | 5-11  | 358284               | 380590 | 358273            | 380581 |      |
| United Kingdom | 2006-2007   | SportsLinX                                                 | Community                   | urban                | 9-10                                | 9-10  | 1688                 | 1761   | 1683              | 1759   |      |
| United Kingdom | 2007        | Welsh Health Survey (WHS)                                  | Subnational                 | both                 | 5-15                                | 5-15  | 762                  | 788    | 751               | 782    |      |
| United Kingdom | 2008        | Health Survey for England                                  | National                    | both                 | 5+                                  | 5+    | 3933                 | 3616   | 2849              | 2800   |      |
| United Kingdom | 2008        | Millennium Cohort Study                                    | National                    | both                 | 6-8                                 | 6-8   | 6783                 | 6928   | 6762              | 6884   |      |
| United Kingdom | 2007-2008   | National Child Measurement Programme                       | National                    | both                 | 5-11                                | 5-11  | 374787               | 396801 | 374775            | 396795 |      |
| United Kingdom | 2008        | Scottish Health Survey (SHeS)                              | Subnational                 | both                 | 5+                                  | 5+    | 1024                 | 883    | 632               | 620    |      |
| United Kingdom | 2007-2008   | SportsLinX                                                 | Community                   | urban                | 9-10                                | 9-10  | 1821                 | 1855   | 1815              | 1852   |      |
| United Kingdom | 2008        | Welsh Health Survey (WHS)                                  | Subnational                 | both                 | 5-15                                | 5-15  | 635                  | 741    | 624               | 737    |      |
| United Kingdom | 2009        | Health Survey for England                                  | National                    | both                 | 5+                                  | 5+    | 1669                 | 1733   | 1374              | 1505   |      |
| United Kingdom | 2008-2009   | National Child Measurement Programme                       | National                    | both                 | 5-11                                | 5-11  | 377149               | 398497 | 377146            | 398496 |      |
| United Kingdom | 2009        | Scottish Health Survey (SHeS)                              | Subnational                 | both                 | 5+                                  | 5+    | 1307                 | 1237   | 843               | 918    |      |
| United Kingdom | 2008-2009   | SportsLinX                                                 | Community                   | urban                | 9-10                                | 9-10  | 1864                 | 1837   | 1854              | 1824   |      |
| United Kingdom | 2009        | Welsh Health Survey (WHS)                                  | Subnational                 | both                 | 5-15                                | 5-15  | 865                  | 912    | 857               | 907    |      |
| United Kingdom | 2010        | Health Survey for England                                  | National                    | both                 | 5+                                  | 5+    | 2469                 | 2396   | 1875              | 1980   |      |
| United Kingdom | 2009-2010   | National Child Measurement Programme                       | National                    | both                 | 5-11                                | 5-11  | 377962               | 398272 | 377960            | 398272 |      |

| Country                  | Study years | Survey/study name/citation                                                       | Level of representativeness | Rural, urban or both | Age range as in NCD-RisC database * |       | Sample size (height) |        | Sample size (BMI) |        | Note |
|--------------------------|-------------|----------------------------------------------------------------------------------|-----------------------------|----------------------|-------------------------------------|-------|----------------------|--------|-------------------|--------|------|
|                          |             |                                                                                  |                             |                      | Female                              | Male  | Female               | Male   | Female            | Male   |      |
| United Kingdom           | 2008-2012   | National Diet and Nutrition Survey (NDNS)                                        | National                    | both                 | 5+                                  | 5+    | 1534                 | 1451   | 1259              | 1272   |      |
| United Kingdom           | 2010        | Scottish Health Survey (SHeS)                                                    | Subnational                 | both                 | 5+                                  | 5+    | 1051                 | 976    | 575               | 639    |      |
| United Kingdom           | 2009-2010   | SportsLinX                                                                       | Community                   | urban                | 9-10                                | 9-10  | 1449                 | 1497   | 1429              | 1493   |      |
| United Kingdom           | 2010        | Welsh Health Survey (WHS)                                                        | Subnational                 | both                 | 5-15                                | 5-15  | 870                  | 901    | 859               | 892    |      |
| United Kingdom           | 2011        | Health Survey for England                                                        | National                    | both                 | 5+                                  | 5+    | 1283                 | 1044   | 713               | 639    |      |
| United Kingdom           | 2010-2011   | National Child Measurement Programme                                             | National                    | both                 | 5-11                                | 5-11  | 373473               | 393149 | 373472            | 393146 |      |
| United Kingdom           | 2011        | Scottish Health Survey (SHeS)                                                    | Subnational                 | both                 | 5+                                  | 5+    | 1043                 | 955    | 601               | 618    |      |
| United Kingdom           | 2010-2011   | SportsLinX                                                                       | Community                   | urban                | 9-10                                | 9-10  | 1261                 | 1338   | 1252              | 1332   |      |
| United Kingdom           | 2011        | Welsh Health Survey (WHS)                                                        | Subnational                 | both                 | 5-15                                | 5-15  | 847                  | 953    | 836               | 949    |      |
| United Kingdom           | 2012        | Health Survey for England                                                        | National                    | both                 | 5+                                  | 5+    | 1237                 | 1069   | 672               | 695    |      |
| United Kingdom           | 2011-2013   | International Study of Childhood Obesity, Lifestyle and the Environment (ISCOLE) | Community                   | urban                | 9-11                                | 9-11  | 288                  | 237    | 287               | 237    |      |
| United Kingdom           | 2012        | Millennium Cohort Study                                                          | National                    | both                 | 10-12                               | 10-12 | 4980                 | 5169   | 4965              | 5151   |      |
| United Kingdom           | 2011-2012   | National Child Measurement Programme                                             | National                    | both                 | 5-11                                | 5-11  | 373068               | 390385 | 373067            | 390383 |      |
| United Kingdom           | 2012        | Scottish Health Survey (SHeS)                                                    | Subnational                 | both                 | 5+                                  | 5+    | 858                  | 778    | 590               | 569    |      |
| United Kingdom           | 2011-2012   | SportsLinX                                                                       | Community                   | urban                | 9-10                                | 9-10  | 1378                 | 1334   | 1330              | 1286   |      |
| United Kingdom           | 2012        | Welsh Health Survey (WHS)                                                        | Subnational                 | both                 | 5-15                                | 5-15  | 721                  | 808    | 712               | 804    |      |
| United Kingdom           | 2013        | Health Survey for England                                                        | National                    | both                 | 5+                                  | 5+    | 1307                 | 1118   | 758               | 737    |      |
| United Kingdom           | 2012-2013   | National Child Measurement Programme                                             | National                    | both                 | 5-11                                | 5-11  | 376152               | 395648 | 376152            | 395648 |      |
| United Kingdom           | 2013        | Scottish Health Survey (SHeS)                                                    | Subnational                 | both                 | 5+                                  | 5+    | 836                  | 830    | 543               | 594    |      |
| United Kingdom           | 2014        | Health Survey for England                                                        | National                    | both                 | 5+                                  | 5+    | 1186                 | 1084   | 711               | 717    |      |
| United Kingdom           | 2013-2014   | National Child Measurement Programme                                             | National                    | both                 | 5-11                                | 5-11  | 386932               | 404989 | 386932            | 404990 |      |
| United Kingdom           | 2013-2014   | National Diet and Nutrition Survey (NDNS)                                        | National                    | both                 | 5+                                  | 5+    | 574                  | 525    | 464               | 469    |      |
| United Kingdom           | 2014        | Scottish Health Survey (SHeS)                                                    | Subnational                 | both                 | 5+                                  | 5+    | 822                  | 761    | 563               | 558    |      |
| United Kingdom           | 2013-2014   | Swan-Linx Project                                                                | Community                   | both                 | 9-11                                | 9-11  | 348                  | 335    | 333               | 329    |      |
| United Kingdom           | 2015        | Health Survey for England                                                        | National                    | both                 | 18+                                 | 18+   | 558                  | 388    | 66                | 63     |      |
| United Kingdom           | 2015        | Millennium Cohort Study                                                          | National                    | both                 | 13-15                               | 13-15 | 5696                 | 5695   | 5468              | 5625   |      |
| United Kingdom           | 2014-2015   | National Child Measurement Programme                                             | National                    | both                 | 5-11                                | 5-11  | 394748               | 412886 | 394750            | 412887 |      |
| United Kingdom           | 2015        | Scottish Health Survey (SHeS)                                                    | Subnational                 | both                 | 5+                                  | 5+    | 670                  | 679    | 396               | 459    |      |
| United Kingdom           | 2015        | Swan-Linx Project                                                                | Community                   | both                 | 9-11                                | 9-11  | 403                  | 421    | 395               | 420    |      |
| United Kingdom           | 2016        | Health Survey for England                                                        | National                    | both                 | 18+                                 | 18+   | 555                  | 413    | 59                | 61     |      |
| United Kingdom           | 2015-2016   | National Child Measurement Programme                                             | National                    | both                 | 5-11                                | 5-11  | 409834               | 427241 | 409834            | 427243 |      |
| United Kingdom           | 2015-2016   | National Diet and Nutrition Survey (NDNS)                                        | National                    | both                 | 5+                                  | 5+    | 580                  | 549    | 456               | 490    |      |
| United Kingdom           | 2016        | Scottish Health Survey (SHeS)                                                    | Subnational                 | both                 | 5+                                  | 5+    | 714                  | 683    | 476               | 494    |      |
| United Kingdom           | 2016        | Swan-Linx Project                                                                | Community                   | both                 | 9-11                                | 9-11  | 661                  | 606    | 653               | 604    |      |
| United Kingdom           | 2017        | Health Survey for England                                                        | National                    | both                 | 18+                                 | 18+   | 470                  | 360    | 56                | 49     |      |
| United Kingdom           | 2016-2017   | National Child Measurement Programme                                             | National                    | both                 | 5-11                                | 5-11  | 412586               | 430677 | 412586            | 430677 |      |
| United Kingdom           | 2017        | Scottish Health Survey                                                           | Subnational                 | both                 | 5+                                  | 5+    | 640                  | 672    | 432               | 499    |      |
| United Kingdom           | 2018        | Health Survey for England                                                        | National                    | both                 | 18+                                 | 18+   | 516                  | 381    | 53                | 63     |      |
| United Kingdom           | 2017-2018   | National Child Measurement Programme                                             | National                    | both                 | 5-11                                | 5-11  | 426632               | 444135 | 426632            | 444135 |      |
| United Kingdom           | 2016-2019   | National Diet and Nutrition Survey (NDNS)                                        | National                    | both                 | 5+                                  | 5+    | 746                  | 702    | 599               | 618    |      |
| United Kingdom           | 2018        | Scottish Health Survey                                                           | Subnational                 | both                 | 5+                                  | 5+    | 779                  | 783    | 534               | 602    |      |
| United Kingdom           | 2019        | Health Survey for England                                                        | National                    | both                 | 18+                                 | 18+   | 510                  | 370    | 79                | 72     |      |
| United Kingdom           | 2019        | Scottish Health Survey                                                           | Subnational                 | both                 | 5+                                  | 5+    | 869                  | 820    | 602               | 634    |      |
| United States of America | 1976-1977   | The Bogalusa Heart Study                                                         | Community                   | rural                | 5-17                                | 5-17  | 274                  | 298    |                   |        |      |
| United States of America | 1978-1979   | The Bogalusa Heart Study                                                         | Community                   | rural                | 5-17                                | 5-17  | 597                  | 582    |                   |        |      |
| United States of America | 1981-1982   | The Bogalusa Heart Study                                                         | Community                   | rural                | 5-17                                | 5-17  | 995                  | 978    |                   |        |      |
| United States of America | 1983-1985   | The Bogalusa Heart Study                                                         | Community                   | rural                | 5-17                                | 5-17  | 833                  | 775    |                   |        |      |
| United States of America | 1987-1988   | The Bogalusa Heart Study                                                         | Community                   | rural                | 5-17                                | 5-17  | 1595                 | 1648   |                   |        |      |
| United States of America | 1988-1994   | US NHANES III                                                                    | National                    | both                 | 5+                                  | 5+    | 3862                 | 3661   | 3775              | 3634   |      |
| United States of America | 1992-1994   | The Bogalusa Heart Study                                                         | Community                   | rural                | 5-17                                | 5-17  | 1593                 | 1528   | 1593              | 1525   |      |
| United States of America | 1996        | National Longitudinal Study of Adolescent Health Wave II                         | National                    | both                 | 11-21                               | 11-21 | 2437                 | 2256   | 2377              | 2217   | 5    |
| United States of America | 1998-1999   | Coronary Artery Risk Detection in Appalachian Communities (CARDIAC), 5th Grade   | Subnational                 | both                 | 10-12                               | 10-12 | 451                  | 534    | 450               | 534    |      |
| United States of America | 1999        | Early Childhood Longitudinal Study                                               | National                    | both                 | 5-7                                 | 5-7   | 2493                 | 2553   | 2476              | 2523   |      |
| United States of America | 2000-2001   | Coronary Artery Risk Detection in Appalachian Communities (CARDIAC), 5th Grade   | Subnational                 | both                 | 10-12                               | 10-12 | 566                  | 639    | 566               | 639    |      |
| United States of America | 2000        | Early Childhood Longitudinal Study                                               | National                    | both                 | 6-8                                 | 6-8   | 7761                 | 8104   | 7548              | 7887   |      |
| United States of America | 1999-2000   | US NHANES 1999-2000                                                              | National                    | both                 | 5+                                  | 5+    | 2210                 | 2090   | 1714              | 1766   |      |
| United States of America | 2001        | Coronary Artery Risk Detection in Appalachian Communities (CARDIAC), 5th Grade   | Subnational                 | both                 | 10-12                               | 10-12 | 1629                 | 1724   | 1625              | 1724   |      |
| United States of America | 2001-2002   | National Longitudinal Study of Adolescent Health Wave III                        | National                    | both                 | 18-28                               | 18-28 | 2521                 | 2178   | 318               | 227    | 5    |
| United States of America | 2002-2003   | Coronary Artery Risk Detection in Appalachian Communities (CARDIAC), 5th Grade   | Subnational                 | both                 | 10-12                               | 10-12 | 2588                 | 2638   | 2585              | 2630   |      |
| United States of America | 2002        | Early Childhood Longitudinal Study                                               | National                    | both                 | 8-9                                 | 8-9   | 6689                 | 6888   | 6674              | 6873   |      |
| United States of America | 2001-2002   | US NHANES 2001-2002                                                              | National                    | both                 | 5+                                  | 5+    | 2470                 | 2281   | 1812              | 1826   |      |
| United States of America | 2003-2004   | Coronary Artery Risk Detection in Appalachian Communities (CARDIAC), 5th Grade   | Subnational                 | both                 | 10-12                               | 10-12 | 4063                 | 4581   | 4055              | 4573   |      |
| United States of America | 2004-2005   | Coronary Artery Risk Detection in Appalachian Communities (CARDIAC), 5th Grade   | Subnational                 | both                 | 10-12                               | 10-12 | 4276                 | 4342   | 4272              | 4332   |      |
| United States of America | 2004        | Early Childhood Longitudinal Study                                               | National                    | both                 | 10-11                               | 10-11 | 5122                 | 5116   | 5115              | 5111   |      |
| United States of America | 2003-2004   | US NHANES 2003-2004                                                              | National                    | both                 | 5+                                  | 5+    | 2157                 | 2108   | 1643              | 1700   |      |
| United States of America | 2005-2006   | Coronary Artery Risk Detection in Appalachian Communities (CARDIAC), 2nd Grade   | Subnational                 | urban                | 7-9                                 | 7-9   | 262                  | 318    | 261               | 318    |      |

| Country                    | Study years | Survey/study name/citation                                                       | Level of representativeness | Rural, urban or both | Age range as in NCD-RisC database * |       | Sample size (height) |       | Sample size (BMI) |       | Note |
|----------------------------|-------------|----------------------------------------------------------------------------------|-----------------------------|----------------------|-------------------------------------|-------|----------------------|-------|-------------------|-------|------|
|                            |             |                                                                                  |                             |                      | Female                              | Male  | Female               | Male  | Female            | Male  |      |
| United States of America   | 2005-2006   | Coronary Artery Risk Detection in Appalachian Communities (CARDIAC), 5th Grade   | Subnational                 | both                 | 10-12                               | 10-12 | 3712                 | 4379  | 3705              | 4371  |      |
| United States of America   | 2006-2007   | Coronary Artery Risk Detection in Appalachian Communities (CARDIAC), 2nd Grade   | Subnational                 | both                 | 7-9                                 | 7-9   | 265                  | 346   | 264               | 344   |      |
| United States of America   | 2006-2007   | Coronary Artery Risk Detection in Appalachian Communities (CARDIAC), 5th Grade   | Subnational                 | both                 | 10-12                               | 10-12 | 2911                 | 3532  | 2905              | 3526  |      |
| United States of America   | 2005-2006   | US NHANES 2005-2006                                                              | National                    | both                 | 5+                                  | 5+    | 2368                 | 2154  | 1714              | 1746  |      |
| United States of America   | 2007-2008   | Coronary Artery Risk Detection in Appalachian Communities (CARDIAC), 2nd Grade   | Subnational                 | both                 | 7-9                                 | 7-9   | 3356                 | 3279  | 3354              | 3279  |      |
| United States of America   | 2007-2008   | Coronary Artery Risk Detection in Appalachian Communities (CARDIAC), 5th Grade   | Subnational                 | both                 | 10-12                               | 10-12 | 3074                 | 3506  | 3070              | 3502  |      |
| United States of America   | 2007        | Early Childhood Longitudinal Study                                               | National                    | both                 | 13-14                               | 13-14 | 3890                 | 3856  | 3829              | 3804  |      |
| United States of America   | 2008-2009   | Coronary Artery Risk Detection in Appalachian Communities (CARDIAC), 2nd Grade   | Subnational                 | both                 | 7-9                                 | 7-9   | 4407                 | 4231  | 4398              | 4220  |      |
| United States of America   | 2008-2009   | Coronary Artery Risk Detection in Appalachian Communities (CARDIAC), 5th Grade   | Subnational                 | both                 | 10-12                               | 10-12 | 3050                 | 3582  | 3048              | 3581  |      |
| United States of America   | 2007-2008   | US NHANES 2007-2008                                                              | National                    | both                 | 5+                                  | 5+    | 1666                 | 1765  | 1234              | 1340  |      |
| United States of America   | 2009-2010   | Coronary Artery Risk Detection in Appalachian Communities (CARDIAC), 2nd Grade   | Subnational                 | both                 | 7-9                                 | 7-9   | 5260                 | 4970  | 5255              | 4963  |      |
| United States of America   | 2009-2010   | Coronary Artery Risk Detection in Appalachian Communities (CARDIAC), 5th Grade   | Subnational                 | both                 | 10-12                               | 10-12 | 2929                 | 3388  | 2927              | 3386  |      |
| United States of America   | 2008-2009   | National Longitudinal Study of Adolescent Health Wave IV                         | National                    | both                 | 24-34                               | 24-34 | 1639                 | 1291  |                   |       | 5    |
| United States of America   | 2010-2011   | Coronary Artery Risk Detection in Appalachian Communities (CARDIAC), 2nd Grade   | Subnational                 | both                 | 7-9                                 | 7-9   | 5038                 | 4786  | 5036              | 4785  |      |
| United States of America   | 2010-2011   | Coronary Artery Risk Detection in Appalachian Communities (CARDIAC), 5th Grade   | Subnational                 | both                 | 10-12                               | 10-12 | 2769                 | 3246  | 2769              | 3243  |      |
| United States of America   | 2010        | Early Childhood Longitudinal Study                                               | National                    | both                 | 5-6                                 | 5-6   | 7281                 | 7687  | 7277              | 7683  |      |
| United States of America   | 2009-2010   | US NHANES 2009-2010                                                              | National                    | both                 | 5+                                  | 5+    | 1845                 | 1872  | 1297              | 1402  |      |
| United States of America   | 2011-2012   | Coronary Artery Risk Detection in Appalachian Communities (CARDIAC), 2nd Grade   | Subnational                 | both                 | 7-9                                 | 7-9   | 4130                 | 3844  | 4127              | 3842  |      |
| United States of America   | 2011-2012   | Coronary Artery Risk Detection in Appalachian Communities (CARDIAC), 5th Grade   | Subnational                 | both                 | 10-12                               | 10-12 | 2089                 | 2593  | 2086              | 2591  |      |
| United States of America   | 2011        | Early Childhood Longitudinal Study                                               | National                    | both                 | 5-7                                 | 5-7   | 2460                 | 2691  | 2460              | 2689  |      |
| United States of America   | 2011        | Early Childhood Longitudinal Study                                               | National                    | both                 | 5-7                                 | 5-7   | 8245                 | 8599  | 8237              | 8592  |      |
| United States of America   | 2012-2013   | Coronary Artery Risk Detection in Appalachian Communities (CARDIAC), 2nd Grade   | Subnational                 | both                 | 7-9                                 | 7-9   | 4876                 | 4330  | 4868              | 4326  |      |
| United States of America   | 2012-2013   | Coronary Artery Risk Detection in Appalachian Communities (CARDIAC), 5th Grade   | Subnational                 | both                 | 10-12                               | 10-12 | 2279                 | 2726  | 2279              | 2726  |      |
| United States of America   | 2012        | Early Childhood Longitudinal Study                                               | National                    | both                 | 6-8                                 | 6-8   | 2213                 | 2388  | 2213              | 2386  |      |
| United States of America   | 2012        | Early Childhood Longitudinal Study                                               | National                    | both                 | 6-8                                 | 6-8   | 7217                 | 7513  | 7205              | 7498  |      |
| United States of America   | 2011-2013   | International Study of Childhood Obesity, Lifestyle and the Environment (ISCOLE) | Community                   | urban                | 9-11                                | 9-11  | 370                  | 281   | 368               | 281   |      |
| United States of America   | 2011-2012   | US NHANES 2011-2012                                                              | National                    | both                 | 5+                                  | 5+    | 1757                 | 1854  | 1292              | 1366  |      |
| United States of America   | 2013-2014   | Coronary Artery Risk Detection in Appalachian Communities (CARDIAC), 2nd Grade   | Subnational                 | both                 | 7-9                                 | 7-9   | 5107                 | 4712  | 5101              | 4708  |      |
| United States of America   | 2013-2014   | Coronary Artery Risk Detection in Appalachian Communities (CARDIAC), 5th Grade   | Subnational                 | both                 | 10-12                               | 10-12 | 1961                 | 2365  | 1961              | 2364  |      |
| United States of America   | 2013        | Early Childhood Longitudinal Study                                               | National                    | both                 | 7-9                                 | 7-9   | 6550                 | 6794  | 6526              | 6778  |      |
| United States of America   | 2014-2015   | Coronary Artery Risk Detection in Appalachian Communities (CARDIAC), 2nd Grade   | Subnational                 | both                 | 7-9                                 | 7-9   | 5202                 | 4893  | 5200              | 4891  |      |
| United States of America   | 2014-2015   | Coronary Artery Risk Detection in Appalachian Communities (CARDIAC), 5th Grade   | Subnational                 | both                 | 10-12                               | 10-12 | 1867                 | 2269  | 1867              | 2269  |      |
| United States of America   | 2014        | Early Childhood Longitudinal Study                                               | National                    | both                 | 8-10                                | 8-10  | 6021                 | 6290  | 5981              | 6251  |      |
| United States of America   | 2013-2014   | US NHANES 2013-2014                                                              | National                    | both                 | 5+                                  | 5+    | 1875                 | 1917  | 1410              | 1467  |      |
| United States of America   | 2015        | Early Childhood Longitudinal Study                                               | National                    | both                 | 9-11                                | 9-11  | 5578                 | 5805  | 5512              | 5755  |      |
| United States of America   | 2016        | Early Childhood Longitudinal Study                                               | National                    | both                 | 10-12                               | 10-12 | 5231                 | 5487  | 5170              | 5429  |      |
| United States of America   | 2015-2016   | US NHANES 2015-2016                                                              | National                    | both                 | 5+                                  | 5+    | 1831                 | 1806  | 1337              | 1376  |      |
| United States of America   | 2017-2018   | US NHANES 2017-2018                                                              | National                    | both                 | 5+                                  | 5+    | 1556                 | 1523  | 1158              | 1150  |      |
| United States of America   | 2019-2020   | US NHANES 2019-2020                                                              | Subnational                 | both                 | 5+                                  | 5+    | 1006                 | 1066  | 740               | 838   | 6    |
| <i>Northwestern Europe</i> |             |                                                                                  |                             |                      |                                     |       |                      |       |                   |       |      |
| Austria                    | 1987        | The Austrian Conscription Database                                               | National                    | both                 |                                     | 17-18 |                      |       |                   | 55292 | 1    |
| Austria                    | 1988        | The Austrian Conscription Database                                               | National                    | both                 |                                     | 17-18 |                      | 25865 |                   | 51050 | 1    |
| Austria                    | 1989        | The Austrian Conscription Database                                               | National                    | both                 |                                     | 17-18 |                      | 49381 |                   | 49380 | 1    |
| Austria                    | 1990        | The Austrian Conscription Database                                               | National                    | both                 |                                     | 17-18 |                      | 47103 |                   | 47102 |      |
| Austria                    | 1991        | The Austrian Conscription Database                                               | National                    | both                 |                                     | 17-18 |                      | 44288 |                   | 44288 |      |
| Austria                    | 1992        | The Austrian Conscription Database                                               | National                    | both                 |                                     | 17-18 |                      | 43555 |                   | 43553 |      |
| Austria                    | 1992        | Vorarlberg Health Monitoring and Promotion Programme (VHM&PP)                    | Subnational                 | both                 | 18+                                 | 18+   | 73                   | 54    | 73                | 54    |      |
| Austria                    | 1993        | The Austrian Conscription Database                                               | National                    | both                 |                                     | 17-18 |                      | 42357 |                   | 42356 |      |
| Austria                    | 1994        | The Austrian Conscription Database                                               | National                    | both                 |                                     | 17-18 |                      | 40402 |                   | 40401 |      |
| Austria                    | 1995        | The Austrian Conscription Database                                               | National                    | both                 |                                     | 17-18 |                      | 39813 |                   | 39809 |      |
| Austria                    | 1996        | The Austrian Conscription Database                                               | National                    | both                 |                                     | 17-18 |                      | 39587 |                   | 39587 |      |
| Austria                    | 1997        | The Austrian Conscription Database                                               | National                    | both                 |                                     | 17-18 |                      | 40408 |                   | 40408 |      |
| Austria                    | 1998        | The Austrian Conscription Database                                               | National                    | both                 |                                     | 17-18 |                      | 43131 |                   | 43131 |      |
| Austria                    | 1998        | Vorarlberg Health Monitoring and Promotion Programme (VHM&PP)                    | Subnational                 | both                 | 18+                                 | 18+   | 2339                 | 1403  | 30                | 18    |      |
| Austria                    | 1999        | The Austrian Conscription Database                                               | National                    | both                 |                                     | 17-18 |                      | 44163 |                   | 44163 |      |
| Austria                    | 1998-1999   | CINDI survey Vorarlberg/Austria                                                  | Subnational                 | both                 | 25-64                               | 25-64 | 48                   | 37    |                   |       |      |
| Austria                    | 2000        | The Austrian Conscription Database                                               | National                    | both                 |                                     | 17-18 |                      | 44278 |                   | 44275 |      |
| Austria                    | 2001        | The Austrian Conscription Database                                               | National                    | both                 |                                     | 17-18 |                      | 43318 |                   | 43315 |      |
| Austria                    | 2002        | The Austrian Conscription Database                                               | National                    | both                 |                                     | 17-18 |                      | 42899 |                   | 42899 |      |
| Austria                    | 2003        | The Austrian Conscription Database                                               | National                    | both                 |                                     | 17-18 |                      | 42389 |                   | 42389 |      |
| Austria                    | 2004        | The Austrian Conscription Database                                               | National                    | both                 |                                     | 17-18 |                      | 42774 |                   | 42774 |      |
| Austria                    | 2004        | Vorarlberg Health Monitoring and Promotion Programme (VHM&PP)                    | Subnational                 | both                 | 18+                                 | 18+   | 2052                 | 1346  | 68                | 30    |      |
| Austria                    | 2005        | The Austrian Conscription Database                                               | National                    | both                 |                                     | 17-18 |                      | 42907 |                   | 42906 |      |
| Austria                    | 2004-2005   | Vorarlberg Health Monitoring and Promotion Programme (VHM&PP)                    | Subnational                 | both                 | 6-17                                | 6-17  | 15822                | 17503 | 15822             | 17503 |      |
| Austria                    | 2006        | The Austrian Conscription Database                                               | National                    | both                 |                                     | 17-18 |                      | 44572 |                   | 44571 |      |
| Austria                    | 2007        | The Austrian Conscription Database                                               | National                    | both                 |                                     | 17-18 |                      | 44756 |                   | 44755 |      |

| Country | Study years | Survey/study name/citation                                                                                       | Level of representativeness | Rural, urban or both | Age range as in NCD-RisC database * |       | Sample size (height) |       | Sample size (BMI) |       | Note |
|---------|-------------|------------------------------------------------------------------------------------------------------------------|-----------------------------|----------------------|-------------------------------------|-------|----------------------|-------|-------------------|-------|------|
|         |             |                                                                                                                  |                             |                      | Female                              | Male  | Female               | Male  | Female            | Male  |      |
| Austria | 2006-2007   | HELENA                                                                                                           | Community                   | urban                | 12-17                               | 12-17 | 211                  | 191   | 211               | 191   |      |
| Austria | 2008        | The Austrian Conscriptio Database                                                                                | National                    | both                 |                                     | 17-18 |                      | 44880 |                   | 44880 |      |
| Austria | 2009        | The Austrian Conscriptio Database                                                                                | National                    | both                 |                                     | 17-18 |                      | 45594 |                   | 45594 |      |
| Austria | 2008-2009   | Vorarlberg Health Monitoring and Promotion Programme (VHM&PP)                                                    | Subnational                 | both                 | 6-17                                | 6-17  | 15294                | 16846 | 15294             | 16846 |      |
| Austria | 2009-2011   | Mayer et al., Ann Hum Biol 42(1):45-55, 2015                                                                     | National                    | both                 | 5-17                                | 5-17  | 6339                 | 6638  | 6340              | 6634  |      |
| Austria | 2010        | The Austrian Conscriptio Database                                                                                | National                    | both                 |                                     | 17-18 |                      | 44968 |                   | 44968 |      |
| Austria | 2010-2012   | Austrian Study on Nutritional Status 2012                                                                        | National                    | both                 | 6-80                                | 6-80  | 250                  | 213   | 183               | 181   |      |
| Austria | 2011        | The Austrian Conscriptio Database                                                                                | National                    | both                 |                                     | 17-18 |                      | 44076 |                   | 44076 |      |
| Austria | 2012        | The Austrian Conscriptio Database                                                                                | National                    | both                 |                                     | 17-18 |                      | 42768 |                   | 42768 |      |
| Austria | 2011-2012   | BMI in Upper Austrian children and adolescents                                                                   | Subnational                 | both                 | 6-17                                | 6-17  |                      |       | 6853              | 7808  |      |
| Austria | 2013        | The Austrian Conscriptio Database                                                                                | National                    | both                 |                                     | 17-18 |                      | 41574 |                   | 41574 |      |
| Austria | 2012-2013   | Vorarlberg Health Monitoring and Promotion Programme (VHM&PP)                                                    | Subnational                 | both                 | 6-17                                | 6-17  | 13648                | 14759 | 13648             | 14759 |      |
| Austria | 2014        | The Austrian Conscriptio Database                                                                                | National                    | both                 |                                     | 17-18 |                      | 41740 |                   | 41740 |      |
| Austria | 2013-2014   | Prevalence of obesity and motor performance in Tyrolean preschool children                                       | Subnational                 | both                 | 5                                   | 5     | 513                  | 550   | 513               | 550   |      |
| Austria | 2013-2017   | Austrian Study on Nutrition (ASN)                                                                                | National                    | both                 | 19-64                               | 19-64 | 242                  | 130   | 5                 | 4     |      |
| Austria | 2015        | The Austrian Conscriptio Database                                                                                | National                    | both                 |                                     | 17-18 |                      | 39154 |                   | 39154 |      |
| Austria | 2014-2015   | Influence of selected risk factors on the motor performance of 10 to 11-year-old schoolchildren                  | Subnational                 | both                 | 10-11                               | 10-11 | 129                  | 197   | 129               | 197   |      |
| Austria | 2016        | The Austrian Conscriptio Database                                                                                | National                    | both                 |                                     | 17-19 |                      | 35944 |                   | 35944 |      |
| Austria | 2015-2016   | Childhood Obesity Surveillance Initiative 4                                                                      | National                    | both                 | 8-9                                 | 8-9   | 1175                 | 1220  | 1175              | 1220  |      |
| Austria | 2015-2017   | EVA Tyrol Study Austria North East Tyrol                                                                         | Subnational                 | both                 | 14-17                               | 14-17 | 636                  | 545   | 636               | 545   |      |
| Austria | 2015-2016   | Vorarlberg Health Monitoring and Promotion Programme (VHM&PP)                                                    | Subnational                 | both                 | 6-17                                | 6-17  | 12047                | 13037 | 12047             | 13037 |      |
| Austria | 2017        | The Austrian Conscriptio Database                                                                                | National                    | both                 |                                     | 17-19 |                      | 34400 |                   | 34399 |      |
| Austria | 2018        | The Austrian Conscriptio Database                                                                                | National                    | both                 |                                     | 17-19 |                      | 34188 |                   | 34188 |      |
| Austria | 2019        | The Austrian Conscriptio Database                                                                                | National                    | both                 |                                     | 17-19 |                      | 32185 |                   | 32185 |      |
| Austria | 2019        | Childhood Obesity Surveillance Initiative 5                                                                      | National                    | both                 | 8-9                                 | 8-9   | 1152                 | 1242  | 1137              | 1223  |      |
| Belgium | 1996-1998   | Flemish Study on Environment, Genes and Health Outcomes                                                          | Community                   | rural                | 10-84                               | 10-84 | 129                  | 132   | 76                | 72    |      |
| Belgium | 1998-2000   | Flemish Study on Environment, Genes and Health Outcomes                                                          | Community                   | rural                | 10-80                               | 10-80 | 64                   | 64    | 32                | 25    |      |
| Belgium | 1999-2001   | Flemish Study on Environment, Genes and Health Outcomes                                                          | Community                   | rural                | 10-81                               | 10-81 | 60                   | 56    | 34                | 29    |      |
| Belgium | 2001        | Flemish Study on Environment, Genes and Health Outcomes                                                          | Community                   | rural                | 10-78                               | 10-78 | 62                   | 67    | 22                | 19    |      |
| Belgium | 2002-2003   | Flemish Study on Environment, Genes and Health Outcomes                                                          | Community                   | rural                | 10-81                               | 10-81 | 46                   | 30    | 21                | 9     |      |
| Belgium | 2002-2005   | Flemish Study on Environment, Genes and Health Outcomes                                                          | Community                   | rural                | 10-88                               | 10-88 | 125                  | 123   | 68                | 70    |      |
| Belgium | 2005-2008   | Flemish Study on Environment, Genes and Health Outcomes                                                          | Community                   | rural                | 10-89                               | 10-89 | 65                   | 82    | 23                | 24    |      |
| Belgium | 2006-2007   | HELENA                                                                                                           | Community                   | urban                | 12-17                               | 12-17 | 180                  | 156   | 180               | 156   |      |
| Belgium | 2007-2008   | Childhood Obesity Surveillance Initiative 1                                                                      | Subnational                 | both                 | 6-9                                 | 6-9   | 61755                | 64322 | 61754             | 64322 |      |
| Belgium | 2007-2010   | Identification and prevention of Dietary- and lifestyle-induced health Effects In Children and infants (IDEFICS) | Community                   | urban                | 5-9                                 | 5-9   | 834                  | 822   | 834               | 822   |      |
| Belgium | 2009-2010   | Childhood Obesity Surveillance Initiative 2                                                                      | Subnational                 | both                 | 6-9                                 | 6-9   | 65373                | 67783 | 65365             | 67775 |      |
| Belgium | 2010        | European Energy balance Research to prevent excessive weight Gain among Youth - The ENERGY-project               | Subnational                 | urban                | 10-12                               | 10-12 | 497                  | 460   | 497               | 460   |      |
| Belgium | 2009-2013   | Flemish Study on Environment, Genes and Health Outcomes                                                          | Community                   | rural                | 20-88                               | 20-88 | 24                   | 16    |                   |       |      |
| Belgium | 2012-2013   | Childhood Obesity Surveillance Initiative 3                                                                      | Subnational                 | both                 | 6-9                                 | 6-9   | 67876                | 70442 | 67874             | 70441 |      |
| Belgium | 2010-2015   | Flemish Study on Environment, Genes and Health Outcomes                                                          | Community                   | rural                | 15-87                               | 15-87 | 48                   | 38    | 2                 | 2     |      |
| Belgium | 2014-2015   | Food Consumption Survey                                                                                          | National                    | urban                | 5-64                                | 5-64  | 1036                 | 1050  | 892               | 908   |      |
| Belgium | 2018-2019   | Belgian Health Examination Survey                                                                                | National                    | both                 | 18+                                 | 18+   | 76                   | 65    | 6                 | 7     |      |
| Denmark | 1977        | Copenhagen School Health Records Register                                                                        | Community                   | urban                | 6-13                                | 6-13  | 1004                 | 1025  |                   |       |      |
| Denmark | 1978        | Copenhagen School Health Records Register                                                                        | Community                   | urban                | 6-13                                | 6-13  | 2587                 | 2594  |                   |       |      |
| Denmark | 1979        | Copenhagen School Health Records Register                                                                        | Community                   | urban                | 6-13                                | 6-13  | 3855                 | 3837  |                   |       |      |
| Denmark | 1980        | Copenhagen School Health Records Register                                                                        | Community                   | urban                | 6-13                                | 6-13  | 5143                 | 5211  |                   |       |      |
| Denmark | 1981        | Copenhagen School Health Records Register                                                                        | Community                   | urban                | 6-13                                | 6-13  | 6859                 | 6845  |                   |       |      |
| Denmark | 1982        | Copenhagen School Health Records Register                                                                        | Community                   | urban                | 6-13                                | 6-13  | 7964                 | 8087  |                   |       |      |
| Denmark | 1983        | Copenhagen School Health Records Register                                                                        | Community                   | urban                | 6-13                                | 6-13  | 6941                 | 6929  |                   |       |      |
| Denmark | 1984        | Copenhagen School Health Records Register                                                                        | Community                   | urban                | 6-13                                | 6-13  | 4947                 | 4886  |                   |       |      |
| Denmark | 1985        | Copenhagen School Health Records Register                                                                        | Community                   | urban                | 6-13                                | 6-13  | 4275                 | 4266  |                   |       |      |
| Denmark | 1986        | Copenhagen School Health Records Register                                                                        | Community                   | urban                | 6-13                                | 6-13  | 4462                 | 4533  |                   |       |      |
| Denmark | 1987        | Copenhagen School Health Records Register                                                                        | Community                   | urban                | 6-13                                | 6-13  | 4544                 | 4686  |                   |       |      |
| Denmark | 1988        | Copenhagen School Health Records Register                                                                        | Community                   | urban                | 6-13                                | 6-13  | 4501                 | 4738  |                   |       |      |
| Denmark | 1989        | Copenhagen School Health Records Register                                                                        | Community                   | urban                | 6-13                                | 6-13  | 4598                 | 4845  |                   |       |      |
| Denmark | 1990        | Copenhagen School Health Records Register                                                                        | Community                   | urban                | 6-13                                | 6-13  | 4449                 | 4669  | 4449              | 4669  |      |
| Denmark | 1991        | Copenhagen School Health Records Register                                                                        | Community                   | urban                | 6-13                                | 6-13  | 4811                 | 4844  | 4811              | 4844  |      |
| Denmark | 1992        | Copenhagen School Health Records Register                                                                        | Community                   | urban                | 6-13                                | 6-13  | 5104                 | 5243  | 5104              | 5243  |      |
| Denmark | 1993        | Copenhagen School Health Records Register                                                                        | Community                   | urban                | 6-13                                | 6-13  | 4890                 | 4968  | 4890              | 4968  |      |
| Denmark | 1994        | Copenhagen School Health Records Register                                                                        | Community                   | urban                | 6-13                                | 6-13  | 4005                 | 4065  | 4005              | 4065  |      |
| Denmark | 1995        | Copenhagen School Health Records Register                                                                        | Community                   | urban                | 6-13                                | 6-13  | 5379                 | 5437  | 5379              | 5437  |      |
| Denmark | 1996        | Copenhagen School Health Records Register                                                                        | Community                   | urban                | 6-13                                | 6-13  | 4670                 | 4674  | 4670              | 4674  |      |
| Denmark | 1997        | Copenhagen School Health Records Register                                                                        | Community                   | urban                | 7-13                                | 7-13  | 4025                 | 4105  | 4025              | 4105  |      |
| Denmark | 1998        | Copenhagen School Health Records Register                                                                        | Community                   | urban                | 8-13                                | 8-13  | 3253                 | 3203  | 3253              | 3203  |      |
| Denmark | 1997-1998   | The European Youth Heart Study                                                                                   | Community                   | urban                | 8-18                                | 8-18  | 532                  | 485   | 532               | 485   |      |
| Denmark | 1999        | Copenhagen School Health Records Register                                                                        | Community                   | urban                | 9-13                                | 9-13  | 2777                 | 2860  | 2777              | 2860  |      |

| Country | Study years | Survey/study name/citation                                                       | Level of representativeness | Rural, urban or both | Age range as in NCD-RisC database * |       | Sample size (height) |       | Sample size (BMI) |       | Note |
|---------|-------------|----------------------------------------------------------------------------------|-----------------------------|----------------------|-------------------------------------|-------|----------------------|-------|-------------------|-------|------|
|         |             |                                                                                  |                             |                      | Female                              | Male  | Female               | Male  | Female            | Male  |      |
| Denmark | 2000        | Copenhagen School Health Records Register                                        | Community                   | urban                | 10-13                               | 10-13 | 1923                 | 1911  | 1923              | 1911  |      |
| Denmark | 2001        | Copenhagen School Health Records Register                                        | Community                   | urban                | 11-13                               | 11-13 | 1595                 | 1594  | 1595              | 1594  |      |
| Denmark | 2001-2002   | The Copenhagen School Child Intervention Study                                   | Community                   | urban                | 5-8                                 | 5-8   | 329                  | 362   | 329               | 362   |      |
| Denmark | 2002        | Copenhagen School Health Records Register                                        | Community                   | urban                | 12-13                               | 12-13 | 895                  | 860   | 895               | 860   |      |
| Denmark | 2001-2003   | Copenhagen City Heart Study                                                      | Subnational                 | urban                | 20+                                 | 20+   | 281                  | 171   |                   |       |      |
| Denmark | 2003        | Copenhagen School Health Records Register                                        | Community                   | urban                | 13                                  | 13    | 369                  | 322   | 369               | 322   |      |
| Denmark | 2003-2004   | The European Youth Heart Study                                                   | Community                   | urban                | 8-17                                | 8-17  | 509                  | 392   | 509               | 392   |      |
| Denmark | 2003-2004   | Copenhagen General Population Study 1                                            | Subnational                 | urban                | 20+                                 | 20+   | 136                  | 92    |                   |       |      |
| Denmark | 2004-2005   | The Copenhagen School Child Intervention Study                                   | Community                   | urban                | 8-11                                | 8-11  | 130                  | 121   | 130               | 121   |      |
| Denmark | 2005        | Copenhagen General Population Study 1                                            | Subnational                 | urban                | 20+                                 | 20+   | 123                  | 85    |                   |       |      |
| Denmark | 2006        | The Danish Conscription Database                                                 | National                    | both                 |                                     | 17-26 |                      | 12860 |                   | 9823  |      |
| Denmark | 2006        | Copenhagen General Population Study 1                                            | Subnational                 | urban                | 20+                                 | 20+   | 81                   | 59    |                   |       |      |
| Denmark | 2007        | The Danish Conscription Database                                                 | National                    | both                 |                                     | 17-26 |                      | 27007 |                   | 20753 |      |
| Denmark | 2006-2008   | The Health2006 Cohort                                                            | Subnational                 | urban                | 18-71                               | 18-71 | 196                  | 109   | 13                | 14    |      |
| Denmark | 2007        | Copenhagen General Population Study 1                                            | Subnational                 | urban                | 20+                                 | 20+   | 243                  | 211   |                   |       |      |
| Denmark | 2008        | The Childhood Health Activity and Motor Performance School Study                 | Community                   | both                 | 5-10                                | 5-10  | 627                  | 545   | 626               | 544   |      |
| Denmark | 2008        | The Danish Conscription Database                                                 | National                    | both                 |                                     | 17-26 |                      | 24278 |                   | 19590 |      |
| Denmark | 2008        | The Copenhagen School Child Intervention Study                                   | Community                   | urban                | 12-14                               | 12-14 | 112                  | 99    | 111               | 99    |      |
| Denmark | 2007-2008   | The Danish Health Examination Survey 2007-2008                                   | National                    | both                 | 18+                                 | 18+   | 703                  | 365   | 100               | 63    |      |
| Denmark | 2008        | Copenhagen General Population Study 1                                            | Subnational                 | urban                | 20+                                 | 20+   | 129                  | 100   |                   |       |      |
| Denmark | 2009        | The Childhood Health Activity and Motor Performance School Study                 | Community                   | both                 | 6-12                                | 6-12  | 246                  | 238   | 246               | 238   |      |
| Denmark | 2009        | The Childhood Health Activity and Motor Performance School Study                 | Community                   | both                 | 6-11                                | 6-11  | 243                  | 231   | 243               | 231   |      |
| Denmark | 2009        | The Danish Conscription Database                                                 | National                    | both                 |                                     | 17-26 |                      | 26604 |                   | 19876 |      |
| Denmark | 2009        | Copenhagen General Population Study 1                                            | Subnational                 | urban                | 20+                                 | 20+   | 43                   | 43    |                   |       |      |
| Denmark | 2010        | The Childhood Health Activity and Motor Performance School Study                 | Community                   | both                 | 7-13                                | 7-13  | 248                  | 254   | 248               | 253   |      |
| Denmark | 2010        | The Childhood Health Activity and Motor Performance School Study                 | Community                   | both                 | 7-12                                | 7-12  | 235                  | 234   | 235               | 234   |      |
| Denmark | 2010        | The Danish Conscription Database                                                 | National                    | both                 |                                     | 17-26 |                      | 30656 |                   | 23027 |      |
| Denmark | 2009-2010   | The European Youth Heart Study                                                   | Community                   | both                 | 14-28                               | 14-28 | 563                  | 482   | 219               | 176   |      |
| Denmark | 2010        | Copenhagen General Population Study 1                                            | Subnational                 | urban                | 20+                                 | 20+   | 84                   | 64    |                   |       |      |
| Denmark | 2011        | The Childhood Health Activity and Motor Performance School Study                 | Community                   | both                 | 8-13                                | 8-13  | 241                  | 245   | 241               | 245   |      |
| Denmark | 2011        | The Danish Conscription Database                                                 | National                    | both                 |                                     | 17-26 |                      | 30636 |                   | 23679 |      |
| Denmark | 2011        | Copenhagen General Population Study 1                                            | Subnational                 | urban                | 20+                                 | 20+   | 74                   | 46    |                   |       |      |
| Denmark | 2012        | The Childhood Health Activity and Motor Performance School Study                 | Community                   | both                 | 9-14                                | 9-14  | 251                  | 274   | 249               | 273   |      |
| Denmark | 2012        | The Danish Conscription Database                                                 | National                    | both                 |                                     | 17-26 |                      | 29573 |                   | 23366 |      |
| Denmark | 2011-2012   | The OPUS School Meal Study                                                       | Subnational                 | both                 | 8-11                                | 8-11  | 388                  | 427   | 388               | 427   |      |
| Denmark | 2012        | Copenhagen General Population Study 1                                            | Subnational                 | urban                | 20+                                 | 20+   | 47                   | 52    |                   |       |      |
| Denmark | 2011-2012   | The Health2006 cohort - 5-year follow-up                                         | Subnational                 | urban                | 24-76                               | 24-76 | 58                   | 39    |                   |       |      |
| Denmark | 2013        | The Childhood Health Activity and Motor Performance School Study                 | Community                   | both                 | 10-15                               | 10-15 | 210                  | 225   | 208               | 225   |      |
| Denmark | 2013        | The Danish Conscription Database                                                 | National                    | both                 |                                     | 17-26 |                      | 30523 |                   | 24466 |      |
| Denmark | 2013        | Learning, Cognition and Motion (LCoMotion)                                       | Subnational                 | both                 | 11-14                               | 11-14 | 365                  | 353   | 365               | 353   |      |
| Denmark | 2013        | Copenhagen General Population Study 1                                            | Subnational                 | urban                | 20+                                 | 20+   | 129                  | 97    |                   |       |      |
| Denmark | 2014        | The Danish Conscription Database                                                 | National                    | both                 |                                     | 17-26 |                      | 32367 |                   | 26595 |      |
| Denmark | 2012-2015   | The Danish study of Functional Disorders (DanFUND)                               | Subnational                 | urban                | 18-72                               | 18-72 | 357                  | 289   | 29                | 17    |      |
| Denmark | 2014        | Copenhagen General Population Study 2                                            | Subnational                 | urban                | 20+                                 | 20+   | 32                   | 22    |                   |       |      |
| Denmark | 2015        | The Childhood Health Activity and Motor Performance School Study                 | Community                   | both                 | 12-17                               | 12-17 | 122                  | 122   | 120               | 122   |      |
| Denmark | 2015        | The Danish Conscription Database                                                 | National                    | both                 |                                     | 17-26 |                      | 28873 |                   | 24458 |      |
| Denmark | 2014-2015   | Copenhagen General Population Study 1                                            | Subnational                 | urban                | 20+                                 | 20+   | 65                   | 50    |                   |       |      |
| Denmark | 2015        | Copenhagen General Population Study 2                                            | Subnational                 | urban                | 20+                                 | 20+   | 93                   | 87    |                   |       |      |
| Denmark | 2016        | The Danish Conscription Database                                                 | National                    | both                 |                                     | 17-29 |                      | 29057 |                   | 24145 |      |
| Denmark | 2015-2016   | Childhood Obesity Surveillance Initiative 4                                      | National                    | both                 | 6-7                                 | 6-7   | 1273                 | 1327  | 1271              | 1326  |      |
| Denmark | 2016        | Copenhagen General Population Study 2                                            | Subnational                 | urban                | 20+                                 | 20+   | 103                  | 89    |                   |       |      |
| Denmark | 2017        | The Danish Conscription Database                                                 | National                    | both                 |                                     | 17-29 |                      | 31057 |                   | 26415 |      |
| Denmark | 2017        | Copenhagen General Population Study 2                                            | Subnational                 | urban                | 20+                                 | 20+   | 46                   | 31    |                   |       |      |
| Denmark | 2018        | The Danish Conscription Database                                                 | National                    | both                 |                                     | 17-29 |                      | 27597 |                   | 24085 |      |
| Denmark | 2019        | The Danish Conscription Database                                                 | National                    | both                 |                                     | 17-29 |                      | 27412 |                   | 22663 |      |
| Denmark | 2019        | Childhood Obesity Surveillance Initiative 5                                      | National                    | both                 | 6-7                                 | 6-7   | 1288                 | 1201  | 1288              | 1201  |      |
| Finland | 1980        | Young Finns Study 1980                                                           | National                    | both                 | 5-18                                | 5-18  | 621                  | 600   |                   |       |      |
| Finland | 1983        | Young Finns Study 1983                                                           | National                    | both                 | 6-21                                | 6-21  | 773                  | 786   |                   |       |      |
| Finland | 1986        | Young Finns Study 1986                                                           | National                    | both                 | 9-24                                | 9-24  | 730                  | 715   |                   |       |      |
| Finland | 2001        | Young Finns Study 2001                                                           | National                    | both                 | 24-39                               | 24-39 | 581                  | 487   |                   |       |      |
| Finland | 2001-2002   | Northern Finland Birth Cohort 1986                                               | Community                   | both                 | 15-17                               | 15-17 | 3202                 | 3133  | 3194              | 3125  |      |
| Finland | 2002        | The National FINRISK Study                                                       | National                    | both                 | 25-74                               | 25-74 | 426                  | 278   |                   |       |      |
| Finland | 2007        | The National FINRISK Study                                                       | National                    | both                 | 25-74                               | 25-74 | 295                  | 216   |                   |       |      |
| Finland | 2007        | Young Finns Study 2007                                                           | National                    | both                 | 30-45                               | 30-45 | 161                  | 160   |                   |       |      |
| Finland | 2011-2013   | International Study of Childhood Obesity, Lifestyle and the Environment (ISCOLE) | Community                   | urban                | 9-11                                | 9-11  | 283                  | 253   | 282               | 253   |      |
| Finland | 2012        | The National FINRISK Study                                                       | National                    | both                 | 25-74                               | 25-74 | 262                  | 203   |                   |       |      |

| Country     | Study years | Survey/study name/citation                                                                                                                | Level of representativeness | Rural, urban or both | Age range as in NCD-RisC database * |       | Sample size (height) |        | Sample size (BMI) |        | Note |
|-------------|-------------|-------------------------------------------------------------------------------------------------------------------------------------------|-----------------------------|----------------------|-------------------------------------|-------|----------------------|--------|-------------------|--------|------|
|             |             |                                                                                                                                           |                             |                      | Female                              | Male  | Female               | Male   | Female            | Male   |      |
| Finland     | 2015-2016   | Childhood Obesity Surveillance Initiative 4                                                                                               | National                    | both                 | 7-9                                 | 7-9   | 6388                 | 6598   | 6388              | 6598   |      |
| Finland     | 2016        | Register of Primary Health Care visits                                                                                                    | Subnational                 | both                 | 5-17                                | 5-17  | 122959               | 129618 | 122959            | 129618 |      |
| Finland     | 2017        | The FinHealth Survey                                                                                                                      | National                    | both                 | 18+                                 | 18+   | 280                  | 241    | 19                | 11     |      |
| Finland     | 2017        | Register of Primary Health Care visits                                                                                                    | Subnational                 | both                 | 5-17                                | 5-17  | 139888               | 148712 | 139888            | 148712 |      |
| Finland     | 2018        | Register of Primary Health Care visits                                                                                                    | Subnational                 | both                 | 5-17                                | 5-17  | 148201               | 157581 | 148201            | 157581 |      |
| Finland     | 2019        | Childhood Obesity Surveillance Initiative 5                                                                                               | National                    | both                 | 7-9                                 | 7-9   | 5096                 | 5750   | 5096              | 5749   |      |
| Germany     | 1990        | The German Conscript Database                                                                                                             | Subnational                 | both                 |                                     | 19    |                      | 206615 |                   | 206599 |      |
| Germany     | 1991        | The German Conscript Database                                                                                                             | National                    | both                 |                                     | 19    |                      | 138205 |                   | 138195 |      |
| Germany     | 1992        | The German Conscript Database                                                                                                             | National                    | both                 |                                     | 19    |                      | 220992 |                   | 220956 |      |
| Germany     | 1993        | The German Conscript Database                                                                                                             | National                    | both                 |                                     | 19    |                      | 188700 |                   | 188655 |      |
| Germany     | 1994        | The German Conscript Database                                                                                                             | National                    | both                 |                                     | 19    |                      | 155442 |                   | 155426 |      |
| Germany     | 1995        | The German Conscript Database                                                                                                             | National                    | both                 |                                     | 19    |                      | 185793 |                   | 185762 |      |
| Germany     | 1996        | The German Conscript Database                                                                                                             | National                    | both                 |                                     | 19    |                      | 191265 |                   | 191260 |      |
| Germany     | 1997        | The German Conscript Database                                                                                                             | National                    | both                 |                                     | 19    |                      | 148774 |                   | 148738 |      |
| Germany     | 1997-1999   | German National Health Interview and Examination Survey (GNHIES98)                                                                        | National                    | both                 | 18-79                               | 18-79 | 634                  | 645    | 124               | 142    |      |
| Germany     | 1998        | The German Conscript Database                                                                                                             | National                    | both                 |                                     | 19    |                      | 146563 |                   | 146528 |      |
| Germany     | 1999        | The German Conscript Database                                                                                                             | National                    | both                 |                                     | 19    |                      | 292829 |                   | 292732 |      |
| Germany     | 1997-2001   | Study of Health in Pomerania (SHIP-0) baseline study                                                                                      | Subnational                 | both                 | 20-80                               | 20-80 | 318                  | 274    |                   |        |      |
| Germany     | 1999-2001   | KORA-S4 (Cooperative Health Research in the Augsburg Region)                                                                              | Community                   | both                 | 24-75                               | 24-75 | 171                  | 149    |                   |        |      |
| Germany     | 2002        | Echinococcus Multilocularis and Internal Diseases in Leutkirch                                                                            | Community                   | urban                | 12-65                               | 12-65 | 316                  | 313    | 177               | 162    |      |
| Germany     | 2002-2006   | Study of Health in Pomerania (SHIP-1) 5-year follow-up                                                                                    | Subnational                 | both                 | 25-85                               | 25-85 | 86                   | 60     |                   |        |      |
| Germany     | 2003-2006   | German Health Interview and Examination Survey for Children and Adolescents (KIGGS)                                                       | National                    | both                 | 5-17                                | 5-17  | 6286                 | 6622   | 6260              | 6602   |      |
| Germany     | 2006-2007   | HELENA                                                                                                                                    | Community                   | urban                | 12-17                               | 12-17 | 194                  | 282    | 194               | 282    |      |
| Germany     | 2008        | The German Conscript Database                                                                                                             | National                    | both                 |                                     | 19    |                      | 98942  |                   | 98926  |      |
| Germany     | 2009        | The German Conscript Database                                                                                                             | National                    | both                 |                                     | 19    |                      | 111461 |                   | 111455 |      |
| Germany     | 2007-2010   | Identification and prevention of Dietary- and lifestyle-induced health Effects In Children and infants (IDEFICS)                          | Community                   | urban                | 5-9                                 | 5-9   | 762                  | 772    | 762               | 772    |      |
| Germany     | 2010        | The German Conscript Database                                                                                                             | National                    | both                 |                                     | 19    |                      | 101928 |                   | 101911 |      |
| Germany     | 2008-2011   | German Health Interview and Examination Survey for adults 2008-11 (DEGS1)                                                                 | National                    | both                 | 18-79                               | 18-79 | 545                  | 520    | 92                | 123    |      |
| Germany     | 2008-2012   | Study of Health in Pomerania, second cohort (SHIP-TREND)                                                                                  | Subnational                 | both                 | 20-79                               | 20-79 | 194                  | 190    |                   |        |      |
| Germany     | 2014-2017   | German Health Interview and Examination Survey for Children and Adolescents (KIGGS) - Wave 2                                              | National                    | both                 | 5-17                                | 5-17  | 1584                 | 1541   | 1584              | 1541   |      |
| Germany     | 2018-2019   | Childhood Obesity Surveillance Initiative 5                                                                                               | Community                   | urban                | 7-9                                 | 7-9   | 1111                 | 1110   | 1111              | 1110   |      |
| Greenland   | 2005-2010   | Population Health Survey in Greenland                                                                                                     | National                    | both                 | 18+                                 | 18+   | 333                  | 242    | 50                | 40     |      |
| Iceland     | 2005-2011   | Risk Evaluation For Infarct Estimates (REFINE)                                                                                            | Subnational                 | urban                | 20-73                               | 20-73 | 249                  | 232    |                   |        |      |
| Iceland     | 2010-2012   | Risk Evaluation For Infarct Estimates (REFINE) follow-up visit (REFINELO)                                                                 | Subnational                 | urban                | 26-74                               | 26-74 | 13                   | 6      |                   |        |      |
| Luxembourg  | 2007-2009   | Observation of cardiovascular risk factors in Luxembourg (ORISCAV-LUX)                                                                    | National                    | both                 | 18-69                               | 18-69 | 115                  | 106    | 13                | 16     |      |
| Luxembourg  | 2013-2015   | European Health Examination Survey                                                                                                        | National                    | both                 | 25-64                               | 25-64 | 65                   | 42     |                   |        |      |
| Luxembourg  | 2016-2018   | Observation of cardiovascular risk factors in Luxembourg (ORISCAV-LUX2)                                                                   | National                    | both                 | 25-79                               | 25-79 | 23                   | 29     |                   |        |      |
| Netherlands | 1998-2001   | Regenboog Project                                                                                                                         | National                    | both                 | 12-89                               | 12-89 | 483                  | 409    | 205               | 179    |      |
| Netherlands | 2004-2006   | Prevention and Incidence of Asthma and Mite Allergy (PIAMA)                                                                               | National                    | both                 | 7-9                                 | 7-9   | 1103                 | 1106   | 1103              | 1106   |      |
| Netherlands | 2008-2011   | Prevention and Incidence of Asthma and Mite Allergy (PIAMA)                                                                               | National                    | both                 | 12-13                               | 12-13 | 771                  | 738    | 769               | 738    |      |
| Netherlands | 2008-2011   | Amsterdam Born Children and their Development Study (ABCD)                                                                                | Community                   | both                 | 5-7                                 | 5-7   | 1435                 | 1453   | 1434              | 1450   |      |
| Netherlands | 2010        | European Energy balance Research to prevent excessive weight Gain among Youth - The ENERGY-project                                        | National                    | both                 | 10-12                               | 10-12 | 400                  | 404    | 399               | 404    |      |
| Netherlands | 2011-2013   | GECKO Drenthe Onderzoek                                                                                                                   | Subnational                 | rural                | 5-7                                 | 5-7   | 1133                 | 1139   | 1133              | 1139   |      |
| Netherlands | 2011-2015   | Healthy Life in an Urban Setting (HELIUS)                                                                                                 | Community                   | urban                | 18-71                               | 18-71 | 471                  | 289    | 50                | 30     |      |
| Netherlands | 2012-2014   | Prevention and Incidence of Asthma and Mite Allergy (PIAMA)                                                                               | National                    | both                 | 15-17                               | 15-17 | 415                  | 386    | 413               | 386    |      |
| Netherlands | 2012-2016   | Amsterdam Born Children and their Development Study (ABCD)                                                                                | Community                   | both                 | 9-12                                | 9-12  | 1082                 | 1074   | 1080              | 1073   |      |
| Netherlands | 2016-2018   | GECKO Drenthe Onderzoek                                                                                                                   | Subnational                 | rural                | 8-12                                | 8-12  | 1117                 | 1085   | 1114              | 1083   |      |
| Norway      | 1995-1997   | Young-HUNT1 Study                                                                                                                         | Subnational                 | rural                | 12-21                               | 12-21 | 4251                 | 4196   | 4241              | 4194   |      |
| Norway      | 1995-1997   | HUNT2 study                                                                                                                               | Subnational                 | rural                | 20+                                 | 20+   | 4764                 | 3963   |                   |        |      |
| Norway      | 1999-2000   | European Youth Heart Study                                                                                                                | Community                   | urban                | 9-15                                | 9-15  | 369                  | 365    | 369               | 364    |      |
| Norway      | 2000-2001   | Young-HUNT2 Study                                                                                                                         | Subnational                 | rural                | 16-21                               | 16-21 | 901                  | 764    | 884               | 755    |      |
| Norway      | 2000-2003   | The Oslo cohort (HUBRO), the Oppland and Hedmark cohort (OPPHED), and the Troms and Finnmark cohort (TROFINN) of Cohort of Norway (CONOR) | Subnational                 | both                 | 30-76                               | 30-76 | 3768                 | 3024   |                   |        |      |
| Norway      | 2005-2006   | Physical Activity among Norwegian Children and Adolescents                                                                                | National                    | both                 | 8-16                                | 8-16  | 1058                 | 1186   | 1055              | 1186   |      |
| Norway      | 2006-2008   | Young-HUNT3 Study                                                                                                                         | Subnational                 | rural                | 12-21                               | 12-21 | 3797                 | 3809   | 3777              | 3788   |      |
| Norway      | 2006-2008   | HUNT3 Study                                                                                                                               | Subnational                 | rural                | 20+                                 | 20+   | 2638                 | 1859   |                   |        |      |
| Norway      | 2008        | Childhood Obesity Surveillance Initiative 1                                                                                               | National                    | both                 | 8                                   | 8     | 1399                 | 1435   | 1399              | 1435   |      |
| Norway      | 2010        | Childhood Obesity Surveillance Initiative 2                                                                                               | National                    | both                 | 8                                   | 8     | 1286                 | 1335   | 1286              | 1335   |      |
| Norway      | 2010        | European Energy balance Research to prevent excessive weight Gain among Youth - The ENERGY-project                                        | Subnational                 | urban                | 10-13                               | 10-13 | 492                  | 458    | 491               | 458    |      |
| Norway      | 2012        | Childhood Obesity Surveillance Initiative 3                                                                                               | National                    | both                 | 8                                   | 8     | 1381                 | 1492   | 1381              | 1492   |      |
| Norway      | 2015-2016   | Childhood Obesity Surveillance Initiative 4                                                                                               | National                    | both                 | 7-8                                 | 7-8   | 1645                 | 1690   | 1645              | 1690   |      |
| Sweden      | 1978        | BMI Epidemiology Study                                                                                                                    | Community                   | urban                |                                     | 7     |                      | 212    |                   |        |      |
| Sweden      | 1979        | BMI Epidemiology Study                                                                                                                    | Community                   | urban                |                                     | 8     |                      | 409    |                   |        |      |
| Sweden      | 1979-1980   | 1973 Birth Cohort                                                                                                                         | National                    | both                 | 6                                   | 6     | 441                  | 451    |                   |        |      |
| Sweden      | 1980        | BMI Epidemiology Study                                                                                                                    | Community                   | urban                |                                     | 9     |                      | 324    |                   |        |      |
| Sweden      | 1980-1981   | 1973 Birth Cohort                                                                                                                         | National                    | both                 | 7                                   | 7     | 1334                 | 1428   |                   |        |      |

| Country | Study years | Survey/study name/citation           | Level of representativeness | Rural, urban or both | Age range as in NCD-RisC database * |       | Sample size (height) |       | Sample size (BMI) |       | Note |
|---------|-------------|--------------------------------------|-----------------------------|----------------------|-------------------------------------|-------|----------------------|-------|-------------------|-------|------|
|         |             |                                      |                             |                      | Female                              | Male  | Female               | Male  | Female            | Male  |      |
| Sweden  | 1981-1982   | 1973 Birth Cohort                    | National                    | both                 | 8                                   | 8     | 902                  | 935   |                   |       |      |
| Sweden  | 1982-1983   | 1973 Birth Cohort                    | National                    | both                 | 9                                   | 9     | 669                  | 717   |                   |       |      |
| Sweden  | 1983        | BMI Epidemiology Study               | Community                   | urban                |                                     | 7     |                      | 103   |                   |       |      |
| Sweden  | 1983-1984   | 1973 Birth Cohort                    | National                    | both                 | 10                                  | 10    | 1367                 | 1488  |                   |       |      |
| Sweden  | 1984        | BMI Epidemiology Study               | Community                   | urban                |                                     | 8     |                      | 407   |                   |       |      |
| Sweden  | 1984-1985   | 1973 Birth Cohort                    | National                    | both                 | 11                                  | 11    | 542                  | 523   |                   |       |      |
| Sweden  | 1985        | BMI Epidemiology Study               | Community                   | urban                |                                     | 9     |                      | 357   |                   |       |      |
| Sweden  | 1985-1986   | 1973 Birth Cohort                    | National                    | both                 | 12                                  | 12    | 1226                 | 1323  |                   |       |      |
| Sweden  | 1986-1987   | 1973 Birth Cohort                    | National                    | both                 | 13                                  | 13    | 823                  | 799   | 729               | 709   | 1    |
| Sweden  | 1986-1987   | 1981 Birth Cohort                    | National                    | both                 | 5                                   | 5     | 961                  | 940   | 958               | 935   | 1    |
| Sweden  | 1987        | The Swedish Conscript Database       | National                    | both                 |                                     | 17-18 |                      |       |                   | 49300 | 1    |
| Sweden  | 1987-1988   | 1973 Birth Cohort                    | National                    | both                 | 14                                  | 14    | 1342                 | 1455  | 1294              | 1405  | 1    |
| Sweden  | 1987-1988   | 1981 Birth Cohort                    | National                    | both                 | 6                                   | 6     | 781                  | 811   | 780               | 808   | 1    |
| Sweden  | 1988        | The Swedish Conscript Database       | National                    | both                 |                                     | 17-18 |                      | 17462 |                   | 47918 | 1    |
| Sweden  | 1988        | BMI Epidemiology Study               | Community                   | urban                |                                     | 7     |                      | 65    |                   |       |      |
| Sweden  | 1988-1989   | 1973 Birth Cohort                    | National                    | both                 | 15                                  | 15    | 1008                 | 1069  | 929               | 964   | 1    |
| Sweden  | 1988-1989   | 1981 Birth Cohort                    | National                    | both                 | 7                                   | 7     | 1499                 | 1521  | 1489              | 1508  | 1    |
| Sweden  | 1989        | The Swedish Conscript Database       | National                    | both                 |                                     | 17-18 |                      | 48106 |                   | 48106 | 1    |
| Sweden  | 1989        | BMI Epidemiology Study               | Community                   | urban                |                                     | 8     |                      | 407   |                   |       |      |
| Sweden  | 1989-1990   | 1973 Birth Cohort                    | National                    | both                 | 16                                  | 16    | 856                  | 971   | 785               | 912   |      |
| Sweden  | 1989-1990   | 1981 Birth Cohort                    | National                    | both                 | 8                                   | 8     | 1535                 | 1515  | 1511              | 1497  |      |
| Sweden  | 1990        | BMI Epidemiology Study               | Community                   | urban                |                                     | 9     |                      | 379   |                   | 379   |      |
| Sweden  | 1990        | The Swedish Conscript Database       | National                    | both                 |                                     | 17-18 |                      | 48876 |                   | 48876 |      |
| Sweden  | 1990-1991   | 1973 Birth Cohort                    | National                    | both                 | 17                                  | 17    | 610                  | 910   | 588               | 881   |      |
| Sweden  | 1990-1991   | 1981 Birth Cohort                    | National                    | both                 | 9                                   | 9     | 1118                 | 1102  | 1108              | 1091  |      |
| Sweden  | 1991        | The Swedish Conscript Database       | National                    | both                 |                                     | 17-18 |                      | 49147 |                   | 49147 |      |
| Sweden  | 1992        | 1973 Birth Cohort                    | National                    | both                 | 18                                  | 18    | 402                  | 1296  | 390               | 1290  |      |
| Sweden  | 1991-1992   | 1981 Birth Cohort                    | National                    | both                 | 10                                  | 10    | 1434                 | 1411  | 1415              | 1405  |      |
| Sweden  | 1992        | The Swedish Conscript Database       | National                    | both                 |                                     | 17-18 |                      | 47272 |                   | 47272 |      |
| Sweden  | 1992-1993   | 1981 Birth Cohort                    | National                    | both                 | 11                                  | 11    | 812                  | 807   | 785               | 785   |      |
| Sweden  | 1993        | BMI Epidemiology Study               | Community                   | urban                |                                     | 7     |                      | 125   |                   | 125   |      |
| Sweden  | 1993        | The Swedish Conscript Database       | National                    | both                 |                                     | 17-18 |                      | 46241 |                   | 46241 |      |
| Sweden  | 1993-1994   | 1981 Birth Cohort                    | National                    | both                 | 12                                  | 12    | 1405                 | 1343  | 1378              | 1318  |      |
| Sweden  | 1994        | BMI Epidemiology Study               | Community                   | urban                |                                     | 8     |                      | 376   |                   | 376   |      |
| Sweden  | 1994        | The Swedish Conscript Database       | National                    | both                 |                                     | 17-18 |                      | 43644 |                   | 43644 |      |
| Sweden  | 1994-1995   | 1981 Birth Cohort                    | National                    | both                 | 13                                  | 13    | 1015                 | 964   | 954               | 924   |      |
| Sweden  | 1995        | BMI Epidemiology Study               | Community                   | urban                |                                     | 9     |                      | 293   |                   | 293   |      |
| Sweden  | 1995        | The Swedish Conscript Database       | National                    | both                 |                                     | 17-18 |                      | 43654 |                   | 43654 |      |
| Sweden  | 1995-1996   | 1981 Birth Cohort                    | National                    | both                 | 14                                  | 14    | 1316                 | 1238  | 1266              | 1202  |      |
| Sweden  | 1996        | The Swedish Conscript Database       | National                    | both                 |                                     | 17-18 |                      | 43773 |                   | 43773 |      |
| Sweden  | 1996-1997   | 1981 Birth Cohort                    | National                    | both                 | 15                                  | 15    | 1190                 | 1187  | 1134              | 1143  |      |
| Sweden  | 1997        | The Swedish Conscript Database       | National                    | both                 |                                     | 17-18 |                      | 37068 |                   | 37068 |      |
| Sweden  | 1997-1998   | 1981 Birth Cohort                    | National                    | both                 | 16                                  | 16    | 897                  | 850   | 862               | 819   |      |
| Sweden  | 1998        | BMI Epidemiology Study               | Community                   | urban                |                                     | 7     |                      | 707   |                   | 707   |      |
| Sweden  | 1998        | The Swedish Conscript Database       | National                    | both                 |                                     | 17-18 |                      | 42544 |                   | 42544 |      |
| Sweden  | 1998-1999   | 1981 Birth Cohort                    | National                    | both                 | 17                                  | 17    | 178                  | 416   | 171               | 406   |      |
| Sweden  | 1999        | 1981 Birth Cohort                    | National                    | both                 | 18                                  | 18    | 23                   | 831   | 23                | 831   |      |
| Sweden  | 1999        | BMI Epidemiology Study               | Community                   | urban                |                                     | 8     |                      | 980   |                   | 980   |      |
| Sweden  | 1998-1999   | European Youth Heart Study (EYHS) I  | Subnational                 | urban                | 8-16                                | 8-16  | 603                  | 526   | 602               | 525   |      |
| Sweden  | 1999        | The Swedish Conscript Database       | National                    | both                 |                                     | 17-18 |                      | 37844 |                   | 37844 |      |
| Sweden  | 1999        | MONICA Northern Sweden               | Subnational                 | both                 | 25-74                               | 25-74 | 55                   | 62    |                   |       |      |
| Sweden  | 2000        | BMI Epidemiology Study               | Community                   | urban                |                                     | 9     |                      | 860   |                   | 860   |      |
| Sweden  | 2000        | The Swedish Conscript Database       | National                    | both                 |                                     | 17-18 |                      | 31319 |                   | 31319 |      |
| Sweden  | 2000-2002   | The COMPASS study                    | Community                   | urban                | 14-16                               | 14-16 | 1597                 | 1718  | 1597              | 1718  |      |
| Sweden  | 2001        | The Swedish Conscript Database       | National                    | both                 |                                     | 17-18 |                      | 29764 |                   | 29764 |      |
| Sweden  | 2002        | The Swedish Conscript Database       | National                    | both                 |                                     | 17-18 |                      | 24575 |                   | 24575 |      |
| Sweden  | 2003        | BMI Epidemiology Study               | Community                   | urban                |                                     | 7     |                      | 15    |                   | 15    |      |
| Sweden  | 2003        | The Swedish Conscript Database       | National                    | both                 |                                     | 17-18 |                      | 29192 |                   | 29192 |      |
| Sweden  | 2001-2004   | Swedish INTERGENE Cohort Study       | Subnational                 | both                 | 24-76                               | 24-76 | 107                  | 82    |                   |       |      |
| Sweden  | 2004        | BMI Epidemiology Study               | Community                   | urban                |                                     | 8     |                      | 285   |                   | 285   |      |
| Sweden  | 2004        | The Swedish Conscript Database       | National                    | both                 |                                     | 17-18 |                      | 27851 |                   | 27851 |      |
| Sweden  | 2004        | MONICA Northern Sweden               | Subnational                 | both                 | 26-75                               | 26-75 | 50                   | 62    |                   |       |      |
| Sweden  | 2005        | BMI Epidemiology Study               | Community                   | urban                |                                     | 9     |                      | 301   |                   | 301   |      |
| Sweden  | 2004-2005   | European Youth Heart Study (EYHS) II | Subnational                 | urban                | 15-21                               | 15-21 | 262                  | 196   | 151               | 126   |      |
| Sweden  | 2005        | The Swedish Conscript Database       | National                    | both                 |                                     | 17-18 |                      | 25831 |                   | 25831 |      |
| Sweden  | 2007        | BMI Epidemiology Study               | Community                   | urban                |                                     | 7     |                      | 1327  |                   | 1327  |      |

| Country                    | Study years | Survey/study name/citation                                                                                       | Level of representativeness | Rural, urban or both | Age range as in NCD-RisC database * |            | Sample size (height) |       | Sample size (BMI) |       | Note |
|----------------------------|-------------|------------------------------------------------------------------------------------------------------------------|-----------------------------|----------------------|-------------------------------------|------------|----------------------|-------|-------------------|-------|------|
|                            |             |                                                                                                                  |                             |                      | Female                              | Male       | Female               | Male  | Female            | Male  |      |
| Sweden                     | 2006-2007   | HELENA                                                                                                           | Community                   | urban                | 12-17                               | 12-17      | 208                  | 132   | 208               | 132   |      |
| Sweden                     | 2008        | BMI Epidemiology Study                                                                                           | Community                   | urban                |                                     | 7-8        |                      | 2501  |                   | 2501  |      |
| Sweden                     | 2008        | Childhood Obesity Surveillance Initiative 1                                                                      | National                    | both                 | 7-9                                 | 7-9        | 2189                 | 2374  | 2189              | 2374  |      |
| Sweden                     | 2009        | BMI Epidemiology Study                                                                                           | Community                   | urban                |                                     | 7-9        |                      | 3706  |                   | 3706  |      |
| Sweden                     | 2007-2010   | Identification and prevention of Dietary- and lifestyle-induced health Effects In Children and infants (IDEFICS) | Community                   | urban                | 5-9                                 | 5-9        | 557                  | 557   | 557               | 557   |      |
| Sweden                     | 2009        | MONICA Northern Sweden                                                                                           | Subnational                 | both                 | 25-74                               | 25-74      | 80                   | 61    |                   |       |      |
| Sweden                     | 2010        | BMI Epidemiology Study                                                                                           | Community                   | urban                |                                     | 8-9        |                      | 2425  |                   | 2425  |      |
| Sweden                     | 2011        | BMI Epidemiology Study                                                                                           | Community                   | urban                |                                     | 9          |                      | 1412  |                   | 1412  |      |
| Sweden                     | 2012        | BMI Epidemiology Study                                                                                           | Community                   | urban                |                                     | 7          |                      | 1551  |                   | 1551  |      |
| Sweden                     | 2013        | BMI Epidemiology Study                                                                                           | Community                   | urban                |                                     | 7-8        |                      | 2875  |                   | 2875  |      |
| Sweden                     | 2014        | BMI Epidemiology Study                                                                                           | Community                   | urban                |                                     | 7-9        |                      | 4251  |                   | 4251  |      |
| Sweden                     | 2014        | MONICA Northern Sweden                                                                                           | Subnational                 | both                 | 25-74                               | 25-74      | 44                   | 45    |                   |       |      |
| Sweden                     | 2015        | BMI Epidemiology Study                                                                                           | Community                   | urban                |                                     | 8-9        |                      | 1917  |                   | 1917  |      |
| Sweden                     | 2016        | BMI Epidemiology Study                                                                                           | Community                   | urban                |                                     | 9          |                      | 35    |                   | 35    |      |
| Sweden                     | 2015-2016   | Childhood Obesity Surveillance Initiative 4                                                                      | National                    | both                 | 6-9                                 | 6-9        | 3798                 | 4071  | 3798              | 4070  |      |
| Sweden                     | 2019        | Childhood Obesity Surveillance Initiative 5                                                                      | National                    | both                 | 6-9                                 | 6-9        | 30002                | 31644 | 30002             | 31642 |      |
| Switzerland                | 1993-1994   | The Swiss Conscriptio Database                                                                                   | National                    | both                 |                                     | 19         |                      | 23499 |                   |       |      |
| Switzerland                | 2002        | Prevalence of overweight and obesity in 6-12-year old children in Switzerland                                    | National                    | both                 | 6-12                                | 6-12       | 1235                 | 1196  | 1235              | 1196  |      |
| Switzerland                | 2004        | The Swiss Conscriptio Database                                                                                   | National                    | both                 |                                     | 18-20      |                      | 20491 |                   | 16987 |      |
| Switzerland                | 2005        | The Swiss Conscriptio Database                                                                                   | National                    | both                 |                                     | 18-20      |                      | 32131 |                   | 24432 |      |
| Switzerland                | 2005        | Kinder- und Jugendsportstudie (KISS)                                                                             | Subnational                 | both                 | 6-13                                | 6-13       | 256                  | 238   | 256               | 238   |      |
| Switzerland                | 2005-2006   | BMI Monitoring for Switzerland - Study 1                                                                         | Community                   | urban                | 5-11                                | 5-11       | 4103                 | 4477  | 4103              | 4477  | 7    |
| Switzerland                | 2005-2006   | Chioloro et al., J Hypertens 25(11):2209-17, 2007                                                                | Subnational                 | both                 | 10-14                               | 10-14      | 2586                 | 2621  | 2586              | 2621  |      |
| Switzerland                | 2006        | The Swiss Conscriptio Database                                                                                   | National                    | both                 |                                     | 18-20      |                      | 34530 |                   | 25845 |      |
| Switzerland                | 2006        | Kinder- und Jugendsportstudie (KISS)                                                                             | Subnational                 | both                 | 7-14                                | 7-14       | 102                  | 98    | 102               | 98    |      |
| Switzerland                | 2006-2007   | BMI Monitoring for Switzerland - Study 1                                                                         | Community                   | urban                | 5-11                                | 5-11       | 3896                 | 4061  | 3896              | 4061  | 7    |
| Switzerland                | 2007        | The Swiss Conscriptio Database                                                                                   | National                    | both                 |                                     | 18-20      |                      | 36194 |                   | 27229 |      |
| Switzerland                | 2007        | Prevalence of overweight and obesity in 6-12-year old children in Switzerland                                    | National                    | both                 | 6-12                                | 6-12       | 1136                 | 1082  | 1136              | 1082  |      |
| Switzerland                | 2007-2008   | BMI Monitoring for Switzerland - Study 1                                                                         | Community                   | urban                | 5-11                                | 5-11       | 4009                 | 4067  | 4009              | 4067  | 7    |
| Switzerland                | 2008        | The Swiss Conscriptio Database                                                                                   | National                    | both                 |                                     | 18-20      |                      | 34497 |                   | 25977 |      |
| Switzerland                | 2008-2009   | BMI Monitoring for Switzerland - Study 1                                                                         | Community                   | urban                | 5-11                                | 5-11       | 3847                 | 3998  | 3847              | 3998  | 7    |
| Switzerland                | 2008-2010   | BMI Monitoring for Switzerland - Study 2                                                                         | Subnational                 | both                 | 6                                   | 6          | 1110                 | 1048  | 1110              | 1048  | 7    |
| Switzerland                | 2009        | The Swiss Conscriptio Database                                                                                   | National                    | both                 |                                     | 18-20      |                      | 34896 |                   | 25811 |      |
| Switzerland                | 2009        | Kinder- und Jugendsportstudie (KISS)                                                                             | Subnational                 | both                 | 10-17                               | 10-17      | 63                   | 43    | 63                | 43    |      |
| Switzerland                | 2009-2010   | BMI Monitoring for Switzerland - Study 1                                                                         | Community                   | urban                | 5-11                                | 5-11       | 3913                 | 4051  | 3913              | 4051  | 7    |
| Switzerland                | 2010        | The Swiss Conscriptio Database                                                                                   | National                    | both                 |                                     | 18-20      |                      | 33815 |                   | 25308 |      |
| Switzerland                | 2007-2012   | Bus Santé Study                                                                                                  | Subnational                 | urban                | 20-80                               | 20-80      | 57                   | 60    |                   |       |      |
| Switzerland                | 2010-2011   | BMI Monitoring for Switzerland - Study 1                                                                         | Community                   | urban                | 5-11                                | 5-11       | 3734                 | 4092  | 3734              | 4092  | 7    |
| Switzerland                | 2011        | The Swiss Conscriptio Database                                                                                   | National                    | both                 |                                     | 18-20      |                      | 34495 |                   | 26133 |      |
| Switzerland                | 2011-2012   | BMI Monitoring for Switzerland - Study 1                                                                         | Community                   | urban                | 5-11                                | 5-11       | 3940                 | 4085  | 3940              | 4085  | 7    |
| Switzerland                | 2010-2013   | BMI Monitoring for Switzerland - Study 2                                                                         | Subnational                 | both                 | 5-11                                | 5-11       | 9346                 | 9735  | 9346              | 9735  | 7    |
| Switzerland                | 2012        | The Swiss Conscriptio Database                                                                                   | National                    | both                 |                                     | 18-20      |                      | 33590 |                   | 25709 |      |
| Switzerland                | 2012        | Prevalence of overweight and obesity in 6-12-year old children in Switzerland                                    | National                    | both                 | 6-12                                | 6-12       | 1464                 | 1499  | 1464              | 1499  |      |
| Switzerland                | 2012-2013   | BMI Monitoring for Switzerland - Study 1                                                                         | Community                   | urban                | 5-11                                | 5-11       | 4042                 | 4224  | 4042              | 4224  | 7    |
| Switzerland                | 2013        | The Swiss Conscriptio Database                                                                                   | National                    | both                 |                                     | 18-20      |                      | 32882 |                   | 25309 |      |
| Switzerland                | 2013-2014   | BMI Monitoring for Switzerland - Study 1                                                                         | Community                   | urban                | 5-11                                | 5-11       | 4073                 | 4333  | 4073              | 4333  | 7    |
| Switzerland                | 2014        | The Swiss Conscriptio Database                                                                                   | National                    | both                 |                                     | 18-20      |                      | 32687 |                   | 26517 |      |
| Switzerland                | 2014-2015   | National Nutrition Survey menuCH                                                                                 | National                    | both                 | 18-75                               | 18-75      | 238                  | 166   | 21                | 18    |      |
| Switzerland                | 2014-2015   | BMI Monitoring for Switzerland - Study 1                                                                         | Community                   | urban                | 5-11                                | 5-11       | 4625                 | 4657  | 4625              | 4657  | 7    |
| Switzerland                | 2014-2016   | BMI Monitoring for Switzerland - Study 2                                                                         | Subnational                 | both                 | 5-11                                | 5-11       | 6130                 | 6408  | 6130              | 6408  | 7    |
| Switzerland                | 2015        | The Swiss Conscriptio Database                                                                                   | National                    | both                 |                                     | 18-20      |                      | 32604 |                   | 26547 |      |
| Switzerland                | 2013-2016   | Bus Santé Study                                                                                                  | Subnational                 | urban                | 20-74                               | 20-74      | 331                  | 306   |                   |       |      |
| Switzerland                | 2015-2016   | BMI Monitoring for Switzerland - Study 1                                                                         | Community                   | urban                | 5-11                                | 5-11       | 3058                 | 3326  | 3058              | 3326  | 7    |
| Switzerland                | 2016-2017   | BMI Monitoring for Switzerland - Study 1                                                                         | Community                   | urban                | 5-11                                | 5-11       | 3121                 | 3457  | 3121              | 3457  | 7    |
| Switzerland                | 2017-2018   | National Studie Gesundheit und Ernährung von Primarschülern (CHILDHNS)                                           | National                    | both                 | 6-12                                | 6-12       | 1144                 | 1135  | 1144              | 1135  |      |
| <b>Southwestern Europe</b> |             |                                                                                                                  |                             |                      |                                     |            |                      |       |                   |       |      |
| Cyprus                     | 2007-2008   | Asthma Study Cyprus                                                                                              | National                    | both                 | 15-18                               | 15-18      | 490                  | 368   | 490               | 368   |      |
| Cyprus                     | 2007-2008   | Childhood asthma and atopy in Cyprus                                                                             | Subnational                 | both                 | 7-9, 13-15                          | 7-9, 13-15 | 590                  | 561   | 587               | 559   |      |
| Cyprus                     | 2007-2010   | Identification and prevention of Dietary- and lifestyle-induced health Effects In Children and infants (IDEFICS) | Community                   | urban                | 5-9                                 | 5-9        | 1106                 | 1129  | 1106              | 1129  |      |
| Cyprus                     | 2015-2016   | Childhood Obesity Surveillance Initiative 4                                                                      | National                    | urban                | 6-9                                 | 6-9        | 623                  | 687   | 623               | 685   |      |
| Cyprus                     | 2019        | Childhood Obesity Surveillance Initiative 5                                                                      | National                    | both                 | 6-10                                | 6-10       | 994                  | 1001  | 994               | 1001  |      |
| France                     | 2000        | Corpulence 7-9 ans                                                                                               | Subnational                 | both                 | 7-9                                 | 7-9        | 796                  | 786   | 796               | 786   |      |
| France                     | 2005-2007   | Etude individuelle nationale des consommations alimentaires 2 (INCA2), adults                                    | National                    | both                 | 18-79                               | 18-79      | 270                  | 179   | 37                | 28    |      |
| France                     | 2005-2007   | Etude individuelle nationale des consommations alimentaires 2 (INCA2), children and adolescents                  | National                    | both                 | 5-17                                | 5-17       | 715                  | 640   | 684               | 607   |      |
| France                     | 2007        | Corpulence 7-9 ans                                                                                               | National                    | both                 | 7-9                                 | 7-9        | 1244                 | 1281  | 1244              | 1281  |      |
| France                     | 2006-2007   | Etude Nationale Nutrition Santé                                                                                  | National                    | both                 | 5-74                                | 5-74       | 876                  | 819   | 730               | 726   |      |



| Country | Study years | Survey/study name/citation                                                                                                                               | Level of representativeness | Rural, urban or both | Age range as in NCD-RisC database * |       | Sample size (height) |        | Sample size (BMI) |        | Note |
|---------|-------------|----------------------------------------------------------------------------------------------------------------------------------------------------------|-----------------------------|----------------------|-------------------------------------|-------|----------------------|--------|-------------------|--------|------|
|         |             |                                                                                                                                                          |                             |                      | Female                              | Male  | Female               | Male   | Female            | Male   |      |
| France  | 2006-2007   | HELENA                                                                                                                                                   | Community                   | urban                | 12-17                               | 12-17 | 165                  | 122    | 165               | 122    |      |
| France  | 2012-2014   | Cohorte des consultants des Centres d'examens de santé (CONSTANCES)                                                                                      | National                    | both                 | 18-69                               | 18-69 | 3079                 | 2158   | 210               | 91     |      |
| France  | 2014-2016   | Esteban                                                                                                                                                  | National                    | both                 | 6-74                                | 6-74  | 624                  | 639    | 551               | 567    |      |
| France  | 2015-2017   | Cohorte des consultants des Centres d'examens de santé (CONSTANCES)                                                                                      | National                    | both                 | 18-69                               | 18-69 | 7842                 | 6005   | 683               | 454    |      |
| France  | 2015-2016   | Childhood Obesity Surveillance Initiative 4                                                                                                              | National                    | both                 | 7-9                                 | 7-9   | 2561                 | 2510   | 2561              | 2510   |      |
| France  | 2018-2019   | Cohorte des consultants des Centres d'examens de santé (CONSTANCES)                                                                                      | National                    | both                 | 18-69                               | 18-69 | 2937                 | 2274   | 161               | 133    |      |
| Greece  | 1997        | The Didima Study                                                                                                                                         | Community                   | rural                | 18+                                 | 18+   | 49                   | 30     | 5                 |        |      |
| Greece  | 1997        | Greece Physical Fitness Study                                                                                                                            | National                    | both                 | 8                                   | 8     | 29994                | 31586  | 29966             | 31567  |      |
| Greece  | 1998        | Greece Physical Fitness Study                                                                                                                            | National                    | both                 | 8-10                                | 8-10  | 32049                | 33354  | 32026             | 33339  |      |
| Greece  | 1997-2000   | Dietary criteria of adolescents: The role of physical activity, anthropometrics, dietetic, psychological and other factors                               | Community                   | urban                | 12-18                               | 12-18 | 505                  | 494    | 505               | 494    |      |
| Greece  | 1999        | Greece Physical Fitness Study                                                                                                                            | National                    | both                 | 8                                   | 8     | 28577                | 30083  | 28569             | 30067  |      |
| Greece  | 2000        | Greece Physical Fitness Study                                                                                                                            | National                    | both                 | 8                                   | 8     | 30384                | 32748  | 30109             | 32466  |      |
| Greece  | 2001        | Greece Physical Fitness Study                                                                                                                            | National                    | both                 | 8                                   | 8     | 30118                | 31667  | 29956             | 31504  |      |
| Greece  | 2003        | National Epidemiological Survey                                                                                                                          | National                    | both                 | 13-19                               | 13-19 | 7778                 | 6677   | 7777              | 6675   |      |
| Greece  | 2003        | Greece Physical Fitness Study                                                                                                                            | National                    | both                 | 8                                   | 8     | 31517                | 33599  | 31489             | 33570  |      |
| Greece  | 2004        | Greece Physical Fitness Study                                                                                                                            | National                    | both                 | 8                                   | 8     | 32004                | 33247  | 31989             | 33239  |      |
| Greece  | 2004-2005   | Arsakeion School Study                                                                                                                                   | Community                   | urban                | 6-18                                | 6-18  | 420                  | 358    | 420               | 358    |      |
| Greece  | 2005        | Daphne                                                                                                                                                   | Community                   | rural                | 17-18                               | 17-18 | 57                   | 41     | 57                | 41     |      |
| Greece  | 2005        | Greece Physical Fitness Study                                                                                                                            | National                    | both                 | 9                                   | 9     | 32017                | 33245  | 31940             | 33197  |      |
| Greece  | 2006        | Greece Physical Fitness Study                                                                                                                            | National                    | both                 | 9                                   | 9     | 31940                | 33540  | 31930             | 33527  |      |
| Greece  | 2005-2006   | Prevalence of hypertension and association of dietary mineral intake with blood pressure in healthy school children from Northern Greece aged 7-15 years | Community                   | urban                | 7-15                                | 7-15  | 297                  | 308    | 297               | 308    |      |
| Greece  | 2006        | Samos                                                                                                                                                    | Community                   | both                 | 5-13                                | 5-13  | 67                   | 53     | 65                | 55     |      |
| Greece  | 2007        | Greece Physical Fitness Study                                                                                                                            | National                    | both                 | 9                                   | 9     | 31809                | 33406  | 31780             | 33380  |      |
| Greece  | 2006-2007   | HELENA, Athens                                                                                                                                           | Community                   | urban                | 12-17                               | 12-17 | 162                  | 158    | 162               | 158    |      |
| Greece  | 2006-2007   | HELENA, Heraklion                                                                                                                                        | Community                   | urban                | 12-17                               | 12-17 | 149                  | 135    | 149               | 135    |      |
| Greece  | 2008        | Greece Physical Fitness Study                                                                                                                            | National                    | rural                | 8                                   | 8     | 8080                 | 8426   | 8077              | 8411   |      |
| Greece  | 2008        | Greece Physical Fitness Study                                                                                                                            | National                    | urban                | 8                                   | 8     | 27294                | 28238  | 27247             | 28189  |      |
| Greece  | 2007-2009   | Healthy Growth Study                                                                                                                                     | Subnational                 | both                 | 9-13                                | 9-13  | 1291                 | 1307   | 1291              | 1306   |      |
| Greece  | 2008-2009   | Greek Childhood Obesity Study (GRECO)                                                                                                                    | National                    | both                 | 10-12                               | 10-12 | 2164                 | 2046   | 2160              | 2033   |      |
| Greece  | 2010        | European Energy balance Research to prevent excessive weight Gain among Youth - The ENERGY-project                                                       | National                    | both                 | 10-12                               | 10-12 | 577                  | 493    | 577               | 493    |      |
| Greece  | 2010-2012   | ADONUT                                                                                                                                                   | National                    | both                 | 12-19                               | 12-19 | 18675                | 18669  | 18675             | 18668  |      |
| Greece  | 2010-2011   | Childhood Obesity Surveillance Initiative 2                                                                                                              | National                    | both                 | 7-9                                 | 7-9   | 2688                 | 2581   | 2688              | 2581   |      |
| Greece  | 2013        | Childhood Obesity Surveillance Initiative 3                                                                                                              | National                    | both                 | 7-10                                | 7-10  | 3908                 | 3965   | 3908              | 3965   |      |
| Greece  | 2013-2015   | Hellenic National Nutrition and Health Survey (HNNHS)                                                                                                    | National                    | both                 | 5+                                  | 5+    | 951                  | 740    | 318               | 303    |      |
| Greece  | 2013-2016   | National Survey of Morbidity and Risk Factors (EMENO)                                                                                                    | National                    | both                 | 18+                                 | 18+   | 238                  | 214    | 36                | 30     |      |
| Greece  | 2014-2015   | Evaluation of a web-based dietary intervention among primary school children (NUTRI-WEB Children project)                                                | Community                   | both                 | 7-12                                | 7-12  | 434                  | 387    | 433               | 387    |      |
| Greece  | 2015-2016   | Childhood Obesity Surveillance Initiative 4                                                                                                              | National                    | both                 | 7-9                                 | 7-9   | 1867                 | 1896   | 1866              | 1895   |      |
| Greece  | 2016-2017   | Erasmus plus KA2, Healthyland                                                                                                                            | Community                   | rural                | 5                                   | 5     | 9                    | 13     | 9                 | 13     |      |
| Greece  | 2017-2018   | Erasmus plus KA2, Healthyland                                                                                                                            | Community                   | rural                | 5-6                                 | 5-6   | 12                   | 33     | 12                | 33     |      |
| Greece  | 2019        | Childhood Obesity Surveillance Initiative 5                                                                                                              | National                    | both                 | 7-10                                | 7-10  | 2014                 | 2013   | 2014              | 2013   |      |
| Israel  | 1985-1989   | Israeli Conscripts                                                                                                                                       | National                    | both                 | 16-19                               | 16-19 | 383                  | 1336   | 103608            | 147044 | 1    |
| Israel  | 1990-1994   | Israeli Conscripts                                                                                                                                       | National                    | both                 | 16-19                               | 16-19 | 136928               | 188334 | 136928            | 188334 |      |
| Israel  | 1995-1999   | Israeli Conscripts                                                                                                                                       | National                    | both                 | 16-19                               | 16-19 | 144909               | 200216 | 144909            | 200216 |      |
| Israel  | 1999-2001   | Mabat First Israeli National Health and Nutrition Survey                                                                                                 | National                    | both                 | 25-64                               | 25-64 | 190                  | 190    |                   |        |      |
| Israel  | 2000-2004   | Israeli Conscripts                                                                                                                                       | National                    | both                 | 16-19                               | 16-19 | 151017               | 200485 | 151017            | 200485 |      |
| Israel  | 2003-2004   | Mabat Youth First Israeli National Health and Nutrition Survey in 7th-12th grade students                                                                | National                    | both                 | 12-18                               | 12-18 | 3151                 | 2569   | 3072              | 2553   |      |
| Israel  | 2002-2007   | Hadera District Study                                                                                                                                    | Subnational                 | urban                | 25-78                               | 25-78 | 43                   | 35     |                   |        |      |
| Israel  | 2005-2009   | Israeli Conscripts                                                                                                                                       | National                    | both                 | 16-19                               | 16-19 | 145643               | 191850 | 145638            | 191846 |      |
| Israel  | 2010-2014   | Israeli Conscripts                                                                                                                                       | National                    | both                 | 16-19                               | 16-19 | 148489               | 212434 | 148487            | 212426 |      |
| Israel  | 2014-2016   | Mabat Second Israeli National Health and Nutrition Survey                                                                                                | National                    | both                 | 18-64                               | 18-64 | 282                  | 284    | 29                | 31     |      |
| Israel  | 2015-2016   | Mabat Youth Second Israeli National Health and Nutrition Survey in 7th-12th grade students                                                               | National                    | both                 | 12-18                               | 12-18 | 2430                 | 2256   | 2415              | 2221   |      |
| Israel  | 2015-2019   | Israeli Conscripts                                                                                                                                       | National                    | both                 | 16-19                               | 16-19 | 152147               | 198520 | 152147            | 198516 |      |
| Israel  | 2018-2019   | Childhood Obesity Surveillance Initiative 5                                                                                                              | National                    | both                 | 6-7                                 | 6-7   | 73561                | 73724  | 73561             | 73724  |      |
| Italy   | 1980-1982   | Po river delta epidemiological study - first survey                                                                                                      | Community                   | rural                | 8-64                                | 8-64  | 86                   | 77     |                   |        |      |
| Italy   | 1983-1985   | Gubbio Study                                                                                                                                             | Community                   | both                 | 5+                                  | 5+    | 226                  | 274    |                   |        |      |
| Italy   | 1985-1988   | Pisa epidemiological study - first survey                                                                                                                | Community                   | urban                | 5-90                                | 5-90  | 242                  | 296    |                   |        |      |
| Italy   | 1989        | Ventimiglia Heart Study                                                                                                                                  | Community                   | rural                | 6+                                  | 6+    | 124                  | 119    |                   |        |      |
| Italy   | 1988-1991   | Po river delta epidemiological study - second survey                                                                                                     | Community                   | rural                | 8-73                                | 8-73  | 253                  | 251    | 253               | 251    |      |
| Italy   | 1989-1992   | Gubbio Study                                                                                                                                             | Community                   | both                 | 10+                                 | 10+   | 166                  | 212    | 166               | 212    |      |
| Italy   | 1991-1993   | Pisa epidemiological study - second survey                                                                                                               | Community                   | urban                | 8-97                                | 8-97  | 146                  | 166    | 146               | 166    |      |
| Italy   | 1998-1999   | Progetto VIP                                                                                                                                             | Community                   | both                 | 25-74                               | 25-74 | 60                   | 60     |                   |        |      |
| Italy   | 2000        | Sorveglianza Nutrizionale Infanzia e Adolescenza (SoNIA)                                                                                                 | Subnational                 | both                 | 13-15                               | 13-15 | 244                  | 236    | 244               | 236    |      |
| Italy   | 2000-2001   | Sorveglianza Nutrizionale Infanzia e Adolescenza (SoNIA)                                                                                                 | Subnational                 | both                 | 8-9                                 | 8-9   | 413                  | 444    | 413               | 444    |      |
| Italy   | 2003        | Sorveglianza Nutrizionale Infanzia e Adolescenza (SoNIA)                                                                                                 | Subnational                 | both                 | 5-6                                 | 5-6   | 1327                 | 1355   | 1327              | 1355   |      |
| Italy   | 2001-2007   | Gubbio Study                                                                                                                                             | Community                   | both                 | 26+                                 | 26+   | 27                   | 31     |                   |        |      |

| Country  | Study years | Survey/study name/citation                                                                                                                                                                            | Level of representativeness | Rural, urban or both | Age range as in NCD-RisC database * |       | Sample size (height) |        | Sample size (BMI) |       | Note |
|----------|-------------|-------------------------------------------------------------------------------------------------------------------------------------------------------------------------------------------------------|-----------------------------|----------------------|-------------------------------------|-------|----------------------|--------|-------------------|-------|------|
|          |             |                                                                                                                                                                                                       |                             |                      | Female                              | Male  | Female               | Male   | Female            | Male  |      |
| Italy    | 2005-2007   | Moli-family Study                                                                                                                                                                                     | Subnational                 | both                 | 14+                                 | 14+   | 127                  | 97     | 54                | 41    |      |
| Italy    | 2006-2007   | HELENA                                                                                                                                                                                                | Community                   | urban                | 12-17                               | 12-17 | 185                  | 119    | 185               | 119   |      |
| Italy    | 2008        | Childhood Obesity Surveillance Initiative 1                                                                                                                                                           | National                    | both                 | 8-9                                 | 8-9   | 3788                 | 4006   | 3788              | 4005  |      |
| Italy    | 2007-2010   | Identification and prevention of Dietary- and lifestyle-induced health Effects In Children and infants (IDEFICS)                                                                                      | Community                   | urban                | 5-9                                 | 5-9   | 847                  | 893    | 847               | 893   |      |
| Italy    | 2009        | The ZOOM8 study: nutrition and physical activity of primary school children                                                                                                                           | National                    | both                 | 6-11                                | 6-11  | 1018                 | 1059   | 1018              | 1059  |      |
| Italy    | 2008-2009   | Progetto VIP                                                                                                                                                                                          | Community                   | both                 | 25-74                               | 25-74 | 49                   | 46     |                   |       |      |
| Italy    | 2009-2010   | Grosso et al., J Epidemiol 24(4):327-33, 2014                                                                                                                                                         | Community                   | both                 | 19+                                 | 19+   | 152                  | 105    | 10                | 8     |      |
| Italy    | 2010        | Childhood Obesity Surveillance Initiative 2                                                                                                                                                           | National                    | both                 | 8-9                                 | 8-9   | 20011                | 21282  | 20007             | 21280 |      |
| Italy    | 2009-2011   | Pisa epidemiological study - third survey                                                                                                                                                             | Community                   | urban                | 6+                                  | 6+    | 55                   | 54     | 22                | 19    |      |
| Italy    | 2010-2012   | CArdiovascular risk MEtabolic syndrome LIver and Autoimmunity diseases (CA.ME.L.I.A)                                                                                                                  | Community                   | both                 | 18-75                               | 18-75 | 78                   | 56     | 10                | 10    |      |
| Italy    | 2011        | Grosso et al., Nutrients 5(12):4908-23, 2013                                                                                                                                                          | Community                   | both                 | 13-16                               | 13-16 | 508                  | 627    | 508               | 627   |      |
| Italy    | 2011        | CONVERGI Study                                                                                                                                                                                        | Community                   | urban                | 13-19                               | 13-19 | 269                  | 159    | 269               | 159   |      |
| Italy    | 2011-2012   | Alimentazione e stile di vita negli ADolEscenti (Nutrition and lifestyle in adolescents)                                                                                                              | Subnational                 | both                 | 15-16                               | 15-16 | 194                  | 149    | 194               | 149   |      |
| Italy    | 2012        | Childhood Obesity Surveillance Initiative 3                                                                                                                                                           | National                    | both                 | 8-9                                 | 8-9   | 22188                | 22919  | 22186             | 22917 |      |
| Italy    | 2012-2014   | Mistretta et al., Obes Res Clin Pract 11(2):215-226, 2017                                                                                                                                             | Community                   | urban                | 11-16                               | 11-16 | 758                  | 885    | 753               | 878   |      |
| Italy    | 2014        | OKKio alla SALUTE                                                                                                                                                                                     | National                    | both                 | 8-9                                 | 8-9   | 22855                | 24462  | 22855             | 24457 |      |
| Italy    | 2014-2016   | Mediterranean healthy Eating, Aging and Lifestyles (MEAL) study                                                                                                                                       | Subnational                 | urban                | 20+                                 | 20+   | 188                  | 114    |                   |       |      |
| Italy    | 2015-2016   | Childhood Obesity Surveillance Initiative 4                                                                                                                                                           | National                    | both                 | 8-9                                 | 8-9   | 21457                | 22737  | 21454             | 22732 |      |
| Italy    | 2016        | EVA Tyrol Study South Italy                                                                                                                                                                           | Subnational                 | both                 | 14-18                               | 14-18 | 189                  | 97     | 189               | 97    |      |
| Italy    | 2018-2019   | Progetto VIP                                                                                                                                                                                          | Community                   | both                 | 25-74                               | 25-74 | 60                   | 60     |                   |       |      |
| Italy    | 2019        | Childhood Obesity Surveillance Initiative 5                                                                                                                                                           | National                    | both                 | 8-9                                 | 8-9   | 22469                | 23439  | 22462             | 23432 |      |
| Malta    | 2008        | Childhood Obesity Surveillance Initiative 1                                                                                                                                                           | National                    | both                 | 6                                   | 6     | 1031                 | 1084   | 1031              | 1084  |      |
| Malta    | 2010        | Childhood Obesity Surveillance Initiative 2                                                                                                                                                           | National                    | both                 | 6                                   | 6     | 1170                 | 1151   | 1170              | 1151  |      |
| Malta    | 2013        | Childhood Obesity Surveillance Initiative 3                                                                                                                                                           | National                    | both                 | 7-8                                 | 7-8   | 1692                 | 1754   | 1692              | 1753  |      |
| Malta    | 2014-2016   | SAHTEK - The University of Malta Health and Wellbeing Study                                                                                                                                           | National                    | both                 | 18-70                               | 18-70 | 120                  | 76     | 5                 | 5     |      |
| Malta    | 2015-2016   | Childhood Obesity Surveillance Initiative 4                                                                                                                                                           | National                    | both                 | 7-8                                 | 7-8   | 1906                 | 2056   | 1905              | 2056  |      |
| Malta    | 2019        | Childhood Obesity Surveillance Initiative 5                                                                                                                                                           | National                    | both                 | 7-8                                 | 7-8   | 1998                 | 2087   | 1998              | 2085  |      |
| Portugal | 1980-1982   | Growth of children from the countryside of Portugal                                                                                                                                                   | Community                   | both                 | 6-15                                | 6-15  | 424                  | 414    |                   |       |      |
| Portugal | 1987        | Body-Mass Index of Portuguese Conscripts                                                                                                                                                              | National                    | both                 |                                     | 18-20 |                      |        |                   | 22582 | 1    |
| Portugal | 1988        | Body-Mass Index of Portuguese Conscripts                                                                                                                                                              | National                    | both                 |                                     | 18-20 |                      |        |                   | 22750 | 1    |
| Portugal | 1989        | Body-Mass Index of Portuguese Conscripts                                                                                                                                                              | National                    | both                 |                                     | 18-20 |                      | 124    |                   | 24259 | 1    |
| Portugal | 1990        | Body-Mass Index of Portuguese Conscripts                                                                                                                                                              | National                    | both                 |                                     | 18-20 |                      | 207    |                   | 207   |      |
| Portugal | 1991        | Body-Mass Index of Portuguese Conscripts                                                                                                                                                              | National                    | both                 |                                     | 18-20 |                      | 17673  |                   | 16284 |      |
| Portugal | 1992        | Body-Mass Index of Portuguese Conscripts                                                                                                                                                              | National                    | both                 |                                     | 18-20 |                      | 57237  |                   | 34264 |      |
| Portugal | 1993        | Body-Mass Index of Portuguese Conscripts                                                                                                                                                              | National                    | both                 |                                     | 18-20 |                      | 69414  |                   | 56888 |      |
| Portugal | 1994        | Body-Mass Index of Portuguese Conscripts                                                                                                                                                              | National                    | both                 |                                     | 18-20 |                      | 63224  |                   | 49229 |      |
| Portugal | 1995        | Body-Mass Index of Portuguese Conscripts                                                                                                                                                              | National                    | both                 |                                     | 18-20 |                      | 81168  |                   | 62025 |      |
| Portugal | 1996        | Body-Mass Index of Portuguese Conscripts                                                                                                                                                              | National                    | both                 |                                     | 18-21 |                      | 121229 |                   | 86907 |      |
| Portugal | 1997        | Body-Mass Index of Portuguese Conscripts                                                                                                                                                              | National                    | both                 |                                     | 18-21 |                      | 59790  |                   | 49567 |      |
| Portugal | 1998        | Body-Mass Index of Portuguese Conscripts                                                                                                                                                              | National                    | both                 |                                     | 18-21 |                      | 40092  |                   | 29805 |      |
| Portugal | 1999        | Body-Mass Index of Portuguese Conscripts                                                                                                                                                              | National                    | both                 |                                     | 18-21 |                      | 52572  |                   | 41300 |      |
| Portugal | 1998-2000   | European Youth Heart Study                                                                                                                                                                            | Community                   | both                 | 9-16                                | 9-16  | 535                  | 554    | 535               | 554   |      |
| Portugal | 2000        | Body-Mass Index of Portuguese Conscripts                                                                                                                                                              | National                    | both                 |                                     | 18-21 |                      | 51440  |                   | 40114 |      |
| Portugal | 1999-2003   | EPIPorto Study                                                                                                                                                                                        | Community                   | urban                | 18+                                 | 18+   | 126                  | 86     | 10                | 5     |      |
| Portugal | 2004        | Growth of adolescents in Coimbra                                                                                                                                                                      | Community                   | both                 | 9-16                                | 9-16  | 409                  | 265    | 408               | 265   |      |
| Portugal | 2003-2004   | EPITeen - Epidemiological Health Investigation of Teenagers in Porto                                                                                                                                  | Community                   | urban                | 13-14                               | 13-14 | 1049                 | 983    | 1048              | 981   |      |
| Portugal | 2004        | Growth of adolescents in Gouveia                                                                                                                                                                      | Community                   | rural                | 10-19                               | 10-19 | 246                  | 238    | 246               | 238   |      |
| Portugal | 2003-2005   | Estudo de Prevalência da Obesidade e Consumos Alimentares em Portugal                                                                                                                                 | National                    | both                 | 18-64                               | 18-64 | 1329                 | 863    | 293               | 171   |      |
| Portugal | 2007        | Growth of adolescents in Tondela                                                                                                                                                                      | Community                   | rural                | 6-19                                | 6-19  | 312                  | 315    | 312               | 314   |      |
| Portugal | 2008        | Azorean Physical Activity and Health Study II                                                                                                                                                         | Subnational                 | urban                | 15-18                               | 15-18 | 893                  | 608    | 893               | 608   |      |
| Portugal | 2008        | Childhood Obesity Surveillance Initiative 1                                                                                                                                                           | National                    | both                 | 6-8                                 | 6-8   | 1792                 | 1799   | 1792              | 1799  |      |
| Portugal | 2007-2008   | EPITeen - Epidemiological Health Investigation of Teenagers in Porto                                                                                                                                  | Community                   | urban                | 16-17                               | 16-17 | 1261                 | 1192   | 1251              | 1186  |      |
| Portugal | 2007-2008   | European Youth Heart Study                                                                                                                                                                            | Community                   | both                 | 8-17                                | 8-17  | 311                  | 315    | 311               | 315   |      |
| Portugal | 2007-2010   | Promoção do Exercício e Saúde no Sedentarismo e Obesidade da Adolescência (PESSOA Program)                                                                                                            | Community                   | urban                | 9-16                                | 9-16  | 1813                 | 1931   | 1813              | 1931  |      |
| Portugal | 2007-2009   | Portuguese National Survey of Physical Activity and Physical Fitness                                                                                                                                  | National                    | both                 | 9+                                  | 9+    | 9536                 | 8853   | 8747              | 8123  |      |
| Portugal | 2007-2008   | Primary schools health promotion                                                                                                                                                                      | Community                   | urban                | 6-12                                | 6-12  | 238                  | 224    | 238               | 224   |      |
| Portugal | 2009        | Bracara Study                                                                                                                                                                                         | Community                   | urban                | 8-14                                | 8-14  | 336                  | 398    | 336               | 398   |      |
| Portugal | 2007-2010   | The Midland Adolescent Lifestyle Study                                                                                                                                                                | Subnational                 | both                 | 12-16                               | 12-16 | 235                  | 196    | 235               | 196   |      |
| Portugal | 2009-2010   | Portuguese Prevalence Study of Obesity in Childhood                                                                                                                                                   | National                    | both                 | 5-10                                | 5-10  | 6864                 | 6543   | 6864              | 6541  |      |
| Portugal | 2010        | Childhood Obesity Surveillance Initiative 2                                                                                                                                                           | National                    | both                 | 6-8                                 | 6-8   | 1688                 | 1700   | 1688              | 1700  |      |
| Portugal | 2010-2012   | Promoção do Exercício e Saúde no Sedentarismo e Obesidade da Adolescência (PESSOA Program)                                                                                                            | Community                   | urban                | 9-14                                | 9-14  | 275                  | 287    | 275               | 287   |      |
| Portugal | 2008-2013   | Preschool Physical Activity, Body Composition and Lifestyle Study (PRESTYLE)                                                                                                                          | Community                   | urban                | 5-6                                 | 5-6   | 635                  | 703    | 607               | 651   |      |
| Portugal | 2011-2012   | The association of childhood obesity with asthma and rhinitis symptoms in 6-8years old children living in the Coimbra district, Portugal: the role of environmental, family and socioeconomic factors | Community                   | both                 | 5-9                                 | 5-9   | 465                  | 439    | 465               | 439   |      |
| Portugal | 2011-2013   | International Study of Childhood Obesity, Lifestyle and the Environment (ISCOLE)                                                                                                                      | Community                   | urban                | 9-11                                | 9-11  | 419                  | 358    | 419               | 358   |      |
| Portugal | 2011-2013   | Environmental Support for Leisure and Active Transport                                                                                                                                                | Subnational                 | urban                | 10-15                               | 10-15 | 340                  | 294    | 340               | 294   |      |

| Country                            | Study years | Survey/study name/citation                                                                                                                                                        | Level of representativeness | Rural, urban or both | Age range as in NCD-RisC database * |       | Sample size (height) |       | Sample size (BMI) |       | Note |
|------------------------------------|-------------|-----------------------------------------------------------------------------------------------------------------------------------------------------------------------------------|-----------------------------|----------------------|-------------------------------------|-------|----------------------|-------|-------------------|-------|------|
|                                    |             |                                                                                                                                                                                   |                             |                      | Female                              | Male  | Female               | Male  | Female            | Male  |      |
| Portugal                           | 2011-2013   | EPITeen - Epidemiological Health Investigation of Teenagers in Porto                                                                                                              | Community                   | urban                | 20-23                               | 20-23 | 905                  | 855   |                   |       |      |
| Portugal                           | 2013        | Childhood Obesity Surveillance Initiative 3                                                                                                                                       | National                    | both                 | 6-8                                 | 6-8   | 2973                 | 2946  | 2973              | 2946  |      |
| Portugal                           | 2011-2014   | Longitudinal Analysis of Biomarkers and Environmental Determinants of Physical activity (LABMED Study)                                                                            | Subnational                 | urban                | 12-18                               | 12-18 | 460                  | 531   | 460               | 531   |      |
| Portugal                           | 2013        | Childhood obesity in LouSao                                                                                                                                                       | Community                   | rural                | 5-14                                | 5-14  | 418                  | 444   | 418               | 444   |      |
| Portugal                           | 2013-2014   | Cultural, social, economic, and environmental factors that can influence children's sport participation and obesity levels                                                        | Community                   | urban                | 6-10                                | 6-10  | 408                  | 385   | 408               | 385   |      |
| Portugal                           | 2015        | Inquérito Nacional de Saúde com Exame Físico (INSEF)                                                                                                                              | National                    | both                 | 25-74                               | 25-74 | 179                  | 145   |                   |       |      |
| Portugal                           | 2015-2016   | Childhood Obesity Surveillance Initiative 4                                                                                                                                       | National                    | both                 | 6-8                                 | 6-8   | 3358                 | 3314  | 3358              | 3314  |      |
| Portugal                           | 2016-2017   | Overweight and obesity and their associated factors among early adolescence school children in urban and rural Portugal (rural only)                                              | National                    | both                 | 10-12                               | 10-12 | 33                   | 38    | 33                | 38    |      |
| Portugal                           | 2016-2017   | Portuguese Prevalence Study of Obesity in Childhood                                                                                                                               | Subnational                 | both                 | 5-10                                | 5-10  | 3223                 | 3205  | 3223              | 3205  |      |
| Portugal                           | 2018-2019   | Childhood Obesity Surveillance Initiative 5                                                                                                                                       | National                    | both                 | 6-8                                 | 6-8   | 3452                 | 3644  | 3429              | 3626  |      |
| Spain                              | 1989        | Cardiovascular Risk Factors Study in Catalonia                                                                                                                                    | Subnational                 | both                 | 15+                                 | 15+   | 22                   | 17    |                   |       |      |
| Spain                              | 1991-1993   | Encuesta de Factores de Riesgo Cardiovascular en la Región de Murcia (Cardiovascular Risk Factors Survey)                                                                         | Subnational                 | both                 | 18-69                               | 18-69 | 11                   | 9     | 11                | 9     |      |
| Spain                              | 1994-1995   | Encuesta de Nutrición y Salud Comunidad Valenciana 1994-95 (ENCV)                                                                                                                 | Subnational                 | urban                | 15+                                 | 15+   | 124                  | 109   | 124               | 109   |      |
| Spain                              | 1998-2000   | EnKID study                                                                                                                                                                       | National                    | both                 | 5-24                                | 5-24  | 1730                 | 1452  | 1120              | 1030  |      |
| Spain                              | 2001-2002   | Catalan Health Interview Survey                                                                                                                                                   | Subnational                 | both                 | 18-74                               | 18-74 | 157                  | 102   | 22                | 15    |      |
| Spain                              | 2001-2003   | Diabetes, Nutrición y Obesidad en la población adulta de la Región de Murcia (DINO)                                                                                               | Subnational                 | both                 | 20+                                 | 20+   | 157                  | 135   |                   |       |      |
| Spain                              | 2000-2005   | CDC of the Canary Islands                                                                                                                                                         | Subnational                 | both                 | 18-75                               | 18-75 | 647                  | 484   | 71                | 36    |      |
| Spain                              | 2004        | Cardiovascular Risk Study in Castilla y León (RECCyL)                                                                                                                             | Subnational                 | both                 | 15+                                 | 15+   | 340                  | 311   | 88                | 96    |      |
| Spain                              | 2004        | Vioque J et al., Obesity 16(3):664-70, 2008                                                                                                                                       | Community                   | urban                | 24+                                 | 24+   | 13                   | 12    |                   |       |      |
| Spain                              | 2006-2007   | HELENA                                                                                                                                                                            | Community                   | urban                | 12-17                               | 12-17 | 193                  | 188   | 193               | 188   |      |
| Spain                              | 2006-2008   | Biblióni Mdel et al., Br J Nutr 103(1):99-106, 2010                                                                                                                               | Community                   | both                 | 43070                               | 43070 |                      |       | 652               | 571   |      |
| Spain                              | 2007-2009   | Harmonizing Equation of Risk in Mediterranean countries Extremadura (HERMEX)                                                                                                      | Subnational                 | both                 | 25-79                               | 25-79 | 101                  | 72    |                   |       |      |
| Spain                              | 2008-2010   | Study on Nutrition and Cardiovascular Risk in Spain                                                                                                                               | National                    | both                 | 18+                                 | 18+   | 1147                 | 1001  | 164               | 147   |      |
| Spain                              | 2007-2010   | Identification and prevention of Dietary- and lifestyle-induced health Effects In Children and infants (IDEFICS)                                                                  | Community                   | urban                | 5-9                                 | 5-9   | 468                  | 474   | 468               | 474   |      |
| Spain                              | 2009        | Cardiovascular Risk Study in Castilla y León (RECCyL)                                                                                                                             | Subnational                 | both                 | 20+                                 | 20+   | 128                  | 105   |                   |       |      |
| Spain                              | 2010        | European Energy balance Research to prevent excessive weight Gain among Youth - The ENERGY-project                                                                                | Subnational                 | urban                | 10-12                               | 10-12 | 520                  | 479   | 520               | 479   |      |
| Spain                              | 2010-2011   | Alimentación, Actividad Física, Desarrollo Infantil y Obesidad (ALADINO); Childhood Obesity Surveillance Initiative 2                                                             | National                    | both                 | 6-9                                 | 6-9   | 3311                 | 3343  | 3311              | 3341  |      |
| Spain                              | 2012        | Effects of a lifestyle intervention on the prevention of childhood obesity: a community-based model                                                                               | Subnational                 | urban                | 8-12                                | 8-12  | 1081                 | 1171  | 1081              | 1171  |      |
| Spain                              | 2013        | ANIBES Study                                                                                                                                                                      | National                    | both                 | 9-75                                | 9-75  | 343                  | 443   | 188               | 301   |      |
| Spain                              | 2012-2013   | Brain Development and Air Pollution Ultrafine Particles in School Children-BREATHE Project                                                                                        | Subnational                 | urban                | 7-12                                | 7-12  | 1325                 | 1338  | 1325              | 1338  |      |
| Spain                              | 2013        | Alimentación, Actividad Física, Desarrollo Infantil y Obesidad (ALADINO); Childhood Obesity Surveillance Initiative 3                                                             | National                    | both                 | 7-8                                 | 7-8   | 1673                 | 1613  | 1673              | 1613  |      |
| Spain                              | 2012-2013   | Infancia y Medio Ambiente (Childhood and Environment) Project - Menorca                                                                                                           | Subnational                 | both                 | 14-15                               | 14-15 | 165                  | 162   | 165               | 162   |      |
| Spain                              | 2012-2013   | Infancia y Medio Ambiente (Childhood and Environment) Birth Cohort study - Sabadell                                                                                               | Subnational                 | urban                | 5-7                                 | 5-7   | 260                  | 280   | 260               | 280   | 8    |
| Spain                              | 2012-2013   | Infancia y Medio Ambiente (Childhood and Environment) Project - Valencia                                                                                                          | Subnational                 | both                 | 7-8                                 | 7-8   | 232                  | 229   | 232               | 229   |      |
| Spain                              | 2013-2015   | Infancia y Medio Ambiente (Childhood and Environment) Project - Valencia                                                                                                          | Subnational                 | both                 | 8-9                                 | 8-9   | 199                  | 210   | 199               | 210   |      |
| Spain                              | 2013-2014   | Effects of a lifestyle intervention on the prevention of childhood obesity: a community-based model                                                                               | Subnational                 | urban                | 9-13                                | 9-13  | 1004                 | 1086  | 1004              | 1086  |      |
| Spain                              | 2014        | Cardiovascular Risk Study in Castilla y León (RECCyL)                                                                                                                             | Subnational                 | both                 | 20+                                 | 20+   | 52                   | 52    |                   |       |      |
| Spain                              | 2013-2016   | Infancia y Medio Ambiente (Childhood and Environment) Birth Cohort study - Sabadell                                                                                               | Subnational                 | urban                | 7-10                                | 7-10  | 236                  | 253   | 236               | 253   |      |
| Spain                              | 2015-2016   | Alimentación, Actividad Física, Desarrollo Infantil y Obesidad (ALADINO); Childhood Obesity Surveillance Initiative 4                                                             | National                    | both                 | 6-9                                 | 6-9   | 5367                 | 5532  | 5367              | 5532  |      |
| Spain                              | 2015-2016   | Infancia y Medio Ambiente (Childhood and Environment) Project - Gipuzkoa                                                                                                          | Subnational                 | both                 | 7-8                                 | 7-8   | 195                  | 195   | 195               | 195   |      |
| Spain                              | 2015-2017   | Infancia y Medio Ambiente (Childhood and Environment) Project - Valencia                                                                                                          | Subnational                 | both                 | 9-12                                | 9-12  | 198                  | 181   | 198               | 181   |      |
| Spain                              | 2016-2018   | Infancia y Medio Ambiente (Childhood and Environment) Birth Cohort study - Sabadell                                                                                               | Subnational                 | urban                | 9-12                                | 9-12  | 239                  | 256   | 239               | 256   |      |
| Spain                              | 2018-2019   | Infancia y Medio Ambiente (Childhood and Environment) Project - Gipuzkoa                                                                                                          | Subnational                 | both                 | 10-11                               | 10-11 | 204                  | 174   | 204               | 174   |      |
| Spain                              | 2018        | Childhood obesity cohort study of Sant Boi de Llobregat - SantBoiSà                                                                                                               | Community                   | urban                | 5-10                                | 5-10  | 266                  | 299   | 266               | 299   |      |
| Spain                              | 2019        | Alimentación, Actividad Física, Desarrollo Infantil y Obesidad (ALADINO); Childhood Obesity Surveillance Initiative 5                                                             | National                    | both                 | 6-9                                 | 6-9   | 8152                 | 8513  | 8151              | 8512  |      |
| Spain                              | 2019        | Physical Activity, Sedentarism and Obesity of Spanish youth                                                                                                                       | National                    | both                 | 5-19                                | 5-19  | 1936                 | 1836  | 1936              | 1836  |      |
| <b>Latin America and Caribbean</b> |             |                                                                                                                                                                                   |                             |                      |                                     |       |                      |       |                   |       |      |
| <i>Andean Latin America</i>        |             |                                                                                                                                                                                   |                             |                      |                                     |       |                      |       |                   |       |      |
| Bolivia                            | 1998        | DHS                                                                                                                                                                               | National                    | both                 | 20-49                               |       | 2094                 |       |                   |       |      |
| Bolivia                            | 2003        | DHS                                                                                                                                                                               | National                    | both                 | 15-49                               |       | 9505                 |       | 3625              |       |      |
| Bolivia                            | 2005-2007   | Cardiovascular and metabolic syndrome risk assessment of Bolivian school children and adolescents - Relationships to obesity, diabetes, income, food intake and physical activity | National                    | both                 | 12-18                               | 12-18 | 1849                 | 1504  | 1841              | 1499  |      |
| Bolivia                            | 2008        | DHS                                                                                                                                                                               | National                    | both                 | 15-49                               |       | 8826                 |       | 3239              |       |      |
| Bolivia                            | 2019        | STEPS                                                                                                                                                                             | National                    | both                 | 18-69                               | 18-69 | 636                  | 405   | 105               | 65    |      |
| Ecuador                            | 2004        | Encuesta Demografica y de Salud Materno e Infantil/ Reproductive Health Survey                                                                                                    | National                    | both                 | 15-49                               |       | 2443                 |       | 308               |       |      |
| Ecuador                            | 2004-2005   | Cardiovascular Risk factors Multiple Evaluation in Latin America (CARMELA)                                                                                                        | Community                   | urban                | 25-64                               | 25-64 | 190                  | 195   |                   |       |      |
| Ecuador                            | 2008-2009   | Food Nutrition and Health                                                                                                                                                         | Community                   | both                 | 10-16                               | 10-16 | 375                  | 382   | 374               | 379   |      |
| Ecuador                            | 2011-2013   | Encuesta Nacional de Salud y Nutrición (ENSANUT)                                                                                                                                  | National                    | both                 | 5-59                                | 5-59  | 15100                | 14822 | 9292              | 10711 |      |
| Ecuador                            | 2014-2015   | Latin American Study of Nutrition and Health (ELANS)                                                                                                                              | National                    | urban                | 15-65                               | 15-65 | 243                  | 244   | 75                | 87    |      |
| Ecuador                            | 2018        | Encuesta Nacional de Salud y Nutrición (ENSANUT)                                                                                                                                  | National                    | both                 | 5+                                  | 5+    | 37486                | 34423 | 22970             | 23716 |      |
| Ecuador                            | 2018        | STEPS                                                                                                                                                                             | National                    | both                 | 18-69                               | 18-69 | 634                  | 509   | 109               | 115   |      |
| Peru                               | 1996        | DHS                                                                                                                                                                               | National                    | both                 | 20-49                               |       | 5656                 |       |                   |       |      |
| Peru                               | 2000        | DHS                                                                                                                                                                               | National                    | both                 | 15-49                               |       | 14126                |       | 5340              |       |      |
| Peru                               | 2003        | Factores de Riesgo de Enfermedades No Transmisibles                                                                                                                               | Community                   | urban                | 16+                                 | 16+   | 105                  | 102   | 12                | 23    |      |
| Peru                               | 2004        | Factores de Riesgo de Enfermedades No Transmisibles                                                                                                                               | Community                   | urban                | 15+                                 | 15+   | 132                  | 71    | 28                | 26    |      |
| Peru                               | 2004-2006   | DHS                                                                                                                                                                               | National                    | both                 | 15-49                               |       | 3034                 |       | 1175              |       |      |

| Country               | Study years | Survey/study name/citation                                                                                                                         | Level of representativeness | Rural, urban or both | Age range as in NCD-RisC database * |       | Sample size (height) |       | Sample size (BMI) |       | Note |
|-----------------------|-------------|----------------------------------------------------------------------------------------------------------------------------------------------------|-----------------------------|----------------------|-------------------------------------|-------|----------------------|-------|-------------------|-------|------|
|                       |             |                                                                                                                                                    |                             |                      | Female                              | Male  | Female               | Male  | Female            | Male  |      |
| Peru                  | 2005        | Factores de Riesgo de Enfermedades No Transmisibles                                                                                                | Community                   | urban                | 15+                                 | 15+   | 160                  | 78    | 42                | 24    |      |
| Peru                  | 2004-2005   | Cardiovascular Risk factors Multiple Evaluation in Latin America (CARMELA)                                                                         | Community                   | urban                | 25-64                               | 25-64 | 239                  | 219   |                   |       |      |
| Peru                  | 2004-2005   | Encuesta Nacional de Indicadores Nutricionales, Bioquímicos, Socioeconómicos y Culturales Relacionados con las Enfermedades Crónicas Degenerativas | National                    | both                 | 20+                                 | 20+   | 549                  | 474   |                   |       |      |
| Peru                  | 2006        | Factores de Riesgo de Enfermedades No Transmisibles                                                                                                | Community                   | urban                | 15+                                 | 15+   | 320                  | 256   | 98                | 87    |      |
| Peru                  | 2007-2008   | Monitoreo de Indicadores Nutricionales en la ENAHO 2007-2008                                                                                       | National                    | both                 | 5+                                  | 5+    | 8670                 | 8344  | 5807              | 5965  |      |
| Peru                  | 2007-2008   | DHS                                                                                                                                                | National                    | both                 | 15-49                               |       | 10850                |       | 3940              |       |      |
| Peru                  | 2007-2010   | Monitoreo Nacional de Indicadores Nutricionales                                                                                                    | National                    | both                 | 12-49                               |       | 1759                 |       | 504               |       |      |
| Peru                  | 2009        | DHS                                                                                                                                                | National                    | both                 | 15-49                               |       | 11951                |       | 4409              |       |      |
| Peru                  | 2009-2011   | Monitoreo de Indicadores Nutricionales en la ENAHO 2009-2010                                                                                       | National                    | both                 | 5+                                  | 5+    | 15477                | 14729 | 10943             | 11184 |      |
| Peru                  | 2010        | DHS                                                                                                                                                | National                    | both                 | 15-49                               |       | 11416                |       | 4358              |       |      |
| Peru                  | 2010        | Global School-based Student Health Survey                                                                                                          | National                    | both                 | 13-17                               | 13-17 | 1306                 | 1267  | 1306              | 1267  |      |
| Peru                  | 2011        | DHS                                                                                                                                                | National                    | both                 | 15-49                               |       | 11180                |       | 4171              |       |      |
| Peru                  | 2011-2012   | Monitoreo de Indicadores Nutricionales en la ENAHO 2011                                                                                            | National                    | both                 | 5+                                  | 5+    | 4006                 | 3730  | 2820              | 2816  |      |
| Peru                  | 2012        | DHS                                                                                                                                                | National                    | both                 | 15-49                               |       | 12002                |       | 4551              |       |      |
| Peru                  | 2013        | DHS                                                                                                                                                | National                    | both                 | 15+                                 | 15+   | 11280                | 850   | 4093              | 309   |      |
| Peru                  | 2014        | DHS                                                                                                                                                | National                    | both                 | 15+                                 | 15+   | 11558                | 3685  | 4176              | 1386  |      |
| Peru                  | 2014        | Launching a salt substitute to reduce blood pressure at the population level: a cluster randomized stepped wedge trial in Peru                     | Community                   | both                 | 18+                                 | 18+   | 334                  | 286   | 54                | 51    |      |
| Peru                  | 2015        | DHS                                                                                                                                                | National                    | both                 | 15+                                 | 15+   | 17724                | 4806  | 5190              | 1496  |      |
| Peru                  | 2014-2015   | Latin American Study of Nutrition and Health (ELANS)                                                                                               | National                    | urban                | 15-65                               | 15-65 | 232                  | 251   | 67                | 81    |      |
| Peru                  | 2016        | DHS                                                                                                                                                | National                    | both                 | 15+                                 | 15+   | 16141                | 4400  | 4674              | 1418  |      |
| Peru                  | 2017        | DHS                                                                                                                                                | National                    | both                 | 15+                                 | 15+   | 16855                | 4469  | 4743              | 1354  |      |
| Peru                  | 2018        | DHS                                                                                                                                                | National                    | both                 | 15+                                 | 15+   | 17282                | 4241  | 4807              | 1355  |      |
| Peru                  | 2017-2018   | Vigilancia Alimentario Nutricional por Etapas de Vida (VIANEV) 2017-2018                                                                           | National                    | both                 | 18-59                               | 18-59 | 163                  | 136   | 13                | 16    |      |
| Peru                  | 2019        | DHS                                                                                                                                                | National                    | both                 | 15+                                 | 15+   | 16403                | 4132  | 4732              | 1306  |      |
| Peru                  | 2020        | DHS                                                                                                                                                | National                    | both                 | 15+                                 | 15+   | 10982                | 2861  | 3442              | 1025  |      |
| <b>Caribbean</b>      |             |                                                                                                                                                    |                             |                      |                                     |       |                      |       |                   |       |      |
| Antigua and Barbuda   | 2009        | Global School-based Student Health Survey                                                                                                          | National                    | both                 | 13-17                               | 13-17 | 122                  | 70    | 122               | 70    |      |
| Bahamas               | 2011-2012   | STEPS                                                                                                                                              | National                    | both                 | 25-64                               | 25-64 | 132                  | 111   |                   |       |      |
| Bahamas               | 2013        | Global School-based Student Health Survey                                                                                                          | National                    | both                 | 13-17                               | 13-17 | 533                  | 460   | 533               | 460   |      |
| Barbados              | 2011        | Global School-based Student Health Survey                                                                                                          | National                    | both                 | 13-17                               | 13-17 | 708                  | 628   | 708               | 627   |      |
| Barbados              | 2011-2013   | Health of the Nation (HotN)                                                                                                                        | National                    | both                 | 25+                                 | 25+   | 42                   | 24    |                   |       |      |
| Belize                | 2004-2005   | CAMDI                                                                                                                                              | National                    | both                 | 20+                                 | 20+   | 200                  | 95    |                   |       |      |
| Belize                | 2011        | Global School-based Student Health Survey                                                                                                          | National                    | both                 | 13                                  | 13    | 188                  | 163   | 188               | 163   |      |
| Belize                | 2017        | Survey of Risk Factors for Chronic Kidney Disease (SRFCKD)                                                                                         | National                    | both                 | 20-55                               | 20-55 | 1436                 | 910   |                   |       |      |
| Cuba                  | 1995        | National Survey on Risk Factors and Chronic Diseases (NSRFCD)                                                                                      | National                    | urban                | 15+                                 | 15+   | 561                  | 488   | 561               | 488   |      |
| Cuba                  | 2001        | National Survey on Risk Factors and Chronic Diseases (NSRFCD)                                                                                      | National                    | urban                | 15+                                 | 15+   | 2933                 | 2777  | 881               | 903   |      |
| Cuba                  | 2010        | National Survey on Risk Factors and Chronic Diseases (NSRFCD)                                                                                      | National                    | both                 | 15+                                 | 15+   | 782                  | 786   | 255               | 244   |      |
| Cuba                  | 2011        | Non communicable disease risk factor in Cienfuegos                                                                                                 | Community                   | urban                | 15-80                               | 15-80 | 176                  | 129   | 56                | 41    |      |
| Dominica              | 2007        | STEPS                                                                                                                                              | National                    | both                 | 15-64                               | 15-64 | 161                  | 131   | 76                | 67    |      |
| Dominica              | 2009        | Global School-based Student Health Survey                                                                                                          | National                    | both                 | 13-17                               | 13-17 | 542                  | 509   | 542               | 508   |      |
| Dominican Republic    | 1996        | DHS                                                                                                                                                | National                    | both                 | 15-49                               |       | 4494                 |       | 1613              |       |      |
| Dominican Republic    | 1996-1998   | Estudio factores de riesgo cardiovascular y sindrome metabolico en la Republica Dominicana I (EFRICARD I)                                          | National                    | both                 | 18-75                               | 18-75 | 594                  | 228   | 49                | 18    |      |
| Dominican Republic    | 2010-2012   | Estudio factores de riesgo cardiovascular y sindrome metabolico en la Republica Dominicana II (EFRICARD II)                                        | National                    | both                 | 18-75                               | 18-75 | 703                  | 286   | 162               | 63    |      |
| Dominican Republic    | 2013        | DHS                                                                                                                                                | National                    | both                 | 15-49                               | 15-59 | 4967                 | 4872  | 1767              | 1896  |      |
| Dominican Republic    | 2017        | Prevalencia de hta y factores de riesgo en La Republica Dominicana al 2017 (ENPREFAR HAS 17)                                                       | National                    | both                 | 18+                                 | 18+   | 327                  | 335   | 46                | 72    |      |
| Grenada               | 2011        | STEPS                                                                                                                                              | National                    | both                 | 25-64                               | 25-64 | 103                  | 77    |                   |       |      |
| Guyana                | 2009        | DHS                                                                                                                                                | National                    | both                 | 15-49                               | 15-49 | 2392                 | 1641  | 913               | 702   |      |
| Guyana                | 2010        | Global School-based Student Health Survey                                                                                                          | National                    | both                 | 13-17                               | 13-17 | 1261                 | 988   | 1261              | 987   |      |
| Guyana                | 2016        | Interaction between sex and rurality on the prevalence of diabetes in Guyana: a nationally representative study                                    | National                    | both                 | 18-69                               | 18-69 | 137                  | 69    | 21                | 16    |      |
| Guyana                | 2016        | STEPS                                                                                                                                              | National                    | both                 | 18-69                               | 18-69 | 448                  | 273   | 72                | 54    |      |
| Haiti                 | 2000        | DHS                                                                                                                                                | National                    | both                 | 15-49                               |       | 5696                 |       | 2277              |       |      |
| Haiti                 | 2005-2006   | DHS                                                                                                                                                | National                    | both                 | 15-49                               |       | 3227                 |       | 1320              |       |      |
| Haiti                 | 2012        | DHS                                                                                                                                                | National                    | both                 | 15-49                               |       | 5761                 |       | 2266              |       |      |
| Haiti                 | 2015-2016   | Haiti Health Study (Carrefour)                                                                                                                     | Community                   | urban                | 25-65                               | 25-65 | 196                  | 149   |                   |       |      |
| Haiti                 | 2015-2016   | Haiti Health Study (Thomonde)                                                                                                                      | Community                   | rural                | 25-65                               | 25-65 | 67                   | 45    |                   |       |      |
| Haiti                 | 2016-2017   | DHS                                                                                                                                                | National                    | both                 | 15-49                               |       | 5526                 |       | 2169              |       |      |
| Jamaica               | 2000-2001   | Jamaica Health and Lifestyle Survey                                                                                                                | National                    | both                 | 15-74                               | 15-74 | 406                  | 203   | 93                | 72    |      |
| Jamaica               | 2005        | Jamaican Youth Risk and Resiliency Behaviour Survey 2005                                                                                           | National                    | both                 | 10-15                               | 10-15 | 1519                 | 1379  | 1386              | 1328  |      |
| Jamaica               | 2006-2007   | Jamaica Youth Risk and Resiliency Behaviour Survey 2006                                                                                            | National                    | both                 | 15-19                               | 15-19 | 701                  | 585   | 701               | 585   |      |
| Jamaica               | 2007-2008   | Jamaica Health and Lifestyle Survey                                                                                                                | National                    | both                 | 15-74                               | 15-74 | 525                  | 261   | 148               | 86    |      |
| Jamaica               | 2010        | Global School-based Student Health Survey                                                                                                          | National                    | both                 | 13-17                               |       | 788                  |       | 787               |       |      |
| Jamaica               | 2016-2017   | Jamaica Health and Lifestyle Survey                                                                                                                | National                    | both                 | 15+                                 | 15+   | 348                  | 241   | 95                | 69    |      |
| Puerto Rico           | 2010-2013   | HPV Infection in a Population-Based Sample of Puerto Rican Women                                                                                   | Subnational                 | both                 | 16-64                               |       | 118                  |       | 22                |       |      |
| Saint Kitts and Nevis | 2007        | STEPS                                                                                                                                              | Subnational                 | both                 | 25-64                               | 25-64 | 130                  | 63    |                   |       |      |
| Saint Kitts and Nevis | 2011        | Global School-based Student Health Survey                                                                                                          | National                    | both                 | 13-17                               | 13-17 | 814                  | 651   | 814               | 650   |      |

| Country                          | Study years | Survey/study name/citation                                                                                                        | Level of representativeness | Rural, urban or both | Age range as in NCD-RisC database * |       | Sample size (height) |       | Sample size (BMI) |       | Note |
|----------------------------------|-------------|-----------------------------------------------------------------------------------------------------------------------------------|-----------------------------|----------------------|-------------------------------------|-------|----------------------|-------|-------------------|-------|------|
|                                  |             |                                                                                                                                   |                             |                      | Female                              | Male  | Female               | Male  | Female            | Male  |      |
| Saint Lucia                      | 2012        | STEPS                                                                                                                             | National                    | both                 | 25-64                               | 25-64 | 127                  | 82    |                   |       |      |
| Saint Vincent and the Grenadines | 2013-2014   | STEPS                                                                                                                             | National                    | both                 | 18-69                               | 18-69 | 462                  | 295   | 68                | 57    |      |
| Saint Vincent and the Grenadines | 2018        | Global School-based Student Health Survey                                                                                         | National                    | both                 | 13-17                               | 13-17 | 841                  | 738   | 839               | 737   |      |
| Suriname                         | 2013-2015   | The Healthy Life in Suriname Study (HELISUR)                                                                                      | Subnational                 | urban                | 18-70                               | 18-70 | 151                  | 93    | 6                 | 5     |      |
| Trinidad and Tobago              | 1999        | Child Health Survey                                                                                                               | National                    | both                 | 5-9                                 | 5-9   | 3273                 | 3064  | 3272              | 3060  |      |
| Trinidad and Tobago              | 2001        | Adult Survey                                                                                                                      | National                    | rural                | 25+                                 | 25+   | 40                   | 18    |                   |       |      |
| Trinidad and Tobago              | 2003        | Child Health Survey                                                                                                               | National                    | both                 | 5-9                                 | 5-9   | 1978                 | 1833  | 1974              | 1832  |      |
| Trinidad and Tobago              | 2003        | National Survey of Senior School Health                                                                                           | National                    | both                 | 15-16                               | 15-16 | 1113                 | 830   | 1112              | 828   |      |
| Trinidad and Tobago              | 2011        | STEPS                                                                                                                             | National                    | both                 | 15-64                               | 15-64 | 444                  | 356   | 121               | 112   |      |
| <i>Central Latin America</i>     |             |                                                                                                                                   |                             |                      |                                     |       |                      |       |                   |       |      |
| Colombia                         | 2000        | DHS                                                                                                                               | National                    | both                 | 20-49                               |       | 1944                 |       |                   |       |      |
| Colombia                         | 2002        | The Santa Fe Study (Santa Fe)                                                                                                     | Community                   | urban                | 15-69                               | 15-69 | 269                  | 168   | 86                | 60    |      |
| Colombia                         | 2002        | The Santa Fe Study (Tunjuelito)                                                                                                   | Community                   | urban                | 15-29                               | 15-29 | 312                  | 208   | 127               | 93    |      |
| Colombia                         | 2005        | DHS                                                                                                                               | National                    | both                 | 5-64                                | 5-64  | 33673                | 27551 | 21521             | 20154 |      |
| Colombia                         | 2005        | Encuesta Nacional de Situación Nutricional                                                                                        | National                    | both                 | 5-49                                | 5-12  | 5005                 | 2646  | 3534              | 2644  |      |
| Colombia                         | 2004-2005   | CARDIOVASCULAR Risk factors Multiple Evaluation in Latin America (CARMELA)                                                        | Community                   | urban                | 25-64                               | 25-64 | 182                  | 169   |                   |       |      |
| Colombia                         | 2007        | Encuesta Nacional de Salud                                                                                                        | National                    | both                 | 18-69                               | 18-69 | 2489                 | 1860  | 394               | 350   |      |
| Colombia                         | 2010        | DHS                                                                                                                               | National                    | both                 | 5-64                                | 5-64  | 43675                | 39428 | 28434             | 28359 |      |
| Colombia                         | 2010        | STEPS                                                                                                                             | Subnational                 | both                 | 15-64                               | 15-64 | 527                  | 403   | 195               | 167   |      |
| Colombia                         | 2011-2013   | International Study of Childhood Obesity, Lifestyle and the Environment (ISCOLE)                                                  | Community                   | urban                | 9-11                                | 9-11  | 462                  | 454   | 462               | 454   |      |
| Colombia                         | 2014-2015   | Latin American Study of Nutrition and Health (ELANS)                                                                              | National                    | urban                | 15-65                               | 15-65 | 152                  | 178   | 55                | 66    |      |
| Colombia                         | 2015        | Encuesta Nacional de Situación Nutricional                                                                                        | National                    | both                 | 5-64                                | 5-64  | 2957                 | 2769  | 1798              | 1848  |      |
| Colombia                         | 2015        | STEPS                                                                                                                             | Subnational                 | both                 | 15-64                               | 15-64 | 324                  | 394   | 75                | 173   |      |
| Colombia                         | 2018        | COPEN: Estudio Colombiano de Perfiles Nutricionales                                                                               | Subnational                 | urban                | 5-75                                | 5-75  | 324                  | 424   | 161               | 248   |      |
| Costa Rica                       | 2004        | CAMDI                                                                                                                             | Community                   | urban                | 20+                                 | 20+   | 162                  | 75    |                   |       |      |
| Costa Rica                       | 2009        | Global School-based Student Health Survey                                                                                         | National                    | both                 | 13-17                               | 13    | 1308                 | 356   | 1308              | 356   |      |
| Costa Rica                       | 2010        | Costa Rican National Cardiovascular Risk Factors Survey, 2010                                                                     | National                    | both                 | 20+                                 | 20+   | 323                  | 136   |                   |       |      |
| Costa Rica                       | 2014        | Costa Rican National Cardiovascular Risk Factors Survey, 2014                                                                     | National                    | both                 | 20+                                 | 20+   | 391                  | 159   |                   |       |      |
| Costa Rica                       | 2014-2015   | Latin American Study of Nutrition and Health (ELANS)                                                                              | National                    | urban                | 15-65                               | 15-65 | 150                  | 194   | 56                | 72    |      |
| El Salvador                      | 2002-2003   | Encuesta Nacional de Salud Familiar                                                                                               | National                    | both                 | 15-49                               |       | 2677                 |       | 381               |       |      |
| El Salvador                      | 2004        | CAMDI                                                                                                                             | Community                   | urban                | 20+                                 | 20+   | 173                  | 107   |                   |       |      |
| El Salvador                      | 2008        | Encuesta Nacional de Salud Familiar                                                                                               | National                    | both                 | 15-49                               |       | 3798                 |       | 942               |       |      |
| El Salvador                      | 2013        | Global School-based Student Health Survey                                                                                         | National                    | both                 | 13-15                               |       | 675                  |       | 675               |       |      |
| El Salvador                      | 2014-2015   | Encuesta Nacional de Enfermedades Crónicas (ENECA-ELS)                                                                            | National                    | both                 | 20+                                 | 20+   | 749                  | 399   |                   |       |      |
| Guatemala                        | 1998-1999   | DHS                                                                                                                               | National                    | both                 | 20-49                               |       | 1368                 |       |                   |       |      |
| Guatemala                        | 2002        | Reproductive Health Survey                                                                                                        | National                    | both                 | 15-49                               | 15-59 | 4466                 | 1012  | 1305              | 387   |      |
| Guatemala                        | 2001-2002   | CAMDI                                                                                                                             | Community                   | urban                | 20+                                 | 20+   | 176                  | 76    |                   |       |      |
| Guatemala                        | 2003-2005   | The Institute of Nutrition of Central America and Panama Nutrition Supplementation Trial Cohort                                   | Community                   | both                 | 25-41                               | 25-41 | 88                   | 83    |                   |       |      |
| Guatemala                        | 2008-2009   | Encuesta Nacional de Salud Materno Infantil                                                                                       | National                    | both                 | 15-49                               | 15-59 | 8722                 | 3032  | 2632              | 1244  |      |
| Guatemala                        | 2013        | Sistema de vigilancia Epidemiológica de Salud y Nutrición (SIVESNU)                                                               | National                    | both                 | 15-49                               |       | 923                  |       | 277               |       |      |
| Guatemala                        | 2014-2015   | DHS                                                                                                                               | National                    | both                 | 15-49                               |       | 13387                |       | 5398              |       |      |
| Guatemala                        | 2015        | Sistema de vigilancia Epidemiológica de Salud y Nutrición (SIVESNU)                                                               | National                    | both                 | 15-49                               |       | 781                  |       | 239               |       |      |
| Guatemala                        | 2015        | STEPS                                                                                                                             | Subnational                 | urban                | 18+                                 | 18+   | 277                  | 111   | 42                | 26    |      |
| Guatemala                        | 2016        | Sistema de vigilancia Epidemiológica de Salud y Nutrición (SIVESNU)                                                               | National                    | both                 | 15-49                               |       | 809                  |       | 270               |       |      |
| Guatemala                        | 2018        | Assessing the food environment inside and around rural public schools in three villages of El Progreso, Guatemala. A pilot study. | Community                   | rural                | 6-15                                | 6-15  | 192                  | 202   | 192               | 202   |      |
| Guatemala                        | 2017-2018   | Sistema de vigilancia Epidemiológica de Salud y Nutrición (SIVESNU)                                                               | National                    | both                 | 15-49                               |       | 763                  |       | 249               |       |      |
| Guatemala                        | 2018-2019   | Population-Based Survey of Chronic Kidney Disease in Guatemala                                                                    | Community                   | rural                | 18+                                 | 18+   | 188                  | 93    | 26                | 15    |      |
| Guatemala                        | 2019        | Evaluación del estado nutricional de escolares de nivel preprimario y primario en el marco de la ley de alimentación escolar      | National                    | both                 | 5-14                                | 5-14  | 8981                 | 9649  | 8979              | 9645  |      |
| Guatemala                        | 2018-2019   | Sistema de vigilancia Epidemiológica de Salud y Nutrición (SIVESNU)                                                               | National                    | both                 | 15-49                               |       | 777                  |       | 243               |       |      |
| Honduras                         | 1996        | Honduras National Micronutrient Survey                                                                                            | National                    | both                 | 20-40                               |       | 240                  |       |                   |       |      |
| Honduras                         | 2003-2004   | CAMDI                                                                                                                             | Community                   | urban                | 20+                                 | 20+   | 216                  | 117   |                   |       |      |
| Honduras                         | 2005-2006   | DHS                                                                                                                               | National                    | both                 | 15-49                               |       | 11181                |       | 4132              |       |      |
| Honduras                         | 2011-2012   | DHS                                                                                                                               | National                    | both                 | 15-49                               |       | 12697                |       | 4802              |       |      |
| Mexico                           | 1988-1989   | Encuesta Nacional de Nutrición                                                                                                    | National                    | both                 | 12-49                               |       | 5396                 |       | 5828              |       | 1    |
| Mexico                           | 1988-1999   | Encuesta Nacional de Nutrición                                                                                                    | National                    | both                 | 12-49                               |       | 10194                |       | 5096              |       |      |
| Mexico                           | 1999        | National Survey on School Children                                                                                                | National                    | both                 | 5-10                                | 5-10  | 5040                 | 4910  | 5031              | 4898  |      |
| Mexico                           | 2000        | Encuesta Nacional de Salud                                                                                                        | National                    | both                 | 10+                                 | 10+   | 19512                | 12635 | 10897             | 9122  |      |
| Mexico                           | 2002        | Encuesta Nacional Sobre Niveles de vida de los Hogares                                                                            | National                    | both                 | 5+                                  | 5+    | 7638                 | 6738  | 5052              | 4771  |      |
| Mexico                           | 2005        | Encuesta Nacional Sobre Niveles de vida de los Hogares                                                                            | National                    | both                 | 5+                                  | 5+    | 7016                 | 6480  | 4664              | 4634  |      |
| Mexico                           | 2004-2005   | CARDIOVASCULAR Risk factors Multiple Evaluation in Latin America (CARMELA)                                                        | Community                   | urban                | 25-64                               | 25-64 | 213                  | 207   |                   |       |      |
| Mexico                           | 2006        | Encuesta Nacional de Salud y Nutrición                                                                                            | National                    | both                 | 5+                                  | 5+    | 19604                | 17464 | 15038             | 14622 |      |
| Mexico                           | 2006        | PREVENIMSS National Coverage Surveys                                                                                              | National                    | urban                | 20+                                 | 20+   | 2265                 | 1944  |                   |       |      |
| Mexico                           | 2010        | PREVENIMSS National Coverage Surveys                                                                                              | National                    | urban                | 20+                                 | 20+   | 990                  | 1381  |                   |       |      |
| Mexico                           | 2009-2012   | Encuesta Nacional Sobre Niveles de vida de los Hogares                                                                            | National                    | both                 | 5+                                  | 5+    | 2371                 | 2046  | 864               | 763   |      |
| Mexico                           | 2011-2012   | Encuesta Nacional de Salud y Nutrición                                                                                            | National                    | both                 | 5+                                  | 5+    | 19978                | 18678 | 15145             | 15319 |      |
| Mexico                           | 2016        | Encuesta Nacional de Salud y Nutrición                                                                                            | National                    | both                 | 5+                                  | 5+    | 4108                 | 3331  | 2976              | 2815  |      |

| Country                       | Study years | Survey/study name/citation                                                                                                             | Level of representativeness | Rural, urban or both | Age range as in NCD-RisC database * |           | Sample size (height) |       | Sample size (BMI) |       | Note |
|-------------------------------|-------------|----------------------------------------------------------------------------------------------------------------------------------------|-----------------------------|----------------------|-------------------------------------|-----------|----------------------|-------|-------------------|-------|------|
|                               |             |                                                                                                                                        |                             |                      | Female                              | Male      | Female               | Male  | Female            | Male  |      |
| Mexico                        | 2018-2019   | Encuesta Nacional de Salud y Nutrición                                                                                                 | National                    | both                 | 5+                                  | 5+        | 7941                 | 7422  | 5983              | 5989  |      |
| Nicaragua                     | 1997-1998   | DHS                                                                                                                                    | National                    | both                 | 15-49                               |           | 7617                 |       | 2966              |       |      |
| Nicaragua                     | 2001        | DHS                                                                                                                                    | National                    | both                 | 15-49                               |           | 7292                 |       | 2838              |       |      |
| Nicaragua                     | 2003-2004   | CAMDI                                                                                                                                  | Community                   | urban                | 20+                                 | 20+       | 204                  | 235   |                   |       |      |
| Nicaragua                     | 2006-2007   | Encuesta Nicaraguense de Demografía y Salud                                                                                            | National                    | both                 | 15-49                               |           | 7317                 |       | 2383              |       |      |
| Nicaragua                     | 2011-2012   | Encuesta Nicaraguense de Demografía y Salud                                                                                            | National                    | both                 | 15-49                               |           | 7451                 |       | 2562              |       |      |
| Panama                        | 2003        | Encuesta de Niveles de Vida                                                                                                            | National                    | both                 | 5+                                  | 5+        | 5942                 | 5983  | 3980              | 4154  |      |
| Panama                        | 2010-2011   | Prevalencia de factores de riesgo asociados a enfermedad cardiovascular 2010-2011                                                      | Subnational                 | both                 | 18+                                 | 18+       | 549                  | 183   | 98                | 29    |      |
| Panama                        | 2018        | Global School-based Student Health Survey                                                                                              | National                    | both                 | 13-17                               | 13-17     | 1385                 | 1121  | 1384              | 1121  |      |
| Panama                        | 2019        | Encuesta Nacional de Salud de Panama (ENSPA)                                                                                           | National                    | both                 | 15+                                 | 15+       | 3372                 | 1027  | 714               | 413   |      |
| Venezuela                     | 2004-2005   | CARDIOVASCULAR Risk factors Multiple Evaluation in Latin America (CARMELA)                                                             | Community                   | urban                | 25-64                               | 25-64     | 224                  | 178   |                   |       |      |
| Venezuela                     | 2005-2006   | Brajkovich et al., Rev Ven Endoc Metab 4(3):31-32, 2006                                                                                | Community                   | urban                | 20-65                               | 20-65     | 73                   | 22    |                   |       |      |
| Venezuela                     | 2007-2008   | Venezuelan Study of Metabolic Syndrome, Obesity and Lifestyle (VEMSOLS)                                                                | Community                   | urban                | 20+                                 | 20+       | 27                   | 20    |                   |       |      |
| Venezuela                     | 2008-2009   | Venezuelan Study of Metabolic Syndrome, Obesity and Lifestyle (VEMSOLS)                                                                | Community                   | rural                | 20+                                 | 20+       | 29                   | 16    |                   |       |      |
| Venezuela                     | 2010-2011   | Cardiometabolic risk factors in schoolchildren and adolescents of Mérida, Venezuela (CREDEFAR)                                         | Community                   | urban                | 9-18                                | 9-18      | 475                  | 443   | 475               | 443   |      |
| Venezuela                     | 2010-2011   | Venezuelan Study of Metabolic Syndrome, Obesity and Lifestyle (VEMSOLS)                                                                | Community                   | urban                | 20+                                 | 20+       | 35                   | 15    |                   |       |      |
| Venezuela                     | 2014-2015   | Latin American Study of Nutrition and Health (ELANS)                                                                                   | National                    | urban                | 15-65                               | 15-65     | 239                  | 241   | 74                | 82    |      |
| Venezuela                     | 2015-2017   | Cardio-Metabolic Health Venezuelan Study (EVESCAM)                                                                                     | National                    | both                 | 20+                                 | 20+       | 302                  | 126   |                   |       |      |
| Venezuela                     | 2018-2020   | Cardio-metabolic Health Venezuelan Study (EVESCAM) follow-up                                                                           | National                    | both                 | 22+                                 | 22+       | 45                   | 21    |                   |       |      |
| <i>Southern Latin America</i> |             |                                                                                                                                        |                             |                      |                                     |           |                      |       |                   |       |      |
| Argentina                     | 2005        | Encuesta Nacional de Nutrición y Salud 2005                                                                                            | National                    | both                 | 10-49                               |           | 3939                 |       | 2171              |       |      |
| Argentina                     | 2004-2005   | CARDIOVASCULAR Risk factors Multiple Evaluation in Latin America (CARMELA)                                                             | Community                   | urban                | 25-64                               | 25-64     | 184                  | 195   |                   |       |      |
| Argentina                     | 2008-2011   | The VELA Project                                                                                                                       | Community                   | rural                | 5+                                  | 5+        | 361                  | 281   | 291               | 246   |      |
| Argentina                     | 2011        | Primera Encuesta Alimentaria y Nutricional de la Ciudad Autónoma de Buenos Aires - EAN CABA                                            | Community                   | urban                | 5-49; 60+                           | 5-18; 60+ | 1332                 | 982   | 1012              | 982   |      |
| Argentina                     | 2012        | Global School-based Student Health Survey                                                                                              | National                    | both                 | 13-17                               | 13-17     | 8906                 | 8337  | 8904              | 8333  |      |
| Argentina                     | 2012-2013   | Primer estudio sobre el estado nutricional y los hábitos alimentarios de la población adulta de Rosario                                | Community                   | urban                | 18-70                               | 18-70     | 312                  | 129   | 54                | 17    |      |
| Argentina                     | 2014-2015   | Latin American Study of Nutrition and Health (ELANS)                                                                                   | National                    | urban                | 15-65                               | 15-65     | 223                  | 232   | 61                | 91    |      |
| Argentina                     | 2018        | Encuesta Nacional de Factores de Riesgo 2018                                                                                           | National                    | both                 | 18+                                 | 18+       | 1931                 | 1605  | 250               | 291   |      |
| Argentina                     | 2018        | Global School-based Student Health Survey                                                                                              | National                    | both                 | 12-17                               | 12-17     | 18979                | 16801 | 18935             | 16773 |      |
| Brazil                        | 1989        | Pesquisa Nacional sobre Saude e Nutricao                                                                                               | National                    | both                 | 5+                                  | 5+        | 10258                | 10503 | 10832             | 11049 | 1    |
| Brazil                        | 1995        | The 1982 Pelotas (Brazil) Birth Cohort: 13 years follow-up                                                                             | Community                   | urban                | 13                                  | 13        | 363                  | 352   | 363               | 352   |      |
| Brazil                        | 1995-1996   | Cohort study from Porto Alegre                                                                                                         | Community                   | urban                | 18+                                 | 18+       | 148                  | 151   | 26                | 22    |      |
| Brazil                        | 1996-1997   | Pesquisa sobre Padrões de Vida (PPV)                                                                                                   | Subnational                 | both                 | 5+                                  | 5+        | 4405                 | 4207  | 2843              | 2901  |      |
| Brazil                        | 1996        | DHS                                                                                                                                    | National                    | both                 | 20-49                               |           | 1817                 |       |                   |       |      |
| Brazil                        | 1996-1997   | The Bambui Cohort Study of Ageing                                                                                                      | Community                   | urban                | 18+                                 | 18+       | 131                  | 129   | 20                | 25    |      |
| Brazil                        | 1997        | The 1982 Pelotas (Brazil) Birth Cohort: 15 years follow-up                                                                             | Community                   | urban                | 15                                  | 15        | 513                  | 559   | 513               | 559   |      |
| Brazil                        | 1998        | Belo Horizonte Heart Study                                                                                                             | Community                   | urban                | 6-18                                | 6-18      | 738                  | 658   | 738               | 658   |      |
| Brazil                        | 2000        | The 1982 Pelotas (Brazil) Birth Cohort: 18 years follow-up                                                                             | Community                   | urban                | 18                                  |           | 2229                 |       | 2228              |       |      |
| Brazil                        | 1999-2000   | Projeto Esporte Brasil                                                                                                                 | National                    | urban                | 6-11                                | 6-11      | 102                  | 107   | 102               | 107   |      |
| Brazil                        | 1999-2000   | Pelotas cross-sectional survey                                                                                                         | Community                   | urban                | 20-69                               | 20-69     | 220                  | 229   |                   |       |      |
| Brazil                        | 1999-2000   | Prevalence of Risk Factors for Coronary Artery Disease in the State of Rio Grande do Sul                                               | Subnational                 | urban                | 20+                                 | 20+       | 118                  | 125   |                   |       |      |
| Brazil                        | 2001        | The 1982 Pelotas (Brazil) Birth Cohort: 19 years follow-up                                                                             | Community                   | urban                | 19                                  |           | 920                  |       | 919               |       |      |
| Brazil                        | 2001        | Projeto Esporte Brasil                                                                                                                 | National                    | urban                | 6-17                                | 6-17      | 224                  | 251   | 224               | 249   |      |
| Brazil                        | 2002        | Study of the prevalence of obesity in children and adolescents (Estudo da prevalência da obesidade em crianças e adolescentes (EPOCA)) | Community                   | urban                | 7-10                                | 7-10      | 1430                 | 1504  | 1430              | 1504  |      |
| Brazil                        | 2002-2003   | Pesquisa de Orcamentos Familiares                                                                                                      | National                    | both                 | 5+                                  | 5+        | 41332                | 44862 | 27119             | 29276 |      |
| Brazil                        | 2003        | Projeto Esporte Brasil                                                                                                                 | National                    | both                 | 6-17                                | 6-17      | 2078                 | 2022  | 2073              | 2015  |      |
| Brazil                        | 2003        | Women health in Southern Brazil                                                                                                        | Community                   | urban                | 20-60                               |           | 262                  |       |                   |       |      |
| Brazil                        | 2004        | Caju & Virgen das Gracias                                                                                                              | Community                   | rural                | 18+                                 | 18+       | 77                   | 73    | 14                | 15    |      |
| Brazil                        | 2004        | Projeto Esporte Brasil                                                                                                                 | National                    | both                 | 6-17                                | 6-17      | 12304                | 14509 | 12254             | 14447 |      |
| Brazil                        | 2002-2004   | 1978-1979 Ribeira Preto Birth Cohort                                                                                                   | Community                   | urban                | 22-25                               | 22-25     | 1083                 | 1013  |                   |       |      |
| Brazil                        | 2005        | Prevalência e Fatores de Risco Cardiovascular em Crianças                                                                              | Community                   | urban                | 7-12                                | 7-12      | 720                  | 777   | 719               | 776   |      |
| Brazil                        | 2004-2006   | Hearts of Brazil                                                                                                                       | National                    | urban                | 18+                                 | 18+       | 129                  | 113   | 20                | 11    |      |
| Brazil                        | 2004-2005   | The 1993 Pelotas (Brazil) Birth Cohort: 11 years follow-up                                                                             | Community                   | urban                | 10-12                               | 10-12     | 2258                 | 2184  | 2257              | 2184  |      |
| Brazil                        | 2005        | Projeto Esporte Brasil                                                                                                                 | National                    | both                 | 6-17                                | 6-17      | 3387                 | 3743  | 3286              | 3615  |      |
| Brazil                        | 2004-2005   | 1994 Ribeira Preto Birth Cohort                                                                                                        | Community                   | urban                | 10-11                               | 10-11     | 388                  | 400   | 388               | 400   |      |
| Brazil                        | 2004-2005   | Schoolchildren's Health                                                                                                                | Community                   | both                 | 6-17                                | 6-17      | 1245                 | 1240  | 1245              | 1240  |      |
| Brazil                        | 2005        | Syndrome of Obesity and Risk Factors for Cardiovascular Disease Study                                                                  | Community                   | urban                | 18-90                               | 18-90     | 211                  | 209   | 69                | 74    |      |
| Brazil                        | 2004-2005   | The 1982 Pelotas (Brazil) Birth Cohort: 23 years follow-up                                                                             | Community                   | urban                | 23                                  | 23        | 2082                 | 2207  |                   |       |      |
| Brazil                        | 2006        | ATITUDE                                                                                                                                | Subnational                 | both                 | 14-21                               | 14-21     | 3454                 | 2392  | 2459              | 1660  |      |
| Brazil                        | 2006        | The Ouro Preto Study                                                                                                                   | Community                   | urban                | 7-14                                | 7-14      | 399                  | 364   | 399               | 364   |      |
| Brazil                        | 2006        | Pesquisa Nacional de Demografia e Saude 2006                                                                                           | National                    | both                 | 15-49                               |           | 6916                 |       | 2329              |       |      |
| Brazil                        | 2006        | Projeto Esporte Brasil                                                                                                                 | National                    | both                 | 6-17                                | 6-17      | 6220                 | 7521  | 6211              | 7505  |      |
| Brazil                        | 2005-2006   | Sao Luis Birth Cohort                                                                                                                  | Community                   | urban                | 7-8                                 | 7-8       | 325                  | 347   | 325               | 347   |      |
| Brazil                        | 2007        | Cardiovascular Disease Risk Factors in Caxias do Sul-RS, Brazil Adolescents                                                            | Community                   | urban                | 11-17                               | 11-17     | 886                  | 776   | 886               | 774   |      |
| Brazil                        | 2007        | Study of the prevalence of obesity in children and adolescents (Estudo da prevalência da obesidade em crianças e adolescentes (EPOCA)) | Community                   | urban                | 7-10                                | 7-10      | 624                  | 603   | 624               | 603   |      |

| Country | Study years | Survey/study name/citation                                                                                                             | Level of representativeness | Rural, urban or both | Age range as in NCD-RisC database * |       | Sample size (height) |       | Sample size (BMI) |       | Note |
|---------|-------------|----------------------------------------------------------------------------------------------------------------------------------------|-----------------------------|----------------------|-------------------------------------|-------|----------------------|-------|-------------------|-------|------|
|         |             |                                                                                                                                        |                             |                      | Female                              | Male  | Female               | Male  | Female            | Male  |      |
| Brazil  | 2007        | Prevalence of overweight and obesity in children from Medianeira, Paraná, Brazil                                                       | Community                   | urban                | 5-12                                | 5-12  | 515                  | 529   | 515               | 529   |      |
| Brazil  | 2007        | Projeto Esporte Brasil                                                                                                                 | National                    | both                 | 6-17                                | 6-17  | 4218                 | 4771  | 4214              | 4767  |      |
| Brazil  | 2006-2007   | Syndrome of Obesity and Risk Factors for Cardiovascular Disease Study among Teenagers                                                  | Community                   | urban                | 11-18                               | 11-18 | 238                  | 231   | 236               | 230   |      |
| Brazil  | 2008        | Caju & Virgen das Gracias                                                                                                              | Community                   | rural                | 18+                                 | 18+   | 76                   | 62    | 24                | 14    |      |
| Brazil  | 2007-2008   | Christofaro et al., Scand J Med Sci Sports 23(3):317-22, 2013                                                                          | Community                   | urban                | 10-16                               | 10-16 | 528                  | 493   | 528               | 493   |      |
| Brazil  | 2007-2008   | Nutritional status of children in daycare center                                                                                       | Community                   | urban                | 5-7                                 | 5-7   | 81                   | 83    | 81                | 83    |      |
| Brazil  | 2008        | The 1993 Pelotas (Brazil) Birth Cohort: 15 years follow-up                                                                             | Community                   | urban                | 14-15                               | 14-15 | 2095                 | 2001  | 2095              | 2001  |      |
| Brazil  | 2008        | Projeto Esporte Brasil                                                                                                                 | National                    | both                 | 6-17                                | 6-17  | 2395                 | 3511  | 2384              | 3474  |      |
| Brazil  | 2007-2009   | Schoolchildren's Health                                                                                                                | Community                   | both                 | 6-17                                | 6-17  | 742                  | 837   | 742               | 837   |      |
| Brazil  | 2008-2010   | Machado-Rodrigues et al., Ann Hum Biol 41(3): 271-6, 2013                                                                              | Community                   | urban                | 10-17                               | 10-17 | 507                  | 376   | 507               | 376   |      |
| Brazil  | 2008-2009   | Pesquisa de Orcamentos Familiares                                                                                                      | National                    | both                 | 5+                                  | 5+    | 42858                | 43488 | 25710             | 27098 |      |
| Brazil  | 2009        | Projeto Esporte Brasil                                                                                                                 | National                    | both                 | 6-17                                | 6-17  | 781                  | 969   | 765               | 942   |      |
| Brazil  | 2010        | Longitudinal Study of Health and Wellbeing in Preschool Age (Project ELOS-Pré)                                                         | Community                   | urban                | 5                                   | 5     | 247                  | 255   | 247               | 255   |      |
| Brazil  | 2010        | Projeto Esporte Brasil                                                                                                                 | National                    | both                 | 6-17                                | 6-17  | 1049                 | 1095  | 1045              | 1093  |      |
| Brazil  | 2010        | San Pedro                                                                                                                              | Community                   | rural                | 18+                                 | 18+   | 48                   | 37    | 10                | 8     |      |
| Brazil  | 2009-2010   | EpiFloripa Adults Cohort Study                                                                                                         | Community                   | urban                | 20-59                               | 20-59 | 266                  | 262   |                   |       |      |
| Brazil  | 2011        | ATITUDE                                                                                                                                | Subnational                 | both                 | 14-19                               | 14-19 | 3636                 | 2416  | 3636              | 2415  |      |
| Brazil  | 2010-2011   | The 2004 Pelotas (Brazil) Birth Cohort: 6 years follow-up                                                                              | Community                   | urban                | 6-7                                 | 6-7   | 1740                 | 1864  | 1631              | 1721  |      |
| Brazil  | 2011        | Pregnancy in adolescence in municipalities of small size in the Northeast of Brazil                                                    | Community                   | both                 | 13-19                               | 13-19 | 563                  | 512   | 563               | 512   |      |
| Brazil  | 2011        | Projeto Esporte Brasil                                                                                                                 | National                    | both                 | 6-17                                | 6-17  | 933                  | 1256  | 928               | 1239  |      |
| Brazil  | 2012        | Anthropometric indices in Brazilian children: Colombo, Parana, Brazil                                                                  | Community                   | both                 | 6-11                                | 6-11  | 1012                 | 1021  | 1012              | 1021  |      |
| Brazil  | 2012        | Longitudinal Study of Health and Wellbeing in Preschool Age (Project ELOS-Pré)                                                         | Community                   | urban                | 5-7                                 | 5-7   | 349                  | 388   | 348               | 388   |      |
| Brazil  | 2011-2013   | International Study of Childhood Obesity, Lifestyle and the Environment (ISCOLE)                                                       | Community                   | urban                | 9-11                                | 9-11  | 297                  | 287   | 287               | 277   |      |
| Brazil  | 2011-2012   | The 1993 Pelotas (Brazil) Birth Cohort: 18 years follow-up                                                                             | Community                   | urban                | 17-19                               | 17-19 | 2004                 | 1970  | 2004              | 1970  |      |
| Brazil  | 2012        | Projeto Esporte Brasil                                                                                                                 | National                    | both                 | 6-17                                | 6-17  | 1989                 | 3130  | 1973              | 3114  |      |
| Brazil  | 2011-2012   | Schoolchildren's Health                                                                                                                | Community                   | both                 | 6-17                                | 6-17  | 1052                 | 891   | 1052              | 891   |      |
| Brazil  | 2012        | EpiFloripa Adults Cohort Study                                                                                                         | Community                   | urban                | 22-62                               | 22-62 | 121                  | 103   |                   |       |      |
| Brazil  | 2010-2015   | Baependi Heart Study                                                                                                                   | Community                   | rural                | 18+                                 | 18+   | 293                  | 240   | 48                | 47    |      |
| Brazil  | 2012-2013   | Study of the prevalence of obesity in children and adolescents (Estudo da prevalência da obesidade em crianças e adolescentes (EPOCA)) | Community                   | urban                | 7-10                                | 7-10  | 799                  | 723   | 799               | 723   |      |
| Brazil  | 2012-2013   | Evaluation of the realization of the human right to adequate food among public and private elementary school students in Maceió        | Subnational                 | urban                | 9-11                                | 9-11  | 702                  | 640   | 701               | 639   |      |
| Brazil  | 2013        | Pesquisas Nacional de Saude                                                                                                            | National                    | both                 | 18+                                 | 18+   | 7421                 | 6060  | 1101              | 1005  |      |
| Brazil  | 2012-2013   | Prevalence of Leptin Polymorphism Gln223Arg                                                                                            | Community                   | urban                | 18+                                 | 18+   | 137                  | 71    | 24                | 15    |      |
| Brazil  | 2013        | Projeto Esporte Brasil                                                                                                                 | National                    | urban                | 6-17                                | 6-17  | 965                  | 1270  | 960               | 1269  |      |
| Brazil  | 2012-2013   | The 1982 Pelotas (Brazil) Birth Cohort: 30 years follow-up                                                                             | Community                   | urban                | 30                                  | 30    | 1853                 | 1754  |                   |       |      |
| Brazil  | 2011-2014   | Profile of Risk Factors for Coronary Arterial Disease in Rio Grande do Sul - Reevaluation After 10 Years                               | Subnational                 | urban                | 20+                                 | 20+   | 63                   | 60    |                   |       |      |
| Brazil  | 2014        | Brazilian Guide to the Physical Fitness related to Health Assessment and Lifestyle Habits                                              | Community                   | urban                | 14-19                               | 14-19 | 538                  | 473   | 535               | 473   |      |
| Brazil  | 2014        | Longitudinal Study of Health and Wellbeing in Preschool Age (Project ELOS-Pré)                                                         | Community                   | urban                | 7-9                                 | 7-9   | 213                  | 246   | 200               | 223   |      |
| Brazil  | 2013-2014   | Estudo de Riscos Cardiovasculares em Adolescentes (ERICA)                                                                              | National                    | both                 | 12-17                               | 12-17 | 40675                | 32724 | 40675             | 32723 |      |
| Brazil  | 2014        | Projeto Esporte Brasil                                                                                                                 | National                    | both                 | 6-17                                | 6-17  | 210                  | 265   | 210               | 265   |      |
| Brazil  | 2014-2015   | Latin American Study of Nutrition and Health (ELANS)                                                                                   | National                    | urban                | 15-65                               | 15-65 | 323                  | 388   | 95                | 140   |      |
| Brazil  | 2015-2016   | The Ouro Preto Study                                                                                                                   | Community                   | rural                | 18+                                 | 18+   | 46                   | 27    | 7                 | 10    |      |
| Brazil  | 2015        | The 2004 Pelotas (Brazil) Birth Cohort: 11 years follow-up                                                                             | Community                   | urban                | 10-11                               | 10-11 | 1632                 | 1736  | 1632              | 1736  |      |
| Brazil  | 2015        | Projeto Esporte Brasil                                                                                                                 | National                    | urban                | 6-17                                | 6-17  | 497                  | 639   | 496               | 639   |      |
| Brazil  | 2014-2015   | Schoolchildren's Health                                                                                                                | Community                   | both                 | 6-17                                | 6-17  | 1398                 | 1098  | 1397              | 1098  |      |
| Brazil  | 2014-2015   | II Diagnóstico de Saúde da População Materno-Infantil do Estado de Alagoas                                                             | Subnational                 | both                 | 19-49                               |       | 947                  |       |                   |       |      |
| Brazil  | 2014-2015   | EpiFloripa Adults Cohort Study                                                                                                         | Community                   | urban                | 25-65                               | 25-65 | 55                   | 41    |                   |       |      |
| Brazil  | 2016        | ATITUDE                                                                                                                                | Subnational                 | both                 | 14-21                               | 14-21 | 3206                 | 2570  | 3182              | 2553  |      |
| Brazil  | 2016        | Projeto Esporte Brasil                                                                                                                 | National                    | urban                | 6-17                                | 6-17  | 110                  | 175   | 110               | 175   |      |
| Brazil  | 2015-2016   | The 1993 Pelotas (Brazil) Birth Cohort: 22 years follow-up                                                                             | Community                   | urban                | 21-23                               | 21-23 | 1886                 | 1703  |                   |       |      |
| Brazil  | 2017        | Projeto Esporte Brasil                                                                                                                 | National                    | both                 | 6-17                                | 6-17  | 1357                 | 2735  | 1349              | 2733  |      |
| Brazil  | 2017        | Intervention in physical education classes to reduce sedentary behavior and improve cognitive function: SACODE                         | Community                   | both                 | 14-19                               | 14-19 | 624                  | 498   | 623               | 498   |      |
| Brazil  | 2016-2017   | Schoolchildren's Health                                                                                                                | Community                   | both                 | 6-17                                | 6-17  | 1424                 | 1073  | 1424              | 1073  |      |
| Brazil  | 2016-2017   | Study in Presidente Prudente                                                                                                           | Community                   | urban                | 18+                                 | 18+   | 50                   | 30    | 7                 | 7     |      |
| Brazil  | 2018        | Healthy Living study in Lagoa do Carro                                                                                                 | Community                   | both                 | 5-15                                | 5-15  | 657                  | 704   | 657               | 704   |      |
| Brazil  | 2018        | Projeto Esporte Brasil                                                                                                                 | National                    | both                 | 6-17                                | 6-17  | 1160                 | 1330  | 1151              | 1314  |      |
| Brazil  | 2018-2019   | Study of the prevalence of obesity in children and adolescents (Estudo da prevalência da obesidade em crianças e adolescentes (EPOCA)) | Community                   | urban                | 7-10                                | 7-10  | 518                  | 410   | 518               | 410   |      |
| Brazil  | 2019        | Pesquisas Nacional de Saude                                                                                                            | National                    | both                 | 15+                                 | 15+   | 554                  | 629   | 127               | 174   |      |
| Brazil  | 2019        | Projeto Esporte Brasil                                                                                                                 | National                    | both                 | 6-17                                | 6-17  | 1396                 | 1623  | 1355              | 1587  |      |
| Brazil  | 2018-2019   | BP-SAMPA Project                                                                                                                       | Community                   | urban                | 10-17                               | 10-17 | 1853                 | 1329  | 1853              | 1328  |      |
| Brazil  | 2018-2019   | Epidemiology in the health (Santo Anastácio Edition)                                                                                   | Community                   | urban                | 18+                                 | 18+   | 38                   | 34    | 8                 | 4     |      |
| Brazil  | 2020        | Projeto Esporte Brasil                                                                                                                 | National                    | urban                | 6-17                                | 6-17  | 153                  | 334   | 153               | 332   |      |
| Chile   | 1988        | Chilean Health Study                                                                                                                   | Subnational                 | urban                | 15+                                 | 15+   | 54                   | 57    |                   |       |      |
| Chile   | 1992-1993   | Miguel et al., Gastroenterology 115(4):937-46, 1998                                                                                    | Community                   | urban                | 18+                                 | 18+   | 14                   | 8     | 14                | 8     |      |
| Chile   | 2000        | Nervi et al., J Hepatol 45(2):299-305, 2006                                                                                            | Community                   | urban                | 18+                                 | 18+   | 15                   | 2     |                   |       |      |
| Chile   | 2003        | Encuesta Nacional de Salud                                                                                                             | National                    | both                 | 17+                                 | 17+   | 306                  | 306   | 76                | 63    |      |

| Country                          | Study years | Survey/study name/citation                                                                               | Level of representativeness | Rural, urban or both | Age range as in NCD-RisC database * |       | Sample size (height) |      | Sample size (BMI) |      | Note |
|----------------------------------|-------------|----------------------------------------------------------------------------------------------------------|-----------------------------|----------------------|-------------------------------------|-------|----------------------|------|-------------------|------|------|
|                                  |             |                                                                                                          |                             |                      | Female                              | Male  | Female               | Male | Female            | Male |      |
| Chile                            | 2004-2005   | CArdiovascular Risk factors Multiple Evaluation in Latin America (CARMELA)                               | Community                   | urban                | 25-64                               | 25-64 | 202                  | 182  |                   |      |      |
| Chile                            | 2009-2010   | Encuesta Nacional de Salud                                                                               | National                    | both                 | 15+                                 | 15+   | 623                  | 441  | 191               | 169  |      |
| Chile                            | 2010-2011   | Encuesta Nacional de Consumo Alimentario                                                                 | National                    | both                 | 5+                                  | 5+    | 978                  | 837  | 631               | 591  |      |
| Chile                            | 2013        | Global School-based Student Health Survey                                                                | National                    | both                 | 13-17                               | 13-17 | 793                  | 799  | 793               | 799  |      |
| Chile                            | 2014-2015   | Latin American Study of Nutrition and Health (ELANS)                                                     | National                    | urban                | 15-65                               | 15-65 | 161                  | 176  | 56                | 62   |      |
| Chile                            | 2016-2017   | Encuesta Nacional de Salud                                                                               | National                    | both                 | 15+                                 | 15+   | 631                  | 453  | 183               | 159  |      |
| Paraguay                         | 2011        | Primera Encuesta Nacional de Factores de Riesgo de Enfermedades No Transmisibles en la Poblacion General | National                    | both                 | 15-75                               | 15-75 | 529                  | 350  | 125               | 118  |      |
| Paraguay                         | 2017        | Global School-based Student Health Survey                                                                | National                    | both                 | 12-16                               | 12-16 | 1234                 | 1119 | 1231              | 1119 |      |
| Uruguay                          | 2004        | CUiIDARTE Project                                                                                        | National                    | urban                | 5-8                                 | 5-8   | 149                  | 129  | 149               | 129  |      |
| Uruguay                          | 2005        | CUiIDARTE Project                                                                                        | National                    | urban                | 6-10                                | 6-10  | 105                  | 105  | 105               | 105  |      |
| Uruguay                          | 2006        | STEPS                                                                                                    | National                    | both                 | 25-64                               | 25-64 | 73                   | 33   |                   |      |      |
| Uruguay                          | 2009-2010   | CUiIDARTE Project                                                                                        | National                    | urban                | 10-14                               | 10-14 | 130                  | 117  | 129               | 117  |      |
| Uruguay                          | 2012        | Global School-based Student Health Survey                                                                | National                    | both                 | 13-15                               |       | 1377                 |      | 1377              |      |      |
| Uruguay                          | 2013        | STEPS                                                                                                    | National                    | urban                | 15-64                               | 15-64 | 317                  | 212  | 92                | 75   |      |
| Uruguay                          | 2012-2016   | Genotype, Phenotype and Environment of Hypertension in Uruguay (GEFA-HT-UY)                              | Community                   | urban                | 19+                                 | 19+   | 13                   | 12   |                   |      |      |
| Uruguay                          | 2015        | CUiIDARTE Project                                                                                        | National                    | urban                | 17-20                               | 17-20 | 142                  | 135  | 142               | 135  |      |
| Uruguay                          | 2016-2017   | CUiIDARTE Project                                                                                        | Community                   | urban                | 5-6                                 | 5-6   | 375                  | 395  | 375               | 395  |      |
| Uruguay                          | 2019        | Global School-based Student Health Survey                                                                | National                    | both                 | 13-16                               | 13-16 | 1026                 | 903  | 1022              | 901  |      |
| <b>Oceania</b>                   |             |                                                                                                          |                             |                      |                                     |       |                      |      |                   |      |      |
| <i>Melanesia</i>                 |             |                                                                                                          |                             |                      |                                     |       |                      |      |                   |      |      |
| Fiji                             | 2002        | STEPS                                                                                                    | National                    | both                 | 15-64                               | 15-64 | 1366                 | 954  | 412               | 321  |      |
| Fiji                             | 2005-2007   | Pacific Obesity Prevention in Communities - Healthy Youth Health Communities Study                       | Subnational                 | urban                | 11-19                               | 11-19 | 4109                 | 3730 | 4109              | 3730 |      |
| Fiji                             | 2007-2008   | Pacific Obesity Prevention in Communities - Healthy Youth Health Communities Study                       | Subnational                 | urban                | 13-22                               | 13-22 | 1832                 | 1492 | 1813              | 1479 |      |
| Fiji                             | 2010        | Global School-based Student Health Survey                                                                | National                    | both                 | 13-17                               | 13-17 | 892                  | 630  | 892               | 629  |      |
| Fiji                             | 2011        | STEPS                                                                                                    | National                    | both                 | 25-64                               | 25-64 | 162                  | 123  |                   |      |      |
| Fiji                             | 2016        | Global School-based Student Health Survey                                                                | National                    | both                 | 13-17                               | 13-17 | 1469                 | 1394 | 1469              | 1394 |      |
| Papua New Guinea                 | 2007        | STEPS                                                                                                    | National                    | both                 | 15-64                               | 15-64 | 638                  | 555  | 211               | 194  |      |
| Solomon Islands                  | 2004        | A genetic-ecological study of the risk factors for lifestyle-related diseases in Oceanian populations    | Community                   | both                 | 18-79                               | 18-79 | 58                   | 50   | 5                 | 7    |      |
| Solomon Islands                  | 2006        | STEPS                                                                                                    | Subnational                 | both                 | 15-64                               | 15-64 | 637                  | 480  | 146               | 116  |      |
| Solomon Islands                  | 2009-2010   | Furusawa et al., N Z Med J 124(1333):17-28, 2011                                                         | Subnational                 | both                 | 5+                                  | 5+    | 222                  | 172  | 155               | 148  |      |
| Solomon Islands                  | 2015        | STEPS                                                                                                    | National                    | both                 | 18-69                               | 18-69 | 215                  | 169  | 45                | 29   |      |
| Vanuatu                          | 2005        | STEPS                                                                                                    | Subnational                 | both                 | 15-60                               | 15-60 | 382                  | 316  | 122               | 104  |      |
| Vanuatu                          | 2011        | STEPS                                                                                                    | National                    | both                 | 25-64                               | 25-64 | 431                  | 384  |                   |      |      |
| <i>Polynesia and Micronesia</i>  |             |                                                                                                          |                             |                      |                                     |       |                      |      |                   |      |      |
| American Samoa                   | 1976-1978   | McGarvey, Am J Clin Nutr 53(6 Suppl):1586S-1594S, 1991                                                   | National                    | both                 | 5+                                  | 5+    | 15                   | 14   |                   |      |      |
| American Samoa                   | 2004        | STEPS                                                                                                    | National                    | both                 | 25-64                               | 25-64 | 158                  | 126  |                   |      |      |
| Cook Islands                     | 2003        | STEPS                                                                                                    | National                    | both                 | 25-64                               | 25-64 | 113                  | 80   |                   |      |      |
| Cook Islands                     | 2011        | Global School-based Student Health Survey                                                                | National                    | both                 | 13-17                               | 13-17 | 543                  | 530  | 543               | 530  |      |
| Cook Islands                     | 2013-2015   | STEPS                                                                                                    | National                    | both                 | 18-64                               | 18-64 | 119                  | 77   | 23                | 10   |      |
| Cook Islands                     | 2015        | Global School-based Student Health Survey                                                                | National                    | both                 | 13-17                               | 13-17 | 313                  | 305  | 313               | 304  |      |
| French Polynesia                 | 2010        | STEPS                                                                                                    | National                    | both                 | 18-64                               | 18-64 | 524                  | 396  | 92                | 69   |      |
| French Polynesia                 | 2015        | Global School-based Student Health Survey                                                                | National                    | both                 | 12-17                               | 12-17 | 1438                 | 1310 | 1438              | 1310 |      |
| Kiribati                         | 2004        | STEPS                                                                                                    | National                    | both                 | 15-64                               | 15-64 | 301                  | 262  | 85                | 89   |      |
| Kiribati                         | 2011        | Global School-based Student Health Survey                                                                | National                    | both                 | 13                                  |       | 156                  |      | 156               |      |      |
| Kiribati                         | 2015-2016   | STEPS                                                                                                    | National                    | both                 | 18-69                               | 18-69 | 211                  | 177  | 11                | 15   |      |
| Marshall Islands                 | 2002        | STEPS                                                                                                    | National                    | both                 | 15-64                               | 15-64 | 623                  | 367  | 212               | 155  |      |
| Marshall Islands                 | 2017-2018   | STEPS                                                                                                    | National                    | both                 | 18+                                 | 18+   | 424                  | 366  | 78                | 78   |      |
| Micronesia (Federated States of) | 2002        | STEPS                                                                                                    | Subnational                 | both                 | 25-64                               | 25-64 | 149                  | 86   |                   |      |      |
| Micronesia (Federated States of) | 2006        | STEPS                                                                                                    | Subnational                 | both                 | 15-64                               | 15-64 | 577                  | 380  | 211               | 154  |      |
| Micronesia (Federated States of) | 2008        | STEPS                                                                                                    | Subnational                 | both                 | 25-64                               | 25-64 | 205                  | 119  |                   |      |      |
| Micronesia (Federated States of) | 2009        | STEPS, Yap                                                                                               | Subnational                 | both                 | 15-64                               | 15-64 | 127                  | 117  | 11                | 31   |      |
| Micronesia (Federated States of) | 2009        | STEPS, Kosrae                                                                                            | Subnational                 | both                 | 15-64                               | 15-64 | 64                   | 31   |                   |      |      |
| Micronesia (Federated States of) | 2016        | STEPS                                                                                                    | Subnational                 | both                 | 18-69                               | 18-69 | 124                  | 62   | 15                | 7    |      |
| Nauru                            | 2004        | STEPS                                                                                                    | National                    | both                 | 15-64                               | 15-64 | 430                  | 404  | 119               | 122  |      |
| Nauru                            | 2006        | STEPS                                                                                                    | National                    | both                 | 16-65                               | 16-65 | 87                   | 87   | 18                | 24   |      |
| Nauru                            | 2011        | Global School-based Student Health Survey                                                                | National                    | both                 | 13-17                               |       | 259                  |      | 259               |      |      |
| Nauru                            | 2015        | STEPS                                                                                                    | National                    | both                 | 18-69                               | 18-69 | 188                  | 200  | 22                | 30   |      |
| Niue                             | 2010        | Global School-based Student Health Survey                                                                | National                    | both                 | 13-17                               | 13-17 | 38                   | 63   | 38                | 63   |      |
| Niue                             | 2011        | STEPS                                                                                                    | National                    | both                 | 15+                                 | 15+   | 130                  | 117  | 36                | 55   |      |
| Niue                             | 2019        | Global School-based Student Health Survey                                                                | National                    | both                 | 12-17                               | 12-17 | 65                   | 51   | 64                | 51   |      |
| Palau                            | 2011-2013   | STEPS                                                                                                    | National                    | both                 | 25-64                               | 25-64 | 90                   | 88   |                   |      |      |
| Palau                            | 2016        | STEPS                                                                                                    | National                    | both                 | 18+                                 | 18+   | 89                   | 108  | 13                | 13   |      |
| Samoa                            | 1979-1982   | McGarvey, Am J Clin Nutr 53(6 Suppl):1586S-1594S, 1991                                                   | National                    | both                 | 5+                                  | 5+    | 91                   | 123  |                   |      |      |
| Samoa                            | 2002        | STEPS                                                                                                    | National                    | both                 | 25-64                               | 25-64 | 242                  | 223  |                   |      |      |
| Samoa                            | 2010        | Samoa Genome-Wide Association Study                                                                      | National                    | both                 | 24-65                               | 24-65 | 250                  | 182  |                   |      | 9    |
| Samoa                            | 2013        | STEPS                                                                                                    | National                    | both                 | 18-64                               | 18-64 | 297                  | 202  | 41                | 29   |      |



| Country           | Study years | Survey/study name/citation                                                                                                  | Level of representativeness | Rural, urban or both | Age range as in NCD-RisC database * |       | Sample size (height) |      | Sample size (BMI) |      | Note |
|-------------------|-------------|-----------------------------------------------------------------------------------------------------------------------------|-----------------------------|----------------------|-------------------------------------|-------|----------------------|------|-------------------|------|------|
|                   |             |                                                                                                                             |                             |                      | Female                              | Male  | Female               | Male | Female            | Male |      |
| Tokelau           | 2005        | STEPS                                                                                                                       | National                    | both                 | 15-64                               | 15-64 | 105                  | 101  | 43                | 44   |      |
| Tokelau           | 2014        | STEPS                                                                                                                       | National                    | both                 | 18-64                               | 18-64 | 85                   | 88   | 16                | 19   |      |
| Tonga             | 2004        | STEPS                                                                                                                       | National                    | both                 | 15-64                               | 15-64 | 107                  | 95   | 24                | 27   |      |
| Tonga             | 2005-2007   | Pacific Obesity Prevention in Communities - Ma'alahi Youth Project                                                          | Subnational                 | rural                | 11-19                               | 11-19 | 1445                 | 1206 | 1445              | 1206 |      |
| Tonga             | 2007-2008   | Pacific Obesity Prevention in Communities - Ma'alahi Youth Project                                                          | Subnational                 | rural                | 13-22                               | 13-22 | 584                  | 437  | 529               | 407  |      |
| Tonga             | 2010        | Global School-based Student Health Survey                                                                                   | National                    | both                 | 13-17                               | 13-17 | 1069                 | 927  | 1069              | 926  |      |
| Tonga             | 2011        | STEPS                                                                                                                       | National                    | both                 | 15-64                               | 15-64 | 175                  | 78   |                   |      |      |
| Tonga             | 2017        | Global School-based Student Health Survey                                                                                   | National                    | both                 | 12-17                               | 12-17 | 1452                 | 1254 | 1452              | 1254 |      |
| Tonga             | 2017        | STEPS                                                                                                                       | National                    | both                 | 18-69                               | 18-69 | 508                  | 290  | 59                | 45   |      |
| Tuvalu            | 2013        | Global School-based Student Health Survey                                                                                   | National                    | both                 | 13-17                               | 13-17 | 215                  | 211  | 215               | 210  |      |
| Tuvalu            | 2015        | STEPS                                                                                                                       | National                    | both                 | 18-69                               | 18-69 | 132                  | 134  | 17                | 22   |      |
| <b>South Asia</b> |             |                                                                                                                             |                             |                      |                                     |       |                      |      |                   |      |      |
| Afghanistan       | 2013        | National Nutrition Survey                                                                                                   | National                    | both                 | 10-49                               |       | 13361                |      | 6443              |      |      |
| Afghanistan       | 2018        | STEPS                                                                                                                       | National                    | both                 | 18-69                               | 18-69 | 638                  | 692  | 145               | 139  |      |
| Bangladesh        | 1996-1997   | DHS                                                                                                                         | National                    | both                 | 20-49                               |       | 2536                 |      |                   |      |      |
| Bangladesh        | 1999-2000   | DHS                                                                                                                         | National                    | both                 | 20-49                               |       | 2852                 |      |                   |      |      |
| Bangladesh        | 2002        | STEPS                                                                                                                       | National                    | both                 | 25-64                               | 25-64 | 982                  | 912  |                   |      |      |
| Bangladesh        | 2004        | DHS                                                                                                                         | National                    | both                 | 20-49                               |       | 4187                 |      |                   |      |      |
| Bangladesh        | 2006        | Urban Health Survey                                                                                                         | Subnational                 | urban                | 20-59                               | 20-59 | 2562                 | 2349 |                   |      |      |
| Bangladesh        | 2007        | DHS                                                                                                                         | National                    | both                 | 20-49                               |       | 4060                 |      |                   |      |      |
| Bangladesh        | 2009-2010   | STEPS                                                                                                                       | National                    | both                 | 25+                                 | 25+   | 1139                 | 588  |                   |      |      |
| Bangladesh        | 2011        | DHS                                                                                                                         | National                    | both                 | 20+                                 | 15+   | 6837                 | 858  |                   | 15   |      |
| Bangladesh        | 2011-2012   | Chronic Disease Risk Factor Study                                                                                           | Community                   | rural                | 14+                                 | 14+   | 187                  | 116  | 60                | 47   |      |
| Bangladesh        | 2013        | STEPS                                                                                                                       | National                    | both                 | 25+                                 | 25+   | 495                  | 279  |                   |      |      |
| Bangladesh        | 2014        | Global School-based Student Health Survey                                                                                   | National                    | both                 | 11-13                               |       | 447                  |      | 447               |      |      |
| Bangladesh        | 2014        | DHS                                                                                                                         | National                    | both                 | 20-49                               |       | 6441                 |      |                   |      |      |
| Bangladesh        | 2015-2016   | An Assessment of BRAC Health Nutrition and Population Programme and Benchmark Survey of Sustainable Development Goal - 2015 | National                    | rural                | 11+                                 | 35+   | 10262                |      | 4025              |      |      |
| Bangladesh        | 2018        | STEPS                                                                                                                       | National                    | both                 | 18-69                               | 18-69 | 1079                 | 765  | 162               | 118  |      |
| Bangladesh        | 2017-2018   | DHS                                                                                                                         | National                    | both                 | 15-49                               |       | 6973                 |      |                   |      |      |
| Bangladesh        | 2018-2019   | National Nutrition Surveillance                                                                                             | National                    | both                 | 10+                                 | 10+   | 6521                 | 6136 | 4849              | 4894 |      |
| Bhutan            | 2007        | STEPS                                                                                                                       | Community                   | urban                | 25-74                               | 25-74 | 152                  | 119  |                   |      |      |
| Bhutan            | 2014        | STEPS                                                                                                                       | National                    | both                 | 18-69                               | 18-69 | 417                  | 196  | 28                | 11   |      |
| Bhutan            | 2019        | STEPS                                                                                                                       | National                    | both                 | 15-69                               | 15-69 | 844                  | 482  | 125               | 103  |      |
| India             | 1975-1979   | National Nutrition Monitoring Bureau rural survey                                                                           | National                    | rural                | 5+                                  | 5+    | 3095                 | 3831 |                   |      |      |
| India             | 1980        | National Nutrition Monitoring Bureau rural survey (Andhra Pradesh)                                                          | Subnational                 | rural                | 5-59                                | 5-59  | 496                  | 613  |                   |      |      |
| India             | 1980        | National Nutrition Monitoring Bureau rural survey (Gujarat)                                                                 | Subnational                 | rural                | 5-59                                | 5-59  | 129                  | 145  |                   |      |      |
| India             | 1980        | National Nutrition Monitoring Bureau rural survey (Karnataka)                                                               | Subnational                 | rural                | 5-59                                | 5-59  | 381                  | 348  |                   |      |      |
| India             | 1980        | National Nutrition Monitoring Bureau rural survey (Kerala)                                                                  | Subnational                 | rural                | 5-59                                | 5-59  | 79                   | 80   |                   |      |      |
| India             | 1980        | National Nutrition Monitoring Bureau rural survey (Orissa)                                                                  | Subnational                 | rural                | 5-59                                | 5-59  | 178                  | 124  |                   |      |      |
| India             | 1980        | National Nutrition Monitoring Bureau rural survey (Tamil Nadu)                                                              | Subnational                 | rural                | 5-59                                | 5-59  | 273                  | 320  |                   |      |      |
| India             | 1980        | National Nutrition Monitoring Bureau rural survey (Uttar Pradesh)                                                           | Subnational                 | rural                | 5-59                                | 5-59  | 176                  | 233  |                   |      |      |
| India             | 1980        | National Nutrition Monitoring Bureau rural survey (West Bengal)                                                             | Subnational                 | rural                | 5-59                                | 5-59  | 347                  | 365  |                   |      |      |
| India             | 1981        | National Nutrition Monitoring Bureau rural survey (Andhra Pradesh)                                                          | Subnational                 | rural                | 5-59                                | 5-59  | 346                  | 436  |                   |      |      |
| India             | 1981        | National Nutrition Monitoring Bureau rural survey (Karnataka)                                                               | Subnational                 | rural                | 5-59                                | 5-59  | 268                  | 274  |                   |      |      |
| India             | 1981        | National Nutrition Monitoring Bureau rural survey (Maharashtra)                                                             | Subnational                 | rural                | 5-59                                | 5-59  | 201                  | 203  |                   |      |      |
| India             | 1981        | National Nutrition Monitoring Bureau rural survey (Orissa)                                                                  | Subnational                 | rural                | 5-59                                | 5-59  | 96                   | 112  |                   |      |      |
| India             | 1981        | National Nutrition Monitoring Bureau rural survey (Tamil Nadu)                                                              | Subnational                 | rural                | 5-59                                | 5-59  | 319                  | 404  |                   |      |      |
| India             | 1981        | National Nutrition Monitoring Bureau rural survey (Uttar Pradesh)                                                           | Subnational                 | rural                | 5-59                                | 5-59  | 129                  | 187  |                   |      |      |
| India             | 1981        | National Nutrition Monitoring Bureau rural survey (West Bengal)                                                             | Subnational                 | rural                | 5-59                                | 5-59  | 213                  | 227  |                   |      |      |
| India             | 1982        | National Nutrition Monitoring Bureau rural survey (Andhra Pradesh)                                                          | Subnational                 | rural                | 5-59                                | 5-59  | 230                  | 297  |                   |      |      |
| India             | 1982        | National Nutrition Monitoring Bureau rural survey (Gujarat)                                                                 | Subnational                 | rural                | 5-59                                | 5-59  | 132                  | 143  |                   |      |      |
| India             | 1982        | National Nutrition Monitoring Bureau rural survey (Karnataka)                                                               | Subnational                 | rural                | 5-59                                | 5-59  | 262                  | 273  |                   |      |      |
| India             | 1982        | National Nutrition Monitoring Bureau rural survey (Kerala)                                                                  | Subnational                 | rural                | 5-59                                | 5-59  | 140                  | 137  |                   |      |      |
| India             | 1982        | National Nutrition Monitoring Bureau rural survey (Maharashtra)                                                             | Subnational                 | rural                | 5-59                                | 5-59  | 293                  | 387  |                   |      |      |
| India             | 1982        | National Nutrition Monitoring Bureau rural survey (Orissa)                                                                  | Subnational                 | rural                | 5-59                                | 5-59  | 108                  | 102  |                   |      |      |
| India             | 1982        | National Nutrition Monitoring Bureau rural survey (Tamil Nadu)                                                              | Subnational                 | rural                | 5-59                                | 5-59  | 337                  | 380  |                   |      |      |
| India             | 1982        | National Nutrition Monitoring Bureau rural survey (West Bengal)                                                             | Subnational                 | rural                | 5-59                                | 5-59  | 43                   | 53   |                   |      |      |
| India             | 1982-1983   | Bengali School Children                                                                                                     | Community                   | urban                |                                     | 7-21  |                      | 514  |                   |      |      |
| India             | 1983-1984   | National Nutrition Monitoring Bureau rural survey (Andhra Pradesh)                                                          | Subnational                 | rural                | 5-59                                | 5-59  | 554                  | 486  |                   |      |      |
| India             | 1983-1984   | National Nutrition Monitoring Bureau rural survey (Gujarat)                                                                 | Subnational                 | rural                | 5-59                                | 5-59  | 618                  | 641  |                   |      |      |
| India             | 1983-1984   | National Nutrition Monitoring Bureau rural survey (Orissa)                                                                  | Subnational                 | rural                | 5-59                                | 5-59  | 516                  | 515  |                   |      |      |
| India             | 1983-1984   | National Nutrition Monitoring Bureau rural survey (Tamil Nadu)                                                              | Subnational                 | rural                | 5-59                                | 5-59  | 565                  | 586  |                   |      |      |
| India             | 1990        | National Nutrition Monitoring Bureau rural survey                                                                           | National                    | rural                | 5+                                  | 5+    | 3464                 | 3141 | 3464              | 3139 |      |
| India             | 1995-1996   | Epidemiology of blood pressure across cross-cultural populations of Visakhapatnam district, Andhra Pradesh, India           | Community                   | rural                | 19-76                               | 19-76 | 54                   | 47   | 2                 |      |      |
| India             | 1996        | Nutrition Profile of Indians (Amritsar District, Punjab)                                                                    | Subnational                 | rural                | 5-59                                | 5-59  | 407                  | 342  |                   |      |      |
| India             | 1996        | Nutrition Profile of Indians (Bhatinda District, Punjab)                                                                    | Subnational                 | rural                | 5-59                                | 5-59  | 347                  | 292  |                   |      |      |

| Country | Study years | Survey/study name/citation                                                                                                            | Level of representativeness | Rural, urban or both | Age range as in NCD-RisC database * |       | Sample size (height) |        | Sample size (BMI) |        | Note |
|---------|-------------|---------------------------------------------------------------------------------------------------------------------------------------|-----------------------------|----------------------|-------------------------------------|-------|----------------------|--------|-------------------|--------|------|
|         |             |                                                                                                                                       |                             |                      | Female                              | Male  | Female               | Male   | Female            | Male   |      |
| India   | 1996        | Nutrition Profile of Indians (Faridkot District, Punjab)                                                                              | Subnational                 | rural                | 5-59                                | 5-59  | 343                  | 279    |                   |        |      |
| India   | 1996        | Nutrition Profile of Indians (Ferozpur District, Punjab)                                                                              | Subnational                 | rural                | 5-59                                | 5-59  | 417                  | 291    |                   |        |      |
| India   | 1996        | Nutrition Profile of Indians (Gurdaspur District, Punjab)                                                                             | Subnational                 | rural                | 5-59                                | 5-59  | 395                  | 360    |                   |        |      |
| India   | 1996        | Nutrition Profile of Indians (Hoshiarpur District, Punjab)                                                                            | Subnational                 | rural                | 5-59                                | 5-59  | 248                  | 226    |                   |        |      |
| India   | 1996        | Nutrition Profile of Indians (Jind District, Haryana)                                                                                 | Subnational                 | rural                | 5-59                                | 5-59  | 311                  | 292    |                   |        |      |
| India   | 1996        | Nutrition Profile of Indians (Kaithal District, Haryana)                                                                              | Subnational                 | rural                | 5-59                                | 5-59  | 289                  | 308    |                   |        |      |
| India   | 1996        | Nutrition Profile of Indians (Karnal District, Haryana)                                                                               | Subnational                 | rural                | 5-59                                | 5-59  | 220                  | 134    |                   |        |      |
| India   | 1996        | Nutrition Profile of Indians (Kurkshetra District, Haryana)                                                                           | Subnational                 | rural                | 5-59                                | 5-59  | 269                  | 218    |                   |        |      |
| India   | 1996        | Nutrition Profile of Indians (Mahendragarh District, Haryana)                                                                         | Subnational                 | rural                | 5-59                                | 5-59  | 334                  | 299    |                   |        |      |
| India   | 1996-1997   | National Nutrition Monitoring Bureau rural survey                                                                                     | National                    | rural                | 5+                                  | 5+    | 17589                | 13591  | 10790             | 10093  |      |
| India   | 1997        | Ramachandran et al., Diabetes Res Clin Pract 44(3):207-13, 1999                                                                       | Community                   | rural                | 20-74                               | 20-74 | 385                  | 264    |                   |        |      |
| India   | 1996-1999   | Chennai Urban Population Study                                                                                                        | Community                   | urban                | 20+                                 | 20+   | 136                  | 138    |                   |        |      |
| India   | 1998-1999   | DHS                                                                                                                                   | National                    | both                 | 20-49                               |       | 31749                |        |                   |        |      |
| India   | 2000        | Ramachandran et al., Diabet Med 20(3):220-24, 2003                                                                                    | Subnational                 | urban                | 20-75                               | 20-75 | 1299                 | 1257   |                   |        |      |
| India   | 1999-2001   | Jaipur Heart Watch 2                                                                                                                  | Community                   | urban                | 20-75                               | 20-75 | 88                   | 91     |                   |        |      |
| India   | 1998-2002   | Vellore Birth Cohort                                                                                                                  | Subnational                 | both                 | 25-31                               | 25-31 | 963                  | 1094   |                   |        |      |
| India   | 1999-2002   | Bengali School Children                                                                                                               | Community                   | urban                |                                     | 7-21  |                      | 1152   |                   | 1152   |      |
| India   | 2000-2001   | National Nutrition Monitoring Bureau rural survey                                                                                     | National                    | rural                | 5+                                  | 5+    | 14500                | 10281  | 8479              | 7615   |      |
| India   | 1999-2002   | New Delhi Birth Cohort                                                                                                                | Community                   | urban                | 26-33                               | 26-33 | 457                  | 633    |                   |        |      |
| India   | 2001-2002   | Nutrition Profile of Indians (Chamoli District, Uttar Pradesh)                                                                        | Subnational                 | rural                | 5-59                                | 5-59  | 432                  | 350    |                   |        |      |
| India   | 2001-2002   | Nutrition Profile of Indians (Dehradun District, Uttar Pradesh)                                                                       | Subnational                 | rural                | 5-59                                | 5-59  | 421                  | 321    |                   |        |      |
| India   | 2001-2002   | Nutrition Profile of Indians (Orissa)                                                                                                 | Subnational                 | rural                | 5-59                                | 5-59  | 13886                | 12019  |                   |        |      |
| India   | 2001-2002   | Nutrition Profile of Indians (Pauri District, Uttar Pradesh)                                                                          | Subnational                 | rural                | 5-59                                | 5-59  | 286                  | 221    |                   |        |      |
| India   | 2001-2002   | Nutrition Profile of Indians (Tehrigarhwal District, Uttar Pradesh)                                                                   | Subnational                 | rural                | 5-59                                | 5-59  | 354                  | 291    |                   |        |      |
| India   | 2001-2002   | Nutrition Profile of Indians (Uttarkashi District, Uttar Pradesh)                                                                     | Subnational                 | rural                | 5-59                                | 5-59  | 471                  | 367    |                   |        |      |
| India   | 2001-2002   | Nutrition Profile of Indians (West Bengal)                                                                                            | Subnational                 | rural                | 5-59                                | 5-59  | 6856                 | 4460   |                   |        |      |
| India   | 2002-2003   | Blood pressure epidemiology in tribal, rural and urban communities of Orissa with special reference to physical and social parameters | Community                   | rural                | 18-80                               | 18-80 | 61                   | 56     | 9                 | 7      |      |
| India   | 2001-2004   | Chennai Urban Rural Epidemiology Study                                                                                                | Community                   | urban                | 20+                                 | 20+   | 327                  | 237    |                   |        |      |
| India   | 2003-2004   | ICMR RF RHD Registry, Jai Vigyan Mission Mode, Kochi                                                                                  | Subnational                 | both                 | 5-16                                | 5-16  | 13515                | 11327  | 13515             | 11327  |      |
| India   | 2003-2005   | STEPS, Ballabgarh                                                                                                                     | Subnational                 | both                 | 15-69                               | 15-69 | 883                  | 841    | 187               | 283    |      |
| India   | 2003-2005   | STEPS, Chennai                                                                                                                        | Subnational                 | both                 | 15-69                               | 15-69 | 787                  | 788    | 212               | 252    |      |
| India   | 2003-2005   | STEPS, Delhi                                                                                                                          | Subnational                 | urban                | 15-69                               | 15-69 | 344                  | 397    | 145               | 137    |      |
| India   | 2003-2005   | STEPS, Dibrugarh                                                                                                                      | Subnational                 | both                 | 15-69                               | 15-69 | 901                  | 769    | 201               | 218    |      |
| India   | 2003-2005   | STEPS, Nagpur                                                                                                                         | Subnational                 | both                 | 15-69                               | 15-69 | 768                  | 772    | 158               | 198    |      |
| India   | 2003-2005   | STEPS, Trivandrum                                                                                                                     | Subnational                 | both                 | 15-69                               | 15-69 | 762                  | 691    | 200               | 262    |      |
| India   | 2003-2004   | Jaipur Heart Watch 3                                                                                                                  | Community                   | urban                | 20-75                               | 20-75 | 39                   | 32     |                   |        |      |
| India   | 2004-2005   | India Human Development Survey                                                                                                        | National                    | both                 | 8-11                                | 8-11  | 6435                 | 6999   | 6400              | 6948   | 10   |
| India   | 2005-2006   | DHS                                                                                                                                   | National                    | both                 | 15-49                               | 15-54 | 66021                | 35133  | 22318             | 12515  |      |
| India   | 2005-2006   | Risk factor profile for chronic non-communicable diseases: Results of a community-based study in Kerala, India                        | Community                   | both                 | 15-64                               | 15-64 | 870                  | 796    | 209               | 273    |      |
| India   | 2005-2006   | ICMR RF RHD Registry, Jai Vigyan Mission Mode, Kochi                                                                                  | Subnational                 | both                 | 5-16                                | 5-16  | 10509                | 9754   | 10509             | 9754   |      |
| India   | 2005-2006   | National Nutrition Monitoring Bureau rural survey                                                                                     | National                    | rural                | 5+                                  | 5+    | 13320                | 10564  | 7648              | 7133   |      |
| India   | 2006        | Ramachandran et al., Diabetes Care 31(5):893-98, 2008                                                                                 | Community                   | both                 | 20+                                 | 20+   | 979                  | 1085   |                   |        |      |
| India   | 2005-2007   | Prevalence of cardiovascular risk factors in rural Tamil Nadu                                                                         | Community                   | rural                | 25-64                               | 25-64 | 1090                 | 1001   |                   |        |      |
| India   | 2006-2007   | Jaipur Heart Watch 4                                                                                                                  | Community                   | urban                | 20-75                               | 20-75 | 135                  | 79     |                   |        |      |
| India   | 2006-2008   | Kashmiri Young Adults                                                                                                                 | Subnational                 | both                 | 20-40                               | 20-40 | 445                  | 916    |                   |        |      |
| India   | 2005-2011   | Bengali School Children                                                                                                               | Community                   | urban                | 7-21                                | 7-21  | 2183                 | 847    | 1884              | 580    |      |
| India   | 2007-2008   | Integrated Disease Surveillance Project Non-communicable Disease Risk Factors Survey, Andhra                                          | Subnational                 | both                 | 15-64                               | 15-64 | 1173                 | 798    | 239               | 221    |      |
| India   | 2007-2008   | Integrated Disease Surveillance Project Non-communicable Disease Risk Factors Survey, Kerala                                          | Subnational                 | both                 | 15-64                               | 15-64 | 747                  | 459    | 159               | 194    |      |
| India   | 2007-2008   | Integrated Disease Surveillance Project Non-communicable Disease Risk Factors Survey, Madhya                                          | Subnational                 | both                 | 15-64                               | 15-64 | 992                  | 1020   | 250               | 365    |      |
| India   | 2007-2008   | Integrated Disease Surveillance Project Non-communicable Disease Risk Factors Survey, Maharashtra                                     | Subnational                 | both                 | 15-64                               | 15-64 | 957                  | 937    | 273               | 309    |      |
| India   | 2007-2008   | Integrated Disease Surveillance Project Non-communicable Disease Risk Factors Survey, Mizoram                                         | Subnational                 | both                 | 15-64                               | 15-64 | 971                  | 846    | 264               | 257    |      |
| India   | 2007-2008   | Integrated Disease Surveillance Project Non-communicable Disease Risk Factors Survey, Tamil                                           | Subnational                 | both                 | 15-64                               | 15-64 | 978                  | 572    | 191               | 177    |      |
| India   | 2007-2008   | Integrated Disease Surveillance Project Non-communicable Disease Risk Factors Survey, Uttarakhand                                     | Subnational                 | both                 | 15-64                               | 15-64 | 1199                 | 769    | 336               | 319    |      |
| India   | 2007-2009   | Prevalence of NCD risk factor in people above 15 year in rural area Nagpur using WHO STEP approach                                    | Community                   | rural                | 15+                                 | 15+   | 609                  | 694    | 256               | 262    |      |
| India   | 2008-2010   | ICMR-India Diabetes (INDIAB) Study, Phase I                                                                                           | National                    | both                 | 20+                                 | 20+   | 2033                 | 1800   |                   |        |      |
| India   | 2009-2010   | Baseline Survey for the assessment of prevalence of risk factors of NCDs in Gandhinagar District                                      | Community                   | both                 | 15-64                               | 15-64 | 524                  | 598    | 146               | 224    |      |
| India   | 2009-2010   | Jaipur Heart Watch 5                                                                                                                  | Community                   | urban                | 20-75                               | 20-75 | 20                   | 67     |                   |        |      |
| India   | 2010        | Kerala 2010 follow-up                                                                                                                 | Community                   | rural                | 21-70                               | 21-70 | 32                   | 41     |                   |        |      |
| India   | 2011-2012   | Body Mass Index, Social Conditions and Environmental Effect on High Blood Pressure among the Adolescent School Children               | National                    | both                 | 12-16                               | 12-16 | 1161                 | 1097   | 1161              | 1096   |      |
| India   | 2011-2012   | India Human Development Survey                                                                                                        | National                    | both                 | 8-11                                | 8-11  | 5783                 | 6309   | 5758              | 6285   | 11   |
| India   | 2011-2013   | International Study of Childhood Obesity, Lifestyle and the Environment (ISCOLE)                                                      | Community                   | urban                | 9-11                                | 9-11  | 328                  | 292    | 328               | 292    |      |
| India   | 2011-2012   | National Nutrition Monitoring Bureau rural survey                                                                                     | National                    | rural                | 5+                                  | 5+    | 21149                | 17159  | 12403             | 11621  |      |
| India   | 2012-2013   | Health Survey in Anand School Children                                                                                                | Community                   | both                 | 5-13                                | 5-13  | 961                  | 1630   | 959               | 1628   |      |
| India   | 2012-2013   | District Level Household and Facility Survey (DLHS) 4                                                                                 | National                    | both                 | 5+                                  | 5+    | 271681               | 253224 | 152769            | 157993 |      |
| India   | 2012-2013   | ICMR-India Diabetes (INDIAB) Study, Phase II                                                                                          | Subnational                 | both                 | 20+                                 | 20+   | 2461                 | 1676   |                   |        |      |
| India   | 2012-2014   | Jaipur Heart Watch 6                                                                                                                  | Community                   | urban                | 20-75                               | 20-75 | 56                   | 91     |                   |        |      |

| Country                   | Study years | Survey/study name/citation                                                                                                           | Level of representativeness | Rural, urban or both | Age range as in NCD-RisC database * |       | Sample size (height) |        | Sample size (BMI) |        | Note |
|---------------------------|-------------|--------------------------------------------------------------------------------------------------------------------------------------|-----------------------------|----------------------|-------------------------------------|-------|----------------------|--------|-------------------|--------|------|
|                           |             |                                                                                                                                      |                             |                      | Female                              | Male  | Female               | Male   | Female            | Male   |      |
| India                     | 2014        | Annual Health Survey: Clinical, Anthropometric and Bio-chemical                                                                      | National                    | both                 | 5+                                  | 5+    | 366551               | 361281 | 230014            | 245191 |      |
| India                     | 2012-2015   | ICMR-India Diabetes (INDIAB) Study, North East Phase                                                                                 | Subnational                 | both                 | 20+                                 | 20+   | 3273                 | 2209   |                   |        |      |
| India                     | 2015-2016   | DHS                                                                                                                                  | National                    | both                 | 15-49                               | 15-54 | 356491               | 50210  | 118744            | 18490  |      |
| India                     | 2015-2016   | Diet and nutritional status of urban population and prevalence of hypertension                                                       | National                    | urban                | 5+                                  | 5+    | 34512                | 30065  | 18822             | 19180  |      |
| India                     | 2016-2017   | Secular TRends in DiabEtes in India (STRIDE-I) -Change in Prevalence in Ten Years among Urban and Rural Populations in Tamil Nadu    | Community                   | both                 | 20+                                 | 20+   | 969                  | 767    |                   |        |      |
| India                     | 2019-2021   | DHS                                                                                                                                  | National                    | both                 | 15-49                               | 15-54 | 346224               | 42508  | 114078            | 15572  |      |
| Nepal                     | 1996        | DHS                                                                                                                                  | National                    | both                 | 20-49                               |       | 2216                 |        |                   |        |      |
| Nepal                     | 2001        | DHS                                                                                                                                  | National                    | both                 | 20-49                               |       | 3290                 |        |                   |        |      |
| Nepal                     | 2005        | STEPS                                                                                                                                | Subnational                 | both                 | 15-64                               | 15-64 | 1311                 | 1066   | 346               | 358    |      |
| Nepal                     | 2006        | DHS                                                                                                                                  | National                    | both                 | 15-49                               |       | 6224                 |        | 2283              |        |      |
| Nepal                     | 2007-2008   | STEPS                                                                                                                                | National                    | both                 | 15-64                               | 15-64 | 827                  | 687    | 245               | 259    |      |
| Nepal                     | 2006-2011   | Early detection and management of Kidney disease, Hypertension, Diabetes and Cardiovascular disease (KHDC Nepal), Tarahara           | Community                   | rural                | 18+                                 | 18+   | 661                  | 280    | 97                | 48     |      |
| Nepal                     | 2006-2011   | Early detection and management of Kidney disease, Hypertension, Diabetes and Cardiovascular disease (KHDC Nepal), Damak              | Community                   | urban                | 18+                                 | 18+   | 387                  | 256    | 43                | 37     |      |
| Nepal                     | 2006-2011   | Early detection and management of Kidney disease, Hypertension, Diabetes and Cardiovascular disease (KHDC Nepal), Dharan             | Community                   | urban                | 18+                                 | 18+   | 2083                 | 1418   | 352               | 351    |      |
| Nepal                     | 2011        | DHS                                                                                                                                  | National                    | both                 | 15-49                               |       | 3510                 |        | 1288              |        |      |
| Nepal                     | 2012-2013   | STEPS                                                                                                                                | National                    | both                 | 15-69                               | 15-69 | 682                  | 284    | 117               | 79     |      |
| Nepal                     | 2015        | Community based intervention for prevention and control of non-communicable diseases risk factors (CIPCON) baseline survey, Dhankuta | Subnational                 | rural                | 15-69                               | 15-69 | 159                  | 78     | 24                | 20     |      |
| Nepal                     | 2015        | Community based intervention for prevention and control of non-communicable diseases risk factors (CIPCON) baseline survey, Ilam     | Subnational                 | rural                | 15-69                               | 15-69 | 165                  | 96     | 26                | 18     |      |
| Nepal                     | 2016        | DHS                                                                                                                                  | National                    | both                 | 15-49                               | 15-49 | 3540                 | 2109   | 1251              | 961    |      |
| Nepal                     | 2016-2018   | The Population Based Prevalence of Selected Non-Communicable Diseases In Nepal                                                       | National                    | both                 | 20+                                 | 20+   | 1264                 | 561    |                   |        |      |
| Nepal                     | 2019        | STEPS                                                                                                                                | National                    | both                 | 15-69                               | 15-69 | 960                  | 449    | 205               | 138    |      |
| Pakistan                  | 1990-1994   | National Health Survey of Pakistan 1990-1994                                                                                         | National                    | both                 | 5+                                  | 5+    | 3480                 | 3745   | 3391              | 3636   |      |
| Pakistan                  | 1990-1994   | MHS                                                                                                                                  | Community                   | urban                | 18+                                 | 18+   |                      |        | 31                | 39     |      |
| Pakistan                  | 2005        | STEPS                                                                                                                                | National                    | both                 | 25-65                               | 25-65 | 252                  | 170    |                   |        |      |
| Pakistan                  | 2011        | National Nutrition Survey                                                                                                            | National                    | both                 | 5-49                                | 5-49  | 34697                | 17373  | 20335             | 14906  |      |
| Pakistan                  | 2012-2013   | DHS                                                                                                                                  | National                    | both                 | 20-49                               |       | 1645                 |        |                   |        |      |
| Pakistan                  | 2014        | STEPS                                                                                                                                | Subnational                 | both                 | 18-69                               | 18-69 | 1402                 | 957    | 264               | 191    |      |
| Pakistan                  | 2016-2017   | National Diabetes Survey of Pakistan                                                                                                 | National                    | both                 | 20+                                 | 20+   | 753                  | 654    |                   |        |      |
| Pakistan                  | 2018-2019   | National Nutrition Survey                                                                                                            | National                    | both                 | 5-49                                | 5-19  | 79287                | 11905  | 38605             | 11888  |      |
| Pakistan                  | 2017-2018   | DHS                                                                                                                                  | National                    | both                 | 15-49                               |       | 1978                 |        |                   |        |      |
| Sri Lanka                 | 2006        | STEPS                                                                                                                                | National                    | both                 | 15-64                               | 15-64 | 1857                 | 1822   | 519               | 688    |      |
| Sri Lanka                 | 2014        | STEPS                                                                                                                                | National                    | both                 | 18-69                               | 18-69 | 447                  | 260    | 70                | 57     |      |
| Sri Lanka                 | 2016        | Global School-based Student Health Survey                                                                                            | National                    | both                 | 13-17                               | 13-17 | 928                  | 671    | 923               | 671    |      |
| <b>Sub-Saharan Africa</b> |             |                                                                                                                                      |                             |                      |                                     |       |                      |        |                   |        |      |
| <i>Central Africa</i>     |             |                                                                                                                                      |                             |                      |                                     |       |                      |        |                   |        |      |
| Angola                    | 2013-2014   | CardioBengo - Population based cardiovascular longitudinal study in Bengo Province, Angola                                           | Community                   | both                 | 14-65                               | 14-65 | 663                  | 479    | 200               | 178    |      |
| Central African Republic  | 2010        | STEPS                                                                                                                                | Subnational                 | both                 | 25-64                               | 25-64 | 540                  | 390    |                   |        |      |
| Central African Republic  | 2017        | STEPS                                                                                                                                | Subnational                 | both                 | 25-64                               | 25-64 | 467                  | 292    |                   |        |      |
| Congo                     | 1986        | Enquête Brazzaville 1986                                                                                                             | Community                   | urban                | 5-50                                | 5-50  | 122                  | 129    |                   |        |      |
| Congo                     | 1987        | Enquête Nationale Congo 1987                                                                                                         | National                    | rural                | 13-49                               |       | 35                   |        | 252               |        | 1    |
| Congo                     | 1991        | Enquête Brazzaville 1991                                                                                                             | Community                   | urban                | 5-90                                | 5-90  | 1531                 | 1311   | 1516              | 1309   |      |
| Congo                     | 1996        | Enquête Brazzaville 1996                                                                                                             | Community                   | urban                | 5-90                                | 5-90  | 2372                 | 1716   | 1455              | 1283   |      |
| Congo                     | 2004        | STEPS                                                                                                                                | Community                   | urban                | 25-64                               | 25-64 | 303                  | 276    |                   |        |      |
| Congo                     | 2005        | DHS                                                                                                                                  | National                    | both                 | 15-49                               |       | 4177                 |        | 1388              |        |      |
| Congo                     | 2011-2012   | DHS                                                                                                                                  | National                    | both                 | 15-49                               |       | 3121                 |        | 1031              |        |      |
| DR Congo                  | 2001        | Multiple Indicator Cluster Survey 2                                                                                                  | National                    | both                 | 15-49                               |       | 2977                 |        | 464               |        |      |
| DR Congo                  | 2005        | STEPS                                                                                                                                | Subnational                 | urban                | 15+                                 | 15+   | 557                  | 362    | 204               | 150    |      |
| DR Congo                  | 2007        | DHS                                                                                                                                  | National                    | both                 | 15-49                               |       | 2901                 |        | 859               |        |      |
| DR Congo                  | 2007        | Diabetes and intermediate hyperglycaemia in Kisantu, DR Congo: a cross-sectional prevalence study                                    | Community                   | urban                | 20+                                 | 20+   | 149                  | 70     |                   |        |      |
| DR Congo                  | 2008        | Visite de la Tension Artérielle et des Facteurs de Risque Associés en Afrique subsaharienne (VITARAA) - Kinshasa, RD Congo           | Community                   | urban                | 10+                                 | 10+   | 542                  | 510    | 259               | 257    |      |
| DR Congo                  | 2008        | Visite de la Tension Artérielle et des Facteurs de Risque Associés en Afrique subsaharienne (VITARAA) - Sud-Kivu, RD Congo           | Community                   | both                 | 20+                                 | 20+   | 146                  | 81     |                   |        |      |
| DR Congo                  | 2013-2014   | DHS                                                                                                                                  | National                    | both                 | 15-49                               |       | 5544                 |        | 1791              |        |      |
| DR Congo                  | 2016-2017   | Prevalence and Risk Factors of CKD in South Kivu, Democratic Republic of Congo: A Large-Scale Population Study                       | Subnational                 | both                 | 18+                                 | 18+   | 272                  | 165    | 56                | 22     |      |
| Gabon                     | 2000        | DHS                                                                                                                                  | National                    | both                 | 20-49                               |       | 1385                 |        |                   |        |      |
| Gabon                     | 2009        | STEPS                                                                                                                                | Subnational                 | urban                | 15-64                               | 15-64 | 695                  | 321    | 157               | 77     |      |
| Gabon                     | 2012        | DHS                                                                                                                                  | National                    | both                 | 15-49                               |       | 3131                 |        | 1123              |        |      |
| <i>East Africa</i>        |             |                                                                                                                                      |                             |                      |                                     |       |                      |        |                   |        |      |
| Burundi                   | 2010        | DHS                                                                                                                                  | National                    | both                 | 15-49                               |       | 2906                 |        | 1143              |        |      |
| Burundi                   | 2016-2017   | DHS                                                                                                                                  | National                    | both                 | 15-49                               |       | 5079                 |        | 1922              |        |      |
| Comoros                   | 1996        | DHS                                                                                                                                  | National                    | both                 | 20-49                               |       | 431                  |        |                   |        |      |
| Comoros                   | 2011        | STEPS                                                                                                                                | National                    | both                 | 25-64                               | 25-64 | 837                  | 299    |                   |        |      |
| Comoros                   | 2012        | DHS                                                                                                                                  | National                    | both                 | 15-49                               |       | 3113                 |        | 1207              |        |      |
| Eritrea                   | 1995        | DHS                                                                                                                                  | National                    | both                 | 15-49                               |       | 453                  |        |                   |        |      |
| Eritrea                   | 2002        | DHS                                                                                                                                  | National                    | both                 | 15-49                               |       | 1784                 |        |                   |        |      |
| Eritrea                   | 2004        | STEPS                                                                                                                                | National                    | both                 | 15-64                               | 15-64 | 375                  | 356    | 123               | 139    |      |

| Country    | Study years | Survey/study name/citation                                                                                                                            | Level of representativeness | Rural, urban or both | Age range as in NCD-RisC database * |       | Sample size (height) |      | Sample size (BMI) |      | Note |
|------------|-------------|-------------------------------------------------------------------------------------------------------------------------------------------------------|-----------------------------|----------------------|-------------------------------------|-------|----------------------|------|-------------------|------|------|
|            |             |                                                                                                                                                       |                             |                      | Female                              | Male  | Female               | Male | Female            | Male |      |
| Eritrea    | 2010        | STEPS                                                                                                                                                 | National                    | both                 | 25-74                               | 25-74 | 911                  | 147  |                   |      |      |
| Ethiopia   | 2000        | DHS                                                                                                                                                   | National                    | both                 | 15-49                               |       | 9051                 |      | 3384              |      |      |
| Ethiopia   | 2005        | DHS                                                                                                                                                   | National                    | both                 | 15-49                               |       | 4018                 |      | 1486              |      |      |
| Ethiopia   | 2006        | STEPS                                                                                                                                                 | Subnational                 | urban                | 25-64                               | 25-64 | 372                  | 369  |                   |      |      |
| Ethiopia   | 2011        | DHS                                                                                                                                                   | National                    | both                 | 15-49                               | 15-59 | 9981                 | 7484 | 3676              | 2821 |      |
| Ethiopia   | 2015        | STEPS                                                                                                                                                 | National                    | both                 | 15-69                               | 15-69 | 2239                 | 1422 | 580               | 416  |      |
| Ethiopia   | 2016        | DHS                                                                                                                                                   | National                    | both                 | 15-49                               | 15-59 | 8919                 | 6283 | 3226              | 2446 |      |
| Ethiopia   | 2018        | Sustainable Urban Diets (SUDS) Addis Ababa                                                                                                            | Community                   | urban                | 18-49                               |       | 549                  |      | 13                |      |      |
| Ethiopia   | 2018        | Sustainable Urban Diets (SUDS) Kersa                                                                                                                  | Community                   | rural                | 18-49                               |       | 369                  |      | 7                 |      |      |
| Kenya      | 1998        | DHS                                                                                                                                                   | National                    | both                 | 20-49                               |       | 1995                 |      |                   |      |      |
| Kenya      | 2003        | DHS                                                                                                                                                   | National                    | both                 | 15-49                               |       | 4641                 |      | 1614              |      |      |
| Kenya      | 2008-2009   | DHS                                                                                                                                                   | National                    | both                 | 15-49                               |       | 4949                 |      | 1674              |      |      |
| Kenya      | 2011-2013   | International Study of Childhood Obesity, Lifestyle and the Environment (ISCOLE)                                                                      | Community                   | urban                | 9-11                                | 9-11  | 301                  | 262  | 301               | 262  |      |
| Kenya      | 2014        | DHS                                                                                                                                                   | National                    | both                 | 15-49                               |       | 8090                 |      | 2660              |      |      |
| Kenya      | 2015        | STEPS                                                                                                                                                 | National                    | both                 | 18-69                               | 18-69 | 839                  | 544  | 115               | 75   |      |
| Kenya      | 2018        | Assessing the gaps in healthcare and determining the feasibility for the setup of a social enterprise - Viwandani Lown Community Health Center, Kenya | Community                   | urban                | 19-73                               | 19-73 | 109                  | 97   | 58                | 54   |      |
| Madagascar | 1997        | DHS                                                                                                                                                   | National                    | both                 | 20-49                               |       | 1512                 |      |                   |      |      |
| Madagascar | 2003-2004   | DHS                                                                                                                                                   | National                    | both                 | 15-49                               |       | 4211                 |      | 1369              |      |      |
| Madagascar | 2005        | STEPS                                                                                                                                                 | Subnational                 | both                 | 25-64                               | 25-64 | 584                  | 581  |                   |      |      |
| Madagascar | 2008-2009   | DHS                                                                                                                                                   | National                    | both                 | 15-49                               |       | 4828                 |      | 1833              |      |      |
| Malawi     | 2000        | DHS                                                                                                                                                   | National                    | both                 | 15-49                               |       | 8139                 |      | 2557              |      |      |
| Malawi     | 2004        | DHS                                                                                                                                                   | National                    | both                 | 15-49                               |       | 6999                 |      | 2000              |      |      |
| Malawi     | 2009        | STEPS                                                                                                                                                 | National                    | both                 | 25-64                               | 25-64 | 955                  | 426  |                   |      |      |
| Malawi     | 2010        | DHS                                                                                                                                                   | National                    | both                 | 15-49                               |       | 4711                 |      | 1599              |      |      |
| Malawi     | 2013-2017   | NCD Survey Malawi Epidemiology and Intervention Research Unit                                                                                         | Community                   | both                 | 18+                                 | 18+   | 8582                 | 5207 | 1545              | 1149 |      |
| Malawi     | 2015-2016   | DHS                                                                                                                                                   | National                    | both                 | 15-49                               |       | 4767                 |      | 1569              |      |      |
| Malawi     | 2017        | STEPS                                                                                                                                                 | National                    | both                 | 18-69                               | 18-69 | 815                  | 449  | 114               | 71   |      |
| Mauritius  | 1998        | Mauritius Noncommunicable Disease Survey                                                                                                              | National                    | both                 | 25-74                               | 25-74 | 174                  | 99   |                   |      |      |
| Mauritius  | 2009        | Mauritius Noncommunicable Disease Survey                                                                                                              | National                    | both                 | 19-74                               | 19-74 | 467                  | 390  |                   |      |      |
| Mauritius  | 2011        | Global School-based Student Health Survey                                                                                                             | National                    | both                 | 13-17                               | 13-17 | 1043                 | 859  | 1043              | 859  |      |
| Mauritius  | 2011        | Global School-based Student Health Survey-Rodrigues                                                                                                   | Subnational                 | both                 | 13-17                               | 13-17 | 546                  | 425  | 546               | 425  |      |
| Mauritius  | 2015        | Mauritius Noncommunicable Disease Survey                                                                                                              | National                    | both                 | 20-74                               | 20-74 | 255                  | 217  |                   |      |      |
| Mauritius  | 2017        | Global School-based Student Health Survey                                                                                                             | National                    | both                 | 13-17                               | 13-17 | 1526                 | 1358 | 1525              | 1358 |      |
| Mauritius  | 2019        | Global School-based Student Health Survey                                                                                                             | Subnational                 | rural                | 12-17                               | 12-17 | 1289                 | 1116 | 1289              | 1116 |      |
| Mozambique | 1997        | DHS                                                                                                                                                   | National                    | both                 | 20-49                               |       | 1915                 |      |                   |      |      |
| Mozambique | 2000        | Growth of adolescents in Mozambique                                                                                                                   | Community                   | urban                | 9-17                                | 9-17  | 727                  | 690  | 727               | 690  |      |
| Mozambique | 2003        | DHS                                                                                                                                                   | National                    | both                 | 15-49                               |       | 6878                 |      | 2207              |      |      |
| Mozambique | 2005        | STEPS                                                                                                                                                 | National                    | both                 | 25-64                               | 25-64 | 417                  | 267  |                   |      |      |
| Mozambique | 2011        | DHS                                                                                                                                                   | National                    | both                 | 15-49                               |       | 7796                 |      | 2708              |      |      |
| Mozambique | 2014-2015   | STEPS                                                                                                                                                 | National                    | both                 | 15-64                               | 15-64 | 711                  | 487  | 226               | 173  |      |
| Mozambique | 2017-2018   | Examining lifestyle behaviours and weight status of primary schoolchildren in Mozambique                                                              | Community                   | both                 | 9-11                                | 9-11  | 328                  | 286  | 328               | 286  |      |
| Rwanda     | 2000        | DHS                                                                                                                                                   | National                    | both                 | 15-49                               |       | 6107                 |      | 2543              |      |      |
| Rwanda     | 2005        | DHS                                                                                                                                                   | National                    | both                 | 15-49                               |       | 3286                 |      | 1300              |      |      |
| Rwanda     | 2010        | DHS                                                                                                                                                   | National                    | both                 | 15-49                               | 15-59 | 4288                 | 3722 | 1564              | 1459 |      |
| Rwanda     | 2012        | STEPS                                                                                                                                                 | National                    | both                 | 15-64                               | 15-64 | 1646                 | 1001 | 414               | 264  |      |
| Rwanda     | 2014-2015   | DHS                                                                                                                                                   | National                    | both                 | 15-49                               | 15-59 | 3868                 | 3319 | 1388              | 1306 |      |
| Rwanda     | 2019-2020   | DHS                                                                                                                                                   | National                    | both                 | 15-49                               |       | 3830                 |      | 1647              |      |      |
| Seychelles | 1998        | School Screening Program                                                                                                                              | National                    | both                 | 5-16                                | 5-16  | 1423                 | 1564 | 1423              | 1564 |      |
| Seychelles | 1999        | School Screening Program                                                                                                                              | National                    | both                 | 5-16                                | 5-16  | 2780                 | 2657 | 2780              | 2657 |      |
| Seychelles | 2000        | School Screening Program                                                                                                                              | National                    | both                 | 5-16                                | 5-16  | 1829                 | 1778 | 1829              | 1778 |      |
| Seychelles | 2001        | School Screening Program                                                                                                                              | National                    | both                 | 5-16                                | 5-16  | 2594                 | 2622 | 2594              | 2622 |      |
| Seychelles | 2002        | School Screening Program                                                                                                                              | National                    | both                 | 5-16                                | 5-16  | 2533                 | 2495 | 2533              | 2495 |      |
| Seychelles | 2003        | School Screening Program                                                                                                                              | National                    | both                 | 5-16                                | 5-16  | 2832                 | 2814 | 2832              | 2814 |      |
| Seychelles | 2004        | School Screening Program                                                                                                                              | National                    | both                 | 5-16                                | 5-16  | 2316                 | 2359 | 2316              | 2359 |      |
| Seychelles | 2004        | Seychelles Heart Survey III                                                                                                                           | National                    | both                 | 25-64                               | 25-64 | 70                   | 55   |                   |      |      |
| Seychelles | 2005        | School Screening Program                                                                                                                              | National                    | both                 | 5-16                                | 5-16  | 2772                 | 2737 | 2771              | 2737 |      |
| Seychelles | 2006        | School Screening Program                                                                                                                              | National                    | both                 | 5-16                                | 5-16  | 2621                 | 2692 | 2621              | 2691 |      |
| Seychelles | 2007        | Global School-based Student Health Survey                                                                                                             | National                    | both                 | 13-17                               | 13-17 | 467                  | 387  | 467               | 385  |      |
| Seychelles | 2011        | School Screening Program                                                                                                                              | National                    | both                 | 5-16                                | 5-16  | 2272                 | 2300 | 2271              | 2298 |      |
| Seychelles | 2012        | School Screening Program                                                                                                                              | National                    | both                 | 5-16                                | 5-16  | 2338                 | 2300 | 2337              | 2300 |      |
| Seychelles | 2013        | School Screening Program                                                                                                                              | National                    | both                 | 5-16                                | 5-16  | 2091                 | 1942 | 2090              | 1942 |      |
| Seychelles | 2014        | School Screening Program                                                                                                                              | National                    | both                 | 5-16                                | 5-16  | 2219                 | 2145 | 2219              | 2144 |      |
| Seychelles | 2013-2014   | Seychelles Heart Survey IV                                                                                                                            | National                    | both                 | 25-64                               | 25-64 | 70                   | 45   |                   |      |      |
| Seychelles | 2015        | Global School-based Student Health Survey                                                                                                             | National                    | both                 | 13-17                               | 13-17 | 888                  | 770  | 888               | 770  |      |
| Seychelles | 2015        | School Screening Program                                                                                                                              | National                    | both                 | 5-16                                | 5-16  | 2001                 | 1994 | 2001              | 1994 |      |

| Country                | Study years | Survey/study name/citation                                                                                                            | Level of representativeness | Rural, urban or both | Age range as in NCD-RisC database * |       | Sample size (height) |      | Sample size (BMI) |      | Note |
|------------------------|-------------|---------------------------------------------------------------------------------------------------------------------------------------|-----------------------------|----------------------|-------------------------------------|-------|----------------------|------|-------------------|------|------|
|                        |             |                                                                                                                                       |                             |                      | Female                              | Male  | Female               | Male | Female            | Male |      |
| Seychelles             | 2016        | School Screening Program                                                                                                              | National                    | both                 | 5-16                                | 5-16  | 1893                 | 1780 | 1892              | 1778 |      |
| Seychelles             | 2017        | School Screening Program                                                                                                              | National                    | both                 | 5-16                                | 5-16  | 1583                 | 1521 | 1583              | 1521 |      |
| Seychelles             | 2018        | School Screening Program                                                                                                              | National                    | both                 | 8-16                                | 8-16  | 1715                 | 1752 | 1715              | 1752 |      |
| Seychelles             | 2019        | School Screening Program                                                                                                              | National                    | both                 | 8-16                                | 8-16  | 1672                 | 1624 | 1671              | 1623 |      |
| Seychelles             | 2020        | School Screening Program                                                                                                              | National                    | both                 | 8-16                                | 8-16  | 1506                 | 1398 | 1506              | 1396 |      |
| Somalia                | 2016        | The prevalence of selected risk factors for non-communicable diseases in Hargeisa, Somaliland: a cross-sectional study                | Community                   | urban                | 20-69                               | 20-69 | 301                  | 55   |                   |      |      |
| South Sudan            | 2017        | Prevalence of hypertension and associated cardiovascular risk factors among adults aged 18-69 years in Juba City, South Sudan         | Community                   | urban                | 18-69                               | 18-69 | 113                  | 88   | 9                 | 4    |      |
| Sudan                  | 2005        | STEPS                                                                                                                                 | Subnational                 | both                 | 25-64                               | 25-64 | 265                  | 166  |                   |      |      |
| Sudan                  | 2016        | STEPS                                                                                                                                 | National                    | both                 | 18-69                               | 18-69 | 1448                 | 704  | 236               | 155  |      |
| Sudan                  | 2018        | Prevalence and associated factors of hypertension among adults in Gadarif in eastern Sudan: a community-based study                   | Community                   | urban                | 18+                                 | 18+   | 72                   | 35   |                   |      |      |
| Tanzania               | 1996        | DHS                                                                                                                                   | National                    | both                 | 20-49                               |       | 2191                 |      |                   |      |      |
| Tanzania               | 1998-1999   | Bovet et al., Int J Epidemiol 31(1):240-7, 2002                                                                                       | Community                   | urban                | 25-64                               | 25-64 | 2459                 | 1176 |                   |      |      |
| Tanzania               | 2004-2005   | DHS                                                                                                                                   | National                    | both                 | 15-49                               |       | 6028                 |      | 2096              |      |      |
| Tanzania               | 2009        | Ilembula School Study                                                                                                                 | Community                   | rural                | 8-18                                | 8-18  | 450                  | 449  | 450               | 449  |      |
| Tanzania               | 2010        | DHS                                                                                                                                   | National                    | both                 | 15-49                               |       | 5642                 |      | 2054              |      |      |
| Tanzania               | 2011        | STEPS                                                                                                                                 | Subnational                 | both                 | 25-64                               | 25-64 | 322                  | 193  |                   |      |      |
| Tanzania               | 2012        | STEPS                                                                                                                                 | National                    | both                 | 25-64                               | 25-64 | 569                  | 412  |                   |      |      |
| Tanzania               | 2015-2016   | DHS                                                                                                                                   | National                    | both                 | 15-49                               |       | 7463                 |      | 2694              |      |      |
| Uganda                 | 2000-2001   | DHS                                                                                                                                   | National                    | both                 | 15-49                               |       | 4152                 |      | 1370              |      |      |
| Uganda                 | 2006        | DHS                                                                                                                                   | National                    | both                 | 15-49                               | 15-54 | 1727                 | 1300 | 589               | 565  |      |
| Uganda                 | 2011        | DHS                                                                                                                                   | National                    | both                 | 15-49                               | 15-54 | 1693                 | 1292 | 600               | 565  |      |
| Uganda                 | 2012        | Prevalence, awareness and control of hypertension in Uganda                                                                           | Subnational                 | both                 | 15+                                 | 15+   | 1394                 | 722  | 385               | 255  |      |
| Uganda                 | 2011-2013   | Gulu Health and Demographic Surveillance Site (HDSS)                                                                                  | Community                   | rural                | 5+                                  | 5+    | 3295                 | 2847 | 2392              | 2328 |      |
| Uganda                 | 2011-2012   | The Prevalence and Distribution of Non-communicable Diseases and their Risk Factors in Kasese District, Uganda                        | Subnational                 | both                 | 25-79                               | 25-79 | 34                   | 40   |                   |      |      |
| Uganda                 | 2014        | STEPS                                                                                                                                 | National                    | both                 | 18-69                               | 18-69 | 793                  | 641  | 160               | 124  |      |
| Uganda                 | 2014-2015   | Gulu Health and Demographic Surveillance Site (HDSS)                                                                                  | Community                   | rural                | 15-24                               | 15-24 | 559                  | 671  | 331               | 448  |      |
| Uganda                 | 2016        | DHS                                                                                                                                   | National                    | both                 | 15-54                               | 15-54 | 3625                 | 2880 | 1285              | 1241 |      |
| Uganda                 | 2018-2019   | Scaling up Packages of Intervention for Cardiovascular disease prevention in selected sites in Europe and Sub-Saharan Africa (SPICES) | Subnational                 | both                 | 25-70                               | 25-70 | 596                  | 353  |                   |      |      |
| Zambia                 | 1996        | DHS                                                                                                                                   | National                    | both                 | 20-49                               |       | 2394                 |      |                   |      |      |
| Zambia                 | 2001-2002   | DHS                                                                                                                                   | National                    | both                 | 15-49                               |       | 4739                 |      | 1616              |      |      |
| Zambia                 | 2007        | DHS                                                                                                                                   | National                    | both                 | 15-49                               |       | 4407                 |      | 1447              |      |      |
| Zambia                 | 2008        | STEPS                                                                                                                                 | Subnational                 | urban                | 25+                                 | 25+   | 412                  | 207  |                   |      |      |
| Zambia                 | 2013-2014   | DHS                                                                                                                                   | National                    | both                 | 15-49                               |       | 9429                 |      | 3401              |      |      |
| Zambia                 | 2017        | STEPS                                                                                                                                 | National                    | both                 | 18-69                               | 18-69 | 883                  | 584  | 207               | 109  |      |
| <i>Southern Africa</i> |             |                                                                                                                                       |                             |                      |                                     |       |                      |      |                   |      |      |
| Botswana               | 2007        | STEPS                                                                                                                                 | National                    | both                 | 25-64                               | 25-64 | 666                  | 363  |                   |      |      |
| Botswana               | 2014        | STEPS                                                                                                                                 | National                    | both                 | 15-69                               | 15-69 | 932                  | 554  | 206               | 126  |      |
| Eswatini               | 2006-2007   | DHS                                                                                                                                   | National                    | both                 | 15-49                               | 15-49 | 3025                 | 2726 | 1197              | 1249 |      |
| Eswatini               | 2014        | STEPS                                                                                                                                 | National                    | both                 | 15-69                               | 15-69 | 738                  | 509  | 231               | 204  |      |
| Lesotho                | 2004-2005   | DHS                                                                                                                                   | National                    | both                 | 15-49                               |       | 2022                 |      | 803               |      |      |
| Lesotho                | 2009-2010   | DHS                                                                                                                                   | National                    | both                 | 15-49                               | 15-59 | 2368                 | 1878 | 926               | 821  |      |
| Lesotho                | 2012        | STEPS                                                                                                                                 | National                    | both                 | 25-64                               | 25-64 | 275                  | 122  |                   |      |      |
| Lesotho                | 2014        | DHS                                                                                                                                   | National                    | both                 | 15-49                               | 15-59 | 1996                 | 1583 | 760               | 678  |      |
| Namibia                | 2005        | STEPS                                                                                                                                 | National                    | both                 | 25-64                               | 25-64 | 310                  | 242  |                   |      |      |
| Namibia                | 2006-2007   | DHS                                                                                                                                   | National                    | both                 | 15-49                               |       | 5497                 |      | 2047              |      |      |
| Namibia                | 2009        | Okambilibili Survey                                                                                                                   | Community                   | urban                | 5+                                  | 5+    | 550                  | 490  | 295               | 265  |      |
| Namibia                | 2013        | DHS                                                                                                                                   | National                    | both                 | 15-64                               |       | 2501                 |      | 841               |      |      |
| South Africa           | 1996        | Ellisras Longitudinal Study                                                                                                           | Community                   | rural                | 5-10                                | 5-10  | 535                  | 584  | 535               | 583  |      |
| South Africa           | 1997        | Ellisras Longitudinal Study                                                                                                           | Community                   | rural                | 5-11                                | 5-11  | 968                  | 1046 | 968               | 1046 |      |
| South Africa           | 1998        | DHS                                                                                                                                   | National                    | both                 | 15+                                 | 15+   | 2900                 | 2424 | 1048              | 1066 |      |
| South Africa           | 1998        | Ellisras Longitudinal Study                                                                                                           | Community                   | rural                | 5-12                                | 5-12  | 856                  | 958  | 856               | 958  |      |
| South Africa           | 1999        | Ellisras Longitudinal Study                                                                                                           | Community                   | rural                | 5-13                                | 5-13  | 917                  | 991  | 917               | 991  |      |
| South Africa           | 2000        | Ellisras Longitudinal Study                                                                                                           | Community                   | rural                | 5-14                                | 5-14  | 877                  | 936  | 877               | 936  |      |
| South Africa           | 2001        | Ellisras Longitudinal Study                                                                                                           | Community                   | rural                | 6-15                                | 6-15  | 904                  | 962  | 904               | 962  |      |
| South Africa           | 2000-2001   | Transition and Health during Urbanisation of South Africans: Children                                                                 | Subnational                 | both                 | 9-15                                | 9-15  | 640                  | 606  | 639               | 606  |      |
| South Africa           | 2002        | Ellisras Longitudinal Study                                                                                                           | Community                   | rural                | 7-16                                | 7-16  | 823                  | 890  | 823               | 890  |      |
| South Africa           | 2002        | The 1st South African National Youth Risk Behaviour Survey                                                                            | National                    | both                 | 14-18                               | 14-18 |                      |      | 4139              | 3609 |      |
| South Africa           | 2003        | DHS                                                                                                                                   | National                    | both                 | 15+                                 | 15+   | 1711                 | 1433 | 648               | 634  |      |
| South Africa           | 2003        | Ellisras Longitudinal Study                                                                                                           | Community                   | rural                | 8-17                                | 8-17  | 858                  | 911  | 858               | 911  |      |
| South Africa           | 2003-2004   | Africa Centre Biomeasure Survey                                                                                                       | Community                   | rural                | 25-49                               | 25-49 | 355                  | 176  |                   |      |      |
| South Africa           | 2008        | National Income Dynamics Study Wave I                                                                                                 | National                    | both                 | 5+                                  | 5+    | 5873                 | 5251 | 3748              | 3804 |      |
| South Africa           | 2007-2008   | Cardiometaabolic risk profile of South African Learners                                                                               | Subnational                 | both                 | 10-16                               | 10-16 | 776                  | 496  | 776               | 496  |      |
| South Africa           | 2008        | The 2nd South African National Youth Risk Behaviour Survey                                                                            | National                    | both                 | 14-18                               | 14-18 |                      |      | 4201              | 3910 |      |
| South Africa           | 2010        | Africa Centre Biomeasure Survey                                                                                                       | Community                   | rural                | 15+                                 | 15+   | 2782                 | 1836 | 1045              | 1022 |      |
| South Africa           | 2010-2011   | National Income Dynamics Study Wave II                                                                                                | National                    | both                 | 5+                                  | 5+    | 6051                 | 5440 | 3681              | 3575 |      |
| South Africa           | 2011-2013   | International Study of Childhood Obesity, Lifestyle and the Environment (ISCOLE)                                                      | Community                   | urban                | 9-11                                | 9-11  | 327                  | 222  | 327               | 222  |      |

| Country            | Study years | Survey/study name/citation                                                                                                                                                        | Level of representativeness | Rural, urban or both | Age range as in NCD-RisC database * |       | Sample size (height) |       | Sample size (BMI) |      | Note |
|--------------------|-------------|-----------------------------------------------------------------------------------------------------------------------------------------------------------------------------------|-----------------------------|----------------------|-------------------------------------|-------|----------------------|-------|-------------------|------|------|
|                    |             |                                                                                                                                                                                   |                             |                      | Female                              | Male  | Female               | Male  | Female            | Male |      |
| South Africa       | 2012        | National Income Dynamics Study Wave III                                                                                                                                           | National                    | both                 | 5+                                  | 5+    | 7919                 | 7219  | 5085              | 5087 |      |
| South Africa       | 2012        | South African National Health and Nutrition Examination Survey                                                                                                                    | National                    | both                 | 5+                                  | 5+    | 837                  | 414   |                   |      |      |
| South Africa       | 2014-2015   | National Income Dynamics Study Wave IV                                                                                                                                            | National                    | both                 | 5+                                  | 5+    | 9539                 | 8926  | 6071              | 6080 |      |
| South Africa       | 2016        | DHS                                                                                                                                                                               | National                    | both                 | 15-49                               | 15-59 | 1736                 | 1420  | 563               | 565  |      |
| South Africa       | 2017        | National Income Dynamics Study Wave V                                                                                                                                             | National                    | both                 | 5+                                  | 5+    | 9820                 | 9006  | 6323              | 6166 |      |
| South Africa       | 2017-2019   | The Exercise, Arterial Modulation and Nutrition in Youth South Africa (ExAMIN Youth SA) Study                                                                                     | Subnational                 | urban                | 5-9                                 | 5-9   | 575                  | 483   | 575               | 483  |      |
| South Africa       | 2018-2020   | Vukuzazi Study                                                                                                                                                                    | Community                   | both                 | 15+                                 | 15+   | 3901                 | 2725  | 1485              | 1436 |      |
| Zimbabwe           | 1991        | Zinyowera et al., Cent Afr J Med 40(2):33-8, 1994                                                                                                                                 | Community                   | both                 | 18+                                 | 18+   |                      |       | 113               | 119  |      |
| Zimbabwe           | 1999        | DHS                                                                                                                                                                               | National                    | both                 | 15-49                               |       | 3533                 |       | 1315              |      |      |
| Zimbabwe           | 2005-2006   | DHS                                                                                                                                                                               | National                    | both                 | 15-49                               |       | 5413                 |       | 1962              |      |      |
| Zimbabwe           | 2010-2011   | DHS                                                                                                                                                                               | National                    | both                 | 15-49                               | 15-54 | 5408                 | 4312  | 1818              | 1812 |      |
| Zimbabwe           | 2015        | DHS                                                                                                                                                                               | National                    | both                 | 15-49                               | 15-54 | 5633                 | 4597  | 2049              | 2051 |      |
| <i>West Africa</i> |             |                                                                                                                                                                                   |                             |                      |                                     |       |                      |       |                   |      |      |
| Benin              | 1996        | DHS                                                                                                                                                                               | National                    | both                 | 20-49                               |       | 1310                 |       |                   |      |      |
| Benin              | 2001        | DHS                                                                                                                                                                               | National                    | both                 | 15-49                               |       | 3576                 |       | 1118              |      |      |
| Benin              | 2006        | DHS                                                                                                                                                                               | National                    | both                 | 15-49                               |       | 9174                 |       | 2602              |      |      |
| Benin              | 2007        | STEPS                                                                                                                                                                             | Community                   | urban                | 25-64                               | 25-64 | 406                  | 243   |                   |      |      |
| Benin              | 2008        | STEPS                                                                                                                                                                             | National                    | both                 | 25-64                               | 25-64 | 563                  | 631   |                   |      |      |
| Benin              | 2011-2012   | DHS                                                                                                                                                                               | National                    | both                 | 15-49                               |       | 8635                 |       | 2699              |      |      |
| Benin              | 2015        | STEPS                                                                                                                                                                             | National                    | both                 | 18-69                               | 18-69 | 833                  | 659   | 101               | 70   |      |
| Benin              | 2017-2018   | DHS                                                                                                                                                                               | National                    | both                 | 15-49                               |       | 4589                 |       | 1538              |      |      |
| Burkina Faso       | 1998-1999   | DHS                                                                                                                                                                               | National                    | both                 | 20-49                               |       | 1818                 |       |                   |      |      |
| Burkina Faso       | 2002        | Vulnérabilité Alimentaire et Sécurité Nutritionnelle dans la Gnagna (VASN-Gnagna)                                                                                                 | Subnational                 | rural                | 5+                                  | 5+    | 2219                 | 1025  | 882               | 787  |      |
| Burkina Faso       | 2003        | DHS                                                                                                                                                                               | National                    | both                 | 15-49                               |       | 6887                 |       | 2520              |      |      |
| Burkina Faso       | 2010        | DHS                                                                                                                                                                               | National                    | both                 | 15-49                               |       | 4800                 |       | 1587              |      |      |
| Burkina Faso       | 2013        | STEPS                                                                                                                                                                             | National                    | both                 | 25-64                               | 25-64 | 634                  | 571   |                   |      |      |
| Cabo Verde         | 2007        | STEPS                                                                                                                                                                             | National                    | both                 | 25-64                               | 25-64 | 130                  | 119   |                   |      |      |
| Cabo Verde         | 2019        | STEPS                                                                                                                                                                             | National                    | both                 | 18-69                               | 18-69 | 609                  | 464   | 68                | 59   |      |
| Cameroon           | 1998        | DHS                                                                                                                                                                               | National                    | both                 | 20-49                               |       | 988                  |       |                   |      |      |
| Cameroon           | 1998-1999   | Essential Non-communicable disease Health Intervention Project (ENHIP)                                                                                                            | Community                   | both                 | 15+                                 | 15+   | 554                  | 424   | 211               | 186  |      |
| Cameroon           | 2003        | STEPS                                                                                                                                                                             | Subnational                 | urban                | 15+                                 | 15+   | 2648                 | 1744  | 898               | 631  |      |
| Cameroon           | 2004        | DHS                                                                                                                                                                               | National                    | both                 | 15-49                               |       | 3223                 |       | 1179              |      |      |
| Cameroon           | 2007        | Cameroon Burden of Diabetes - Second Survey                                                                                                                                       | Subnational                 | urban                | 18+                                 | 18+   | 1238                 | 766   |                   | 2    |      |
| Cameroon           | 2009        | National Survey of Micronutrient Status and Consumption of Fortifiable Foods                                                                                                      | National                    | both                 | 15-49                               |       | 617                  |       | 75                |      |      |
| Cameroon           | 2009-2012   | Anthropologie nutritionnelle des migrants d'Afrique centrale à la ville et en France                                                                                              | Subnational                 | both                 | 18-76                               | 18-76 | 203                  | 157   | 43                | 26   |      |
| Cameroon           | 2011        | DHS                                                                                                                                                                               | National                    | both                 | 15-49                               |       | 4945                 |       | 1741              |      |      |
| Cameroon           | 2013        | Prevalence and risk factors of chronic kidney disease in urban adult Cameroonians according to three common estimators of the glomerular filtration rate: a cross-sectional study | Community                   | urban                | 19-83                               | 19-83 | 31                   | 45    | 2                 |      |      |
| Cameroon           | 2014        | Prevalence and determinants of chronic kidney disease in rural and urban Cameroonians: A cross-sectional study                                                                    | Community                   | both                 | 20-90                               | 20-90 | 45                   | 35    |                   |      |      |
| Cameroon           | 2014-2015   | Cardiovascular risk factors screening in urban and rural areas in the Far-North Region Cameroon                                                                                   | Subnational                 | both                 | 20+                                 | 20+   | 108                  | 208   |                   |      |      |
| Cameroon           | 2018        | Prevalence and determinants of chronic kidney disease in urban adults' populations of northern Cameroon                                                                           | Community                   | urban                | 20-85                               | 20-85 | 45                   | 43    |                   |      |      |
| Cameroon           | 2018-2019   | DHS                                                                                                                                                                               | National                    | both                 | 15-64                               |       | 4141                 |       | 1558              |      |      |
| Chad               | 1996-1997   | DHS                                                                                                                                                                               | National                    | both                 | 20-49                               |       | 2254                 |       |                   |      |      |
| Chad               | 2004        | DHS                                                                                                                                                                               | National                    | both                 | 20-49                               |       | 1746                 |       |                   |      |      |
| Chad               | 2008        | STEPS                                                                                                                                                                             | Community                   | urban                | 25-64                               | 25-64 | 220                  | 240   |                   |      |      |
| Chad               | 2014-2015   | DHS                                                                                                                                                                               | National                    | both                 | 15-49                               |       | 6515                 |       | 2172              |      |      |
| Côte d'Ivoire      | 1998-1999   | DHS                                                                                                                                                                               | National                    | both                 | 15-49                               |       | 1913                 |       | 735               |      |      |
| Côte d'Ivoire      | 2005        | STEPS                                                                                                                                                                             | Subnational                 | both                 | 15-64                               | 15-64 | 1356                 | 837   | 373               | 240  |      |
| Côte d'Ivoire      | 2011-2012   | DHS                                                                                                                                                                               | National                    | both                 | 15-49                               |       | 3004                 |       | 958               |      |      |
| Gambia             | 2010        | STEPS                                                                                                                                                                             | National                    | both                 | 25-64                               | 25-64 | 775                  | 293   |                   |      |      |
| Gambia             | 2013        | DHS                                                                                                                                                                               | National                    | both                 | 15-49                               |       | 2794                 |       | 1011              |      |      |
| Gambia             | 2018        | The Gambia Micronutrient Survey (GMNS)                                                                                                                                            | National                    | both                 | 15-49                               |       | 963                  |       | 404               |      |      |
| Gambia             | 2019-2020   | DHS                                                                                                                                                                               | National                    | both                 | 15-49                               |       | 3486                 |       | 1272              |      |      |
| Ghana              | 1998        | DHS                                                                                                                                                                               | National                    | both                 | 20-49                               |       | 1098                 |       |                   |      |      |
| Ghana              | 2003        | Women's Health Study of Accra (WHSA-I)                                                                                                                                            | Community                   | urban                | 18+                                 |       | 265                  |       | 57                |      |      |
| Ghana              | 2003        | DHS                                                                                                                                                                               | National                    | both                 | 15-49                               |       | 2940                 |       | 989               |      |      |
| Ghana              | 2006        | STEPS                                                                                                                                                                             | Community                   | urban                | 25+                                 | 25+   | 321                  | 162   |                   |      |      |
| Ghana              | 2008        | DHS                                                                                                                                                                               | National                    | both                 | 15-49                               |       | 2665                 |       | 959               |      |      |
| Ghana              | 2008-2010   | Women's Health Study of Accra (WHSA-II)                                                                                                                                           | Community                   | urban                | 18+                                 |       | 621                  |       |                   |      |      |
| Ghana              | 2012-2014   | Research on Obesity and Diabetes among African Migrants (RODAM), control group                                                                                                    | Subnational                 | both                 | 25+                                 | 25+   | 174                  | 94    |                   |      |      |
| Ghana              | 2014        | DHS                                                                                                                                                                               | National                    | both                 | 15-49                               | 15-59 | 2465                 | 2051  | 857               | 871  |      |
| Ghana              | 2016-2017   | Ghana Living Standards Survey                                                                                                                                                     | National                    | both                 | 5+                                  | 5+    | 11677                | 11734 | 8267              | 8731 |      |
| Ghana              | 2017        | Ghana Micronutrient Survey                                                                                                                                                        | National                    | both                 | 15-49                               |       | 568                  |       | 217               |      |      |
| Ghana              | 2018        | Intervention to reduce cardiovascular disease risk factors among secondary school students: Randomised controlled trial - Baseline                                                | Subnational                 | both                 | 14-19                               | 14-19 | 437                  | 411   | 437               | 411  |      |
| Ghana              | 2018        | Intervention to reduce cardiovascular disease risk factors among secondary school students: Randomised controlled trial - Post-intervention study                                 | Subnational                 | both                 | 14-19                               | 14-19 | 218                  | 199   | 218               | 199  |      |
| Guinea             | 1999        | DHS                                                                                                                                                                               | National                    | both                 | 20-49                               |       | 1715                 |       |                   |      |      |

| Country               | Study years | Survey/study name/citation                                                                                                                | Level of representativeness | Rural, urban or both | Age range as in NCD-RisC database * |       | Sample size (height) |      | Sample size (BMI) |      | Note |
|-----------------------|-------------|-------------------------------------------------------------------------------------------------------------------------------------------|-----------------------------|----------------------|-------------------------------------|-------|----------------------|------|-------------------|------|------|
|                       |             |                                                                                                                                           |                             |                      | Female                              | Male  | Female               | Male | Female            | Male |      |
| Guinea                | 2005        | DHS                                                                                                                                       | National                    | both                 | 15-49                               |       | 2033                 |      | 740               |      |      |
| Guinea                | 2009        | STEPS                                                                                                                                     | Subnational                 | both                 | 15-64                               | 15-64 | 657                  | 432  | 203               | 149  |      |
| Guinea                | 2012        | DHS                                                                                                                                       | National                    | both                 | 15-49                               |       | 2708                 |      | 997               |      |      |
| Guinea                | 2018        | DHS                                                                                                                                       | National                    | both                 | 15-49                               |       | 3069                 |      | 1176              |      |      |
| Guinea Bissau         | 2010        | Multiple Indicator Cluster Survey                                                                                                         | National                    | both                 | 15-49                               |       | 5116                 |      | 1734              |      |      |
| Liberia               | 2006-2007   | DHS                                                                                                                                       | National                    | both                 | 15-49                               |       | 3925                 |      | 1233              |      |      |
| Liberia               | 2011        | STEPS                                                                                                                                     | National                    | both                 | 25-64                               | 25-64 | 353                  | 227  |                   |      |      |
| Liberia               | 2013        | DHS                                                                                                                                       | National                    | both                 | 15-49                               | 15-49 | 2588                 | 2183 | 939               | 865  |      |
| Liberia               | 2019        | DHS                                                                                                                                       | National                    | both                 | 15-49                               |       | 2220                 |      | 841               |      |      |
| Mali                  | 1995-1996   | DHS                                                                                                                                       | National                    | both                 | 20-49                               |       | 2331                 |      |                   |      |      |
| Mali                  | 1997        | Programme Intégré de Développement de Bafoulabé                                                                                           | Community                   | rural                | 15-45                               | 15-45 | 422                  | 242  | 159               | 94   |      |
| Mali                  | 1999-2000   | Bafoulabe Iodine Study                                                                                                                    | Community                   | rural                | 15-45                               |       | 271                  |      | 104               |      |      |
| Mali                  | 2001        | DHS                                                                                                                                       | National                    | both                 | 15-49                               |       | 6786                 |      | 2102              |      |      |
| Mali                  | 2006        | DHS                                                                                                                                       | National                    | both                 | 15-49                               |       | 8211                 |      | 2734              |      |      |
| Mali                  | 2007        | STEPS                                                                                                                                     | Subnational                 | both                 | 15-64                               | 15-64 | 785                  | 538  | 299               | 191  |      |
| Mali                  | 2012-2013   | DHS                                                                                                                                       | National                    | both                 | 15-49                               |       | 2948                 |      | 839               |      |      |
| Mali                  | 2013        | STEPS                                                                                                                                     | Subnational                 | both                 | 15-65                               | 15-65 | 412                  | 204  | 144               | 69   |      |
| Mali                  | 2013        | Santé Nutritionnelle à Assise Communautaire dans la région de Kayes (SNACK)                                                               | Subnational                 | rural                | 20-68                               |       | 2484                 |      |                   |      |      |
| Mali                  | 2018        | DHS                                                                                                                                       | National                    | both                 | 15-49                               |       | 2908                 |      | 924               |      |      |
| Mauritania            | 2000-2001   | DHS                                                                                                                                       | National                    | both                 | 15-49                               |       | 1432                 |      |                   |      |      |
| Mauritania            | 2006        | STEPS                                                                                                                                     | Community                   | urban                | 15-64                               | 15-64 | 505                  | 413  | 154               | 128  |      |
| Mauritania            | 2019-2021   | DHS                                                                                                                                       | National                    | both                 | 15-49                               |       | 4223                 |      | 1656              |      |      |
| Niger                 | 1998        | DHS                                                                                                                                       | National                    | both                 | 20-49                               |       | 1856                 |      |                   |      |      |
| Niger                 | 2006        | DHS                                                                                                                                       | National                    | both                 | 15-49                               |       | 2636                 |      | 850               |      |      |
| Niger                 | 2007        | STEPS                                                                                                                                     | National                    | both                 | 15-64                               | 15-64 | 539                  | 390  | 135               | 116  |      |
| Niger                 | 2012        | DHS                                                                                                                                       | National                    | both                 | 15-49                               |       | 2794                 |      | 775               |      |      |
| Nigeria               | 1999        | DHS                                                                                                                                       | National                    | both                 | 20-49                               |       | 1295                 |      |                   |      |      |
| Nigeria               | 2003        | DHS                                                                                                                                       | National                    | both                 | 15-49                               |       | 4456                 |      | 1576              |      |      |
| Nigeria               | 2006        | Senbanjo et al., West Afr J Med 30(6):425-31, 2011                                                                                        | Community                   | urban                | 5-19                                | 5-19  | 274                  | 296  | 274               | 296  |      |
| Nigeria               | 2008        | DHS                                                                                                                                       | National                    | both                 | 15-49                               |       | 18426                |      | 5850              |      |      |
| Nigeria               | 2009        | Community Health Plan - Kwara Central Survey                                                                                              | Community                   | rural                | 5+                                  | 5+    | 1301                 | 1334 | 1004              | 1096 |      |
| Nigeria               | 2011        | Community Health Plan - Kwara Central Survey                                                                                              | Community                   | rural                | 5+                                  | 5+    | 491                  | 504  | 386               | 436  |      |
| Nigeria               | 2013        | DHS                                                                                                                                       | National                    | both                 | 15-49                               |       | 21338                |      | 7206              |      |      |
| Nigeria               | 2013        | Community Health Plan - Kwara Central Survey                                                                                              | Community                   | rural                | 5+                                  | 5+    | 416                  | 453  | 355               | 394  |      |
| Nigeria               | 2018        | Hypertension Prevalence, Awareness, Treatment and Control in Rural Area, Nigeria                                                          | Community                   | rural                | 18+                                 | 18+   | 64                   | 72   | 20                | 11   |      |
| Nigeria               | 2017-2019   | Removing the Mask on Hypertension (REMAH)                                                                                                 | National                    | both                 | 18+                                 | 18+   | 492                  | 427  | 67                | 59   |      |
| Sao Tome and Principe | 2008-2009   | DHS                                                                                                                                       | National                    | both                 | 15-49                               | 15-59 | 1448                 | 1150 | 465               | 455  |      |
| Sao Tome and Principe | 2009        | STEPS                                                                                                                                     | National                    | both                 | 25-64                               | 25-64 | 339                  | 284  |                   |      |      |
| Sao Tome and Principe | 2019        | STEPS                                                                                                                                     | National                    | both                 | 18-69                               | 18-69 | 409                  | 320  | 72                | 47   |      |
| Senegal               | 2003        | Perceptions of healthy and desirable body size in urban Senegalese women                                                                  | Community                   | urban                | 20-50                               |       | 117                  |      |                   |      |      |
| Senegal               | 2005        | DHS                                                                                                                                       | National                    | both                 | 15-49                               |       | 2810                 |      | 1107              |      |      |
| Senegal               | 2010-2011   | DHS                                                                                                                                       | National                    | both                 | 15-49                               | 15-59 | 3594                 | 2671 | 1351              | 1217 |      |
| Senegal               | 2010-2012   | Biocultural determinants of overweight and obesity in the context of nutrition transition in Senegal: a holistic anthropological approach | Subnational                 | both                 | 18+                                 | 18+   | 124                  | 109  | 34                | 15   |      |
| Senegal               | 2015        | Les maladies chroniques au Sénégal: Une écologie de la santé comparative entre Dakar et Widou Thiengoly                                   | Community                   | both                 | 20+                                 | 20+   | 320                  | 306  |                   |      |      |
| Senegal               | 2015        | STEPS                                                                                                                                     | National                    | both                 | 18-70                               | 18-70 | 1135                 | 613  |                   |      |      |
| Sierra Leone          | 2008        | DHS                                                                                                                                       | National                    | both                 | 15-49                               |       | 2007                 |      | 543               |      |      |
| Sierra Leone          | 2009        | STEPS                                                                                                                                     | National                    | both                 | 25-64                               | 25-64 | 814                  | 430  |                   |      |      |
| Sierra Leone          | 2013        | DHS                                                                                                                                       | National                    | both                 | 15-49                               | 15-59 | 4529                 | 3409 | 1744              | 1449 |      |
| Sierra Leone          | 2019        | DHS                                                                                                                                       | National                    | both                 | 15-49                               | 15-59 | 4144                 | 3074 | 1544              | 1406 |      |
| Togo                  | 1998        | DHS                                                                                                                                       | National                    | both                 | 20-49                               |       | 1779                 |      |                   |      |      |
| Togo                  | 2010        | STEPS                                                                                                                                     | National                    | both                 | 15-64                               | 15-64 | 1001                 | 841  | 248               | 245  |      |
| Togo                  | 2013-2014   | DHS                                                                                                                                       | National                    | both                 | 15-49                               |       | 2566                 |      | 869               |      |      |
| Togo                  | 2014        | Impact evaluation of a cash transfer program in North Togo                                                                                | Subnational                 | rural                | 20-65                               |       | 1959                 |      |                   |      |      |

\*As described in Methods section, participants aged 5-19 years were used in the BMI analysis and participants aged 5-29 years were used in the height analysis.

1. National studies for the 3 years prior to 1990 were assigned to 1990 in the BMI analysis so that they can inform the estimates in countries with slightly earlier national data.

2. This research uses data from China Health and Nutrition Survey (CHNS). We thank the National Institute of Nutrition and Food Safety, China Center for Disease Control and Prevention, Carolina Population Center (5 R24 HD050924), the University of North Carolina at Chapel Hill, the NIH (R01-HD30880, DK056350, R24-HD050924, and R01-HD38700) and the Fogarty International Center, NIH for financial support for the CHNS data collection and analysis files from 1989 to 2011 and future surveys, and the China-Japan Friendship Hospital, Ministry of Health for support for CHNS 2009.

3. This research uses data from Australia Health Survey (AHS). We thank the Health Section, Australian Bureau of Statistics, Belconnen, ACT, Australia for support for AHS 2011-2012.

4. Accessed via the Irish Social Science Data Archive - [www.ucd.ie/issda](http://www.ucd.ie/issda)

5. This research uses data from Add Health, a program project designed by J. Richard Udry, Peter S. Bearman, and Kathleen Mullan Harris, and funded by a grant P01-HD31921 from the Eunice Kennedy Shriver National Institute of Child Health and Human Development, with cooperative funding from 17 other agencies. Special acknowledgment is due Ronald R. Rindfuss and Barbara Entwisle for assistance in the original design. Persons interested in obtaining data files from Add Health should contact Add Health, Carolina Population Center, 123 W. Franklin Street, Chapel Hill, NC 27516-2524 ([addhealth@unc.edu](mailto:addhealth@unc.edu)). No direct support was received from grant P01-HD31921 for this analysis.

6. Due to the COVID-19 pandemic the NHANES 2019-2020 cycle was not completed. As a result the data are not nationally representative and considered subnational.

7. The Swiss BMI Monitoring Study was supported by the Health Service of the town of Berne, Basel Health Service for Children and Adolescents, and the School-Medical Service of the town of Zurich.

8. Data used for this research was provided by the INMA – Infancia y Medio Ambiente [Environment and Childhood] Project ([www.proyectoima.org](http://www.proyectoima.org)), which is supported in part by funds. This study was funded by grants from Instituto de Salud Carlos III (Red INMA G03/176 and CB06/02/0041), Spanish Ministry of Health (FIS-97/1102, FIS-07/0252, FIS-PS09/00362, 97/0588, 00/0021-2, PI061756, PS0901958, PI14/00677 incl. FEDER funds, FIS-PS09/00090, PI041436, FIS-PI042018, FIS-PI06/0867, PI081151 incl. FEDER funds, FIS-PI09/02311 and FIS-PI13/02187, and FIS-FEDER 03/1615, 04/1509, 04/1112, 04/1931, 05/1079, 05/1052, 06/1213, 07/0314, 09/02647, 11/01007, 11/0178, 11/02591, 11/02038, PI12/01890 incl. FEDER funds, 13/1944, 13/2032, FIS-PI13/02429, 14/0891, 14/1687 and CP13/00054 incl. FEDER funds), Spanish Ministry of Economy and Competitiveness (SAF2012-32991 incl. FEDER funds), CIBERESP, Generalitat de Catalunya-CIRIT 1999SGR 00241, Generalitat de Catalunya-AGAUR (2009 SGR 501, 2014 SGR 822), the Conselleria de Sanitat Generalitat Valenciana, Department of Health of the Basque Government (2005111093, 2009111069 and 2013111089), the Provincial Government of Gipuzkoa (DFG06/004 and DFG08/001), Fundació La Caixa (97/009-00 and 00/077-00), Beca de la IV convocatòria de Ayudas a la Investigación en Enfermedades Neurodegenerativas de La Caixa, Fundació La marató de TV3 (090430), Obra Social Cajastur/Fundación Liberbank, Universidad de Oviedo, the EU Commission (QLK4-1999-01422, QLK4-CT-2000-00263, QLK4-2002-00603, CONTAMED FP7-ENV-212502, FP7-ENV-2011 cod 282957, HEALTH.2010.2.4.5-1, 261357, 308333, 603794), Agence Nationale de Securite Sanitaire de l'Alimentation de l'Environnement et du Travail (1262C0010), Consejería de Salud de la Junta de Andalucía (grant number 183/07) and Annual agreements with municipalities in the study area (Zumarraga, Urretxu, Legazpi, Azkoitia y Azpeitia y Beasain).

9. Dr Take Naseri (Ministry of Health, Samoa), and Muagututia Sefuiva Reupena (Lutia I Puava Ae Mapu I Fagalele) contributed to the GWAS studies in Samoa.

10. The bibliographic citation for this data source is: Desai, Sonalde, Vanneman, Reeve, and National Council of Applied Economic Research, New Delhi. India Human Development Survey (IHDS), 2005. Inter-university Consortium for Political and Social Research [distributor], 2018-08-08. <https://doi.org/10.3886/ICPSR22626.v12>

11. The bibliographic citation for this data source is: Desai, Sonalde, Reeve Vanneman and National Council of Applied Economic Research. India Human Development Survey-II (IHDS-II), 2011-12. Inter-university Consortium for Political and Social Research [distributor], 2018-08-08. <https://doi.org/10.3886/ICPSR36151.v6>



**Supplementary Table 3.** Urban and rural mean height and urban-rural difference in mean height in 1990 and 2020 by sex, age-standardised and at ages 5, 10, 15 and 19 years.

| Girls                             | Mean height in 1990 (cm) |                      |                      |                      |                      | Mean height in 2020 (cm) |                      |                      |                      |                      |
|-----------------------------------|--------------------------|----------------------|----------------------|----------------------|----------------------|--------------------------|----------------------|----------------------|----------------------|----------------------|
|                                   | Age-standardised         | 5 years              | 10 years             | 15 years             | 19 years             | Age-standardised         | 5 years              | 10 years             | 15 years             | 19 years             |
| <b>Central and eastern Europe</b> |                          |                      |                      |                      |                      |                          |                      |                      |                      |                      |
| <i>Central Europe</i>             |                          |                      |                      |                      |                      |                          |                      |                      |                      |                      |
| Albania                           |                          |                      |                      |                      |                      |                          |                      |                      |                      |                      |
| rural                             | 143.8 (141.5, 146.2)     | 113.2 (110.4, 115.9) | 138.5 (136.1, 140.9) | 158.9 (156.1, 161.8) | 160.7 (157.2, 164.2) | 145.8 (144.5, 147.1)     | 116.4 (114.1, 118.6) | 140.9 (139.4, 142.4) | 160.3 (159.1, 161.6) | 161.4 (160.0, 163.0) |
| urban                             | 146.1 (143.7, 148.5)     | 115.6 (112.8, 118.3) | 140.9 (138.5, 143.2) | 161.2 (158.3, 164.0) | 162.9 (159.3, 166.5) | 147.1 (145.8, 148.3)     | 117.8 (115.6, 120.0) | 142.2 (140.7, 143.7) | 161.5 (160.3, 162.7) | 162.6 (161.1, 164.1) |
| urban-rural difference            | 2.3 (1.4, 3.3)           | 2.4 (1.3, 3.6)       | 2.4 (1.4, 3.3)       | 2.3 (1.3, 3.2)       | 2.2 (1.1, 3.3)       | 1.3 (0.6, 1.9)           | 1.4 (0.4, 2.4)       | 1.3 (0.6, 2.0)       | 1.2 (0.5, 1.9)       | 1.1 (0.3, 2.0)       |
| Bosnia and Herzegovina            |                          |                      |                      |                      |                      |                          |                      |                      |                      |                      |
| rural                             | 148.8 (145.4, 152.2)     | 116.0 (110.8, 121.2) | 143.5 (139.5, 147.6) | 164.5 (161.2, 167.8) | 167.0 (163.7, 170.2) | 150.0 (146.4, 153.7)     | 118.0 (111.8, 124.1) | 145.0 (140.6, 149.3) | 165.3 (162.0, 168.7) | 167.3 (164.3, 170.3) |
| urban                             | 150.2 (146.9, 153.7)     | 117.5 (112.3, 122.7) | 144.9 (140.9, 149.0) | 165.9 (162.6, 169.2) | 168.3 (165.0, 171.6) | 150.4 (146.7, 154.1)     | 118.4 (112.3, 124.5) | 145.3 (141.0, 149.7) | 165.6 (162.3, 169.0) | 167.6 (164.7, 170.5) |
| urban-rural difference            | 1.4 (0.1, 2.7)           | 1.5 (-0.1, 3.1)      | 1.5 (0.1, 2.8)       | 1.4 (0.0, 2.7)       | 1.3 (-0.2, 2.8)      | 0.3 (-0.9, 1.6)          | 0.4 (-1.2, 2.0)      | 0.4 (-1.0, 1.7)      | 0.3 (-1.0, 1.5)      | 0.3 (-1.1, 1.6)      |
| Bulgaria                          |                          |                      |                      |                      |                      |                          |                      |                      |                      |                      |
| rural                             | 145.5 (143.5, 147.6)     | 115.0 (112.9, 117.2) | 140.6 (138.6, 142.5) | 160.3 (157.8, 162.8) | 161.8 (158.3, 165.4) | 146.3 (144.9, 147.6)     | 116.4 (114.4, 118.4) | 141.5 (140.0, 143.0) | 160.8 (159.0, 162.6) | 162.2 (159.9, 164.5) |
| urban                             | 148.1 (146.3, 149.9)     | 117.8 (115.9, 119.8) | 143.2 (141.5, 145.0) | 162.8 (160.5, 165.1) | 164.1 (160.8, 167.5) | 147.8 (146.6, 149.1)     | 118.2 (116.3, 120.1) | 143.1 (141.7, 144.5) | 162.2 (160.6, 163.9) | 163.5 (161.3, 165.6) |
| urban-rural difference            | 2.5 (1.4, 3.7)           | 2.8 (1.6, 4.0)       | 2.6 (1.5, 3.7)       | 2.4 (1.2, 3.7)       | 2.3 (0.7, 3.8)       | 1.5 (0.6, 2.5)           | 1.8 (0.7, 2.9)       | 1.6 (0.6, 2.5)       | 1.4 (0.3, 2.5)       | 1.3 (-0.1, 2.7)      |
| Croatia                           |                          |                      |                      |                      |                      |                          |                      |                      |                      |                      |
| rural                             | 150.0 (148.2, 151.8)     | 117.5 (115.3, 119.7) | 145.1 (143.3, 147.1) | 165.5 (163.4, 167.7) | 166.6 (164.0, 169.2) | 150.3 (149.2, 151.4)     | 118.3 (116.4, 120.1) | 145.7 (144.4, 147.0) | 165.7 (164.3, 167.1) | 166.4 (164.8, 168.2) |
| urban                             | 151.4 (149.6, 153.2)     | 118.6 (116.4, 120.8) | 146.5 (144.7, 148.4) | 167.1 (165.0, 169.3) | 168.4 (165.8, 171.0) | 150.7 (149.7, 151.8)     | 118.3 (116.5, 120.2) | 146.0 (144.8, 147.2) | 166.2 (164.9, 167.6) | 167.2 (165.6, 168.9) |
| urban-rural difference            | 1.5 (0.6, 2.3)           | 1.1 (0.1, 2.1)       | 1.4 (0.5, 2.2)       | 1.6 (0.7, 2.5)       | 1.8 (0.8, 2.9)       | 0.4 (-0.3, 1.1)          | 0.0 (-0.8, 0.9)      | 0.3 (-0.4, 1.0)      | 0.5 (-0.2, 1.3)      | 0.7 (-0.2, 1.7)      |
| Czechia                           |                          |                      |                      |                      |                      |                          |                      |                      |                      |                      |
| rural                             | 147.8 (146.7, 148.9)     | 114.3 (112.9, 115.8) | 142.2 (140.8, 143.6) | 163.8 (162.5, 165.2) | 166.7 (165.3, 168.2) | 149.6 (148.5, 150.7)     | 117.1 (115.4, 118.8) | 144.3 (143.0, 145.5) | 165.2 (163.7, 166.7) | 167.6 (166.1, 169.2) |
| urban                             | 148.7 (147.8, 149.7)     | 115.2 (113.9, 116.5) | 143.1 (141.9, 144.3) | 164.8 (163.6, 166.0) | 167.7 (166.3, 169.1) | 149.5 (148.4, 150.5)     | 116.9 (115.2, 118.6) | 144.1 (142.9, 145.3) | 165.1 (163.6, 166.5) | 167.5 (166.0, 169.0) |
| urban-rural difference            | 0.9 (0.0, 1.8)           | 0.9 (-0.2, 1.9)      | 0.9 (0.0, 1.8)       | 0.9 (-0.1, 1.9)      | 1.0 (-0.2, 2.2)      | -0.1 (-0.9, 0.7)         | -0.2 (-1.1, 0.7)     | -0.2 (-0.9, 0.6)     | -0.1 (-1.0, 0.8)     | -0.1 (-1.2, 1.1)     |
| Hungary                           |                          |                      |                      |                      |                      |                          |                      |                      |                      |                      |
| rural                             | 145.9 (143.1, 148.6)     | 113.5 (110.7, 116.2) | 142.0 (139.4, 144.6) | 160.5 (157.1, 163.9) | 161.6 (157.3, 166.0) | 148.8 (148.0, 149.6)     | 118.6 (116.8, 120.4) | 145.8 (144.9, 146.7) | 162.4 (161.4, 163.3) | 162.3 (161.0, 163.6) |
| urban                             | 148.5 (145.7, 151.2)     | 115.4 (112.8, 118.1) | 144.5 (141.9, 147.0) | 163.4 (160.0, 166.7) | 164.9 (160.5, 169.1) | 150.3 (149.6, 151.1)     | 119.4 (117.7, 121.2) | 147.1 (146.2, 147.9) | 164.2 (163.4, 165.0) | 164.4 (163.3, 165.5) |
| urban-rural difference            | 2.6 (1.6, 3.6)           | 2.0 (0.8, 3.1)       | 2.4 (1.5, 3.4)       | 2.9 (1.8, 3.9)       | 3.2 (1.9, 4.5)       | 1.5 (1.0, 2.0)           | 0.9 (0.0, 1.7)       | 1.3 (0.8, 1.8)       | 1.8 (1.1, 2.5)       | 2.1 (1.2, 3.1)       |
| North Macedonia                   |                          |                      |                      |                      |                      |                          |                      |                      |                      |                      |
| rural                             | 143.6 (141.5, 145.7)     | 113.3 (110.6, 116.2) | 138.7 (136.3, 141.2) | 158.3 (155.8, 160.7) | 159.6 (157.0, 162.3) | 145.6 (144.1, 147.1)     | 117.0 (114.6, 119.2) | 141.3 (139.7, 142.9) | 159.5 (157.2, 161.7) | 159.8 (157.0, 162.9) |
| urban                             | 145.6 (143.5, 147.7)     | 115.4 (112.6, 118.2) | 140.8 (138.3, 143.3) | 160.3 (157.8, 162.7) | 161.6 (159.0, 164.2) | 146.5 (145.0, 148.0)     | 117.9 (115.6, 120.2) | 142.2 (140.6, 143.8) | 160.4 (158.1, 162.6) | 160.7 (157.9, 163.8) |
| urban-rural difference            | 2.0 (0.8, 3.2)           | 2.0 (0.9, 3.2)       | 2.0 (0.9, 3.1)       | 2.0 (0.6, 3.4)       | 2.0 (0.3, 3.7)       | 0.9 (0.0, 1.8)           | 1.0 (0.0, 1.9)       | 0.9 (0.1, 1.8)       | 0.9 (-0.3, 2.1)      | 0.9 (-0.5, 2.3)      |
| Montenegro                        |                          |                      |                      |                      |                      |                          |                      |                      |                      |                      |
| rural                             | 148.9 (145.9, 151.9)     | 116.3 (112.9, 119.8) | 143.1 (140.1, 146.0) | 164.7 (161.2, 168.3) | 167.9 (163.4, 172.6) | 150.9 (149.9, 151.8)     | 118.6 (117.0, 120.2) | 145.1 (144.1, 146.2) | 166.5 (165.3, 167.8) | 169.5 (167.7, 171.4) |
| urban                             | 150.8 (147.9, 153.8)     | 118.2 (114.9, 121.7) | 145.0 (142.1, 147.9) | 166.7 (163.2, 170.1) | 169.9 (165.4, 174.5) | 151.7 (150.8, 152.6)     | 119.4 (117.9, 120.9) | 146.0 (144.9, 147.0) | 167.4 (166.1, 168.6) | 170.4 (168.6, 172.2) |
| urban-rural difference            | 1.9 (0.8, 3.0)           | 1.9 (0.8, 3.1)       | 1.9 (0.9, 3.0)       | 1.9 (0.7, 3.1)       | 1.9 (0.4, 3.4)       | 0.8 (0.1, 1.6)           | 0.9 (0.0, 1.7)       | 0.8 (0.1, 1.6)       | 0.8 (-0.1, 1.7)      | 0.8 (-0.4, 2.0)      |
| Poland                            |                          |                      |                      |                      |                      |                          |                      |                      |                      |                      |
| rural                             | 145.9 (144.7, 147.1)     | 112.6 (111.1, 114.1) | 141.0 (139.7, 142.2) | 161.5 (160.2, 162.8) | 163.7 (162.4, 164.9) | 147.3 (146.4, 148.2)     | 112.8 (111.5, 114.2) | 142.2 (141.2, 143.2) | 163.4 (162.5, 164.3) | 166.0 (164.9, 167.1) |
| urban                             | 146.9 (145.7, 148.1)     | 113.6 (112.1, 115.1) | 142.0 (140.8, 143.2) | 162.5 (161.2, 163.7) | 164.6 (163.3, 165.8) | 147.1 (146.3, 148.0)     | 112.7 (111.5, 114.0) | 142.0 (141.1, 142.9) | 163.1 (162.3, 164.0) | 165.7 (164.6, 166.9) |
| urban-rural difference            | 1.0 (0.3, 1.7)           | 1.1 (0.2, 1.9)       | 1.0 (0.3, 1.7)       | 0.9 (0.3, 1.6)       | 0.9 (0.1, 1.7)       | -0.2 (-0.8, 0.4)         | -0.1 (-0.9, 0.7)     | -0.2 (-0.8, 0.4)     | -0.2 (-0.8, 0.4)     | -0.3 (-1.0, 0.4)     |
| Romania                           |                          |                      |                      |                      |                      |                          |                      |                      |                      |                      |
| rural                             | 144.8 (142.9, 146.7)     | 110.3 (108.4, 112.1) | 139.5 (137.6, 141.3) | 160.9 (158.6, 163.1) | 164.2 (161.2, 167.1) | 146.0 (145.1, 147.0)     | 112.7 (111.1, 114.2) | 141.2 (140.2, 142.2) | 161.5 (160.4, 162.6) | 163.8 (162.2, 165.3) |
| urban                             | 147.7 (145.7, 149.6)     | 113.1 (111.3, 115.0) | 142.3 (140.5, 144.1) | 163.7 (161.4, 166.0) | 167.0 (164.0, 170.0) | 147.7 (146.8, 148.6)     | 114.3 (112.9, 115.8) | 142.9 (141.9, 143.8) | 163.2 (162.1, 164.2) | 165.5 (164.0, 166.9) |
| urban-rural difference            | 2.8 (2.1, 3.6)           | 2.8 (1.9, 3.7)       | 2.8 (2.1, 3.6)       | 2.8 (2.0, 3.7)       | 2.8 (1.9, 3.8)       | 1.7 (1.0, 2.3)           | 1.7 (0.9, 2.4)       | 1.7 (1.0, 2.3)       | 1.7 (1.0, 2.4)       | 1.7 (0.8, 2.6)       |
| Serbia                            |                          |                      |                      |                      |                      |                          |                      |                      |                      |                      |
| rural                             | 148.2 (146.6, 149.9)     | 115.5 (113.1, 117.9) | 143.1 (141.3, 144.9) | 164.0 (162.1, 165.9) | 165.4 (163.4, 167.5) | 150.3 (149.2, 151.4)     | 117.5 (115.4, 119.7) | 145.2 (144.0, 146.5) | 166.1 (164.7, 167.4) | 167.6 (165.9, 169.2) |
| urban                             | 149.9 (148.3, 151.6)     | 117.1 (114.8, 119.4) | 144.8 (143.1, 146.5) | 165.8 (163.8, 167.7) | 167.3 (165.2, 169.3) | 150.9 (149.8, 152.0)     | 118.0 (115.9, 120.1) | 145.8 (144.5, 147.0) | 166.7 (165.4, 168.0) | 168.3 (166.7, 169.9) |
| urban-rural difference            | 1.7 (0.9, 2.5)           | 1.6 (0.6, 2.6)       | 1.7 (0.8, 2.5)       | 1.7 (0.9, 2.5)       | 1.8 (0.9, 2.8)       | 0.6 (-0.1, 1.3)          | 0.5 (-0.4, 1.4)      | 0.5 (-0.2, 1.3)      | 0.6 (-0.1, 1.3)      | 0.7 (-0.2, 1.6)      |
| Slovakia                          |                          |                      |                      |                      |                      |                          |                      |                      |                      |                      |
| rural                             | 147.5 (146.3, 148.8)     | 114.6 (113.0, 116.2) | 142.3 (140.9, 143.7) | 163.4 (161.8, 164.9) | 165.3 (163.4, 167.1) | 149.7 (148.5, 151.0)     | 117.2 (115.0, 119.3) | 144.7 (143.3, 146.0) | 165.3 (164.0, 166.7) | 166.9 (165.2, 168.6) |
| urban                             | 149.1 (147.9, 150.4)     | 116.0 (114.4, 117.6) | 143.8 (142.5, 145.2) | 165.0 (163.5, 166.6) | 167.0 (165.2, 168.9) | 150.3 (149.1, 151.4)     | 117.6 (115.3, 119.8) | 145.2 (143.9, 146.5) | 165.9 (164.6, 167.3) | 167.6 (166.0, 169.2) |
| urban-rural difference            | 1.6 (0.7, 2.4)           | 1.4 (0.5, 2.4)       | 1.5 (0.7, 2.4)       | 1.7 (0.7, 2.6)       | 1.8 (0.6, 2.9)       | 0.5 (-0.3, 1.4)          | 0.4 (-0.6, 1.3)      | 0.5 (-0.3, 1.3)      | 0.6 (-0.3, 1.6)      | 0.7 (-0.5, 1.9)      |
| Slovenia                          |                          |                      |                      |                      |                      |                          |                      |                      |                      |                      |

| Girls                                             | Mean height in 1990 (cm) |                      |                      |                      |                      | Mean height in 2020 (cm) |                      |                      |                      |                      |
|---------------------------------------------------|--------------------------|----------------------|----------------------|----------------------|----------------------|--------------------------|----------------------|----------------------|----------------------|----------------------|
|                                                   | Age-standardised         | 5 years              | 10 years             | 15 years             | 19 years             | Age-standardised         | 5 years              | 10 years             | 15 years             | 19 years             |
| rural                                             | 148.3 (147.8, 148.8)     | 116.6 (115.8, 117.4) | 143.2 (142.6, 143.8) | 163.9 (163.3, 164.5) | 164.8 (164.0, 165.6) | 150.6 (149.9, 151.4)     | 118.1 (116.8, 119.5) | 145.5 (144.7, 146.3) | 166.5 (165.8, 167.2) | 167.5 (166.6, 168.3) |
| urban                                             | 149.0 (148.5, 149.5)     | 117.2 (116.4, 117.9) | 143.8 (143.3, 144.4) | 164.6 (164.0, 165.2) | 165.5 (164.8, 166.3) | 150.2 (149.6, 150.9)     | 117.6 (116.3, 118.9) | 145.1 (144.3, 145.8) | 166.1 (165.4, 166.8) | 167.1 (166.3, 167.9) |
| urban-rural difference                            | 0.7 (-0.1, 1.4)          | 0.6 (-0.3, 1.5)      | 0.6 (-0.1, 1.3)      | 0.7 (-0.2, 1.6)      | 0.7 (-0.4, 1.9)      | -0.4 (-1.2, 0.4)         | -0.5 (-1.5, 0.5)     | -0.4 (-1.2, 0.3)     | -0.4 (-1.2, 0.5)     | -0.4 (-1.4, 0.8)     |
| <b>Eastern Europe</b>                             |                          |                      |                      |                      |                      |                          |                      |                      |                      |                      |
| <b>Belarus</b>                                    |                          |                      |                      |                      |                      |                          |                      |                      |                      |                      |
| rural                                             | 145.7 (141.6, 149.8)     | 111.3 (105.7, 117.0) | 139.1 (134.7, 143.7) | 162.6 (158.4, 167.0) | 165.2 (160.6, 170.0) | 148.2 (144.5, 152.1)     | 114.7 (108.5, 121.3) | 142.0 (137.5, 146.6) | 164.8 (161.5, 168.1) | 166.8 (164.4, 169.1) |
| urban                                             | 147.5 (143.6, 151.6)     | 113.2 (107.6, 118.9) | 140.9 (136.6, 145.5) | 164.5 (160.3, 168.8) | 167.0 (162.4, 171.7) | 149.2 (145.4, 153.0)     | 115.6 (109.3, 122.1) | 142.9 (138.4, 147.6) | 165.7 (162.4, 169.1) | 167.7 (165.3, 170.0) |
| urban-rural difference                            | 1.9 (0.4, 3.3)           | 1.8 (0.1, 3.5)       | 1.9 (0.4, 3.3)       | 1.9 (0.4, 3.3)       | 1.9 (0.2, 3.6)       | 0.9 (-0.4, 2.2)          | 0.9 (-0.7, 2.5)      | 0.9 (-0.4, 2.3)      | 0.9 (-0.4, 2.2)      | 0.9 (-0.5, 2.4)      |
| <b>Estonia</b>                                    |                          |                      |                      |                      |                      |                          |                      |                      |                      |                      |
| rural                                             | 147.7 (145.9, 149.5)     | 112.6 (109.8, 115.4) | 141.5 (139.3, 143.6) | 164.8 (162.9, 166.7) | 166.8 (165.0, 168.7) | 150.8 (149.7, 152.0)     | 116.2 (114.3, 118.2) | 144.9 (143.6, 146.2) | 167.6 (166.2, 168.9) | 168.9 (167.4, 170.6) |
| urban                                             | 148.5 (146.7, 150.2)     | 113.5 (110.8, 116.2) | 142.3 (140.2, 144.4) | 165.5 (163.6, 167.4) | 167.4 (165.6, 169.2) | 150.7 (149.5, 151.8)     | 116.3 (114.4, 118.2) | 144.8 (143.5, 146.1) | 167.4 (166.0, 168.8) | 168.7 (167.1, 170.2) |
| urban-rural difference                            | 0.8 (-0.1, 1.7)          | 1.0 (-0.2, 2.2)      | 0.8 (-0.1, 1.8)      | 0.7 (-0.2, 1.6)      | 0.6 (-0.3, 1.6)      | -0.1 (-0.8, 0.6)         | 0.1 (-0.9, 1.0)      | -0.1 (-0.8, 0.7)     | -0.2 (-0.9, 0.5)     | -0.3 (-1.1, 0.5)     |
| <b>Latvia</b>                                     |                          |                      |                      |                      |                      |                          |                      |                      |                      |                      |
| rural                                             | 147.4 (145.0, 149.7)     | 112.4 (109.5, 115.3) | 140.5 (138.0, 143.1) | 164.6 (161.7, 167.5) | 167.6 (164.4, 170.8) | 150.2 (148.8, 151.7)     | 116.4 (114.2, 118.5) | 143.8 (142.4, 145.3) | 166.9 (164.9, 169.0) | 169.2 (166.3, 172.2) |
| urban                                             | 149.0 (146.7, 151.4)     | 114.1 (111.3, 117.0) | 142.2 (139.7, 144.8) | 166.2 (163.3, 169.2) | 169.2 (166.0, 172.5) | 150.9 (149.5, 152.3)     | 117.1 (115.0, 119.2) | 144.6 (143.2, 146.0) | 167.6 (165.6, 169.6) | 169.8 (166.9, 172.9) |
| urban-rural difference                            | 1.7 (0.6, 2.8)           | 1.7 (0.6, 2.8)       | 1.7 (0.6, 2.8)       | 1.6 (0.4, 2.9)       | 1.6 (0.1, 3.2)       | 0.7 (-0.1, 1.5)          | 0.8 (-0.1, 1.6)      | 0.7 (0.0, 1.5)       | 0.7 (-0.3, 1.7)      | 0.7 (-0.7, 2.0)      |
| <b>Lithuania</b>                                  |                          |                      |                      |                      |                      |                          |                      |                      |                      |                      |
| rural                                             | 147.4 (145.3, 149.5)     | 114.7 (111.7, 117.7) | 141.1 (138.7, 143.5) | 163.8 (161.3, 166.2) | 165.5 (163.2, 167.8) | 149.7 (148.4, 151.1)     | 117.8 (115.4, 120.2) | 143.7 (142.3, 145.2) | 165.8 (163.9, 167.6) | 167.0 (164.5, 169.7) |
| urban                                             | 148.9 (146.9, 151.0)     | 116.5 (113.6, 119.6) | 142.7 (140.3, 145.1) | 165.2 (162.7, 167.8) | 166.8 (164.4, 169.3) | 150.4 (149.0, 151.8)     | 118.7 (116.3, 121.1) | 144.5 (143.0, 145.9) | 166.3 (164.5, 168.2) | 167.5 (165.0, 170.2) |
| urban-rural difference                            | 1.6 (0.5, 2.6)           | 1.8 (0.7, 2.9)       | 1.6 (0.6, 2.6)       | 1.5 (0.3, 2.6)       | 1.4 (-0.1, 2.8)      | 0.7 (-0.1, 1.5)          | 0.9 (0.0, 1.8)       | 0.7 (0.0, 1.5)       | 0.6 (-0.4, 1.5)      | 0.5 (-0.7, 1.7)      |
| <b>Moldova</b>                                    |                          |                      |                      |                      |                      |                          |                      |                      |                      |                      |
| rural                                             | 143.5 (141.2, 145.8)     | 110.2 (106.7, 113.7) | 137.2 (134.7, 139.6) | 160.2 (157.4, 163.0) | 161.7 (158.5, 164.9) | 146.1 (144.1, 148.0)     | 113.9 (110.3, 117.5) | 140.2 (137.9, 142.5) | 162.2 (160.1, 164.1) | 163.0 (161.1, 164.9) |
| urban                                             | 145.3 (143.0, 147.5)     | 111.9 (108.5, 115.4) | 139.0 (136.5, 141.4) | 161.9 (159.2, 164.6) | 163.5 (160.4, 166.6) | 146.9 (144.9, 148.8)     | 114.8 (111.2, 118.4) | 141.1 (138.7, 143.3) | 163.0 (161.0, 164.9) | 163.9 (162.0, 165.7) |
| urban-rural difference                            | 1.8 (0.7, 2.8)           | 1.8 (0.5, 3.1)       | 1.8 (0.7, 2.8)       | 1.8 (0.7, 2.8)       | 1.8 (0.6, 2.9)       | 0.8 (-0.1, 1.8)          | 0.8 (-0.5, 2.1)      | 0.8 (-0.2, 1.9)      | 0.8 (-0.1, 1.8)      | 0.9 (-0.2, 1.9)      |
| <b>Russian Federation</b>                         |                          |                      |                      |                      |                      |                          |                      |                      |                      |                      |
| rural                                             | 142.4 (141.6, 143.1)     | 107.3 (106.3, 108.4) | 135.7 (134.8, 136.5) | 159.5 (158.7, 160.4) | 162.5 (161.5, 163.5) | 146.6 (145.2, 148.0)     | 113.4 (111.4, 115.6) | 140.5 (138.9, 142.1) | 162.8 (161.4, 164.3) | 164.7 (163.2, 166.2) |
| urban                                             | 144.8 (144.1, 145.5)     | 110.2 (109.2, 111.2) | 138.2 (137.4, 139.0) | 161.7 (160.9, 162.6) | 164.4 (163.4, 165.4) | 148.1 (146.8, 149.4)     | 115.4 (113.5, 117.4) | 142.1 (140.7, 143.5) | 164.1 (162.8, 165.4) | 165.7 (164.4, 167.0) |
| urban-rural difference                            | 2.4 (2.0, 2.9)           | 2.9 (2.2, 3.6)       | 2.6 (2.1, 3.1)       | 2.2 (1.7, 2.7)       | 1.9 (1.4, 2.5)       | 1.5 (0.6, 2.3)           | 2.0 (1.0, 3.0)       | 1.6 (0.8, 2.5)       | 1.3 (0.4, 2.1)       | 1.0 (0.1, 1.9)       |
| <b>Ukraine</b>                                    |                          |                      |                      |                      |                      |                          |                      |                      |                      |                      |
| rural                                             | 144.8 (142.0, 147.7)     | 110.5 (107.3, 113.7) | 138.2 (135.5, 141.0) | 162.0 (158.7, 165.3) | 164.1 (159.9, 168.6) | 147.5 (146.4, 148.6)     | 114.3 (112.3, 116.2) | 141.3 (140.1, 142.4) | 164.1 (163.0, 165.2) | 165.6 (164.2, 167.2) |
| urban                                             | 146.4 (143.5, 149.2)     | 111.7 (108.5, 114.8) | 139.6 (136.9, 142.4) | 163.7 (160.5, 167.0) | 166.1 (161.9, 170.4) | 148.0 (147.0, 149.1)     | 114.4 (112.4, 116.3) | 141.7 (140.5, 142.8) | 164.8 (163.7, 165.9) | 166.5 (165.2, 168.0) |
| urban-rural difference                            | 1.6 (0.4, 2.7)           | 1.2 (-0.1, 2.4)      | 1.4 (0.3, 2.6)       | 1.7 (0.5, 3.0)       | 2.0 (0.6, 3.4)       | 0.5 (-0.1, 1.2)          | 0.1 (-0.8, 1.1)      | 0.4 (-0.3, 1.1)      | 0.7 (0.0, 1.4)       | 0.9 (0.0, 1.9)       |
| <b>Central Asia, Middle East and north Africa</b> |                          |                      |                      |                      |                      |                          |                      |                      |                      |                      |
| <b>Central Asia</b>                               |                          |                      |                      |                      |                      |                          |                      |                      |                      |                      |
| <b>Armenia</b>                                    |                          |                      |                      |                      |                      |                          |                      |                      |                      |                      |
| rural                                             | 139.2 (137.3, 141.0)     | 112.2 (107.9, 116.4) | 132.7 (130.3, 135.0) | 153.9 (152.2, 155.6) | 156.0 (154.3, 157.7) | 141.9 (140.6, 143.3)     | 114.4 (111.3, 117.6) | 135.3 (133.6, 137.0) | 156.9 (155.5, 158.5) | 159.3 (157.8, 160.9) |
| urban                                             | 141.7 (139.8, 143.6)     | 114.9 (110.6, 119.2) | 135.3 (133.0, 137.6) | 156.4 (154.7, 158.0) | 158.3 (156.7, 160.1) | 143.3 (141.9, 144.6)     | 115.9 (112.7, 119.1) | 136.7 (135.0, 138.3) | 158.2 (156.7, 159.7) | 160.5 (158.9, 162.0) |
| urban-rural difference                            | 2.6 (1.7, 3.5)           | 2.7 (1.4, 4.1)       | 2.6 (1.6, 3.6)       | 2.5 (1.7, 3.3)       | 2.4 (1.5, 3.3)       | 1.3 (0.5, 2.2)           | 1.5 (0.2, 2.8)       | 1.4 (0.5, 2.3)       | 1.3 (0.5, 2.0)       | 1.1 (0.3, 2.0)       |
| <b>Azerbaijan</b>                                 |                          |                      |                      |                      |                      |                          |                      |                      |                      |                      |
| rural                                             | 139.6 (137.4, 141.9)     | 111.4 (106.5, 116.3) | 133.0 (130.1, 135.7) | 154.9 (152.9, 156.9) | 157.2 (155.2, 159.1) | 142.7 (140.0, 145.4)     | 114.4 (108.6, 120.1) | 136.0 (132.8, 139.3) | 158.0 (156.0, 159.9) | 160.2 (158.4, 161.9) |
| urban                                             | 141.8 (139.5, 144.1)     | 114.0 (109.0, 119.0) | 135.2 (132.4, 138.0) | 156.9 (154.8, 159.0) | 158.9 (156.9, 160.9) | 143.6 (140.9, 146.3)     | 115.8 (110.0, 121.6) | 137.1 (133.8, 140.3) | 158.8 (156.8, 160.7) | 160.7 (159.0, 162.5) |
| urban-rural difference                            | 2.2 (1.1, 3.3)           | 2.6 (1.0, 4.2)       | 2.3 (1.1, 3.5)       | 2.0 (1.0, 3.0)       | 1.8 (0.7, 2.8)       | 1.0 (0.0, 1.9)           | 1.4 (-0.1, 2.9)      | 1.1 (0.0, 2.2)       | 0.8 (-0.1, 1.7)      | 0.5 (-0.4, 1.5)      |
| <b>Georgia</b>                                    |                          |                      |                      |                      |                      |                          |                      |                      |                      |                      |
| rural                                             | 141.6 (138.8, 144.4)     | 113.6 (109.4, 117.9) | 134.3 (131.2, 137.3) | 156.9 (153.6, 160.3) | 160.6 (156.5, 164.6) | 144.0 (142.6, 145.4)     | 116.3 (113.3, 119.2) | 136.8 (135.0, 138.5) | 159.2 (157.2, 161.3) | 162.8 (160.7, 164.9) |
| urban                                             | 144.1 (141.2, 146.9)     | 116.5 (112.2, 120.8) | 136.9 (133.8, 140.0) | 159.2 (155.9, 162.6) | 162.7 (158.7, 166.7) | 145.4 (144.0, 146.7)     | 118.1 (115.2, 121.1) | 138.2 (136.5, 139.9) | 160.4 (158.4, 162.4) | 163.7 (161.7, 165.8) |
| urban-rural difference                            | 2.5 (1.3, 3.7)           | 2.9 (1.5, 4.3)       | 2.6 (1.4, 3.9)       | 2.3 (1.1, 3.6)       | 2.1 (0.6, 3.5)       | 1.3 (0.4, 2.3)           | 1.8 (0.6, 3.0)       | 1.5 (0.5, 2.4)       | 1.2 (0.1, 2.2)       | 0.9 (-0.3, 2.2)      |
| <b>Kazakhstan</b>                                 |                          |                      |                      |                      |                      |                          |                      |                      |                      |                      |
| rural                                             | 141.0 (139.2, 142.6)     | 109.6 (106.2, 113.1) | 134.1 (132.1, 136.2) | 157.7 (156.0, 159.4) | 159.3 (157.4, 161.3) | 145.4 (144.2, 146.5)     | 113.7 (111.6, 115.8) | 138.7 (137.4, 140.0) | 162.3 (160.8, 163.6) | 163.4 (162.0, 164.9) |
| urban                                             | 143.3 (141.6, 145.0)     | 112.8 (109.3, 116.3) | 136.7 (134.7, 138.7) | 159.7 (157.9, 161.4) | 160.9 (159.0, 162.9) | 146.5 (145.3, 147.6)     | 115.6 (113.6, 117.8) | 140.0 (138.7, 141.4) | 163.0 (161.6, 164.3) | 163.7 (162.4, 165.1) |
| urban-rural difference                            | 2.3 (1.4, 3.2)           | 3.2 (1.9, 4.4)       | 2.6 (1.6, 3.5)       | 2.0 (1.1, 2.8)       | 1.6 (0.6, 2.6)       | 1.1 (0.4, 1.8)           | 1.9 (0.8, 3.0)       | 1.3 (0.5, 2.1)       | 0.7 (0.0, 1.5)       | 0.4 (-0.6, 1.3)      |
| <b>Kyrgyzstan</b>                                 |                          |                      |                      |                      |                      |                          |                      |                      |                      |                      |

| Girls                               | Mean height in 1990 (cm) |                      |                      |                      |                      | Mean height in 2020 (cm) |                      |                      |                      |                      |
|-------------------------------------|--------------------------|----------------------|----------------------|----------------------|----------------------|--------------------------|----------------------|----------------------|----------------------|----------------------|
|                                     | Age-standardised         | 5 years              | 10 years             | 15 years             | 19 years             | Age-standardised         | 5 years              | 10 years             | 15 years             | 19 years             |
| rural                               | 139.6 (137.7, 141.5)     | 111.0 (107.3, 114.6) | 132.7 (130.4, 135.0) | 155.1 (153.1, 157.0) | 157.4 (155.5, 159.5) | 142.4 (140.9, 144.1)     | 113.8 (110.9, 116.7) | 135.6 (133.7, 137.5) | 158.0 (156.3, 159.8) | 160.5 (158.6, 162.4) |
| urban                               | 141.9 (140.0, 143.8)     | 113.7 (110.1, 117.3) | 135.1 (132.9, 137.4) | 157.2 (155.3, 159.2) | 159.4 (157.5, 161.4) | 143.5 (141.9, 145.1)     | 115.2 (112.3, 118.1) | 136.7 (134.8, 138.7) | 158.9 (157.2, 160.7) | 161.2 (159.3, 163.1) |
| urban-rural difference              | 2.3 (1.4, 3.3)           | 2.7 (1.4, 4.0)       | 2.4 (1.4, 3.5)       | 2.2 (1.2, 3.1)       | 2.0 (0.9, 3.0)       | 1.1 (0.2, 1.9)           | 1.4 (0.2, 2.6)       | 1.2 (0.2, 2.0)       | 0.9 (0.1, 1.8)       | 0.7 (-0.3, 1.7)      |
| <b>Mongolia</b>                     |                          |                      |                      |                      |                      |                          |                      |                      |                      |                      |
| rural                               | 139.9 (137.3, 142.3)     | 110.9 (106.0, 116.0) | 133.1 (130.3, 135.8) | 155.7 (153.2, 158.2) | 157.3 (154.2, 160.4) | 142.9 (140.6, 145.2)     | 114.9 (109.4, 120.4) | 136.4 (133.7, 139.3) | 158.3 (156.8, 159.9) | 159.3 (157.9, 160.8) |
| urban                               | 142.4 (139.8, 144.8)     | 113.9 (108.9, 118.8) | 135.7 (132.9, 138.5) | 158.0 (155.5, 160.5) | 159.5 (156.4, 162.6) | 144.2 (141.9, 146.5)     | 116.7 (111.2, 122.2) | 137.9 (135.1, 140.7) | 159.4 (157.9, 161.0) | 160.2 (158.9, 161.6) |
| urban-rural difference              | 2.5 (1.4, 3.7)           | 3.0 (1.3, 4.6)       | 2.6 (1.4, 3.9)       | 2.3 (1.3, 3.4)       | 2.2 (1.1, 3.2)       | 1.3 (0.3, 2.3)           | 1.7 (0.2, 3.3)       | 1.4 (0.3, 2.5)       | 1.1 (0.3, 2.0)       | 0.9 (0.1, 1.8)       |
| <b>Tajikistan</b>                   |                          |                      |                      |                      |                      |                          |                      |                      |                      |                      |
| rural                               | 138.3 (136.1, 140.5)     | 109.5 (105.5, 113.4) | 131.2 (128.7, 133.7) | 153.9 (151.5, 156.3) | 156.9 (154.0, 159.9) | 140.3 (139.2, 141.4)     | 112.4 (109.6, 115.3) | 133.4 (131.9, 134.9) | 155.6 (154.2, 156.9) | 158.2 (156.7, 159.7) |
| urban                               | 140.4 (138.1, 142.7)     | 111.9 (107.9, 115.8) | 133.4 (130.8, 136.0) | 155.9 (153.4, 158.4) | 158.8 (155.8, 161.9) | 141.2 (140.0, 142.4)     | 113.5 (110.6, 116.5) | 134.4 (132.8, 135.9) | 156.4 (155.0, 157.8) | 158.9 (157.4, 160.4) |
| urban-rural difference              | 2.1 (1.1, 3.2)           | 2.4 (1.0, 3.7)       | 2.2 (1.1, 3.3)       | 2.0 (1.0, 3.1)       | 1.9 (0.7, 3.1)       | 0.9 (0.1, 1.7)           | 1.1 (-0.1, 2.3)      | 1.0 (0.1, 1.8)       | 0.8 (0.1, 1.5)       | 0.7 (-0.2, 1.5)      |
| <b>Turkmenistan</b>                 |                          |                      |                      |                      |                      |                          |                      |                      |                      |                      |
| rural                               | 139.6 (137.2, 142.0)     | 110.8 (106.7, 114.9) | 132.3 (129.4, 135.3) | 155.2 (152.6, 157.9) | 158.9 (156.5, 161.3) | 143.2 (141.5, 145.0)     | 114.1 (110.6, 117.7) | 135.9 (133.7, 138.1) | 159.0 (156.8, 161.1) | 162.7 (160.8, 164.5) |
| urban                               | 141.9 (139.5, 144.3)     | 113.5 (109.5, 117.6) | 134.7 (131.8, 137.7) | 157.4 (154.7, 160.1) | 160.8 (158.4, 163.3) | 144.3 (142.6, 146.1)     | 115.6 (112.1, 119.1) | 137.1 (134.9, 139.2) | 159.9 (157.8, 162.1) | 163.4 (161.6, 165.2) |
| urban-rural difference              | 2.3 (1.0, 3.6)           | 2.7 (1.2, 4.3)       | 2.4 (1.1, 3.8)       | 2.1 (0.8, 3.5)       | 1.9 (0.4, 3.5)       | 1.1 (0.0, 2.2)           | 1.5 (0.1, 2.9)       | 1.2 (0.1, 2.3)       | 0.9 (-0.2, 2.1)      | 0.7 (-0.6, 2.0)      |
| <b>Uzbekistan</b>                   |                          |                      |                      |                      |                      |                          |                      |                      |                      |                      |
| rural                               | 140.7 (138.5, 142.8)     | 111.6 (106.7, 116.5) | 133.7 (131.0, 136.3) | 156.4 (154.5, 158.2) | 159.0 (157.3, 160.7) | 143.2 (140.6, 145.9)     | 115.4 (109.7, 121.3) | 136.7 (133.4, 140.0) | 158.4 (156.3, 160.4) | 160.2 (158.6, 161.8) |
| urban                               | 142.6 (140.5, 144.7)     | 114.0 (109.2, 118.8) | 135.8 (133.2, 138.4) | 158.1 (156.2, 160.0) | 160.5 (158.8, 162.2) | 144.0 (141.3, 146.7)     | 116.6 (110.9, 122.5) | 137.6 (134.2, 141.0) | 158.9 (156.9, 161.0) | 160.5 (158.8, 162.1) |
| urban-rural difference              | 1.9 (0.9, 2.9)           | 2.4 (0.9, 4.0)       | 2.1 (1.0, 3.2)       | 1.7 (0.9, 2.6)       | 1.5 (0.6, 2.4)       | 0.7 (-0.3, 1.8)          | 1.2 (-0.4, 2.8)      | 0.9 (-0.3, 2.0)      | 0.5 (-0.4, 1.5)      | 0.3 (-0.7, 1.3)      |
| <b>Middle East and north Africa</b> |                          |                      |                      |                      |                      |                          |                      |                      |                      |                      |
| <b>Algeria</b>                      |                          |                      |                      |                      |                      |                          |                      |                      |                      |                      |
| rural                               | 140.6 (137.3, 144.0)     | 107.8 (102.6, 113.2) | 135.5 (131.5, 139.5) | 156.0 (152.7, 159.4) | 158.0 (154.7, 161.4) | 144.4 (140.9, 147.8)     | 111.7 (105.7, 117.6) | 139.3 (135.0, 143.5) | 159.8 (156.9, 162.8) | 161.7 (159.6, 163.8) |
| urban                               | 142.5 (139.2, 145.9)     | 110.1 (105.0, 115.5) | 137.5 (133.6, 141.4) | 157.8 (154.5, 161.1) | 159.6 (156.3, 163.0) | 145.6 (142.2, 149.0)     | 113.4 (107.3, 119.4) | 140.6 (136.4, 144.7) | 160.9 (158.0, 163.8) | 162.6 (160.6, 164.6) |
| urban-rural difference              | 1.9 (0.6, 3.3)           | 2.3 (0.7, 3.9)       | 2.0 (0.7, 3.4)       | 1.8 (0.5, 3.2)       | 1.6 (0.1, 3.1)       | 1.3 (0.0, 2.6)           | 1.6 (0.0, 3.3)       | 1.4 (0.0, 2.7)       | 1.1 (-0.1, 2.4)      | 0.9 (-0.4, 2.3)      |
| <b>Bahrain</b>                      |                          |                      |                      |                      |                      |                          |                      |                      |                      |                      |
| rural                               | 140.2 (137.5, 143.0)     | 108.6 (103.9, 113.3) | 136.0 (132.9, 139.1) | 155.0 (152.3, 157.6) | 155.3 (152.3, 158.3) | 143.9 (141.3, 146.5)     | 113.6 (108.5, 118.7) | 140.0 (137.2, 142.9) | 158.1 (155.8, 160.4) | 157.7 (155.2, 160.3) |
| urban                               | 142.1 (139.7, 144.6)     | 111.0 (106.5, 115.6) | 138.1 (135.2, 141.0) | 156.6 (154.3, 158.9) | 156.9 (154.2, 159.6) | 145.2 (142.9, 147.4)     | 115.4 (110.5, 120.3) | 141.5 (138.9, 144.1) | 159.2 (157.2, 161.1) | 158.6 (156.7, 160.8) |
| urban-rural difference              | 1.9 (0.5, 3.4)           | 2.4 (0.7, 4.0)       | 2.1 (0.6, 3.6)       | 1.7 (0.1, 3.2)       | 1.6 (-0.1, 3.3)      | 1.3 (-0.2, 2.8)          | 1.8 (0.0, 3.5)       | 1.4 (-0.1, 2.9)      | 1.0 (-0.5, 2.6)      | 0.9 (-0.7, 2.6)      |
| <b>Egypt</b>                        |                          |                      |                      |                      |                      |                          |                      |                      |                      |                      |
| rural                               | 137.6 (136.0, 139.0)     | 104.2 (101.6, 106.7) | 131.6 (129.9, 133.3) | 153.3 (151.7, 155.0) | 157.5 (155.6, 159.4) | 142.1 (140.1, 144.2)     | 109.8 (105.7, 113.9) | 136.4 (134.0, 139.0) | 157.5 (156.1, 159.0) | 161.1 (159.7, 162.5) |
| urban                               | 139.2 (137.7, 140.8)     | 106.4 (103.8, 109.0) | 133.4 (131.7, 135.2) | 154.8 (153.1, 156.4) | 158.6 (156.7, 160.5) | 143.2 (141.2, 145.3)     | 111.4 (107.2, 115.6) | 137.6 (135.2, 140.2) | 158.3 (156.9, 159.8) | 161.6 (160.1, 163.0) |
| urban-rural difference              | 1.7 (0.7, 2.7)           | 2.2 (0.7, 3.7)       | 1.8 (0.7, 2.9)       | 1.4 (0.5, 2.3)       | 1.1 (0.2, 2.0)       | 1.0 (0.1, 2.0)           | 1.6 (0.1, 3.1)       | 1.2 (0.1, 2.3)       | 0.8 (0.0, 1.6)       | 0.5 (-0.3, 1.3)      |
| <b>Iran</b>                         |                          |                      |                      |                      |                      |                          |                      |                      |                      |                      |
| rural                               | 138.3 (137.4, 139.2)     | 105.8 (104.6, 106.9) | 132.6 (131.7, 133.6) | 154.1 (153.2, 155.1) | 156.6 (155.3, 157.8) | 141.4 (140.6, 142.3)     | 107.5 (105.7, 109.4) | 135.5 (134.5, 136.5) | 157.9 (157.1, 158.7) | 160.5 (159.6, 161.3) |
| urban                               | 140.8 (139.9, 141.7)     | 108.1 (107.0, 109.2) | 135.0 (134.1, 135.9) | 156.6 (155.7, 157.6) | 159.1 (157.8, 160.3) | 143.1 (142.2, 143.9)     | 109.1 (107.3, 110.9) | 137.1 (136.1, 138.0) | 159.5 (158.7, 160.3) | 162.2 (161.3, 163.0) |
| urban-rural difference              | 2.4 (1.9, 3.0)           | 2.4 (1.7, 3.1)       | 2.4 (1.8, 3.0)       | 2.5 (1.9, 3.0)       | 2.5 (1.9, 3.1)       | 1.6 (1.2, 2.1)           | 1.6 (0.9, 2.2)       | 1.6 (1.1, 2.1)       | 1.7 (1.2, 2.1)       | 1.7 (1.2, 2.2)       |
| <b>Iraq</b>                         |                          |                      |                      |                      |                      |                          |                      |                      |                      |                      |
| rural                               | 139.7 (136.8, 142.5)     | 107.1 (102.2, 111.9) | 134.9 (131.7, 138.2) | 155.0 (152.2, 157.9) | 156.5 (153.5, 159.4) | 142.0 (139.2, 144.9)     | 110.9 (105.2, 116.5) | 137.6 (134.2, 141.0) | 156.7 (154.3, 159.2) | 157.4 (155.3, 159.5) |
| urban                               | 142.0 (139.3, 144.7)     | 109.7 (105.0, 114.4) | 137.3 (134.1, 140.5) | 157.1 (154.4, 159.9) | 158.5 (155.7, 161.4) | 143.6 (140.8, 146.5)     | 112.8 (107.1, 118.3) | 139.3 (135.9, 142.7) | 158.2 (155.8, 160.6) | 158.8 (156.8, 160.8) |
| urban-rural difference              | 2.3 (0.9, 3.6)           | 2.6 (0.9, 4.2)       | 2.4 (1.0, 3.7)       | 2.1 (0.7, 3.5)       | 2.0 (0.4, 3.5)       | 1.6 (0.4, 2.9)           | 1.9 (0.3, 3.6)       | 1.7 (0.4, 3.0)       | 1.5 (0.2, 2.8)       | 1.4 (0.0, 2.8)       |
| <b>Jordan</b>                       |                          |                      |                      |                      |                      |                          |                      |                      |                      |                      |
| rural                               | 140.2 (138.7, 141.9)     | 108.3 (105.6, 111.1) | 135.3 (133.5, 137.2) | 155.4 (153.6, 157.2) | 157.0 (155.3, 158.8) | 143.4 (141.8, 145.0)     | 112.6 (109.8, 115.4) | 138.7 (136.7, 140.6) | 158.1 (156.5, 159.6) | 159.3 (157.8, 160.7) |
| urban                               | 141.8 (140.2, 143.4)     | 109.9 (107.3, 112.7) | 136.9 (135.0, 138.8) | 156.9 (155.1, 158.7) | 158.5 (156.8, 160.3) | 144.2 (142.6, 145.8)     | 113.6 (110.9, 116.2) | 139.5 (137.7, 141.3) | 158.8 (157.3, 160.4) | 160.0 (158.7, 161.4) |
| urban-rural difference              | 1.6 (0.7, 2.5)           | 1.7 (0.4, 3.0)       | 1.6 (0.6, 2.6)       | 1.5 (0.7, 2.3)       | 1.5 (0.6, 2.4)       | 0.8 (0.0, 1.7)           | 0.9 (-0.4, 2.2)      | 0.9 (-0.1, 1.8)      | 0.8 (0.0, 1.6)       | 0.7 (-0.1, 1.6)      |
| <b>Kuwait</b>                       |                          |                      |                      |                      |                      |                          |                      |                      |                      |                      |
| rural                               | 141.2 (139.3, 143.1)     | 108.3 (106.1, 110.5) | 137.3 (135.4, 139.3) | 155.9 (153.8, 158.1) | 156.6 (154.0, 159.4) | 143.4 (141.3, 145.6)     | 111.3 (107.8, 114.7) | 139.8 (137.3, 142.2) | 158.0 (156.0, 159.9) | 158.3 (156.3, 160.4) |
| urban                               | 143.1 (141.9, 144.4)     | 110.8 (109.3, 112.2) | 139.5 (138.2, 140.7) | 157.7 (156.2, 159.2) | 158.2 (156.1, 160.3) | 144.8 (143.1, 146.5)     | 113.1 (110.0, 116.2) | 141.2 (139.2, 143.2) | 159.1 (157.6, 160.4) | 159.2 (157.9, 160.5) |
| urban-rural difference              | 2.0 (0.5, 3.5)           | 2.5 (0.8, 4.1)       | 2.1 (0.7, 3.6)       | 1.8 (0.2, 3.3)       | 1.5 (-0.3, 3.3)      | 1.3 (-0.2, 2.8)          | 1.8 (0.1, 3.5)       | 1.4 (-0.1, 2.9)      | 1.1 (-0.4, 2.5)      | 0.8 (-0.8, 2.5)      |
| <b>Lebanon</b>                      |                          |                      |                      |                      |                      |                          |                      |                      |                      |                      |
| rural                               | 142.9 (141.2, 144.7)     | 108.2 (106.1, 110.3) | 138.0 (136.1, 139.9) | 159.1 (157.2, 161.1) | 160.5 (158.5, 162.5) | 146.3 (144.1, 148.6)     | 112.6 (108.9, 116.4) | 141.6 (138.9, 144.2) | 162.1 (160.1, 164.2) | 163.0 (161.0, 165.0) |
| urban                               | 144.6 (142.9, 146.3)     | 110.1 (108.0, 112.1) | 139.7 (137.9, 141.6) | 160.7 (158.8, 162.7) | 162.0 (160.0, 164.1) | 147.4 (145.1, 149.6)     | 113.8 (110.1, 117.5) | 142.7 (140.1, 145.3) | 163.1 (161.1, 165.1) | 163.9 (161.9, 165.8) |

| Girls                          | Mean height in 1990 (cm) |                      |                      |                      |                      | Mean height in 2020 (cm) |                      |                      |                      |                      |
|--------------------------------|--------------------------|----------------------|----------------------|----------------------|----------------------|--------------------------|----------------------|----------------------|----------------------|----------------------|
|                                | Age-standardised         | 5 years              | 10 years             | 15 years             | 19 years             | Age-standardised         | 5 years              | 10 years             | 15 years             | 19 years             |
| urban-rural difference         | 1.7 (0.8, 2.6)           | 1.9 (0.6, 3.0)       | 1.7 (0.8, 2.6)       | 1.6 (0.7, 2.5)       | 1.5 (0.5, 2.6)       | 1.0 (0.1, 2.0)           | 1.2 (-0.1, 2.5)      | 1.1 (0.1, 2.1)       | 1.0 (0.0, 1.9)       | 0.9 (-0.2, 2.0)      |
| Libya                          |                          |                      |                      |                      |                      |                          |                      |                      |                      |                      |
| rural                          | 140.7 (137.2, 144.3)     | 107.6 (102.2, 113.1) | 135.4 (131.2, 139.5) | 156.3 (152.4, 159.9) | 159.1 (155.1, 163.1) | 143.8 (139.8, 148.0)     | 111.2 (104.8, 117.6) | 138.6 (133.9, 143.3) | 159.2 (155.5, 163.1) | 161.8 (158.3, 165.4) |
| urban                          | 142.7 (139.2, 146.2)     | 109.9 (104.6, 115.3) | 137.4 (133.4, 141.5) | 158.0 (154.5, 161.7) | 160.6 (156.8, 164.5) | 145.1 (141.1, 149.1)     | 112.8 (106.5, 119.1) | 139.9 (135.3, 144.6) | 160.3 (156.7, 164.1) | 162.7 (159.4, 166.0) |
| urban-rural difference         | 1.9 (0.4, 3.4)           | 2.3 (0.7, 4.0)       | 2.0 (0.5, 3.5)       | 1.8 (0.2, 3.3)       | 1.5 (-0.2, 3.3)      | 1.3 (-0.3, 2.7)          | 1.7 (0.0, 3.4)       | 1.4 (-0.2, 2.9)      | 1.1 (-0.5, 2.6)      | 0.9 (-0.9, 2.6)      |
| Morocco                        |                          |                      |                      |                      |                      |                          |                      |                      |                      |                      |
| rural                          | 139.3 (137.1, 141.6)     | 107.3 (103.9, 110.9) | 134.2 (131.7, 136.7) | 154.4 (151.9, 156.9) | 156.9 (154.1, 159.8) | 141.9 (140.5, 143.3)     | 109.7 (107.3, 112.1) | 136.6 (135.0, 138.2) | 157.1 (155.6, 158.8) | 159.9 (158.1, 161.7) |
| urban                          | 141.7 (139.4, 143.9)     | 110.2 (106.8, 113.8) | 136.7 (134.2, 139.1) | 156.5 (154.0, 159.1) | 158.7 (155.9, 161.5) | 143.7 (142.3, 145.1)     | 112.0 (109.6, 114.4) | 138.5 (136.9, 140.2) | 158.7 (157.1, 160.3) | 161.1 (159.4, 162.9) |
| urban-rural difference         | 2.3 (1.3, 3.3)           | 2.9 (1.5, 4.2)       | 2.5 (1.5, 3.5)       | 2.1 (1.1, 3.0)       | 1.8 (0.7, 2.9)       | 1.8 (0.9, 2.7)           | 2.3 (1.0, 3.6)       | 1.9 (1.0, 2.9)       | 1.5 (0.7, 2.4)       | 1.2 (0.3, 2.2)       |
| Occupied Palestinian Territory |                          |                      |                      |                      |                      |                          |                      |                      |                      |                      |
| rural                          | 140.5 (138.2, 142.8)     | 107.7 (103.3, 112.2) | 135.4 (132.8, 138.1) | 155.9 (153.7, 158.0) | 157.9 (155.9, 160.0) | 143.8 (141.0, 146.7)     | 111.6 (106.0, 117.3) | 138.9 (135.6, 142.3) | 159.1 (156.9, 161.3) | 160.7 (158.5, 163.0) |
| urban                          | 142.4 (140.3, 144.6)     | 110.1 (105.8, 114.5) | 137.4 (134.9, 140.1) | 157.6 (155.5, 159.7) | 159.4 (157.5, 161.4) | 145.1 (142.4, 147.9)     | 113.3 (107.6, 119.0) | 140.3 (137.1, 143.6) | 160.2 (158.1, 162.3) | 161.6 (159.5, 163.8) |
| urban-rural difference         | 1.9 (0.7, 3.1)           | 2.3 (0.8, 3.9)       | 2.0 (0.8, 3.3)       | 1.7 (0.5, 2.9)       | 1.5 (0.2, 2.8)       | 1.3 (0.0, 2.6)           | 1.7 (0.0, 3.4)       | 1.4 (0.0, 2.7)       | 1.1 (-0.2, 2.4)      | 0.8 (-0.6, 2.2)      |
| Oman                           |                          |                      |                      |                      |                      |                          |                      |                      |                      |                      |
| rural                          | 137.1 (134.5, 139.8)     | 104.0 (99.7, 108.5)  | 131.8 (128.9, 134.6) | 152.7 (149.7, 155.7) | 155.5 (151.9, 159.3) | 140.6 (138.2, 143.1)     | 108.8 (103.7, 114.2) | 135.6 (132.7, 138.6) | 155.7 (153.8, 157.5) | 157.8 (155.7, 159.8) |
| urban                          | 138.8 (136.3, 141.5)     | 106.2 (101.9, 110.5) | 133.6 (130.9, 136.4) | 154.2 (151.4, 157.2) | 156.8 (153.2, 160.5) | 141.7 (139.4, 144.1)     | 110.3 (105.3, 115.7) | 136.8 (134.0, 139.7) | 156.6 (154.9, 158.2) | 158.4 (156.6, 160.1) |
| urban-rural difference         | 1.7 (0.4, 3.0)           | 2.1 (0.6, 3.8)       | 1.8 (0.5, 3.2)       | 1.5 (0.2, 2.8)       | 1.3 (-0.2, 2.7)      | 1.1 (-0.2, 2.3)          | 1.5 (-0.2, 3.2)      | 1.2 (-0.2, 2.5)      | 0.9 (-0.4, 2.1)      | 0.6 (-0.7, 2.0)      |
| Qatar                          |                          |                      |                      |                      |                      |                          |                      |                      |                      |                      |
| rural                          | 140.4 (137.3, 143.5)     | 107.7 (102.8, 112.6) | 135.4 (132.0, 138.8) | 155.7 (152.4, 159.1) | 157.5 (153.6, 161.3) | 143.5 (140.4, 146.6)     | 111.4 (105.8, 117.2) | 138.6 (135.0, 142.4) | 158.6 (155.9, 161.3) | 160.0 (157.4, 162.7) |
| urban                          | 142.3 (139.4, 145.2)     | 110.0 (105.5, 114.8) | 137.5 (134.2, 140.7) | 157.5 (154.4, 160.6) | 159.0 (155.6, 162.5) | 144.7 (141.8, 147.7)     | 113.0 (107.4, 118.8) | 140.0 (136.5, 143.7) | 159.7 (157.3, 162.1) | 160.9 (158.8, 163.0) |
| urban-rural difference         | 1.9 (0.4, 3.3)           | 2.3 (0.7, 4.0)       | 2.0 (0.5, 3.5)       | 1.8 (0.2, 3.3)       | 1.5 (-0.2, 3.3)      | 1.3 (-0.2, 2.7)          | 1.7 (-0.1, 3.3)      | 1.4 (-0.1, 2.9)      | 1.1 (-0.4, 2.6)      | 0.9 (-0.8, 2.5)      |
| Saudi Arabia                   |                          |                      |                      |                      |                      |                          |                      |                      |                      |                      |
| rural                          | 136.5 (135.1, 138.0)     | 105.2 (103.1, 107.2) | 131.8 (130.2, 133.5) | 151.2 (149.6, 152.9) | 153.0 (150.9, 154.9) | 141.2 (139.0, 143.4)     | 109.0 (105.0, 113.0) | 136.1 (133.6, 138.6) | 156.3 (154.5, 158.2) | 158.6 (156.8, 160.5) |
| urban                          | 137.9 (136.7, 139.1)     | 106.9 (105.1, 108.7) | 133.3 (132.0, 134.7) | 152.4 (151.1, 153.8) | 154.0 (152.2, 155.6) | 141.8 (139.8, 143.9)     | 110.1 (106.3, 113.9) | 136.9 (134.5, 139.2) | 156.8 (155.2, 158.5) | 158.9 (157.3, 160.5) |
| urban-rural difference         | 1.4 (0.2, 2.5)           | 1.8 (0.3, 3.2)       | 1.5 (0.3, 2.7)       | 1.2 (0.0, 2.4)       | 1.0 (-0.3, 2.3)      | 0.7 (-0.5, 1.8)          | 1.0 (-0.5, 2.6)      | 0.8 (-0.4, 1.9)      | 0.5 (-0.6, 1.6)      | 0.3 (-0.9, 1.5)      |
| Syrian Arab Republic           |                          |                      |                      |                      |                      |                          |                      |                      |                      |                      |
| rural                          | 139.4 (134.1, 144.5)     | 106.6 (100.7, 112.5) | 134.3 (129.2, 139.3) | 154.8 (149.2, 160.3) | 157.0 (149.6, 164.4) | 142.7 (137.3, 147.9)     | 110.3 (103.5, 117.2) | 137.7 (132.2, 143.0) | 157.9 (152.4, 163.1) | 159.8 (153.0, 166.9) |
| urban                          | 141.3 (136.1, 146.4)     | 108.9 (103.0, 114.8) | 136.3 (131.2, 141.3) | 156.5 (150.9, 162.0) | 158.5 (151.1, 166.0) | 143.9 (138.4, 149.0)     | 112.0 (105.2, 118.8) | 139.0 (133.5, 144.2) | 159.0 (153.5, 164.3) | 160.7 (154.0, 167.7) |
| urban-rural difference         | 1.9 (0.4, 3.4)           | 2.3 (0.6, 4.0)       | 2.0 (0.5, 3.5)       | 1.7 (0.2, 3.3)       | 1.5 (-0.2, 3.4)      | 1.3 (-0.2, 2.7)          | 1.6 (-0.1, 3.4)      | 1.4 (-0.1, 2.9)      | 1.1 (-0.5, 2.6)      | 0.9 (-0.8, 2.6)      |
| Tunisia                        |                          |                      |                      |                      |                      |                          |                      |                      |                      |                      |
| rural                          | 140.9 (139.2, 142.6)     | 107.1 (105.1, 109.1) | 136.2 (134.4, 138.0) | 156.9 (155.0, 158.7) | 157.5 (155.6, 159.4) | 144.3 (142.0, 146.6)     | 110.3 (106.7, 113.9) | 139.5 (136.9, 142.1) | 160.4 (158.1, 162.5) | 161.0 (158.9, 163.2) |
| urban                          | 143.2 (141.5, 144.8)     | 109.9 (108.0, 111.8) | 138.6 (136.8, 140.4) | 158.9 (157.0, 160.7) | 159.3 (157.4, 161.3) | 145.9 (143.6, 148.1)     | 112.4 (108.9, 115.8) | 141.2 (138.7, 143.7) | 161.8 (159.7, 163.9) | 162.2 (160.1, 164.3) |
| urban-rural difference         | 2.2 (1.4, 3.1)           | 2.7 (1.6, 3.9)       | 2.4 (1.5, 3.3)       | 2.0 (1.2, 2.9)       | 1.8 (0.9, 2.8)       | 1.6 (0.6, 2.6)           | 2.1 (0.7, 3.4)       | 1.7 (0.7, 2.8)       | 1.4 (0.4, 2.3)       | 1.2 (0.2, 2.2)       |
| Turkey                         |                          |                      |                      |                      |                      |                          |                      |                      |                      |                      |
| rural                          | 139.5 (137.8, 141.2)     | 108.4 (105.3, 111.4) | 134.6 (132.6, 136.7) | 154.4 (152.6, 156.1) | 155.7 (153.9, 157.6) | 143.6 (142.3, 145.0)     | 111.6 (109.2, 114.1) | 138.4 (136.8, 140.1) | 158.9 (157.5, 160.3) | 160.8 (159.3, 162.4) |
| urban                          | 141.6 (140.0, 143.3)     | 110.9 (107.9, 114.0) | 136.9 (134.8, 139.0) | 156.3 (154.6, 158.0) | 157.4 (155.5, 159.2) | 145.2 (143.9, 146.4)     | 113.6 (111.3, 115.9) | 140.1 (138.5, 141.7) | 160.3 (158.9, 161.6) | 161.9 (160.5, 163.4) |
| urban-rural difference         | 2.1 (1.2, 2.9)           | 2.6 (1.3, 3.8)       | 2.2 (1.3, 3.1)       | 1.9 (1.1, 2.7)       | 1.7 (0.8, 2.5)       | 1.5 (0.8, 2.3)           | 2.0 (0.9, 3.1)       | 1.7 (0.9, 2.5)       | 1.4 (0.7, 2.1)       | 1.1 (0.3, 1.9)       |
| United Arab Emirates           |                          |                      |                      |                      |                      |                          |                      |                      |                      |                      |
| rural                          | 141.8 (139.2, 144.5)     | 110.0 (105.9, 114.2) | 137.2 (134.6, 139.8) | 156.6 (153.6, 159.7) | 158.3 (154.4, 162.3) | 144.6 (142.3, 147.0)     | 113.8 (108.7, 118.7) | 140.2 (137.5, 143.0) | 159.1 (157.2, 160.9) | 160.3 (158.3, 162.4) |
| urban                          | 143.6 (141.2, 146.2)     | 112.4 (108.3, 116.4) | 139.1 (136.8, 141.6) | 158.2 (155.4, 161.2) | 159.6 (155.9, 163.5) | 145.8 (143.7, 148.0)     | 115.5 (110.6, 120.4) | 141.6 (139.0, 144.1) | 160.0 (158.5, 161.7) | 160.9 (159.2, 162.8) |
| urban-rural difference         | 1.8 (0.5, 3.2)           | 2.4 (0.7, 4.0)       | 2.0 (0.6, 3.3)       | 1.6 (0.3, 3.0)       | 1.3 (-0.2, 2.8)      | 1.2 (-0.1, 2.6)          | 1.7 (0.0, 3.4)       | 1.3 (0.0, 2.8)       | 1.0 (-0.4, 2.3)      | 0.7 (-0.8, 2.1)      |
| Yemen                          |                          |                      |                      |                      |                      |                          |                      |                      |                      |                      |
| rural                          | 131.9 (130.1, 133.7)     | 97.8 (95.4, 100.3)   | 125.2 (123.2, 127.2) | 148.1 (146.2, 150.2) | 153.6 (151.2, 156.0) | 135.2 (133.1, 137.5)     | 103.0 (99.4, 106.9)  | 129.0 (126.3, 131.6) | 150.8 (148.9, 152.6) | 155.2 (153.4, 157.0) |
| urban                          | 133.3 (131.5, 135.1)     | 99.6 (97.2, 102.0)   | 126.7 (124.8, 128.8) | 149.4 (147.4, 151.5) | 154.6 (152.2, 157.1) | 136.0 (133.8, 138.3)     | 104.1 (100.5, 108.0) | 129.9 (127.2, 132.6) | 151.4 (149.5, 153.3) | 155.7 (153.8, 157.5) |
| urban-rural difference         | 1.4 (0.5, 2.3)           | 1.8 (0.6, 2.9)       | 1.5 (0.6, 2.5)       | 1.3 (0.4, 2.1)       | 1.1 (0.1, 2.0)       | 0.8 (0.0, 1.6)           | 1.1 (0.0, 2.3)       | 0.9 (0.0, 1.7)       | 0.6 (-0.1, 1.4)      | 0.4 (-0.4, 1.3)      |
| <b>East and southeast Asia</b> |                          |                      |                      |                      |                      |                          |                      |                      |                      |                      |
| <i>East Asia</i>               |                          |                      |                      |                      |                      |                          |                      |                      |                      |                      |
| China                          |                          |                      |                      |                      |                      |                          |                      |                      |                      |                      |
| rural                          | 138.4 (137.7, 139.0)     | 104.4 (103.7, 105.2) | 133.6 (132.9, 134.2) | 153.9 (153.2, 154.6) | 156.5 (155.6, 157.3) | 147.1 (146.2, 148.0)     | 114.4 (112.6, 116.2) | 143.0 (142.0, 144.0) | 162.0 (161.2, 162.9) | 163.2 (162.3, 164.1) |
| urban                          | 141.5 (140.8, 142.1)     | 108.3 (107.5, 109.1) | 136.9 (136.2, 137.5) | 156.7 (156.0, 157.4) | 158.8 (158.0, 159.7) | 148.9 (148.1, 149.8)     | 117.0 (115.1, 118.7) | 145.0 (144.0, 146.0) | 163.6 (162.8, 164.4) | 164.3 (163.4, 165.2) |
| urban-rural difference         | 3.1 (2.7, 3.5)           | 3.8 (3.3, 4.3)       | 3.3 (2.9, 3.7)       | 2.8 (2.4, 3.2)       | 2.4 (1.9, 2.9)       | 1.8 (1.3, 2.4)           | 2.6 (1.9, 3.2)       | 2.0 (1.5, 2.6)       | 1.5 (1.0, 2.0)       | 1.1 (0.5, 1.6)       |

| Girls                  | Mean height in 1990 (cm) |                      |                      |                      |                      | Mean height in 2020 (cm) |                      |                      |                      |                      |
|------------------------|--------------------------|----------------------|----------------------|----------------------|----------------------|--------------------------|----------------------|----------------------|----------------------|----------------------|
|                        | Age-standardised         | 5 years              | 10 years             | 15 years             | 19 years             | Age-standardised         | 5 years              | 10 years             | 15 years             | 19 years             |
| North Korea            |                          |                      |                      |                      |                      |                          |                      |                      |                      |                      |
| rural                  | 139.9 (133.9, 145.9)     | 105.9 (99.2, 112.9)  | 135.8 (129.9, 141.7) | 155.0 (148.4, 161.4) | 156.9 (148.6, 165.6) | 144.6 (138.6, 150.7)     | 111.7 (104.2, 119.1) | 141.0 (134.8, 147.0) | 159.3 (152.9, 165.5) | 160.4 (152.6, 168.5) |
| urban                  | 142.2 (136.2, 148.2)     | 108.6 (101.7, 115.3) | 138.2 (132.3, 144.2) | 157.1 (150.4, 163.6) | 158.9 (150.5, 167.7) | 145.7 (139.6, 151.7)     | 113.2 (105.6, 120.6) | 142.1 (135.9, 148.1) | 160.1 (153.7, 166.4) | 161.0 (153.4, 169.2) |
| urban-rural difference | 2.3 (0.6, 4.0)           | 2.7 (0.9, 4.5)       | 2.4 (0.8, 4.1)       | 2.1 (0.3, 3.9)       | 2.0 (-0.1, 4.0)      | 1.0 (-0.6, 2.7)          | 1.4 (-0.5, 3.3)      | 1.1 (-0.6, 2.8)      | 0.8 (-0.9, 2.5)      | 0.7 (-1.2, 2.5)      |
| Taiwan                 |                          |                      |                      |                      |                      |                          |                      |                      |                      |                      |
| rural                  | 142.9 (141.1, 144.6)     | 107.7 (105.7, 109.6) | 139.2 (137.5, 141.0) | 158.3 (156.2, 160.5) | 159.5 (156.9, 162.3) | 145.7 (144.4, 147.1)     | 112.6 (110.3, 114.9) | 142.7 (141.2, 144.3) | 160.2 (158.9, 161.4) | 160.2 (158.7, 161.8) |
| urban                  | 144.4 (142.8, 146.1)     | 109.1 (107.3, 110.9) | 140.8 (139.2, 142.4) | 159.9 (157.9, 161.9) | 161.1 (158.6, 163.8) | 145.8 (144.6, 147.1)     | 112.6 (110.4, 115.0) | 142.8 (141.3, 144.3) | 160.3 (159.2, 161.5) | 160.4 (159.0, 161.9) |
| urban-rural difference | 1.5 (0.4, 2.6)           | 1.5 (0.1, 2.8)       | 1.5 (0.4, 2.6)       | 1.5 (0.4, 2.7)       | 1.6 (0.3, 2.9)       | 0.1 (-0.8, 1.0)          | 0.1 (-1.4, 1.3)      | 0.1 (-0.9, 1.0)      | 0.1 (-0.8, 1.0)      | 0.2 (-0.8, 1.2)      |
| Southeast Asia         |                          |                      |                      |                      |                      |                          |                      |                      |                      |                      |
| Brunei Darussalam      |                          |                      |                      |                      |                      |                          |                      |                      |                      |                      |
| rural                  | 135.6 (133.0, 138.3)     | 103.3 (100.1, 106.5) | 131.6 (129.1, 134.3) | 150.5 (147.3, 153.7) | 151.0 (147.0, 154.9) | 139.5 (137.8, 141.2)     | 107.6 (104.3, 111.1) | 135.7 (133.8, 137.7) | 154.0 (152.5, 155.4) | 154.1 (152.6, 155.8) |
| urban                  | 137.4 (134.8, 140.0)     | 105.7 (102.6, 108.9) | 133.6 (131.1, 136.2) | 151.9 (148.9, 155.1) | 152.2 (148.2, 156.1) | 140.5 (139.0, 142.1)     | 109.3 (106.0, 112.7) | 137.0 (135.2, 138.8) | 154.7 (153.4, 156.1) | 154.6 (153.3, 156.1) |
| urban-rural difference | 1.8 (0.7, 2.9)           | 2.4 (1.0, 3.8)       | 2.0 (0.8, 3.1)       | 1.5 (0.3, 2.6)       | 1.2 (-0.1, 2.5)      | 1.0 (0.0, 2.1)           | 1.7 (0.3, 3.1)       | 1.2 (0.1, 2.3)       | 0.7 (-0.3, 1.8)      | 0.5 (-0.6, 1.6)      |
| Cambodia               |                          |                      |                      |                      |                      |                          |                      |                      |                      |                      |
| rural                  | 134.6 (132.7, 136.6)     | 101.4 (97.1, 105.5)  | 129.7 (127.4, 131.9) | 150.1 (148.2, 151.9) | 152.4 (150.3, 154.5) | 138.3 (135.8, 140.8)     | 106.4 (100.9, 111.8) | 133.8 (130.8, 136.8) | 153.1 (151.3, 154.9) | 154.5 (152.9, 156.2) |
| urban                  | 136.8 (134.8, 138.8)     | 104.2 (99.9, 108.4)  | 132.0 (129.6, 134.2) | 151.9 (150.0, 153.7) | 153.9 (151.8, 156.0) | 139.8 (137.3, 142.3)     | 108.6 (103.0, 114.0) | 135.5 (132.5, 138.5) | 154.3 (152.5, 156.1) | 155.3 (153.7, 157.0) |
| urban-rural difference | 2.1 (1.3, 3.0)           | 2.8 (1.4, 4.2)       | 2.3 (1.3, 3.3)       | 1.8 (1.1, 2.6)       | 1.4 (0.6, 2.3)       | 1.5 (0.6, 2.4)           | 2.1 (0.7, 3.6)       | 1.7 (0.6, 2.7)       | 1.2 (0.4, 1.9)       | 0.8 (0.0, 1.6)       |
| Indonesia              |                          |                      |                      |                      |                      |                          |                      |                      |                      |                      |
| rural                  | 132.9 (131.7, 134.0)     | 101.3 (100.0, 102.5) | 127.8 (126.6, 128.9) | 147.9 (146.6, 149.2) | 149.8 (148.3, 151.2) | 137.1 (136.1, 138.2)     | 106.0 (104.1, 107.8) | 132.4 (131.2, 133.6) | 151.9 (151.0, 152.9) | 153.2 (152.2, 154.3) |
| urban                  | 135.5 (134.3, 136.6)     | 104.3 (103.1, 105.6) | 130.5 (129.3, 131.7) | 150.3 (149.1, 151.6) | 152.0 (150.5, 153.4) | 139.1 (138.0, 140.1)     | 108.3 (106.5, 110.2) | 134.4 (133.3, 135.6) | 153.7 (152.7, 154.6) | 154.7 (153.7, 155.7) |
| urban-rural difference | 2.6 (2.1, 3.1)           | 3.1 (2.4, 3.7)       | 2.7 (2.2, 3.3)       | 2.4 (1.8, 3.0)       | 2.2 (1.5, 2.8)       | 1.9 (1.4, 2.4)           | 2.4 (1.7, 3.0)       | 2.0 (1.5, 2.6)       | 1.7 (1.2, 2.2)       | 1.5 (0.9, 2.1)       |
| Lao PDR                |                          |                      |                      |                      |                      |                          |                      |                      |                      |                      |
| rural                  | 134.1 (131.3, 137.0)     | 101.5 (97.0, 106.1)  | 129.6 (126.4, 132.8) | 149.3 (146.3, 152.3) | 150.6 (147.3, 154.0) | 137.5 (134.3, 140.6)     | 106.1 (100.3, 112.0) | 133.4 (129.6, 137.0) | 152.0 (149.4, 154.5) | 152.5 (150.5, 154.6) |
| urban                  | 136.9 (134.1, 139.8)     | 104.7 (100.3, 109.3) | 132.5 (129.3, 135.7) | 151.9 (148.9, 154.9) | 153.0 (149.6, 156.4) | 139.5 (136.4, 142.7)     | 108.6 (102.8, 114.5) | 135.6 (131.8, 139.3) | 153.9 (151.4, 156.4) | 154.2 (152.1, 156.4) |
| urban-rural difference | 2.8 (1.6, 3.9)           | 3.2 (1.7, 4.7)       | 2.9 (1.7, 4.1)       | 2.6 (1.4, 3.7)       | 2.4 (1.1, 3.6)       | 2.1 (0.9, 3.3)           | 2.5 (1.0, 4.1)       | 2.2 (1.0, 3.5)       | 1.9 (0.7, 3.0)       | 1.7 (0.4, 2.9)       |
| Malaysia               |                          |                      |                      |                      |                      |                          |                      |                      |                      |                      |
| rural                  | 138.3 (137.0, 139.6)     | 106.0 (104.2, 107.9) | 134.4 (132.9, 135.8) | 153.0 (151.6, 154.4) | 153.7 (152.2, 155.3) | 140.5 (139.4, 141.5)     | 108.5 (107.0, 110.1) | 136.7 (135.5, 137.8) | 155.0 (153.9, 156.0) | 155.6 (154.4, 156.8) |
| urban                  | 140.6 (139.4, 141.9)     | 108.7 (106.9, 110.5) | 136.8 (135.4, 138.3) | 155.1 (153.7, 156.5) | 155.7 (154.2, 157.2) | 142.1 (141.0, 143.1)     | 110.5 (108.9, 112.0) | 138.4 (137.2, 139.5) | 156.4 (155.4, 157.4) | 156.7 (155.7, 157.9) |
| urban-rural difference | 2.3 (1.7, 3.0)           | 2.7 (1.9, 3.6)       | 2.4 (1.8, 3.1)       | 2.1 (1.5, 2.8)       | 1.9 (1.2, 2.7)       | 1.6 (1.1, 2.1)           | 2.0 (1.2, 2.7)       | 1.7 (1.2, 2.2)       | 1.4 (0.9, 1.9)       | 1.2 (0.6, 1.8)       |
| Maldives               |                          |                      |                      |                      |                      |                          |                      |                      |                      |                      |
| rural                  | 134.8 (132.5, 137.1)     | 102.5 (97.9, 107.0)  | 130.4 (127.6, 133.2) | 149.9 (147.7, 152.0) | 150.5 (148.2, 152.9) | 138.9 (136.6, 141.3)     | 107.2 (101.9, 112.6) | 134.9 (132.0, 137.7) | 153.7 (152.0, 155.4) | 153.9 (152.3, 155.6) |
| urban                  | 137.1 (134.7, 139.4)     | 105.4 (100.8, 110.0) | 132.9 (130.1, 135.7) | 151.8 (149.7, 154.0) | 152.2 (149.9, 154.5) | 140.5 (138.1, 142.8)     | 109.4 (104.2, 114.7) | 136.6 (133.7, 139.5) | 155.0 (153.3, 156.7) | 154.9 (153.4, 156.5) |
| urban-rural difference | 2.3 (1.2, 3.4)           | 2.9 (1.4, 4.4)       | 2.4 (1.3, 3.7)       | 2.0 (0.9, 3.1)       | 1.7 (0.5, 2.9)       | 1.6 (0.6, 2.6)           | 2.2 (0.7, 3.8)       | 1.8 (0.6, 2.9)       | 1.3 (0.3, 2.3)       | 1.0 (0.0, 2.1)       |
| Myanmar                |                          |                      |                      |                      |                      |                          |                      |                      |                      |                      |
| rural                  | 135.0 (132.5, 137.5)     | 102.0 (97.5, 106.5)  | 130.2 (127.4, 133.0) | 150.3 (147.7, 153.0) | 152.6 (149.5, 155.8) | 138.2 (135.7, 140.6)     | 106.2 (100.7, 111.4) | 133.7 (130.7, 136.6) | 152.9 (151.2, 154.6) | 154.5 (152.9, 156.2) |
| urban                  | 137.0 (134.4, 139.6)     | 104.7 (100.2, 109.2) | 132.3 (129.5, 135.2) | 152.0 (149.4, 154.6) | 153.8 (150.7, 157.1) | 139.5 (137.0, 141.9)     | 108.3 (102.8, 113.6) | 135.3 (132.3, 138.1) | 153.9 (152.2, 155.6) | 155.1 (153.5, 156.8) |
| urban-rural difference | 2.0 (0.9, 3.0)           | 2.7 (1.2, 4.2)       | 2.2 (1.0, 3.3)       | 1.6 (0.7, 2.6)       | 1.2 (0.2, 2.2)       | 1.3 (0.4, 2.3)           | 2.1 (0.6, 3.6)       | 1.5 (0.4, 2.6)       | 1.0 (0.1, 1.8)       | 0.6 (-0.3, 1.5)      |
| Philippines            |                          |                      |                      |                      |                      |                          |                      |                      |                      |                      |
| rural                  | 133.6 (132.2, 135.0)     | 101.3 (99.8, 102.8)  | 129.1 (127.7, 130.5) | 148.5 (146.9, 150.1) | 149.8 (147.6, 151.9) | 137.2 (136.2, 138.3)     | 105.1 (103.3, 106.9) | 132.9 (131.8, 134.0) | 152.1 (151.2, 153.0) | 153.2 (152.2, 154.4) |
| urban                  | 135.8 (134.5, 137.2)     | 104.3 (102.8, 105.8) | 131.6 (130.2, 132.9) | 150.4 (148.8, 152.0) | 151.3 (149.1, 153.4) | 138.9 (137.9, 139.9)     | 107.5 (105.6, 109.3) | 134.7 (133.6, 135.9) | 153.4 (152.4, 154.4) | 154.1 (153.0, 155.2) |
| urban-rural difference | 2.2 (1.6, 2.9)           | 3.0 (2.2, 3.8)       | 2.4 (1.7, 3.1)       | 1.9 (1.2, 2.6)       | 1.5 (0.7, 2.3)       | 1.6 (1.1, 2.2)           | 2.3 (1.7, 3.0)       | 1.8 (1.3, 2.4)       | 1.3 (0.8, 1.9)       | 0.9 (0.3, 1.6)       |
| Thailand               |                          |                      |                      |                      |                      |                          |                      |                      |                      |                      |
| rural                  | 137.7 (136.7, 138.9)     | 104.5 (103.2, 105.8) | 133.1 (132.0, 134.3) | 153.2 (152.0, 154.5) | 154.4 (153.1, 155.7) | 143.6 (142.5, 144.8)     | 111.3 (109.0, 113.7) | 139.5 (138.2, 140.8) | 158.6 (157.6, 159.6) | 158.8 (157.8, 160.0) |
| urban                  | 139.8 (138.7, 141.0)     | 107.3 (106.0, 108.7) | 135.4 (134.2, 136.6) | 155.0 (153.8, 156.3) | 155.8 (154.5, 157.2) | 144.9 (143.8, 146.1)     | 113.3 (111.1, 115.8) | 141.0 (139.7, 142.3) | 159.6 (158.5, 160.6) | 159.5 (158.4, 160.6) |
| urban-rural difference | 2.1 (1.5, 2.7)           | 2.8 (2.0, 3.6)       | 2.3 (1.7, 2.9)       | 1.8 (1.2, 2.4)       | 1.4 (0.7, 2.2)       | 1.3 (0.6, 2.0)           | 2.0 (1.1, 2.9)       | 1.5 (0.7, 2.2)       | 1.0 (0.3, 1.7)       | 0.6 (-0.1, 1.4)      |
| Timor-Leste            |                          |                      |                      |                      |                      |                          |                      |                      |                      |                      |
| rural                  | 131.6 (129.1, 134.1)     | 97.9 (94.9, 100.9)   | 126.2 (123.8, 128.7) | 147.2 (144.2, 150.2) | 150.5 (146.9, 154.3) | 135.1 (133.7, 136.5)     | 103.1 (100.9, 105.4) | 130.3 (128.7, 131.9) | 149.9 (148.6, 151.3) | 152.4 (150.9, 153.8) |
| urban                  | 134.1 (131.7, 136.7)     | 101.2 (98.0, 104.3)  | 129.0 (126.5, 131.5) | 149.5 (146.6, 152.5) | 152.4 (148.8, 156.3) | 137.0 (135.5, 138.5)     | 105.7 (103.1, 108.3) | 132.4 (130.6, 134.2) | 151.5 (150.1, 153.0) | 153.6 (152.0, 155.1) |
| urban-rural difference | 2.6 (1.5, 3.6)           | 3.2 (1.7, 4.6)       | 2.8 (1.6, 3.8)       | 2.3 (1.3, 3.2)       | 1.9 (0.8, 3.0)       | 1.9 (0.9, 2.8)           | 2.5 (1.0, 4.0)       | 2.1 (1.0, 3.1)       | 1.6 (0.8, 2.4)       | 1.2 (0.3, 2.1)       |
| Viet Nam               |                          |                      |                      |                      |                      |                          |                      |                      |                      |                      |
| rural                  | 133.4 (132.5, 134.4)     | 100.5 (99.3, 101.7)  | 127.8 (126.7, 128.9) | 149.0 (147.9, 150.1) | 152.6 (151.3, 153.8) | 141.1 (139.8, 142.5)     | 109.0 (106.3, 111.9) | 136.1 (134.5, 137.8) | 156.1 (155.0, 157.2) | 158.6 (157.4, 159.8) |

| Girls                                         | Mean height in 1990 (cm) |                      |                      |                      |                      | Mean height in 2020 (cm) |                      |                      |                      |                      |
|-----------------------------------------------|--------------------------|----------------------|----------------------|----------------------|----------------------|--------------------------|----------------------|----------------------|----------------------|----------------------|
|                                               | Age-standardised         | 5 years              | 10 years             | 15 years             | 19 years             | Age-standardised         | 5 years              | 10 years             | 15 years             | 19 years             |
| urban                                         | 136.4 (135.4, 137.4)     | 104.8 (103.6, 106.0) | 131.1 (130.0, 132.2) | 151.3 (150.2, 152.5) | 154.2 (152.9, 155.4) | 143.3 (142.0, 144.8)     | 112.6 (109.8, 115.4) | 138.7 (137.1, 140.4) | 157.8 (156.7, 158.9) | 159.5 (158.3, 160.7) |
| urban-rural difference                        | 2.9 (2.4, 3.5)           | 4.3 (3.6, 5.0)       | 3.3 (2.8, 3.9)       | 2.4 (1.8, 2.9)       | 1.6 (1.0, 2.2)       | 2.2 (1.6, 2.8)           | 3.6 (2.7, 4.4)       | 2.6 (2.0, 3.2)       | 1.6 (1.0, 2.3)       | 0.9 (0.2, 1.6)       |
| <b>High-income Asia Pacific</b>               |                          |                      |                      |                      |                      |                          |                      |                      |                      |                      |
| Japan                                         |                          |                      |                      |                      |                      |                          |                      |                      |                      |                      |
| rural                                         | 142.2 (141.8, 142.5)     | 108.9 (108.5, 109.4) | 139.2 (138.8, 139.5) | 156.4 (156.0, 156.8) | 157.1 (156.7, 157.6) | 142.8 (142.3, 143.2)     | 109.6 (108.9, 110.4) | 139.8 (139.3, 140.3) | 157.0 (156.6, 157.4) | 157.7 (157.2, 158.2) |
| urban                                         | 142.3 (142.0, 142.6)     | 108.8 (108.4, 109.2) | 139.2 (138.8, 139.6) | 156.7 (156.3, 157.0) | 157.6 (157.1, 158.0) | 143.0 (142.6, 143.4)     | 109.6 (108.9, 110.3) | 140.0 (139.5, 140.4) | 157.4 (157.0, 157.8) | 158.2 (157.8, 158.7) |
| urban-rural difference                        | 0.1 (-0.1, 0.4)          | -0.2 (-0.4, 0.1)     | 0.0 (-0.2, 0.3)      | 0.3 (0.0, 0.5)       | 0.4 (0.1, 0.8)       | 0.2 (0.0, 0.5)           | 0.0 (-0.4, 0.3)      | 0.2 (-0.1, 0.4)      | 0.4 (0.1, 0.7)       | 0.5 (0.2, 0.9)       |
| Singapore                                     |                          |                      |                      |                      |                      |                          |                      |                      |                      |                      |
| rural                                         | 143.1 (139.2, 147.0)     | 109.2 (103.3, 115.2) | 139.8 (135.3, 144.4) | 157.6 (153.6, 161.4) | 159.3 (155.4, 163.2) | 144.7 (140.7, 148.9)     | 111.1 (104.3, 118.0) | 141.5 (136.6, 146.5) | 159.0 (155.5, 162.6) | 160.6 (157.9, 163.3) |
| urban                                         | 143.8 (140.1, 147.5)     | 110.0 (104.1, 115.9) | 140.5 (136.1, 145.0) | 158.2 (154.6, 161.7) | 159.9 (156.6, 163.3) | 145.3 (141.5, 149.3)     | 111.9 (105.0, 118.7) | 142.1 (137.4, 147.0) | 159.6 (156.4, 162.8) | 161.2 (159.2, 163.1) |
| urban-rural difference                        | 0.7 (-0.9, 2.3)          | 0.8 (-0.9, 2.6)      | 0.7 (-0.9, 2.3)      | 0.7 (-1.1, 2.4)      | 0.6 (-1.4, 2.6)      | 0.7 (-0.9, 2.3)          | 0.7 (-1.1, 2.6)      | 0.7 (-0.9, 2.3)      | 0.6 (-1.1, 2.3)      | 0.6 (-1.3, 2.5)      |
| South Korea                                   |                          |                      |                      |                      |                      |                          |                      |                      |                      |                      |
| rural                                         | 142.9 (142.0, 143.8)     | 109.7 (108.7, 110.7) | 140.1 (139.2, 141.1) | 157.1 (156.1, 158.1) | 157.5 (156.2, 158.7) | 146.2 (145.6, 146.9)     | 112.0 (111.0, 113.0) | 143.0 (142.4, 143.7) | 160.9 (160.3, 161.6) | 162.0 (161.3, 162.7) |
| urban                                         | 143.5 (142.6, 144.3)     | 110.3 (109.3, 111.2) | 140.7 (139.8, 141.6) | 157.7 (156.7, 158.6) | 158.0 (156.9, 159.2) | 146.8 (146.2, 147.4)     | 112.6 (111.6, 113.5) | 143.6 (143.0, 144.3) | 161.5 (160.9, 162.1) | 162.6 (161.9, 163.3) |
| urban-rural difference                        | 0.6 (0.0, 1.1)           | 0.6 (-0.1, 1.3)      | 0.6 (0.0, 1.2)       | 0.6 (0.0, 1.1)       | 0.6 (-0.1, 1.2)      | 0.6 (0.2, 1.0)           | 0.6 (0.1, 1.1)       | 0.6 (0.2, 1.0)       | 0.6 (0.2, 1.0)       | 0.6 (0.1, 1.1)       |
| <b>High-income western</b>                    |                          |                      |                      |                      |                      |                          |                      |                      |                      |                      |
| <i>High-income English-speaking countries</i> |                          |                      |                      |                      |                      |                          |                      |                      |                      |                      |
| Australia                                     |                          |                      |                      |                      |                      |                          |                      |                      |                      |                      |
| rural                                         | 146.6 (145.6, 147.6)     | 111.7 (110.5, 112.9) | 142.1 (141.1, 143.1) | 162.9 (161.7, 164.0) | 163.4 (161.9, 165.0) | 148.6 (147.5, 149.6)     | 114.1 (111.9, 116.4) | 144.2 (142.9, 145.5) | 164.6 (163.8, 165.5) | 165.0 (164.2, 166.0) |
| urban                                         | 146.6 (145.7, 147.5)     | 112.0 (110.9, 113.2) | 142.2 (141.1, 143.2) | 162.6 (161.5, 163.8) | 163.0 (161.5, 164.6) | 148.6 (147.6, 149.6)     | 114.5 (112.3, 116.7) | 144.3 (143.1, 145.5) | 164.4 (163.6, 165.3) | 164.7 (163.9, 165.5) |
| urban-rural difference                        | 0.0 (-0.7, 0.6)          | 0.3 (-0.4, 1.1)      | 0.1 (-0.6, 0.7)      | -0.2 (-0.9, 0.5)     | -0.4 (-1.2, 0.4)     | 0.0 (-0.5, 0.5)          | 0.4 (-0.4, 1.0)      | 0.1 (-0.4, 0.6)      | -0.2 (-0.7, 0.3)     | -0.4 (-1.0, 0.2)     |
| Canada                                        |                          |                      |                      |                      |                      |                          |                      |                      |                      |                      |
| rural                                         | 147.7 (146.4, 149.1)     | 112.2 (110.1, 114.4) | 143.3 (141.6, 145.0) | 164.1 (162.6, 165.6) | 164.7 (163.0, 166.5) | 148.8 (147.4, 150.2)     | 112.6 (110.6, 114.6) | 144.3 (142.8, 145.8) | 165.4 (164.0, 166.8) | 165.9 (164.4, 167.5) |
| urban                                         | 146.8 (145.7, 148.0)     | 111.9 (110.0, 113.8) | 142.5 (141.2, 144.0) | 162.9 (161.6, 164.2) | 163.3 (161.7, 164.9) | 147.9 (146.9, 149.0)     | 112.3 (110.7, 113.8) | 143.6 (142.5, 144.8) | 164.3 (163.2, 165.4) | 164.6 (163.5, 165.7) |
| urban-rural difference                        | -0.9 (-2.1, 0.3)         | -0.4 (-1.9, 1.2)     | -0.8 (-2.0, 0.5)     | -1.2 (-2.4, 0.0)     | -1.4 (-2.7, -0.1)    | -0.9 (-2.1, 0.4)         | -0.3 (-1.9, 1.3)     | -0.7 (-2.0, 0.6)     | -1.1 (-2.3, 0.1)     | -1.4 (-2.7, -0.1)    |
| Ireland                                       |                          |                      |                      |                      |                      |                          |                      |                      |                      |                      |
| rural                                         | 145.6 (144.0, 147.2)     | 111.9 (110.2, 113.6) | 140.9 (139.3, 142.6) | 161.3 (159.3, 163.3) | 162.7 (160.4, 165.0) | 147.0 (146.2, 147.8)     | 112.8 (111.4, 114.2) | 142.2 (141.3, 143.1) | 162.8 (161.8, 163.8) | 164.6 (163.3, 166.0) |
| urban                                         | 146.0 (144.5, 147.6)     | 112.5 (110.8, 114.3) | 141.4 (139.8, 143.1) | 161.6 (159.7, 163.6) | 163.0 (160.7, 165.3) | 147.4 (146.7, 148.2)     | 113.4 (112.1, 114.8) | 142.7 (141.8, 143.6) | 163.2 (162.2, 164.2) | 164.9 (163.6, 166.2) |
| urban-rural difference                        | 0.4 (-0.4, 1.3)          | 0.6 (-0.3, 1.5)      | 0.5 (-0.3, 1.3)      | 0.4 (-0.5, 1.3)      | 0.3 (-0.8, 1.4)      | 0.5 (-0.1, 1.0)          | 0.6 (-0.1, 1.3)      | 0.5 (0.0, 1.0)       | 0.4 (-0.3, 1.1)      | 0.3 (-0.6, 1.2)      |
| New Zealand                                   |                          |                      |                      |                      |                      |                          |                      |                      |                      |                      |
| rural                                         | 148.1 (146.9, 149.2)     | 112.7 (111.1, 114.2) | 143.5 (142.2, 144.8) | 164.4 (163.1, 165.6) | 165.5 (164.0, 167.1) | 149.0 (148.3, 149.8)     | 113.6 (112.5, 114.7) | 144.5 (143.7, 145.4) | 165.3 (164.5, 166.1) | 166.3 (165.3, 167.2) |
| urban                                         | 147.3 (146.2, 148.4)     | 112.4 (111.0, 113.8) | 142.9 (141.7, 144.1) | 163.4 (162.2, 164.6) | 164.3 (162.8, 165.8) | 148.3 (147.6, 149.0)     | 113.4 (112.3, 114.4) | 143.9 (143.2, 144.7) | 164.3 (163.6, 165.1) | 165.0 (164.1, 165.8) |
| urban-rural difference                        | -0.7 (-1.4, 0.0)         | -0.2 (-1.1, 0.6)     | -0.6 (-1.3, 0.1)     | -1.0 (-1.6, -0.2)    | -1.3 (-2.1, -0.4)    | -0.8 (-1.2, -0.3)        | -0.2 (-0.9, 0.5)     | -0.6 (-1.1, -0.1)    | -1.0 (-1.5, -0.5)    | -1.3 (-1.9, -0.6)    |
| United Kingdom                                |                          |                      |                      |                      |                      |                          |                      |                      |                      |                      |
| rural                                         | 147.0 (146.3, 147.5)     | 111.7 (111.0, 112.4) | 142.5 (141.8, 143.1) | 163.1 (162.4, 163.7) | 164.2 (163.4, 164.9) | 147.0 (146.5, 147.6)     | 111.3 (110.3, 112.3) | 142.5 (141.9, 143.1) | 163.4 (162.8, 163.9) | 164.4 (163.8, 165.0) |
| urban                                         | 146.3 (145.8, 146.9)     | 111.5 (110.8, 112.2) | 141.9 (141.3, 142.6) | 162.3 (161.6, 162.9) | 163.2 (162.4, 163.9) | 146.6 (146.1, 147.1)     | 111.3 (110.4, 112.3) | 142.2 (141.6, 142.7) | 162.8 (162.3, 163.3) | 163.6 (163.0, 164.2) |
| urban-rural difference                        | -0.6 (-1.1, -0.2)        | -0.3 (-0.8, 0.2)     | -0.5 (-1.0, -0.1)    | -0.8 (-1.2, -0.4)    | -1.0 (-1.5, -0.6)    | -0.4 (-0.8, 0.0)         | 0.0 (-0.4, 0.4)      | -0.3 (-0.7, 0.1)     | -0.6 (-1.0, -0.2)    | -0.8 (-1.3, -0.3)    |
| United States of America                      |                          |                      |                      |                      |                      |                          |                      |                      |                      |                      |
| rural                                         | 146.7 (145.9, 147.4)     | 112.5 (111.6, 113.3) | 142.4 (141.6, 143.2) | 162.2 (161.4, 163.0) | 163.3 (162.3, 164.4) | 147.0 (146.3, 147.8)     | 112.8 (111.4, 114.2) | 143.1 (142.3, 143.9) | 162.6 (161.9, 163.3) | 163.1 (162.2, 164.1) |
| urban                                         | 146.6 (145.8, 147.3)     | 112.8 (111.9, 113.6) | 142.4 (141.6, 143.2) | 162.0 (161.1, 162.8) | 162.9 (161.8, 163.9) | 146.8 (146.1, 147.4)     | 112.9 (111.6, 114.2) | 142.9 (142.1, 143.7) | 162.2 (161.5, 162.8) | 162.5 (161.7, 163.3) |
| urban-rural difference                        | -0.1 (-0.6, 0.5)         | 0.3 (-0.3, 1.0)      | 0.0 (-0.5, 0.6)      | -0.2 (-0.9, 0.5)     | -0.5 (-1.3, 0.4)     | -0.3 (-0.8, 0.2)         | 0.1 (-0.5, 0.7)      | -0.2 (-0.7, 0.3)     | -0.4 (-1.1, 0.2)     | -0.6 (-1.5, 0.2)     |
| <i>Northwestern Europe</i>                    |                          |                      |                      |                      |                      |                          |                      |                      |                      |                      |
| Austria                                       |                          |                      |                      |                      |                      |                          |                      |                      |                      |                      |
| rural                                         | 150.5 (148.7, 152.4)     | 117.5 (115.2, 119.9) | 146.4 (144.4, 148.5) | 165.7 (163.9, 167.5) | 166.0 (163.9, 168.1) | 148.3 (147.2, 149.4)     | 114.7 (112.9, 116.5) | 144.0 (142.8, 145.2) | 163.8 (162.5, 165.0) | 164.4 (163.1, 165.8) |
| urban                                         | 150.6 (148.9, 152.4)     | 118.1 (115.9, 120.5) | 146.7 (144.7, 148.7) | 165.4 (163.7, 167.2) | 165.7 (163.6, 167.8) | 147.8 (146.7, 148.8)     | 114.7 (113.0, 116.6) | 143.7 (142.5, 144.8) | 162.9 (161.6, 164.2) | 163.4 (162.3, 164.7) |
| urban-rural difference                        | 0.1 (-0.8, 1.1)          | 0.6 (-0.4, 1.7)      | 0.3 (-0.7, 1.2)      | -0.3 (-1.3, 0.8)     | -0.3 (-1.5, 0.9)     | -0.5 (-1.2, 0.2)         | 0.0 (-0.9, 0.9)      | -0.4 (-1.1, 0.4)     | -0.9 (-1.8, 0.0)     | -0.9 (-1.9, -0.1)    |
| Belgium                                       |                          |                      |                      |                      |                      |                          |                      |                      |                      |                      |
| rural                                         | 149.5 (147.8, 151.3)     | 117.5 (115.2, 119.9) | 146.0 (144.1, 147.9) | 164.0 (162.1, 165.9) | 163.9 (161.7, 166.1) | 147.7 (145.8, 149.6)     | 112.9 (110.0, 115.8) | 143.4 (141.2, 145.6) | 163.4 (161.5, 165.3) | 164.8 (162.9, 166.6) |
| urban                                         | 148.8 (146.8, 150.8)     | 116.3 (113.9, 118.7) | 145.1 (143.0, 147.2) | 163.5 (161.3, 165.8) | 163.6 (161.1, 166.1) | 146.3 (144.7, 147.8)     | 111.0 (108.6, 113.4) | 141.8 (140.0, 143.6) | 162.2 (160.6, 163.8) | 163.8 (162.3, 165.4) |
| urban-rural difference                        | -0.8 (-2.1, 0.5)         | -1.2 (-2.8, 0.3)     | -0.9 (-2.3, 0.4)     | -0.5 (-1.9, 0.9)     | -0.3 (-1.8, 1.3)     | -1.4 (-2.8, -0.2)        | -1.9 (-3.5, -0.3)    | -1.6 (-2.9, -0.2)    | -1.2 (-2.6, 0.2)     | -1.0 (-2.5, 0.5)     |
| Denmark                                       |                          |                      |                      |                      |                      |                          |                      |                      |                      |                      |

| Girls                      | Mean height in 1990 (cm) |                      |                      |                      |                      | Mean height in 2020 (cm) |                      |                      |                      |                      |
|----------------------------|--------------------------|----------------------|----------------------|----------------------|----------------------|--------------------------|----------------------|----------------------|----------------------|----------------------|
|                            | Age-standardised         | 5 years              | 10 years             | 15 years             | 19 years             | Age-standardised         | 5 years              | 10 years             | 15 years             | 19 years             |
| rural                      | 148.1 (146.9, 149.2)     | 114.5 (113.1, 115.8) | 142.6 (141.4, 143.8) | 163.8 (162.4, 165.0) | 167.2 (165.6, 168.9) | 150.6 (149.5, 151.7)     | 116.9 (114.9, 118.7) | 145.2 (144.1, 146.4) | 166.4 (165.2, 167.6) | 169.7 (168.2, 171.1) |
| urban                      | 148.1 (147.5, 148.8)     | 114.6 (113.7, 115.5) | 142.7 (142.0, 143.5) | 163.8 (163.0, 164.7) | 167.3 (166.1, 168.6) | 150.1 (149.1, 151.1)     | 116.4 (114.5, 118.2) | 144.7 (143.6, 145.9) | 165.9 (164.8, 166.9) | 169.2 (168.0, 170.3) |
| urban-rural difference     | 0.1 (-0.8, 1.0)          | 0.1 (-1.0, 1.1)      | 0.1 (-0.8, 1.0)      | 0.1 (-0.9, 1.1)      | 0.1 (-1.1, 1.3)      | -0.5 (-1.2, 0.3)         | -0.5 (-1.4, 0.4)     | -0.5 (-1.2, 0.2)     | -0.5 (-1.3, 0.3)     | -0.5 (-1.5, 0.6)     |
| <b>Finland</b>             |                          |                      |                      |                      |                      |                          |                      |                      |                      |                      |
| rural                      | 147.4 (146.5, 148.3)     | 112.2 (110.5, 113.8) | 143.0 (141.8, 144.2) | 163.5 (162.4, 164.5) | 164.9 (163.6, 166.2) | 148.0 (146.8, 149.2)     | 111.4 (109.9, 113.0) | 143.3 (142.0, 144.5) | 164.6 (163.4, 165.9) | 166.5 (165.1, 168.0) |
| urban                      | 148.1 (147.2, 149.0)     | 112.8 (111.2, 114.5) | 143.6 (142.5, 144.8) | 164.1 (163.1, 165.2) | 165.5 (164.3, 166.7) | 148.0 (147.0, 149.0)     | 111.5 (110.1, 112.8) | 143.3 (142.2, 144.4) | 164.6 (163.5, 165.7) | 166.6 (165.2, 167.9) |
| urban-rural difference     | 0.6 (0.0, 1.3)           | 0.7 (-0.2, 1.5)      | 0.6 (-0.1, 1.3)      | 0.6 (-0.1, 1.4)      | 0.6 (-0.2, 1.5)      | 0.0 (-0.8, 0.9)          | 0.0 (-0.9, 1.1)      | 0.0 (-0.8, 0.9)      | 0.0 (-0.8, 0.9)      | 0.0 (-1.0, 1.0)      |
| <b>Germany</b>             |                          |                      |                      |                      |                      |                          |                      |                      |                      |                      |
| rural                      | 148.6 (146.9, 150.2)     | 113.8 (111.7, 116.0) | 144.0 (142.2, 145.9) | 164.7 (162.8, 166.5) | 165.8 (164.0, 167.6) | 148.6 (147.1, 150.1)     | 113.0 (110.8, 115.2) | 143.8 (142.1, 145.4) | 165.0 (163.5, 166.6) | 166.6 (164.8, 168.4) |
| urban                      | 148.9 (147.3, 150.5)     | 114.4 (112.3, 116.4) | 144.4 (142.6, 146.2) | 164.8 (163.0, 166.6) | 165.8 (164.1, 167.6) | 148.3 (146.8, 149.7)     | 113.0 (110.8, 115.1) | 143.6 (141.9, 145.1) | 164.6 (163.1, 166.1) | 166.0 (164.3, 167.8) |
| urban-rural difference     | 0.3 (-0.5, 1.1)          | 0.6 (-0.5, 1.6)      | 0.4 (-0.5, 1.2)      | 0.2 (-0.7, 1.0)      | 0.0 (-1.0, 1.0)      | -0.3 (-1.0, 0.5)         | 0.0 (-1.0, 1.0)      | -0.2 (-1.0, 0.6)     | -0.4 (-1.2, 0.4)     | -0.6 (-1.5, 0.4)     |
| <b>Greenland</b>           |                          |                      |                      |                      |                      |                          |                      |                      |                      |                      |
| rural                      | 144.7 (141.2, 148.2)     | 112.1 (106.9, 117.5) | 140.9 (136.8, 145.0) | 159.4 (156.1, 162.7) | 159.6 (155.7, 163.4) | 145.3 (141.5, 149.1)     | 112.3 (105.8, 118.6) | 141.4 (136.9, 145.9) | 160.3 (157.2, 163.3) | 160.6 (158.0, 163.2) |
| urban                      | 145.4 (141.9, 149.0)     | 112.6 (107.5, 118.0) | 141.5 (137.5, 145.7) | 160.2 (156.9, 163.4) | 160.5 (156.7, 164.3) | 145.4 (141.6, 149.1)     | 112.2 (105.7, 118.4) | 141.4 (136.9, 145.8) | 160.4 (157.4, 163.4) | 160.8 (158.2, 163.4) |
| urban-rural difference     | 0.7 (-0.6, 2.0)          | 0.5 (-1.1, 2.1)      | 0.7 (-0.7, 2.0)      | 0.8 (-0.6, 2.2)      | 0.9 (-0.6, 2.4)      | 0.1 (-1.3, 1.4)          | -0.1 (-1.9, 1.6)     | 0.0 (-1.4, 1.4)      | 0.2 (-1.2, 1.5)      | 0.2 (-1.2, 1.7)      |
| <b>Iceland</b>             |                          |                      |                      |                      |                      |                          |                      |                      |                      |                      |
| rural                      | 149.7 (145.9, 153.5)     | 115.6 (110.3, 121.0) | 144.9 (140.7, 149.2) | 165.5 (161.4, 169.4) | 167.7 (163.2, 172.2) | 149.8 (145.7, 154.1)     | 115.2 (108.7, 121.5) | 144.9 (140.2, 149.7) | 165.8 (161.9, 169.8) | 168.3 (164.4, 172.0) |
| urban                      | 150.0 (146.4, 153.7)     | 115.9 (110.6, 121.4) | 145.2 (141.1, 149.5) | 165.7 (161.9, 169.6) | 168.0 (163.7, 172.1) | 149.5 (145.4, 153.6)     | 114.9 (108.4, 121.1) | 144.5 (139.8, 149.3) | 165.4 (161.6, 169.2) | 167.9 (164.5, 171.4) |
| urban-rural difference     | 0.3 (-1.2, 1.8)          | 0.3 (-1.4, 1.9)      | 0.3 (-1.2, 1.8)      | 0.3 (-1.3, 1.9)      | 0.3 (-1.6, 2.1)      | -0.3 (-1.9, 1.2)         | -0.3 (-2.1, 1.4)     | -0.3 (-1.9, 1.2)     | -0.3 (-1.9, 1.2)     | -0.3 (-2.1, 1.4)     |
| <b>Luxembourg</b>          |                          |                      |                      |                      |                      |                          |                      |                      |                      |                      |
| rural                      | 147.3 (143.9, 150.8)     | 112.8 (107.7, 118.0) | 142.4 (138.4, 146.4) | 163.2 (159.6, 166.7) | 166.1 (162.5, 169.7) | 146.6 (142.9, 150.4)     | 112.9 (106.7, 119.3) | 141.9 (137.4, 146.4) | 162.1 (158.9, 165.1) | 164.6 (162.2, 167.0) |
| urban                      | 147.4 (143.9, 150.7)     | 112.9 (107.8, 118.1) | 142.4 (138.4, 146.4) | 163.1 (159.6, 166.6) | 166.0 (162.4, 169.7) | 146.0 (142.4, 149.6)     | 112.4 (106.3, 118.7) | 141.3 (136.9, 145.7) | 161.4 (158.4, 164.4) | 163.9 (161.6, 166.2) |
| urban-rural difference     | 0.0 (-1.2, 1.2)          | 0.1 (-1.4, 1.6)      | 0.0 (-1.2, 1.3)      | 0.0 (-1.3, 1.2)      | -0.1 (-1.4, 1.3)     | -0.6 (-1.8, 0.6)         | -0.5 (-2.1, 1.1)     | -0.6 (-1.9, 0.7)     | -0.7 (-1.9, 0.5)     | -0.7 (-2.0, 0.6)     |
| <b>Netherlands</b>         |                          |                      |                      |                      |                      |                          |                      |                      |                      |                      |
| rural                      | 151.9 (150.0, 153.8)     | 119.1 (116.7, 121.6) | 147.1 (145.1, 149.1) | 167.4 (165.0, 169.7) | 168.7 (166.0, 171.3) | 151.4 (149.7, 153.2)     | 117.5 (114.3, 120.7) | 146.3 (144.2, 148.3) | 167.4 (165.7, 169.1) | 169.6 (167.3, 171.9) |
| urban                      | 151.7 (149.7, 153.5)     | 119.0 (116.6, 121.5) | 146.9 (144.8, 148.9) | 167.1 (164.8, 169.4) | 168.3 (165.8, 170.8) | 150.6 (148.9, 152.3)     | 116.9 (113.6, 120.1) | 145.5 (143.4, 147.6) | 166.6 (164.9, 168.2) | 168.7 (166.6, 170.8) |
| urban-rural difference     | -0.2 (-1.2, 0.7)         | -0.1 (-1.3, 1.0)     | -0.2 (-1.2, 0.7)     | -0.3 (-1.3, 0.7)     | -0.3 (-1.6, 0.9)     | -0.8 (-1.7, 0.1)         | -0.7 (-1.9, 0.5)     | -0.8 (-1.7, 0.2)     | -0.8 (-1.8, 0.1)     | -0.9 (-2.1, 0.3)     |
| <b>Norway</b>              |                          |                      |                      |                      |                      |                          |                      |                      |                      |                      |
| rural                      | 149.5 (147.8, 151.2)     | 115.0 (112.1, 117.7) | 144.8 (143.0, 146.6) | 165.7 (163.8, 167.5) | 166.5 (164.5, 168.4) | 149.5 (147.8, 151.2)     | 115.4 (112.2, 118.6) | 144.9 (143.0, 146.9) | 165.5 (163.7, 167.2) | 166.1 (164.1, 168.1) |
| urban                      | 149.9 (148.2, 151.7)     | 115.1 (112.3, 117.8) | 145.1 (143.3, 147.0) | 166.3 (164.3, 168.2) | 167.2 (165.1, 169.4) | 149.3 (147.8, 150.8)     | 114.9 (111.9, 118.0) | 144.6 (142.9, 146.4) | 165.4 (163.7, 167.0) | 166.1 (164.1, 168.3) |
| urban-rural difference     | 0.4 (-0.6, 1.5)          | 0.1 (-1.2, 1.4)      | 0.3 (-0.7, 1.4)      | 0.6 (-0.5, 1.7)      | 0.7 (-0.5, 2.0)      | -0.2 (-1.3, 0.8)         | -0.5 (-1.9, 0.9)     | -0.3 (-1.4, 0.8)     | -0.1 (-1.2, 1.0)     | 0.1 (-1.2, 1.3)      |
| <b>Sweden</b>              |                          |                      |                      |                      |                      |                          |                      |                      |                      |                      |
| rural                      | 148.8 (147.8, 149.8)     | 115.0 (113.4, 116.6) | 143.9 (142.8, 145.0) | 164.6 (163.4, 165.8) | 166.4 (164.5, 168.3) | 149.1 (147.7, 150.5)     | 114.9 (112.7, 117.1) | 144.1 (142.6, 145.6) | 165.1 (163.6, 166.7) | 167.1 (165.1, 169.1) |
| urban                      | 149.1 (148.6, 149.6)     | 115.3 (114.0, 116.5) | 144.2 (143.6, 145.0) | 164.9 (164.2, 165.6) | 166.7 (165.2, 168.2) | 148.8 (147.7, 149.9)     | 114.6 (112.6, 116.5) | 143.8 (142.5, 145.1) | 164.8 (163.5, 166.0) | 166.8 (165.1, 168.5) |
| urban-rural difference     | 0.3 (-0.8, 1.4)          | 0.3 (-1.0, 1.6)      | 0.3 (-0.8, 1.4)      | 0.3 (-0.9, 1.5)      | 0.3 (-1.1, 1.7)      | -0.3 (-1.4, 0.8)         | -0.3 (-1.6, 1.0)     | -0.3 (-1.5, 0.7)     | -0.3 (-1.5, 0.8)     | -0.3 (-1.7, 1.1)     |
| <b>Switzerland</b>         |                          |                      |                      |                      |                      |                          |                      |                      |                      |                      |
| rural                      | 147.1 (144.7, 149.4)     | 113.3 (111.5, 115.3) | 142.7 (140.5, 144.9) | 162.3 (159.2, 165.3) | 164.6 (160.6, 168.6) | 147.3 (146.1, 148.5)     | 113.6 (111.9, 115.4) | 142.9 (141.6, 144.1) | 162.5 (161.2, 163.9) | 164.8 (162.8, 166.9) |
| urban                      | 147.7 (145.4, 150.1)     | 113.4 (111.5, 115.2) | 143.1 (141.0, 145.3) | 163.2 (160.2, 166.2) | 165.8 (161.9, 169.7) | 147.3 (146.1, 148.4)     | 112.9 (111.3, 114.7) | 142.7 (141.4, 143.9) | 162.7 (161.4, 164.1) | 165.4 (163.5, 167.3) |
| urban-rural difference     | 0.6 (-0.2, 1.5)          | 0.0 (-0.9, 0.9)      | 0.4 (-0.4, 1.3)      | 0.9 (-0.1, 1.9)      | 1.2 (0.0, 2.5)       | -0.1 (-0.7, 0.6)         | -0.6 (-1.5, 0.1)     | -0.2 (-0.9, 0.4)     | 0.2 (-0.6, 1.0)      | 0.6 (-0.5, 1.7)      |
| <b>Southwestern Europe</b> |                          |                      |                      |                      |                      |                          |                      |                      |                      |                      |
| <b>Andorra</b>             |                          |                      |                      |                      |                      |                          |                      |                      |                      |                      |
| rural                      | 145.4 (140.0, 150.8)     | 112.4 (106.2, 118.5) | 141.3 (135.9, 146.7) | 160.3 (154.4, 166.0) | 161.7 (154.3, 169.5) | 146.8 (141.3, 152.3)     | 113.5 (106.8, 120.5) | 142.6 (137.1, 148.2) | 161.8 (156.0, 167.4) | 163.2 (156.4, 170.6) |
| urban                      | 146.2 (140.8, 151.6)     | 113.1 (106.9, 119.2) | 142.1 (136.8, 147.4) | 161.0 (155.1, 166.9) | 162.5 (155.0, 170.3) | 146.5 (140.9, 151.8)     | 113.2 (106.4, 120.1) | 142.3 (136.8, 147.8) | 161.5 (155.7, 167.1) | 162.9 (156.0, 170.2) |
| urban-rural difference     | 0.8 (-0.8, 2.3)          | 0.7 (-1.0, 2.5)      | 0.7 (-0.8, 2.3)      | 0.7 (-1.0, 2.4)      | 0.8 (-1.1, 2.6)      | -0.3 (-1.8, 1.2)         | -0.3 (-2.1, 1.4)     | -0.3 (-1.8, 1.2)     | -0.3 (-1.9, 1.2)     | -0.3 (-2.0, 1.4)     |
| <b>Cyprus</b>              |                          |                      |                      |                      |                      |                          |                      |                      |                      |                      |
| rural                      | 144.8 (142.1, 147.4)     | 111.8 (108.8, 114.7) | 141.0 (138.3, 143.6) | 159.6 (156.4, 162.8) | 160.2 (155.9, 164.9) | 146.6 (145.1, 148.1)     | 113.9 (111.7, 116.1) | 142.9 (141.2, 144.5) | 161.3 (159.4, 163.1) | 161.6 (159.2, 164.6) |
| urban                      | 145.4 (142.8, 148.1)     | 112.4 (109.6, 115.2) | 141.6 (139.1, 144.2) | 160.2 (157.1, 163.5) | 160.9 (156.6, 165.5) | 146.1 (144.8, 147.5)     | 113.4 (111.4, 115.4) | 142.4 (141.0, 143.9) | 160.9 (159.1, 162.6) | 161.3 (158.9, 164.2) |
| urban-rural difference     | 0.6 (-0.5, 1.8)          | 0.6 (-0.7, 1.9)      | 0.6 (-0.5, 1.8)      | 0.6 (-0.6, 1.9)      | 0.7 (-0.7, 2.1)      | -0.4 (-1.4, 0.5)         | -0.5 (-1.7, 0.8)     | -0.4 (-1.5, 0.6)     | -0.4 (-1.5, 0.6)     | -0.4 (-1.6, 0.8)     |
| <b>France</b>              |                          |                      |                      |                      |                      |                          |                      |                      |                      |                      |
| rural                      | 146.4 (144.4, 148.4)     | 111.3 (109.2, 113.3) | 141.9 (140.0, 143.8) | 162.5 (160.1, 165.1) | 163.3 (160.1, 166.5) | 147.9 (146.6, 149.1)     | 112.7 (110.4, 115.1) | 143.4 (141.9, 144.8) | 164.0 (162.7, 165.3) | 164.8 (163.5, 166.1) |
| urban                      | 147.1 (145.2, 149.0)     | 111.9 (109.9, 113.8) | 142.6 (140.8, 144.5) | 163.3 (160.8, 165.7) | 164.1 (161.0, 167.3) | 147.5 (146.3, 148.8)     | 112.3 (110.0, 114.6) | 143.0 (141.6, 144.5) | 163.7 (162.5, 164.9) | 164.6 (163.5, 165.7) |



| Girls                              | Mean height in 1990 (cm) |                      |                      |                      |                      | Mean height in 2020 (cm) |                      |                      |                      |                      |
|------------------------------------|--------------------------|----------------------|----------------------|----------------------|----------------------|--------------------------|----------------------|----------------------|----------------------|----------------------|
|                                    | Age-standardised         | 5 years              | 10 years             | 15 years             | 19 years             | Age-standardised         | 5 years              | 10 years             | 15 years             | 19 years             |
| urban-rural difference             | 0.7 (-0.2, 1.6)          | 0.6 (-0.5, 1.8)      | 0.7 (-0.2, 1.6)      | 0.7 (-0.2, 1.7)      | 0.8 (-0.4, 2.0)      | -0.3 (-1.1, 0.4)         | -0.4 (-1.4, 0.6)     | -0.3 (-1.1, 0.4)     | -0.3 (-1.1, 0.5)     | -0.2 (-1.2, 0.7)     |
| <b>Greece</b>                      |                          |                      |                      |                      |                      |                          |                      |                      |                      |                      |
| rural                              | 146.5 (144.9, 148.1)     | 112.7 (111.0, 114.3) | 142.1 (140.6, 143.6) | 161.6 (159.5, 163.8) | 164.1 (161.3, 166.8) | 149.5 (148.5, 150.5)     | 115.3 (113.4, 117.3) | 145.0 (143.8, 146.2) | 164.8 (163.7, 165.9) | 167.2 (165.8, 168.6) |
| urban                              | 147.4 (145.8, 149.1)     | 113.6 (112.0, 115.3) | 143.0 (141.5, 144.5) | 162.5 (160.4, 164.7) | 165.0 (162.2, 167.7) | 149.3 (148.3, 150.2)     | 115.2 (113.3, 117.1) | 144.8 (143.6, 145.9) | 164.6 (163.6, 165.6) | 167.0 (165.7, 168.3) |
| urban-rural difference             | 0.9 (0.3, 1.6)           | 0.9 (0.1, 1.8)       | 0.9 (0.3, 1.6)       | 0.9 (0.2, 1.7)       | 0.9 (0.0, 1.9)       | -0.2 (-0.8, 0.4)         | -0.2 (-1.0, 0.6)     | -0.2 (-0.8, 0.4)     | -0.2 (-0.8, 0.4)     | -0.2 (-1.0, 0.6)     |
| <b>Israel</b>                      |                          |                      |                      |                      |                      |                          |                      |                      |                      |                      |
| rural                              | 146.3 (145.0, 147.7)     | 112.8 (109.5, 116.1) | 142.4 (140.7, 144.1) | 161.5 (160.4, 162.6) | 162.0 (160.6, 163.3) | 146.4 (145.1, 147.7)     | 112.4 (109.6, 115.1) | 142.4 (140.8, 144.0) | 161.8 (160.6, 163.1) | 162.4 (161.3, 163.5) |
| urban                              | 146.7 (145.4, 148.0)     | 113.4 (110.1, 116.6) | 142.8 (141.2, 144.4) | 161.8 (160.7, 162.8) | 162.2 (160.9, 163.5) | 145.8 (144.6, 146.9)     | 111.9 (109.4, 114.4) | 141.8 (140.3, 143.2) | 161.1 (159.9, 162.4) | 161.6 (160.6, 162.7) |
| urban-rural difference             | 0.4 (-0.4, 1.2)          | 0.6 (-0.7, 1.8)      | 0.4 (-0.5, 1.3)      | 0.3 (-0.4, 1.0)      | 0.3 (-0.5, 1.0)      | -0.6 (-1.4, 0.2)         | -0.4 (-1.7, 0.9)     | -0.6 (-1.4, 0.3)     | -0.7 (-1.3, 0.0)     | -0.7 (-1.4, -0.1)    |
| <b>Italy</b>                       |                          |                      |                      |                      |                      |                          |                      |                      |                      |                      |
| rural                              | 144.8 (143.6, 145.9)     | 113.0 (111.4, 114.7) | 140.6 (139.4, 141.9) | 159.1 (157.8, 160.4) | 160.9 (159.4, 162.5) | 146.4 (145.4, 147.4)     | 115.5 (113.2, 117.7) | 142.6 (141.4, 143.7) | 160.4 (159.2, 161.6) | 161.4 (159.9, 163.0) |
| urban                              | 146.1 (145.0, 147.3)     | 114.0 (112.4, 115.6) | 141.9 (140.6, 143.1) | 160.7 (159.4, 161.9) | 162.7 (161.2, 164.2) | 146.6 (145.6, 147.6)     | 115.3 (113.0, 117.6) | 142.7 (141.5, 143.8) | 160.8 (159.7, 161.9) | 162.0 (160.6, 163.4) |
| urban-rural difference             | 1.4 (0.5, 2.2)           | 1.0 (0.0, 1.9)       | 1.2 (0.4, 2.1)       | 1.5 (0.6, 2.5)       | 1.8 (0.6, 3.1)       | 0.2 (-0.5, 0.9)          | -0.2 (-1.0, 0.6)     | 0.1 (-0.5, 0.8)      | 0.4 (-0.4, 1.2)      | 0.6 (-0.4, 1.7)      |
| <b>Malta</b>                       |                          |                      |                      |                      |                      |                          |                      |                      |                      |                      |
| rural                              | 144.1 (141.1, 146.9)     | 112.4 (109.5, 115.5) | 139.9 (136.9, 142.8) | 158.6 (155.0, 162.1) | 159.8 (155.4, 164.5) | 145.3 (143.6, 147.0)     | 113.5 (110.8, 116.3) | 141.1 (139.3, 142.8) | 159.9 (157.6, 162.3) | 161.3 (158.6, 164.1) |
| urban                              | 144.4 (141.6, 147.2)     | 112.5 (109.7, 115.3) | 140.1 (137.3, 143.0) | 159.0 (155.5, 162.5) | 160.4 (156.0, 165.0) | 144.5 (143.0, 145.9)     | 112.4 (109.9, 114.9) | 140.2 (138.6, 141.8) | 159.2 (157.1, 161.3) | 160.6 (158.2, 163.2) |
| urban-rural difference             | 0.3 (-1.0, 1.6)          | 0.1 (-1.3, 1.5)      | 0.2 (-1.0, 1.5)      | 0.4 (-1.1, 1.9)      | 0.5 (-1.2, 2.2)      | -0.8 (-2.1, 0.3)         | -1.1 (-2.4, 0.2)     | -0.9 (-2.1, 0.3)     | -0.7 (-2.1, 0.6)     | -0.6 (-2.2, 0.9)     |
| <b>Portugal</b>                    |                          |                      |                      |                      |                      |                          |                      |                      |                      |                      |
| rural                              | 143.0 (141.5, 144.5)     | 111.9 (110.2, 113.7) | 139.4 (137.7, 141.1) | 156.8 (155.1, 158.7) | 158.2 (155.9, 160.5) | 145.4 (144.4, 146.4)     | 112.5 (110.9, 114.1) | 141.2 (140.0, 142.3) | 160.0 (158.8, 161.2) | 162.2 (160.5, 163.9) |
| urban                              | 144.0 (142.5, 145.5)     | 113.1 (111.4, 114.9) | 140.4 (138.8, 142.0) | 157.7 (155.9, 159.5) | 159.0 (156.7, 161.2) | 145.2 (144.2, 146.2)     | 112.6 (111.0, 114.1) | 141.1 (140.0, 142.2) | 159.8 (158.6, 161.0) | 161.9 (160.2, 163.6) |
| urban-rural difference             | 1.0 (0.2, 1.8)           | 1.2 (0.3, 2.0)       | 1.0 (0.2, 1.8)       | 0.9 (0.0, 1.8)       | 0.7 (-0.3, 1.8)      | -0.1 (-0.8, 0.5)         | 0.1 (-0.6, 0.8)      | -0.1 (-0.7, 0.5)     | -0.2 (-1.0, 0.5)     | -0.4 (-1.3, 0.6)     |
| <b>Spain</b>                       |                          |                      |                      |                      |                      |                          |                      |                      |                      |                      |
| rural                              | 146.8 (145.4, 148.1)     | 113.9 (112.1, 115.6) | 143.2 (141.6, 144.7) | 161.6 (160.0, 163.1) | 161.5 (159.6, 163.5) | 147.0 (146.2, 147.9)     | 114.3 (112.8, 115.9) | 143.4 (142.4, 144.3) | 161.7 (160.7, 162.7) | 161.8 (160.7, 163.0) |
| urban                              | 147.7 (146.4, 149.0)     | 114.8 (113.1, 116.4) | 144.1 (142.7, 145.6) | 162.5 (161.0, 164.0) | 162.5 (160.6, 164.4) | 146.9 (146.1, 147.7)     | 114.2 (112.7, 115.8) | 143.3 (142.4, 144.2) | 161.6 (160.7, 162.5) | 161.8 (160.7, 162.8) |
| urban-rural difference             | 0.9 (0.2, 1.7)           | 0.9 (0.0, 1.9)       | 0.9 (0.2, 1.7)       | 0.9 (0.1, 1.7)       | 1.0 (0.1, 1.8)       | -0.1 (-0.6, 0.4)         | -0.1 (-0.8, 0.6)     | -0.1 (-0.6, 0.4)     | -0.1 (-0.7, 0.5)     | -0.1 (-0.8, 0.6)     |
| <b>Latin America and Caribbean</b> |                          |                      |                      |                      |                      |                          |                      |                      |                      |                      |
| <i>Andean Latin America</i>        |                          |                      |                      |                      |                      |                          |                      |                      |                      |                      |
| <b>Bolivia</b>                     |                          |                      |                      |                      |                      |                          |                      |                      |                      |                      |
| rural                              | 135.6 (133.7, 137.6)     | 104.1 (99.7, 108.5)  | 132.1 (129.9, 134.3) | 149.9 (148.1, 151.7) | 150.1 (148.3, 152.1) | 139.3 (136.7, 141.9)     | 107.5 (101.8, 113.4) | 135.8 (132.7, 139.0) | 153.7 (151.8, 155.6) | 154.0 (152.4, 155.6) |
| urban                              | 138.5 (136.6, 140.4)     | 107.6 (103.2, 112.1) | 135.1 (133.0, 137.3) | 152.4 (150.7, 154.1) | 152.4 (150.5, 154.4) | 142.3 (139.8, 144.9)     | 111.0 (105.4, 116.7) | 138.9 (135.9, 142.1) | 156.3 (154.5, 158.2) | 156.3 (154.8, 157.9) |
| urban-rural difference             | 2.8 (1.9, 3.8)           | 3.5 (2.1, 4.9)       | 3.0 (2.0, 4.1)       | 2.6 (1.7, 3.4)       | 2.2 (1.3, 3.2)       | 2.9 (1.9, 3.9)           | 3.6 (2.0, 5.1)       | 3.1 (2.0, 4.2)       | 2.6 (1.8, 3.5)       | 2.3 (1.5, 3.2)       |
| <b>Ecuador</b>                     |                          |                      |                      |                      |                      |                          |                      |                      |                      |                      |
| rural                              | 134.8 (132.9, 136.7)     | 102.7 (100.2, 105.2) | 131.0 (129.0, 133.1) | 149.3 (147.1, 151.4) | 150.4 (147.6, 153.1) | 138.2 (137.1, 139.4)     | 105.6 (104.0, 107.2) | 134.5 (133.1, 135.7) | 152.9 (151.7, 154.1) | 154.0 (152.7, 155.3) |
| urban                              | 137.0 (135.2, 138.8)     | 105.1 (102.6, 107.5) | 133.3 (131.3, 135.2) | 151.3 (149.2, 153.4) | 152.4 (149.7, 155.0) | 140.3 (139.2, 141.5)     | 107.9 (106.3, 109.5) | 136.6 (135.4, 137.9) | 154.9 (153.7, 156.0) | 155.9 (154.7, 157.1) |
| urban-rural difference             | 2.2 (1.1, 3.3)           | 2.4 (1.2, 3.6)       | 2.2 (1.2, 3.3)       | 2.1 (1.0, 3.2)       | 2.0 (0.8, 3.2)       | 2.1 (1.4, 2.8)           | 2.3 (1.4, 3.2)       | 2.2 (1.4, 2.9)       | 2.0 (1.3, 2.7)       | 1.9 (1.1, 2.7)       |
| <b>Peru</b>                        |                          |                      |                      |                      |                      |                          |                      |                      |                      |                      |
| rural                              | 134.0 (133.0, 135.0)     | 101.5 (100.0, 103.0) | 129.9 (128.7, 131.0) | 148.8 (147.7, 149.9) | 149.9 (148.5, 151.3) | 137.4 (136.2, 138.5)     | 105.5 (103.0, 107.9) | 133.5 (132.0, 135.0) | 151.9 (151.1, 152.7) | 152.5 (151.8, 153.2) |
| urban                              | 137.6 (136.6, 138.6)     | 106.2 (104.8, 107.6) | 133.8 (132.6, 134.9) | 151.9 (150.9, 153.0) | 152.4 (151.0, 153.8) | 141.2 (140.0, 142.3)     | 110.4 (107.9, 112.7) | 137.6 (136.1, 139.1) | 155.2 (154.4, 156.0) | 155.3 (154.5, 156.0) |
| urban-rural difference             | 3.6 (2.8, 4.4)           | 4.7 (3.7, 5.7)       | 3.9 (3.1, 4.7)       | 3.1 (2.4, 3.9)       | 2.5 (1.8, 3.3)       | 3.8 (3.3, 4.3)           | 4.9 (4.1, 5.7)       | 4.1 (3.5, 4.7)       | 3.3 (2.9, 3.8)       | 2.7 (2.3, 3.2)       |
| <b>Caribbean</b>                   |                          |                      |                      |                      |                      |                          |                      |                      |                      |                      |
| <b>Antigua and Barbuda</b>         |                          |                      |                      |                      |                      |                          |                      |                      |                      |                      |
| rural                              | 145.4 (141.9, 148.8)     | 113.0 (107.7, 118.7) | 141.6 (138.1, 145.0) | 160.0 (156.0, 163.9) | 161.2 (155.5, 167.3) | 148.3 (144.8, 151.7)     | 115.7 (109.1, 122.5) | 144.4 (140.5, 148.4) | 162.9 (159.9, 165.9) | 164.1 (160.1, 168.9) |
| urban                              | 147.1 (143.5, 150.6)     | 115.0 (109.7, 120.5) | 143.4 (139.8, 147.0) | 161.5 (157.5, 165.5) | 162.6 (157.0, 168.6) | 148.8 (145.2, 152.4)     | 116.5 (110.0, 123.2) | 145.0 (141.0, 149.1) | 163.2 (160.0, 166.4) | 164.3 (160.3, 169.1) |
| urban-rural difference             | 1.7 (0.1, 3.4)           | 2.0 (0.3, 3.9)       | 1.8 (0.2, 3.5)       | 1.5 (-0.2, 3.3)      | 1.4 (-0.5, 3.4)      | 0.5 (-1.2, 2.2)          | 0.8 (-1.3, 2.8)      | 0.6 (-1.2, 2.3)      | 0.3 (-1.3, 2.0)      | 0.2 (-1.6, 2.0)      |
| <b>Bahamas</b>                     |                          |                      |                      |                      |                      |                          |                      |                      |                      |                      |
| rural                              | 144.5 (141.2, 147.9)     | 112.3 (106.8, 117.7) | 140.9 (137.4, 144.4) | 159.1 (155.5, 162.6) | 159.8 (155.2, 164.6) | 147.5 (144.3, 150.8)     | 115.3 (108.8, 121.7) | 143.9 (140.2, 147.7) | 162.0 (159.4, 164.7) | 162.8 (159.6, 166.2) |
| urban                              | 146.3 (143.1, 149.4)     | 114.4 (109.0, 119.6) | 142.7 (139.3, 146.0) | 160.6 (157.2, 164.0) | 161.3 (156.8, 166.1) | 148.1 (145.0, 151.1)     | 116.1 (109.8, 122.5) | 144.5 (140.9, 148.2) | 162.4 (160.0, 164.7) | 163.0 (160.3, 166.2) |
| urban-rural difference             | 1.7 (0.1, 3.4)           | 2.1 (0.3, 3.9)       | 1.8 (0.2, 3.5)       | 1.6 (-0.1, 3.3)      | 1.5 (-0.4, 3.4)      | 0.5 (-1.1, 2.2)          | 0.8 (-1.1, 2.9)      | 0.6 (-1.1, 2.3)      | 0.4 (-1.3, 2.0)      | 0.3 (-1.5, 2.0)      |
| <b>Barbados</b>                    |                          |                      |                      |                      |                      |                          |                      |                      |                      |                      |
| rural                              | 146.8 (143.8, 149.9)     | 114.4 (109.3, 119.6) | 143.0 (139.8, 146.3) | 161.4 (157.9, 164.8) | 162.5 (158.1, 166.9) | 149.7 (146.6, 152.8)     | 117.2 (110.9, 123.7) | 145.9 (142.3, 149.5) | 164.3 (161.9, 166.7) | 165.5 (162.9, 168.4) |
| urban                              | 148.5 (145.3, 151.7)     | 116.4 (111.3, 121.7) | 144.7 (141.4, 148.2) | 162.8 (159.4, 166.3) | 163.8 (159.3, 168.3) | 150.1 (146.9, 153.3)     | 117.9 (111.6, 124.5) | 146.4 (142.7, 150.1) | 164.5 (162.0, 167.0) | 165.6 (162.8, 168.5) |

| Girls                                   | Mean height in 1990 (cm) |                      |                      |                      |                      | Mean height in 2020 (cm) |                      |                      |                      |                      |
|-----------------------------------------|--------------------------|----------------------|----------------------|----------------------|----------------------|--------------------------|----------------------|----------------------|----------------------|----------------------|
|                                         | Age-standardised         | 5 years              | 10 years             | 15 years             | 19 years             | Age-standardised         | 5 years              | 10 years             | 15 years             | 19 years             |
| urban-rural difference                  | 1.6 (0.1, 3.2)           | 2.0 (0.2, 3.8)       | 1.7 (0.2, 3.3)       | 1.5 (-0.1, 3.1)      | 1.3 (-0.5, 3.2)      | 0.4 (-1.2, 2.0)          | 0.8 (-1.3, 2.8)      | 0.5 (-1.2, 2.2)      | 0.2 (-1.4, 1.9)      | 0.1 (-1.5, 1.8)      |
| <b>Belize</b>                           |                          |                      |                      |                      |                      |                          |                      |                      |                      |                      |
| rural                                   | 140.6 (137.6, 143.7)     | 108.7 (103.6, 114.0) | 137.2 (133.9, 140.5) | 154.9 (151.8, 158.2) | 155.1 (151.2, 159.0) | 143.3 (140.2, 146.5)     | 112.0 (105.6, 118.6) | 140.1 (136.3, 143.9) | 157.3 (154.8, 159.9) | 157.1 (154.9, 159.4) |
| urban                                   | 142.4 (139.2, 145.5)     | 110.8 (105.6, 116.1) | 139.1 (135.7, 142.3) | 156.5 (153.3, 159.6) | 156.6 (152.8, 160.5) | 143.8 (140.7, 147.1)     | 112.9 (106.2, 119.5) | 140.7 (136.9, 144.6) | 157.7 (155.1, 160.3) | 157.5 (155.3, 159.7) |
| urban-rural difference                  | 1.8 (0.1, 3.4)           | 2.1 (0.3, 3.9)       | 1.8 (0.2, 3.5)       | 1.5 (-0.2, 3.3)      | 1.5 (-0.4, 3.5)      | 0.5 (-1.2, 2.3)          | 0.8 (-1.2, 2.9)      | 0.6 (-1.1, 2.4)      | 0.3 (-1.4, 2.1)      | 0.3 (-1.5, 2.1)      |
| <b>Bermuda</b>                          |                          |                      |                      |                      |                      |                          |                      |                      |                      |                      |
| rural                                   | 144.2 (138.7, 149.5)     | 111.9 (105.3, 118.5) | 140.5 (135.2, 145.7) | 158.6 (152.8, 164.4) | 159.6 (152.2, 167.1) | 147.0 (141.5, 152.4)     | 114.8 (107.4, 122.3) | 143.4 (137.8, 149.0) | 161.5 (155.8, 166.9) | 162.4 (155.6, 169.3) |
| urban                                   | 145.9 (140.4, 151.1)     | 114.0 (107.3, 120.5) | 142.3 (137.0, 147.4) | 160.2 (154.3, 165.9) | 161.1 (153.8, 168.6) | 147.5 (141.9, 152.8)     | 115.6 (108.3, 122.9) | 144.0 (138.4, 149.4) | 161.8 (156.2, 167.3) | 162.7 (156.0, 169.6) |
| urban-rural difference                  | 1.7 (0.1, 3.4)           | 2.1 (0.2, 3.9)       | 1.8 (0.2, 3.5)       | 1.6 (-0.2, 3.3)      | 1.5 (-0.4, 3.4)      | 0.5 (-1.2, 2.2)          | 0.8 (-1.2, 2.9)      | 0.6 (-1.2, 2.4)      | 0.3 (-1.4, 2.1)      | 0.2 (-1.5, 2.1)      |
| <b>Cuba</b>                             |                          |                      |                      |                      |                      |                          |                      |                      |                      |                      |
| rural                                   | 142.4 (140.0, 144.8)     | 110.0 (104.8, 115.1) | 138.7 (135.9, 141.5) | 157.0 (154.8, 159.3) | 157.4 (154.6, 160.3) | 145.5 (142.2, 148.7)     | 113.9 (107.5, 120.6) | 142.1 (138.3, 145.9) | 159.7 (157.2, 162.2) | 159.5 (157.3, 161.8) |
| urban                                   | 144.0 (141.8, 146.0)     | 111.9 (106.9, 116.9) | 140.4 (137.8, 142.9) | 158.5 (156.6, 160.3) | 158.8 (156.4, 161.2) | 145.8 (142.7, 149.0)     | 114.7 (108.1, 121.3) | 142.6 (138.8, 146.3) | 159.9 (157.6, 162.3) | 159.7 (157.7, 161.7) |
| urban-rural difference                  | 1.6 (0.3, 2.9)           | 2.0 (0.3, 3.6)       | 1.7 (0.3, 3.1)       | 1.4 (0.1, 2.8)       | 1.3 (-0.1, 2.8)      | 0.4 (-1.0, 1.8)          | 0.7 (-1.1, 2.7)      | 0.5 (-1.0, 2.0)      | 0.2 (-1.1, 1.5)      | 0.1 (-1.1, 1.5)      |
| <b>Dominica</b>                         |                          |                      |                      |                      |                      |                          |                      |                      |                      |                      |
| rural                                   | 147.2 (144.1, 150.2)     | 114.8 (109.7, 120.0) | 143.4 (140.2, 146.6) | 161.7 (158.4, 165.1) | 162.5 (158.4, 166.7) | 150.2 (146.9, 153.4)     | 117.4 (110.8, 123.7) | 146.3 (142.4, 150.1) | 165.0 (162.4, 167.6) | 166.0 (163.2, 169.0) |
| urban                                   | 148.9 (146.0, 151.8)     | 116.9 (111.8, 122.0) | 145.3 (142.1, 148.4) | 163.4 (160.1, 166.6) | 164.0 (160.0, 168.0) | 150.7 (147.6, 153.9)     | 118.2 (111.9, 124.7) | 147.0 (143.3, 150.7) | 165.4 (162.9, 167.8) | 166.3 (163.8, 169.2) |
| urban-rural difference                  | 1.8 (0.2, 3.4)           | 2.1 (0.3, 3.9)       | 1.9 (0.3, 3.5)       | 1.6 (-0.1, 3.3)      | 1.5 (-0.4, 3.4)      | 0.6 (-1.1, 2.3)          | 0.9 (-1.1, 2.9)      | 0.6 (-1.1, 2.4)      | 0.4 (-1.3, 2.1)      | 0.3 (-1.5, 2.0)      |
| <b>Dominican Republic</b>               |                          |                      |                      |                      |                      |                          |                      |                      |                      |                      |
| rural                                   | 142.1 (140.0, 144.2)     | 110.2 (105.5, 115.3) | 138.5 (135.9, 141.0) | 156.4 (154.7, 158.1) | 157.2 (155.6, 158.8) | 145.0 (142.2, 147.9)     | 112.8 (106.7, 119.1) | 141.3 (137.9, 144.9) | 159.5 (157.6, 161.5) | 160.5 (158.9, 162.1) |
| urban                                   | 143.6 (141.6, 145.7)     | 112.3 (107.5, 117.3) | 140.1 (137.6, 142.7) | 157.7 (156.0, 159.5) | 158.3 (156.6, 159.8) | 145.4 (142.6, 148.3)     | 113.6 (107.6, 120.0) | 141.8 (138.4, 145.3) | 159.7 (157.7, 161.6) | 160.4 (158.8, 162.0) |
| urban-rural difference                  | 1.6 (0.5, 2.6)           | 2.0 (0.5, 3.7)       | 1.7 (0.5, 2.8)       | 1.3 (0.4, 2.3)       | 1.1 (0.0, 2.1)       | 0.3 (-0.9, 1.6)          | 0.8 (-1.0, 2.7)      | 0.5 (-0.9, 1.9)      | 0.1 (-0.9, 1.2)      | -0.1 (-1.2, 0.9)     |
| <b>Grenada</b>                          |                          |                      |                      |                      |                      |                          |                      |                      |                      |                      |
| rural                                   | 146.1 (142.4, 149.8)     | 113.3 (107.5, 119.1) | 142.0 (137.8, 146.2) | 160.8 (156.8, 164.6) | 162.7 (158.4, 166.8) | 148.8 (144.6, 152.9)     | 115.9 (108.7, 122.8) | 144.7 (139.8, 149.5) | 163.5 (159.8, 167.2) | 165.4 (162.2, 168.5) |
| urban                                   | 147.8 (144.0, 151.5)     | 115.4 (109.5, 121.4) | 143.8 (139.5, 148.1) | 162.4 (158.5, 166.2) | 164.1 (159.7, 168.3) | 149.3 (145.1, 153.3)     | 116.8 (109.6, 123.6) | 145.3 (140.4, 150.0) | 163.9 (160.1, 167.5) | 165.6 (162.4, 168.9) |
| urban-rural difference                  | 1.7 (0.2, 3.4)           | 2.0 (0.2, 3.9)       | 1.8 (0.2, 3.5)       | 1.6 (-0.1, 3.3)      | 1.4 (-0.5, 3.4)      | 0.5 (-1.2, 2.2)          | 0.8 (-1.2, 2.9)      | 0.6 (-1.2, 2.4)      | 0.3 (-1.3, 2.1)      | 0.2 (-1.6, 2.0)      |
| <b>Guyana</b>                           |                          |                      |                      |                      |                      |                          |                      |                      |                      |                      |
| rural                                   | 142.1 (139.3, 144.9)     | 110.2 (105.2, 115.2) | 138.6 (135.6, 141.5) | 156.6 (153.5, 159.7) | 156.7 (152.9, 160.6) | 144.5 (141.6, 147.5)     | 112.9 (106.8, 119.3) | 141.2 (137.6, 144.7) | 158.8 (156.7, 161.0) | 158.8 (157.2, 160.5) |
| urban                                   | 144.6 (141.7, 147.5)     | 112.7 (107.7, 117.9) | 141.1 (138.0, 144.1) | 159.0 (155.8, 162.1) | 159.2 (155.3, 163.1) | 145.7 (142.8, 148.6)     | 114.1 (107.9, 120.5) | 142.3 (138.8, 145.9) | 159.9 (157.8, 162.1) | 159.9 (158.3, 161.6) |
| urban-rural difference                  | 2.4 (1.2, 3.7)           | 2.5 (0.9, 4.2)       | 2.5 (1.1, 3.8)       | 2.4 (1.1, 3.7)       | 2.4 (1.0, 3.9)       | 1.1 (-0.2, 2.5)          | 1.2 (-0.7, 3.1)      | 1.2 (-0.3, 2.6)      | 1.1 (-0.1, 2.3)      | 1.1 (0.0, 2.3)       |
| <b>Haiti</b>                            |                          |                      |                      |                      |                      |                          |                      |                      |                      |                      |
| rural                                   | 141.3 (139.1, 143.5)     | 109.0 (104.3, 113.9) | 137.3 (134.7, 139.8) | 155.8 (153.8, 157.7) | 157.6 (155.3, 159.8) | 143.6 (141.1, 146.1)     | 111.1 (105.2, 117.1) | 139.5 (136.5, 142.6) | 158.1 (156.5, 159.8) | 160.1 (158.6, 161.6) |
| urban                                   | 142.9 (140.7, 145.0)     | 111.0 (106.3, 115.9) | 139.0 (136.5, 141.5) | 157.1 (155.2, 159.1) | 158.7 (156.5, 160.9) | 144.0 (141.4, 146.5)     | 111.9 (106.0, 117.9) | 140.0 (137.0, 143.1) | 158.3 (156.7, 159.9) | 160.0 (158.5, 161.5) |
| urban-rural difference                  | 1.6 (0.6, 2.6)           | 2.0 (0.6, 3.6)       | 1.7 (0.6, 2.8)       | 1.4 (0.4, 2.3)       | 1.1 (0.0, 2.1)       | 0.4 (-0.7, 1.4)          | 0.8 (-0.9, 2.5)      | 0.5 (-0.7, 1.7)      | 0.2 (-0.7, 1.0)      | -0.1 (-0.9, 0.7)     |
| <b>Jamaica</b>                          |                          |                      |                      |                      |                      |                          |                      |                      |                      |                      |
| rural                                   | 146.2 (144.1, 148.3)     | 113.5 (109.0, 117.8) | 142.3 (140.1, 144.5) | 161.0 (158.8, 163.3) | 162.0 (159.3, 164.6) | 149.2 (146.6, 151.7)     | 116.7 (111.1, 122.5) | 145.4 (142.4, 148.4) | 163.8 (162.0, 165.7) | 164.5 (162.8, 166.3) |
| urban                                   | 147.2 (145.1, 149.3)     | 114.9 (110.4, 119.3) | 143.5 (141.2, 145.7) | 161.9 (159.7, 164.1) | 162.6 (160.0, 165.2) | 148.9 (146.4, 151.4)     | 116.9 (111.2, 122.7) | 145.3 (142.3, 148.3) | 163.4 (161.6, 165.2) | 163.9 (162.2, 165.6) |
| urban-rural difference                  | 1.0 (-0.1, 2.1)          | 1.5 (-0.1, 3.0)      | 1.2 (0.0, 2.3)       | 0.8 (-0.2, 1.9)      | 0.6 (-0.6, 1.8)      | -0.2 (-1.5, 1.0)         | 0.2 (-1.6, 2.0)      | -0.1 (-1.5, 1.3)     | -0.4 (-1.6, 0.7)     | -0.7 (-1.7, 0.4)     |
| <b>Puerto Rico</b>                      |                          |                      |                      |                      |                      |                          |                      |                      |                      |                      |
| rural                                   | 145.2 (141.3, 149.3)     | 113.7 (107.9, 119.5) | 142.3 (138.1, 146.5) | 159.1 (154.9, 163.3) | 158.6 (153.6, 163.6) | 148.3 (144.2, 152.3)     | 116.7 (109.7, 123.6) | 145.4 (140.8, 149.9) | 162.2 (158.5, 165.7) | 161.7 (158.3, 165.0) |
| urban                                   | 147.0 (143.2, 150.9)     | 115.9 (110.1, 121.6) | 144.2 (140.1, 148.3) | 160.6 (156.5, 164.6) | 160.2 (155.3, 165.0) | 148.9 (145.0, 152.7)     | 117.6 (110.6, 124.7) | 146.1 (141.6, 150.5) | 162.5 (159.1, 165.9) | 162.1 (159.0, 165.2) |
| urban-rural difference                  | 1.8 (0.1, 3.5)           | 2.2 (0.3, 4.0)       | 1.9 (0.2, 3.6)       | 1.5 (-0.3, 3.3)      | 1.6 (-0.3, 3.5)      | 0.6 (-1.1, 2.3)          | 0.9 (-1.1, 3.0)      | 0.7 (-1.1, 2.4)      | 0.3 (-1.5, 2.1)      | 0.4 (-1.3, 2.2)      |
| <b>Saint Kitts and Nevis</b>            |                          |                      |                      |                      |                      |                          |                      |                      |                      |                      |
| rural                                   | 145.2 (142.2, 148.2)     | 113.6 (108.5, 118.9) | 141.9 (138.6, 145.1) | 159.3 (156.1, 162.6) | 159.3 (155.0, 163.5) | 148.6 (145.5, 151.6)     | 116.6 (110.1, 123.0) | 145.3 (141.6, 148.9) | 162.8 (160.3, 165.4) | 162.9 (160.3, 165.9) |
| urban                                   | 146.9 (143.7, 150.0)     | 115.6 (110.3, 120.8) | 143.7 (140.4, 147.0) | 160.8 (157.5, 164.2) | 160.8 (156.5, 165.0) | 149.0 (146.0, 152.2)     | 117.4 (111.0, 123.9) | 145.9 (142.2, 149.5) | 163.1 (160.4, 165.9) | 163.2 (160.5, 166.3) |
| urban-rural difference                  | 1.7 (0.1, 3.3)           | 2.0 (0.2, 3.9)       | 1.8 (0.2, 3.4)       | 1.5 (-0.3, 3.3)      | 1.5 (-0.4, 3.4)      | 0.5 (-1.2, 2.2)          | 0.8 (-1.2, 2.9)      | 0.6 (-1.2, 2.3)      | 0.3 (-1.5, 2.0)      | 0.3 (-1.5, 2.0)      |
| <b>Saint Lucia</b>                      |                          |                      |                      |                      |                      |                          |                      |                      |                      |                      |
| rural                                   | 145.9 (142.1, 149.6)     | 113.1 (107.2, 119.1) | 141.8 (137.5, 146.0) | 160.6 (156.7, 164.4) | 162.5 (158.2, 166.8) | 148.6 (144.5, 152.6)     | 115.8 (108.8, 123.0) | 144.6 (139.8, 149.3) | 163.4 (159.7, 167.0) | 165.2 (162.1, 168.2) |
| urban                                   | 147.6 (143.7, 151.4)     | 115.2 (109.2, 121.3) | 143.6 (139.4, 147.9) | 162.2 (158.1, 166.1) | 163.8 (159.5, 168.3) | 149.1 (144.9, 153.2)     | 116.7 (109.6, 123.9) | 145.2 (140.3, 150.0) | 163.7 (159.9, 167.5) | 165.4 (162.0, 168.6) |
| urban-rural difference                  | 1.7 (0.1, 3.3)           | 2.1 (0.2, 3.8)       | 1.8 (0.2, 3.4)       | 1.5 (-0.2, 3.3)      | 1.4 (-0.6, 3.3)      | 0.5 (-1.2, 2.2)          | 0.8 (-1.3, 2.9)      | 0.6 (-1.2, 2.4)      | 0.3 (-1.4, 2.0)      | 0.2 (-1.7, 2.0)      |
| <b>Saint Vincent and the Grenadines</b> |                          |                      |                      |                      |                      |                          |                      |                      |                      |                      |
| rural                                   | 146.2 (142.9, 149.4)     | 113.8 (108.4, 119.1) | 142.3 (138.9, 145.8) | 160.7 (157.2, 164.3) | 162.0 (157.5, 166.5) | 149.0 (146.6, 151.5)     | 116.6 (110.7, 122.4) | 145.2 (142.2, 148.2) | 163.6 (161.7, 165.5) | 164.8 (162.7, 167.1) |

| Girls                  | Mean height in 1990 (cm) |                      |                      |                      |                      | Mean height in 2020 (cm) |                      |                      |                      |                      |
|------------------------|--------------------------|----------------------|----------------------|----------------------|----------------------|--------------------------|----------------------|----------------------|----------------------|----------------------|
|                        | Age-standardised         | 5 years              | 10 years             | 15 years             | 19 years             | Age-standardised         | 5 years              | 10 years             | 15 years             | 19 years             |
| urban                  | 147.9 (144.7, 151.2)     | 115.9 (110.6, 121.3) | 144.2 (140.7, 147.5) | 162.3 (158.8, 165.8) | 163.4 (158.9, 167.9) | 149.5 (147.1, 152.0)     | 117.5 (111.6, 123.3) | 145.8 (142.9, 148.7) | 163.9 (162.0, 165.8) | 165.0 (163.0, 167.2) |
| urban-rural difference | 1.7 (0.2, 3.3)           | 2.1 (0.3, 3.9)       | 1.8 (0.3, 3.4)       | 1.6 (-0.1, 3.3)      | 1.4 (-0.5, 3.4)      | 0.5 (-1.1, 2.2)          | 0.8 (-1.2, 2.9)      | 0.6 (-1.1, 2.4)      | 0.4 (-1.3, 2.1)      | 0.2 (-1.6, 2.0)      |
| Suriname               |                          |                      |                      |                      |                      |                          |                      |                      |                      |                      |
| rural                  | 143.6 (139.3, 147.8)     | 111.2 (105.0, 117.1) | 139.7 (135.2, 144.2) | 158.1 (153.6, 162.6) | 159.6 (154.3, 165.1) | 145.8 (141.5, 149.9)     | 113.6 (106.6, 120.6) | 142.0 (137.1, 146.8) | 160.2 (156.4, 163.9) | 161.6 (157.7, 165.4) |
| urban                  | 145.3 (141.3, 149.3)     | 113.2 (107.0, 119.1) | 141.5 (137.1, 145.8) | 159.6 (155.4, 163.9) | 161.0 (156.0, 166.1) | 146.2 (142.2, 150.4)     | 114.4 (107.6, 121.5) | 142.5 (137.8, 147.2) | 160.5 (156.9, 164.0) | 161.7 (158.2, 165.2) |
| urban-rural difference | 1.7 (0.1, 3.4)           | 2.0 (0.3, 3.8)       | 1.8 (0.2, 3.4)       | 1.5 (-0.1, 3.3)      | 1.4 (-0.5, 3.3)      | 0.5 (-1.2, 2.1)          | 0.8 (-1.2, 2.8)      | 0.6 (-1.2, 2.3)      | 0.3 (-1.4, 2.0)      | 0.2 (-1.6, 2.0)      |
| Trinidad and Tobago    |                          |                      |                      |                      |                      |                          |                      |                      |                      |                      |
| rural                  | 144.6 (142.7, 146.4)     | 112.3 (110.3, 114.3) | 140.8 (138.9, 142.8) | 159.1 (156.8, 161.5) | 160.2 (157.4, 163.0) | 146.9 (144.1, 149.5)     | 114.6 (110.2, 119.1) | 143.1 (139.8, 146.4) | 161.3 (158.9, 163.7) | 162.4 (159.9, 164.9) |
| urban                  | 146.1 (144.1, 148.1)     | 113.9 (111.8, 115.9) | 142.3 (140.3, 144.4) | 160.6 (158.1, 163.2) | 161.6 (158.7, 164.7) | 147.1 (144.3, 149.9)     | 114.9 (110.3, 119.4) | 143.4 (140.0, 146.7) | 161.5 (159.1, 163.9) | 162.6 (160.1, 165.2) |
| urban-rural difference | 1.5 (0.5, 2.5)           | 1.5 (0.5, 2.6)       | 1.5 (0.5, 2.5)       | 1.5 (0.2, 2.7)       | 1.5 (-0.1, 3.0)      | 0.2 (-0.9, 1.4)          | 0.3 (-1.1, 1.7)      | 0.3 (-0.9, 1.4)      | 0.2 (-1.0, 1.4)      | 0.2 (-1.2, 1.6)      |
| Central Latin America  |                          |                      |                      |                      |                      |                          |                      |                      |                      |                      |
| Colombia               |                          |                      |                      |                      |                      |                          |                      |                      |                      |                      |
| rural                  | 137.8 (136.5, 139.1)     | 104.4 (102.8, 106.0) | 133.9 (132.5, 135.3) | 152.9 (151.4, 154.3) | 153.7 (151.8, 155.5) | 141.6 (140.4, 142.8)     | 108.0 (106.0, 110.0) | 137.9 (136.5, 139.2) | 156.7 (155.5, 158.0) | 157.2 (155.9, 158.5) |
| urban                  | 140.2 (138.8, 141.4)     | 107.2 (105.5, 108.8) | 136.4 (135.0, 137.8) | 155.0 (153.5, 156.5) | 155.6 (153.7, 157.5) | 143.1 (141.9, 144.3)     | 110.0 (108.0, 111.9) | 139.5 (138.2, 140.8) | 158.1 (156.9, 159.3) | 158.3 (157.1, 159.5) |
| urban-rural difference | 2.3 (1.6, 3.0)           | 2.8 (1.9, 3.6)       | 2.5 (1.8, 3.2)       | 2.1 (1.5, 2.8)       | 1.9 (1.1, 2.7)       | 1.5 (0.9, 2.1)           | 2.0 (1.2, 2.7)       | 1.6 (1.0, 2.3)       | 1.3 (0.7, 1.9)       | 1.1 (0.4, 1.8)       |
| Costa Rica             |                          |                      |                      |                      |                      |                          |                      |                      |                      |                      |
| rural                  | 139.4 (136.5, 142.3)     | 107.0 (102.5, 111.7) | 136.0 (132.9, 139.1) | 153.7 (150.5, 156.8) | 154.5 (150.6, 158.3) | 142.4 (139.5, 145.3)     | 109.5 (103.8, 115.2) | 138.9 (135.5, 142.4) | 156.9 (154.6, 159.2) | 157.7 (155.5, 160.1) |
| urban                  | 142.0 (139.3, 144.7)     | 110.1 (105.6, 114.6) | 138.7 (135.7, 141.7) | 156.1 (153.2, 158.9) | 156.6 (153.0, 160.2) | 144.1 (141.4, 146.9)     | 111.7 (106.1, 117.4) | 140.8 (137.5, 144.1) | 158.4 (156.3, 160.4) | 159.0 (157.1, 160.9) |
| urban-rural difference | 2.6 (1.1, 4.0)           | 3.1 (1.4, 4.7)       | 2.7 (1.2, 4.2)       | 2.3 (0.7, 3.9)       | 2.1 (0.3, 3.9)       | 1.7 (0.2, 3.2)           | 2.2 (0.4, 3.9)       | 1.9 (0.3, 3.3)       | 1.5 (-0.1, 3.0)      | 1.3 (-0.5, 2.9)      |
| El Salvador            |                          |                      |                      |                      |                      |                          |                      |                      |                      |                      |
| rural                  | 135.9 (133.6, 138.2)     | 103.5 (99.1, 107.9)  | 132.2 (129.7, 134.8) | 150.1 (147.8, 152.5) | 151.8 (149.2, 154.4) | 140.5 (137.9, 143.1)     | 108.0 (102.6, 113.4) | 137.0 (133.9, 140.0) | 154.7 (152.8, 156.7) | 156.1 (154.2, 158.0) |
| urban                  | 138.3 (136.0, 140.6)     | 106.4 (102.0, 110.7) | 134.8 (132.2, 137.3) | 152.3 (150.1, 154.6) | 153.7 (151.2, 156.4) | 142.0 (139.5, 144.6)     | 110.0 (104.7, 115.6) | 138.7 (135.6, 141.8) | 156.1 (154.2, 158.0) | 157.2 (155.3, 159.0) |
| urban-rural difference | 2.4 (1.4, 3.4)           | 2.8 (1.3, 4.4)       | 2.5 (1.4, 3.6)       | 2.2 (1.2, 3.1)       | 1.9 (0.9, 2.9)       | 1.6 (0.5, 2.6)           | 2.0 (0.4, 3.6)       | 1.7 (0.5, 2.9)       | 1.4 (0.4, 2.3)       | 1.1 (0.1, 2.1)       |
| Guatemala              |                          |                      |                      |                      |                      |                          |                      |                      |                      |                      |
| rural                  | 133.3 (131.7, 134.9)     | 102.8 (99.9, 105.7)  | 130.0 (128.0, 131.9) | 146.7 (145.2, 148.3) | 147.6 (145.7, 149.6) | 136.4 (135.3, 137.4)     | 106.6 (104.8, 108.5) | 133.4 (132.0, 134.7) | 149.4 (148.5, 150.4) | 149.9 (148.9, 150.8) |
| urban                  | 136.5 (134.9, 138.1)     | 106.3 (103.3, 109.2) | 133.3 (131.3, 135.3) | 149.8 (148.3, 151.4) | 150.5 (148.6, 152.5) | 138.7 (137.7, 139.8)     | 109.3 (107.4, 111.2) | 135.8 (134.4, 137.2) | 151.7 (150.7, 152.6) | 152.0 (151.0, 153.0) |
| urban-rural difference | 3.2 (2.3, 4.1)           | 3.5 (2.1, 4.9)       | 3.3 (2.3, 4.3)       | 3.1 (2.3, 3.9)       | 2.9 (2.1, 3.8)       | 2.4 (1.5, 3.2)           | 2.6 (1.2, 4.0)       | 2.5 (1.5, 3.4)       | 2.3 (1.6, 2.9)       | 2.1 (1.5, 2.7)       |
| Honduras               |                          |                      |                      |                      |                      |                          |                      |                      |                      |                      |
| rural                  | 136.1 (133.8, 138.3)     | 104.0 (99.4, 108.6)  | 132.7 (130.1, 135.3) | 150.2 (148.2, 152.3) | 150.7 (148.4, 153.0) | 139.5 (136.7, 142.1)     | 107.3 (101.6, 112.8) | 136.2 (133.0, 139.5) | 153.7 (151.7, 155.6) | 154.0 (152.1, 155.9) |
| urban                  | 139.1 (136.9, 141.3)     | 107.4 (102.9, 111.9) | 135.9 (133.3, 138.4) | 153.1 (151.1, 155.1) | 153.5 (151.2, 155.8) | 141.7 (138.9, 144.4)     | 109.8 (104.3, 115.3) | 138.6 (135.3, 141.8) | 155.7 (153.7, 157.7) | 155.9 (154.1, 157.8) |
| urban-rural difference | 3.1 (2.0, 4.1)           | 3.4 (1.9, 4.8)       | 3.2 (2.0, 4.3)       | 2.9 (1.9, 3.8)       | 2.8 (1.7, 3.8)       | 2.2 (1.2, 3.2)           | 2.6 (1.0, 4.1)       | 2.3 (1.2, 3.4)       | 2.1 (1.2, 2.9)       | 1.9 (1.0, 2.8)       |
| Mexico                 |                          |                      |                      |                      |                      |                          |                      |                      |                      |                      |
| rural                  | 137.3 (136.3, 138.2)     | 104.8 (103.7, 106.0) | 134.0 (133.0, 135.0) | 151.4 (150.3, 152.4) | 152.2 (151.0, 153.4) | 141.4 (140.4, 142.3)     | 108.4 (107.0, 109.7) | 138.2 (137.2, 139.3) | 155.7 (154.8, 156.7) | 156.3 (155.2, 157.4) |
| urban                  | 140.4 (139.5, 141.3)     | 108.2 (107.0, 109.3) | 137.2 (136.2, 138.2) | 154.4 (153.4, 155.4) | 155.2 (154.0, 156.4) | 143.6 (142.6, 144.6)     | 110.8 (109.5, 112.1) | 140.5 (139.5, 141.5) | 157.9 (156.9, 158.9) | 158.3 (157.3, 159.4) |
| urban-rural difference | 3.1 (2.6, 3.7)           | 3.3 (2.6, 4.0)       | 3.2 (2.6, 3.8)       | 3.0 (2.5, 3.6)       | 2.9 (2.3, 3.6)       | 2.2 (1.7, 2.7)           | 2.4 (1.8, 3.1)       | 2.3 (1.7, 2.8)       | 2.1 (1.6, 2.7)       | 2.0 (1.4, 2.6)       |
| Nicaragua              |                          |                      |                      |                      |                      |                          |                      |                      |                      |                      |
| rural                  | 137.1 (135.2, 139.0)     | 104.3 (100.0, 108.6) | 133.5 (131.3, 135.8) | 151.6 (149.9, 153.2) | 152.7 (150.9, 154.3) | 139.9 (137.2, 142.6)     | 107.4 (101.8, 112.9) | 136.5 (133.3, 139.7) | 154.2 (152.3, 156.2) | 155.0 (153.2, 156.8) |
| urban                  | 139.5 (137.5, 141.4)     | 107.2 (102.8, 111.5) | 136.0 (133.8, 138.3) | 153.7 (152.1, 155.3) | 154.6 (152.8, 156.3) | 141.5 (138.7, 144.2)     | 109.5 (103.7, 115.0) | 138.2 (135.0, 141.4) | 155.6 (153.6, 157.6) | 156.1 (154.3, 157.9) |
| urban-rural difference | 2.4 (1.5, 3.2)           | 2.9 (1.6, 4.3)       | 2.5 (1.6, 3.5)       | 2.2 (1.4, 2.9)       | 1.9 (1.1, 2.7)       | 1.6 (0.6, 2.5)           | 2.1 (0.6, 3.5)       | 1.7 (0.7, 2.8)       | 1.4 (0.6, 2.2)       | 1.1 (0.2, 1.9)       |
| Panama                 |                          |                      |                      |                      |                      |                          |                      |                      |                      |                      |
| rural                  | 137.0 (134.9, 139.2)     | 104.5 (102.1, 106.9) | 133.5 (131.3, 135.7) | 151.3 (148.9, 153.7) | 152.6 (149.9, 155.3) | 139.8 (138.0, 141.5)     | 107.3 (103.8, 110.7) | 136.3 (134.2, 138.5) | 154.1 (152.7, 155.4) | 155.2 (153.7, 156.7) |
| urban                  | 141.3 (139.2, 143.5)     | 109.2 (106.9, 111.7) | 137.9 (135.8, 140.1) | 155.4 (153.0, 157.8) | 156.5 (153.7, 159.2) | 143.3 (141.5, 145.0)     | 111.2 (107.6, 114.7) | 139.9 (137.8, 142.0) | 157.3 (156.0, 158.7) | 158.2 (156.8, 159.7) |
| urban-rural difference | 4.3 (3.4, 5.2)           | 4.7 (3.6, 5.9)       | 4.4 (3.5, 5.4)       | 4.1 (3.2, 5.0)       | 3.9 (2.8, 4.9)       | 3.5 (2.6, 4.4)           | 3.9 (2.7, 5.1)       | 3.6 (2.7, 4.6)       | 3.3 (2.4, 4.2)       | 3.0 (2.1, 4.0)       |
| Venezuela              |                          |                      |                      |                      |                      |                          |                      |                      |                      |                      |
| rural                  | 138.7 (135.9, 141.4)     | 106.1 (101.9, 110.4) | 135.0 (131.9, 138.1) | 153.0 (150.0, 156.0) | 154.5 (151.2, 157.8) | 142.4 (139.8, 145.1)     | 108.9 (104.0, 113.9) | 138.6 (135.4, 141.7) | 157.1 (154.7, 159.5) | 159.0 (157.0, 161.0) |
| urban                  | 141.1 (138.5, 143.6)     | 109.1 (105.1, 113.1) | 137.6 (134.7, 140.4) | 155.2 (152.3, 157.9) | 156.4 (153.4, 159.5) | 144.0 (141.6, 146.4)     | 111.0 (106.2, 115.9) | 140.4 (137.4, 143.2) | 158.5 (156.3, 160.7) | 160.1 (158.4, 161.9) |
| urban-rural difference | 2.5 (1.1, 3.8)           | 3.0 (1.4, 4.6)       | 2.6 (1.3, 4.0)       | 2.2 (0.9, 3.6)       | 1.9 (0.4, 3.4)       | 1.6 (0.3, 2.9)           | 2.2 (0.5, 3.8)       | 1.8 (0.4, 3.1)       | 1.4 (0.0, 2.7)       | 1.1 (-0.4, 2.5)      |
| Southern Latin America |                          |                      |                      |                      |                      |                          |                      |                      |                      |                      |
| Argentina              |                          |                      |                      |                      |                      |                          |                      |                      |                      |                      |
| rural                  | 141.1 (138.8, 143.5)     | 107.5 (104.7, 110.3) | 137.7 (135.4, 140.1) | 155.9 (153.2, 158.6) | 156.8 (153.6, 160.0) | 145.3 (143.3, 147.2)     | 111.3 (108.1, 114.4) | 141.9 (139.6, 144.2) | 160.1 (158.3, 161.9) | 161.0 (158.9, 162.9) |
| urban                  | 143.5 (141.4, 145.5)     | 110.0 (107.6, 112.5) | 140.1 (138.1, 142.2) | 158.2 (155.7, 160.6) | 158.9 (156.0, 161.7) | 145.5 (144.0, 147.0)     | 111.8 (108.9, 114.6) | 142.3 (140.4, 144.1) | 160.3 (159.0, 161.6) | 161.0 (159.6, 162.3) |

| Girls                           | Mean height in 1990 (cm) |                      |                      |                      |                      | Mean height in 2020 (cm) |                      |                      |                      |                      |
|---------------------------------|--------------------------|----------------------|----------------------|----------------------|----------------------|--------------------------|----------------------|----------------------|----------------------|----------------------|
|                                 | Age-standardised         | 5 years              | 10 years             | 15 years             | 19 years             | Age-standardised         | 5 years              | 10 years             | 15 years             | 19 years             |
| urban-rural difference          | 2.3 (0.8, 3.9)           | 2.6 (0.9, 4.3)       | 2.4 (0.9, 4.0)       | 2.2 (0.6, 3.9)       | 2.1 (0.3, 3.9)       | 0.3 (-1.2, 1.8)          | 0.5 (-1.2, 2.2)      | 0.3 (-1.2, 1.8)      | 0.2 (-1.3, 1.7)      | 0.0 (-1.5, 1.6)      |
| <b>Brazil</b>                   |                          |                      |                      |                      |                      |                          |                      |                      |                      |                      |
| rural                           | 141.5 (140.6, 142.3)     | 108.9 (107.9, 109.9) | 137.6 (136.7, 138.5) | 156.2 (155.3, 157.2) | 157.2 (156.2, 158.2) | 147.3 (146.6, 148.1)     | 115.2 (113.7, 116.6) | 143.9 (143.1, 144.7) | 161.8 (161.1, 162.5) | 162.1 (161.4, 163.0) |
| urban                           | 143.9 (143.1, 144.6)     | 111.3 (110.4, 112.2) | 140.0 (139.2, 140.8) | 158.7 (157.8, 159.5) | 159.6 (158.8, 160.5) | 147.5 (146.9, 148.1)     | 115.3 (114.0, 116.7) | 144.1 (143.4, 144.8) | 162.0 (161.4, 162.5) | 162.3 (161.6, 163.0) |
| urban-rural difference          | 2.4 (1.8, 3.1)           | 2.4 (1.7, 3.1)       | 2.4 (1.8, 3.1)       | 2.4 (1.8, 3.1)       | 2.4 (1.7, 3.1)       | 0.2 (-0.3, 0.7)          | 0.2 (-0.5, 0.8)      | 0.2 (-0.4, 0.7)      | 0.2 (-0.3, 0.7)      | 0.2 (-0.4, 0.8)      |
| <b>Chile</b>                    |                          |                      |                      |                      |                      |                          |                      |                      |                      |                      |
| rural                           | 141.0 (139.2, 142.9)     | 108.6 (105.8, 111.5) | 138.1 (135.9, 140.3) | 155.2 (153.3, 157.2) | 155.1 (152.7, 157.4) | 144.9 (143.0, 146.7)     | 112.2 (109.0, 115.4) | 142.0 (139.7, 144.2) | 159.2 (157.6, 160.9) | 159.2 (157.6, 160.8) |
| urban                           | 143.4 (141.7, 145.1)     | 111.4 (108.6, 114.2) | 140.6 (138.6, 142.6) | 157.4 (155.8, 159.1) | 157.2 (155.0, 159.2) | 145.2 (143.4, 147.0)     | 112.9 (109.8, 115.9) | 142.4 (140.2, 144.5) | 159.3 (157.8, 160.9) | 159.2 (157.9, 160.6) |
| urban-rural difference          | 2.4 (1.3, 3.5)           | 2.8 (1.4, 4.2)       | 2.5 (1.3, 3.6)       | 2.2 (1.0, 3.3)       | 2.1 (0.8, 3.3)       | 0.3 (-0.7, 1.3)          | 0.7 (-0.8, 2.1)      | 0.4 (-0.7, 1.5)      | 0.1 (-0.9, 1.0)      | 0.0 (-1.0, 1.0)      |
| <b>Paraguay</b>                 |                          |                      |                      |                      |                      |                          |                      |                      |                      |                      |
| rural                           | 141.4 (138.4, 144.3)     | 109.3 (104.6, 114.0) | 138.1 (134.9, 141.1) | 155.6 (152.3, 159.0) | 156.2 (152.1, 160.5) | 146.2 (144.0, 148.4)     | 114.9 (109.8, 119.9) | 143.3 (140.8, 145.9) | 160.1 (158.3, 161.8) | 160.0 (158.0, 162.1) |
| urban                           | 143.9 (141.0, 146.7)     | 111.9 (107.3, 116.5) | 140.6 (137.6, 143.7) | 158.0 (154.7, 161.3) | 158.6 (154.6, 162.7) | 146.6 (144.5, 148.8)     | 115.4 (110.4, 120.5) | 143.8 (141.2, 146.3) | 160.4 (158.6, 162.1) | 160.3 (158.4, 162.3) |
| urban-rural difference          | 2.5 (1.2, 3.7)           | 2.6 (1.1, 4.2)       | 2.5 (1.2, 3.8)       | 2.4 (1.1, 3.7)       | 2.4 (0.8, 3.9)       | 0.4 (-0.7, 1.5)          | 0.5 (-1.0, 2.1)      | 0.4 (-0.8, 1.6)      | 0.3 (-0.8, 1.3)      | 0.3 (-0.9, 1.5)      |
| <b>Uruguay</b>                  |                          |                      |                      |                      |                      |                          |                      |                      |                      |                      |
| rural                           | 141.8 (139.1, 144.5)     | 109.3 (106.3, 112.2) | 138.1 (135.4, 140.7) | 156.4 (153.2, 159.7) | 157.5 (153.6, 161.4) | 145.9 (143.8, 148.0)     | 113.4 (109.6, 117.1) | 142.3 (139.9, 144.8) | 160.5 (158.5, 162.4) | 161.3 (158.8, 163.8) |
| urban                           | 144.3 (142.0, 146.6)     | 111.9 (109.4, 114.3) | 140.6 (138.3, 142.8) | 158.8 (155.9, 161.7) | 159.8 (156.4, 163.3) | 146.3 (144.7, 147.8)     | 113.9 (110.6, 117.2) | 142.7 (140.7, 144.7) | 160.8 (159.5, 162.1) | 161.6 (160.0, 163.3) |
| urban-rural difference          | 2.5 (0.9, 4.1)           | 2.6 (0.9, 4.4)       | 2.5 (0.9, 4.2)       | 2.4 (0.7, 4.2)       | 2.3 (0.3, 4.4)       | 0.4 (-1.2, 2.0)          | 0.5 (-1.3, 2.4)      | 0.4 (-1.2, 2.1)      | 0.3 (-1.3, 2.0)      | 0.3 (-1.5, 2.0)      |
| <b>Oceania</b>                  |                          |                      |                      |                      |                      |                          |                      |                      |                      |                      |
| <b>Melanesia</b>                |                          |                      |                      |                      |                      |                          |                      |                      |                      |                      |
| <b>Fiji</b>                     |                          |                      |                      |                      |                      |                          |                      |                      |                      |                      |
| rural                           | 143.9 (141.3, 146.5)     | 111.7 (106.5, 117.1) | 139.5 (136.6, 142.4) | 158.4 (155.6, 161.1) | 161.2 (157.9, 164.3) | 146.5 (143.7, 149.3)     | 113.5 (107.3, 119.8) | 141.9 (138.4, 145.3) | 161.4 (159.3, 163.5) | 164.6 (162.5, 166.9) |
| urban                           | 144.2 (141.6, 146.8)     | 112.9 (107.5, 118.3) | 140.0 (137.2, 142.9) | 158.3 (155.5, 161.1) | 160.6 (157.3, 163.8) | 146.7 (143.9, 149.5)     | 114.6 (108.2, 120.9) | 142.3 (138.9, 145.7) | 161.2 (159.2, 163.2) | 164.0 (161.9, 166.1) |
| urban-rural difference          | 0.3 (-1.2, 1.8)          | 1.2 (-0.8, 3.2)      | 0.5 (-1.0, 2.2)      | -0.1 (-1.6, 1.4)     | -0.6 (-2.3, 1.1)     | 0.2 (-1.6, 2.1)          | 1.1 (-1.4, 3.5)      | 0.5 (-1.5, 2.4)      | -0.2 (-1.8, 1.6)     | -0.6 (-2.4, 1.1)     |
| <b>Papua New Guinea</b>         |                          |                      |                      |                      |                      |                          |                      |                      |                      |                      |
| rural                           | 138.6 (135.2, 142.1)     | 106.3 (100.3, 112.3) | 134.4 (130.4, 138.3) | 153.3 (149.6, 156.9) | 155.2 (151.0, 159.4) | 140.8 (137.0, 144.6)     | 108.9 (101.6, 116.1) | 136.7 (132.0, 141.1) | 155.3 (152.2, 158.4) | 157.0 (154.1, 160.0) |
| urban                           | 139.5 (135.8, 143.3)     | 107.8 (101.7, 114.0) | 135.5 (131.3, 139.6) | 153.9 (149.9, 157.9) | 155.5 (151.0, 160.0) | 141.6 (137.7, 145.6)     | 110.3 (103.1, 117.7) | 137.7 (133.0, 142.3) | 155.8 (152.4, 159.2) | 157.2 (153.9, 160.6) |
| urban-rural difference          | 0.9 (-1.1, 3.0)          | 1.5 (-0.7, 3.8)      | 1.1 (-0.9, 3.2)      | 0.7 (-1.5, 2.8)      | 0.3 (-2.1, 2.7)      | 0.8 (-1.3, 3.0)          | 1.4 (-1.2, 4.1)      | 1.0 (-1.2, 3.3)      | 0.5 (-1.5, 2.7)      | 0.2 (-2.0, 2.4)      |
| <b>Solomon Islands</b>          |                          |                      |                      |                      |                      |                          |                      |                      |                      |                      |
| rural                           | 137.1 (134.3, 139.8)     | 103.8 (100.4, 107.3) | 132.4 (129.5, 135.3) | 152.1 (148.8, 155.3) | 155.1 (151.4, 158.7) | 138.9 (136.3, 141.5)     | 105.8 (101.9, 109.8) | 134.3 (131.1, 137.5) | 153.8 (151.2, 156.3) | 156.8 (154.5, 159.1) |
| urban                           | 138.5 (135.6, 141.2)     | 105.8 (102.3, 109.2) | 134.0 (130.9, 137.0) | 153.3 (149.9, 156.6) | 156.0 (152.3, 159.6) | 140.2 (137.3, 142.9)     | 107.7 (103.9, 111.5) | 135.7 (132.4, 139.0) | 154.9 (152.2, 157.6) | 157.6 (155.0, 160.1) |
| urban-rural difference          | 1.4 (-0.3, 3.1)          | 1.9 (-0.1, 3.9)      | 1.6 (-0.2, 3.3)      | 1.2 (-0.6, 3.0)      | 0.9 (-1.1, 2.9)      | 1.3 (-0.5, 3.1)          | 1.8 (-0.5, 4.1)      | 1.4 (-0.5, 3.3)      | 1.1 (-0.7, 2.8)      | 0.8 (-1.1, 2.6)      |
| <b>Vanuatu</b>                  |                          |                      |                      |                      |                      |                          |                      |                      |                      |                      |
| rural                           | 140.2 (136.6, 143.7)     | 107.8 (101.6, 113.8) | 135.8 (131.6, 139.9) | 154.9 (151.2, 158.7) | 157.5 (153.7, 161.3) | 142.6 (138.7, 146.7)     | 110.0 (102.9, 117.4) | 138.2 (133.4, 143.1) | 157.4 (154.0, 160.8) | 160.1 (157.1, 163.1) |
| urban                           | 141.1 (137.4, 144.8)     | 109.3 (103.2, 115.5) | 136.9 (132.6, 141.2) | 155.5 (151.7, 159.4) | 157.8 (153.7, 161.9) | 143.4 (139.2, 147.6)     | 111.4 (104.2, 119.1) | 139.1 (134.2, 144.1) | 157.9 (154.3, 161.5) | 160.3 (156.9, 163.7) |
| urban-rural difference          | 0.9 (-1.1, 3.0)          | 1.5 (-0.7, 3.8)      | 1.1 (-1.0, 3.1)      | 0.6 (-1.5, 2.8)      | 0.3 (-2.1, 2.7)      | 0.8 (-1.3, 2.9)          | 1.4 (-1.2, 4.0)      | 1.0 (-1.2, 3.2)      | 0.5 (-1.5, 2.6)      | 0.2 (-2.0, 2.5)      |
| <b>Polynesia and Micronesia</b> |                          |                      |                      |                      |                      |                          |                      |                      |                      |                      |
| <b>American Samoa</b>           |                          |                      |                      |                      |                      |                          |                      |                      |                      |                      |
| rural                           | 146.2 (143.6, 148.7)     | 113.4 (109.2, 117.4) | 141.2 (137.8, 144.5) | 161.3 (158.2, 164.5) | 164.4 (160.8, 168.0) | 148.4 (144.4, 152.4)     | 116.3 (110.4, 122.1) | 143.7 (139.0, 148.2) | 163.3 (159.1, 167.2) | 166.0 (161.9, 170.1) |
| urban                           | 147.1 (144.4, 149.7)     | 114.8 (110.0, 119.3) | 142.3 (138.8, 145.8) | 162.0 (159.0, 165.1) | 164.8 (161.6, 168.0) | 148.7 (144.7, 152.7)     | 117.0 (110.9, 122.9) | 144.1 (139.4, 148.7) | 163.3 (159.3, 167.2) | 165.8 (162.0, 169.5) |
| urban-rural difference          | 0.9 (-1.1, 3.0)          | 1.4 (-0.9, 3.6)      | 1.1 (-1.0, 3.1)      | 0.7 (-1.4, 2.9)      | 0.5 (-2.0, 2.9)      | 0.3 (-1.9, 2.5)          | 0.7 (-2.1, 3.4)      | 0.4 (-1.9, 2.7)      | 0.1 (-2.0, 2.3)      | -0.2 (-2.4, 2.1)     |
| <b>Cook Islands</b>             |                          |                      |                      |                      |                      |                          |                      |                      |                      |                      |
| rural                           | 146.9 (144.1, 149.8)     | 114.7 (109.1, 120.4) | 142.3 (139.0, 145.6) | 161.9 (158.8, 164.9) | 163.6 (160.1, 166.9) | 150.2 (147.2, 153.3)     | 117.7 (111.0, 124.6) | 145.5 (142.0, 149.2) | 165.3 (162.9, 167.8) | 167.2 (164.5, 170.0) |
| urban                           | 147.8 (145.1, 150.6)     | 116.1 (110.4, 121.8) | 143.4 (140.1, 146.6) | 162.6 (159.8, 165.4) | 164.1 (160.9, 167.2) | 150.5 (147.7, 153.3)     | 118.5 (111.8, 125.4) | 146.0 (142.6, 149.3) | 165.4 (163.4, 167.4) | 167.1 (164.8, 169.4) |
| urban-rural difference          | 0.9 (-1.1, 3.0)          | 1.4 (-0.9, 3.7)      | 1.1 (-1.0, 3.1)      | 0.7 (-1.4, 2.9)      | 0.5 (-1.9, 2.9)      | 0.3 (-2.0, 2.5)          | 0.8 (-2.1, 3.5)      | 0.4 (-2.0, 2.7)      | 0.1 (-2.2, 2.2)      | -0.2 (-2.4, 2.1)     |
| <b>French Polynesia</b>         |                          |                      |                      |                      |                      |                          |                      |                      |                      |                      |
| rural                           | 147.6 (144.6, 150.7)     | 115.8 (110.3, 121.4) | 143.1 (139.9, 146.5) | 162.3 (158.9, 165.8) | 164.2 (159.7, 168.6) | 150.6 (147.6, 153.5)     | 119.4 (112.8, 125.9) | 146.3 (142.9, 149.6) | 165.0 (162.7, 167.3) | 166.6 (164.0, 169.2) |
| urban                           | 148.5 (145.4, 151.6)     | 117.2 (111.6, 122.8) | 144.2 (140.8, 147.5) | 163.0 (159.5, 166.5) | 164.6 (160.2, 168.9) | 150.9 (148.0, 153.6)     | 120.2 (113.7, 126.7) | 146.7 (143.4, 149.9) | 165.1 (162.9, 167.2) | 166.4 (164.0, 169.0) |
| urban-rural difference          | 0.9 (-1.1, 3.0)          | 1.4 (-0.9, 3.7)      | 1.0 (-1.0, 3.1)      | 0.7 (-1.4, 2.9)      | 0.4 (-2.0, 3.0)      | 0.3 (-2.0, 2.4)          | 0.7 (-2.0, 3.4)      | 0.4 (-2.0, 2.6)      | 0.0 (-2.1, 2.2)      | -0.2 (-2.5, 2.1)     |
| <b>Kiribati</b>                 |                          |                      |                      |                      |                      |                          |                      |                      |                      |                      |
| rural                           | 142.0 (139.1, 144.9)     | 110.4 (104.8, 116.0) | 137.7 (134.4, 141.0) | 156.7 (153.7, 159.8) | 157.8 (154.4, 161.4) | 145.2 (141.9, 148.6)     | 114.0 (106.8, 121.1) | 141.0 (137.1, 145.0) | 159.8 (157.1, 162.4) | 160.7 (158.3, 163.2) |
| urban                           | 142.9 (139.9, 146.0)     | 111.8 (105.9, 117.5) | 138.7 (135.4, 142.2) | 157.4 (154.3, 160.4) | 158.3 (154.6, 161.9) | 145.5 (142.1, 148.8)     | 114.7 (107.6, 121.8) | 141.4 (137.4, 145.4) | 159.8 (157.2, 162.5) | 160.5 (158.1, 162.9) |

| Girls                                   | Mean height in 1990 (cm) |                      |                      |                      |                      | Mean height in 2020 (cm) |                      |                      |                      |                      |
|-----------------------------------------|--------------------------|----------------------|----------------------|----------------------|----------------------|--------------------------|----------------------|----------------------|----------------------|----------------------|
|                                         | Age-standardised         | 5 years              | 10 years             | 15 years             | 19 years             | Age-standardised         | 5 years              | 10 years             | 15 years             | 19 years             |
| urban-rural difference                  | 0.9 (-1.1, 2.9)          | 1.4 (-0.9, 3.6)      | 1.0 (-1.0, 3.0)      | 0.7 (-1.4, 2.8)      | 0.4 (-1.9, 2.8)      | 0.2 (-2.0, 2.5)          | 0.7 (-2.1, 3.5)      | 0.4 (-2.0, 2.8)      | 0.0 (-2.1, 2.2)      | -0.2 (-2.4, 2.0)     |
| <b>Marshall Islands</b>                 |                          |                      |                      |                      |                      |                          |                      |                      |                      |                      |
| rural                                   | 137.7 (134.7, 140.7)     | 106.5 (100.9, 112.3) | 133.7 (130.3, 137.3) | 152.1 (149.1, 155.1) | 152.6 (149.2, 156.1) | 140.7 (137.0, 144.3)     | 110.8 (103.5, 118.1) | 137.1 (132.7, 141.4) | 154.5 (151.5, 157.3) | 154.3 (151.9, 156.8) |
| urban                                   | 138.5 (135.5, 141.4)     | 107.8 (102.1, 113.9) | 134.7 (131.1, 138.1) | 152.6 (149.8, 155.3) | 153.0 (149.8, 156.2) | 140.8 (137.3, 144.2)     | 111.5 (104.2, 118.7) | 137.4 (133.1, 141.6) | 154.3 (151.7, 156.9) | 154.0 (152.0, 156.1) |
| urban-rural difference                  | 0.8 (-1.2, 2.8)          | 1.3 (-0.9, 3.6)      | 0.9 (-1.1, 3.0)      | 0.5 (-1.6, 2.6)      | 0.4 (-2.0, 2.7)      | 0.2 (-2.0, 2.3)          | 0.7 (-2.1, 3.3)      | 0.3 (-2.0, 2.6)      | -0.1 (-2.3, 2.0)     | -0.3 (-2.4, 1.9)     |
| <b>Micronesia (Federated States of)</b> |                          |                      |                      |                      |                      |                          |                      |                      |                      |                      |
| rural                                   | 141.1 (138.2, 143.9)     | 109.1 (103.5, 115.0) | 136.5 (133.1, 140.0) | 155.9 (153.0, 158.7) | 157.9 (155.0, 160.8) | 143.8 (140.4, 147.3)     | 112.8 (105.8, 120.0) | 139.5 (135.4, 143.8) | 158.2 (155.5, 160.8) | 159.7 (157.3, 162.2) |
| urban                                   | 141.9 (138.9, 144.9)     | 110.5 (104.7, 116.6) | 137.5 (134.0, 141.0) | 156.4 (153.4, 159.3) | 158.2 (155.1, 161.1) | 144.0 (140.4, 147.5)     | 113.5 (106.3, 120.7) | 139.8 (135.7, 144.0) | 158.1 (155.3, 160.9) | 159.4 (156.8, 161.9) |
| urban-rural difference                  | 0.8 (-0.8, 2.4)          | 1.4 (-0.7, 3.5)      | 1.0 (-0.7, 2.6)      | 0.6 (-1.0, 2.1)      | 0.3 (-1.5, 2.0)      | 0.2 (-1.8, 2.1)          | 0.7 (-1.9, 3.3)      | 0.3 (-1.8, 2.4)      | -0.1 (-1.8, 1.7)     | -0.4 (-2.1, 1.4)     |
| <b>Nauru</b>                            |                          |                      |                      |                      |                      |                          |                      |                      |                      |                      |
| rural                                   | 140.5 (137.5, 143.6)     | 108.4 (102.8, 114.2) | 136.1 (132.8, 139.5) | 155.5 (152.1, 158.7) | 156.9 (153.0, 160.7) | 142.8 (139.2, 146.3)     | 111.8 (104.5, 118.9) | 138.6 (134.6, 142.8) | 157.2 (154.2, 160.1) | 158.0 (155.2, 160.9) |
| urban                                   | 141.3 (138.6, 144.0)     | 109.7 (104.1, 115.5) | 137.0 (134.0, 140.1) | 156.0 (153.2, 158.7) | 157.1 (154.0, 160.3) | 142.9 (139.7, 145.9)     | 112.4 (105.4, 119.5) | 138.9 (135.2, 142.7) | 157.0 (154.7, 159.3) | 157.6 (155.7, 159.5) |
| urban-rural difference                  | 0.7 (-1.3, 2.7)          | 1.2 (-1.0, 3.5)      | 0.9 (-1.2, 2.8)      | 0.5 (-1.6, 2.6)      | 0.3 (-2.1, 2.6)      | 0.1 (-2.1, 2.3)          | 0.6 (-2.2, 3.3)      | 0.2 (-2.1, 2.5)      | -0.1 (-2.3, 2.0)     | -0.4 (-2.6, 1.8)     |
| <b>Niue</b>                             |                          |                      |                      |                      |                      |                          |                      |                      |                      |                      |
| rural                                   | 146.9 (143.7, 150.1)     | 115.5 (109.9, 121.1) | 142.8 (139.3, 146.1) | 161.5 (158.0, 164.9) | 162.5 (157.9, 167.0) | 149.5 (146.9, 152.1)     | 118.2 (111.8, 124.6) | 145.4 (142.3, 148.5) | 164.0 (162.1, 166.0) | 165.2 (162.8, 167.6) |
| urban                                   | 147.7 (144.4, 151.0)     | 116.8 (111.0, 122.7) | 143.7 (140.3, 147.3) | 162.0 (158.5, 165.5) | 162.9 (158.4, 167.3) | 149.7 (147.1, 152.5)     | 118.8 (112.3, 125.5) | 145.7 (142.5, 148.9) | 164.0 (161.9, 166.0) | 164.9 (162.5, 167.4) |
| urban-rural difference                  | 0.8 (-1.2, 2.9)          | 1.3 (-1.0, 3.6)      | 1.0 (-1.1, 3.0)      | 0.6 (-1.5, 2.7)      | 0.4 (-2.0, 2.7)      | 0.2 (-2.1, 2.4)          | 0.7 (-2.1, 3.4)      | 0.3 (-2.0, 2.6)      | -0.1 (-2.2, 2.1)     | -0.3 (-2.6, 1.9)     |
| <b>Palau</b>                            |                          |                      |                      |                      |                      |                          |                      |                      |                      |                      |
| rural                                   | 141.3 (137.5, 145.2)     | 110.0 (103.8, 116.3) | 137.3 (132.8, 141.8) | 155.8 (151.7, 159.7) | 156.5 (152.0, 161.0) | 143.8 (139.7, 148.0)     | 113.1 (105.7, 120.7) | 139.9 (135.0, 144.9) | 158.0 (154.4, 161.4) | 158.4 (155.7, 161.2) |
| urban                                   | 142.2 (138.4, 145.9)     | 111.4 (104.8, 118.0) | 138.3 (134.0, 142.6) | 156.3 (152.6, 159.9) | 156.9 (152.6, 161.1) | 144.0 (139.9, 148.0)     | 113.8 (106.4, 121.4) | 140.2 (135.3, 145.0) | 157.9 (154.6, 161.0) | 158.2 (155.8, 160.5) |
| urban-rural difference                  | 0.8 (-1.2, 2.9)          | 1.3 (-1.0, 3.7)      | 1.0 (-1.1, 3.0)      | 0.6 (-1.6, 2.7)      | 0.4 (-2.0, 2.8)      | 0.2 (-2.1, 2.4)          | 0.7 (-2.1, 3.4)      | 0.3 (-2.1, 2.6)      | -0.1 (-2.3, 2.1)     | -0.2 (-2.5, 2.0)     |
| <b>Samoa</b>                            |                          |                      |                      |                      |                      |                          |                      |                      |                      |                      |
| rural                                   | 142.2 (140.6, 143.9)     | 110.1 (106.8, 113.3) | 137.2 (134.8, 139.6) | 157.1 (154.9, 159.4) | 160.5 (158.0, 163.0) | 145.3 (142.1, 148.6)     | 113.1 (107.7, 118.7) | 140.2 (136.5, 144.2) | 160.1 (157.1, 163.2) | 163.7 (161.4, 166.0) |
| urban                                   | 143.3 (141.2, 145.5)     | 111.5 (107.8, 115.4) | 138.4 (135.7, 141.2) | 158.0 (155.4, 160.6) | 161.1 (158.1, 164.0) | 145.6 (142.2, 149.1)     | 113.9 (108.2, 119.8) | 140.7 (136.6, 144.8) | 160.3 (157.1, 163.5) | 163.6 (161.0, 166.3) |
| urban-rural difference                  | 1.0 (-0.9, 3.0)          | 1.5 (-0.8, 3.7)      | 1.2 (-0.8, 3.1)      | 0.9 (-1.1, 2.8)      | 0.6 (-1.5, 2.8)      | 0.4 (-1.8, 2.6)          | 0.8 (-1.9, 3.5)      | 0.5 (-1.8, 2.8)      | 0.2 (-1.9, 2.3)      | -0.1 (-2.1, 2.0)     |
| <b>Tokelau</b>                          |                          |                      |                      |                      |                      |                          |                      |                      |                      |                      |
| rural                                   | 146.5 (143.2, 149.6)     | 114.6 (108.7, 120.7) | 142.0 (138.3, 145.7) | 161.3 (158.0, 164.5) | 162.8 (159.0, 166.4) | 149.3 (145.6, 153.1)     | 117.2 (109.8, 124.8) | 144.8 (140.3, 149.3) | 164.3 (161.1, 167.3) | 166.0 (163.5, 168.4) |
| urban                                   | 147.2 (143.6, 150.8)     | 115.9 (109.6, 122.1) | 142.9 (138.9, 146.9) | 161.8 (158.1, 165.5) | 163.1 (158.9, 167.3) | 149.5 (145.4, 153.5)     | 117.8 (110.3, 125.4) | 145.1 (140.4, 149.8) | 164.1 (160.8, 167.6) | 165.6 (162.5, 168.7) |
| urban-rural difference                  | 0.8 (-1.2, 2.8)          | 1.2 (-1.0, 3.5)      | 0.9 (-1.1, 2.9)      | 0.5 (-1.6, 2.6)      | 0.3 (-2.1, 2.7)      | 0.1 (-2.1, 2.3)          | 0.6 (-2.2, 3.3)      | 0.2 (-2.1, 2.6)      | -0.1 (-2.2, 2.1)     | -0.4 (-2.5, 1.9)     |
| <b>Tonga</b>                            |                          |                      |                      |                      |                      |                          |                      |                      |                      |                      |
| rural                                   | 147.2 (144.7, 149.7)     | 115.2 (110.1, 120.6) | 142.6 (139.9, 145.1) | 162.1 (159.3, 165.0) | 164.2 (160.7, 167.7) | 149.0 (146.6, 151.4)     | 116.8 (110.5, 123.2) | 144.2 (141.3, 147.1) | 164.0 (162.4, 165.7) | 166.5 (164.8, 168.2) |
| urban                                   | 148.0 (145.1, 151.0)     | 116.4 (110.9, 122.0) | 143.5 (140.5, 146.5) | 162.8 (159.5, 166.0) | 164.6 (160.7, 168.5) | 149.2 (146.3, 152.0)     | 117.3 (110.8, 124.0) | 144.5 (141.2, 147.7) | 164.0 (161.7, 166.3) | 166.2 (163.9, 168.6) |
| urban-rural difference                  | 0.8 (-1.2, 2.9)          | 1.2 (-1.1, 3.5)      | 0.9 (-1.1, 3.0)      | 0.7 (-1.4, 2.8)      | 0.4 (-1.9, 2.8)      | 0.2 (-2.1, 2.4)          | 0.6 (-2.2, 3.2)      | 0.3 (-2.1, 2.5)      | 0.0 (-2.1, 2.2)      | -0.2 (-2.4, 2.1)     |
| <b>Tuvalu</b>                           |                          |                      |                      |                      |                      |                          |                      |                      |                      |                      |
| rural                                   | 144.3 (141.0, 147.7)     | 112.4 (106.7, 118.1) | 139.8 (136.3, 143.5) | 159.1 (155.3, 162.8) | 160.9 (155.9, 165.8) | 147.1 (143.9, 150.3)     | 115.5 (108.6, 122.6) | 142.7 (138.9, 146.5) | 161.7 (159.1, 164.3) | 163.4 (160.8, 166.0) |
| urban                                   | 145.2 (141.9, 148.7)     | 113.8 (107.9, 119.7) | 140.9 (137.4, 144.5) | 159.8 (156.1, 163.5) | 161.4 (156.5, 166.2) | 147.3 (144.2, 150.5)     | 116.3 (109.4, 123.2) | 143.1 (139.3, 146.9) | 161.7 (159.4, 164.1) | 163.2 (160.8, 165.6) |
| urban-rural difference                  | 0.9 (-1.1, 2.9)          | 1.4 (-0.9, 3.7)      | 1.1 (-1.0, 3.1)      | 0.7 (-1.4, 2.8)      | 0.4 (-2.0, 2.8)      | 0.3 (-2.0, 2.4)          | 0.7 (-2.0, 3.5)      | 0.4 (-1.9, 2.7)      | 0.0 (-2.1, 2.1)      | -0.2 (-2.5, 2.0)     |
| <b>South Asia</b>                       |                          |                      |                      |                      |                      |                          |                      |                      |                      |                      |
| <b>Afghanistan</b>                      |                          |                      |                      |                      |                      |                          |                      |                      |                      |                      |
| rural                                   | 135.3 (132.5, 138.1)     | 102.3 (98.2, 106.4)  | 129.9 (127.2, 132.7) | 150.6 (147.2, 153.9) | 154.5 (150.3, 158.5) | 136.3 (134.2, 138.3)     | 103.8 (99.4, 108.4)  | 130.9 (128.6, 133.2) | 151.2 (149.5, 153.0) | 155.1 (153.5, 156.8) |
| urban                                   | 137.4 (134.6, 140.3)     | 105.7 (101.6, 109.8) | 132.4 (129.6, 135.1) | 152.1 (148.8, 155.5) | 155.3 (151.1, 159.5) | 138.4 (136.3, 140.4)     | 107.2 (102.9, 111.8) | 133.4 (131.1, 135.7) | 152.8 (151.1, 154.5) | 155.9 (154.2, 157.6) |
| urban-rural difference                  | 2.2 (1.1, 3.2)           | 3.5 (2.0, 4.9)       | 2.5 (1.4, 3.6)       | 1.6 (0.5, 2.6)       | 0.8 (-0.4, 2.0)      | 2.1 (1.2, 3.0)           | 3.4 (2.1, 4.9)       | 2.5 (1.5, 3.5)       | 1.5 (0.7, 2.4)       | 0.8 (-0.2, 1.7)      |
| <b>Bangladesh</b>                       |                          |                      |                      |                      |                      |                          |                      |                      |                      |                      |
| rural                                   | 137.2 (135.6, 138.9)     | 108.0 (103.9, 112.3) | 133.8 (131.9, 135.8) | 150.6 (149.1, 151.9) | 150.4 (148.8, 152.0) | 139.4 (138.1, 140.8)     | 110.9 (106.9, 115.1) | 136.3 (134.8, 137.7) | 152.4 (151.3, 153.5) | 152.1 (151.2, 153.1) |
| urban                                   | 138.8 (137.1, 140.6)     | 110.5 (106.3, 114.8) | 135.7 (133.7, 137.8) | 151.7 (150.3, 152.9) | 151.3 (149.7, 152.9) | 140.9 (139.4, 142.4)     | 113.3 (109.2, 117.5) | 137.9 (136.3, 139.6) | 153.4 (152.1, 154.6) | 152.8 (151.9, 153.8) |
| urban-rural difference                  | 1.6 (0.7, 2.6)           | 2.5 (1.0, 4.0)       | 1.8 (0.8, 2.9)       | 1.1 (0.3, 1.9)       | 0.9 (0.1, 1.7)       | 1.4 (0.6, 2.3)           | 2.3 (0.9, 3.8)       | 1.7 (0.7, 2.7)       | 0.9 (0.2, 1.7)       | 0.8 (0.1, 1.4)       |
| <b>Bhutan</b>                           |                          |                      |                      |                      |                      |                          |                      |                      |                      |                      |
| rural                                   | 137.0 (133.7, 140.2)     | 105.3 (100.1, 110.7) | 132.6 (129.0, 136.2) | 151.7 (148.3, 154.9) | 152.6 (148.8, 156.6) | 138.9 (136.2, 141.7)     | 108.1 (102.4, 114.0) | 134.8 (131.5, 138.2) | 153.2 (151.2, 155.3) | 153.9 (152.2, 155.7) |
| urban                                   | 138.5 (135.2, 141.6)     | 107.6 (102.6, 113.1) | 134.3 (130.8, 137.8) | 152.8 (149.6, 156.0) | 153.4 (149.5, 157.2) | 140.2 (137.6, 142.9)     | 110.2 (104.6, 116.1) | 136.3 (133.1, 139.6) | 154.2 (152.3, 156.1) | 154.5 (152.9, 156.2) |
| urban-rural difference                  | 1.5 (0.2, 2.8)           | 2.3 (0.7, 4.0)       | 1.7 (0.4, 3.1)       | 1.1 (-0.2, 2.5)      | 0.8 (-0.7, 2.2)      | 1.3 (0.1, 2.5)           | 2.2 (0.5, 3.8)       | 1.6 (0.3, 2.8)       | 0.9 (-0.2, 2.1)      | 0.6 (-0.7, 1.8)      |
| <b>India</b>                            |                          |                      |                      |                      |                      |                          |                      |                      |                      |                      |

| Girls                           | Mean height in 1990 (cm) |                      |                      |                      |                      | Mean height in 2020 (cm) |                      |                      |                      |                      |
|---------------------------------|--------------------------|----------------------|----------------------|----------------------|----------------------|--------------------------|----------------------|----------------------|----------------------|----------------------|
|                                 | Age-standardised         | 5 years              | 10 years             | 15 years             | 19 years             | Age-standardised         | 5 years              | 10 years             | 15 years             | 19 years             |
| rural                           | 133.2 (132.8, 133.6)     | 99.8 (99.3, 100.4)   | 127.6 (127.1, 128.2) | 149.0 (148.5, 149.6) | 151.9 (151.4, 152.5) | 137.6 (136.8, 138.4)     | 106.6 (104.9, 108.3) | 132.6 (131.7, 133.5) | 152.2 (151.5, 152.8) | 154.5 (153.9, 155.2) |
| urban                           | 134.9 (134.2, 135.6)     | 102.5 (101.6, 103.4) | 129.6 (128.8, 130.4) | 150.2 (149.5, 151.0) | 152.5 (151.8, 153.3) | 138.9 (138.1, 139.7)     | 108.9 (107.4, 110.6) | 134.2 (133.4, 135.2) | 153.1 (152.4, 153.8) | 154.8 (154.1, 155.6) |
| urban-rural difference          | 1.6 (1.0, 2.3)           | 2.7 (1.9, 3.5)       | 1.9 (1.3, 2.6)       | 1.2 (0.6, 1.8)       | 0.6 (0.0, 1.2)       | 1.3 (0.9, 1.8)           | 2.4 (1.7, 3.0)       | 1.6 (1.1, 2.1)       | 0.9 (0.4, 1.3)       | 0.3 (-0.2, 0.8)      |
| <b>Nepal</b>                    |                          |                      |                      |                      |                      |                          |                      |                      |                      |                      |
| rural                           | 135.5 (133.7, 137.4)     | 104.6 (99.9, 109.4)  | 131.5 (129.3, 133.8) | 149.8 (148.4, 151.2) | 150.4 (148.8, 152.0) | 137.4 (135.2, 139.6)     | 107.2 (101.8, 112.8) | 133.5 (130.9, 136.2) | 151.3 (150.1, 152.6) | 151.8 (150.8, 152.9) |
| urban                           | 137.0 (135.2, 138.9)     | 106.8 (102.2, 111.5) | 133.2 (130.9, 135.5) | 150.9 (149.5, 152.4) | 151.2 (149.6, 152.8) | 138.7 (136.5, 140.9)     | 109.2 (103.7, 114.9) | 135.0 (132.3, 137.7) | 152.3 (151.0, 153.6) | 152.5 (151.4, 153.5) |
| urban-rural difference          | 1.5 (0.6, 2.4)           | 2.2 (0.7, 3.7)       | 1.7 (0.6, 2.7)       | 1.2 (0.4, 1.9)       | 0.8 (0.1, 1.6)       | 1.3 (0.4, 2.1)           | 2.0 (0.5, 3.5)       | 1.5 (0.5, 2.5)       | 1.0 (0.3, 1.6)       | 0.6 (0.0, 1.2)       |
| <b>Pakistan</b>                 |                          |                      |                      |                      |                      |                          |                      |                      |                      |                      |
| rural                           | 136.6 (135.2, 138.0)     | 103.6 (102.0, 105.2) | 131.9 (130.5, 133.3) | 151.7 (150.3, 153.2) | 154.0 (152.3, 155.8) | 135.6 (134.3, 136.9)     | 102.4 (100.1, 104.8) | 130.6 (129.2, 132.1) | 150.8 (149.6, 151.9) | 153.8 (152.5, 155.0) |
| urban                           | 137.7 (136.3, 139.1)     | 105.3 (103.7, 106.9) | 133.2 (131.7, 134.6) | 152.6 (151.1, 154.1) | 154.5 (152.7, 156.3) | 136.8 (135.5, 138.1)     | 104.2 (101.8, 106.6) | 132.0 (130.5, 133.4) | 151.7 (150.5, 152.9) | 154.3 (153.1, 155.6) |
| urban-rural difference          | 1.1 (0.4, 1.8)           | 1.7 (0.7, 2.7)       | 1.3 (0.5, 2.0)       | 0.8 (0.1, 1.6)       | 0.5 (-0.4, 1.4)      | 1.2 (0.5, 1.8)           | 1.7 (0.8, 2.8)       | 1.3 (0.6, 2.1)       | 0.9 (0.3, 1.6)       | 0.6 (-0.2, 1.3)      |
| <b>Sri Lanka</b>                |                          |                      |                      |                      |                      |                          |                      |                      |                      |                      |
| rural                           | 136.8 (133.9, 139.6)     | 105.2 (100.5, 110.0) | 132.2 (129.2, 135.2) | 151.4 (148.4, 154.4) | 152.9 (149.3, 156.4) | 138.8 (136.3, 141.3)     | 107.2 (101.6, 112.8) | 134.3 (131.2, 137.3) | 153.5 (151.6, 155.2) | 155.1 (153.4, 157.0) |
| urban                           | 138.3 (135.3, 141.3)     | 107.5 (102.7, 112.3) | 134.0 (130.7, 137.2) | 152.6 (149.4, 155.8) | 153.6 (149.8, 157.4) | 140.2 (137.4, 142.9)     | 109.4 (103.7, 115.0) | 135.9 (132.6, 139.1) | 154.5 (152.3, 156.6) | 155.7 (153.6, 158.0) |
| urban-rural difference          | 1.5 (0.0, 3.1)           | 2.3 (0.6, 4.1)       | 1.8 (0.3, 3.4)       | 1.2 (-0.4, 2.8)      | 0.8 (-1.1, 2.6)      | 1.4 (-0.1, 2.9)          | 2.2 (0.4, 3.9)       | 1.6 (0.1, 3.1)       | 1.0 (-0.5, 2.6)      | 0.6 (-1.1, 2.4)      |
| <b>Sub-Saharan Africa</b>       |                          |                      |                      |                      |                      |                          |                      |                      |                      |                      |
| <b>Central Africa</b>           |                          |                      |                      |                      |                      |                          |                      |                      |                      |                      |
| <b>Angola</b>                   |                          |                      |                      |                      |                      |                          |                      |                      |                      |                      |
| rural                           | 138.6 (134.5, 142.7)     | 105.1 (99.4, 111.0)  | 133.7 (129.4, 138.0) | 153.9 (149.6, 158.1) | 156.1 (151.1, 161.3) | 139.3 (135.3, 143.1)     | 106.7 (99.8, 113.7)  | 134.5 (130.1, 139.0) | 154.2 (150.7, 157.5) | 156.1 (152.5, 159.7) |
| urban                           | 140.9 (136.9, 144.8)     | 108.2 (102.4, 113.9) | 136.2 (132.0, 140.3) | 155.9 (151.7, 160.1) | 157.7 (152.7, 162.7) | 141.4 (137.5, 145.2)     | 109.5 (102.8, 116.4) | 136.8 (132.4, 141.3) | 155.9 (152.6, 159.2) | 157.4 (154.0, 160.9) |
| urban-rural difference          | 2.3 (0.6, 3.9)           | 3.0 (1.0, 5.0)       | 2.5 (0.8, 4.2)       | 2.0 (0.3, 3.7)       | 1.6 (-0.3, 3.5)      | 2.1 (0.4, 3.8)           | 2.8 (0.6, 5.0)       | 2.3 (0.5, 4.1)       | 1.8 (0.1, 3.4)       | 1.4 (-0.3, 3.0)      |
| <b>Central African Republic</b> |                          |                      |                      |                      |                      |                          |                      |                      |                      |                      |
| rural                           | 140.9 (137.1, 144.9)     | 106.9 (100.8, 113.0) | 135.5 (131.0, 140.1) | 156.5 (152.5, 160.4) | 160.3 (156.0, 164.6) | 141.5 (137.0, 146.0)     | 108.0 (100.7, 115.6) | 136.1 (130.8, 141.6) | 156.7 (152.7, 160.8) | 160.3 (157.1, 163.5) |
| urban                           | 143.6 (139.7, 147.6)     | 110.1 (104.0, 116.1) | 138.2 (133.7, 143.0) | 158.8 (154.9, 162.9) | 162.3 (158.0, 166.8) | 143.9 (139.5, 148.4)     | 111.0 (103.7, 118.5) | 138.7 (133.6, 144.0) | 158.9 (154.9, 162.9) | 162.2 (158.9, 165.4) |
| urban-rural difference          | 2.6 (0.9, 4.4)           | 3.2 (1.2, 5.1)       | 2.8 (1.0, 4.5)       | 2.4 (0.5, 4.2)       | 2.0 (0.0, 4.1)       | 2.4 (0.5, 4.2)           | 3.0 (0.7, 5.2)       | 2.6 (0.7, 4.5)       | 2.2 (0.3, 4.0)       | 1.8 (-0.1, 3.8)      |
| <b>Congo</b>                    |                          |                      |                      |                      |                      |                          |                      |                      |                      |                      |
| rural                           | 140.0 (138.5, 141.6)     | 105.6 (103.4, 107.8) | 134.8 (133.0, 136.6) | 155.8 (154.2, 157.4) | 158.5 (156.8, 160.2) | 140.3 (137.4, 143.1)     | 107.2 (102.4, 112.1) | 135.4 (132.1, 138.7) | 155.4 (153.2, 157.7) | 157.6 (155.6, 159.7) |
| urban                           | 142.6 (141.2, 144.1)     | 108.7 (107.0, 110.5) | 137.5 (135.9, 139.2) | 158.1 (156.6, 159.6) | 160.5 (158.9, 162.1) | 142.7 (139.9, 145.5)     | 110.2 (105.5, 114.8) | 138.0 (134.7, 141.2) | 157.6 (155.4, 159.8) | 159.5 (157.4, 161.5) |
| urban-rural difference          | 2.6 (1.4, 3.7)           | 3.1 (1.4, 4.7)       | 2.7 (1.4, 4.0)       | 2.3 (1.2, 3.5)       | 2.0 (0.7, 3.3)       | 2.4 (1.1, 3.8)           | 2.9 (0.9, 4.9)       | 2.6 (1.1, 4.1)       | 2.2 (1.0, 3.4)       | 1.9 (0.8, 3.0)       |
| <b>DR Congo</b>                 |                          |                      |                      |                      |                      |                          |                      |                      |                      |                      |
| rural                           | 137.3 (135.0, 139.5)     | 104.2 (99.4, 109.1)  | 132.2 (129.6, 134.8) | 152.3 (150.2, 154.5) | 155.1 (152.6, 157.6) | 137.6 (134.7, 140.5)     | 105.3 (99.1, 111.6)  | 132.7 (129.3, 136.2) | 152.3 (150.3, 154.2) | 154.8 (153.0, 156.6) |
| urban                           | 141.1 (138.9, 143.2)     | 108.4 (103.7, 113.2) | 136.1 (133.6, 138.6) | 156.0 (153.9, 158.2) | 158.6 (156.1, 161.0) | 141.2 (138.4, 144.0)     | 109.3 (103.2, 115.4) | 136.4 (133.0, 139.7) | 155.8 (153.8, 157.7) | 158.1 (156.3, 159.8) |
| urban-rural difference          | 3.8 (2.6, 4.9)           | 4.1 (2.4, 5.8)       | 3.9 (2.6, 5.1)       | 3.7 (2.6, 4.7)       | 3.5 (2.3, 4.6)       | 3.6 (2.4, 4.9)           | 3.9 (2.0, 5.9)       | 3.7 (2.3, 5.1)       | 3.5 (2.4, 4.6)       | 3.3 (2.3, 4.3)       |
| <b>Equatorial Guinea</b>        |                          |                      |                      |                      |                      |                          |                      |                      |                      |                      |
| rural                           | 139.5 (133.9, 145.0)     | 105.8 (98.9, 112.8)  | 134.3 (128.8, 139.8) | 154.8 (148.9, 160.6) | 157.8 (149.9, 165.6) | 140.1 (134.4, 145.9)     | 107.3 (99.6, 115.0)  | 135.2 (129.2, 141.1) | 155.1 (149.3, 160.8) | 157.9 (150.6, 165.3) |
| urban                           | 142.1 (136.6, 147.7)     | 109.1 (102.4, 115.8) | 137.1 (131.7, 142.5) | 157.2 (151.2, 163.0) | 159.8 (152.0, 167.7) | 142.6 (136.8, 148.3)     | 110.3 (102.4, 118.0) | 137.8 (131.8, 143.6) | 157.3 (151.6, 162.9) | 159.7 (152.6, 167.2) |
| urban-rural difference          | 2.6 (0.9, 4.4)           | 3.2 (1.2, 5.2)       | 2.8 (1.0, 4.5)       | 2.4 (0.5, 4.2)       | 2.1 (0.0, 4.2)       | 2.4 (0.6, 4.2)           | 3.0 (0.8, 5.3)       | 2.6 (0.7, 4.5)       | 2.2 (0.3, 4.0)       | 1.9 (-0.1, 3.8)      |
| <b>Gabon</b>                    |                          |                      |                      |                      |                      |                          |                      |                      |                      |                      |
| rural                           | 139.6 (137.0, 142.2)     | 106.2 (100.7, 111.6) | 134.6 (131.5, 137.7) | 154.9 (152.4, 157.2) | 157.4 (154.8, 159.9) | 140.3 (137.2, 143.5)     | 107.3 (100.6, 114.1) | 135.3 (131.5, 139.1) | 155.4 (153.0, 157.7) | 157.9 (155.6, 160.1) |
| urban                           | 142.5 (139.9, 145.0)     | 109.5 (104.2, 114.8) | 137.6 (134.5, 140.6) | 157.6 (155.2, 159.8) | 159.8 (157.3, 162.3) | 143.0 (139.8, 146.1)     | 110.4 (103.9, 117.1) | 138.1 (134.2, 141.8) | 157.8 (155.6, 160.1) | 160.1 (157.9, 162.3) |
| urban-rural difference          | 2.9 (1.6, 4.2)           | 3.4 (1.6, 5.1)       | 3.0 (1.7, 4.4)       | 2.7 (1.4, 3.9)       | 2.4 (1.0, 3.8)       | 2.7 (1.3, 4.1)           | 3.2 (1.1, 5.2)       | 2.8 (1.3, 4.4)       | 2.5 (1.2, 3.7)       | 2.2 (1.0, 3.4)       |
| <b>East Africa</b>              |                          |                      |                      |                      |                      |                          |                      |                      |                      |                      |
| <b>Burundi</b>                  |                          |                      |                      |                      |                      |                          |                      |                      |                      |                      |
| rural                           | 138.3 (135.4, 141.1)     | 104.8 (100.0, 109.6) | 133.9 (130.9, 136.9) | 153.2 (150.1, 156.2) | 155.8 (152.0, 159.6) | 138.8 (136.3, 141.3)     | 107.0 (101.5, 112.9) | 134.7 (131.8, 137.8) | 152.9 (151.1, 154.6) | 155.0 (153.3, 156.7) |
| urban                           | 140.7 (137.9, 143.6)     | 107.5 (102.8, 112.3) | 136.4 (133.3, 139.4) | 155.4 (152.3, 158.5) | 157.8 (154.0, 161.6) | 141.1 (138.6, 143.6)     | 109.6 (104.2, 115.6) | 137.1 (134.1, 140.2) | 154.9 (153.2, 156.7) | 156.9 (155.2, 158.6) |
| urban-rural difference          | 2.4 (1.3, 3.5)           | 2.7 (1.2, 4.3)       | 2.5 (1.3, 3.7)       | 2.2 (1.2, 3.2)       | 2.0 (0.9, 3.2)       | 2.3 (1.3, 3.3)           | 2.6 (1.1, 4.2)       | 2.4 (1.2, 3.5)       | 2.1 (1.2, 3.0)       | 1.9 (0.9, 2.9)       |
| <b>Comoros</b>                  |                          |                      |                      |                      |                      |                          |                      |                      |                      |                      |
| rural                           | 138.8 (136.4, 141.1)     | 106.0 (101.1, 110.9) | 134.7 (131.7, 137.6) | 153.3 (151.2, 155.4) | 155.0 (153.1, 156.9) | 140.5 (137.6, 143.3)     | 108.2 (102.3, 114.0) | 136.4 (132.8, 139.8) | 154.8 (152.5, 156.9) | 156.7 (154.7, 158.8) |
| urban                           | 140.0 (137.6, 142.5)     | 107.9 (103.0, 112.8) | 136.1 (133.1, 139.1) | 154.3 (152.1, 156.4) | 155.6 (153.7, 157.6) | 141.6 (138.7, 144.4)     | 110.0 (104.0, 115.9) | 137.7 (134.2, 141.1) | 155.6 (153.4, 157.7) | 157.2 (155.2, 159.3) |
| urban-rural difference          | 1.3 (0.2, 2.3)           | 1.9 (0.5, 3.5)       | 1.4 (0.3, 2.6)       | 1.0 (0.0, 2.0)       | 0.6 (-0.5, 1.8)      | 1.1 (0.0, 2.2)           | 1.8 (0.2, 3.4)       | 1.3 (0.1, 2.5)       | 0.8 (-0.2, 1.8)      | 0.5 (-0.6, 1.6)      |
| <b>Djibouti</b>                 |                          |                      |                      |                      |                      |                          |                      |                      |                      |                      |

| Girls                  | Mean height in 1990 (cm) |                      |                      |                      |                      | Mean height in 2020 (cm) |                      |                      |                      |                      |
|------------------------|--------------------------|----------------------|----------------------|----------------------|----------------------|--------------------------|----------------------|----------------------|----------------------|----------------------|
|                        | Age-standardised         | 5 years              | 10 years             | 15 years             | 19 years             | Age-standardised         | 5 years              | 10 years             | 15 years             | 19 years             |
| rural                  | 140.2 (135.0, 145.6)     | 106.7 (100.4, 113.1) | 135.8 (130.7, 141.0) | 155.1 (149.4, 160.8) | 157.6 (150.0, 165.3) | 141.3 (135.9, 146.6)     | 109.0 (101.9, 116.1) | 137.1 (131.8, 142.4) | 155.6 (150.0, 160.9) | 157.8 (150.9, 164.9) |
| urban                  | 141.7 (136.6, 147.1)     | 108.8 (102.5, 115.2) | 137.5 (132.4, 142.6) | 156.3 (150.7, 162.2) | 158.5 (151.1, 166.2) | 142.7 (137.3, 147.9)     | 111.0 (103.9, 118.0) | 138.7 (133.4, 144.0) | 156.7 (151.2, 162.0) | 158.6 (151.9, 165.6) |
| urban-rural difference | 1.5 (0.1, 3.0)           | 2.2 (0.5, 3.9)       | 1.7 (0.2, 3.2)       | 1.2 (-0.3, 2.8)      | 0.9 (-0.8, 2.7)      | 1.4 (0.0, 2.9)           | 2.0 (0.3, 3.8)       | 1.6 (0.1, 3.1)       | 1.1 (-0.4, 2.6)      | 0.8 (-0.9, 2.4)      |
| <b>Eritrea</b>         |                          |                      |                      |                      |                      |                          |                      |                      |                      |                      |
| rural                  | 139.9 (137.2, 142.7)     | 106.8 (101.9, 111.9) | 135.8 (132.5, 139.2) | 154.6 (152.1, 157.2) | 156.2 (154.3, 158.2) | 141.2 (137.8, 144.6)     | 108.9 (102.6, 115.2) | 137.2 (133.1, 141.2) | 155.6 (152.6, 158.4) | 157.2 (154.7, 159.8) |
| urban                  | 141.4 (138.7, 144.3)     | 109.0 (103.9, 114.1) | 137.5 (134.1, 141.0) | 155.9 (153.2, 158.6) | 157.2 (154.9, 159.5) | 142.6 (139.1, 146.2)     | 111.0 (104.5, 117.3) | 138.8 (134.5, 143.0) | 156.7 (153.7, 159.7) | 158.0 (155.4, 160.7) |
| urban-rural difference | 1.5 (0.1, 3.0)           | 2.2 (0.5, 3.9)       | 1.7 (0.3, 3.2)       | 1.3 (-0.2, 2.8)      | 0.9 (-0.8, 2.7)      | 1.4 (0.0, 2.9)           | 2.0 (0.3, 3.8)       | 1.6 (0.1, 3.1)       | 1.1 (-0.3, 2.6)      | 0.8 (-0.8, 2.5)      |
| <b>Ethiopia</b>        |                          |                      |                      |                      |                      |                          |                      |                      |                      |                      |
| rural                  | 138.8 (136.8, 140.7)     | 105.0 (100.4, 109.5) | 134.2 (131.8, 136.4) | 153.9 (152.1, 155.6) | 156.7 (154.6, 158.7) | 140.7 (138.3, 143.0)     | 108.2 (102.4, 113.6) | 136.4 (133.4, 139.1) | 155.2 (153.7, 156.7) | 157.6 (156.3, 158.9) |
| urban                  | 140.0 (138.0, 142.0)     | 106.9 (102.3, 111.6) | 135.6 (133.2, 137.9) | 154.8 (153.0, 156.5) | 157.2 (155.2, 159.2) | 141.7 (139.4, 144.0)     | 110.0 (104.2, 115.5) | 137.6 (134.6, 140.4) | 155.9 (154.4, 157.3) | 157.9 (156.6, 159.2) |
| urban-rural difference | 1.2 (0.3, 2.1)           | 1.9 (0.5, 3.5)       | 1.4 (0.4, 2.5)       | 0.9 (0.1, 1.7)       | 0.5 (-0.3, 1.3)      | 1.0 (0.1, 1.9)           | 1.7 (0.3, 3.2)       | 1.2 (0.2, 2.2)       | 0.7 (0.0, 1.4)       | 0.3 (-0.4, 1.0)      |
| <b>Kenya</b>           |                          |                      |                      |                      |                      |                          |                      |                      |                      |                      |
| rural                  | 142.8 (140.8, 144.6)     | 109.2 (104.9, 113.6) | 138.3 (136.0, 140.6) | 157.7 (156.0, 159.4) | 160.2 (158.3, 162.1) | 143.5 (141.1, 145.9)     | 111.9 (106.5, 117.4) | 139.5 (136.6, 142.4) | 157.5 (155.8, 159.2) | 159.5 (157.9, 161.0) |
| urban                  | 143.8 (141.9, 145.7)     | 111.2 (106.9, 115.6) | 139.6 (137.4, 141.9) | 158.4 (156.6, 160.1) | 160.4 (158.5, 162.3) | 144.5 (142.1, 146.8)     | 113.8 (108.4, 119.1) | 140.7 (137.9, 143.6) | 158.1 (156.4, 159.8) | 159.5 (158.0, 161.1) |
| urban-rural difference | 1.1 (0.2, 2.0)           | 2.0 (0.5, 3.4)       | 1.3 (0.3, 2.4)       | 0.7 (-0.1, 1.5)      | 0.2 (-0.7, 1.0)      | 1.0 (0.1, 1.9)           | 1.9 (0.4, 3.4)       | 1.2 (0.2, 2.3)       | 0.6 (-0.2, 1.3)      | 0.1 (-0.7, 0.9)      |
| <b>Madagascar</b>      |                          |                      |                      |                      |                      |                          |                      |                      |                      |                      |
| rural                  | 136.1 (134.1, 138.3)     | 102.9 (98.3, 107.7)  | 131.9 (129.4, 134.5) | 150.9 (149.1, 152.8) | 153.0 (151.3, 154.8) | 137.1 (134.2, 140.1)     | 105.6 (99.6, 111.6)  | 133.2 (129.7, 136.8) | 151.1 (148.9, 153.4) | 152.8 (150.7, 155.0) |
| urban                  | 137.7 (135.6, 140.0)     | 105.1 (100.5, 109.9) | 133.7 (131.1, 136.3) | 152.2 (150.3, 154.1) | 154.0 (152.1, 155.8) | 138.6 (135.6, 141.6)     | 107.7 (101.8, 113.8) | 134.8 (131.3, 138.4) | 152.3 (150.1, 154.5) | 153.7 (151.6, 155.8) |
| urban-rural difference | 1.6 (0.6, 2.6)           | 2.2 (0.7, 3.8)       | 1.8 (0.7, 2.9)       | 1.3 (0.4, 2.2)       | 1.0 (0.0, 1.9)       | 1.5 (0.4, 2.5)           | 2.1 (0.5, 3.7)       | 1.6 (0.5, 2.8)       | 1.2 (0.3, 2.1)       | 0.8 (-0.1, 1.8)      |
| <b>Malawi</b>          |                          |                      |                      |                      |                      |                          |                      |                      |                      |                      |
| rural                  | 138.5 (136.5, 140.5)     | 105.0 (100.4, 109.7) | 134.0 (131.7, 136.4) | 153.4 (151.6, 155.2) | 155.9 (153.8, 157.9) | 139.8 (137.4, 142.3)     | 107.8 (102.2, 113.4) | 135.7 (132.6, 138.7) | 154.0 (152.5, 155.6) | 156.1 (154.8, 157.4) |
| urban                  | 140.2 (138.1, 142.2)     | 107.2 (102.6, 111.9) | 135.8 (133.4, 138.3) | 154.8 (153.0, 156.6) | 157.0 (155.0, 159.1) | 141.3 (138.9, 143.7)     | 109.8 (104.3, 115.5) | 137.3 (134.4, 140.3) | 155.3 (153.7, 156.9) | 157.1 (155.8, 158.5) |
| urban-rural difference | 1.7 (0.8, 2.6)           | 2.2 (0.7, 3.7)       | 1.8 (0.8, 2.9)       | 1.5 (0.7, 2.2)       | 1.2 (0.3, 2.0)       | 1.5 (0.6, 2.4)           | 2.0 (0.5, 3.5)       | 1.7 (0.6, 2.7)       | 1.3 (0.5, 2.0)       | 1.0 (0.2, 1.7)       |
| <b>Mauritius</b>       |                          |                      |                      |                      |                      |                          |                      |                      |                      |                      |
| rural                  | 143.4 (141.2, 145.6)     | 111.7 (107.2, 116.3) | 140.1 (137.6, 142.7) | 157.5 (155.4, 159.5) | 157.4 (155.3, 159.5) | 145.8 (143.8, 147.8)     | 114.8 (109.8, 120.0) | 142.7 (140.4, 145.0) | 159.6 (158.0, 161.1) | 159.5 (158.1, 161.0) |
| urban                  | 144.9 (142.7, 147.1)     | 113.7 (109.3, 118.4) | 141.8 (139.2, 144.5) | 158.7 (156.6, 160.6) | 158.4 (156.3, 160.6) | 147.2 (145.1, 149.3)     | 116.8 (111.6, 121.9) | 144.2 (141.8, 146.7) | 160.6 (158.9, 162.2) | 160.4 (158.9, 161.9) |
| urban-rural difference | 1.5 (0.3, 2.7)           | 2.1 (0.5, 3.7)       | 1.7 (0.4, 3.0)       | 1.2 (0.0, 2.4)       | 1.1 (-0.2, 2.3)      | 1.4 (0.1, 2.6)           | 1.9 (0.3, 3.6)       | 1.5 (0.2, 2.8)       | 1.0 (-0.2, 2.3)      | 0.9 (-0.3, 2.1)      |
| <b>Mozambique</b>      |                          |                      |                      |                      |                      |                          |                      |                      |                      |                      |
| rural                  | 140.1 (138.3, 141.9)     | 110.2 (106.3, 114.2) | 136.6 (134.6, 138.7) | 153.2 (151.5, 154.9) | 154.7 (152.9, 156.4) | 140.4 (138.3, 142.4)     | 111.6 (106.8, 116.4) | 137.0 (134.5, 139.5) | 152.9 (151.3, 154.5) | 154.3 (152.7, 156.0) |
| urban                  | 142.8 (141.1, 144.5)     | 113.4 (109.5, 117.4) | 139.4 (137.4, 141.4) | 155.6 (154.0, 157.3) | 156.8 (155.1, 158.5) | 142.9 (140.9, 144.9)     | 114.7 (110.0, 119.2) | 139.7 (137.3, 142.1) | 155.2 (153.6, 156.8) | 156.3 (154.8, 157.9) |
| urban-rural difference | 2.7 (1.7, 3.6)           | 3.2 (1.8, 4.7)       | 2.8 (1.8, 3.9)       | 2.4 (1.6, 3.2)       | 2.1 (1.2, 3.0)       | 2.5 (1.6, 3.5)           | 3.1 (1.6, 4.6)       | 2.7 (1.6, 3.8)       | 2.3 (1.5, 3.1)       | 2.0 (1.1, 2.8)       |
| <b>Rwanda</b>          |                          |                      |                      |                      |                      |                          |                      |                      |                      |                      |
| rural                  | 138.5 (136.5, 140.5)     | 104.0 (99.3, 108.7)  | 133.5 (131.2, 135.8) | 153.8 (152.0, 155.6) | 157.5 (155.5, 159.6) | 139.4 (137.3, 141.5)     | 107.3 (101.9, 112.7) | 135.0 (132.4, 137.6) | 153.6 (152.4, 154.9) | 156.4 (155.2, 157.6) |
| urban                  | 140.6 (138.6, 142.7)     | 106.6 (102.0, 111.5) | 135.8 (133.4, 138.2) | 155.8 (154.0, 157.6) | 159.2 (157.2, 161.3) | 141.5 (139.3, 143.6)     | 109.9 (104.5, 115.4) | 137.2 (134.5, 139.9) | 155.5 (154.2, 156.8) | 158.0 (156.7, 159.2) |
| urban-rural difference | 2.2 (1.3, 3.1)           | 2.7 (1.2, 4.1)       | 2.3 (1.3, 3.4)       | 2.0 (1.2, 2.7)       | 1.7 (0.9, 2.5)       | 2.1 (1.2, 2.9)           | 2.6 (1.1, 4.1)       | 2.2 (1.2, 3.2)       | 1.9 (1.1, 2.5)       | 1.6 (0.9, 2.3)       |
| <b>Seychelles</b>      |                          |                      |                      |                      |                      |                          |                      |                      |                      |                      |
| rural                  | 145.6 (144.3, 147.0)     | 110.6 (109.5, 111.7) | 142.5 (141.2, 143.8) | 160.7 (159.0, 162.5) | 160.8 (158.3, 163.3) | 147.1 (146.4, 147.9)     | 114.0 (112.7, 115.4) | 144.3 (143.5, 145.0) | 161.3 (160.5, 162.1) | 161.3 (160.4, 162.5) |
| urban                  | 145.2 (143.7, 146.5)     | 110.4 (109.2, 111.5) | 142.0 (140.8, 143.3) | 160.1 (158.4, 161.9) | 160.2 (157.6, 162.7) | 146.6 (145.9, 147.4)     | 113.7 (112.4, 115.1) | 143.8 (143.0, 144.6) | 160.7 (159.8, 161.5) | 160.7 (159.7, 161.8) |
| urban-rural difference | -0.5 (-1.0, 0.1)         | -0.3 (-0.9, 0.4)     | -0.4 (-1.0, 0.1)     | -0.6 (-1.2, 0.0)     | -0.6 (-1.4, 0.1)     | -0.5 (-0.9, -0.1)        | -0.3 (-0.9, 0.3)     | -0.4 (-0.9, 0.0)     | -0.6 (-1.2, -0.1)    | -0.7 (-1.2, -0.1)    |
| <b>Somalia</b>         |                          |                      |                      |                      |                      |                          |                      |                      |                      |                      |
| rural                  | 141.4 (137.2, 145.4)     | 107.5 (101.6, 113.3) | 136.7 (132.3, 141.0) | 156.4 (152.0, 160.6) | 159.6 (154.3, 164.9) | 142.4 (138.2, 146.5)     | 109.7 (103.0, 116.2) | 138.0 (133.2, 142.5) | 156.9 (153.0, 160.7) | 159.9 (156.0, 163.7) |
| urban                  | 143.0 (138.9, 146.9)     | 109.7 (103.8, 115.4) | 138.5 (134.2, 142.7) | 157.7 (153.4, 161.9) | 160.5 (155.4, 165.7) | 143.8 (139.6, 147.8)     | 111.7 (105.0, 118.3) | 139.6 (134.8, 144.1) | 158.0 (154.3, 161.7) | 160.7 (157.1, 164.2) |
| urban-rural difference | 1.6 (0.1, 3.0)           | 2.2 (0.5, 3.9)       | 1.7 (0.3, 3.2)       | 1.3 (-0.3, 2.8)      | 1.0 (-0.8, 2.7)      | 1.4 (0.0, 2.9)           | 2.1 (0.3, 3.8)       | 1.6 (0.1, 3.1)       | 1.2 (-0.3, 2.7)      | 0.8 (-0.9, 2.5)      |
| <b>South Sudan</b>     |                          |                      |                      |                      |                      |                          |                      |                      |                      |                      |
| rural                  | 143.7 (139.5, 148.1)     | 109.4 (103.3, 115.3) | 138.8 (134.3, 143.4) | 158.9 (154.5, 163.4) | 162.8 (157.4, 168.3) | 145.1 (140.9, 149.4)     | 111.7 (104.9, 118.6) | 140.3 (135.6, 145.2) | 159.9 (155.9, 163.8) | 163.7 (159.7, 167.9) |
| urban                  | 145.4 (141.4, 149.7)     | 111.7 (105.6, 117.6) | 140.6 (136.2, 145.3) | 160.3 (156.2, 164.8) | 163.9 (158.7, 169.3) | 146.7 (142.5, 150.9)     | 113.9 (107.0, 120.6) | 142.0 (137.4, 146.9) | 161.2 (157.5, 165.0) | 164.7 (160.8, 168.6) |
| urban-rural difference | 1.7 (0.2, 3.2)           | 2.3 (0.6, 4.0)       | 1.8 (0.4, 3.4)       | 1.4 (-0.1, 3.0)      | 1.1 (-0.6, 2.9)      | 1.5 (0.1, 3.0)           | 2.1 (0.3, 3.9)       | 1.7 (0.2, 3.2)       | 1.3 (-0.2, 2.8)      | 1.0 (-0.7, 2.6)      |
| <b>Sudan</b>           |                          |                      |                      |                      |                      |                          |                      |                      |                      |                      |
| rural                  | 141.4 (138.0, 144.7)     | 107.3 (101.9, 112.8) | 136.5 (132.5, 140.4) | 156.4 (153.1, 159.7) | 160.4 (157.1, 163.7) | 141.9 (138.5, 145.4)     | 109.0 (102.6, 115.3) | 137.2 (133.0, 141.5) | 156.4 (153.6, 159.4) | 160.4 (158.4, 162.5) |
| urban                  | 142.8 (139.4, 146.2)     | 109.4 (104.0, 114.7) | 138.1 (134.1, 142.1) | 157.5 (154.2, 160.9) | 161.2 (157.9, 164.6) | 143.2 (139.7, 146.8)     | 110.9 (104.4, 117.3) | 138.7 (134.4, 143.1) | 157.4 (154.5, 160.3) | 161.1 (159.0, 163.1) |
| urban-rural difference | 1.4 (0.2, 2.7)           | 2.1 (0.5, 3.8)       | 1.6 (0.3, 3.0)       | 1.1 (-0.1, 2.4)      | 0.8 (-0.6, 2.2)      | 1.3 (0.0, 2.6)           | 2.0 (0.2, 3.7)       | 1.5 (0.1, 2.8)       | 1.0 (-0.2, 2.2)      | 0.6 (-0.6, 1.9)      |

| Girls                  | Mean height in 1990 (cm) |                      |                      |                      |                      | Mean height in 2020 (cm) |                      |                      |                      |                      |
|------------------------|--------------------------|----------------------|----------------------|----------------------|----------------------|--------------------------|----------------------|----------------------|----------------------|----------------------|
|                        | Age-standardised         | 5 years              | 10 years             | 15 years             | 19 years             | Age-standardised         | 5 years              | 10 years             | 15 years             | 19 years             |
| <b>Tanzania</b>        |                          |                      |                      |                      |                      |                          |                      |                      |                      |                      |
| rural                  | 137.8 (136.1, 139.5)     | 103.0 (99.3, 106.6)  | 132.8 (130.7, 134.9) | 153.4 (151.7, 155.1) | 156.6 (155.0, 158.3) | 139.0 (136.9, 141.2)     | 105.7 (100.9, 110.5) | 134.3 (131.8, 136.9) | 154.0 (152.4, 155.6) | 156.9 (155.4, 158.5) |
| urban                  | 138.7 (137.0, 140.5)     | 104.9 (101.1, 108.8) | 134.0 (131.9, 136.2) | 153.9 (152.3, 155.6) | 156.6 (155.0, 158.2) | 139.9 (137.7, 142.0)     | 107.4 (102.6, 112.3) | 135.4 (132.8, 138.1) | 154.4 (152.8, 156.0) | 156.7 (155.1, 158.3) |
| urban-rural difference | 1.0 (0.0, 1.9)           | 1.9 (0.5, 3.4)       | 1.2 (0.2, 2.3)       | 0.5 (-0.3, 1.4)      | 0.0 (-0.9, 0.9)      | 0.8 (-0.1, 1.8)          | 1.8 (0.3, 3.3)       | 1.1 (0.0, 2.2)       | 0.4 (-0.4, 1.2)      | -0.1 (-0.9, 0.6)     |
| <b>Uganda</b>          |                          |                      |                      |                      |                      |                          |                      |                      |                      |                      |
| rural                  | 139.2 (137.6, 140.8)     | 103.4 (100.9, 105.9) | 133.8 (132.0, 135.7) | 155.5 (153.7, 157.4) | 158.5 (156.3, 160.7) | 139.8 (138.1, 141.5)     | 105.3 (102.4, 108.3) | 134.7 (132.5, 136.8) | 155.5 (154.0, 157.0) | 158.2 (156.9, 159.5) |
| urban                  | 140.5 (138.8, 142.2)     | 105.8 (103.0, 108.6) | 135.4 (133.5, 137.4) | 156.3 (154.5, 158.2) | 158.7 (156.5, 161.0) | 141.0 (139.2, 142.8)     | 107.6 (104.3, 111.0) | 136.3 (134.0, 138.6) | 156.3 (154.8, 157.8) | 158.4 (157.1, 159.7) |
| urban-rural difference | 1.3 (0.4, 2.2)           | 2.4 (0.9, 3.9)       | 1.6 (0.5, 2.7)       | 0.8 (0.0, 1.6)       | 0.2 (-0.6, 1.0)      | 1.3 (0.4, 2.2)           | 2.3 (0.9, 3.9)       | 1.6 (0.6, 2.6)       | 0.8 (0.0, 1.5)       | 0.2 (-0.6, 0.9)      |
| <b>Zambia</b>          |                          |                      |                      |                      |                      |                          |                      |                      |                      |                      |
| rural                  | 139.6 (137.6, 141.5)     | 105.6 (101.1, 110.3) | 135.0 (132.6, 137.4) | 154.7 (153.1, 156.3) | 157.4 (155.8, 159.0) | 140.2 (137.7, 142.8)     | 108.0 (102.5, 113.8) | 136.0 (132.9, 139.2) | 154.6 (152.8, 156.3) | 156.8 (155.3, 158.3) |
| urban                  | 141.8 (139.8, 143.7)     | 108.3 (103.8, 113.0) | 137.3 (135.0, 139.7) | 156.6 (155.1, 158.2) | 159.0 (157.4, 160.6) | 142.2 (139.7, 144.8)     | 110.5 (104.9, 116.3) | 138.2 (135.1, 141.3) | 156.3 (154.6, 158.1) | 158.2 (156.7, 159.7) |
| urban-rural difference | 2.2 (1.3, 3.1)           | 2.7 (1.3, 4.2)       | 2.3 (1.3, 3.4)       | 1.9 (1.2, 2.7)       | 1.6 (0.8, 2.4)       | 2.0 (1.1, 2.9)           | 2.6 (1.0, 4.1)       | 2.2 (1.1, 3.2)       | 1.7 (1.0, 2.5)       | 1.4 (0.6, 2.2)       |
| <b>Southern Africa</b> |                          |                      |                      |                      |                      |                          |                      |                      |                      |                      |
| <b>Botswana</b>        |                          |                      |                      |                      |                      |                          |                      |                      |                      |                      |
| rural                  | 142.8 (139.6, 145.9)     | 108.8 (103.3, 114.2) | 137.1 (133.4, 140.7) | 158.6 (155.5, 161.8) | 161.7 (158.1, 165.4) | 143.0 (139.8, 146.3)     | 109.8 (103.4, 116.4) | 137.5 (133.6, 141.4) | 158.5 (155.9, 161.2) | 161.3 (158.9, 163.8) |
| urban                  | 144.5 (141.4, 147.6)     | 110.9 (105.3, 116.4) | 138.9 (135.2, 142.4) | 160.1 (157.0, 163.3) | 163.0 (159.4, 166.6) | 143.5 (140.3, 146.7)     | 110.6 (104.1, 117.1) | 138.1 (134.1, 141.9) | 158.8 (156.3, 161.4) | 161.4 (159.1, 163.6) |
| urban-rural difference | 1.7 (0.1, 3.4)           | 2.1 (0.3, 3.9)       | 1.8 (0.2, 3.5)       | 1.5 (-0.2, 3.3)      | 1.3 (-0.7, 3.3)      | 0.5 (-1.1, 2.0)          | 0.9 (-1.0, 2.7)      | 0.6 (-1.0, 2.2)      | 0.3 (-1.4, 1.9)      | 0.1 (-1.7, 1.9)      |
| <b>Lesotho</b>         |                          |                      |                      |                      |                      |                          |                      |                      |                      |                      |
| rural                  | 139.5 (136.9, 142.0)     | 106.2 (101.2, 111.1) | 134.1 (131.3, 136.9) | 155.0 (152.3, 157.5) | 157.3 (154.2, 160.4) | 139.9 (137.1, 142.7)     | 107.5 (101.4, 113.8) | 134.8 (131.4, 138.3) | 154.9 (153.0, 156.9) | 156.8 (155.0, 158.6) |
| urban                  | 140.9 (138.2, 143.4)     | 108.0 (103.0, 113.2) | 135.7 (132.8, 138.5) | 156.1 (153.5, 158.7) | 158.2 (155.2, 161.4) | 140.1 (137.2, 143.0)     | 108.2 (102.0, 114.6) | 135.1 (131.6, 138.7) | 154.9 (152.9, 156.9) | 156.5 (154.7, 158.3) |
| urban-rural difference | 1.4 (0.3, 2.5)           | 1.9 (0.3, 3.5)       | 1.5 (0.3, 2.7)       | 1.2 (0.1, 2.3)       | 0.9 (-0.2, 2.1)      | 0.2 (-0.9, 1.3)          | 0.6 (-1.1, 2.4)      | 0.3 (-1.0, 1.5)      | 0.0 (-1.0, 0.9)      | -0.3 (-1.2, 0.6)     |
| <b>Namibia</b>         |                          |                      |                      |                      |                      |                          |                      |                      |                      |                      |
| rural                  | 141.4 (139.0, 143.9)     | 108.1 (103.3, 113.2) | 136.0 (133.4, 138.8) | 157.0 (154.5, 159.4) | 159.3 (156.3, 162.2) | 142.1 (139.2, 145.0)     | 108.7 (102.5, 115.0) | 136.6 (133.2, 140.1) | 157.7 (155.6, 159.7) | 160.2 (158.3, 162.2) |
| urban                  | 142.9 (140.5, 145.3)     | 110.0 (105.2, 114.9) | 137.6 (134.9, 140.3) | 158.3 (155.9, 160.7) | 160.4 (157.4, 163.3) | 142.3 (139.4, 145.2)     | 109.3 (103.1, 115.5) | 136.9 (133.5, 140.3) | 157.7 (155.6, 159.8) | 160.0 (158.1, 162.0) |
| urban-rural difference | 1.5 (0.3, 2.6)           | 1.8 (0.3, 3.4)       | 1.6 (0.3, 2.8)       | 1.3 (0.2, 2.4)       | 1.1 (-0.1, 2.3)      | 0.2 (-1.0, 1.3)          | 0.5 (-1.2, 2.3)      | 0.3 (-1.0, 1.5)      | 0.0 (-1.0, 1.0)      | -0.2 (-1.2, 0.8)     |
| <b>South Africa</b>    |                          |                      |                      |                      |                      |                          |                      |                      |                      |                      |
| rural                  | 141.1 (139.9, 142.3)     | 109.2 (107.9, 110.6) | 135.9 (134.7, 137.2) | 155.9 (154.4, 157.3) | 158.0 (156.2, 159.7) | 140.6 (139.6, 141.6)     | 107.7 (106.2, 109.3) | 135.2 (134.1, 136.3) | 155.9 (155.0, 156.8) | 158.5 (157.4, 159.5) |
| urban                  | 142.8 (141.5, 144.1)     | 111.3 (109.8, 112.8) | 137.8 (136.4, 139.1) | 157.4 (155.9, 158.9) | 159.3 (157.6, 161.1) | 141.0 (140.1, 142.0)     | 108.5 (106.9, 110.0) | 135.7 (134.6, 136.8) | 156.2 (155.2, 157.1) | 158.5 (157.5, 159.6) |
| urban-rural difference | 1.7 (0.9, 2.6)           | 2.1 (1.0, 3.1)       | 1.8 (1.0, 2.7)       | 1.6 (0.8, 2.4)       | 1.4 (0.5, 2.3)       | 0.4 (-0.2, 1.0)          | 0.7 (0.0, 1.5)       | 0.5 (-0.1, 1.1)      | 0.3 (-0.3, 0.8)      | 0.1 (-0.6, 0.7)      |
| <b>Eswatini</b>        |                          |                      |                      |                      |                      |                          |                      |                      |                      |                      |
| rural                  | 140.6 (137.8, 143.5)     | 107.5 (102.3, 112.7) | 135.3 (132.1, 138.5) | 156.0 (153.1, 159.1) | 158.2 (154.7, 161.7) | 141.5 (138.5, 144.5)     | 108.6 (102.1, 114.9) | 136.2 (132.6, 139.9) | 156.8 (154.6, 159.0) | 159.0 (157.0, 161.0) |
| urban                  | 142.3 (139.4, 145.2)     | 109.6 (104.4, 114.8) | 137.1 (133.9, 140.3) | 157.6 (154.5, 160.7) | 159.5 (156.0, 163.0) | 141.9 (138.8, 145.1)     | 109.4 (102.8, 115.8) | 136.8 (133.0, 140.5) | 157.1 (154.7, 159.5) | 159.1 (157.0, 161.2) |
| urban-rural difference | 1.7 (0.5, 3.0)           | 2.1 (0.5, 3.7)       | 1.8 (0.5, 3.1)       | 1.5 (0.3, 2.8)       | 1.3 (0.0, 2.7)       | 0.5 (-0.8, 1.8)          | 0.8 (-1.0, 2.6)      | 0.6 (-0.8, 2.0)      | 0.3 (-0.9, 1.5)      | 0.1 (-1.2, 1.3)      |
| <b>Zimbabwe</b>        |                          |                      |                      |                      |                      |                          |                      |                      |                      |                      |
| rural                  | 140.7 (138.6, 142.9)     | 107.3 (102.3, 112.3) | 135.1 (132.6, 137.7) | 156.3 (154.5, 158.2) | 159.3 (157.2, 161.4) | 141.4 (138.7, 144.1)     | 108.3 (102.2, 114.3) | 135.9 (132.6, 139.1) | 156.8 (155.0, 158.6) | 159.6 (158.0, 161.2) |
| urban                  | 142.5 (140.3, 144.7)     | 109.4 (104.5, 114.4) | 137.0 (134.4, 139.6) | 157.9 (156.1, 159.8) | 160.7 (158.6, 162.8) | 141.9 (139.2, 144.7)     | 109.1 (103.2, 115.2) | 136.5 (133.2, 139.8) | 157.2 (155.4, 159.0) | 159.7 (158.1, 161.4) |
| urban-rural difference | 1.8 (0.8, 2.8)           | 2.1 (0.6, 3.7)       | 1.8 (0.8, 3.0)       | 1.6 (0.7, 2.5)       | 1.4 (0.4, 2.4)       | 0.5 (-0.5, 1.5)          | 0.8 (-0.8, 2.4)      | 0.6 (-0.5, 1.8)      | 0.3 (-0.5, 1.2)      | 0.2 (-0.6, 0.9)      |
| <b>West Africa</b>     |                          |                      |                      |                      |                      |                          |                      |                      |                      |                      |
| <b>Benin</b>           |                          |                      |                      |                      |                      |                          |                      |                      |                      |                      |
| rural                  | 139.4 (137.5, 141.3)     | 106.9 (102.1, 111.4) | 133.4 (130.9, 135.8) | 155.0 (153.5, 156.5) | 158.1 (156.6, 159.7) | 139.7 (137.4, 141.9)     | 107.9 (102.5, 113.4) | 133.8 (131.0, 136.6) | 155.0 (153.5, 156.4) | 158.0 (156.7, 159.3) |
| urban                  | 141.1 (139.2, 143.0)     | 109.3 (104.6, 113.9) | 135.3 (132.9, 137.7) | 156.4 (155.0, 157.9) | 159.2 (157.6, 160.7) | 141.0 (138.7, 143.2)     | 109.9 (104.3, 115.3) | 135.3 (132.4, 138.1) | 155.9 (154.5, 157.3) | 158.6 (157.2, 159.9) |
| urban-rural difference | 1.8 (0.9, 2.7)           | 2.5 (1.0, 4.0)       | 2.0 (0.9, 3.0)       | 1.4 (0.7, 2.2)       | 1.0 (0.2, 1.8)       | 1.3 (0.4, 2.2)           | 2.0 (0.5, 3.6)       | 1.5 (0.5, 2.5)       | 1.0 (0.2, 1.7)       | 0.6 (-0.2, 1.3)      |
| <b>Burkina Faso</b>    |                          |                      |                      |                      |                      |                          |                      |                      |                      |                      |
| rural                  | 140.8 (139.1, 142.6)     | 106.2 (103.6, 108.8) | 134.4 (132.4, 136.5) | 157.3 (155.5, 159.1) | 161.2 (159.4, 163.1) | 141.1 (138.6, 143.7)     | 107.3 (102.8, 111.8) | 134.9 (131.8, 137.9) | 157.2 (155.1, 159.3) | 160.9 (158.9, 162.9) |
| urban                  | 142.9 (141.0, 144.7)     | 109.0 (106.1, 111.9) | 136.7 (134.5, 138.9) | 159.0 (157.2, 160.8) | 162.5 (160.6, 164.5) | 142.7 (140.2, 145.4)     | 109.7 (105.1, 114.2) | 136.7 (133.6, 139.9) | 158.5 (156.4, 160.6) | 161.8 (159.8, 163.8) |
| urban-rural difference | 2.0 (1.1, 3.0)           | 2.8 (1.3, 4.3)       | 2.3 (1.2, 3.4)       | 1.7 (0.9, 2.6)       | 1.3 (0.4, 2.2)       | 1.6 (0.6, 2.6)           | 2.4 (0.8, 4.0)       | 1.8 (0.7, 3.0)       | 1.3 (0.4, 2.2)       | 0.9 (-0.1, 1.8)      |
| <b>Cabo Verde</b>      |                          |                      |                      |                      |                      |                          |                      |                      |                      |                      |
| rural                  | 142.6 (139.3, 146.0)     | 109.7 (104.2, 115.4) | 136.4 (132.5, 140.5) | 158.6 (155.3, 162.1) | 161.6 (158.0, 165.0) | 145.7 (142.3, 149.2)     | 113.5 (107.1, 119.9) | 139.8 (135.6, 144.1) | 161.3 (158.4, 164.2) | 163.9 (161.9, 165.9) |
| urban                  | 145.0 (141.6, 148.4)     | 112.6 (107.0, 118.2) | 138.9 (134.9, 143.0) | 160.7 (157.4, 164.1) | 163.4 (160.0, 166.9) | 147.6 (144.3, 151.0)     | 116.0 (109.6, 122.3) | 141.8 (137.8, 146.1) | 163.0 (160.2, 165.9) | 165.3 (163.4, 167.2) |
| urban-rural difference | 2.4 (1.0, 3.7)           | 2.9 (1.2, 4.6)       | 2.5 (1.1, 3.9)       | 2.1 (0.8, 3.5)       | 1.8 (0.4, 3.3)       | 1.9 (0.7, 3.1)           | 2.4 (0.7, 4.1)       | 2.1 (0.7, 3.4)       | 1.7 (0.5, 2.9)       | 1.4 (0.1, 2.7)       |
| <b>Cameroon</b>        |                          |                      |                      |                      |                      |                          |                      |                      |                      |                      |



| Girls                        | Mean height in 1990 (cm) |                      |                      |                      |                      | Mean height in 2020 (cm) |                      |                      |                      |                      |
|------------------------------|--------------------------|----------------------|----------------------|----------------------|----------------------|--------------------------|----------------------|----------------------|----------------------|----------------------|
|                              | Age-standardised         | 5 years              | 10 years             | 15 years             | 19 years             | Age-standardised         | 5 years              | 10 years             | 15 years             | 19 years             |
| rural                        | 141.4 (139.4, 143.4)     | 108.6 (104.0, 113.3) | 135.4 (132.9, 137.9) | 157.1 (155.5, 158.7) | 160.2 (158.5, 161.8) | 141.7 (139.4, 144.0)     | 109.7 (104.4, 115.2) | 135.8 (133.0, 138.8) | 157.1 (155.7, 158.5) | 159.9 (158.6, 161.2) |
| urban                        | 143.1 (141.1, 145.0)     | 111.0 (106.3, 115.7) | 137.2 (134.8, 139.8) | 158.5 (156.9, 160.1) | 161.1 (159.4, 162.8) | 142.9 (140.6, 145.2)     | 111.7 (106.2, 117.2) | 137.3 (134.4, 140.1) | 158.0 (156.6, 159.3) | 160.4 (159.0, 161.7) |
| urban-rural difference       | 1.7 (0.8, 2.6)           | 2.4 (1.0, 4.0)       | 1.9 (0.9, 3.0)       | 1.4 (0.6, 2.1)       | 0.9 (0.1, 1.7)       | 1.2 (0.3, 2.1)           | 1.9 (0.4, 3.5)       | 1.4 (0.4, 2.5)       | 0.9 (0.2, 1.6)       | 0.5 (-0.3, 1.1)      |
| <b>Chad</b>                  |                          |                      |                      |                      |                      |                          |                      |                      |                      |                      |
| rural                        | 142.6 (140.1, 144.9)     | 109.4 (104.4, 114.4) | 136.3 (133.3, 139.3) | 158.6 (156.5, 160.5) | 161.9 (159.9, 163.8) | 143.0 (140.4, 145.7)     | 110.5 (104.7, 116.3) | 136.9 (133.6, 140.1) | 158.8 (156.8, 160.7) | 162.0 (160.1, 164.0) |
| urban                        | 144.7 (142.4, 147.1)     | 112.2 (107.2, 117.3) | 138.6 (135.7, 141.6) | 160.4 (158.4, 162.4) | 163.3 (161.4, 165.2) | 144.8 (142.1, 147.4)     | 112.9 (107.1, 118.8) | 138.8 (135.6, 142.0) | 160.2 (158.3, 162.1) | 163.1 (161.2, 165.0) |
| urban-rural difference       | 2.1 (1.0, 3.2)           | 2.8 (1.2, 4.4)       | 2.3 (1.1, 3.5)       | 1.8 (0.8, 2.9)       | 1.5 (0.3, 2.6)       | 1.7 (0.7, 2.8)           | 2.4 (0.8, 4.0)       | 1.9 (0.8, 3.1)       | 1.5 (0.5, 2.4)       | 1.1 (0.1, 2.1)       |
| <b>Côte d'Ivoire</b>         |                          |                      |                      |                      |                      |                          |                      |                      |                      |                      |
| rural                        | 140.5 (138.3, 142.8)     | 107.6 (102.9, 112.3) | 134.6 (131.8, 137.3) | 156.4 (154.5, 158.5) | 159.0 (156.9, 161.1) | 140.6 (137.8, 143.5)     | 109.0 (103.3, 115.0) | 135.0 (131.5, 138.5) | 155.9 (153.8, 158.1) | 158.0 (156.0, 160.0) |
| urban                        | 142.9 (140.6, 145.1)     | 110.6 (105.9, 115.5) | 137.1 (134.4, 139.8) | 158.5 (156.5, 160.6) | 160.7 (158.6, 162.8) | 142.6 (139.7, 145.5)     | 111.6 (105.7, 117.7) | 137.1 (133.6, 140.6) | 157.6 (155.4, 159.7) | 159.3 (157.3, 161.3) |
| urban-rural difference       | 2.3 (1.4, 3.3)           | 3.0 (1.5, 4.5)       | 2.5 (1.4, 3.6)       | 2.0 (1.1, 3.0)       | 1.7 (0.7, 2.7)       | 1.9 (0.9, 3.0)           | 2.6 (1.1, 4.2)       | 2.1 (1.0, 3.3)       | 1.7 (0.8, 2.6)       | 1.3 (0.3, 2.2)       |
| <b>Gambia</b>                |                          |                      |                      |                      |                      |                          |                      |                      |                      |                      |
| rural                        | 143.1 (140.3, 145.8)     | 110.6 (105.7, 115.5) | 137.3 (134.3, 140.3) | 158.8 (155.9, 161.5) | 160.8 (157.0, 164.3) | 144.0 (141.9, 146.2)     | 111.9 (106.5, 117.5) | 138.3 (135.7, 141.0) | 159.6 (158.3, 160.8) | 161.6 (160.4, 162.9) |
| urban                        | 144.6 (141.9, 147.3)     | 112.9 (107.9, 117.8) | 139.1 (136.1, 142.0) | 160.0 (157.2, 162.8) | 161.6 (158.0, 165.2) | 145.1 (143.0, 147.3)     | 113.8 (108.3, 119.3) | 139.6 (136.9, 142.4) | 160.3 (159.0, 161.6) | 162.0 (160.8, 163.2) |
| urban-rural difference       | 1.6 (0.5, 2.7)           | 2.3 (0.7, 3.9)       | 1.8 (0.6, 3.0)       | 1.2 (0.2, 2.3)       | 0.8 (-0.2, 1.9)      | 1.1 (0.2, 2.0)           | 1.8 (0.3, 3.4)       | 1.3 (0.3, 2.4)       | 0.8 (0.0, 1.5)       | 0.4 (-0.4, 1.2)      |
| <b>Ghana</b>                 |                          |                      |                      |                      |                      |                          |                      |                      |                      |                      |
| rural                        | 139.4 (137.9, 141.0)     | 107.6 (104.6, 110.6) | 133.3 (131.4, 135.2) | 154.8 (153.3, 156.4) | 157.9 (156.1, 159.7) | 140.8 (139.6, 141.9)     | 109.3 (107.2, 111.3) | 134.7 (133.3, 136.2) | 156.0 (154.9, 157.2) | 159.3 (158.1, 160.4) |
| urban                        | 141.1 (139.5, 142.6)     | 110.2 (107.2, 113.2) | 135.2 (133.4, 137.2) | 156.1 (154.6, 157.7) | 158.7 (156.9, 160.5) | 142.0 (140.9, 143.2)     | 111.4 (109.3, 113.5) | 136.2 (134.8, 137.7) | 156.9 (155.8, 158.1) | 159.6 (158.5, 160.8) |
| urban-rural difference       | 1.7 (0.8, 2.5)           | 2.5 (1.2, 3.8)       | 1.9 (0.9, 2.9)       | 1.3 (0.5, 2.1)       | 0.8 (0.0, 1.6)       | 1.2 (0.5, 1.9)           | 2.1 (0.9, 3.3)       | 1.5 (0.7, 2.3)       | 0.9 (0.2, 1.5)       | 0.4 (-0.3, 1.0)      |
| <b>Guinea</b>                |                          |                      |                      |                      |                      |                          |                      |                      |                      |                      |
| rural                        | 139.9 (137.8, 142.0)     | 107.7 (102.8, 112.8) | 134.4 (131.1, 137.6) | 155.8 (152.5, 159.0) | 157.8 (154.0, 161.7) | 139.8 (137.5, 142.3)     | 109.5 (103.4, 115.8) | 135.5 (131.9, 139.2) | 156.4 (153.9, 158.9) | 158.2 (155.9, 160.6) |
| urban                        | 142.3 (140.1, 144.4)     | 110.6 (105.6, 115.7) | 136.8 (133.5, 140.1) | 157.8 (154.5, 161.0) | 159.5 (155.7, 163.3) | 141.9 (139.5, 144.3)     | 112.0 (105.7, 118.4) | 137.6 (133.8, 141.3) | 158.0 (155.5, 160.4) | 159.5 (157.2, 161.8) |
| urban-rural difference       | 2.4 (1.4, 3.4)           | 2.9 (1.3, 4.5)       | 2.4 (1.2, 3.7)       | 2.0 (0.9, 3.1)       | 1.7 (0.5, 2.9)       | 2.0 (1.1, 3.0)           | 2.4 (0.9, 4.0)       | 2.0 (0.8, 3.2)       | 1.6 (0.5, 2.6)       | 1.3 (0.2, 2.4)       |
| <b>Guinea Bissau</b>         |                          |                      |                      |                      |                      |                          |                      |                      |                      |                      |
| rural                        | 140.1 (137.1, 143.2)     | 107.8 (103.3, 112.6) | 134.2 (131.5, 136.7) | 155.4 (153.6, 157.3) | 157.8 (155.7, 159.8) | 141.1 (138.0, 144.2)     | 107.5 (102.1, 113.2) | 133.9 (131.0, 136.9) | 155.4 (153.9, 156.9) | 158.2 (156.7, 159.7) |
| urban                        | 142.4 (139.3, 145.4)     | 110.8 (106.1, 115.7) | 136.7 (134.0, 139.4) | 157.5 (155.7, 159.4) | 159.6 (157.5, 161.7) | 143.0 (139.8, 146.2)     | 110.2 (104.7, 115.8) | 136.2 (133.2, 139.1) | 157.1 (155.6, 158.6) | 159.6 (158.1, 161.1) |
| urban-rural difference       | 2.3 (1.1, 3.4)           | 3.0 (1.5, 4.6)       | 2.6 (1.5, 3.7)       | 2.1 (1.2, 3.0)       | 1.7 (0.8, 2.7)       | 1.9 (0.7, 2.9)           | 2.7 (1.1, 4.2)       | 2.2 (1.1, 3.3)       | 1.8 (1.0, 2.5)       | 1.4 (0.6, 2.2)       |
| <b>Liberia</b>               |                          |                      |                      |                      |                      |                          |                      |                      |                      |                      |
| rural                        | 137.3 (134.8, 139.9)     | 104.8 (99.9, 109.6)  | 131.2 (128.4, 134.2) | 153.0 (150.4, 155.6) | 156.1 (153.0, 159.4) | 138.4 (136.0, 140.7)     | 106.6 (101.1, 112.1) | 132.5 (129.5, 135.3) | 153.7 (152.2, 155.2) | 156.6 (155.1, 158.1) |
| urban                        | 139.3 (136.8, 141.9)     | 107.4 (102.5, 112.3) | 133.4 (130.6, 136.4) | 154.7 (152.2, 157.3) | 157.5 (154.4, 160.7) | 140.0 (137.6, 142.3)     | 108.7 (103.2, 114.3) | 134.2 (131.2, 137.1) | 155.0 (153.5, 156.5) | 157.6 (156.1, 159.1) |
| urban-rural difference       | 2.0 (1.0, 3.0)           | 2.6 (1.1, 4.1)       | 2.2 (1.0, 3.3)       | 1.7 (0.8, 2.6)       | 1.4 (0.3, 2.4)       | 1.6 (0.7, 2.5)           | 2.2 (0.7, 3.7)       | 1.8 (0.7, 2.8)       | 1.3 (0.5, 2.1)       | 1.0 (0.2, 1.8)       |
| <b>Mali</b>                  |                          |                      |                      |                      |                      |                          |                      |                      |                      |                      |
| rural                        | 142.4 (140.4, 144.2)     | 109.3 (104.7, 114.0) | 136.2 (133.7, 138.6) | 158.2 (156.8, 159.7) | 161.6 (160.2, 163.0) | 143.1 (140.8, 145.5)     | 110.8 (105.2, 116.5) | 137.1 (134.2, 140.1) | 158.6 (157.1, 160.1) | 161.7 (160.3, 163.1) |
| urban                        | 144.5 (142.5, 146.4)     | 112.1 (107.4, 116.9) | 138.5 (135.9, 140.9) | 160.0 (158.6, 161.5) | 163.0 (161.6, 164.4) | 144.8 (142.5, 147.2)     | 113.2 (107.6, 118.9) | 139.0 (136.1, 142.0) | 160.0 (158.5, 161.5) | 162.7 (161.3, 164.1) |
| urban-rural difference       | 2.1 (1.2, 3.0)           | 2.8 (1.3, 4.3)       | 2.3 (1.3, 3.4)       | 1.8 (1.0, 2.6)       | 1.4 (0.6, 2.2)       | 1.7 (0.8, 2.6)           | 2.4 (0.9, 3.9)       | 1.9 (0.8, 2.9)       | 1.4 (0.7, 2.1)       | 1.0 (0.3, 1.7)       |
| <b>Mauritania</b>            |                          |                      |                      |                      |                      |                          |                      |                      |                      |                      |
| rural                        | 141.7 (139.2, 144.3)     | 108.9 (103.8, 114.0) | 135.7 (132.5, 138.7) | 157.5 (155.2, 159.8) | 160.3 (157.8, 162.8) | 142.7 (140.3, 145.0)     | 110.7 (105.1, 116.1) | 136.9 (133.9, 139.7) | 158.1 (156.5, 159.8) | 160.8 (159.0, 162.6) |
| urban                        | 143.1 (140.5, 145.6)     | 111.2 (106.0, 116.3) | 137.3 (134.2, 140.4) | 158.5 (156.2, 160.8) | 160.8 (158.4, 163.3) | 143.6 (141.2, 146.0)     | 112.4 (107.0, 117.9) | 138.0 (135.1, 141.0) | 158.7 (157.0, 160.3) | 160.8 (159.1, 162.5) |
| urban-rural difference       | 1.4 (0.2, 2.6)           | 2.2 (0.7, 3.9)       | 1.6 (0.3, 2.9)       | 1.0 (-0.2, 2.2)      | 0.5 (-0.8, 1.8)      | 0.9 (-0.1, 2.0)          | 1.8 (0.2, 3.4)       | 1.1 (0.0, 2.3)       | 0.5 (-0.5, 1.5)      | 0.0 (-1.1, 1.1)      |
| <b>Niger</b>                 |                          |                      |                      |                      |                      |                          |                      |                      |                      |                      |
| rural                        | 141.0 (138.8, 143.2)     | 108.0 (103.3, 112.8) | 134.8 (132.1, 137.7) | 156.8 (154.8, 158.8) | 160.2 (158.2, 162.2) | 141.2 (138.5, 144.1)     | 109.4 (103.5, 115.4) | 135.3 (131.9, 138.7) | 156.6 (154.5, 158.6) | 159.7 (157.7, 161.6) |
| urban                        | 143.4 (141.1, 145.6)     | 110.9 (106.0, 115.9) | 137.4 (134.6, 140.2) | 158.9 (156.9, 160.9) | 162.0 (160.0, 164.0) | 143.2 (140.4, 146.0)     | 111.9 (106.1, 118.0) | 137.4 (134.0, 140.9) | 158.3 (156.2, 160.3) | 161.0 (159.0, 163.0) |
| urban-rural difference       | 2.4 (1.3, 3.4)           | 3.0 (1.4, 4.5)       | 2.5 (1.4, 3.7)       | 2.1 (1.2, 3.0)       | 1.8 (0.8, 2.7)       | 2.0 (0.9, 3.0)           | 2.6 (1.0, 4.2)       | 2.1 (1.0, 3.3)       | 1.7 (0.8, 2.6)       | 1.3 (0.4, 2.3)       |
| <b>Nigeria</b>               |                          |                      |                      |                      |                      |                          |                      |                      |                      |                      |
| rural                        | 137.7 (136.2, 139.2)     | 104.5 (102.0, 106.9) | 130.9 (129.1, 132.8) | 153.9 (152.2, 155.6) | 158.2 (156.2, 160.3) | 139.5 (137.7, 141.3)     | 107.8 (104.7, 110.9) | 133.1 (130.9, 135.3) | 155.0 (153.4, 156.6) | 158.7 (157.2, 160.1) |
| urban                        | 140.1 (138.5, 141.8)     | 107.7 (105.1, 110.2) | 133.6 (131.7, 135.5) | 156.0 (154.3, 157.7) | 159.8 (157.8, 161.9) | 141.5 (139.6, 143.5)     | 110.6 (107.1, 114.0) | 135.4 (133.0, 137.8) | 156.7 (155.1, 158.3) | 159.9 (158.5, 161.4) |
| urban-rural difference       | 2.4 (1.5, 3.3)           | 3.2 (1.8, 4.7)       | 2.6 (1.6, 3.7)       | 2.1 (1.3, 2.9)       | 1.6 (0.8, 2.4)       | 2.0 (1.1, 2.9)           | 2.8 (1.4, 4.3)       | 2.2 (1.2, 3.3)       | 1.7 (0.9, 2.4)       | 1.2 (0.4, 2.0)       |
| <b>Sao Tome and Principe</b> |                          |                      |                      |                      |                      |                          |                      |                      |                      |                      |
| rural                        | 141.2 (138.2, 144.2)     | 108.2 (103.0, 113.3) | 135.1 (131.7, 138.5) | 157.2 (154.1, 160.3) | 160.0 (156.7, 163.6) | 143.7 (140.7, 146.8)     | 111.8 (105.8, 118.1) | 137.9 (134.2, 141.7) | 159.1 (156.8, 161.4) | 161.4 (159.6, 163.2) |
| urban                        | 142.6 (139.6, 145.5)     | 110.5 (105.4, 115.7) | 136.7 (133.4, 140.1) | 158.1 (155.2, 161.2) | 160.5 (157.1, 163.9) | 144.6 (141.5, 147.7)     | 113.6 (107.5, 119.9) | 139.1 (135.3, 142.9) | 159.6 (157.4, 161.9) | 161.4 (159.6, 163.2) |
| urban-rural difference       | 1.4 (0.2, 2.6)           | 2.3 (0.7, 4.0)       | 1.6 (0.4, 2.9)       | 1.0 (-0.2, 2.1)      | 0.5 (-0.8, 1.7)      | 0.9 (-0.2, 2.1)          | 1.9 (0.1, 3.5)       | 1.2 (-0.1, 2.4)      | 0.5 (-0.6, 1.6)      | 0.0 (-1.2, 1.2)      |

| Girls                  | Mean height in 1990 (cm) |                      |                      |                      |                      | Mean height in 2020 (cm) |                      |                      |                      |                      |
|------------------------|--------------------------|----------------------|----------------------|----------------------|----------------------|--------------------------|----------------------|----------------------|----------------------|----------------------|
|                        | Age-standardised         | 5 years              | 10 years             | 15 years             | 19 years             | Age-standardised         | 5 years              | 10 years             | 15 years             | 19 years             |
| Senegal                |                          |                      |                      |                      |                      |                          |                      |                      |                      |                      |
| rural                  | 143.2 (140.7, 145.7)     | 110.4 (105.4, 115.2) | 137.0 (134.2, 139.9) | 159.1 (156.6, 161.6) | 162.2 (159.2, 165.0) | 144.3 (141.4, 147.0)     | 111.5 (105.4, 117.5) | 138.0 (134.6, 141.4) | 160.1 (158.0, 162.2) | 163.4 (161.6, 165.1) |
| urban                  | 145.4 (142.9, 147.9)     | 113.1 (108.1, 117.9) | 139.4 (136.6, 142.3) | 161.0 (158.6, 163.6) | 163.8 (160.9, 166.8) | 146.0 (143.2, 148.9)     | 113.8 (107.7, 119.7) | 140.0 (136.5, 143.5) | 161.6 (159.6, 163.7) | 164.6 (162.9, 166.4) |
| urban-rural difference | 2.2 (1.2, 3.2)           | 2.7 (1.2, 4.3)       | 2.3 (1.2, 3.4)       | 2.0 (1.1, 2.9)       | 1.7 (0.7, 2.7)       | 1.8 (0.8, 2.8)           | 2.3 (0.7, 3.9)       | 1.9 (0.8, 3.1)       | 1.5 (0.7, 2.4)       | 1.3 (0.4, 2.1)       |
| Sierra Leone           |                          |                      |                      |                      |                      |                          |                      |                      |                      |                      |
| rural                  | 138.3 (135.7, 140.8)     | 105.6 (100.8, 110.4) | 132.2 (129.4, 135.0) | 153.9 (151.3, 156.5) | 157.2 (153.9, 160.6) | 139.1 (136.8, 141.3)     | 107.8 (102.2, 113.3) | 133.3 (130.5, 136.2) | 154.1 (152.7, 155.6) | 156.9 (155.5, 158.4) |
| urban                  | 140.6 (138.1, 143.2)     | 108.5 (103.6, 113.4) | 134.7 (131.8, 137.6) | 156.1 (153.5, 158.7) | 159.1 (155.8, 162.5) | 141.0 (138.7, 143.3)     | 110.2 (104.7, 115.6) | 135.4 (132.5, 138.2) | 155.8 (154.4, 157.3) | 158.3 (156.9, 159.8) |
| urban-rural difference | 2.4 (1.3, 3.4)           | 2.9 (1.3, 4.4)       | 2.5 (1.4, 3.7)       | 2.2 (1.2, 3.2)       | 1.9 (0.8, 3.0)       | 1.9 (1.0, 2.8)           | 2.4 (0.9, 3.9)       | 2.0 (1.0, 3.1)       | 1.7 (0.9, 2.5)       | 1.4 (0.6, 2.3)       |
| Togo                   |                          |                      |                      |                      |                      |                          |                      |                      |                      |                      |
| rural                  | 140.8 (138.5, 143.2)     | 108.4 (103.6, 113.5) | 135.1 (132.1, 138.0) | 156.5 (154.4, 158.5) | 158.5 (156.4, 160.7) | 141.7 (139.0, 144.4)     | 109.7 (103.9, 115.6) | 136.0 (132.7, 139.3) | 157.2 (155.3, 159.1) | 159.3 (157.5, 161.2) |
| urban                  | 142.2 (139.8, 144.6)     | 110.6 (105.7, 115.6) | 136.6 (133.7, 139.6) | 157.5 (155.4, 159.6) | 159.2 (157.1, 161.3) | 142.6 (139.9, 145.3)     | 111.3 (105.6, 117.3) | 137.1 (133.8, 140.5) | 157.8 (155.8, 159.7) | 159.5 (157.7, 161.3) |
| urban-rural difference | 1.4 (0.3, 2.5)           | 2.1 (0.5, 3.8)       | 1.6 (0.4, 2.8)       | 1.0 (0.0, 2.1)       | 0.6 (-0.5, 1.8)      | 0.9 (-0.2, 2.0)          | 1.6 (0.0, 3.3)       | 1.1 (-0.1, 2.3)      | 0.6 (-0.5, 1.5)      | 0.2 (-0.9, 1.2)      |

| Boys                              | Mean height in 1990 (cm) |                      |                      |                      |                      | Mean height in 2020 (cm) |                      |                      |                      |                      |
|-----------------------------------|--------------------------|----------------------|----------------------|----------------------|----------------------|--------------------------|----------------------|----------------------|----------------------|----------------------|
|                                   | Age-standardised         | 5 years              | 10 years             | 15 years             | 19 years             | Age-standardised         | 5 years              | 10 years             | 15 years             | 19 years             |
| <b>Central and eastern Europe</b> |                          |                      |                      |                      |                      |                          |                      |                      |                      |                      |
| <i>Central Europe</i>             |                          |                      |                      |                      |                      |                          |                      |                      |                      |                      |
| Albania                           |                          |                      |                      |                      |                      |                          |                      |                      |                      |                      |
| rural                             | 148.8 (146.0, 151.6)     | 113.3 (109.8, 116.8) | 139.0 (136.4, 141.7) | 168.9 (165.3, 172.6) | 174.1 (169.0, 179.1) | 150.2 (148.6, 152.0)     | 117.2 (114.2, 120.2) | 141.1 (139.0, 143.2) | 169.3 (167.7, 170.8) | 173.2 (171.5, 175.1) |
| urban                             | 151.0 (148.2, 153.7)     | 115.7 (112.2, 119.1) | 141.2 (138.6, 143.9) | 171.0 (167.4, 174.6) | 176.0 (170.9, 181.0) | 151.9 (150.3, 153.6)     | 119.1 (116.2, 122.1) | 142.8 (140.7, 145.0) | 170.9 (169.3, 172.5) | 174.7 (172.9, 176.5) |
| urban-rural difference            | 2.1 (0.7, 3.4)           | 2.3 (0.8, 3.8)       | 2.2 (0.7, 3.5)       | 2.0 (0.5, 3.4)       | 1.9 (0.2, 3.5)       | 1.7 (0.9, 2.6)           | 1.9 (0.7, 3.2)       | 1.8 (0.9, 2.7)       | 1.6 (0.8, 2.5)       | 1.5 (0.5, 2.5)       |
| Bosnia and Herzegovina            |                          |                      |                      |                      |                      |                          |                      |                      |                      |                      |
| rural                             | 153.6 (149.4, 157.7)     | 117.8 (109.0, 127.1) | 143.5 (139.1, 147.9) | 173.6 (169.7, 177.6) | 180.0 (175.6, 184.6) | 155.6 (151.1, 160.2)     | 120.2 (110.1, 130.5) | 145.6 (140.4, 150.8) | 175.5 (171.7, 179.3) | 181.6 (178.1, 185.2) |
| urban                             | 155.3 (151.2, 159.4)     | 119.4 (110.6, 128.6) | 145.2 (140.7, 149.6) | 175.5 (171.6, 179.4) | 182.0 (177.5, 186.6) | 156.5 (151.9, 161.3)     | 120.9 (110.9, 131.1) | 146.5 (141.2, 151.7) | 176.5 (172.6, 180.5) | 182.8 (179.2, 186.5) |
| urban-rural difference            | 1.8 (0.1, 3.4)           | 1.5 (-0.4, 3.6)      | 1.7 (0.0, 3.4)       | 1.9 (0.2, 3.6)       | 2.0 (0.2, 3.8)       | 0.9 (-0.8, 2.6)          | 0.7 (-1.5, 2.9)      | 0.8 (-0.9, 2.7)      | 1.0 (-0.6, 2.6)      | 1.1 (-0.5, 2.8)      |
| Bulgaria                          |                          |                      |                      |                      |                      |                          |                      |                      |                      |                      |
| rural                             | 150.1 (147.5, 152.5)     | 116.3 (113.6, 119.0) | 139.7 (137.4, 142.0) | 169.7 (166.4, 172.8) | 176.1 (171.4, 180.5) | 151.2 (149.7, 152.8)     | 119.5 (116.9, 122.1) | 141.2 (139.4, 143.0) | 170.0 (167.8, 172.1) | 175.8 (173.2, 178.4) |
| urban                             | 152.5 (150.2, 154.7)     | 118.5 (116.1, 120.9) | 142.1 (140.0, 144.1) | 172.2 (169.3, 175.1) | 178.7 (174.2, 183.2) | 153.0 (151.5, 154.4)     | 121.0 (118.6, 123.5) | 142.9 (141.2, 144.7) | 171.8 (169.8, 173.8) | 177.7 (175.2, 180.3) |
| urban-rural difference            | 2.4 (0.9, 3.9)           | 2.2 (0.7, 3.8)       | 2.4 (0.9, 3.9)       | 2.5 (0.8, 4.2)       | 2.7 (0.7, 4.5)       | 1.7 (0.6, 2.9)           | 1.5 (0.2, 2.9)       | 1.7 (0.5, 2.8)       | 1.8 (0.6, 3.0)       | 1.9 (0.5, 3.4)       |
| Croatia                           |                          |                      |                      |                      |                      |                          |                      |                      |                      |                      |
| rural                             | 153.5 (151.4, 155.5)     | 117.6 (114.9, 120.5) | 144.2 (142.0, 146.2) | 173.7 (171.1, 176.3) | 177.3 (173.7, 181.1) | 155.3 (154.0, 156.6)     | 118.5 (116.0, 120.9) | 145.7 (144.1, 147.2) | 176.0 (174.3, 177.8) | 180.2 (178.1, 182.3) |
| urban                             | 154.9 (152.9, 157.0)     | 118.8 (116.0, 121.6) | 145.5 (143.4, 147.7) | 175.3 (172.7, 177.9) | 179.1 (175.4, 182.9) | 155.9 (154.6, 157.2)     | 118.8 (116.3, 121.2) | 146.2 (144.7, 147.7) | 176.8 (175.1, 178.5) | 181.1 (179.1, 183.1) |
| urban-rural difference            | 1.5 (0.4, 2.5)           | 1.2 (-0.1, 2.4)      | 1.4 (0.3, 2.5)       | 1.6 (0.4, 2.7)       | 1.8 (0.4, 3.1)       | 0.6 (-0.3, 1.5)          | 0.3 (-0.8, 1.4)      | 0.5 (-0.4, 1.4)      | 0.7 (-0.2, 1.7)      | 0.9 (-0.2, 2.0)      |
| Czechia                           |                          |                      |                      |                      |                      |                          |                      |                      |                      |                      |
| rural                             | 151.7 (150.4, 153.1)     | 115.4 (113.6, 117.1) | 141.4 (139.8, 143.1) | 172.2 (170.6, 173.8) | 178.7 (176.9, 180.4) | 154.0 (152.7, 155.3)     | 118.8 (116.7, 121.0) | 144.0 (142.5, 145.5) | 174.1 (172.3, 175.9) | 180.0 (178.1, 181.9) |
| urban                             | 153.0 (151.8, 154.1)     | 116.1 (114.4, 117.6) | 142.5 (141.1, 143.9) | 173.7 (172.3, 175.1) | 180.5 (178.9, 182.0) | 154.3 (153.1, 155.5)     | 118.5 (116.3, 120.7) | 144.1 (142.6, 145.5) | 174.6 (172.9, 176.2) | 180.8 (179.0, 182.6) |
| urban-rural difference            | 1.3 (0.1, 2.4)           | 0.7 (-0.6, 2.0)      | 1.1 (-0.1, 2.3)      | 1.5 (0.3, 2.8)       | 1.8 (0.4, 3.3)       | 0.2 (-0.7, 1.2)          | -0.3 (-1.4, 0.8)     | 0.1 (-0.8, 1.0)      | 0.5 (-0.5, 1.5)      | 0.8 (-0.4, 2.1)      |
| Hungary                           |                          |                      |                      |                      |                      |                          |                      |                      |                      |                      |
| rural                             | 151.2 (148.0, 154.4)     | 113.8 (110.4, 117.2) | 142.5 (139.4, 145.5) | 171.5 (167.3, 175.4) | 175.3 (169.8, 180.6) | 154.0 (153.0, 154.9)     | 119.2 (117.0, 121.4) | 146.1 (144.9, 147.2) | 173.0 (172.0, 174.0) | 175.3 (174.0, 176.7) |
| urban                             | 153.9 (150.6, 157.0)     | 115.9 (112.6, 119.2) | 145.0 (142.0, 147.9) | 174.3 (170.3, 178.2) | 178.5 (173.0, 183.9) | 155.6 (154.7, 156.6)     | 120.3 (118.1, 122.6) | 147.6 (146.5, 148.7) | 174.9 (174.0, 175.8) | 177.5 (176.3, 178.7) |
| urban-rural difference            | 2.6 (1.2, 4.1)           | 2.1 (0.6, 3.6)       | 2.5 (1.1, 3.9)       | 2.9 (1.3, 4.5)       | 3.2 (1.4, 5.0)       | 1.7 (1.1, 2.3)           | 1.1 (0.2, 2.1)       | 1.5 (0.9, 2.2)       | 1.9 (1.2, 2.6)       | 2.2 (1.2, 3.2)       |
| North Macedonia                   |                          |                      |                      |                      |                      |                          |                      |                      |                      |                      |
| rural                             | 148.6 (144.9, 152.4)     | 115.9 (112.1, 119.9) | 138.3 (134.8, 141.9) | 167.8 (163.1, 172.7) | 173.9 (167.1, 180.7) | 150.4 (148.2, 152.5)     | 118.7 (115.4, 122.2) | 140.3 (138.1, 142.5) | 169.1 (165.8, 172.4) | 174.9 (169.9, 179.7) |
| urban                             | 150.7 (147.1, 154.5)     | 117.9 (114.0, 121.9) | 140.4 (136.9, 144.1) | 170.0 (165.2, 175.0) | 176.2 (169.4, 183.1) | 151.7 (149.6, 153.9)     | 119.9 (116.5, 123.3) | 141.6 (139.4, 143.8) | 170.6 (167.2, 173.9) | 176.4 (171.4, 181.4) |
| urban-rural difference            | 2.1 (0.6, 3.7)           | 1.9 (0.5, 3.4)       | 2.1 (0.6, 3.6)       | 2.2 (0.5, 3.9)       | 2.3 (0.4, 4.4)       | 1.3 (0.3, 2.4)           | 1.1 (0.0, 2.4)       | 1.3 (0.3, 2.4)       | 1.4 (0.2, 2.7)       | 1.5 (0.1, 3.1)       |
| Montenegro                        |                          |                      |                      |                      |                      |                          |                      |                      |                      |                      |
| rural                             | 153.4 (150.1, 156.7)     | 118.8 (114.3, 123.3) | 143.2 (139.9, 146.5) | 173.4 (169.2, 177.4) | 179.0 (173.1, 184.8) | 155.6 (154.5, 156.7)     | 119.8 (117.9, 121.6) | 145.0 (143.6, 146.4) | 176.3 (174.7, 177.8) | 182.6 (180.6, 184.7) |
| urban                             | 155.4 (152.2, 158.8)     | 120.7 (116.2, 125.1) | 145.2 (142.0, 148.5) | 175.5 (171.4, 179.5) | 181.3 (175.5, 186.9) | 156.8 (155.8, 157.9)     | 120.8 (119.0, 122.6) | 146.2 (144.8, 147.5) | 177.6 (176.1, 179.0) | 184.0 (182.0, 186.0) |
| urban-rural difference            | 2.0 (0.5, 3.6)           | 1.9 (0.3, 3.4)       | 2.0 (0.5, 3.5)       | 2.1 (0.4, 3.8)       | 2.2 (0.2, 4.2)       | 1.2 (0.4, 2.1)           | 1.1 (0.1, 2.1)       | 1.2 (0.3, 2.0)       | 1.3 (0.3, 2.3)       | 1.4 (0.1, 2.7)       |
| Poland                            |                          |                      |                      |                      |                      |                          |                      |                      |                      |                      |
| rural                             | 150.2 (148.9, 151.5)     | 112.8 (111.1, 114.6) | 140.6 (139.2, 141.9) | 170.6 (169.1, 172.0) | 176.7 (175.3, 178.2) | 152.3 (151.3, 153.3)     | 113.9 (112.2, 115.6) | 142.6 (141.5, 143.8) | 173.0 (171.9, 174.0) | 179.0 (177.8, 180.2) |
| urban                             | 151.2 (150.0, 152.5)     | 113.6 (111.9, 115.3) | 141.5 (140.2, 142.8) | 171.7 (170.3, 173.1) | 178.0 (176.6, 179.4) | 152.6 (151.7, 153.5)     | 114.1 (112.4, 115.7) | 142.9 (141.8, 144.0) | 173.4 (172.4, 174.5) | 179.6 (178.4, 180.8) |
| urban-rural difference            | 1.0 (0.1, 1.9)           | 0.8 (-0.3, 1.8)      | 0.9 (0.0, 1.8)       | 1.1 (0.2, 2.0)       | 1.2 (0.3, 2.2)       | 0.3 (-0.4, 1.1)          | 0.1 (-0.8, 1.1)      | 0.3 (-0.5, 1.0)      | 0.4 (-0.3, 1.2)      | 0.6 (-0.2, 1.4)      |
| Romania                           |                          |                      |                      |                      |                      |                          |                      |                      |                      |                      |
| rural                             | 146.5 (144.3, 148.8)     | 109.5 (107.4, 111.7) | 137.1 (135.0, 139.3) | 166.5 (163.8, 169.3) | 172.6 (168.5, 176.6) | 150.3 (149.2, 151.4)     | 113.7 (111.7, 115.5) | 141.2 (139.9, 142.4) | 170.1 (168.8, 171.4) | 175.5 (173.7, 177.2) |
| urban                             | 150.7 (148.5, 153.0)     | 112.7 (110.5, 114.9) | 141.0 (138.8, 143.2) | 171.2 (168.4, 174.0) | 177.9 (173.9, 181.9) | 152.7 (151.6, 153.7)     | 115.0 (113.2, 116.8) | 143.3 (142.1, 144.4) | 172.9 (171.6, 174.3) | 178.9 (177.2, 180.7) |
| urban-rural difference            | 4.2 (3.1, 5.5)           | 3.2 (1.9, 4.5)       | 3.9 (2.7, 5.2)       | 4.7 (3.4, 6.0)       | 5.3 (3.9, 6.8)       | 2.4 (1.5, 3.2)           | 1.3 (0.3, 2.3)       | 2.1 (1.2, 2.9)       | 2.8 (1.9, 3.8)       | 3.4 (2.4, 4.6)       |
| Serbia                            |                          |                      |                      |                      |                      |                          |                      |                      |                      |                      |
| rural                             | 152.9 (150.9, 154.8)     | 118.1 (115.3, 121.0) | 143.0 (141.0, 145.1) | 172.5 (170.3, 174.8) | 178.2 (175.6, 180.9) | 154.0 (152.6, 155.3)     | 118.6 (115.9, 121.3) | 143.9 (142.3, 145.4) | 174.0 (172.4, 175.6) | 180.3 (178.3, 182.2) |
| urban                             | 154.5 (152.6, 156.5)     | 119.5 (116.7, 122.5) | 144.7 (142.7, 146.7) | 174.3 (172.1, 176.6) | 180.2 (177.4, 182.8) | 154.9 (153.7, 156.3)     | 119.3 (116.7, 122.0) | 144.8 (143.2, 146.3) | 175.0 (173.6, 176.6) | 181.4 (179.6, 183.3) |
| urban-rural difference            | 1.7 (0.6, 2.7)           | 1.5 (0.2, 2.7)       | 1.6 (0.5, 2.7)       | 1.8 (0.7, 2.9)       | 1.9 (0.7, 3.1)       | 0.9 (0.1, 1.8)           | 0.7 (-0.4, 1.8)      | 0.9 (0.0, 1.8)       | 1.1 (0.2, 1.9)       | 1.2 (0.2, 2.2)       |
| Slovakia                          |                          |                      |                      |                      |                      |                          |                      |                      |                      |                      |
| rural                             | 151.4 (149.8, 152.9)     | 114.5 (112.3, 116.6) | 141.1 (139.4, 142.8) | 172.2 (170.3, 174.0) | 177.9 (175.4, 180.4) | 154.3 (152.9, 155.7)     | 117.7 (114.7, 120.7) | 144.2 (142.6, 145.8) | 175.0 (173.3, 176.8) | 180.4 (178.4, 182.5) |
| urban                             | 152.9 (151.4, 154.3)     | 115.9 (113.8, 117.9) | 142.5 (140.9, 144.1) | 173.8 (171.9, 175.5) | 179.7 (177.2, 182.1) | 155.2 (153.7, 156.6)     | 118.4 (115.4, 121.4) | 145.0 (143.4, 146.5) | 176.0 (174.2, 177.7) | 181.5 (179.5, 183.6) |
| urban-rural difference            | 1.5 (0.3, 2.6)           | 1.3 (0.1, 2.5)       | 1.5 (0.3, 2.5)       | 1.6 (0.3, 2.8)       | 1.7 (0.2, 3.2)       | 0.9 (-0.2, 2.0)          | 0.7 (-0.6, 2.0)      | 0.8 (-0.2, 1.9)      | 1.0 (-0.2, 2.1)      | 1.1 (-0.2, 2.4)      |
| Slovenia                          |                          |                      |                      |                      |                      |                          |                      |                      |                      |                      |

| Boys                                              | Mean height in 1990 (cm) |                      |                      |                      |                      | Mean height in 2020 (cm) |                      |                      |                      |                      |
|---------------------------------------------------|--------------------------|----------------------|----------------------|----------------------|----------------------|--------------------------|----------------------|----------------------|----------------------|----------------------|
|                                                   | Age-standardised         | 5 years              | 10 years             | 15 years             | 19 years             | Age-standardised         | 5 years              | 10 years             | 15 years             | 19 years             |
| rural                                             | 152.3 (151.7, 152.9)     | 117.0 (116.0, 117.9) | 142.5 (141.8, 143.1) | 172.6 (171.9, 173.3) | 177.1 (176.1, 178.1) | 155.0 (154.1, 155.8)     | 118.5 (116.8, 120.3) | 144.9 (143.9, 145.8) | 175.8 (174.9, 176.6) | 180.7 (179.8, 181.7) |
| urban                                             | 153.3 (152.7, 153.9)     | 117.8 (116.9, 118.7) | 143.4 (142.8, 144.0) | 173.7 (173.0, 174.4) | 178.3 (177.4, 179.2) | 155.3 (154.4, 156.1)     | 118.6 (116.8, 120.3) | 145.1 (144.2, 146.0) | 176.2 (175.4, 177.0) | 181.2 (180.3, 182.1) |
| urban-rural difference                            | 1.0 (0.2, 1.9)           | 0.8 (-0.2, 1.8)      | 1.0 (0.1, 1.8)       | 1.1 (0.1, 2.1)       | 1.2 (-0.1, 2.5)      | 0.3 (-0.6, 1.2)          | 0.1 (-1.2, 1.3)      | 0.2 (-0.7, 1.2)      | 0.4 (-0.6, 1.3)      | 0.5 (-0.7, 1.6)      |
| <b>Eastern Europe</b>                             |                          |                      |                      |                      |                      |                          |                      |                      |                      |                      |
| <b>Belarus</b>                                    |                          |                      |                      |                      |                      |                          |                      |                      |                      |                      |
| rural                                             | 147.7 (142.6, 153.0)     | 110.6 (101.2, 119.8) | 137.2 (131.9, 142.6) | 167.7 (162.2, 173.4) | 175.9 (169.4, 182.6) | 151.8 (147.0, 156.6)     | 115.8 (105.0, 126.3) | 141.7 (136.1, 147.2) | 171.3 (167.5, 175.1) | 178.6 (175.8, 181.4) |
| urban                                             | 149.8 (144.7, 155.0)     | 112.4 (102.9, 121.6) | 139.2 (133.8, 144.5) | 169.9 (164.5, 175.5) | 178.3 (171.6, 184.9) | 153.0 (148.2, 157.8)     | 116.8 (105.8, 127.5) | 142.8 (137.3, 148.3) | 172.6 (168.8, 176.4) | 180.1 (177.2, 182.8) |
| urban-rural difference                            | 2.1 (0.3, 3.9)           | 1.8 (-0.2, 3.9)      | 2.0 (0.1, 3.9)       | 2.2 (0.3, 4.1)       | 2.4 (0.3, 4.4)       | 1.2 (-0.5, 3.0)          | 1.0 (-1.3, 3.2)      | 1.1 (-0.7, 3.0)      | 1.3 (-0.3, 3.0)      | 1.5 (-0.2, 3.1)      |
| <b>Estonia</b>                                    |                          |                      |                      |                      |                      |                          |                      |                      |                      |                      |
| rural                                             | 151.4 (149.2, 153.5)     | 111.5 (107.9, 114.9) | 141.0 (138.2, 143.5) | 172.2 (169.9, 174.6) | 180.5 (178.2, 182.8) | 155.9 (154.4, 157.3)     | 117.3 (114.7, 119.7) | 146.0 (144.4, 147.7) | 176.1 (174.4, 177.8) | 183.1 (181.0, 185.2) |
| urban                                             | 152.5 (150.4, 154.5)     | 112.2 (108.7, 115.5) | 141.9 (139.4, 144.5) | 173.5 (171.3, 175.9) | 182.0 (179.7, 184.3) | 155.9 (154.5, 157.3)     | 116.9 (114.3, 119.5) | 145.9 (144.3, 147.6) | 176.3 (174.7, 177.9) | 183.5 (181.5, 185.6) |
| urban-rural difference                            | 1.1 (-0.1, 2.3)          | 0.7 (-0.9, 2.2)      | 1.0 (-0.3, 2.3)      | 1.3 (0.1, 2.5)       | 1.5 (0.3, 2.8)       | 0.0 (-0.8, 0.9)          | -0.4 (-1.6, 0.8)     | -0.1 (-1.0, 0.8)     | 0.2 (-0.6, 1.1)      | 0.4 (-0.5, 1.4)      |
| <b>Latvia</b>                                     |                          |                      |                      |                      |                      |                          |                      |                      |                      |                      |
| rural                                             | 149.9 (147.1, 152.8)     | 112.9 (109.2, 116.5) | 138.9 (135.9, 142.0) | 169.8 (166.2, 173.6) | 179.2 (174.7, 183.7) | 153.8 (152.1, 155.5)     | 118.3 (115.7, 121.0) | 143.4 (141.5, 145.2) | 173.2 (170.7, 175.6) | 181.4 (178.0, 184.9) |
| urban                                             | 151.8 (149.1, 154.7)     | 114.6 (111.0, 118.2) | 140.8 (137.8, 143.8) | 172.0 (168.4, 175.7) | 181.4 (176.9, 185.9) | 154.8 (153.2, 156.5)     | 119.0 (116.3, 121.6) | 144.3 (142.4, 146.1) | 174.3 (171.9, 176.7) | 182.6 (179.3, 186.1) |
| urban-rural difference                            | 2.0 (0.5, 3.5)           | 1.7 (0.2, 3.2)       | 1.9 (0.5, 3.4)       | 2.1 (0.5, 3.8)       | 2.3 (0.5, 4.2)       | 1.0 (0.0, 1.9)           | 0.7 (-0.5, 1.8)      | 0.9 (-0.1, 1.8)      | 1.1 (0.0, 2.2)       | 1.3 (-0.1, 2.7)      |
| <b>Lithuania</b>                                  |                          |                      |                      |                      |                      |                          |                      |                      |                      |                      |
| rural                                             | 150.0 (147.5, 152.5)     | 115.7 (111.7, 119.7) | 139.3 (136.3, 142.2) | 169.2 (166.2, 172.2) | 177.6 (174.8, 180.6) | 154.0 (152.4, 155.5)     | 119.8 (116.8, 123.0) | 143.3 (141.5, 145.1) | 173.0 (170.8, 175.2) | 181.3 (178.1, 184.6) |
| urban                                             | 152.2 (149.6, 154.7)     | 117.4 (113.4, 121.4) | 141.3 (138.3, 144.3) | 171.5 (168.5, 174.6) | 180.1 (177.0, 183.4) | 155.0 (153.5, 156.6)     | 120.5 (117.4, 123.7) | 144.3 (142.5, 146.1) | 174.3 (172.0, 176.5) | 182.7 (179.6, 186.1) |
| urban-rural difference                            | 2.1 (0.7, 3.6)           | 1.7 (0.3, 3.2)       | 2.0 (0.6, 3.4)       | 2.3 (0.7, 3.8)       | 2.5 (0.7, 4.3)       | 1.1 (0.1, 2.0)           | 0.7 (-0.4, 1.8)      | 1.0 (0.0, 1.9)       | 1.2 (0.2, 2.3)       | 1.5 (0.1, 2.8)       |
| <b>Moldova</b>                                    |                          |                      |                      |                      |                      |                          |                      |                      |                      |                      |
| rural                                             | 146.2 (142.6, 149.8)     | 110.6 (105.4, 116.0) | 135.4 (131.7, 139.0) | 165.7 (160.9, 170.6) | 174.3 (167.8, 180.6) | 149.9 (147.2, 152.6)     | 116.5 (110.9, 122.2) | 139.8 (136.5, 143.1) | 168.6 (165.5, 171.5) | 175.8 (173.1, 178.6) |
| urban                                             | 148.5 (144.9, 152.1)     | 112.7 (107.4, 118.1) | 137.7 (134.1, 141.2) | 168.2 (163.3, 173.0) | 176.9 (170.4, 183.1) | 151.4 (148.7, 154.0)     | 117.7 (112.1, 123.3) | 141.2 (137.8, 144.5) | 170.1 (167.0, 173.0) | 177.5 (174.7, 180.3) |
| urban-rural difference                            | 2.3 (0.7, 4.0)           | 2.1 (0.4, 3.9)       | 2.3 (0.7, 3.9)       | 2.4 (0.8, 4.2)       | 2.6 (0.7, 4.6)       | 1.4 (0.1, 2.8)           | 1.2 (-0.6, 2.9)      | 1.4 (-0.1, 2.8)      | 1.5 (0.2, 2.9)       | 1.7 (0.2, 3.2)       |
| <b>Russian Federation</b>                         |                          |                      |                      |                      |                      |                          |                      |                      |                      |                      |
| rural                                             | 144.7 (143.8, 145.6)     | 106.9 (105.7, 108.1) | 134.4 (133.4, 135.3) | 164.4 (163.4, 165.4) | 173.9 (172.6, 175.1) | 149.5 (147.7, 151.3)     | 112.4 (110.0, 114.9) | 139.5 (137.5, 141.5) | 168.9 (167.1, 170.8) | 177.6 (175.8, 179.4) |
| urban                                             | 148.1 (147.2, 148.9)     | 110.2 (109.0, 111.3) | 137.7 (136.7, 138.6) | 167.8 (166.7, 168.8) | 177.3 (176.0, 178.5) | 152.4 (150.8, 153.9)     | 115.2 (113.1, 117.5) | 142.3 (140.6, 144.1) | 171.8 (170.2, 173.4) | 180.6 (178.9, 182.2) |
| urban-rural difference                            | 3.3 (2.8, 3.9)           | 3.3 (2.5, 4.0)       | 3.3 (2.7, 3.9)       | 3.4 (2.8, 4.0)       | 3.4 (2.7, 4.1)       | 2.9 (1.8, 4.0)           | 2.8 (1.6, 4.1)       | 2.8 (1.7, 4.0)       | 2.9 (1.8, 4.0)       | 2.9 (1.8, 4.1)       |
| <b>Ukraine</b>                                    |                          |                      |                      |                      |                      |                          |                      |                      |                      |                      |
| rural                                             | 147.5 (144.1, 150.8)     | 109.7 (106.1, 113.6) | 136.3 (133.1, 139.6) | 167.8 (163.6, 171.9) | 177.6 (171.9, 183.2) | 152.4 (151.0, 153.7)     | 115.4 (113.0, 117.9) | 141.7 (140.2, 143.1) | 172.3 (170.9, 173.6) | 181.1 (179.2, 183.0) |
| urban                                             | 148.7 (145.4, 152.1)     | 110.8 (107.0, 114.5) | 137.5 (134.2, 140.7) | 169.2 (165.1, 173.2) | 179.0 (173.3, 184.8) | 152.5 (151.3, 153.8)     | 115.4 (113.0, 117.8) | 141.8 (140.4, 143.2) | 172.5 (171.3, 173.8) | 181.5 (179.6, 183.4) |
| urban-rural difference                            | 1.2 (-0.3, 2.9)          | 1.0 (-0.6, 2.7)      | 1.2 (-0.4, 2.8)      | 1.3 (-0.3, 3.0)      | 1.4 (-0.4, 3.3)      | 0.2 (-0.7, 1.0)          | 0.0 (-1.2, 1.1)      | 0.1 (-0.8, 1.0)      | 0.3 (-0.6, 1.1)      | 0.4 (-0.7, 1.4)      |
| <b>Central Asia, Middle East and north Africa</b> |                          |                      |                      |                      |                      |                          |                      |                      |                      |                      |
| <b>Central Asia</b>                               |                          |                      |                      |                      |                      |                          |                      |                      |                      |                      |
| <b>Armenia</b>                                    |                          |                      |                      |                      |                      |                          |                      |                      |                      |                      |
| rural                                             | 145.4 (142.2, 148.6)     | 116.9 (110.1, 123.7) | 135.2 (131.9, 138.7) | 163.0 (159.1, 166.8) | 169.4 (164.6, 174.1) | 146.1 (144.0, 148.1)     | 116.1 (111.6, 120.7) | 135.3 (132.8, 137.8) | 164.5 (161.6, 167.3) | 172.0 (169.1, 174.9) |
| urban                                             | 146.8 (143.8, 150.0)     | 118.4 (111.6, 125.3) | 136.7 (133.3, 140.1) | 164.4 (160.6, 168.2) | 170.8 (166.0, 175.4) | 147.7 (145.6, 149.7)     | 117.7 (113.2, 122.4) | 136.9 (134.5, 139.3) | 166.0 (163.2, 168.8) | 173.5 (170.7, 176.3) |
| urban-rural difference                            | 1.4 (-0.1, 3.0)          | 1.5 (-0.3, 3.3)      | 1.5 (-0.1, 3.1)      | 1.4 (-0.2, 3.1)      | 1.4 (-0.4, 3.2)      | 1.6 (0.3, 2.9)           | 1.7 (-0.1, 3.3)      | 1.6 (0.2, 2.9)       | 1.5 (0.3, 2.8)       | 1.5 (0.1, 2.9)       |
| <b>Azerbaijan</b>                                 |                          |                      |                      |                      |                      |                          |                      |                      |                      |                      |
| rural                                             | 146.0 (142.7, 149.4)     | 115.4 (106.2, 124.8) | 135.5 (131.6, 139.4) | 164.3 (161.4, 167.2) | 171.7 (169.0, 174.3) | 147.2 (143.0, 151.3)     | 117.0 (106.4, 127.3) | 136.6 (131.7, 141.4) | 165.4 (162.3, 168.5) | 172.8 (170.2, 175.3) |
| urban                                             | 147.2 (143.6, 150.7)     | 116.9 (107.7, 126.2) | 136.8 (132.7, 140.8) | 165.4 (162.3, 168.4) | 172.6 (169.8, 175.4) | 148.7 (144.6, 153.0)     | 118.8 (108.3, 129.2) | 138.2 (133.5, 143.1) | 166.9 (163.8, 170.0) | 174.1 (171.6, 176.6) |
| urban-rural difference                            | 1.2 (-0.4, 2.7)          | 1.4 (-0.6, 3.4)      | 1.2 (-0.4, 2.9)      | 1.1 (-0.5, 2.6)      | 0.9 (-0.7, 2.6)      | 1.6 (0.0, 3.2)           | 1.8 (-0.4, 4.0)      | 1.6 (-0.1, 3.4)      | 1.5 (0.0, 2.9)       | 1.3 (-0.1, 2.8)      |
| <b>Georgia</b>                                    |                          |                      |                      |                      |                      |                          |                      |                      |                      |                      |
| rural                                             | 146.8 (143.5, 150.4)     | 118.7 (112.6, 125.0) | 136.0 (132.4, 139.7) | 164.4 (159.9, 169.0) | 172.6 (166.6, 178.4) | 147.0 (145.1, 148.9)     | 118.4 (114.5, 122.4) | 135.7 (133.4, 138.1) | 164.8 (162.0, 167.7) | 173.9 (171.3, 176.4) |
| urban                                             | 148.3 (144.9, 151.7)     | 120.2 (114.2, 126.5) | 137.4 (133.8, 141.1) | 165.7 (161.2, 170.4) | 173.9 (168.0, 179.7) | 148.6 (146.8, 150.5)     | 120.1 (116.3, 124.1) | 137.4 (135.0, 139.8) | 166.4 (163.6, 169.3) | 175.4 (172.8, 177.9) |
| urban-rural difference                            | 1.4 (-0.3, 3.1)          | 1.5 (-0.3, 3.3)      | 1.4 (-0.2, 3.1)      | 1.4 (-0.4, 3.0)      | 1.3 (-0.6, 3.2)      | 1.6 (0.5, 2.8)           | 1.8 (0.3, 3.2)       | 1.7 (0.5, 2.8)       | 1.6 (0.4, 2.8)       | 1.5 (0.2, 2.9)       |
| <b>Kazakhstan</b>                                 |                          |                      |                      |                      |                      |                          |                      |                      |                      |                      |
| rural                                             | 146.8 (143.1, 150.5)     | 112.8 (107.4, 118.3) | 136.9 (133.3, 140.6) | 166.4 (161.8, 171.0) | 171.9 (165.9, 178.1) | 148.2 (146.7, 149.7)     | 113.7 (111.1, 116.3) | 138.2 (136.5, 139.8) | 168.0 (166.2, 169.8) | 173.5 (171.5, 175.6) |
| urban                                             | 148.8 (145.2, 152.5)     | 114.9 (109.4, 120.6) | 139.0 (135.3, 142.7) | 168.4 (163.9, 172.9) | 173.9 (167.8, 179.9) | 150.6 (149.1, 152.0)     | 116.2 (113.6, 118.8) | 140.6 (139.0, 142.2) | 170.3 (168.6, 172.1) | 175.8 (173.8, 177.8) |
| urban-rural difference                            | 2.0 (0.2, 3.7)           | 2.1 (0.2, 3.9)       | 2.0 (0.3, 3.7)       | 2.0 (0.1, 3.8)       | 1.9 (-0.1, 3.9)      | 2.4 (1.4, 3.3)           | 2.5 (1.3, 3.7)       | 2.4 (1.4, 3.4)       | 2.3 (1.3, 3.3)       | 2.3 (1.0, 3.5)       |
| <b>Kyrgyzstan</b>                                 |                          |                      |                      |                      |                      |                          |                      |                      |                      |                      |

| Boys                                | Mean height in 1990 (cm) |                      |                      |                      |                      | Mean height in 2020 (cm) |                      |                      |                      |                      |
|-------------------------------------|--------------------------|----------------------|----------------------|----------------------|----------------------|--------------------------|----------------------|----------------------|----------------------|----------------------|
|                                     | Age-standardised         | 5 years              | 10 years             | 15 years             | 19 years             | Age-standardised         | 5 years              | 10 years             | 15 years             | 19 years             |
| rural                               | 144.3 (140.9, 147.8)     | 114.2 (108.9, 119.6) | 133.8 (130.2, 137.6) | 162.4 (157.9, 167.2) | 169.7 (163.5, 175.9) | 145.1 (142.7, 147.4)     | 115.1 (111.2, 118.8) | 134.5 (131.8, 137.2) | 163.2 (160.3, 166.2) | 170.6 (167.3, 174.0) |
| urban                               | 146.0 (142.5, 149.6)     | 116.1 (110.7, 121.5) | 135.6 (131.9, 139.4) | 164.1 (159.5, 168.8) | 171.2 (164.9, 177.5) | 147.1 (144.7, 149.4)     | 117.3 (113.3, 121.1) | 136.6 (133.8, 139.3) | 165.2 (162.2, 168.2) | 172.4 (169.1, 176.0) |
| urban-rural difference              | 1.7 (-0.2, 3.5)          | 1.9 (0.0, 3.8)       | 1.8 (-0.1, 3.5)      | 1.6 (-0.4, 3.6)      | 1.5 (-0.8, 3.7)      | 2.0 (0.7, 3.3)           | 2.2 (0.7, 3.8)       | 2.1 (0.8, 3.4)       | 1.9 (0.6, 3.3)       | 1.8 (0.2, 3.4)       |
| <b>Mongolia</b>                     |                          |                      |                      |                      |                      |                          |                      |                      |                      |                      |
| rural                               | 142.9 (139.3, 146.3)     | 112.3 (103.2, 121.6) | 132.5 (128.9, 136.1) | 161.3 (158.0, 164.6) | 168.0 (163.6, 172.3) | 144.3 (141.1, 147.6)     | 113.5 (103.7, 123.5) | 133.8 (130.0, 137.7) | 162.9 (160.9, 164.8) | 169.6 (167.8, 171.4) |
| urban                               | 144.7 (141.2, 148.1)     | 114.2 (104.9, 123.5) | 134.3 (130.7, 137.9) | 163.1 (159.7, 166.3) | 169.6 (165.2, 174.1) | 146.3 (143.0, 149.6)     | 115.7 (105.7, 125.7) | 135.8 (131.9, 139.8) | 164.8 (162.8, 166.8) | 171.5 (169.7, 173.4) |
| urban-rural difference              | 1.8 (0.3, 3.2)           | 1.9 (-0.1, 3.8)      | 1.8 (0.3, 3.3)       | 1.7 (0.3, 3.1)       | 1.6 (0.1, 3.2)       | 2.0 (0.7, 3.4)           | 2.1 (0.1, 4.2)       | 2.0 (0.5, 3.6)       | 1.9 (0.8, 3.1)       | 1.9 (0.8, 2.9)       |
| <b>Tajikistan</b>                   |                          |                      |                      |                      |                      |                          |                      |                      |                      |                      |
| rural                               | 142.4 (138.7, 146.1)     | 112.7 (106.6, 118.9) | 131.9 (128.0, 135.8) | 160.5 (155.6, 165.3) | 167.7 (161.4, 174.1) | 143.0 (141.1, 145.0)     | 114.1 (110.0, 118.2) | 132.5 (130.1, 135.0) | 160.9 (157.8, 163.8) | 167.9 (165.3, 170.6) |
| urban                               | 143.4 (139.6, 147.3)     | 113.6 (107.6, 119.8) | 132.9 (128.9, 136.9) | 161.5 (156.5, 166.4) | 168.7 (162.3, 175.1) | 144.0 (142.0, 146.1)     | 115.1 (111.0, 119.1) | 133.5 (131.0, 136.0) | 161.9 (158.8, 164.9) | 169.0 (166.1, 171.8) |
| urban-rural difference              | 1.0 (-1.0, 2.9)          | 0.9 (-1.0, 2.9)      | 1.0 (-0.9, 2.9)      | 1.0 (-1.0, 3.1)      | 1.0 (-1.3, 3.3)      | 1.0 (-0.4, 2.4)          | 1.0 (-0.7, 2.6)      | 1.0 (-0.4, 2.4)      | 1.0 (-0.4, 2.4)      | 1.0 (-0.6, 2.7)      |
| <b>Turkmenistan</b>                 |                          |                      |                      |                      |                      |                          |                      |                      |                      |                      |
| rural                               | 145.0 (141.2, 148.5)     | 115.5 (109.2, 122.0) | 134.3 (130.4, 138.1) | 162.9 (157.9, 167.7) | 170.7 (164.2, 177.0) | 145.8 (143.5, 148.1)     | 115.5 (110.5, 120.6) | 134.8 (131.9, 137.7) | 164.1 (161.1, 167.1) | 172.7 (170.3, 175.0) |
| urban                               | 146.2 (142.5, 149.9)     | 116.8 (110.6, 123.4) | 135.6 (131.7, 139.5) | 164.1 (159.2, 169.0) | 171.9 (165.5, 178.3) | 147.2 (145.0, 149.6)     | 117.0 (112.1, 122.2) | 136.2 (133.3, 139.2) | 165.5 (162.6, 168.5) | 174.0 (171.7, 176.4) |
| urban-rural difference              | 1.3 (-0.5, 3.1)          | 1.4 (-0.6, 3.3)      | 1.3 (-0.5, 3.1)      | 1.2 (-0.7, 3.1)      | 1.2 (-0.9, 3.3)      | 1.4 (0.1, 2.8)           | 1.5 (-0.2, 3.3)      | 1.5 (0.0, 2.9)       | 1.4 (0.1, 2.8)       | 1.3 (-0.1, 2.8)      |
| <b>Uzbekistan</b>                   |                          |                      |                      |                      |                      |                          |                      |                      |                      |                      |
| rural                               | 145.4 (141.9, 149.1)     | 114.5 (105.4, 123.5) | 135.0 (131.1, 138.9) | 163.9 (160.7, 167.3) | 170.6 (166.9, 174.3) | 145.6 (141.5, 149.7)     | 115.8 (105.6, 126.2) | 135.4 (130.6, 140.3) | 163.7 (160.6, 166.7) | 169.9 (167.7, 172.0) |
| urban                               | 146.3 (142.8, 149.9)     | 115.6 (106.5, 124.7) | 136.0 (132.3, 139.9) | 164.8 (161.5, 168.2) | 171.3 (167.7, 175.1) | 147.1 (143.0, 151.2)     | 117.5 (107.3, 127.8) | 136.9 (132.1, 141.8) | 165.0 (162.0, 168.1) | 171.1 (168.8, 173.4) |
| urban-rural difference              | 1.0 (-0.6, 2.4)          | 1.2 (-0.8, 3.1)      | 1.0 (-0.6, 2.5)      | 0.9 (-0.6, 2.3)      | 0.8 (-0.9, 2.3)      | 1.5 (-0.1, 3.0)          | 1.6 (-0.6, 3.9)      | 1.5 (-0.2, 3.2)      | 1.4 (0.0, 2.8)       | 1.3 (-0.1, 2.6)      |
| <b>Middle East and north Africa</b> |                          |                      |                      |                      |                      |                          |                      |                      |                      |                      |
| <b>Algeria</b>                      |                          |                      |                      |                      |                      |                          |                      |                      |                      |                      |
| rural                               | 143.4 (139.2, 147.7)     | 108.6 (99.9, 117.6)  | 134.2 (129.6, 138.9) | 161.9 (157.9, 166.0) | 169.5 (164.8, 174.3) | 146.4 (142.1, 150.9)     | 110.5 (100.2, 120.6) | 136.8 (131.7, 142.1) | 165.5 (161.9, 169.0) | 173.6 (171.0, 176.3) |
| urban                               | 145.0 (141.0, 149.1)     | 110.2 (101.6, 119.2) | 135.8 (131.4, 140.4) | 163.4 (159.5, 167.5) | 171.0 (166.3, 175.8) | 148.0 (143.6, 152.4)     | 112.2 (102.1, 122.3) | 138.4 (133.4, 143.7) | 167.0 (163.7, 170.5) | 175.2 (172.7, 177.6) |
| urban-rural difference              | 1.6 (-0.1, 3.3)          | 1.6 (-0.4, 3.7)      | 1.6 (-0.2, 3.4)      | 1.5 (-0.2, 3.3)      | 1.5 (-0.4, 3.4)      | 1.6 (0.0, 3.3)           | 1.7 (-0.5, 4.0)      | 1.6 (-0.1, 3.5)      | 1.6 (0.1, 3.1)       | 1.6 (0.0, 3.1)       |
| <b>Bahrain</b>                      |                          |                      |                      |                      |                      |                          |                      |                      |                      |                      |
| rural                               | 143.2 (139.7, 146.8)     | 109.2 (100.5, 118.0) | 134.6 (130.8, 138.5) | 161.4 (158.0, 164.7) | 167.0 (163.0, 171.1) | 147.5 (143.9, 151.0)     | 111.8 (102.5, 120.9) | 138.3 (134.4, 142.2) | 166.6 (163.9, 169.1) | 173.0 (169.8, 176.2) |
| urban                               | 144.7 (141.5, 148.0)     | 110.9 (102.3, 119.3) | 136.2 (132.6, 139.9) | 162.8 (159.8, 165.9) | 168.4 (164.6, 172.0) | 149.2 (146.1, 152.4)     | 113.6 (104.6, 122.5) | 140.0 (136.5, 143.7) | 168.2 (166.1, 170.3) | 174.5 (171.7, 177.3) |
| urban-rural difference              | 1.5 (-0.4, 3.5)          | 1.6 (-0.6, 3.9)      | 1.5 (-0.5, 3.6)      | 1.5 (-0.5, 3.5)      | 1.4 (-0.8, 3.5)      | 1.7 (-0.3, 3.6)          | 1.8 (-0.6, 4.2)      | 1.7 (-0.3, 3.7)      | 1.6 (-0.3, 3.4)      | 1.5 (-0.4, 3.4)      |
| <b>Egypt</b>                        |                          |                      |                      |                      |                      |                          |                      |                      |                      |                      |
| rural                               | 142.4 (140.2, 144.6)     | 107.6 (104.0, 111.3) | 131.5 (129.4, 133.7) | 161.0 (158.5, 163.6) | 172.6 (169.2, 176.1) | 147.3 (144.6, 150.1)     | 116.0 (109.7, 122.4) | 137.5 (134.3, 140.8) | 164.6 (162.7, 166.5) | 173.7 (172.1, 175.4) |
| urban                               | 143.6 (141.3, 145.9)     | 109.0 (105.4, 112.8) | 132.9 (130.6, 135.0) | 162.2 (159.6, 164.8) | 173.8 (170.3, 177.4) | 148.7 (146.1, 151.4)     | 117.5 (111.5, 123.7) | 138.9 (135.7, 142.2) | 165.9 (164.0, 167.8) | 175.0 (173.3, 176.6) |
| urban-rural difference              | 1.3 (-0.1, 2.6)          | 1.4 (-0.3, 3.0)      | 1.3 (-0.1, 2.7)      | 1.2 (-0.2, 2.5)      | 1.2 (-0.4, 2.7)      | 1.4 (0.3, 2.5)           | 1.5 (-0.2, 3.3)      | 1.4 (0.2, 2.7)       | 1.3 (0.3, 2.3)       | 1.3 (0.2, 2.3)       |
| <b>Iran</b>                         |                          |                      |                      |                      |                      |                          |                      |                      |                      |                      |
| rural                               | 142.4 (141.3, 143.5)     | 106.9 (105.5, 108.2) | 132.5 (131.3, 133.7) | 161.3 (160.1, 162.5) | 170.3 (168.6, 172.0) | 145.1 (144.1, 146.2)     | 108.1 (105.7, 110.4) | 135.0 (133.8, 136.1) | 164.9 (163.9, 165.8) | 173.7 (172.7, 174.8) |
| urban                               | 144.9 (143.8, 145.9)     | 108.9 (107.6, 110.2) | 134.8 (133.7, 136.0) | 163.9 (162.8, 165.1) | 173.2 (171.5, 174.8) | 147.5 (146.5, 148.6)     | 110.0 (107.7, 112.5) | 137.3 (136.1, 138.4) | 167.5 (166.5, 168.4) | 176.5 (175.5, 177.6) |
| urban-rural difference              | 2.5 (1.8, 3.2)           | 2.0 (1.2, 2.9)       | 2.3 (1.6, 3.1)       | 2.6 (2.0, 3.3)       | 2.9 (2.1, 3.6)       | 2.4 (1.8, 3.0)           | 2.0 (1.2, 2.8)       | 2.3 (1.7, 2.9)       | 2.6 (2.0, 3.2)       | 2.8 (2.2, 3.4)       |
| <b>Iraq</b>                         |                          |                      |                      |                      |                      |                          |                      |                      |                      |                      |
| rural                               | 145.1 (141.6, 148.6)     | 110.1 (101.6, 118.6) | 136.3 (132.5, 140.2) | 163.7 (160.4, 167.1) | 169.9 (165.9, 174.0) | 148.3 (144.4, 152.2)     | 113.5 (104.1, 122.8) | 139.4 (135.0, 143.9) | 166.9 (163.9, 170.0) | 172.9 (170.4, 175.5) |
| urban                               | 146.4 (143.0, 149.9)     | 111.6 (103.2, 120.2) | 137.6 (134.1, 141.4) | 164.9 (161.8, 168.1) | 171.0 (167.1, 174.9) | 149.8 (146.1, 153.5)     | 115.2 (105.9, 124.5) | 141.0 (136.7, 145.2) | 168.3 (165.6, 171.1) | 174.2 (171.8, 176.6) |
| urban-rural difference              | 1.3 (-0.5, 3.1)          | 1.5 (-0.5, 3.5)      | 1.4 (-0.4, 3.2)      | 1.3 (-0.6, 3.0)      | 1.1 (-0.8, 3.1)      | 1.5 (-0.2, 3.2)          | 1.7 (-0.5, 4.0)      | 1.5 (-0.3, 3.3)      | 1.4 (-0.2, 2.9)      | 1.3 (-0.3, 2.9)      |
| <b>Jordan</b>                       |                          |                      |                      |                      |                      |                          |                      |                      |                      |                      |
| rural                               | 144.2 (141.6, 146.6)     | 104.8 (100.9, 108.5) | 134.6 (132.1, 137.2) | 164.2 (160.9, 167.4) | 173.0 (168.5, 177.2) | 147.5 (145.3, 149.7)     | 110.2 (106.0, 114.4) | 138.4 (135.8, 141.1) | 166.7 (164.6, 168.7) | 174.0 (172.1, 175.9) |
| urban                               | 145.3 (142.6, 147.8)     | 106.0 (102.3, 109.7) | 135.8 (133.1, 138.3) | 165.2 (161.8, 168.6) | 173.9 (169.3, 178.4) | 148.8 (146.8, 150.9)     | 111.7 (107.9, 115.6) | 139.9 (137.4, 142.4) | 168.0 (166.1, 169.9) | 175.2 (173.6, 177.0) |
| urban-rural difference              | 1.1 (-0.4, 2.4)          | 1.3 (-0.4, 2.8)      | 1.1 (-0.3, 2.5)      | 1.0 (-0.5, 2.4)      | 0.9 (-0.8, 2.4)      | 1.4 (0.2, 2.6)           | 1.6 (-0.1, 3.2)      | 1.4 (0.1, 2.8)       | 1.3 (0.2, 2.5)       | 1.2 (0.0, 2.4)       |
| <b>Kuwait</b>                       |                          |                      |                      |                      |                      |                          |                      |                      |                      |                      |
| rural                               | 145.9 (143.6, 148.2)     | 109.7 (106.9, 112.5) | 137.2 (134.8, 139.6) | 165.4 (162.7, 168.0) | 169.8 (166.2, 173.4) | 147.7 (144.9, 150.5)     | 111.5 (106.6, 116.5) | 138.9 (135.6, 142.2) | 167.3 (164.9, 169.7) | 171.7 (169.4, 174.1) |
| urban                               | 147.6 (146.2, 149.0)     | 111.5 (109.8, 113.2) | 139.0 (137.6, 140.4) | 167.1 (165.2, 169.0) | 171.4 (168.5, 174.3) | 149.4 (147.2, 151.6)     | 113.2 (108.7, 117.7) | 140.6 (137.8, 143.3) | 168.9 (167.3, 170.6) | 173.3 (171.9, 174.8) |
| urban-rural difference              | 1.7 (-0.3, 3.7)          | 1.8 (-0.4, 4.0)      | 1.7 (-0.3, 3.8)      | 1.7 (-0.3, 3.7)      | 1.6 (-0.5, 3.9)      | 1.6 (-0.3, 3.6)          | 1.7 (-0.6, 4.1)      | 1.7 (-0.3, 3.7)      | 1.6 (-0.2, 3.5)      | 1.6 (-0.3, 3.5)      |
| <b>Lebanon</b>                      |                          |                      |                      |                      |                      |                          |                      |                      |                      |                      |
| rural                               | 146.8 (144.7, 149.0)     | 108.5 (105.9, 111.0) | 137.9 (135.6, 140.1) | 166.5 (164.0, 169.0) | 173.4 (170.8, 176.0) | 151.1 (148.4, 153.8)     | 112.9 (108.0, 117.9) | 142.1 (138.8, 145.4) | 170.8 (168.4, 173.2) | 177.4 (175.1, 179.7) |
| urban                               | 148.6 (146.5, 150.6)     | 110.1 (107.4, 112.6) | 139.6 (137.4, 141.7) | 168.3 (165.9, 170.6) | 175.3 (172.8, 177.8) | 152.6 (150.0, 155.2)     | 114.3 (109.4, 119.3) | 143.6 (140.4, 146.8) | 172.4 (170.2, 174.6) | 179.1 (176.8, 181.3) |

| Boys                           | Mean height in 1990 (cm) |                      |                      |                      |                      | Mean height in 2020 (cm) |                      |                      |                      |                      |
|--------------------------------|--------------------------|----------------------|----------------------|----------------------|----------------------|--------------------------|----------------------|----------------------|----------------------|----------------------|
|                                | Age-standardised         | 5 years              | 10 years             | 15 years             | 19 years             | Age-standardised         | 5 years              | 10 years             | 15 years             | 19 years             |
| urban-rural difference         | 1.7 (0.6, 2.9)           | 1.6 (0.2, 3.0)       | 1.7 (0.5, 2.9)       | 1.8 (0.6, 3.0)       | 1.9 (0.5, 3.3)       | 1.5 (0.2, 2.8)           | 1.4 (-0.3, 3.1)      | 1.5 (0.1, 2.9)       | 1.6 (0.3, 2.9)       | 1.7 (0.4, 3.0)       |
| Libya                          |                          |                      |                      |                      |                      |                          |                      |                      |                      |                      |
| rural                          | 145.0 (140.6, 149.3)     | 109.3 (100.4, 118.2) | 135.6 (131.1, 140.1) | 163.8 (159.2, 168.2) | 171.8 (166.4, 177.4) | 147.9 (143.0, 152.7)     | 112.2 (102.1, 122.6) | 138.3 (132.9, 143.9) | 166.8 (162.5, 171.1) | 174.7 (170.7, 178.6) |
| urban                          | 146.6 (142.2, 150.7)     | 111.0 (102.2, 119.8) | 137.2 (132.7, 141.6) | 165.4 (160.9, 169.7) | 173.3 (168.0, 178.6) | 149.5 (144.7, 154.3)     | 113.8 (103.9, 124.2) | 140.0 (134.6, 145.6) | 168.4 (164.2, 172.5) | 176.2 (172.4, 180.1) |
| urban-rural difference         | 1.6 (-0.3, 3.5)          | 1.7 (-0.5, 3.9)      | 1.6 (-0.3, 3.6)      | 1.5 (-0.4, 3.5)      | 1.5 (-0.7, 3.7)      | 1.6 (-0.3, 3.5)          | 1.7 (-0.7, 4.0)      | 1.6 (-0.4, 3.6)      | 1.6 (-0.2, 3.4)      | 1.5 (-0.3, 3.5)      |
| Morocco                        |                          |                      |                      |                      |                      |                          |                      |                      |                      |                      |
| rural                          | 143.3 (139.8, 146.8)     | 110.5 (104.9, 116.1) | 133.5 (129.9, 137.1) | 161.1 (156.9, 165.4) | 170.2 (164.3, 176.3) | 145.9 (144.1, 147.7)     | 112.4 (109.5, 115.3) | 135.7 (133.6, 137.8) | 164.2 (162.1, 166.3) | 173.9 (171.5, 176.2) |
| urban                          | 145.1 (141.6, 148.6)     | 112.5 (107.0, 118.0) | 135.4 (131.7, 138.9) | 162.9 (158.7, 167.1) | 171.9 (165.9, 177.9) | 147.9 (146.1, 149.7)     | 114.6 (111.7, 117.5) | 137.7 (135.7, 139.9) | 166.2 (164.1, 168.3) | 175.8 (173.3, 178.1) |
| urban-rural difference         | 1.8 (0.1, 3.5)           | 2.0 (0.2, 3.8)       | 1.9 (0.2, 3.6)       | 1.8 (0.0, 3.5)       | 1.7 (-0.3, 3.6)      | 2.0 (0.8, 3.2)           | 2.2 (0.6, 3.7)       | 2.1 (0.8, 3.3)       | 1.9 (0.8, 3.1)       | 1.9 (0.5, 3.2)       |
| Occupied Palestinian Territory |                          |                      |                      |                      |                      |                          |                      |                      |                      |                      |
| rural                          | 144.3 (141.2, 147.5)     | 108.2 (99.8, 116.2)  | 134.8 (131.4, 138.2) | 163.3 (160.5, 166.0) | 171.6 (168.4, 174.7) | 146.8 (142.9, 150.6)     | 110.9 (101.4, 120.3) | 137.1 (132.8, 141.5) | 165.8 (162.9, 168.6) | 174.0 (171.1, 176.8) |
| urban                          | 145.0 (141.9, 148.2)     | 109.1 (100.8, 117.4) | 135.6 (132.3, 139.0) | 163.9 (161.2, 166.7) | 172.1 (168.8, 175.3) | 147.8 (144.0, 151.5)     | 112.2 (102.9, 121.6) | 138.2 (133.8, 142.5) | 166.7 (164.0, 169.3) | 174.8 (172.1, 177.3) |
| urban-rural difference         | 0.7 (-1.0, 2.4)          | 1.0 (-1.0, 3.0)      | 0.8 (-1.0, 2.5)      | 0.6 (-1.1, 2.3)      | 0.5 (-1.3, 2.2)      | 1.0 (-0.8, 2.8)          | 1.2 (-1.1, 3.6)      | 1.1 (-0.9, 3.0)      | 0.9 (-0.8, 2.6)      | 0.8 (-0.9, 2.5)      |
| Oman                           |                          |                      |                      |                      |                      |                          |                      |                      |                      |                      |
| rural                          | 141.0 (137.3, 144.7)     | 105.2 (97.0, 113.9)  | 131.3 (127.7, 135.0) | 159.9 (156.0, 163.8) | 168.5 (163.3, 173.9) | 144.3 (140.7, 147.8)     | 110.5 (101.1, 120.0) | 135.1 (131.1, 139.3) | 162.4 (160.0, 164.8) | 169.7 (167.2, 172.2) |
| urban                          | 142.5 (138.9, 146.1)     | 106.8 (98.6, 115.3)  | 132.8 (129.3, 136.3) | 161.3 (157.5, 165.3) | 169.9 (164.7, 175.4) | 145.8 (142.4, 149.4)     | 112.1 (102.7, 121.9) | 136.7 (132.7, 140.7) | 163.9 (161.7, 166.0) | 171.1 (168.9, 173.3) |
| urban-rural difference         | 1.5 (-0.2, 3.1)          | 1.6 (-0.5, 3.5)      | 1.5 (-0.3, 3.1)      | 1.4 (-0.3, 3.0)      | 1.4 (-0.5, 3.1)      | 1.5 (-0.2, 3.3)          | 1.6 (-0.6, 3.9)      | 1.5 (-0.3, 3.4)      | 1.5 (-0.1, 3.1)      | 1.4 (-0.2, 3.0)      |
| Qatar                          |                          |                      |                      |                      |                      |                          |                      |                      |                      |                      |
| rural                          | 142.8 (138.7, 146.8)     | 107.3 (98.6, 115.7)  | 133.6 (129.4, 137.8) | 161.6 (157.4, 166.0) | 168.6 (163.1, 174.2) | 146.1 (141.8, 150.4)     | 110.6 (100.7, 120.3) | 136.8 (131.8, 141.9) | 165.0 (161.6, 168.4) | 171.8 (168.8, 174.9) |
| urban                          | 144.3 (140.6, 148.0)     | 109.0 (100.5, 117.3) | 135.2 (131.4, 139.0) | 163.0 (159.1, 167.1) | 170.0 (164.9, 175.3) | 147.6 (143.5, 151.7)     | 112.3 (102.5, 122.1) | 138.4 (133.6, 143.2) | 166.5 (163.4, 169.5) | 173.3 (170.7, 176.0) |
| urban-rural difference         | 1.5 (-0.4, 3.5)          | 1.6 (-0.6, 3.8)      | 1.6 (-0.4, 3.5)      | 1.5 (-0.5, 3.5)      | 1.4 (-0.7, 3.6)      | 1.6 (-0.3, 3.5)          | 1.7 (-0.7, 4.1)      | 1.6 (-0.4, 3.6)      | 1.5 (-0.3, 3.4)      | 1.5 (-0.4, 3.4)      |
| Saudi Arabia                   |                          |                      |                      |                      |                      |                          |                      |                      |                      |                      |
| rural                          | 140.1 (138.4, 141.9)     | 106.6 (104.2, 109.1) | 132.2 (130.3, 134.1) | 157.8 (155.9, 159.7) | 162.6 (160.2, 165.0) | 142.7 (140.3, 145.3)     | 106.2 (101.4, 110.8) | 133.4 (130.5, 136.4) | 162.0 (160.0, 164.1) | 169.4 (167.3, 171.4) |
| urban                          | 141.3 (139.9, 142.7)     | 107.5 (105.4, 109.6) | 133.3 (131.6, 135.0) | 159.1 (157.4, 160.6) | 164.0 (161.8, 166.2) | 143.6 (141.4, 145.8)     | 106.7 (102.4, 111.1) | 134.1 (131.4, 136.8) | 163.0 (161.1, 164.9) | 170.5 (168.6, 172.4) |
| urban-rural difference         | 1.2 (-0.3, 2.7)          | 0.9 (-1.0, 2.7)      | 1.1 (-0.5, 2.6)      | 1.3 (-0.2, 2.8)      | 1.5 (-0.1, 3.2)      | 0.8 (-0.6, 2.2)          | 0.5 (-1.5, 2.5)      | 0.8 (-0.8, 2.3)      | 1.0 (-0.3, 2.2)      | 1.2 (-0.1, 2.4)      |
| Syrian Arab Republic           |                          |                      |                      |                      |                      |                          |                      |                      |                      |                      |
| rural                          | 143.4 (136.8, 150.0)     | 107.8 (97.6, 117.9)  | 134.1 (127.5, 140.6) | 162.3 (155.5, 168.9) | 169.9 (161.6, 178.0) | 146.4 (139.8, 153.2)     | 110.9 (99.9, 121.9)  | 137.0 (130.2, 144.0) | 165.4 (159.1, 171.7) | 172.8 (165.8, 180.0) |
| urban                          | 145.0 (138.3, 151.6)     | 109.5 (99.3, 119.4)  | 135.7 (129.2, 142.1) | 163.8 (157.0, 170.4) | 171.4 (163.2, 179.6) | 148.0 (141.3, 154.6)     | 112.6 (101.4, 123.4) | 138.7 (131.8, 145.6) | 166.9 (160.6, 173.2) | 174.3 (167.3, 181.4) |
| urban-rural difference         | 1.6 (-0.4, 3.6)          | 1.7 (-0.6, 3.9)      | 1.6 (-0.4, 3.6)      | 1.5 (-0.5, 3.5)      | 1.5 (-0.7, 3.7)      | 1.6 (-0.3, 3.5)          | 1.7 (-0.7, 4.1)      | 1.6 (-0.3, 3.7)      | 1.6 (-0.3, 3.4)      | 1.5 (-0.4, 3.4)      |
| Tunisia                        |                          |                      |                      |                      |                      |                          |                      |                      |                      |                      |
| rural                          | 144.1 (142.0, 146.1)     | 108.1 (105.7, 110.4) | 134.9 (132.8, 137.1) | 163.0 (160.6, 165.2) | 170.3 (167.7, 172.8) | 147.1 (144.3, 150.0)     | 109.3 (104.4, 114.1) | 137.5 (134.2, 140.8) | 166.9 (164.3, 169.5) | 174.9 (172.0, 177.7) |
| urban                          | 146.8 (144.8, 148.8)     | 110.7 (108.4, 113.0) | 137.7 (135.5, 139.8) | 165.7 (163.4, 168.0) | 173.1 (170.5, 175.6) | 149.5 (146.8, 152.2)     | 111.6 (106.8, 116.2) | 139.9 (136.7, 143.0) | 169.3 (166.7, 171.8) | 177.3 (174.5, 180.1) |
| urban-rural difference         | 2.7 (1.6, 3.9)           | 2.7 (1.3, 4.1)       | 2.7 (1.6, 3.9)       | 2.8 (1.6, 4.0)       | 2.8 (1.4, 4.3)       | 2.4 (0.9, 3.7)           | 2.3 (0.4, 4.1)       | 2.4 (0.8, 3.8)       | 2.4 (1.0, 3.7)       | 2.4 (1.0, 3.8)       |
| Turkey                         |                          |                      |                      |                      |                      |                          |                      |                      |                      |                      |
| rural                          | 145.9 (143.7, 148.2)     | 110.2 (106.0, 114.6) | 136.5 (133.9, 139.1) | 165.1 (162.3, 167.9) | 172.2 (168.5, 176.0) | 148.2 (146.4, 149.9)     | 111.9 (108.6, 115.2) | 138.5 (136.0, 140.8) | 167.7 (165.6, 169.6) | 175.0 (173.0, 177.1) |
| urban                          | 147.5 (145.2, 149.8)     | 112.2 (107.9, 116.6) | 138.1 (135.5, 140.7) | 166.4 (163.5, 169.3) | 173.3 (169.4, 177.1) | 150.1 (148.4, 151.8)     | 114.3 (111.0, 117.5) | 140.5 (138.2, 142.8) | 169.4 (167.4, 171.3) | 176.5 (174.5, 178.4) |
| urban-rural difference         | 1.5 (0.2, 2.8)           | 2.0 (0.5, 3.6)       | 1.7 (0.3, 3.0)       | 1.3 (0.0, 2.6)       | 1.1 (-0.4, 2.5)      | 1.9 (0.8, 3.0)           | 2.4 (1.0, 3.8)       | 2.0 (0.9, 3.2)       | 1.7 (0.7, 2.7)       | 1.4 (0.3, 2.6)       |
| United Arab Emirates           |                          |                      |                      |                      |                      |                          |                      |                      |                      |                      |
| rural                          | 146.3 (142.8, 149.9)     | 113.1 (105.2, 121.3) | 137.7 (134.4, 141.0) | 164.2 (160.2, 168.3) | 170.0 (164.4, 175.5) | 150.1 (146.7, 153.6)     | 116.7 (107.7, 125.9) | 141.4 (137.5, 145.3) | 168.2 (165.8, 170.7) | 173.8 (171.4, 176.3) |
| urban                          | 147.5 (144.1, 150.9)     | 114.5 (106.7, 122.6) | 138.9 (135.8, 142.1) | 165.3 (161.3, 169.3) | 170.9 (165.4, 176.4) | 151.5 (148.3, 154.6)     | 118.2 (109.3, 127.3) | 142.8 (139.2, 146.5) | 169.5 (167.4, 171.4) | 174.9 (172.9, 177.1) |
| urban-rural difference         | 1.2 (-0.7, 3.0)          | 1.4 (-0.6, 3.6)      | 1.3 (-0.6, 3.1)      | 1.1 (-0.8, 2.8)      | 1.0 (-1.0, 2.9)      | 1.4 (-0.4, 3.2)          | 1.6 (-0.6, 4.0)      | 1.4 (-0.4, 3.3)      | 1.2 (-0.5, 2.9)      | 1.1 (-0.6, 2.8)      |
| Yemen                          |                          |                      |                      |                      |                      |                          |                      |                      |                      |                      |
| rural                          | 135.8 (133.0, 138.6)     | 98.1 (94.9, 101.3)   | 126.0 (123.3, 128.8) | 155.2 (151.5, 158.8) | 165.0 (160.3, 169.8) | 138.0 (134.8, 141.1)     | 103.7 (98.4, 109.2)  | 129.0 (125.3, 132.8) | 155.9 (153.0, 158.8) | 163.9 (161.1, 166.7) |
| urban                          | 136.9 (134.1, 139.7)     | 99.3 (96.1, 102.5)   | 127.2 (124.4, 129.9) | 156.3 (152.6, 159.9) | 166.1 (161.4, 170.9) | 139.1 (136.0, 142.3)     | 104.9 (99.6, 110.4)  | 130.2 (126.4, 134.0) | 157.0 (154.2, 159.8) | 165.0 (162.3, 167.8) |
| urban-rural difference         | 1.1 (-0.1, 2.4)          | 1.2 (-0.2, 2.6)      | 1.2 (-0.1, 2.4)      | 1.1 (-0.2, 2.4)      | 1.1 (-0.4, 2.6)      | 1.2 (0.0, 2.3)           | 1.2 (-0.3, 2.7)      | 1.2 (0.0, 2.4)       | 1.1 (0.1, 2.3)       | 1.1 (-0.1, 2.3)      |
| <b>East and southeast Asia</b> |                          |                      |                      |                      |                      |                          |                      |                      |                      |                      |
| <i>East Asia</i>               |                          |                      |                      |                      |                      |                          |                      |                      |                      |                      |
| China                          |                          |                      |                      |                      |                      |                          |                      |                      |                      |                      |
| rural                          | 141.5 (140.8, 142.3)     | 105.5 (104.7, 106.4) | 132.4 (131.6, 133.2) | 161.4 (160.5, 162.2) | 166.0 (165.0, 167.1) | 150.2 (149.1, 151.3)     | 112.6 (110.2, 115.1) | 140.9 (139.7, 142.1) | 170.7 (169.7, 171.6) | 175.4 (174.4, 176.5) |
| urban                          | 144.9 (144.2, 145.7)     | 109.2 (108.3, 110.0) | 135.9 (135.1, 136.7) | 164.6 (163.8, 165.5) | 169.1 (168.0, 170.1) | 152.2 (151.1, 153.3)     | 115.0 (112.5, 117.4) | 143.0 (141.8, 144.2) | 172.6 (171.6, 173.5) | 177.2 (176.2, 178.2) |
| urban-rural difference         | 3.4 (2.9, 3.9)           | 3.7 (3.1, 4.2)       | 3.5 (3.0, 3.9)       | 3.3 (2.8, 3.8)       | 3.1 (2.5, 3.7)       | 2.1 (1.4, 2.7)           | 2.3 (1.6, 3.1)       | 2.1 (1.5, 2.8)       | 1.9 (1.3, 2.5)       | 1.8 (1.1, 2.4)       |

| Boys                   | Mean height in 1990 (cm) |                      |                      |                      |                      | Mean height in 2020 (cm) |                      |                      |                      |                      |
|------------------------|--------------------------|----------------------|----------------------|----------------------|----------------------|--------------------------|----------------------|----------------------|----------------------|----------------------|
|                        | Age-standardised         | 5 years              | 10 years             | 15 years             | 19 years             | Age-standardised         | 5 years              | 10 years             | 15 years             | 19 years             |
| North Korea            |                          |                      |                      |                      |                      |                          |                      |                      |                      |                      |
| rural                  | 142.9 (135.3, 150.4)     | 106.5 (94.7, 118.3)  | 134.1 (126.4, 141.6) | 162.8 (154.9, 170.4) | 166.9 (157.4, 176.3) | 148.4 (140.7, 156.0)     | 111.9 (99.5, 124.6)  | 139.7 (131.9, 147.5) | 168.3 (160.9, 175.5) | 172.2 (163.8, 180.3) |
| urban                  | 145.6 (137.9, 153.1)     | 109.3 (97.6, 121.0)  | 136.8 (129.4, 144.3) | 165.4 (157.5, 173.1) | 169.4 (159.7, 178.9) | 150.0 (142.3, 157.6)     | 113.8 (101.5, 126.4) | 141.4 (133.5, 149.2) | 169.8 (162.6, 176.9) | 173.6 (165.4, 181.7) |
| urban-rural difference | 2.7 (0.5, 4.7)           | 2.8 (0.6, 5.1)       | 2.7 (0.6, 4.8)       | 2.6 (0.4, 4.7)       | 2.5 (0.1, 4.9)       | 1.6 (-0.5, 3.7)          | 1.8 (-0.8, 4.4)      | 1.7 (-0.5, 3.9)      | 1.5 (-0.5, 3.6)      | 1.4 (-0.6, 3.5)      |
| Taiwan                 |                          |                      |                      |                      |                      |                          |                      |                      |                      |                      |
| rural                  | 146.1 (143.9, 148.2)     | 108.1 (105.7, 110.6) | 137.6 (135.6, 139.5) | 166.5 (163.9, 169.1) | 169.5 (165.6, 173.4) | 150.3 (148.7, 152.0)     | 113.1 (110.0, 116.2) | 142.1 (140.1, 144.1) | 170.5 (169.0, 171.9) | 172.9 (171.1, 174.8) |
| urban                  | 148.2 (146.2, 150.2)     | 110.5 (108.3, 112.8) | 139.8 (138.0, 141.7) | 168.6 (166.2, 171.1) | 171.5 (167.7, 175.3) | 151.4 (149.8, 152.9)     | 114.3 (111.2, 117.4) | 143.2 (141.3, 145.1) | 171.4 (170.0, 172.7) | 173.7 (172.0, 175.5) |
| urban-rural difference | 2.2 (0.6, 3.6)           | 2.4 (0.7, 4.1)       | 2.2 (0.7, 3.7)       | 2.1 (0.4, 3.6)       | 1.9 (0.1, 3.7)       | 1.0 (-0.1, 2.1)          | 1.3 (-0.3, 2.8)      | 1.1 (-0.1, 2.3)      | 0.9 (-0.1, 1.9)      | 0.8 (-0.3, 1.9)      |
| Southeast Asia         |                          |                      |                      |                      |                      |                          |                      |                      |                      |                      |
| Brunei Darussalam      |                          |                      |                      |                      |                      |                          |                      |                      |                      |                      |
| rural                  | 140.8 (137.7, 144.1)     | 105.0 (101.1, 109.0) | 132.3 (129.2, 135.5) | 160.3 (156.3, 164.2) | 163.3 (157.9, 168.6) | 144.9 (142.8, 147.1)     | 110.5 (106.1, 115.2) | 137.0 (134.4, 139.7) | 163.7 (162.0, 165.5) | 165.7 (164.0, 167.6) |
| urban                  | 142.7 (139.4, 145.9)     | 107.0 (103.2, 111.0) | 134.2 (131.1, 137.4) | 162.1 (158.1, 166.0) | 165.1 (159.7, 170.4) | 145.9 (143.9, 148.0)     | 111.6 (107.2, 116.2) | 138.0 (135.6, 140.5) | 164.6 (163.0, 166.2) | 166.6 (164.9, 168.3) |
| urban-rural difference | 1.9 (0.4, 3.3)           | 2.0 (0.3, 3.7)       | 1.9 (0.5, 3.4)       | 1.8 (0.3, 3.4)       | 1.8 (0.1, 3.5)       | 1.0 (-0.3, 2.3)          | 1.1 (-0.7, 2.9)      | 1.0 (-0.4, 2.4)      | 0.9 (-0.3, 2.1)      | 0.9 (-0.4, 2.1)      |
| Cambodia               |                          |                      |                      |                      |                      |                          |                      |                      |                      |                      |
| rural                  | 137.3 (133.0, 141.5)     | 102.5 (94.0, 111.1)  | 128.1 (123.7, 132.5) | 156.4 (151.9, 160.9) | 161.2 (155.6, 167.0) | 141.8 (136.9, 146.6)     | 107.1 (97.0, 117.1)  | 132.9 (127.4, 138.4) | 160.8 (156.7, 165.0) | 164.9 (161.3, 168.7) |
| urban                  | 139.9 (135.6, 144.3)     | 105.4 (96.7, 114.0)  | 130.7 (126.2, 135.4) | 158.9 (154.4, 163.6) | 163.6 (157.9, 169.7) | 143.7 (138.8, 148.7)     | 109.2 (99.2, 119.5)  | 134.8 (129.3, 140.5) | 162.6 (158.4, 166.8) | 166.6 (162.7, 170.4) |
| urban-rural difference | 2.6 (0.7, 4.5)           | 2.8 (0.7, 4.9)       | 2.7 (0.7, 4.6)       | 2.5 (0.5, 4.5)       | 2.4 (0.2, 4.5)       | 1.9 (0.0, 3.8)           | 2.1 (-0.2, 4.5)      | 2.0 (0.0, 3.9)       | 1.8 (0.0, 3.6)       | 1.7 (-0.2, 3.5)      |
| Indonesia              |                          |                      |                      |                      |                      |                          |                      |                      |                      |                      |
| rural                  | 135.9 (134.6, 137.2)     | 102.3 (100.8, 103.8) | 126.2 (124.8, 127.5) | 154.7 (153.2, 156.1) | 160.7 (158.8, 162.6) | 140.1 (138.8, 141.3)     | 105.5 (102.9, 108.1) | 130.4 (129.0, 131.8) | 159.3 (158.2, 160.4) | 164.7 (163.5, 166.0) |
| urban                  | 139.1 (137.8, 140.5)     | 105.6 (104.1, 107.0) | 129.4 (128.0, 130.8) | 157.9 (156.4, 159.4) | 163.9 (162.0, 165.7) | 142.7 (141.5, 144.0)     | 108.2 (105.6, 110.7) | 133.1 (131.6, 134.5) | 162.0 (160.9, 163.1) | 167.3 (166.1, 168.6) |
| urban-rural difference | 3.2 (2.5, 3.9)           | 3.2 (2.4, 4.1)       | 3.2 (2.5, 4.0)       | 3.2 (2.4, 4.0)       | 3.2 (2.3, 4.0)       | 2.7 (2.0, 3.3)           | 2.7 (1.9, 3.5)       | 2.7 (2.0, 3.4)       | 2.6 (2.0, 3.3)       | 2.6 (1.8, 3.4)       |
| Lao PDR                |                          |                      |                      |                      |                      |                          |                      |                      |                      |                      |
| rural                  | 135.9 (131.6, 140.5)     | 100.5 (91.6, 109.8)  | 126.6 (122.0, 131.3) | 155.3 (150.8, 160.1) | 160.2 (154.4, 166.1) | 140.2 (135.6, 144.9)     | 106.2 (96.1, 116.6)  | 131.6 (126.2, 136.9) | 159.0 (155.0, 163.0) | 162.4 (159.4, 165.5) |
| urban                  | 138.5 (134.2, 142.9)     | 103.4 (94.6, 112.5)  | 129.2 (124.7, 133.9) | 157.8 (153.2, 162.4) | 162.6 (156.8, 168.5) | 142.1 (137.4, 146.9)     | 108.4 (98.3, 118.8)  | 133.6 (128.2, 139.0) | 160.8 (156.9, 164.9) | 164.2 (160.9, 167.3) |
| urban-rural difference | 2.6 (0.7, 4.5)           | 2.9 (0.7, 4.9)       | 2.7 (0.8, 4.6)       | 2.5 (0.7, 4.4)       | 2.4 (0.3, 4.5)       | 1.9 (0.1, 3.7)           | 2.2 (-0.1, 4.4)      | 2.0 (0.1, 3.9)       | 1.8 (0.0, 3.6)       | 1.7 (-0.1, 3.5)      |
| Malaysia               |                          |                      |                      |                      |                      |                          |                      |                      |                      |                      |
| rural                  | 141.7 (140.3, 143.1)     | 105.8 (103.7, 107.8) | 132.9 (131.2, 134.4) | 161.2 (159.6, 162.8) | 165.0 (163.1, 166.8) | 144.8 (143.6, 146.0)     | 108.7 (106.9, 110.6) | 136.2 (134.9, 137.5) | 164.4 (163.1, 165.6) | 167.6 (166.4, 168.9) |
| urban                  | 144.4 (143.0, 145.8)     | 108.6 (106.5, 110.6) | 135.6 (134.1, 137.2) | 163.9 (162.3, 165.5) | 167.6 (165.8, 169.5) | 146.7 (145.5, 147.9)     | 110.7 (108.8, 112.6) | 138.1 (136.8, 139.4) | 166.2 (165.0, 167.4) | 169.5 (168.2, 170.7) |
| urban-rural difference | 2.7 (1.8, 3.6)           | 2.8 (1.7, 3.9)       | 2.7 (1.8, 3.7)       | 2.7 (1.8, 3.6)       | 2.7 (1.7, 3.6)       | 1.9 (1.2, 2.5)           | 2.0 (1.1, 2.8)       | 1.9 (1.2, 2.6)       | 1.9 (1.2, 2.5)       | 1.8 (1.1, 2.6)       |
| Maldives               |                          |                      |                      |                      |                      |                          |                      |                      |                      |                      |
| rural                  | 141.0 (137.6, 144.4)     | 108.0 (99.6, 116.5)  | 132.6 (129.2, 136.0) | 159.4 (156.1, 162.8) | 162.2 (157.8, 166.5) | 145.5 (142.1, 148.9)     | 110.5 (101.1, 120.0) | 136.8 (133.0, 140.9) | 164.8 (162.8, 166.7) | 168.0 (166.1, 169.9) |
| urban                  | 143.4 (140.1, 146.7)     | 110.8 (102.3, 119.2) | 135.1 (131.7, 138.5) | 161.7 (158.5, 164.8) | 164.3 (160.1, 168.4) | 147.3 (143.8, 150.8)     | 112.6 (102.9, 122.3) | 138.7 (134.8, 142.7) | 166.4 (164.3, 168.4) | 169.5 (167.6, 171.4) |
| urban-rural difference | 2.4 (0.8, 4.1)           | 2.7 (0.7, 4.7)       | 2.5 (0.8, 4.2)       | 2.3 (0.6, 3.9)       | 2.1 (0.3, 3.9)       | 1.8 (0.3, 3.2)           | 2.1 (0.0, 4.1)       | 1.8 (0.2, 3.5)       | 1.6 (0.3, 3.0)       | 1.5 (0.2, 2.8)       |
| Myanmar                |                          |                      |                      |                      |                      |                          |                      |                      |                      |                      |
| rural                  | 137.4 (133.7, 141.2)     | 102.5 (94.0, 111.1)  | 127.8 (123.8, 131.6) | 156.6 (152.8, 160.3) | 162.9 (158.1, 167.6) | 141.5 (137.1, 145.8)     | 106.9 (96.7, 117.0)  | 132.1 (127.1, 137.1) | 160.4 (157.3, 163.4) | 165.9 (163.3, 168.5) |
| urban                  | 139.5 (135.7, 143.2)     | 105.0 (96.4, 113.6)  | 130.0 (126.0, 133.8) | 158.5 (154.7, 162.1) | 164.5 (159.9, 169.2) | 143.0 (138.6, 147.3)     | 108.8 (98.7, 119.0)  | 133.8 (128.7, 138.8) | 161.7 (158.5, 164.8) | 167.1 (164.4, 169.7) |
| urban-rural difference | 2.1 (0.6, 3.6)           | 2.5 (0.6, 4.4)       | 2.2 (0.6, 3.8)       | 1.9 (0.4, 3.3)       | 1.6 (0.0, 3.3)       | 1.5 (0.0, 3.2)           | 1.9 (-0.2, 4.1)      | 1.7 (-0.1, 3.4)      | 1.4 (0.0, 2.8)       | 1.1 (-0.3, 2.5)      |
| Philippines            |                          |                      |                      |                      |                      |                          |                      |                      |                      |                      |
| rural                  | 136.3 (134.6, 138.1)     | 101.5 (99.7, 103.3)  | 126.6 (124.9, 128.3) | 155.6 (153.4, 157.8) | 161.7 (158.6, 165.0) | 139.7 (138.4, 141.0)     | 104.8 (102.3, 107.3) | 130.2 (128.8, 131.6) | 159.0 (157.8, 160.2) | 164.6 (163.3, 166.0) |
| urban                  | 138.8 (137.1, 140.6)     | 104.3 (102.5, 106.2) | 129.1 (127.5, 130.8) | 157.9 (155.7, 160.0) | 163.8 (160.6, 167.1) | 141.8 (140.5, 143.1)     | 107.2 (104.7, 109.7) | 132.3 (130.9, 133.8) | 160.8 (159.6, 162.1) | 166.3 (164.8, 167.7) |
| urban-rural difference | 2.5 (1.4, 3.5)           | 2.8 (1.7, 4.0)       | 2.6 (1.5, 3.6)       | 2.3 (1.2, 3.3)       | 2.1 (0.9, 3.2)       | 2.0 (1.3, 2.8)           | 2.4 (1.5, 3.3)       | 2.1 (1.4, 2.9)       | 1.9 (1.1, 2.6)       | 1.6 (0.8, 2.5)       |
| Thailand               |                          |                      |                      |                      |                      |                          |                      |                      |                      |                      |
| rural                  | 140.9 (139.7, 142.2)     | 105.6 (104.0, 107.1) | 131.5 (130.2, 132.8) | 160.5 (159.2, 162.0) | 165.1 (163.5, 166.7) | 147.4 (146.0, 148.9)     | 111.6 (108.5, 114.8) | 138.4 (136.7, 140.1) | 167.1 (165.9, 168.3) | 170.7 (169.3, 172.0) |
| urban                  | 143.6 (142.3, 144.9)     | 108.6 (107.0, 110.1) | 134.2 (132.9, 135.6) | 163.1 (161.7, 164.6) | 167.5 (165.8, 169.1) | 149.2 (147.8, 150.7)     | 113.8 (110.7, 116.9) | 140.3 (138.6, 142.0) | 168.8 (167.6, 170.0) | 172.2 (170.9, 173.6) |
| urban-rural difference | 2.7 (1.9, 3.4)           | 3.0 (2.0, 3.9)       | 2.8 (2.0, 3.6)       | 2.5 (1.7, 3.3)       | 2.4 (1.4, 3.3)       | 1.8 (0.9, 2.8)           | 2.1 (0.9, 3.4)       | 1.9 (0.9, 2.9)       | 1.7 (0.8, 2.6)       | 1.5 (0.6, 2.5)       |
| Timor-Leste            |                          |                      |                      |                      |                      |                          |                      |                      |                      |                      |
| rural                  | 133.3 (130.0, 136.7)     | 99.7 (95.6, 104.0)   | 123.5 (120.3, 126.9) | 152.0 (147.7, 156.3) | 158.6 (152.7, 164.6) | 136.4 (134.5, 138.2)     | 104.0 (101.2, 106.8) | 127.1 (125.0, 129.2) | 154.4 (152.6, 156.2) | 160.0 (158.1, 162.0) |
| urban                  | 136.5 (133.1, 140.1)     | 103.1 (98.7, 107.6)  | 126.8 (123.5, 130.3) | 155.1 (150.8, 159.5) | 161.6 (155.7, 167.6) | 139.0 (136.9, 141.2)     | 106.8 (103.5, 110.1) | 129.8 (127.3, 132.3) | 157.0 (155.0, 159.0) | 162.5 (160.3, 164.6) |
| urban-rural difference | 3.2 (1.6, 4.8)           | 3.4 (1.5, 5.3)       | 3.3 (1.6, 4.9)       | 3.1 (1.5, 4.7)       | 3.0 (1.2, 4.8)       | 2.6 (1.3, 4.1)           | 2.9 (0.8, 4.9)       | 2.7 (1.2, 4.3)       | 2.5 (1.3, 3.9)       | 2.4 (1.2, 3.8)       |
| Viet Nam               |                          |                      |                      |                      |                      |                          |                      |                      |                      |                      |
| rural                  | 135.9 (134.8, 137.1)     | 101.9 (100.5, 103.3) | 126.0 (124.8, 127.3) | 154.4 (153.1, 155.7) | 162.3 (160.6, 164.0) | 143.2 (141.5, 144.9)     | 108.5 (104.7, 112.3) | 133.8 (131.7, 136.0) | 161.8 (160.5, 163.1) | 168.5 (167.1, 169.9) |

| Boys                                          | Mean height in 1990 (cm) |                      |                      |                      |                      | Mean height in 2020 (cm) |                      |                      |                      |                      |
|-----------------------------------------------|--------------------------|----------------------|----------------------|----------------------|----------------------|--------------------------|----------------------|----------------------|----------------------|----------------------|
|                                               | Age-standardised         | 5 years              | 10 years             | 15 years             | 19 years             | Age-standardised         | 5 years              | 10 years             | 15 years             | 19 years             |
| urban                                         | 139.2 (138.1, 140.4)     | 106.0 (104.6, 107.3) | 129.6 (128.3, 130.8) | 157.4 (156.1, 158.7) | 164.9 (163.2, 166.6) | 145.7 (144.0, 147.5)     | 111.8 (108.0, 115.6) | 136.6 (134.5, 138.7) | 164.0 (162.7, 165.3) | 170.3 (168.9, 171.7) |
| urban-rural difference                        | 3.3 (2.6, 4.0)           | 4.0 (3.2, 4.9)       | 3.5 (2.8, 4.2)       | 3.0 (2.3, 3.7)       | 2.5 (1.7, 3.3)       | 2.5 (1.7, 3.4)           | 3.3 (2.3, 4.3)       | 2.7 (1.9, 3.6)       | 2.2 (1.4, 3.0)       | 1.8 (0.9, 2.6)       |
| <b>High-income Asia Pacific</b>               |                          |                      |                      |                      |                      |                          |                      |                      |                      |                      |
| Japan                                         |                          |                      |                      |                      |                      |                          |                      |                      |                      |                      |
| rural                                         | 146.8 (146.4, 147.2)     | 109.5 (109.0, 110.0) | 138.1 (137.6, 138.5) | 166.9 (166.4, 167.4) | 170.1 (169.5, 170.6) | 147.7 (147.2, 148.2)     | 110.0 (109.2, 110.8) | 138.7 (138.2, 139.3) | 168.1 (167.6, 168.6) | 171.6 (171.0, 172.2) |
| urban                                         | 147.0 (146.7, 147.4)     | 109.6 (109.1, 110.1) | 138.3 (137.8, 138.7) | 167.2 (166.8, 167.7) | 170.5 (170.0, 171.0) | 148.0 (147.5, 148.5)     | 110.1 (109.3, 111.0) | 139.0 (138.4, 139.5) | 168.5 (168.0, 169.0) | 172.1 (171.5, 172.7) |
| urban-rural difference                        | 0.2 (0.0, 0.5)           | 0.1 (-0.2, 0.4)      | 0.2 (-0.1, 0.4)      | 0.3 (0.0, 0.6)       | 0.4 (0.1, 0.8)       | 0.3 (0.0, 0.6)           | 0.1 (-0.3, 0.5)      | 0.2 (-0.1, 0.5)      | 0.4 (0.1, 0.7)       | 0.5 (0.1, 0.9)       |
| Singapore                                     |                          |                      |                      |                      |                      |                          |                      |                      |                      |                      |
| rural                                         | 147.7 (143.0, 152.5)     | 109.6 (99.1, 119.8)  | 138.8 (133.6, 143.9) | 168.2 (163.5, 172.8) | 171.8 (166.5, 177.1) | 149.5 (144.2, 154.5)     | 112.3 (100.8, 123.8) | 140.7 (134.7, 146.4) | 169.5 (165.3, 173.6) | 172.8 (169.7, 175.9) |
| urban                                         | 148.7 (144.3, 153.1)     | 110.7 (100.4, 120.9) | 139.8 (135.0, 144.8) | 169.1 (164.8, 173.3) | 172.7 (167.8, 177.5) | 150.1 (145.2, 154.9)     | 113.1 (101.7, 124.2) | 141.4 (135.7, 146.9) | 170.2 (166.4, 174.0) | 173.4 (171.0, 175.8) |
| urban-rural difference                        | 1.0 (-1.1, 3.1)          | 1.1 (-1.2, 3.3)      | 1.0 (-1.1, 3.1)      | 0.9 (-1.2, 3.1)      | 0.9 (-1.4, 3.3)      | 0.7 (-1.4, 2.7)          | 0.7 (-1.8, 3.2)      | 0.7 (-1.5, 2.8)      | 0.6 (-1.4, 2.6)      | 0.6 (-1.4, 2.6)      |
| South Korea                                   |                          |                      |                      |                      |                      |                          |                      |                      |                      |                      |
| rural                                         | 147.5 (146.5, 148.5)     | 110.1 (108.9, 111.3) | 139.7 (138.6, 140.8) | 167.5 (166.3, 168.6) | 168.6 (167.1, 170.1) | 151.6 (151.0, 152.3)     | 112.6 (111.5, 113.8) | 142.9 (142.2, 143.7) | 172.4 (171.7, 173.1) | 175.2 (174.5, 176.0) |
| urban                                         | 148.2 (147.2, 149.1)     | 111.0 (110.0, 112.1) | 140.4 (139.4, 141.5) | 168.0 (166.9, 169.2) | 169.0 (167.5, 170.4) | 151.9 (151.3, 152.5)     | 113.2 (112.0, 114.3) | 143.3 (142.6, 144.0) | 172.6 (171.9, 173.2) | 175.3 (174.6, 176.0) |
| urban-rural difference                        | 0.7 (-0.1, 1.5)          | 0.9 (0.0, 1.8)       | 0.8 (0.0, 1.6)       | 0.6 (-0.2, 1.4)      | 0.5 (-0.4, 1.3)      | 0.3 (-0.2, 0.7)          | 0.5 (-0.1, 1.1)      | 0.3 (-0.2, 0.8)      | 0.2 (-0.3, 0.7)      | 0.0 (-0.6, 0.6)      |
| <b>High-income western</b>                    |                          |                      |                      |                      |                      |                          |                      |                      |                      |                      |
| <i>High-income English-speaking countries</i> |                          |                      |                      |                      |                      |                          |                      |                      |                      |                      |
| Australia                                     |                          |                      |                      |                      |                      |                          |                      |                      |                      |                      |
| rural                                         | 151.5 (150.3, 152.7)     | 112.8 (111.3, 114.2) | 142.0 (140.7, 143.3) | 172.7 (171.3, 174.1) | 177.2 (175.2, 179.2) | 154.3 (153.1, 155.5)     | 116.1 (113.3, 119.0) | 144.9 (143.5, 146.4) | 175.2 (174.2, 176.2) | 179.5 (178.5, 180.6) |
| urban                                         | 151.3 (150.2, 152.4)     | 112.7 (111.3, 114.1) | 141.8 (140.7, 143.0) | 172.4 (171.1, 173.7) | 176.8 (174.9, 178.7) | 153.7 (152.5, 154.9)     | 115.7 (112.9, 118.6) | 144.4 (142.9, 145.8) | 174.6 (173.6, 175.5) | 178.8 (177.7, 179.9) |
| urban-rural difference                        | -0.2 (-1.1, 0.7)         | 0.0 (-1.0, 0.9)      | -0.2 (-1.0, 0.7)     | -0.3 (-1.2, 0.7)     | -0.4 (-1.5, 0.8)     | -0.6 (-1.2, 0.0)         | -0.4 (-1.3, 0.4)     | -0.5 (-1.2, 0.1)     | -0.6 (-1.3, 0.0)     | -0.7 (-1.5, 0.0)     |
| Canada                                        |                          |                      |                      |                      |                      |                          |                      |                      |                      |                      |
| rural                                         | 151.1 (149.3, 152.8)     | 111.5 (108.6, 114.2) | 141.9 (139.8, 144.0) | 172.3 (170.3, 174.1) | 176.7 (174.4, 179.0) | 152.9 (151.1, 154.6)     | 113.1 (110.5, 115.7) | 143.6 (141.7, 145.6) | 174.3 (172.6, 176.0) | 178.8 (177.0, 180.7) |
| urban                                         | 151.5 (150.1, 152.9)     | 112.1 (109.6, 114.6) | 142.4 (140.7, 144.2) | 172.6 (171.0, 174.2) | 177.0 (174.9, 179.0) | 153.3 (152.1, 154.5)     | 113.7 (111.8, 115.7) | 144.0 (142.7, 145.4) | 174.6 (173.3, 175.8) | 178.9 (177.5, 180.4) |
| urban-rural difference                        | 0.5 (-1.1, 2.0)          | 0.7 (-1.2, 2.6)      | 0.5 (-1.0, 2.1)      | 0.4 (-1.2, 1.9)      | 0.2 (-1.5, 1.9)      | 0.3 (-1.3, 2.0)          | 0.6 (-1.7, 2.8)      | 0.4 (-1.4, 2.2)      | 0.3 (-1.3, 1.9)      | 0.1 (-1.4, 1.7)      |
| Ireland                                       |                          |                      |                      |                      |                      |                          |                      |                      |                      |                      |
| rural                                         | 151.6 (149.6, 153.6)     | 113.3 (111.3, 115.4) | 142.1 (140.1, 144.1) | 172.5 (169.9, 175.1) | 177.8 (174.4, 181.3) | 152.8 (151.9, 153.8)     | 114.7 (113.0, 116.5) | 143.3 (142.2, 144.5) | 173.6 (172.5, 174.8) | 178.8 (177.3, 180.4) |
| urban                                         | 151.4 (149.5, 153.4)     | 113.3 (111.2, 115.3) | 141.9 (139.9, 143.9) | 172.2 (169.7, 174.8) | 177.4 (174.1, 180.9) | 152.5 (151.6, 153.4)     | 114.5 (112.8, 116.3) | 143.0 (141.9, 144.1) | 173.2 (172.1, 174.4) | 178.3 (176.8, 179.9) |
| urban-rural difference                        | -0.2 (-1.4, 0.9)         | -0.1 (-1.2, 1.1)     | -0.2 (-1.3, 0.9)     | -0.3 (-1.6, 0.9)     | -0.4 (-1.9, 1.0)     | -0.3 (-1.0, 0.3)         | -0.2 (-1.0, 0.7)     | -0.3 (-0.9, 0.4)     | -0.4 (-1.1, 0.4)     | -0.5 (-1.4, 0.5)     |
| New Zealand                                   |                          |                      |                      |                      |                      |                          |                      |                      |                      |                      |
| rural                                         | 152.4 (151.0, 153.8)     | 113.0 (111.1, 114.8) | 143.0 (141.5, 144.5) | 173.6 (172.1, 175.2) | 178.2 (176.3, 180.2) | 153.1 (152.2, 154.0)     | 113.5 (112.1, 114.8) | 143.9 (142.9, 144.9) | 174.5 (173.6, 175.5) | 178.6 (177.4, 179.7) |
| urban                                         | 152.4 (151.2, 153.7)     | 113.5 (111.7, 115.2) | 143.2 (141.7, 144.6) | 173.5 (172.1, 174.9) | 177.9 (176.1, 179.7) | 152.9 (152.1, 153.7)     | 113.7 (112.5, 114.9) | 143.8 (142.9, 144.7) | 174.2 (173.3, 175.0) | 177.9 (176.9, 179.0) |
| urban-rural difference                        | 0.1 (-0.9, 1.0)          | 0.5 (-0.6, 1.6)      | 0.2 (-0.8, 1.2)      | -0.1 (-1.1, 0.9)     | -0.3 (-1.4, 0.7)     | -0.2 (-0.8, 0.4)         | 0.2 (-0.6, 1.0)      | -0.1 (-0.7, 0.5)     | -0.4 (-1.0, 0.2)     | -0.6 (-1.3, 0.1)     |
| United Kingdom                                |                          |                      |                      |                      |                      |                          |                      |                      |                      |                      |
| rural                                         | 150.9 (150.2, 151.5)     | 111.9 (111.1, 112.7) | 141.5 (140.7, 142.3) | 171.6 (170.9, 172.4) | 177.4 (176.5, 178.4) | 151.8 (151.2, 152.5)     | 111.8 (110.5, 113.0) | 142.3 (141.6, 143.0) | 173.1 (172.5, 173.8) | 179.1 (178.4, 179.8) |
| urban                                         | 150.5 (149.8, 151.1)     | 111.8 (111.1, 112.6) | 141.2 (140.4, 141.9) | 171.1 (170.3, 171.8) | 176.7 (175.8, 177.6) | 151.3 (150.7, 151.8)     | 111.6 (110.4, 112.8) | 141.8 (141.1, 142.4) | 172.4 (171.8, 173.0) | 178.1 (177.4, 178.8) |
| urban-rural difference                        | -0.4 (-0.9, 0.1)         | 0.0 (-0.6, 0.5)      | -0.3 (-0.8, 0.2)     | -0.6 (-1.0, -0.1)    | -0.8 (-1.3, -0.3)    | -0.6 (-1.0, -0.2)        | -0.2 (-0.7, 0.2)     | -0.5 (-0.9, -0.1)    | -0.8 (-1.2, -0.3)    | -1.0 (-1.5, -0.4)    |
| United States of America                      |                          |                      |                      |                      |                      |                          |                      |                      |                      |                      |
| rural                                         | 151.7 (150.8, 152.5)     | 113.9 (112.9, 114.8) | 142.5 (141.6, 143.4) | 172.6 (171.7, 173.6) | 176.0 (174.8, 177.2) | 151.8 (150.9, 152.6)     | 113.6 (111.9, 115.4) | 142.7 (141.7, 143.6) | 172.9 (172.0, 173.7) | 175.9 (174.9, 177.0) |
| urban                                         | 151.8 (150.9, 152.7)     | 114.3 (113.3, 115.3) | 142.7 (141.7, 143.6) | 172.7 (171.6, 173.7) | 175.9 (174.6, 177.2) | 151.7 (150.9, 152.5)     | 113.8 (112.1, 115.5) | 142.7 (141.8, 143.6) | 172.7 (171.9, 173.5) | 175.6 (174.7, 176.5) |
| urban-rural difference                        | 0.2 (-0.5, 0.8)          | 0.4 (-0.4, 1.1)      | 0.2 (-0.4, 0.9)      | 0.0 (-0.7, 0.8)      | -0.1 (-1.0, 0.9)     | -0.1 (-0.7, 0.5)         | 0.1 (-0.5, 0.8)      | 0.0 (-0.6, 0.6)      | -0.2 (-0.9, 0.5)     | -0.3 (-1.2, 0.5)     |
| <i>Northwestern Europe</i>                    |                          |                      |                      |                      |                      |                          |                      |                      |                      |                      |
| Austria                                       |                          |                      |                      |                      |                      |                          |                      |                      |                      |                      |
| rural                                         | 153.8 (152.6, 155.1)     | 117.1 (115.0, 119.1) | 145.2 (143.7, 146.7) | 173.7 (172.4, 174.9) | 177.3 (175.7, 178.9) | 153.9 (152.8, 155.1)     | 116.2 (113.8, 118.6) | 144.9 (143.6, 146.3) | 174.3 (173.1, 175.5) | 178.6 (177.4, 179.9) |
| urban                                         | 153.9 (152.8, 154.9)     | 117.1 (115.1, 119.0) | 145.2 (143.9, 146.6) | 173.7 (172.6, 174.8) | 177.3 (176.0, 178.7) | 153.7 (152.6, 154.8)     | 115.9 (113.5, 118.4) | 144.7 (143.4, 146.0) | 174.0 (172.8, 175.1) | 178.3 (177.2, 179.5) |
| urban-rural difference                        | 0.0 (-1.3, 1.4)          | 0.0 (-1.3, 1.4)      | 0.0 (-1.2, 1.4)      | 0.0 (-1.3, 1.5)      | 0.0 (-1.5, 1.7)      | -0.3 (-1.2, 0.6)         | -0.3 (-1.4, 0.8)     | -0.3 (-1.2, 0.6)     | -0.3 (-1.2, 0.6)     | -0.3 (-1.3, 0.7)     |
| Belgium                                       |                          |                      |                      |                      |                      |                          |                      |                      |                      |                      |
| rural                                         | 152.8 (150.8, 154.8)     | 115.9 (113.1, 118.7) | 144.1 (142.0, 146.3) | 172.5 (170.3, 174.9) | 176.4 (174.0, 178.9) | 153.1 (150.8, 155.3)     | 114.4 (110.6, 118.0) | 143.5 (140.9, 146.1) | 173.8 (171.7, 176.0) | 179.5 (177.3, 181.7) |
| urban                                         | 152.4 (150.1, 154.6)     | 115.7 (112.9, 118.4) | 143.8 (141.4, 146.2) | 172.1 (169.4, 174.8) | 175.9 (173.0, 178.8) | 152.6 (150.8, 154.3)     | 114.0 (110.9, 117.1) | 143.0 (140.8, 145.1) | 173.3 (171.5, 175.0) | 178.9 (177.1, 180.6) |
| urban-rural difference                        | -0.4 (-2.1, 1.3)         | -0.2 (-2.1, 1.7)     | -0.3 (-2.0, 1.4)     | -0.4 (-2.2, 1.3)     | -0.5 (-2.5, 1.5)     | -0.5 (-2.2, 1.1)         | -0.4 (-2.6, 1.7)     | -0.5 (-2.3, 1.2)     | -0.6 (-2.2, 1.0)     | -0.7 (-2.3, 0.9)     |
| Denmark                                       |                          |                      |                      |                      |                      |                          |                      |                      |                      |                      |



| Boys                       | Mean height in 1990 (cm) |                      |                      |                      |                      | Mean height in 2020 (cm) |                      |                      |                      |                      |
|----------------------------|--------------------------|----------------------|----------------------|----------------------|----------------------|--------------------------|----------------------|----------------------|----------------------|----------------------|
|                            | Age-standardised         | 5 years              | 10 years             | 15 years             | 19 years             | Age-standardised         | 5 years              | 10 years             | 15 years             | 19 years             |
| rural                      | 152.4 (151.2, 153.7)     | 115.6 (114.1, 117.2) | 142.6 (141.3, 143.9) | 172.6 (171.2, 174.0) | 178.8 (177.1, 180.4) | 154.9 (153.8, 156.0)     | 117.2 (114.8, 119.6) | 144.7 (143.3, 146.1) | 175.5 (174.5, 176.6) | 182.3 (181.3, 183.3) |
| urban                      | 152.6 (151.8, 153.3)     | 116.0 (115.1, 117.0) | 142.8 (141.9, 143.7) | 172.6 (171.6, 173.5) | 178.6 (177.3, 179.9) | 155.1 (154.1, 156.2)     | 117.7 (115.4, 120.1) | 145.0 (143.6, 146.3) | 175.6 (174.6, 176.6) | 182.2 (181.3, 183.1) |
| urban-rural difference     | 0.1 (-1.0, 1.1)          | 0.4 (-0.9, 1.7)      | 0.2 (-0.9, 1.3)      | 0.0 (-1.1, 1.0)      | -0.2 (-1.3, 0.8)     | 0.2 (-0.5, 1.0)          | 0.5 (-0.6, 1.7)      | 0.3 (-0.5, 1.2)      | 0.1 (-0.5, 0.8)      | -0.1 (-0.7, 0.6)     |
| <b>Finland</b>             |                          |                      |                      |                      |                      |                          |                      |                      |                      |                      |
| rural                      | 152.4 (151.3, 153.4)     | 113.5 (111.4, 115.5) | 143.4 (142.0, 144.8) | 173.0 (171.7, 174.3) | 177.5 (176.0, 179.0) | 153.0 (151.6, 154.4)     | 112.6 (110.7, 114.5) | 143.5 (142.0, 145.0) | 174.3 (172.9, 175.7) | 179.9 (178.4, 181.6) |
| urban                      | 153.1 (152.1, 154.2)     | 114.1 (112.0, 116.1) | 144.1 (142.7, 145.4) | 173.8 (172.6, 175.1) | 178.4 (177.0, 179.8) | 153.3 (152.1, 154.5)     | 112.8 (111.0, 114.5) | 143.8 (142.5, 145.1) | 174.7 (173.4, 175.9) | 180.4 (178.9, 181.9) |
| urban-rural difference     | 0.7 (-0.1, 1.6)          | 0.6 (-0.4, 1.6)      | 0.7 (-0.1, 1.5)      | 0.8 (-0.1, 1.7)      | 0.9 (-0.1, 1.9)      | 0.3 (-0.7, 1.3)          | 0.2 (-1.1, 1.4)      | 0.3 (-0.8, 1.3)      | 0.4 (-0.6, 1.4)      | 0.5 (-0.6, 1.5)      |
| <b>Germany</b>             |                          |                      |                      |                      |                      |                          |                      |                      |                      |                      |
| rural                      | 153.3 (151.7, 154.8)     | 114.0 (111.6, 116.4) | 143.7 (141.8, 145.6) | 174.4 (172.6, 176.1) | 179.6 (178.0, 181.3) | 154.0 (152.3, 155.7)     | 114.7 (112.0, 117.4) | 144.4 (142.5, 146.2) | 175.1 (173.3, 176.9) | 180.4 (178.7, 182.3) |
| urban                      | 153.4 (151.9, 154.9)     | 114.4 (112.1, 116.8) | 143.9 (142.0, 145.7) | 174.4 (172.8, 176.0) | 179.5 (178.1, 180.9) | 154.1 (152.4, 155.7)     | 115.1 (112.5, 117.7) | 144.5 (142.6, 146.3) | 175.0 (173.3, 176.8) | 180.2 (178.5, 181.8) |
| urban-rural difference     | 0.1 (-0.9, 1.2)          | 0.4 (-0.8, 1.7)      | 0.2 (-0.9, 1.3)      | 0.0 (-1.1, 1.1)      | -0.2 (-1.4, 1.1)     | 0.0 (-0.9, 1.0)          | 0.4 (-0.8, 1.6)      | 0.1 (-0.8, 1.1)      | -0.1 (-1.0, 0.8)     | -0.3 (-1.3, 0.8)     |
| <b>Greenland</b>           |                          |                      |                      |                      |                      |                          |                      |                      |                      |                      |
| rural                      | 147.4 (143.1, 151.8)     | 109.3 (100.5, 118.1) | 138.0 (133.5, 142.6) | 168.0 (163.4, 172.4) | 172.7 (167.2, 178.1) | 148.6 (143.8, 153.4)     | 111.1 (101.2, 121.5) | 139.4 (133.9, 144.8) | 169.0 (164.9, 173.2) | 173.7 (170.4, 177.0) |
| urban                      | 148.0 (143.8, 152.5)     | 109.9 (101.3, 118.9) | 138.6 (134.2, 143.2) | 168.6 (164.3, 173.1) | 173.4 (168.0, 178.9) | 149.0 (144.3, 153.8)     | 111.3 (101.4, 121.9) | 139.7 (134.3, 145.2) | 169.4 (165.4, 173.5) | 174.0 (170.9, 177.3) |
| urban-rural difference     | 0.7 (-1.0, 2.4)          | 0.6 (-1.4, 2.6)      | 0.6 (-1.1, 2.4)      | 0.7 (-1.0, 2.4)      | 0.7 (-1.1, 2.6)      | 0.3 (-1.5, 2.1)          | 0.2 (-2.1, 2.5)      | 0.3 (-1.6, 2.2)      | 0.3 (-1.3, 2.0)      | 0.4 (-1.2, 2.0)      |
| <b>Iceland</b>             |                          |                      |                      |                      |                      |                          |                      |                      |                      |                      |
| rural                      | 154.1 (149.4, 158.8)     | 116.2 (107.2, 125.0) | 144.6 (139.7, 149.4) | 174.6 (169.7, 179.6) | 180.0 (174.0, 186.3) | 154.8 (149.7, 159.8)     | 116.6 (106.3, 126.5) | 145.1 (139.4, 150.8) | 175.5 (170.9, 180.0) | 181.4 (177.1, 185.5) |
| urban                      | 154.4 (149.9, 159.0)     | 116.5 (107.7, 125.3) | 144.9 (140.2, 149.6) | 174.9 (170.2, 179.6) | 180.3 (174.6, 186.2) | 154.9 (149.9, 159.8)     | 116.7 (106.3, 126.5) | 145.2 (139.6, 150.7) | 175.5 (171.1, 179.9) | 181.4 (177.3, 185.3) |
| urban-rural difference     | 0.3 (-1.6, 2.3)          | 0.4 (-1.8, 2.5)      | 0.3 (-1.6, 2.3)      | 0.3 (-1.6, 2.3)      | 0.3 (-1.8, 2.5)      | 0.1 (-1.9, 2.0)          | 0.1 (-2.3, 2.4)      | 0.1 (-2.0, 2.0)      | 0.1 (-1.8, 1.8)      | 0.1 (-1.8, 1.9)      |
| <b>Luxembourg</b>          |                          |                      |                      |                      |                      |                          |                      |                      |                      |                      |
| rural                      | 151.9 (147.6, 156.1)     | 113.4 (104.7, 122.0) | 142.2 (137.7, 146.6) | 172.5 (168.1, 177.0) | 178.3 (173.1, 183.8) | 152.5 (147.8, 157.1)     | 114.9 (104.8, 125.1) | 143.0 (137.6, 148.2) | 172.9 (169.0, 176.7) | 178.5 (175.7, 181.3) |
| urban                      | 151.6 (147.4, 155.9)     | 113.3 (104.6, 121.8) | 142.0 (137.6, 146.3) | 172.3 (167.9, 176.8) | 178.0 (172.8, 183.4) | 152.0 (147.3, 156.6)     | 114.5 (104.4, 124.6) | 142.5 (137.1, 147.8) | 172.3 (168.4, 176.2) | 177.9 (175.0, 180.7) |
| urban-rural difference     | -0.2 (-1.8, 1.3)         | -0.1 (-2.1, 1.8)     | -0.2 (-1.8, 1.4)     | -0.3 (-1.8, 1.3)     | -0.3 (-2.0, 1.4)     | -0.5 (-2.2, 1.2)         | -0.4 (-2.6, 1.9)     | -0.5 (-2.3, 1.4)     | -0.5 (-2.1, 1.0)     | -0.6 (-2.1, 0.9)     |
| <b>Netherlands</b>         |                          |                      |                      |                      |                      |                          |                      |                      |                      |                      |
| rural                      | 156.1 (153.8, 158.5)     | 119.4 (116.2, 122.7) | 146.4 (143.9, 148.9) | 176.2 (173.3, 179.0) | 181.9 (178.6, 185.2) | 156.6 (154.4, 158.7)     | 119.4 (115.1, 123.7) | 146.5 (143.8, 149.2) | 176.9 (174.9, 179.0) | 183.6 (181.0, 186.1) |
| urban                      | 156.1 (153.9, 158.3)     | 119.3 (116.1, 122.6) | 146.4 (144.0, 148.8) | 176.2 (173.4, 179.0) | 181.9 (178.8, 185.1) | 156.3 (154.2, 158.5)     | 119.1 (114.6, 123.5) | 146.2 (143.5, 149.0) | 176.7 (174.8, 178.7) | 183.4 (181.0, 185.7) |
| urban-rural difference     | 0.0 (-1.3, 1.3)          | -0.1 (-1.5, 1.3)     | -0.1 (-1.3, 1.3)     | 0.0 (-1.4, 1.4)      | 0.0 (-1.6, 1.7)      | -0.2 (-1.4, 0.9)         | -0.3 (-1.8, 1.2)     | -0.3 (-1.5, 1.0)     | -0.2 (-1.3, 1.0)     | -0.2 (-1.5, 1.1)     |
| <b>Norway</b>              |                          |                      |                      |                      |                      |                          |                      |                      |                      |                      |
| rural                      | 154.2 (152.2, 156.2)     | 115.1 (110.9, 119.4) | 144.5 (142.3, 146.7) | 175.3 (173.1, 177.6) | 180.4 (178.0, 182.9) | 154.7 (152.6, 156.7)     | 116.7 (112.2, 121.5) | 145.3 (142.8, 147.7) | 175.3 (173.1, 177.5) | 180.0 (177.5, 182.4) |
| urban                      | 154.6 (152.5, 156.7)     | 115.4 (111.4, 119.7) | 144.9 (142.7, 147.1) | 175.8 (173.4, 178.3) | 181.0 (178.3, 183.7) | 154.8 (153.0, 156.5)     | 116.7 (112.3, 121.3) | 145.3 (143.1, 147.7) | 175.4 (173.4, 177.5) | 180.2 (177.8, 182.7) |
| urban-rural difference     | 0.4 (-0.9, 1.7)          | 0.3 (-1.2, 1.9)      | 0.4 (-0.9, 1.7)      | 0.5 (-0.9, 1.8)      | 0.5 (-1.0, 2.1)      | 0.1 (-1.3, 1.5)          | 0.0 (-1.8, 1.8)      | 0.1 (-1.4, 1.6)      | 0.2 (-1.1, 1.5)      | 0.2 (-1.1, 1.6)      |
| <b>Sweden</b>              |                          |                      |                      |                      |                      |                          |                      |                      |                      |                      |
| rural                      | 153.2 (152.5, 154.0)     | 114.9 (113.1, 116.7) | 143.3 (142.3, 144.4) | 174.4 (173.6, 175.2) | 179.3 (178.2, 180.5) | 154.0 (152.6, 155.5)     | 116.2 (113.4, 119.0) | 144.1 (142.4, 145.8) | 175.0 (173.5, 176.4) | 180.2 (178.6, 181.7) |
| urban                      | 153.1 (152.6, 153.5)     | 114.4 (113.0, 115.7) | 143.1 (142.3, 143.8) | 174.4 (173.7, 175.0) | 179.5 (178.4, 180.6) | 153.6 (152.5, 154.7)     | 115.4 (113.0, 117.8) | 143.6 (142.2, 145.0) | 174.7 (173.4, 175.9) | 180.1 (178.6, 181.5) |
| urban-rural difference     | -0.2 (-0.9, 0.6)         | -0.5 (-1.9, 0.8)     | -0.3 (-1.2, 0.6)     | 0.0 (-0.6, 0.6)      | 0.1 (-0.5, 0.8)      | -0.4 (-1.6, 0.7)         | -0.7 (-2.3, 0.8)     | -0.5 (-1.7, 0.7)     | -0.3 (-1.3, 0.7)     | -0.1 (-1.2, 0.9)     |
| <b>Switzerland</b>         |                          |                      |                      |                      |                      |                          |                      |                      |                      |                      |
| rural                      | 151.0 (149.1, 152.9)     | 113.8 (111.9, 115.7) | 141.7 (139.8, 143.6) | 171.1 (168.7, 173.5) | 176.1 (172.9, 179.5) | 151.7 (150.5, 153.0)     | 113.1 (111.0, 115.4) | 141.9 (140.5, 143.5) | 172.5 (171.2, 173.8) | 178.5 (177.2, 179.7) |
| urban                      | 151.6 (149.8, 153.3)     | 114.3 (112.4, 116.1) | 142.3 (140.5, 144.1) | 171.7 (169.4, 174.0) | 176.8 (173.7, 180.0) | 152.1 (150.9, 153.3)     | 113.4 (111.4, 115.6) | 142.3 (140.9, 143.7) | 172.9 (171.6, 174.2) | 178.9 (177.7, 180.2) |
| urban-rural difference     | 0.6 (-0.5, 1.6)          | 0.5 (-0.6, 1.6)      | 0.6 (-0.5, 1.6)      | 0.6 (-0.5, 1.7)      | 0.6 (-0.6, 1.9)      | 0.4 (-0.3, 1.1)          | 0.3 (-0.6, 1.3)      | 0.4 (-0.3, 1.1)      | 0.4 (-0.2, 1.1)      | 0.5 (-0.2, 1.2)      |
| <b>Southwestern Europe</b> |                          |                      |                      |                      |                      |                          |                      |                      |                      |                      |
| <b>Andorra</b>             |                          |                      |                      |                      |                      |                          |                      |                      |                      |                      |
| rural                      | 149.8 (143.0, 156.7)     | 113.3 (103.2, 123.5) | 140.6 (134.0, 147.6) | 169.9 (163.2, 177.0) | 174.2 (165.8, 182.7) | 151.4 (144.8, 158.2)     | 115.1 (104.0, 126.2) | 142.3 (135.4, 149.3) | 171.5 (165.3, 177.9) | 176.0 (168.9, 183.4) |
| urban                      | 150.5 (143.9, 157.4)     | 113.9 (103.8, 124.1) | 141.3 (134.9, 148.0) | 170.7 (164.0, 177.6) | 175.1 (166.9, 183.5) | 151.4 (144.8, 158.1)     | 114.9 (103.9, 126.1) | 142.2 (135.4, 149.1) | 171.5 (165.2, 177.8) | 176.1 (168.9, 183.4) |
| urban-rural difference     | 0.7 (-1.2, 2.7)          | 0.6 (-1.6, 2.7)      | 0.7 (-1.3, 2.7)      | 0.8 (-1.2, 2.8)      | 0.9 (-1.3, 3.1)      | -0.1 (-2.0, 1.9)         | -0.2 (-2.5, 2.2)     | -0.1 (-2.1, 1.9)     | 0.0 (-1.9, 1.8)      | 0.1 (-1.8, 1.9)      |
| <b>Cyprus</b>              |                          |                      |                      |                      |                      |                          |                      |                      |                      |                      |
| rural                      | 149.4 (146.3, 152.6)     | 113.3 (109.7, 116.8) | 140.4 (137.3, 143.4) | 169.5 (165.5, 173.6) | 173.2 (167.2, 179.2) | 151.2 (149.4, 153.0)     | 116.0 (113.3, 118.8) | 142.3 (140.3, 144.3) | 170.8 (168.7, 173.0) | 174.3 (171.3, 177.6) |
| urban                      | 150.1 (146.9, 153.2)     | 113.8 (110.3, 117.3) | 141.0 (137.9, 144.0) | 170.3 (166.3, 174.3) | 174.0 (168.2, 179.9) | 151.0 (149.4, 152.6)     | 115.7 (113.1, 118.3) | 142.1 (140.3, 143.9) | 170.7 (168.8, 172.7) | 174.3 (171.3, 177.4) |
| urban-rural difference     | 0.7 (-0.8, 2.2)          | 0.6 (-1.0, 2.2)      | 0.7 (-0.9, 2.2)      | 0.7 (-0.9, 2.3)      | 0.8 (-1.1, 2.6)      | -0.2 (-1.3, 1.0)         | -0.3 (-1.8, 1.2)     | -0.2 (-1.4, 1.0)     | -0.1 (-1.3, 1.1)     | 0.0 (-1.4, 1.3)      |
| <b>France</b>              |                          |                      |                      |                      |                      |                          |                      |                      |                      |                      |
| rural                      | 150.1 (147.7, 152.4)     | 112.6 (110.1, 115.1) | 140.9 (138.7, 143.1) | 170.6 (167.4, 173.6) | 174.6 (170.2, 179.0) | 152.1 (150.5, 153.7)     | 114.6 (111.4, 117.9) | 142.9 (141.0, 144.7) | 172.6 (171.0, 174.1) | 177.2 (175.5, 178.8) |
| urban                      | 151.1 (148.8, 153.4)     | 113.0 (110.7, 115.4) | 141.8 (139.7, 143.9) | 172.0 (168.8, 175.0) | 176.4 (171.9, 180.7) | 151.9 (150.4, 153.5)     | 113.8 (110.6, 117.1) | 142.5 (140.7, 144.3) | 172.8 (171.3, 174.2) | 177.7 (176.2, 179.2) |

| Boys                               | Mean height in 1990 (cm) |                      |                      |                      |                      | Mean height in 2020 (cm) |                      |                      |                      |                      |
|------------------------------------|--------------------------|----------------------|----------------------|----------------------|----------------------|--------------------------|----------------------|----------------------|----------------------|----------------------|
|                                    | Age-standardised         | 5 years              | 10 years             | 15 years             | 19 years             | Age-standardised         | 5 years              | 10 years             | 15 years             | 19 years             |
| urban-rural difference             | 1.1 (-0.1, 2.3)          | 0.4 (-1.0, 1.7)      | 0.9 (-0.3, 2.1)      | 1.4 (0.1, 2.7)       | 1.7 (0.3, 3.3)       | -0.2 (-1.1, 0.8)         | -0.8 (-2.1, 0.4)     | -0.4 (-1.4, 0.6)     | 0.1 (-0.8, 1.1)      | 0.5 (-0.6, 1.7)      |
| <b>Greece</b>                      |                          |                      |                      |                      |                      |                          |                      |                      |                      |                      |
| rural                              | 152.4 (150.5, 154.4)     | 115.6 (113.8, 117.5) | 143.0 (141.1, 144.9) | 172.5 (170.0, 175.2) | 178.1 (174.6, 181.6) | 154.4 (153.2, 155.5)     | 118.7 (116.5, 121.0) | 145.1 (143.7, 146.5) | 174.0 (172.7, 175.3) | 179.4 (177.8, 180.9) |
| urban                              | 153.6 (151.6, 155.6)     | 116.4 (114.5, 118.2) | 144.0 (142.2, 145.9) | 173.8 (171.2, 176.5) | 179.7 (176.1, 183.3) | 154.3 (153.2, 155.4)     | 118.2 (116.0, 120.6) | 144.9 (143.5, 146.2) | 174.1 (172.9, 175.4) | 179.8 (178.3, 181.2) |
| urban-rural difference             | 1.2 (0.3, 2.2)           | 0.7 (-0.3, 1.8)      | 1.0 (0.2, 2.0)       | 1.4 (0.4, 2.4)       | 1.6 (0.4, 2.9)       | -0.1 (-0.8, 0.6)         | -0.5 (-1.5, 0.5)     | -0.2 (-1.0, 0.6)     | 0.1 (-0.7, 0.9)      | 0.4 (-0.6, 1.3)      |
| <b>Israel</b>                      |                          |                      |                      |                      |                      |                          |                      |                      |                      |                      |
| rural                              | 150.7 (149.1, 152.4)     | 112.9 (107.8, 118.1) | 141.9 (139.9, 143.9) | 171.5 (170.2, 172.8) | 174.3 (172.7, 175.9) | 150.9 (149.4, 152.5)     | 113.3 (109.5, 117.0) | 142.0 (139.9, 144.1) | 171.7 (170.1, 173.2) | 174.7 (173.4, 176.1) |
| urban                              | 151.0 (149.4, 152.6)     | 113.2 (108.3, 118.2) | 142.2 (140.3, 144.0) | 171.8 (170.5, 173.0) | 174.6 (173.0, 176.1) | 150.6 (149.1, 152.0)     | 112.9 (109.6, 116.4) | 141.6 (139.8, 143.5) | 171.3 (169.8, 172.8) | 174.3 (173.1, 175.6) |
| urban-rural difference             | 0.3 (-0.7, 1.2)          | 0.3 (-1.2, 1.9)      | 0.3 (-0.8, 1.4)      | 0.3 (-0.6, 1.1)      | 0.3 (-0.7, 1.1)      | -0.4 (-1.4, 0.7)         | -0.3 (-2.0, 1.4)     | -0.3 (-1.5, 0.9)     | -0.4 (-1.2, 0.5)     | -0.4 (-1.2, 0.4)     |
| <b>Italy</b>                       |                          |                      |                      |                      |                      |                          |                      |                      |                      |                      |
| rural                              | 149.5 (148.2, 150.9)     | 113.6 (111.7, 115.5) | 140.1 (138.6, 141.5) | 169.5 (168.0, 171.1) | 174.4 (172.6, 176.2) | 151.6 (150.4, 152.9)     | 116.8 (113.8, 119.9) | 142.7 (141.2, 144.1) | 171.0 (169.7, 172.4) | 174.9 (173.2, 176.7) |
| urban                              | 150.6 (149.3, 152.0)     | 114.6 (112.7, 116.6) | 141.2 (139.7, 142.6) | 170.7 (169.2, 172.2) | 175.6 (173.9, 177.3) | 151.9 (150.7, 153.2)     | 117.1 (114.0, 120.1) | 143.0 (141.6, 144.5) | 171.4 (170.1, 172.8) | 175.4 (173.8, 176.9) |
| urban-rural difference             | 1.1 (0.0, 2.3)           | 1.0 (-0.1, 2.2)      | 1.1 (0.0, 2.2)       | 1.2 (-0.1, 2.4)      | 1.2 (-0.3, 2.7)      | 0.3 (-0.5, 1.1)          | 0.3 (-0.7, 1.3)      | 0.3 (-0.5, 1.1)      | 0.4 (-0.5, 1.2)      | 0.4 (-0.7, 1.5)      |
| <b>Malta</b>                       |                          |                      |                      |                      |                      |                          |                      |                      |                      |                      |
| rural                              | 147.7 (144.4, 151.1)     | 112.6 (108.8, 116.3) | 138.2 (134.7, 141.6) | 167.6 (163.2, 172.0) | 172.3 (166.6, 178.2) | 149.7 (147.8, 151.6)     | 113.8 (110.3, 117.4) | 139.9 (137.7, 142.0) | 169.9 (167.1, 172.5) | 175.3 (172.2, 178.3) |
| urban                              | 148.6 (145.3, 151.8)     | 113.2 (109.6, 116.8) | 139.0 (135.7, 142.2) | 168.6 (164.2, 172.9) | 173.4 (167.7, 179.3) | 149.8 (148.0, 151.4)     | 113.7 (110.3, 117.0) | 139.9 (137.9, 141.9) | 170.0 (167.5, 172.4) | 175.6 (172.9, 178.4) |
| urban-rural difference             | 0.9 (-0.8, 2.5)          | 0.6 (-1.1, 2.3)      | 0.8 (-0.8, 2.4)      | 1.0 (-0.8, 2.8)      | 1.1 (-0.9, 3.1)      | 0.1 (-1.3, 1.4)          | -0.2 (-1.8, 1.4)     | 0.0 (-1.4, 1.3)      | 0.2 (-1.2, 1.5)      | 0.3 (-1.2, 1.9)      |
| <b>Portugal</b>                    |                          |                      |                      |                      |                      |                          |                      |                      |                      |                      |
| rural                              | 147.3 (146.2, 148.4)     | 113.1 (111.2, 115.1) | 138.4 (136.9, 139.9) | 166.4 (165.3, 167.5) | 170.8 (169.8, 171.9) | 149.8 (148.7, 151.0)     | 113.9 (111.8, 115.9) | 140.4 (139.0, 141.8) | 169.6 (168.2, 170.9) | 175.4 (173.7, 177.0) |
| urban                              | 148.2 (147.0, 149.3)     | 113.9 (111.9, 115.9) | 139.2 (137.7, 140.7) | 167.2 (166.1, 168.4) | 171.7 (170.7, 172.7) | 149.8 (148.6, 150.9)     | 113.7 (111.7, 115.7) | 140.3 (139.0, 141.7) | 169.5 (168.2, 170.9) | 175.3 (173.7, 177.0) |
| urban-rural difference             | 0.8 (0.2, 1.5)           | 0.8 (-0.2, 1.8)      | 0.8 (0.1, 1.5)       | 0.8 (0.3, 1.4)       | 0.9 (0.3, 1.4)       | -0.1 (-0.8, 0.6)         | -0.1 (-0.9, 0.7)     | -0.1 (-0.8, 0.6)     | -0.1 (-0.8, 0.7)     | 0.0 (-0.9, 0.9)      |
| <b>Spain</b>                       |                          |                      |                      |                      |                      |                          |                      |                      |                      |                      |
| rural                              | 150.7 (149.1, 152.3)     | 114.1 (112.1, 116.3) | 142.2 (140.6, 144.0) | 170.3 (168.4, 172.2) | 174.2 (171.8, 176.7) | 151.6 (150.6, 152.6)     | 115.2 (113.3, 117.1) | 143.0 (141.9, 144.1) | 171.1 (170.0, 172.2) | 175.5 (174.0, 176.9) |
| urban                              | 151.5 (150.0, 153.0)     | 114.7 (112.8, 116.7) | 143.0 (141.3, 144.6) | 171.2 (169.4, 173.0) | 175.2 (172.9, 177.5) | 151.8 (150.8, 152.7)     | 115.2 (113.4, 117.1) | 143.2 (142.1, 144.2) | 171.4 (170.3, 172.5) | 175.9 (174.4, 177.3) |
| urban-rural difference             | 0.8 (-0.2, 1.8)          | 0.6 (-0.6, 1.7)      | 0.7 (-0.3, 1.7)      | 0.9 (-0.1, 1.9)      | 1.0 (-0.1, 2.1)      | 0.2 (-0.4, 0.9)          | 0.0 (-0.9, 0.8)      | 0.1 (-0.5, 0.8)      | 0.3 (-0.4, 1.0)      | 0.4 (-0.4, 1.3)      |
| <b>Latin America and Caribbean</b> |                          |                      |                      |                      |                      |                          |                      |                      |                      |                      |
| <i>Andean Latin America</i>        |                          |                      |                      |                      |                      |                          |                      |                      |                      |                      |
| <b>Bolivia</b>                     |                          |                      |                      |                      |                      |                          |                      |                      |                      |                      |
| rural                              | 140.7 (136.2, 145.2)     | 105.6 (96.9, 114.6)  | 132.5 (128.2, 136.7) | 159.6 (154.6, 164.5) | 163.0 (156.5, 169.6) | 143.5 (139.4, 147.8)     | 108.7 (98.3, 119.6)  | 135.4 (130.6, 140.2) | 162.3 (159.4, 165.2) | 165.5 (163.3, 167.7) |
| urban                              | 144.1 (139.6, 148.5)     | 109.2 (100.5, 118.2) | 135.9 (131.7, 140.1) | 162.8 (157.9, 167.8) | 166.1 (159.7, 172.6) | 146.6 (142.4, 150.7)     | 112.0 (101.6, 122.5) | 138.5 (133.7, 143.3) | 165.3 (162.4, 168.1) | 168.4 (166.2, 170.5) |
| urban-rural difference             | 3.4 (1.6, 5.1)           | 3.6 (1.6, 5.6)       | 3.4 (1.6, 5.2)       | 3.3 (1.4, 5.1)       | 3.1 (1.0, 5.2)       | 3.1 (1.5, 4.7)           | 3.3 (1.1, 5.6)       | 3.1 (1.4, 4.9)       | 3.0 (1.6, 4.4)       | 2.9 (1.5, 4.2)       |
| <b>Ecuador</b>                     |                          |                      |                      |                      |                      |                          |                      |                      |                      |                      |
| rural                              | 139.7 (136.9, 142.7)     | 104.0 (100.7, 107.5) | 131.1 (128.3, 134.0) | 158.8 (155.3, 162.3) | 163.2 (158.4, 168.1) | 142.4 (141.0, 143.8)     | 107.2 (105.2, 109.2) | 133.9 (132.3, 135.6) | 161.2 (159.7, 162.7) | 165.4 (163.9, 167.1) |
| urban                              | 142.7 (139.9, 145.4)     | 106.9 (103.6, 110.2) | 134.1 (131.3, 136.8) | 161.8 (158.4, 165.2) | 166.2 (161.6, 171.0) | 144.9 (143.5, 146.3)     | 109.7 (107.7, 111.7) | 136.4 (134.8, 138.0) | 163.7 (162.3, 165.1) | 167.9 (166.4, 169.5) |
| urban-rural difference             | 3.0 (1.2, 4.6)           | 2.9 (1.2, 4.7)       | 3.0 (1.2, 4.6)       | 3.0 (1.2, 4.7)       | 3.0 (1.1, 4.9)       | 2.5 (1.7, 3.3)           | 2.4 (1.3, 3.6)       | 2.5 (1.6, 3.4)       | 2.5 (1.7, 3.3)       | 2.5 (1.6, 3.4)       |
| <b>Peru</b>                        |                          |                      |                      |                      |                      |                          |                      |                      |                      |                      |
| rural                              | 138.0 (136.1, 140.1)     | 102.7 (100.4, 104.8) | 129.1 (127.2, 131.1) | 157.0 (154.6, 159.5) | 162.4 (158.7, 166.3) | 141.2 (139.6, 142.8)     | 106.9 (103.2, 110.6) | 132.7 (130.5, 134.8) | 159.7 (158.6, 160.7) | 164.3 (163.2, 165.3) |
| urban                              | 142.4 (140.5, 144.2)     | 107.8 (105.6, 109.9) | 133.7 (131.9, 135.4) | 161.0 (158.7, 163.3) | 166.0 (162.4, 169.7) | 145.9 (144.3, 147.5)     | 112.4 (108.7, 116.1) | 137.6 (135.5, 139.7) | 164.0 (163.0, 165.1) | 168.2 (167.2, 169.2) |
| urban-rural difference             | 4.3 (2.9, 5.8)           | 5.1 (3.6, 6.6)       | 4.6 (3.1, 6.0)       | 4.0 (2.5, 5.5)       | 3.6 (2.0, 5.1)       | 4.7 (4.0, 5.5)           | 5.5 (4.4, 6.6)       | 4.9 (4.1, 5.8)       | 4.4 (3.7, 5.0)       | 3.9 (3.3, 4.6)       |
| <b>Caribbean</b>                   |                          |                      |                      |                      |                      |                          |                      |                      |                      |                      |
| <b>Antigua and Barbuda</b>         |                          |                      |                      |                      |                      |                          |                      |                      |                      |                      |
| rural                              | 150.0 (145.0, 154.8)     | 115.3 (105.3, 125.8) | 141.6 (137.1, 146.2) | 168.9 (163.7, 174.2) | 172.5 (165.1, 179.9) | 153.9 (149.0, 159.0)     | 118.6 (106.8, 130.8) | 145.4 (139.9, 151.1) | 173.1 (169.3, 177.0) | 177.0 (172.4, 181.8) |
| urban                              | 152.2 (147.2, 157.2)     | 117.6 (107.6, 128.4) | 143.9 (139.2, 148.7) | 171.1 (165.9, 176.4) | 174.7 (167.1, 182.0) | 155.4 (150.4, 160.6)     | 120.3 (108.6, 132.3) | 147.0 (141.4, 152.6) | 174.6 (170.6, 178.6) | 178.4 (173.7, 183.3) |
| urban-rural difference             | 2.3 (0.2, 4.4)           | 2.4 (0.1, 4.6)       | 2.3 (0.2, 4.4)       | 2.2 (0.0, 4.4)       | 2.2 (-0.3, 4.6)      | 1.5 (-0.7, 3.7)          | 1.6 (-1.2, 4.3)      | 1.5 (-0.7, 3.9)      | 1.5 (-0.6, 3.6)      | 1.4 (-0.6, 3.5)      |
| <b>Bahamas</b>                     |                          |                      |                      |                      |                      |                          |                      |                      |                      |                      |
| rural                              | 146.4 (142.0, 150.9)     | 111.1 (101.5, 120.9) | 138.0 (133.7, 142.4) | 165.6 (160.8, 170.5) | 169.2 (162.8, 175.8) | 150.4 (145.8, 154.8)     | 115.4 (104.0, 126.6) | 142.1 (136.7, 147.1) | 169.4 (166.2, 172.7) | 172.8 (169.7, 176.3) |
| urban                              | 148.7 (144.5, 153.0)     | 113.5 (103.8, 123.2) | 140.3 (136.2, 144.4) | 167.9 (163.3, 172.4) | 171.4 (165.2, 177.7) | 151.9 (147.5, 156.2)     | 117.0 (105.5, 128.3) | 143.6 (138.6, 148.5) | 170.9 (168.0, 173.9) | 174.3 (171.4, 177.3) |
| urban-rural difference             | 2.3 (0.1, 4.4)           | 2.4 (0.1, 4.6)       | 2.3 (0.2, 4.4)       | 2.3 (0.0, 4.4)       | 2.2 (-0.2, 4.6)      | 1.5 (-0.5, 3.6)          | 1.6 (-1.1, 4.3)      | 1.6 (-0.7, 3.8)      | 1.5 (-0.5, 3.5)      | 1.4 (-0.5, 3.4)      |
| <b>Barbados</b>                    |                          |                      |                      |                      |                      |                          |                      |                      |                      |                      |
| rural                              | 149.0 (144.6, 153.5)     | 114.1 (104.0, 124.1) | 140.7 (136.5, 144.9) | 168.1 (163.3, 172.7) | 171.7 (165.1, 178.0) | 153.0 (148.6, 157.6)     | 117.7 (105.9, 129.3) | 144.6 (139.6, 149.8) | 172.2 (169.1, 175.4) | 176.0 (172.8, 179.4) |
| urban                              | 151.7 (147.1, 156.2)     | 116.7 (106.5, 126.8) | 143.3 (139.0, 147.6) | 170.7 (165.9, 175.4) | 174.3 (167.8, 180.9) | 154.9 (150.3, 159.4)     | 119.5 (108.0, 131.3) | 146.4 (141.2, 151.5) | 174.0 (170.7, 177.3) | 177.8 (174.4, 181.2) |

| Boys                                    | Mean height in 1990 (cm) |                      |                      |                      |                      | Mean height in 2020 (cm) |                      |                      |                      |                      |
|-----------------------------------------|--------------------------|----------------------|----------------------|----------------------|----------------------|--------------------------|----------------------|----------------------|----------------------|----------------------|
|                                         | Age-standardised         | 5 years              | 10 years             | 15 years             | 19 years             | Age-standardised         | 5 years              | 10 years             | 15 years             | 19 years             |
| urban-rural difference                  | 2.6 (0.6, 4.7)           | 2.6 (0.5, 4.9)       | 2.6 (0.6, 4.7)       | 2.6 (0.5, 4.8)       | 2.6 (0.2, 5.0)       | 1.8 (-0.3, 4.0)          | 1.8 (-0.8, 4.5)      | 1.8 (-0.4, 4.1)      | 1.8 (-0.1, 3.8)      | 1.8 (-0.1, 3.8)      |
| <b>Belize</b>                           |                          |                      |                      |                      |                      |                          |                      |                      |                      |                      |
| rural                                   | 143.9 (139.8, 148.2)     | 108.5 (98.7, 118.7)  | 135.7 (131.7, 140.0) | 163.2 (158.9, 167.6) | 166.1 (160.5, 171.9) | 148.0 (143.5, 152.6)     | 113.4 (102.0, 125.3) | 140.0 (134.8, 145.2) | 166.9 (163.6, 170.2) | 169.3 (166.4, 172.2) |
| urban                                   | 146.3 (142.0, 150.4)     | 110.9 (101.1, 121.3) | 138.1 (133.9, 142.4) | 165.5 (161.1, 169.9) | 168.4 (162.7, 174.1) | 149.6 (145.0, 154.1)     | 115.0 (103.5, 126.8) | 141.6 (136.5, 146.7) | 168.5 (165.3, 171.7) | 170.8 (168.0, 173.7) |
| urban-rural difference                  | 2.3 (0.2, 4.4)           | 2.4 (0.2, 4.6)       | 2.4 (0.3, 4.4)       | 2.3 (0.1, 4.5)       | 2.3 (-0.2, 4.7)      | 1.6 (-0.5, 3.7)          | 1.7 (-1.0, 4.4)      | 1.6 (-0.6, 3.8)      | 1.6 (-0.5, 3.5)      | 1.5 (-0.5, 3.5)      |
| <b>Bermuda</b>                          |                          |                      |                      |                      |                      |                          |                      |                      |                      |                      |
| rural                                   | 147.5 (140.7, 154.1)     | 112.2 (100.7, 123.6) | 139.0 (132.3, 145.5) | 166.6 (160.0, 173.4) | 170.6 (162.3, 178.9) | 151.4 (144.4, 158.3)     | 116.3 (103.8, 129.0) | 142.9 (135.7, 150.2) | 170.4 (164.1, 176.8) | 174.3 (167.1, 181.4) |
| urban                                   | 149.8 (143.0, 156.5)     | 114.6 (103.0, 126.1) | 141.3 (134.6, 147.9) | 168.9 (162.2, 175.8) | 172.8 (164.6, 181.3) | 152.9 (146.0, 159.8)     | 117.9 (105.2, 130.5) | 144.5 (137.3, 151.7) | 172.0 (165.6, 178.2) | 175.8 (168.7, 182.9) |
| urban-rural difference                  | 2.3 (0.2, 4.5)           | 2.4 (0.2, 4.8)       | 2.3 (0.2, 4.5)       | 2.3 (0.1, 4.5)       | 2.2 (-0.2, 4.7)      | 1.6 (-0.6, 3.7)          | 1.7 (-1.1, 4.4)      | 1.6 (-0.7, 3.8)      | 1.5 (-0.5, 3.5)      | 1.5 (-0.5, 3.5)      |
| <b>Cuba</b>                             |                          |                      |                      |                      |                      |                          |                      |                      |                      |                      |
| rural                                   | 143.9 (140.5, 147.3)     | 108.4 (98.7, 118.5)  | 134.9 (131.4, 138.3) | 163.2 (160.4, 166.1) | 168.3 (164.7, 172.1) | 149.2 (144.7, 153.7)     | 113.6 (102.1, 125.3) | 140.4 (135.4, 145.6) | 168.4 (165.4, 171.5) | 172.9 (170.1, 175.8) |
| urban                                   | 145.6 (142.5, 148.7)     | 110.2 (100.5, 120.3) | 136.6 (133.4, 139.8) | 164.9 (162.5, 167.2) | 169.9 (166.8, 173.1) | 150.2 (145.9, 154.6)     | 114.8 (103.4, 126.5) | 141.6 (136.6, 146.6) | 169.4 (166.6, 172.4) | 173.9 (171.2, 176.7) |
| urban-rural difference                  | 1.7 (0.0, 3.4)           | 1.8 (-0.2, 3.8)      | 1.7 (-0.1, 3.5)      | 1.6 (-0.2, 3.4)      | 1.6 (-0.5, 3.6)      | 1.1 (-0.8, 2.9)          | 1.2 (-1.3, 3.8)      | 1.1 (-0.9, 3.2)      | 1.0 (-0.6, 2.7)      | 1.0 (-0.6, 2.6)      |
| <b>Dominica</b>                         |                          |                      |                      |                      |                      |                          |                      |                      |                      |                      |
| rural                                   | 149.9 (145.6, 154.2)     | 114.7 (104.7, 124.9) | 141.3 (137.1, 145.5) | 169.0 (164.4, 173.5) | 173.4 (167.4, 179.4) | 153.6 (148.8, 158.4)     | 117.7 (106.1, 129.7) | 144.8 (139.3, 150.3) | 173.1 (169.7, 176.5) | 177.9 (174.5, 181.4) |
| urban                                   | 152.3 (148.0, 156.4)     | 117.2 (107.3, 127.1) | 143.7 (139.5, 147.9) | 171.4 (166.9, 175.8) | 175.7 (169.7, 181.5) | 155.2 (150.6, 160.0)     | 119.3 (107.8, 131.3) | 146.4 (141.1, 151.8) | 174.7 (171.3, 178.0) | 179.4 (176.1, 182.8) |
| urban-rural difference                  | 2.4 (0.2, 4.5)           | 2.4 (0.2, 4.7)       | 2.4 (0.3, 4.5)       | 2.3 (0.2, 4.6)       | 2.3 (-0.1, 4.8)      | 1.6 (-0.5, 3.8)          | 1.7 (-1.0, 4.4)      | 1.6 (-0.6, 3.9)      | 1.6 (-0.4, 3.7)      | 1.5 (-0.5, 3.6)      |
| <b>Dominican Republic</b>               |                          |                      |                      |                      |                      |                          |                      |                      |                      |                      |
| rural                                   | 147.1 (143.6, 150.6)     | 111.7 (101.8, 121.3) | 138.9 (135.1, 142.7) | 166.2 (163.3, 169.1) | 169.5 (166.2, 172.8) | 150.0 (145.9, 154.1)     | 114.9 (103.8, 125.8) | 141.5 (136.8, 146.3) | 169.1 (166.4, 171.7) | 172.9 (170.8, 175.1) |
| urban                                   | 149.0 (145.5, 152.3)     | 113.8 (104.0, 123.7) | 140.8 (137.0, 144.6) | 168.0 (165.2, 170.8) | 171.1 (167.9, 174.4) | 151.2 (147.1, 155.4)     | 116.2 (105.2, 127.3) | 142.8 (138.2, 147.7) | 170.2 (167.5, 172.9) | 173.9 (171.8, 176.0) |
| urban-rural difference                  | 1.9 (0.1, 3.5)           | 2.0 (0.0, 4.0)       | 1.9 (0.1, 3.6)       | 1.8 (0.0, 3.4)       | 1.7 (-0.3, 3.5)      | 1.2 (-0.4, 2.8)          | 1.4 (-1.0, 3.9)      | 1.2 (-0.5, 3.1)      | 1.1 (-0.2, 2.5)      | 1.0 (-0.2, 2.2)      |
| <b>Grenada</b>                          |                          |                      |                      |                      |                      |                          |                      |                      |                      |                      |
| rural                                   | 149.9 (145.2, 154.8)     | 114.7 (104.6, 125.6) | 141.3 (136.4, 146.2) | 169.0 (164.1, 174.1) | 173.5 (167.5, 179.6) | 153.6 (148.2, 158.9)     | 118.2 (106.6, 130.2) | 144.9 (138.8, 150.8) | 172.8 (168.4, 177.1) | 177.3 (173.3, 181.4) |
| urban                                   | 152.2 (147.5, 157.1)     | 117.1 (106.9, 127.9) | 143.6 (138.7, 148.5) | 171.3 (166.4, 176.3) | 175.7 (169.5, 181.9) | 155.1 (149.8, 160.5)     | 119.9 (108.3, 131.9) | 146.5 (140.5, 152.3) | 174.3 (169.7, 178.7) | 178.8 (174.8, 182.9) |
| urban-rural difference                  | 2.3 (0.1, 4.4)           | 2.4 (0.1, 4.6)       | 2.3 (0.2, 4.4)       | 2.2 (0.0, 4.5)       | 2.2 (-0.2, 4.7)      | 1.6 (-0.5, 3.7)          | 1.7 (-1.0, 4.4)      | 1.6 (-0.7, 3.9)      | 1.5 (-0.5, 3.5)      | 1.5 (-0.6, 3.5)      |
| <b>Guyana</b>                           |                          |                      |                      |                      |                      |                          |                      |                      |                      |                      |
| rural                                   | 145.2 (141.1, 149.3)     | 110.0 (100.3, 119.8) | 136.6 (132.7, 140.4) | 164.2 (159.8, 168.6) | 168.6 (162.9, 174.3) | 148.9 (144.5, 153.2)     | 114.2 (102.9, 125.8) | 140.4 (135.4, 145.3) | 167.7 (164.8, 170.5) | 171.9 (169.5, 174.1) |
| urban                                   | 148.1 (144.0, 152.3)     | 113.0 (103.1, 122.9) | 139.5 (135.6, 143.4) | 167.2 (162.8, 171.5) | 171.6 (165.9, 177.4) | 151.1 (146.8, 155.3)     | 116.4 (105.0, 128.0) | 142.6 (137.7, 147.6) | 170.0 (167.0, 172.8) | 174.1 (171.7, 176.5) |
| urban-rural difference                  | 3.0 (1.3, 4.6)           | 2.9 (1.0, 4.9)       | 2.9 (1.2, 4.7)       | 3.0 (1.2, 4.6)       | 3.0 (1.0, 4.9)       | 2.2 (0.5, 4.0)           | 2.2 (-0.3, 4.7)      | 2.2 (0.3, 4.2)       | 2.2 (0.7, 3.8)       | 2.2 (0.8, 3.7)       |
| <b>Haiti</b>                            |                          |                      |                      |                      |                      |                          |                      |                      |                      |                      |
| rural                                   | 146.9 (141.6, 152.2)     | 111.6 (101.2, 122.0) | 138.5 (133.1, 143.6) | 166.1 (160.7, 171.7) | 170.0 (163.4, 177.1) | 150.8 (145.2, 156.3)     | 115.7 (103.8, 127.6) | 142.4 (136.2, 148.6) | 169.9 (165.3, 174.5) | 173.6 (169.5, 177.8) |
| urban                                   | 149.1 (143.9, 154.3)     | 113.9 (103.6, 124.3) | 140.7 (135.4, 145.9) | 168.3 (162.9, 173.7) | 172.1 (165.4, 178.9) | 152.3 (146.8, 157.7)     | 117.3 (105.3, 129.3) | 143.9 (137.7, 150.0) | 171.3 (166.8, 175.8) | 175.0 (170.9, 179.0) |
| urban-rural difference                  | 2.2 (0.1, 4.2)           | 2.3 (0.0, 4.5)       | 2.2 (0.2, 4.2)       | 2.1 (0.0, 4.2)       | 2.1 (-0.3, 4.5)      | 1.5 (-0.7, 3.5)          | 1.6 (-1.1, 4.2)      | 1.5 (-0.8, 3.7)      | 1.4 (-0.6, 3.4)      | 1.4 (-0.6, 3.3)      |
| <b>Jamaica</b>                          |                          |                      |                      |                      |                      |                          |                      |                      |                      |                      |
| rural                                   | 149.0 (146.0, 152.1)     | 112.3 (104.3, 120.8) | 140.2 (137.3, 143.1) | 168.7 (165.7, 171.8) | 173.4 (169.5, 177.3) | 152.1 (148.5, 155.9)     | 116.8 (107.1, 126.9) | 143.6 (139.5, 148.1) | 171.1 (168.6, 173.8) | 175.2 (172.9, 177.6) |
| urban                                   | 150.8 (147.9, 153.8)     | 114.2 (106.3, 122.5) | 142.0 (139.0, 144.9) | 170.4 (167.5, 173.5) | 175.1 (171.4, 178.9) | 153.0 (149.3, 156.8)     | 117.9 (108.3, 127.8) | 144.6 (140.3, 149.0) | 172.0 (169.4, 174.8) | 176.1 (173.7, 178.4) |
| urban-rural difference                  | 1.8 (0.2, 3.3)           | 1.9 (0.0, 3.9)       | 1.8 (0.2, 3.4)       | 1.7 (0.2, 3.3)       | 1.7 (-0.1, 3.4)      | 1.0 (-0.8, 2.7)          | 1.1 (-1.4, 3.6)      | 1.0 (-0.9, 2.9)      | 0.9 (-0.6, 2.4)      | 0.8 (-0.6, 2.2)      |
| <b>Puerto Rico</b>                      |                          |                      |                      |                      |                      |                          |                      |                      |                      |                      |
| rural                                   | 147.5 (140.4, 154.2)     | 112.1 (100.6, 123.6) | 139.0 (132.2, 145.6) | 166.7 (159.7, 173.5) | 170.7 (162.2, 179.2) | 151.3 (144.5, 158.1)     | 116.1 (103.5, 128.8) | 142.8 (135.8, 149.9) | 170.4 (164.0, 176.5) | 174.3 (167.3, 181.3) |
| urban                                   | 149.8 (143.0, 156.7)     | 114.5 (102.8, 126.1) | 141.3 (134.4, 148.1) | 169.0 (161.9, 175.9) | 172.9 (164.3, 181.5) | 152.9 (146.1, 159.6)     | 117.8 (105.1, 130.6) | 144.5 (137.3, 151.5) | 172.0 (165.5, 178.3) | 175.8 (168.9, 182.9) |
| urban-rural difference                  | 2.3 (0.2, 4.5)           | 2.4 (0.1, 4.8)       | 2.4 (0.2, 4.5)       | 2.3 (0.1, 4.5)       | 2.2 (-0.3, 4.7)      | 1.6 (-0.6, 3.8)          | 1.7 (-1.1, 4.5)      | 1.6 (-0.7, 3.9)      | 1.6 (-0.5, 3.6)      | 1.5 (-0.5, 3.5)      |
| <b>Saint Kitts and Nevis</b>            |                          |                      |                      |                      |                      |                          |                      |                      |                      |                      |
| rural                                   | 148.3 (144.1, 152.5)     | 114.1 (104.6, 124.6) | 140.3 (136.2, 144.4) | 167.1 (162.6, 171.4) | 169.7 (163.7, 175.7) | 152.9 (148.4, 157.3)     | 118.3 (106.9, 130.0) | 144.8 (139.7, 149.9) | 171.8 (168.7, 174.8) | 174.5 (171.3, 178.1) |
| urban                                   | 150.6 (146.4, 155.0)     | 116.5 (106.9, 126.9) | 142.6 (138.5, 146.9) | 169.4 (164.9, 173.8) | 172.0 (166.0, 178.0) | 154.4 (149.7, 158.9)     | 119.9 (108.4, 131.3) | 146.3 (141.1, 151.4) | 173.3 (170.1, 176.5) | 176.0 (172.6, 179.6) |
| urban-rural difference                  | 2.3 (0.2, 4.4)           | 2.4 (0.0, 4.6)       | 2.3 (0.2, 4.4)       | 2.3 (0.1, 4.5)       | 2.3 (-0.2, 4.7)      | 1.5 (-0.6, 3.7)          | 1.6 (-1.2, 4.3)      | 1.5 (-0.8, 3.8)      | 1.5 (-0.5, 3.6)      | 1.5 (-0.5, 3.5)      |
| <b>Saint Lucia</b>                      |                          |                      |                      |                      |                      |                          |                      |                      |                      |                      |
| rural                                   | 148.7 (144.0, 153.4)     | 113.4 (103.2, 123.8) | 140.2 (135.4, 145.0) | 167.9 (162.8, 172.7) | 172.0 (165.8, 178.1) | 152.4 (147.2, 157.6)     | 117.1 (105.0, 128.9) | 143.9 (138.0, 149.7) | 171.6 (167.2, 176.0) | 175.8 (171.8, 179.7) |
| urban                                   | 151.0 (146.0, 155.9)     | 115.8 (105.5, 126.3) | 142.5 (137.5, 147.4) | 170.1 (164.9, 175.1) | 174.2 (167.8, 180.5) | 154.0 (148.6, 159.3)     | 118.7 (106.5, 130.4) | 145.4 (139.4, 151.4) | 173.1 (168.4, 177.6) | 177.3 (173.3, 181.2) |
| urban-rural difference                  | 2.3 (0.1, 4.4)           | 2.4 (0.0, 4.6)       | 2.3 (0.1, 4.4)       | 2.2 (0.0, 4.4)       | 2.2 (-0.4, 4.7)      | 1.5 (-0.6, 3.7)          | 1.6 (-1.1, 4.4)      | 1.6 (-0.7, 3.9)      | 1.5 (-0.5, 3.5)      | 1.5 (-0.6, 3.5)      |
| <b>Saint Vincent and the Grenadines</b> |                          |                      |                      |                      |                      |                          |                      |                      |                      |                      |
| rural                                   | 150.0 (145.5, 154.6)     | 115.3 (105.2, 125.6) | 141.6 (137.3, 146.1) | 168.9 (164.2, 173.7) | 172.7 (166.1, 179.2) | 153.9 (150.2, 157.8)     | 119.4 (108.3, 130.7) | 145.6 (141.5, 149.9) | 172.8 (170.4, 175.1) | 176.5 (174.0, 179.0) |

| Boys                   | Mean height in 1990 (cm) |                      |                      |                      |                      | Mean height in 2020 (cm) |                      |                      |                      |                      |
|------------------------|--------------------------|----------------------|----------------------|----------------------|----------------------|--------------------------|----------------------|----------------------|----------------------|----------------------|
|                        | Age-standardised         | 5 years              | 10 years             | 15 years             | 19 years             | Age-standardised         | 5 years              | 10 years             | 15 years             | 19 years             |
| urban                  | 152.3 (147.9, 156.9)     | 117.7 (107.9, 128.0) | 144.0 (139.7, 148.3) | 171.2 (166.3, 175.9) | 175.0 (168.4, 181.3) | 155.5 (151.7, 159.3)     | 121.1 (110.0, 132.4) | 147.2 (143.0, 151.5) | 174.3 (172.0, 176.6) | 178.0 (175.6, 180.5) |
| urban-rural difference | 2.3 (0.2, 4.5)           | 2.4 (0.1, 4.7)       | 2.3 (0.3, 4.5)       | 2.3 (0.0, 4.6)       | 2.2 (-0.2, 4.7)      | 1.6 (-0.6, 3.7)          | 1.7 (-1.0, 4.4)      | 1.6 (-0.7, 3.9)      | 1.5 (-0.5, 3.6)      | 1.5 (-0.6, 3.5)      |
| Suriname               |                          |                      |                      |                      |                      |                          |                      |                      |                      |                      |
| rural                  | 146.8 (141.3, 152.4)     | 111.4 (100.8, 122.3) | 138.3 (132.9, 143.9) | 166.0 (160.2, 171.8) | 169.8 (162.6, 177.1) | 150.6 (144.8, 156.3)     | 115.6 (103.5, 127.7) | 142.2 (135.7, 148.5) | 169.6 (164.6, 174.5) | 173.2 (168.6, 177.8) |
| urban                  | 149.1 (143.7, 154.6)     | 113.8 (103.3, 124.5) | 140.6 (135.3, 146.1) | 168.2 (162.6, 173.8) | 172.0 (165.0, 179.1) | 152.1 (146.3, 157.7)     | 117.3 (105.1, 129.3) | 143.8 (137.4, 149.9) | 171.1 (166.4, 175.8) | 174.7 (170.2, 179.0) |
| urban-rural difference | 2.3 (0.2, 4.4)           | 2.4 (0.2, 4.7)       | 2.3 (0.2, 4.4)       | 2.3 (0.0, 4.5)       | 2.2 (-0.2, 4.6)      | 1.6 (-0.5, 3.7)          | 1.7 (-1.0, 4.4)      | 1.6 (-0.7, 3.9)      | 1.5 (-0.4, 3.5)      | 1.5 (-0.5, 3.4)      |
| Trinidad and Tobago    |                          |                      |                      |                      |                      |                          |                      |                      |                      |                      |
| rural                  | 147.9 (145.1, 150.7)     | 111.9 (109.5, 114.4) | 139.3 (136.7, 142.0) | 167.3 (163.8, 171.0) | 171.3 (166.5, 176.2) | 151.7 (147.9, 155.5)     | 115.3 (108.7, 122.0) | 143.0 (138.5, 147.6) | 171.4 (168.2, 174.5) | 175.6 (172.6, 178.8) |
| urban                  | 149.8 (146.9, 152.7)     | 113.9 (111.4, 116.4) | 141.2 (138.5, 143.9) | 169.2 (165.6, 173.0) | 173.1 (168.2, 178.1) | 152.8 (149.0, 156.7)     | 116.5 (109.9, 123.0) | 144.1 (139.6, 148.7) | 172.5 (169.3, 175.7) | 176.7 (173.7, 179.8) |
| urban-rural difference | 1.9 (0.4, 3.3)           | 2.0 (0.6, 3.3)       | 1.9 (0.5, 3.2)       | 1.9 (0.2, 3.5)       | 1.8 (-0.2, 3.8)      | 1.1 (-0.4, 2.7)          | 1.2 (-0.7, 3.2)      | 1.1 (-0.4, 2.8)      | 1.1 (-0.4, 2.6)      | 1.1 (-0.5, 2.7)      |
| Central Latin America  |                          |                      |                      |                      |                      |                          |                      |                      |                      |                      |
| Colombia               |                          |                      |                      |                      |                      |                          |                      |                      |                      |                      |
| rural                  | 140.1 (138.2, 142.0)     | 104.1 (102.1, 106.3) | 130.7 (128.9, 132.6) | 159.5 (157.3, 161.8) | 165.6 (162.3, 169.0) | 144.6 (143.2, 146.2)     | 107.0 (104.4, 109.5) | 135.1 (133.5, 136.8) | 164.9 (163.4, 166.3) | 170.9 (169.4, 172.5) |
| urban                  | 143.3 (141.5, 145.1)     | 107.4 (105.4, 109.5) | 134.0 (132.2, 135.8) | 162.7 (160.6, 164.9) | 168.7 (165.5, 171.9) | 146.5 (145.1, 147.8)     | 108.9 (106.4, 111.3) | 137.0 (135.4, 138.5) | 166.7 (165.3, 168.0) | 172.6 (171.2, 174.1) |
| urban-rural difference | 3.2 (2.1, 4.3)           | 3.3 (2.1, 4.5)       | 3.2 (2.1, 4.3)       | 3.2 (2.0, 4.3)       | 3.1 (1.9, 4.3)       | 1.8 (1.0, 2.7)           | 1.9 (0.9, 3.0)       | 1.9 (1.0, 2.7)       | 1.8 (1.0, 2.6)       | 1.7 (0.8, 2.6)       |
| Costa Rica             |                          |                      |                      |                      |                      |                          |                      |                      |                      |                      |
| rural                  | 144.8 (140.8, 148.9)     | 110.5 (101.7, 119.5) | 136.8 (132.7, 140.7) | 163.5 (159.1, 167.8) | 166.4 (160.6, 172.1) | 147.3 (143.1, 151.4)     | 112.4 (102.2, 123.0) | 139.0 (134.3, 143.7) | 166.2 (163.2, 169.2) | 169.4 (166.7, 172.2) |
| urban                  | 147.5 (143.7, 151.3)     | 113.3 (104.6, 122.1) | 139.5 (135.7, 143.3) | 166.1 (161.9, 170.1) | 168.9 (163.4, 174.3) | 148.5 (144.5, 152.4)     | 113.8 (103.4, 124.2) | 140.3 (135.7, 144.8) | 167.4 (164.7, 170.1) | 170.6 (168.3, 172.9) |
| urban-rural difference | 2.7 (0.6, 4.7)           | 2.8 (0.6, 5.0)       | 2.7 (0.6, 4.7)       | 2.6 (0.5, 4.7)       | 2.6 (0.3, 4.8)       | 1.3 (-0.7, 3.1)          | 1.4 (-1.1, 3.8)      | 1.3 (-0.8, 3.3)      | 1.2 (-0.7, 3.0)      | 1.1 (-0.9, 3.0)      |
| El Salvador            |                          |                      |                      |                      |                      |                          |                      |                      |                      |                      |
| rural                  | 143.0 (138.5, 147.7)     | 107.4 (98.1, 116.6)  | 134.4 (129.6, 139.3) | 162.3 (157.3, 167.0) | 166.4 (160.5, 172.0) | 145.9 (140.9, 150.9)     | 110.9 (100.2, 121.5) | 137.5 (131.8, 143.3) | 164.9 (160.6, 168.9) | 168.5 (165.3, 171.5) |
| urban                  | 146.0 (141.5, 150.6)     | 110.4 (101.0, 119.7) | 137.5 (132.7, 142.2) | 165.3 (160.5, 169.9) | 169.4 (163.6, 174.8) | 147.5 (142.6, 152.5)     | 112.5 (101.7, 123.3) | 139.2 (133.4, 144.8) | 166.5 (162.4, 170.6) | 170.1 (167.1, 173.0) |
| urban-rural difference | 3.0 (1.2, 4.9)           | 3.1 (0.9, 5.1)       | 3.0 (1.2, 4.9)       | 3.0 (1.1, 4.9)       | 3.0 (0.9, 5.0)       | 1.6 (-0.3, 3.5)          | 1.7 (-0.8, 4.1)      | 1.6 (-0.4, 3.6)      | 1.6 (-0.2, 3.3)      | 1.6 (-0.1, 3.2)      |
| Guatemala              |                          |                      |                      |                      |                      |                          |                      |                      |                      |                      |
| rural                  | 137.9 (135.7, 140.2)     | 104.4 (100.3, 108.5) | 129.5 (126.8, 132.0) | 156.4 (153.8, 159.0) | 160.3 (157.0, 163.6) | 140.4 (138.8, 142.0)     | 108.0 (105.6, 110.4) | 132.3 (130.4, 134.2) | 158.3 (156.6, 160.0) | 161.7 (159.6, 163.8) |
| urban                  | 141.2 (138.9, 143.6)     | 107.7 (103.6, 111.9) | 132.8 (130.1, 135.4) | 159.6 (157.0, 162.2) | 163.5 (160.2, 166.9) | 142.4 (140.7, 144.1)     | 110.1 (107.7, 112.6) | 134.4 (132.4, 136.3) | 160.3 (158.5, 162.0) | 163.6 (161.5, 165.7) |
| urban-rural difference | 3.3 (2.0, 4.6)           | 3.3 (1.6, 5.2)       | 3.3 (1.9, 4.8)       | 3.3 (2.0, 4.6)       | 3.2 (1.8, 4.7)       | 2.0 (0.5, 3.6)           | 2.1 (-0.1, 4.3)      | 2.0 (0.4, 3.8)       | 2.0 (0.7, 3.4)       | 2.0 (0.7, 3.2)       |
| Honduras               |                          |                      |                      |                      |                      |                          |                      |                      |                      |                      |
| rural                  | 141.9 (136.9, 146.8)     | 106.5 (96.5, 116.2)  | 133.4 (128.2, 138.5) | 161.1 (156.0, 166.1) | 164.9 (158.7, 170.9) | 145.0 (139.4, 150.4)     | 109.8 (99.0, 120.7)  | 136.6 (130.6, 142.5) | 164.0 (159.1, 169.0) | 167.5 (162.5, 172.6) |
| urban                  | 144.8 (140.1, 149.7)     | 109.5 (99.7, 119.1)  | 136.4 (131.3, 141.5) | 164.0 (159.2, 168.8) | 167.7 (161.8, 173.6) | 146.6 (141.1, 152.0)     | 111.4 (100.6, 122.5) | 138.2 (132.3, 144.2) | 165.6 (160.6, 170.4) | 169.0 (164.0, 174.1) |
| urban-rural difference | 2.9 (0.9, 4.9)           | 3.0 (0.8, 5.2)       | 3.0 (0.9, 4.9)       | 2.9 (0.8, 4.9)       | 2.9 (0.6, 5.1)       | 1.6 (-0.4, 3.6)          | 1.7 (-0.8, 4.1)      | 1.6 (-0.5, 3.7)      | 1.6 (-0.4, 3.5)      | 1.5 (-0.4, 3.5)      |
| Mexico                 |                          |                      |                      |                      |                      |                          |                      |                      |                      |                      |
| rural                  | 141.8 (140.3, 143.3)     | 105.8 (104.2, 107.5) | 133.6 (132.1, 135.1) | 160.9 (159.1, 162.7) | 164.3 (161.6, 166.9) | 145.2 (144.0, 146.3)     | 108.7 (107.0, 110.4) | 137.0 (135.8, 138.3) | 164.6 (163.4, 165.8) | 167.9 (166.6, 169.3) |
| urban                  | 145.6 (144.1, 147.0)     | 109.6 (108.0, 111.2) | 137.4 (135.9, 138.8) | 164.7 (162.9, 166.4) | 168.1 (165.5, 170.7) | 147.3 (146.1, 148.5)     | 110.8 (109.1, 112.5) | 139.1 (137.9, 140.4) | 166.7 (165.5, 167.9) | 170.1 (168.8, 171.5) |
| urban-rural difference | 3.8 (2.9, 4.7)           | 3.7 (2.8, 4.7)       | 3.8 (2.9, 4.7)       | 3.8 (2.9, 4.8)       | 3.8 (2.8, 4.9)       | 2.1 (1.4, 2.8)           | 2.1 (1.2, 2.9)       | 2.1 (1.4, 2.8)       | 2.1 (1.4, 2.8)       | 2.2 (1.4, 2.9)       |
| Nicaragua              |                          |                      |                      |                      |                      |                          |                      |                      |                      |                      |
| rural                  | 141.9 (136.7, 146.9)     | 106.5 (96.7, 116.3)  | 133.4 (128.0, 138.7) | 161.1 (155.9, 166.1) | 164.8 (158.6, 170.8) | 145.0 (139.6, 150.3)     | 109.9 (99.3, 120.5)  | 136.6 (130.7, 142.5) | 164.1 (159.1, 169.0) | 167.5 (162.4, 172.6) |
| urban                  | 144.9 (139.8, 149.6)     | 109.5 (99.8, 119.3)  | 136.4 (131.1, 141.6) | 164.0 (159.0, 168.8) | 167.7 (161.9, 173.5) | 146.6 (141.3, 152.0)     | 111.5 (100.8, 122.1) | 138.3 (132.4, 144.0) | 165.6 (160.8, 170.6) | 169.0 (164.2, 174.0) |
| urban-rural difference | 3.0 (0.9, 5.0)           | 3.0 (0.8, 5.3)       | 3.0 (0.9, 5.0)       | 2.9 (0.8, 5.0)       | 2.9 (0.6, 5.1)       | 1.6 (-0.4, 3.6)          | 1.7 (-0.8, 4.2)      | 1.6 (-0.5, 3.7)      | 1.6 (-0.3, 3.5)      | 1.5 (-0.4, 3.5)      |
| Panama                 |                          |                      |                      |                      |                      |                          |                      |                      |                      |                      |
| rural                  | 141.7 (139.1, 144.3)     | 106.2 (103.1, 109.3) | 133.0 (130.3, 135.6) | 161.0 (158.0, 164.0) | 165.2 (161.3, 168.9) | 144.6 (142.3, 147.0)     | 110.3 (105.3, 115.5) | 136.2 (133.3, 139.2) | 163.4 (161.7, 165.1) | 166.8 (165.0, 168.6) |
| urban                  | 146.7 (144.1, 149.2)     | 111.3 (108.2, 114.4) | 138.0 (135.3, 140.6) | 165.9 (162.9, 169.0) | 170.1 (166.2, 173.8) | 148.0 (145.7, 150.4)     | 113.8 (108.8, 118.9) | 139.6 (136.7, 142.6) | 166.7 (165.0, 168.4) | 170.1 (168.3, 172.0) |
| urban-rural difference | 5.0 (3.7, 6.3)           | 5.1 (3.6, 6.5)       | 5.0 (3.7, 6.3)       | 4.9 (3.6, 6.3)       | 4.9 (3.4, 6.4)       | 3.4 (2.1, 4.6)           | 3.5 (1.8, 5.1)       | 3.4 (2.1, 4.8)       | 3.3 (2.2, 4.5)       | 3.3 (2.1, 4.5)       |
| Venezuela              |                          |                      |                      |                      |                      |                          |                      |                      |                      |                      |
| rural                  | 146.4 (143.0, 150.0)     | 109.2 (102.0, 116.3) | 138.1 (134.5, 141.7) | 166.4 (162.6, 170.3) | 169.3 (164.3, 174.1) | 148.2 (144.6, 151.6)     | 112.8 (104.7, 120.5) | 140.3 (136.3, 144.3) | 167.4 (164.5, 170.2) | 169.3 (166.9, 171.8) |
| urban                  | 147.5 (144.4, 150.7)     | 110.7 (103.9, 117.5) | 139.3 (136.1, 142.6) | 167.3 (163.8, 170.9) | 170.0 (165.4, 174.6) | 147.8 (144.6, 150.9)     | 112.8 (105.1, 120.4) | 140.0 (136.4, 143.7) | 166.8 (164.3, 169.2) | 168.6 (166.6, 170.6) |
| urban-rural difference | 1.1 (-0.9, 3.0)          | 1.5 (-0.8, 3.8)      | 1.2 (-0.9, 3.2)      | 0.9 (-1.1, 2.8)      | 0.7 (-1.4, 2.9)      | -0.4 (-2.3, 1.6)         | 0.1 (-2.5, 2.7)      | -0.2 (-2.3, 1.8)     | -0.5 (-2.4, 1.3)     | -0.7 (-2.6, 1.1)     |
| Southern Latin America |                          |                      |                      |                      |                      |                          |                      |                      |                      |                      |
| Argentina              |                          |                      |                      |                      |                      |                          |                      |                      |                      |                      |
| rural                  | 146.4 (143.2, 149.6)     | 107.7 (103.7, 111.7) | 138.1 (134.7, 141.5) | 166.4 (162.7, 170.3) | 170.5 (165.6, 175.5) | 151.1 (148.4, 153.7)     | 113.8 (109.1, 118.5) | 143.2 (140.0, 146.4) | 170.6 (168.2, 173.0) | 173.7 (171.3, 176.2) |
| urban                  | 149.0 (146.2, 151.9)     | 110.2 (106.5, 114.0) | 140.7 (137.8, 143.7) | 169.2 (165.8, 172.6) | 173.3 (168.8, 177.7) | 151.9 (149.8, 154.0)     | 114.5 (110.4, 118.9) | 144.1 (141.4, 146.7) | 171.5 (169.8, 173.1) | 174.7 (172.9, 176.4) |

| Boys                            | Mean height in 1990 (cm) |                      |                      |                      |                      | Mean height in 2020 (cm) |                      |                      |                      |                      |
|---------------------------------|--------------------------|----------------------|----------------------|----------------------|----------------------|--------------------------|----------------------|----------------------|----------------------|----------------------|
|                                 | Age-standardised         | 5 years              | 10 years             | 15 years             | 19 years             | Age-standardised         | 5 years              | 10 years             | 15 years             | 19 years             |
| urban-rural difference          | 2.7 (0.6, 4.6)           | 2.6 (0.4, 4.7)       | 2.6 (0.6, 4.6)       | 2.7 (0.5, 4.8)       | 2.8 (0.4, 5.0)       | 0.9 (-1.1, 2.7)          | 0.7 (-1.6, 3.1)      | 0.8 (-1.2, 2.8)      | 0.9 (-0.9, 2.7)      | 1.0 (-0.9, 2.8)      |
| <b>Brazil</b>                   |                          |                      |                      |                      |                      |                          |                      |                      |                      |                      |
| rural                           | 145.1 (144.0, 146.2)     | 110.4 (109.2, 111.6) | 136.2 (135.1, 137.3) | 164.0 (162.8, 165.2) | 169.2 (167.9, 170.5) | 151.4 (150.6, 152.3)     | 116.1 (114.4, 117.8) | 142.8 (141.8, 143.7) | 170.7 (169.8, 171.5) | 174.9 (174.0, 175.9) |
| urban                           | 148.2 (147.3, 149.1)     | 112.8 (111.7, 113.9) | 139.0 (138.0, 140.0) | 167.4 (166.3, 168.5) | 173.1 (171.9, 174.3) | 151.8 (151.1, 152.5)     | 115.7 (114.1, 117.3) | 142.9 (142.1, 143.7) | 171.3 (170.6, 172.0) | 176.0 (175.2, 176.8) |
| urban-rural difference          | 3.1 (2.3, 3.9)           | 2.4 (1.5, 3.2)       | 2.9 (2.1, 3.7)       | 3.4 (2.6, 4.2)       | 3.8 (2.9, 4.7)       | 0.3 (-0.3, 1.0)          | -0.4 (-1.2, 0.4)     | 0.1 (-0.5, 0.8)      | 0.7 (0.1, 1.3)       | 1.1 (0.4, 1.8)       |
| <b>Chile</b>                    |                          |                      |                      |                      |                      |                          |                      |                      |                      |                      |
| rural                           | 145.5 (143.3, 147.7)     | 107.3 (103.5, 111.0) | 137.5 (134.9, 140.1) | 165.6 (163.2, 168.0) | 168.1 (165.1, 171.2) | 151.4 (149.0, 153.8)     | 114.1 (109.7, 118.5) | 143.7 (140.6, 146.8) | 171.2 (169.2, 173.3) | 172.9 (171.2, 174.8) |
| urban                           | 147.6 (145.6, 149.6)     | 109.1 (105.4, 112.8) | 139.6 (137.1, 142.0) | 167.9 (165.7, 170.0) | 170.6 (168.0, 173.3) | 151.6 (149.3, 153.9)     | 113.9 (109.6, 118.3) | 143.8 (140.9, 146.8) | 171.6 (169.7, 173.5) | 173.5 (171.8, 175.2) |
| urban-rural difference          | 2.2 (0.7, 3.6)           | 1.8 (0.2, 3.4)       | 2.1 (0.6, 3.5)       | 2.3 (0.8, 3.7)       | 2.5 (0.8, 4.1)       | 0.2 (-1.0, 1.4)          | -0.1 (-1.9, 1.6)     | 0.1 (-1.2, 1.4)      | 0.3 (-0.8, 1.5)      | 0.5 (-0.6, 1.7)      |
| <b>Paraguay</b>                 |                          |                      |                      |                      |                      |                          |                      |                      |                      |                      |
| rural                           | 146.6 (142.6, 150.8)     | 110.7 (102.4, 119.3) | 138.0 (134.1, 142.0) | 165.9 (161.4, 170.3) | 170.5 (164.5, 176.5) | 152.2 (149.0, 155.6)     | 118.6 (109.5, 127.9) | 144.4 (140.7, 148.1) | 170.5 (168.3, 172.7) | 173.4 (170.8, 175.9) |
| urban                           | 149.3 (145.4, 153.3)     | 113.2 (104.8, 121.9) | 140.7 (136.9, 144.6) | 168.7 (164.3, 173.0) | 173.4 (167.4, 179.2) | 153.1 (150.0, 156.4)     | 119.3 (110.2, 128.7) | 145.3 (141.7, 149.0) | 171.5 (169.4, 173.6) | 174.5 (172.0, 177.0) |
| urban-rural difference          | 2.7 (0.9, 4.4)           | 2.5 (0.6, 4.5)       | 2.7 (0.9, 4.4)       | 2.8 (0.9, 4.5)       | 2.9 (0.8, 4.9)       | 0.9 (-0.5, 2.4)          | 0.7 (-1.4, 2.9)      | 0.9 (-0.7, 2.5)      | 1.0 (-0.3, 2.3)      | 1.1 (-0.2, 2.4)      |
| <b>Uruguay</b>                  |                          |                      |                      |                      |                      |                          |                      |                      |                      |                      |
| rural                           | 145.0 (141.7, 148.3)     | 108.0 (104.1, 112.0) | 136.3 (132.9, 139.7) | 164.8 (160.7, 168.8) | 168.9 (163.7, 174.3) | 151.0 (148.3, 153.8)     | 114.7 (109.7, 119.8) | 142.7 (139.5, 146.0) | 170.5 (168.0, 173.0) | 173.7 (170.9, 176.6) |
| urban                           | 147.8 (144.8, 150.6)     | 110.5 (107.3, 113.9) | 139.1 (136.2, 142.0) | 167.7 (163.9, 171.4) | 172.0 (167.0, 176.9) | 152.0 (150.0, 154.1)     | 115.5 (111.1, 120.0) | 143.7 (141.0, 146.3) | 171.7 (170.0, 173.4) | 175.0 (172.9, 177.1) |
| urban-rural difference          | 2.8 (0.7, 5.0)           | 2.6 (0.4, 4.8)       | 2.8 (0.6, 4.9)       | 2.9 (0.7, 5.1)       | 3.1 (0.6, 5.4)       | 1.1 (-1.0, 3.1)          | 0.8 (-1.7, 3.4)      | 1.0 (-1.1, 3.1)      | 1.2 (-0.8, 3.1)      | 1.3 (-0.6, 3.3)      |
| <b>Oceania</b>                  |                          |                      |                      |                      |                      |                          |                      |                      |                      |                      |
| <b>Melanesia</b>                |                          |                      |                      |                      |                      |                          |                      |                      |                      |                      |
| <b>Fiji</b>                     |                          |                      |                      |                      |                      |                          |                      |                      |                      |                      |
| rural                           | 150.2 (146.6, 154.1)     | 114.5 (104.2, 125.1) | 141.8 (138.1, 145.9) | 168.6 (165.3, 172.2) | 174.3 (170.1, 178.6) | 149.3 (145.2, 153.4)     | 114.0 (102.3, 125.8) | 141.0 (136.2, 145.7) | 167.5 (164.8, 170.1) | 173.1 (170.6, 175.7) |
| urban                           | 151.3 (147.8, 155.1)     | 115.9 (105.6, 126.6) | 143.1 (139.3, 147.0) | 169.6 (166.2, 173.3) | 175.1 (170.9, 179.7) | 150.2 (146.0, 154.4)     | 115.3 (103.4, 127.0) | 142.0 (137.1, 146.7) | 168.3 (165.7, 170.8) | 173.7 (171.2, 176.2) |
| urban-rural difference          | 1.2 (-0.6, 3.0)          | 1.5 (-0.7, 3.7)      | 1.2 (-0.6, 3.1)      | 1.0 (-0.8, 2.8)      | 0.8 (-1.2, 2.8)      | 1.0 (-1.3, 3.2)          | 1.3 (-1.7, 4.3)      | 1.1 (-1.4, 3.5)      | 0.8 (-1.2, 2.8)      | 0.6 (-1.3, 2.5)      |
| <b>Papua New Guinea</b>         |                          |                      |                      |                      |                      |                          |                      |                      |                      |                      |
| rural                           | 141.6 (137.0, 146.4)     | 104.1 (93.2, 115.2)  | 133.0 (128.2, 137.9) | 160.8 (156.1, 165.7) | 166.9 (160.9, 172.7) | 140.5 (134.9, 146.0)     | 106.7 (94.0, 119.1)  | 132.8 (126.5, 139.1) | 158.2 (154.0, 162.3) | 162.4 (158.7, 166.1) |
| urban                           | 143.0 (138.1, 147.9)     | 105.6 (94.6, 116.7)  | 134.4 (129.3, 139.5) | 162.2 (157.1, 167.3) | 168.1 (162.0, 174.3) | 141.6 (135.8, 147.2)     | 107.8 (95.1, 120.2)  | 133.9 (127.4, 140.3) | 159.1 (154.7, 163.6) | 163.4 (159.3, 167.5) |
| urban-rural difference          | 1.4 (-0.9, 3.7)          | 1.5 (-1.0, 4.1)      | 1.4 (-0.8, 3.8)      | 1.3 (-1.0, 3.7)      | 1.3 (-1.4, 3.9)      | 1.0 (-1.5, 3.5)          | 1.2 (-2.0, 4.3)      | 1.1 (-1.6, 3.7)      | 1.0 (-1.3, 3.4)      | 0.9 (-1.4, 3.2)      |
| <b>Solomon Islands</b>          |                          |                      |                      |                      |                      |                          |                      |                      |                      |                      |
| rural                           | 143.2 (139.7, 146.8)     | 105.1 (100.6, 109.9) | 134.8 (131.1, 138.7) | 162.7 (158.6, 167.0) | 167.9 (162.8, 173.2) | 140.9 (137.1, 144.5)     | 106.4 (100.5, 112.3) | 133.3 (128.7, 137.8) | 158.8 (155.3, 162.3) | 162.6 (159.9, 165.4) |
| urban                           | 144.8 (141.1, 148.4)     | 106.4 (101.7, 111.5) | 136.3 (132.5, 140.3) | 164.4 (160.0, 168.8) | 169.7 (164.6, 175.0) | 141.8 (137.9, 145.6)     | 107.0 (101.0, 113.1) | 134.1 (129.5, 138.9) | 159.8 (156.2, 163.4) | 163.8 (160.8, 166.9) |
| urban-rural difference          | 1.6 (-0.4, 3.6)          | 1.3 (-0.9, 3.5)      | 1.5 (-0.5, 3.5)      | 1.7 (-0.3, 3.7)      | 1.8 (-0.4, 4.1)      | 0.9 (-1.2, 2.9)          | 0.7 (-2.0, 3.2)      | 0.8 (-1.4, 3.0)      | 1.0 (-1.0, 2.9)      | 1.2 (-0.8, 3.1)      |
| <b>Vanuatu</b>                  |                          |                      |                      |                      |                      |                          |                      |                      |                      |                      |
| rural                           | 145.2 (140.5, 149.7)     | 109.4 (98.5, 120.3)  | 137.3 (132.4, 142.2) | 163.7 (159.1, 168.3) | 168.0 (162.7, 173.3) | 144.8 (139.3, 150.3)     | 109.1 (96.7, 121.6)  | 136.9 (130.5, 143.2) | 163.3 (158.8, 167.6) | 167.7 (163.7, 171.4) |
| urban                           | 146.4 (141.6, 151.2)     | 110.7 (99.6, 121.9)  | 138.5 (133.5, 143.6) | 164.9 (160.1, 169.9) | 169.1 (163.6, 174.8) | 145.7 (140.0, 151.4)     | 110.1 (97.7, 122.6)  | 137.7 (131.2, 144.3) | 164.1 (159.4, 168.6) | 168.4 (164.3, 172.5) |
| urban-rural difference          | 1.2 (-1.1, 3.7)          | 1.4 (-1.2, 3.9)      | 1.3 (-1.1, 3.7)      | 1.2 (-1.2, 3.6)      | 1.2 (-1.5, 3.8)      | 0.9 (-1.6, 3.4)          | 1.0 (-2.2, 4.0)      | 0.9 (-1.8, 3.5)      | 0.8 (-1.6, 3.2)      | 0.8 (-1.5, 3.0)      |
| <b>Polynesia and Micronesia</b> |                          |                      |                      |                      |                      |                          |                      |                      |                      |                      |
| <b>American Samoa</b>           |                          |                      |                      |                      |                      |                          |                      |                      |                      |                      |
| rural                           | 150.5 (147.5, 153.4)     | 114.0 (108.1, 119.7) | 142.5 (138.3, 146.5) | 169.1 (165.3, 173.0) | 174.2 (169.8, 178.7) | 151.3 (146.4, 156.1)     | 115.3 (107.7, 122.8) | 143.3 (137.7, 148.8) | 169.7 (164.9, 174.6) | 174.8 (170.0, 179.6) |
| urban                           | 151.4 (148.3, 154.5)     | 115.2 (108.9, 121.5) | 143.5 (139.2, 147.6) | 169.9 (166.2, 173.7) | 174.8 (170.7, 179.1) | 152.2 (147.5, 157.0)     | 116.6 (108.8, 124.5) | 144.3 (138.8, 149.8) | 170.5 (165.7, 175.4) | 175.5 (170.9, 180.0) |
| urban-rural difference          | 0.9 (-1.5, 3.3)          | 1.2 (-1.4, 3.8)      | 1.0 (-1.4, 3.4)      | 0.8 (-1.6, 3.3)      | 0.6 (-2.0, 3.3)      | 1.0 (-1.6, 3.5)          | 1.3 (-1.9, 4.6)      | 1.1 (-1.7, 3.8)      | 0.8 (-1.6, 3.2)      | 0.7 (-1.7, 3.0)      |
| <b>Cook Islands</b>             |                          |                      |                      |                      |                      |                          |                      |                      |                      |                      |
| rural                           | 152.3 (148.5, 156.0)     | 117.6 (107.9, 127.7) | 144.6 (140.5, 148.7) | 170.3 (166.7, 173.9) | 174.4 (170.0, 178.8) | 153.8 (149.5, 158.1)     | 117.7 (106.5, 129.4) | 145.6 (140.6, 150.6) | 172.4 (169.6, 175.4) | 177.6 (174.8, 180.4) |
| urban                           | 153.2 (149.6, 156.9)     | 118.8 (109.1, 129.0) | 145.6 (141.7, 149.6) | 171.0 (167.8, 174.4) | 175.0 (170.9, 179.2) | 154.8 (150.7, 159.0)     | 119.1 (107.8, 130.5) | 146.7 (141.9, 151.6) | 173.3 (170.7, 176.0) | 178.3 (175.8, 180.8) |
| urban-rural difference          | 0.9 (-1.5, 3.2)          | 1.2 (-1.3, 3.9)      | 1.0 (-1.4, 3.4)      | 0.8 (-1.7, 3.2)      | 0.6 (-2.1, 3.2)      | 1.0 (-1.6, 3.6)          | 1.3 (-1.9, 4.6)      | 1.1 (-1.7, 3.8)      | 0.9 (-1.6, 3.3)      | 0.7 (-1.6, 3.0)      |
| <b>French Polynesia</b>         |                          |                      |                      |                      |                      |                          |                      |                      |                      |                      |
| rural                           | 154.2 (150.0, 158.4)     | 120.0 (110.2, 129.9) | 146.7 (142.6, 151.0) | 172.0 (167.3, 176.7) | 175.6 (169.4, 181.8) | 156.2 (152.3, 160.4)     | 121.6 (110.5, 132.7) | 148.6 (144.1, 153.2) | 174.3 (171.5, 177.0) | 178.2 (175.5, 181.0) |
| urban                           | 155.1 (151.0, 159.2)     | 121.2 (111.6, 131.4) | 147.7 (143.7, 152.0) | 172.8 (168.2, 177.3) | 176.2 (170.0, 182.1) | 157.2 (153.4, 161.1)     | 122.9 (112.0, 134.1) | 149.7 (145.3, 154.1) | 175.1 (172.6, 177.7) | 178.9 (176.4, 181.5) |
| urban-rural difference          | 0.9 (-1.5, 3.2)          | 1.2 (-1.3, 3.9)      | 1.0 (-1.3, 3.3)      | 0.7 (-1.7, 3.1)      | 0.6 (-2.1, 3.2)      | 1.0 (-1.5, 3.6)          | 1.3 (-1.9, 4.6)      | 1.1 (-1.6, 3.8)      | 0.8 (-1.5, 3.2)      | 0.7 (-1.6, 3.0)      |
| <b>Kiribati</b>                 |                          |                      |                      |                      |                      |                          |                      |                      |                      |                      |
| rural                           | 146.4 (142.3, 150.5)     | 110.8 (100.9, 120.4) | 138.7 (134.3, 143.1) | 164.8 (160.7, 169.0) | 168.9 (164.1, 173.9) | 147.4 (142.5, 152.3)     | 112.6 (100.8, 124.5) | 139.7 (134.0, 145.6) | 165.5 (161.8, 169.3) | 169.5 (166.6, 172.4) |
| urban                           | 147.2 (143.1, 151.5)     | 112.0 (101.9, 121.9) | 139.6 (135.2, 144.1) | 165.5 (161.4, 169.7) | 169.4 (164.4, 174.6) | 148.3 (143.4, 153.3)     | 113.8 (102.1, 125.7) | 140.8 (135.0, 146.6) | 166.3 (162.6, 170.0) | 170.1 (167.1, 173.1) |

| Boys                                    | Mean height in 1990 (cm) |                      |                      |                      |                      | Mean height in 2020 (cm) |                      |                      |                      |                      |
|-----------------------------------------|--------------------------|----------------------|----------------------|----------------------|----------------------|--------------------------|----------------------|----------------------|----------------------|----------------------|
|                                         | Age-standardised         | 5 years              | 10 years             | 15 years             | 19 years             | Age-standardised         | 5 years              | 10 years             | 15 years             | 19 years             |
| urban-rural difference                  | 0.8 (-1.6, 3.2)          | 1.2 (-1.4, 3.8)      | 0.9 (-1.5, 3.3)      | 0.7 (-1.8, 3.1)      | 0.5 (-2.3, 3.2)      | 0.9 (-1.7, 3.5)          | 1.2 (-1.9, 4.5)      | 1.0 (-1.7, 3.8)      | 0.8 (-1.7, 3.2)      | 0.6 (-1.8, 3.0)      |
| <b>Marshall Islands</b>                 |                          |                      |                      |                      |                      |                          |                      |                      |                      |                      |
| rural                                   | 140.9 (136.8, 145.1)     | 104.4 (94.3, 114.1)  | 132.7 (128.4, 137.1) | 159.7 (155.8, 163.7) | 165.0 (160.4, 169.7) | 141.7 (136.9, 146.7)     | 107.9 (96.1, 119.6)  | 134.2 (128.7, 139.9) | 159.3 (155.8, 163.0) | 163.5 (160.6, 166.4) |
| urban                                   | 141.6 (137.6, 145.6)     | 105.4 (95.3, 115.4)  | 133.5 (129.3, 137.8) | 160.3 (156.6, 164.0) | 165.4 (161.0, 169.8) | 142.5 (137.8, 147.4)     | 108.9 (97.1, 120.9)  | 135.0 (129.6, 140.7) | 159.9 (156.5, 163.3) | 163.9 (161.4, 166.4) |
| urban-rural difference                  | 0.7 (-1.7, 3.0)          | 1.0 (-1.6, 3.6)      | 0.8 (-1.6, 3.1)      | 0.5 (-1.9, 3.0)      | 0.4 (-2.4, 3.1)      | 0.7 (-1.8, 3.3)          | 1.0 (-2.2, 4.4)      | 0.8 (-1.9, 3.6)      | 0.6 (-1.9, 3.0)      | 0.4 (-2.0, 2.8)      |
| <b>Micronesia (Federated States of)</b> |                          |                      |                      |                      |                      |                          |                      |                      |                      |                      |
| rural                                   | 146.5 (142.8, 150.3)     | 110.2 (100.5, 120.0) | 138.5 (134.4, 142.6) | 165.2 (161.7, 168.8) | 170.2 (165.9, 174.5) | 147.2 (142.5, 151.8)     | 112.6 (101.2, 124.1) | 139.5 (134.0, 144.9) | 165.1 (161.7, 168.6) | 169.5 (166.7, 172.4) |
| urban                                   | 147.2 (143.3, 151.1)     | 111.3 (101.5, 121.2) | 139.3 (135.0, 143.6) | 165.7 (162.0, 169.4) | 170.3 (165.9, 174.8) | 148.1 (143.1, 152.8)     | 113.9 (102.5, 125.4) | 140.5 (134.7, 146.0) | 165.8 (162.2, 169.5) | 169.9 (166.9, 173.0) |
| urban-rural difference                  | 0.6 (-1.3, 2.5)          | 1.1 (-1.2, 3.5)      | 0.8 (-1.2, 2.7)      | 0.4 (-1.6, 2.4)      | 0.2 (-2.0, 2.3)      | 0.9 (-1.4, 3.3)          | 1.3 (-1.7, 4.5)      | 1.0 (-1.5, 3.6)      | 0.7 (-1.4, 2.8)      | 0.4 (-1.5, 2.4)      |
| <b>Nauru</b>                            |                          |                      |                      |                      |                      |                          |                      |                      |                      |                      |
| rural                                   | 145.7 (141.6, 149.8)     | 110.4 (100.1, 120.8) | 138.2 (133.8, 142.6) | 164.1 (159.8, 168.2) | 167.6 (162.4, 172.7) | 147.0 (142.0, 152.0)     | 111.9 (99.9, 123.8)  | 139.5 (133.7, 145.1) | 165.3 (161.4, 169.2) | 168.9 (165.7, 172.2) |
| urban                                   | 146.5 (142.7, 150.3)     | 111.5 (101.3, 121.9) | 139.0 (135.0, 143.1) | 164.6 (160.9, 168.3) | 168.0 (163.2, 172.6) | 147.9 (143.1, 152.6)     | 113.1 (100.9, 124.9) | 140.4 (134.9, 146.0) | 166.0 (162.5, 169.4) | 169.4 (166.9, 172.0) |
| urban-rural difference                  | 0.7 (-1.6, 3.1)          | 1.1 (-1.5, 3.7)      | 0.8 (-1.5, 3.2)      | 0.6 (-1.9, 3.0)      | 0.4 (-2.3, 3.0)      | 0.8 (-1.8, 3.4)          | 1.2 (-2.0, 4.4)      | 0.9 (-1.9, 3.6)      | 0.7 (-1.8, 3.0)      | 0.5 (-1.9, 2.8)      |
| <b>Niue</b>                             |                          |                      |                      |                      |                      |                          |                      |                      |                      |                      |
| rural                                   | 153.4 (149.1, 157.6)     | 119.1 (109.2, 129.2) | 146.1 (141.9, 150.4) | 171.2 (166.7, 175.8) | 174.2 (168.2, 180.4) | 154.8 (151.1, 158.6)     | 119.8 (109.0, 130.9) | 147.2 (142.8, 151.6) | 173.0 (170.6, 175.4) | 176.8 (174.3, 179.3) |
| urban                                   | 154.1 (149.9, 158.5)     | 120.2 (110.2, 130.3) | 147.0 (142.7, 151.3) | 171.9 (167.2, 176.4) | 174.7 (168.5, 180.9) | 155.6 (151.7, 159.6)     | 120.9 (110.1, 131.9) | 148.1 (143.5, 152.6) | 173.7 (171.2, 176.3) | 177.3 (174.8, 180.0) |
| urban-rural difference                  | 0.8 (-1.6, 3.1)          | 1.1 (-1.5, 3.7)      | 0.9 (-1.5, 3.2)      | 0.6 (-1.9, 3.0)      | 0.5 (-2.2, 3.1)      | 0.8 (-1.8, 3.4)          | 1.2 (-2.1, 4.4)      | 0.9 (-1.9, 3.7)      | 0.7 (-1.7, 3.1)      | 0.5 (-1.8, 2.9)      |
| <b>Palau</b>                            |                          |                      |                      |                      |                      |                          |                      |                      |                      |                      |
| rural                                   | 146.6 (141.7, 151.5)     | 110.8 (100.5, 121.1) | 138.9 (133.8, 144.0) | 165.1 (160.1, 170.2) | 169.2 (162.7, 175.7) | 148.3 (143.0, 153.5)     | 113.2 (101.1, 125.2) | 140.6 (134.7, 146.6) | 166.5 (162.3, 170.7) | 170.3 (167.1, 173.4) |
| urban                                   | 147.4 (142.7, 152.2)     | 112.0 (101.5, 122.4) | 139.7 (134.7, 144.7) | 165.8 (160.8, 170.7) | 169.6 (163.4, 175.9) | 149.2 (143.9, 154.3)     | 114.4 (102.1, 126.5) | 141.6 (135.6, 147.5) | 167.3 (163.1, 171.3) | 170.9 (168.0, 173.8) |
| urban-rural difference                  | 0.8 (-1.6, 3.2)          | 1.1 (-1.5, 3.8)      | 0.9 (-1.5, 3.3)      | 0.6 (-1.8, 3.1)      | 0.5 (-2.2, 3.1)      | 0.9 (-1.7, 3.4)          | 1.2 (-2.0, 4.5)      | 1.0 (-1.8, 3.7)      | 0.7 (-1.6, 3.1)      | 0.6 (-1.8, 2.8)      |
| <b>Samoa</b>                            |                          |                      |                      |                      |                      |                          |                      |                      |                      |                      |
| rural                                   | 146.3 (144.4, 148.1)     | 110.1 (106.3, 113.8) | 138.2 (135.3, 141.1) | 164.8 (162.2, 167.4) | 170.3 (167.3, 173.4) | 147.8 (143.8, 151.9)     | 110.1 (102.9, 117.1) | 139.0 (134.2, 143.9) | 167.0 (163.4, 170.9) | 174.1 (171.3, 176.9) |
| urban                                   | 146.9 (144.6, 149.2)     | 111.1 (106.9, 115.3) | 138.9 (135.8, 142.1) | 165.2 (162.3, 168.1) | 170.5 (167.0, 173.9) | 148.5 (144.3, 152.8)     | 111.3 (103.7, 118.4) | 139.8 (134.9, 144.6) | 167.6 (163.7, 171.5) | 174.3 (171.2, 177.4) |
| urban-rural difference                  | 0.6 (-1.5, 2.7)          | 1.0 (-1.4, 3.6)      | 0.7 (-1.4, 2.8)      | 0.4 (-1.8, 2.5)      | 0.2 (-2.3, 2.5)      | 0.7 (-1.7, 3.2)          | 1.1 (-2.0, 4.3)      | 0.8 (-1.7, 3.5)      | 0.5 (-1.7, 2.7)      | 0.3 (-1.9, 2.4)      |
| <b>Tokelau</b>                          |                          |                      |                      |                      |                      |                          |                      |                      |                      |                      |
| rural                                   | 151.5 (147.4, 155.5)     | 116.3 (106.1, 126.3) | 143.8 (139.4, 148.0) | 169.7 (165.5, 173.9) | 173.7 (168.6, 178.9) | 152.7 (147.9, 157.5)     | 116.7 (104.6, 128.6) | 144.7 (139.0, 150.3) | 171.3 (167.8, 174.9) | 176.1 (173.3, 178.9) |
| urban                                   | 152.2 (147.6, 156.9)     | 117.3 (107.1, 127.7) | 144.6 (139.7, 149.4) | 170.3 (165.5, 175.0) | 174.1 (168.5, 179.9) | 153.5 (148.4, 158.6)     | 117.8 (105.7, 129.9) | 145.6 (139.7, 151.4) | 172.0 (168.0, 175.9) | 176.5 (173.1, 180.1) |
| urban-rural difference                  | 0.7 (-1.7, 3.1)          | 1.0 (-1.6, 3.7)      | 0.8 (-1.6, 3.2)      | 0.6 (-1.9, 3.0)      | 0.4 (-2.3, 3.0)      | 0.8 (-1.8, 3.3)          | 1.1 (-2.2, 4.3)      | 0.8 (-1.9, 3.6)      | 0.6 (-1.8, 3.0)      | 0.4 (-1.9, 2.7)      |
| <b>Tonga</b>                            |                          |                      |                      |                      |                      |                          |                      |                      |                      |                      |
| rural                                   | 151.0 (147.6, 154.5)     | 116.2 (107.5, 125.4) | 143.1 (139.9, 146.5) | 169.0 (165.3, 172.7) | 174.1 (169.0, 179.1) | 150.9 (147.5, 154.2)     | 115.7 (105.6, 126.2) | 142.6 (138.8, 146.4) | 169.0 (166.9, 171.1) | 175.0 (173.1, 176.9) |
| urban                                   | 151.7 (147.9, 155.5)     | 117.2 (108.1, 126.7) | 143.8 (140.2, 147.6) | 169.5 (165.4, 173.5) | 174.5 (169.0, 179.7) | 151.7 (147.9, 155.6)     | 116.9 (106.5, 127.6) | 143.5 (139.2, 147.8) | 169.7 (167.0, 172.4) | 175.4 (172.9, 178.0) |
| urban-rural difference                  | 0.7 (-1.7, 3.0)          | 1.0 (-1.7, 3.6)      | 0.8 (-1.7, 3.1)      | 0.5 (-2.0, 2.9)      | 0.3 (-2.4, 3.0)      | 0.8 (-1.8, 3.3)          | 1.1 (-2.1, 4.3)      | 0.9 (-1.8, 3.6)      | 0.6 (-1.8, 3.0)      | 0.5 (-1.9, 2.8)      |
| <b>Tuvalu</b>                           |                          |                      |                      |                      |                      |                          |                      |                      |                      |                      |
| rural                                   | 148.3 (143.6, 153.0)     | 113.0 (103.1, 122.9) | 140.6 (136.0, 145.2) | 166.5 (161.5, 171.4) | 170.8 (163.9, 177.6) | 148.6 (144.0, 153.3)     | 114.0 (102.4, 125.8) | 140.9 (135.6, 146.5) | 166.6 (163.4, 169.9) | 170.9 (168.1, 173.7) |
| urban                                   | 149.1 (144.6, 153.8)     | 114.1 (104.3, 124.3) | 141.5 (137.0, 146.3) | 167.3 (162.2, 172.2) | 171.3 (164.5, 178.0) | 149.6 (145.1, 154.2)     | 115.3 (103.9, 127.0) | 141.9 (136.7, 147.4) | 167.4 (164.2, 170.5) | 171.5 (168.9, 174.1) |
| urban-rural difference                  | 0.9 (-1.5, 3.3)          | 1.2 (-1.4, 3.9)      | 0.9 (-1.4, 3.3)      | 0.7 (-1.7, 3.2)      | 0.5 (-2.2, 3.2)      | 0.9 (-1.7, 3.6)          | 1.2 (-2.0, 4.7)      | 1.0 (-1.8, 3.9)      | 0.8 (-1.7, 3.2)      | 0.6 (-1.9, 3.0)      |
| <b>South Asia</b>                       |                          |                      |                      |                      |                      |                          |                      |                      |                      |                      |
| <b>Afghanistan</b>                      |                          |                      |                      |                      |                      |                          |                      |                      |                      |                      |
| rural                                   | 141.0 (136.0, 146.0)     | 104.7 (94.6, 114.8)  | 132.6 (127.6, 137.8) | 159.6 (154.4, 164.7) | 165.7 (159.2, 172.1) | 143.0 (138.5, 147.7)     | 106.8 (95.9, 117.8)  | 134.7 (129.3, 140.1) | 161.5 (158.0, 165.1) | 167.8 (165.3, 170.3) |
| urban                                   | 142.3 (137.2, 147.5)     | 106.4 (96.4, 116.5)  | 134.0 (128.9, 139.3) | 160.7 (155.5, 166.0) | 166.7 (160.1, 173.2) | 144.1 (139.4, 148.7)     | 108.2 (97.1, 119.2)  | 135.8 (130.4, 141.3) | 162.4 (158.9, 165.9) | 168.5 (166.1, 171.0) |
| urban-rural difference                  | 1.3 (-0.5, 3.1)          | 1.6 (-0.4, 3.8)      | 1.4 (-0.5, 3.2)      | 1.2 (-0.7, 2.9)      | 1.0 (-1.1, 2.9)      | 1.1 (-0.7, 2.8)          | 1.4 (-1.0, 3.8)      | 1.2 (-0.8, 3.1)      | 0.9 (-0.7, 2.5)      | 0.7 (-0.9, 2.3)      |
| <b>Bangladesh</b>                       |                          |                      |                      |                      |                      |                          |                      |                      |                      |                      |
| rural                                   | 138.5 (135.9, 141.1)     | 99.4 (91.6, 107.0)   | 130.3 (127.4, 133.0) | 158.4 (156.0, 160.7) | 163.7 (160.5, 166.9) | 142.0 (140.1, 144.0)     | 104.8 (97.7, 111.6)  | 134.5 (132.6, 136.5) | 160.9 (159.4, 162.4) | 164.7 (163.2, 166.2) |
| urban                                   | 140.4 (137.7, 143.0)     | 101.7 (93.8, 109.2)  | 132.2 (129.3, 135.1) | 160.1 (157.7, 162.4) | 165.2 (162.1, 168.4) | 143.6 (141.5, 145.6)     | 106.8 (99.6, 113.7)  | 136.2 (134.2, 138.2) | 162.3 (160.8, 163.9) | 165.8 (164.3, 167.4) |
| urban-rural difference                  | 1.9 (0.6, 3.3)           | 2.3 (0.6, 4.1)       | 2.0 (0.6, 3.5)       | 1.7 (0.4, 3.0)       | 1.5 (0.1, 2.9)       | 1.6 (0.4, 2.7)           | 2.0 (0.3, 3.8)       | 1.7 (0.4, 3.0)       | 1.4 (0.4, 2.4)       | 1.2 (0.2, 2.1)       |
| <b>Bhutan</b>                           |                          |                      |                      |                      |                      |                          |                      |                      |                      |                      |
| rural                                   | 138.3 (134.1, 142.5)     | 102.1 (92.2, 111.4)  | 130.0 (125.6, 134.4) | 157.0 (152.7, 161.2) | 162.8 (157.3, 168.4) | 140.9 (137.0, 144.7)     | 104.7 (93.7, 115.1)  | 132.6 (128.3, 137.0) | 159.4 (157.0, 161.9) | 165.1 (163.0, 167.2) |
| urban                                   | 140.2 (136.0, 144.3)     | 104.2 (94.2, 113.6)  | 131.9 (127.5, 136.2) | 158.7 (154.6, 162.8) | 164.4 (159.0, 169.9) | 142.6 (138.7, 146.4)     | 106.8 (95.8, 117.3)  | 134.5 (130.1, 138.9) | 161.1 (158.6, 163.6) | 166.6 (164.5, 168.7) |
| urban-rural difference                  | 1.8 (0.1, 3.6)           | 2.1 (0.1, 4.2)       | 1.9 (0.1, 3.7)       | 1.7 (-0.1, 3.5)      | 1.6 (-0.5, 3.5)      | 1.8 (0.1, 3.4)           | 2.0 (-0.2, 4.3)      | 1.9 (0.0, 3.6)       | 1.7 (0.1, 3.2)       | 1.5 (0.0, 3.0)       |
| <b>India</b>                            |                          |                      |                      |                      |                      |                          |                      |                      |                      |                      |

| Boys                            | Mean height in 1990 (cm) |                      |                      |                      |                      | Mean height in 2020 (cm) |                      |                      |                      |                      |
|---------------------------------|--------------------------|----------------------|----------------------|----------------------|----------------------|--------------------------|----------------------|----------------------|----------------------|----------------------|
|                                 | Age-standardised         | 5 years              | 10 years             | 15 years             | 19 years             | Age-standardised         | 5 years              | 10 years             | 15 years             | 19 years             |
| rural                           | 137.0 (136.5, 137.5)     | 101.4 (100.7, 102.0) | 127.8 (127.1, 128.4) | 155.7 (155.1, 156.3) | 163.5 (162.8, 164.2) | 141.6 (140.7, 142.6)     | 107.6 (105.3, 109.8) | 133.2 (132.1, 134.3) | 159.4 (158.6, 160.2) | 166.1 (165.3, 166.9) |
| urban                           | 139.2 (138.3, 140.1)     | 104.0 (102.9, 105.2) | 130.1 (129.1, 131.1) | 157.6 (156.7, 158.6) | 165.1 (164.1, 166.2) | 143.0 (142.0, 144.0)     | 109.4 (107.2, 111.6) | 134.7 (133.6, 135.8) | 160.5 (159.7, 161.4) | 167.0 (166.1, 167.8) |
| urban-rural difference          | 2.2 (1.4, 3.0)           | 2.6 (1.7, 3.7)       | 2.3 (1.5, 3.2)       | 1.9 (1.2, 2.8)       | 1.7 (0.9, 2.5)       | 1.4 (0.7, 2.0)           | 1.8 (1.0, 2.7)       | 1.5 (0.8, 2.1)       | 1.1 (0.5, 1.7)       | 0.9 (0.2, 1.5)       |
| <b>Nepal</b>                    |                          |                      |                      |                      |                      |                          |                      |                      |                      |                      |
| rural                           | 138.5 (135.1, 142.0)     | 102.0 (92.5, 111.2)  | 130.5 (127.0, 134.0) | 157.3 (154.2, 160.4) | 162.2 (157.8, 166.5) | 140.9 (137.5, 144.3)     | 105.6 (95.2, 115.9)  | 133.3 (129.4, 137.2) | 159.0 (157.3, 160.7) | 163.1 (161.8, 164.6) |
| urban                           | 141.2 (137.8, 144.7)     | 105.2 (95.6, 114.3)  | 133.4 (129.9, 136.8) | 159.8 (156.8, 163.0) | 164.4 (160.1, 168.7) | 143.9 (140.5, 147.3)     | 109.1 (98.6, 119.1)  | 136.5 (132.7, 140.3) | 161.9 (160.2, 163.6) | 165.8 (164.4, 167.2) |
| urban-rural difference          | 2.7 (1.3, 4.0)           | 3.1 (1.4, 5.0)       | 2.8 (1.3, 4.3)       | 2.5 (1.0, 3.8)       | 2.3 (0.6, 3.7)       | 3.0 (1.8, 4.3)           | 3.5 (1.5, 5.6)       | 3.2 (1.8, 4.7)       | 2.8 (1.9, 3.9)       | 2.6 (1.7, 3.5)       |
| <b>Pakistan</b>                 |                          |                      |                      |                      |                      |                          |                      |                      |                      |                      |
| rural                           | 141.2 (139.6, 143.0)     | 104.1 (102.2, 106.1) | 132.4 (130.7, 134.2) | 160.3 (158.5, 162.2) | 167.3 (165.0, 169.6) | 140.3 (138.5, 142.0)     | 106.0 (102.4, 109.5) | 132.2 (130.2, 134.1) | 158.0 (156.4, 159.5) | 163.9 (162.3, 165.6) |
| urban                           | 142.5 (140.8, 144.3)     | 105.4 (103.5, 107.3) | 133.7 (132.0, 135.4) | 161.6 (159.8, 163.5) | 168.6 (166.3, 171.0) | 142.1 (140.3, 143.8)     | 107.8 (104.2, 111.3) | 134.0 (132.0, 135.9) | 159.8 (158.2, 161.4) | 165.8 (164.1, 167.4) |
| urban-rural difference          | 1.3 (0.2, 2.2)           | 1.3 (0.1, 2.4)       | 1.3 (0.2, 2.2)       | 1.3 (0.2, 2.3)       | 1.3 (-0.1, 2.5)      | 1.8 (0.9, 2.8)           | 1.8 (0.5, 3.2)       | 1.8 (0.8, 2.9)       | 1.8 (1.0, 2.7)       | 1.8 (0.9, 2.8)       |
| <b>Sri Lanka</b>                |                          |                      |                      |                      |                      |                          |                      |                      |                      |                      |
| rural                           | 139.4 (135.6, 143.1)     | 103.2 (93.7, 112.5)  | 131.0 (127.3, 134.8) | 157.9 (154.1, 161.8) | 164.2 (159.3, 169.1) | 141.9 (138.3, 145.5)     | 105.1 (94.4, 115.5)  | 133.4 (129.2, 137.5) | 160.6 (158.3, 162.9) | 167.1 (164.9, 169.3) |
| urban                           | 141.2 (137.2, 145.2)     | 105.4 (95.8, 114.8)  | 132.9 (128.9, 136.8) | 159.7 (155.7, 163.7) | 165.7 (160.7, 170.8) | 143.5 (139.6, 147.4)     | 107.0 (96.4, 117.5)  | 135.1 (130.6, 139.5) | 162.2 (159.5, 164.9) | 168.5 (165.9, 171.2) |
| urban-rural difference          | 1.8 (-0.2, 3.9)          | 2.1 (-0.1, 4.4)      | 1.9 (-0.1, 4.0)      | 1.7 (-0.4, 3.8)      | 1.6 (-0.7, 3.8)      | 1.7 (-0.4, 3.6)          | 1.9 (-0.6, 4.4)      | 1.7 (-0.4, 3.8)      | 1.5 (-0.4, 3.4)      | 1.4 (-0.5, 3.3)      |
| <b>Sub-Saharan Africa</b>       |                          |                      |                      |                      |                      |                          |                      |                      |                      |                      |
| <b>Central Africa</b>           |                          |                      |                      |                      |                      |                          |                      |                      |                      |                      |
| <b>Angola</b>                   |                          |                      |                      |                      |                      |                          |                      |                      |                      |                      |
| rural                           | 140.8 (135.1, 146.3)     | 106.8 (96.0, 117.6)  | 131.9 (126.4, 137.3) | 158.3 (152.3, 164.0) | 166.8 (159.6, 173.9) | 142.1 (136.6, 147.5)     | 109.6 (97.4, 121.8)  | 133.5 (127.5, 139.6) | 158.9 (154.5, 163.1) | 166.8 (162.6, 170.9) |
| urban                           | 143.0 (137.4, 148.4)     | 109.3 (98.4, 120.1)  | 134.2 (128.8, 139.5) | 160.3 (154.5, 166.0) | 168.7 (161.5, 175.9) | 144.2 (138.9, 149.6)     | 112.1 (99.9, 124.2)  | 135.8 (129.9, 141.9) | 160.9 (156.7, 165.1) | 168.7 (164.5, 172.8) |
| urban-rural difference          | 2.2 (0.1, 4.4)           | 2.5 (0.2, 4.9)       | 2.3 (0.2, 4.4)       | 2.1 (-0.1, 4.3)      | 1.9 (-0.5, 4.3)      | 2.2 (0.1, 4.2)           | 2.5 (-0.2, 5.2)      | 2.2 (0.1, 4.5)       | 2.0 (0.2, 3.9)       | 1.9 (0.0, 3.7)       |
| <b>Central African Republic</b> |                          |                      |                      |                      |                      |                          |                      |                      |                      |                      |
| rural                           | 142.4 (137.2, 147.7)     | 108.8 (97.8, 119.9)  | 133.4 (128.1, 138.9) | 159.7 (154.2, 165.2) | 168.7 (162.2, 175.1) | 143.5 (137.6, 149.5)     | 111.0 (98.5, 123.7)  | 134.8 (128.2, 141.6) | 160.3 (155.5, 165.3) | 168.9 (164.8, 173.1) |
| urban                           | 144.7 (139.5, 150.0)     | 111.4 (100.4, 122.4) | 135.8 (130.4, 141.3) | 161.8 (156.5, 167.5) | 170.7 (164.2, 177.0) | 145.7 (140.0, 151.6)     | 113.5 (101.1, 125.9) | 137.1 (130.6, 143.6) | 162.4 (157.5, 167.4) | 170.9 (166.7, 175.0) |
| urban-rural difference          | 2.3 (0.1, 4.5)           | 2.5 (0.2, 5.0)       | 2.4 (0.2, 4.6)       | 2.2 (-0.1, 4.5)      | 2.0 (-0.6, 4.6)      | 2.2 (0.0, 4.5)           | 2.5 (-0.3, 5.3)      | 2.3 (0.0, 4.7)       | 2.1 (0.1, 4.3)       | 2.0 (-0.1, 4.1)      |
| <b>Congo</b>                    |                          |                      |                      |                      |                      |                          |                      |                      |                      |                      |
| rural                           | 140.8 (137.6, 143.8)     | 106.2 (102.8, 109.5) | 131.4 (128.1, 134.5) | 158.5 (155.1, 161.8) | 168.8 (165.1, 172.4) | 141.9 (137.1, 146.7)     | 109.0 (101.7, 116.5) | 132.7 (127.4, 138.2) | 158.9 (154.3, 163.4) | 168.6 (163.6, 173.6) |
| urban                           | 143.0 (140.7, 145.3)     | 108.6 (106.1, 111.0) | 133.6 (131.2, 136.0) | 160.6 (158.1, 163.1) | 170.8 (168.3, 173.4) | 144.0 (139.5, 148.7)     | 111.3 (104.3, 118.6) | 134.9 (129.7, 140.2) | 160.9 (156.7, 165.3) | 170.6 (165.7, 175.4) |
| urban-rural difference          | 2.2 (0.1, 4.4)           | 2.4 (0.1, 4.8)       | 2.2 (0.1, 4.4)       | 2.1 (-0.1, 4.4)      | 2.0 (-0.5, 4.6)      | 2.2 (0.0, 4.4)           | 2.4 (-0.5, 5.2)      | 2.2 (-0.1, 4.6)      | 2.1 (0.0, 4.1)       | 2.0 (-0.1, 4.0)      |
| <b>DR Congo</b>                 |                          |                      |                      |                      |                      |                          |                      |                      |                      |                      |
| rural                           | 140.8 (136.4, 145.1)     | 108.6 (98.9, 118.3)  | 132.2 (127.9, 136.4) | 157.5 (152.8, 162.0) | 165.8 (160.3, 171.2) | 142.0 (137.5, 146.7)     | 111.3 (99.8, 122.4)  | 133.8 (128.6, 139.0) | 158.1 (154.5, 161.8) | 165.8 (162.5, 169.1) |
| urban                           | 143.5 (139.5, 147.5)     | 111.6 (102.1, 121.2) | 135.0 (131.0, 138.8) | 160.1 (155.7, 164.4) | 168.3 (163.0, 173.5) | 144.7 (140.3, 149.2)     | 114.2 (102.8, 125.1) | 136.5 (131.4, 141.6) | 160.7 (157.3, 164.1) | 168.3 (165.1, 171.3) |
| urban-rural difference          | 2.7 (0.7, 4.7)           | 3.0 (0.7, 5.2)       | 2.8 (0.8, 4.8)       | 2.6 (0.6, 4.7)       | 2.5 (0.2, 4.8)       | 2.7 (0.6, 4.7)           | 2.9 (0.2, 5.7)       | 2.7 (0.5, 5.0)       | 2.6 (0.7, 4.5)       | 2.4 (0.7, 4.2)       |
| <b>Equatorial Guinea</b>        |                          |                      |                      |                      |                      |                          |                      |                      |                      |                      |
| rural                           | 141.9 (134.6, 149.4)     | 108.2 (96.2, 120.5)  | 132.9 (125.7, 140.3) | 159.2 (152.0, 166.7) | 168.1 (159.1, 177.2) | 143.0 (135.6, 150.5)     | 110.6 (97.5, 123.8)  | 134.3 (126.5, 142.1) | 159.8 (153.0, 166.6) | 168.2 (160.6, 176.1) |
| urban                           | 144.1 (137.0, 151.4)     | 110.8 (98.5, 122.9)  | 135.3 (128.1, 142.5) | 161.4 (154.1, 168.9) | 170.2 (161.4, 179.2) | 145.2 (137.8, 152.8)     | 113.1 (100.0, 126.3) | 136.6 (128.9, 144.6) | 161.9 (155.0, 168.9) | 170.2 (162.6, 178.0) |
| urban-rural difference          | 2.3 (0.0, 4.6)           | 2.5 (0.1, 5.0)       | 2.3 (0.1, 4.7)       | 2.2 (-0.2, 4.6)      | 2.0 (-0.6, 4.7)      | 2.2 (0.0, 4.5)           | 2.5 (-0.4, 5.4)      | 2.3 (-0.1, 4.7)      | 2.1 (0.0, 4.2)       | 2.0 (-0.1, 4.1)      |
| <b>Gabon</b>                    |                          |                      |                      |                      |                      |                          |                      |                      |                      |                      |
| rural                           | 143.5 (138.1, 149.1)     | 109.7 (98.7, 120.4)  | 134.7 (129.3, 140.2) | 161.0 (155.2, 166.9) | 169.5 (162.7, 176.5) | 144.4 (138.6, 150.4)     | 112.3 (99.5, 124.7)  | 136.0 (129.4, 142.4) | 161.2 (156.5, 166.1) | 169.0 (164.3, 173.9) |
| urban                           | 145.9 (140.5, 151.2)     | 112.3 (101.4, 122.9) | 137.1 (131.8, 142.5) | 163.2 (157.8, 168.8) | 171.6 (165.1, 178.2) | 146.8 (140.9, 152.6)     | 114.8 (102.1, 127.1) | 138.3 (132.0, 144.8) | 163.4 (158.8, 168.2) | 171.1 (166.7, 175.7) |
| urban-rural difference          | 2.4 (0.1, 4.6)           | 2.6 (0.2, 5.1)       | 2.4 (0.2, 4.7)       | 2.2 (-0.1, 4.6)      | 2.1 (-0.5, 4.7)      | 2.3 (0.0, 4.5)           | 2.6 (-0.4, 5.5)      | 2.4 (-0.1, 4.8)      | 2.2 (0.1, 4.2)       | 2.0 (0.0, 4.1)       |
| <b>East Africa</b>              |                          |                      |                      |                      |                      |                          |                      |                      |                      |                      |
| <b>Burundi</b>                  |                          |                      |                      |                      |                      |                          |                      |                      |                      |                      |
| rural                           | 142.9 (136.1, 149.6)     | 108.9 (97.8, 119.5)  | 133.9 (127.1, 140.6) | 160.9 (154.2, 167.6) | 168.2 (159.8, 176.8) | 144.2 (137.3, 151.0)     | 111.7 (99.4, 123.5)  | 135.5 (128.3, 142.5) | 161.6 (155.0, 167.8) | 168.6 (161.4, 175.8) |
| urban                           | 144.7 (137.9, 151.4)     | 111.2 (100.1, 121.9) | 135.9 (129.2, 142.5) | 162.5 (155.8, 169.4) | 169.6 (161.3, 178.3) | 146.8 (139.9, 153.5)     | 114.7 (102.5, 126.4) | 138.2 (131.1, 145.2) | 164.0 (157.5, 170.1) | 170.7 (163.6, 177.9) |
| urban-rural difference          | 1.9 (-0.2, 4.0)          | 2.3 (0.0, 4.7)       | 2.0 (-0.1, 4.1)      | 1.7 (-0.5, 3.8)      | 1.4 (-0.9, 3.7)      | 2.6 (0.6, 4.6)           | 3.0 (0.5, 5.6)       | 2.7 (0.6, 4.9)       | 2.4 (0.5, 4.3)       | 2.1 (0.2, 4.0)       |
| <b>Comoros</b>                  |                          |                      |                      |                      |                      |                          |                      |                      |                      |                      |
| rural                           | 141.9 (137.4, 146.4)     | 107.9 (98.6, 117.3)  | 133.0 (128.3, 137.7) | 159.9 (155.2, 164.7) | 167.1 (161.1, 173.1) | 143.3 (138.3, 148.2)     | 110.9 (100.1, 122.0) | 134.6 (129.0, 140.2) | 160.7 (156.4, 165.0) | 167.4 (163.6, 171.1) |
| urban                           | 143.8 (139.0, 148.4)     | 110.2 (100.8, 119.7) | 135.0 (130.1, 139.7) | 161.6 (156.7, 166.6) | 168.6 (162.4, 174.6) | 145.9 (140.8, 151.0)     | 113.9 (103.0, 124.9) | 137.4 (131.6, 143.1) | 163.0 (158.7, 167.6) | 169.6 (165.6, 173.5) |
| urban-rural difference          | 1.9 (-0.1, 3.9)          | 2.3 (0.1, 4.6)       | 2.0 (0.0, 4.1)       | 1.7 (-0.4, 3.8)      | 1.4 (-0.8, 3.7)      | 2.6 (0.6, 4.6)           | 3.0 (0.5, 5.6)       | 2.7 (0.6, 4.9)       | 2.4 (0.5, 4.3)       | 2.1 (0.2, 4.1)       |
| <b>Djibouti</b>                 |                          |                      |                      |                      |                      |                          |                      |                      |                      |                      |

| Boys                   | Mean height in 1990 (cm) |                      |                      |                      |                      | Mean height in 2020 (cm) |                      |                      |                      |                      |
|------------------------|--------------------------|----------------------|----------------------|----------------------|----------------------|--------------------------|----------------------|----------------------|----------------------|----------------------|
|                        | Age-standardised         | 5 years              | 10 years             | 15 years             | 19 years             | Age-standardised         | 5 years              | 10 years             | 15 years             | 19 years             |
| rural                  | 142.9 (136.1, 149.7)     | 109.0 (98.6, 119.8)  | 133.9 (127.0, 140.7) | 160.9 (154.1, 167.6) | 168.3 (160.1, 176.7) | 144.3 (137.4, 151.1)     | 111.8 (100.3, 123.3) | 135.5 (128.3, 142.6) | 161.6 (155.2, 168.1) | 168.7 (161.6, 175.9) |
| urban                  | 144.8 (137.9, 151.7)     | 111.3 (100.8, 122.3) | 135.9 (129.1, 142.7) | 162.6 (155.7, 169.5) | 169.7 (161.3, 178.2) | 146.8 (140.1, 153.7)     | 114.8 (103.5, 126.3) | 138.2 (131.2, 145.2) | 164.0 (157.6, 170.6) | 170.8 (163.6, 178.0) |
| urban-rural difference | 1.9 (-0.1, 3.9)          | 2.3 (0.1, 4.7)       | 2.0 (-0.1, 4.1)      | 1.7 (-0.4, 3.7)      | 1.4 (-0.9, 3.7)      | 2.6 (0.6, 4.6)           | 3.0 (0.6, 5.6)       | 2.7 (0.6, 4.9)       | 2.4 (0.6, 4.3)       | 2.1 (0.2, 4.0)       |
| <b>Eritrea</b>         |                          |                      |                      |                      |                      |                          |                      |                      |                      |                      |
| rural                  | 144.0 (140.2, 147.9)     | 110.7 (101.8, 120.2) | 135.3 (131.4, 139.4) | 161.7 (157.8, 165.6) | 168.3 (163.5, 173.0) | 145.4 (140.9, 150.0)     | 112.4 (101.8, 123.4) | 136.6 (131.3, 141.9) | 163.1 (159.5, 166.7) | 170.0 (166.6, 173.3) |
| urban                  | 145.8 (141.9, 149.9)     | 113.0 (103.9, 122.5) | 137.2 (133.2, 141.4) | 163.4 (159.3, 167.4) | 169.7 (164.8, 174.5) | 148.0 (143.2, 152.6)     | 115.3 (104.6, 126.3) | 139.3 (133.8, 144.4) | 165.4 (161.7, 169.0) | 172.1 (168.6, 175.6) |
| urban-rural difference | 1.8 (-0.3, 3.9)          | 2.3 (0.0, 4.6)       | 1.9 (-0.1, 4.0)      | 1.6 (-0.5, 3.7)      | 1.4 (-0.9, 3.6)      | 2.5 (0.5, 4.5)           | 3.0 (0.4, 5.5)       | 2.7 (0.5, 4.8)       | 2.3 (0.4, 4.2)       | 2.1 (0.1, 4.0)       |
| <b>Ethiopia</b>        |                          |                      |                      |                      |                      |                          |                      |                      |                      |                      |
| rural                  | 141.4 (137.6, 145.0)     | 106.7 (97.6, 116.1)  | 131.8 (128.0, 135.5) | 159.7 (155.8, 163.5) | 169.1 (163.7, 174.4) | 142.6 (139.0, 146.3)     | 110.4 (100.1, 121.3) | 133.4 (129.3, 137.7) | 159.7 (157.6, 161.9) | 168.2 (166.3, 170.1) |
| urban                  | 143.5 (139.8, 147.2)     | 109.4 (100.2, 118.9) | 134.0 (130.3, 137.8) | 161.5 (157.8, 165.2) | 170.5 (165.3, 175.9) | 145.6 (141.9, 149.3)     | 114.0 (103.8, 124.8) | 136.6 (132.4, 140.9) | 162.4 (160.2, 164.6) | 170.6 (168.6, 172.5) |
| urban-rural difference | 2.1 (0.5, 3.6)           | 2.7 (0.8, 4.8)       | 2.2 (0.6, 3.9)       | 1.8 (0.2, 3.3)       | 1.4 (-0.3, 3.0)      | 3.0 (1.7, 4.4)           | 3.6 (1.6, 5.9)       | 3.2 (1.6, 4.8)       | 2.7 (1.6, 3.9)       | 2.4 (1.3, 3.4)       |
| <b>Kenya</b>           |                          |                      |                      |                      |                      |                          |                      |                      |                      |                      |
| rural                  | 144.5 (140.3, 148.7)     | 112.1 (103.9, 120.4) | 135.4 (131.2, 139.5) | 162.0 (157.1, 166.9) | 169.7 (163.2, 176.1) | 146.3 (142.3, 150.2)     | 115.6 (106.3, 125.5) | 137.5 (132.8, 142.1) | 163.0 (159.7, 166.3) | 170.1 (167.4, 172.7) |
| urban                  | 146.2 (142.0, 150.4)     | 114.3 (106.3, 122.4) | 137.2 (133.1, 141.3) | 163.4 (158.4, 168.4) | 170.8 (164.3, 177.2) | 148.7 (144.9, 152.5)     | 118.6 (109.3, 128.1) | 140.1 (135.6, 144.6) | 165.2 (162.1, 168.4) | 172.0 (169.4, 174.5) |
| urban-rural difference | 1.6 (-0.2, 3.4)          | 2.2 (0.0, 4.4)       | 1.8 (-0.1, 3.7)      | 1.4 (-0.4, 3.2)      | 1.1 (-1.0, 3.1)      | 2.4 (0.6, 4.2)           | 3.0 (0.6, 5.5)       | 2.6 (0.7, 4.5)       | 2.2 (0.6, 3.8)       | 1.9 (0.3, 3.5)       |
| <b>Madagascar</b>      |                          |                      |                      |                      |                      |                          |                      |                      |                      |                      |
| rural                  | 140.1 (135.5, 144.7)     | 106.5 (96.8, 116.4)  | 131.4 (126.4, 136.3) | 158.0 (153.6, 162.6) | 164.6 (159.3, 170.0) | 141.8 (136.5, 147.1)     | 109.3 (98.5, 120.5)  | 133.2 (127.5, 139.1) | 159.2 (154.5, 164.0) | 165.5 (160.8, 170.4) |
| urban                  | 142.0 (137.2, 146.8)     | 108.8 (99.0, 118.7)  | 133.4 (128.2, 138.3) | 159.7 (155.0, 164.4) | 166.0 (160.6, 171.5) | 144.4 (139.0, 149.8)     | 112.4 (101.6, 123.4) | 135.9 (130.0, 141.9) | 161.5 (156.7, 166.3) | 167.6 (162.8, 172.6) |
| urban-rural difference | 1.9 (-0.2, 4.0)          | 2.3 (0.1, 4.7)       | 2.0 (0.0, 4.2)       | 1.7 (-0.4, 3.8)      | 1.4 (-0.8, 3.7)      | 2.6 (0.6, 4.6)           | 3.0 (0.5, 5.6)       | 2.7 (0.6, 4.9)       | 2.4 (0.5, 4.3)       | 2.1 (0.3, 4.0)       |
| <b>Malawi</b>          |                          |                      |                      |                      |                      |                          |                      |                      |                      |                      |
| rural                  | 140.4 (136.2, 144.7)     | 106.5 (97.5, 116.1)  | 131.6 (127.2, 136.0) | 158.4 (154.0, 162.6) | 164.8 (159.2, 170.2) | 142.1 (137.9, 146.3)     | 109.6 (99.2, 120.3)  | 133.6 (128.6, 138.5) | 159.5 (156.3, 162.6) | 165.5 (163.4, 167.6) |
| urban                  | 142.0 (137.8, 146.3)     | 108.7 (99.3, 118.3)  | 133.4 (129.0, 137.9) | 159.8 (155.3, 164.0) | 165.9 (160.2, 171.3) | 144.3 (140.0, 148.6)     | 112.4 (101.8, 123.1) | 136.0 (130.9, 141.1) | 161.5 (158.2, 164.7) | 167.2 (165.1, 169.3) |
| urban-rural difference | 1.6 (-0.1, 3.3)          | 2.1 (0.1, 4.3)       | 1.8 (0.0, 3.5)       | 1.4 (-0.3, 3.1)      | 1.1 (-0.7, 2.9)      | 2.3 (0.6, 3.9)           | 2.8 (0.4, 5.1)       | 2.4 (0.6, 4.3)       | 2.0 (0.5, 3.5)       | 1.7 (0.3, 3.1)       |
| <b>Mauritius</b>       |                          |                      |                      |                      |                      |                          |                      |                      |                      |                      |
| rural                  | 148.9 (145.8, 152.0)     | 117.1 (108.7, 126.2) | 141.0 (137.7, 144.4) | 166.1 (163.3, 168.7) | 170.4 (167.9, 172.9) | 151.8 (148.9, 154.8)     | 120.0 (110.9, 129.3) | 143.7 (140.5, 147.0) | 169.0 (167.1, 170.9) | 173.7 (171.7, 175.9) |
| urban                  | 150.6 (147.5, 153.7)     | 119.3 (110.8, 128.5) | 142.8 (139.4, 146.3) | 167.6 (164.8, 170.3) | 171.7 (169.2, 174.3) | 154.1 (151.0, 157.2)     | 122.7 (113.5, 132.2) | 146.1 (142.7, 149.6) | 171.1 (169.1, 173.1) | 175.6 (173.5, 177.9) |
| urban-rural difference | 1.7 (0.1, 3.3)           | 2.1 (0.1, 4.3)       | 1.8 (0.1, 3.6)       | 1.5 (-0.1, 3.1)      | 1.3 (-0.4, 3.0)      | 2.3 (0.5, 4.0)           | 2.7 (0.2, 5.1)       | 2.4 (0.4, 4.3)       | 2.1 (0.5, 3.7)       | 1.9 (0.3, 3.4)       |
| <b>Mozambique</b>      |                          |                      |                      |                      |                      |                          |                      |                      |                      |                      |
| rural                  | 142.1 (139.0, 145.1)     | 108.9 (102.2, 115.5) | 133.8 (130.8, 137.0) | 159.8 (156.5, 163.1) | 165.0 (160.8, 169.4) | 142.8 (139.9, 145.6)     | 112.0 (104.7, 119.5) | 135.0 (131.6, 138.3) | 159.4 (157.2, 161.7) | 163.9 (161.5, 166.4) |
| urban                  | 144.9 (141.9, 147.8)     | 112.2 (105.8, 118.8) | 136.8 (133.8, 139.8) | 162.4 (159.2, 165.6) | 167.3 (163.1, 171.6) | 146.3 (143.4, 149.1)     | 116.1 (108.8, 123.4) | 138.7 (135.3, 142.0) | 162.7 (160.4, 164.9) | 166.8 (164.4, 169.3) |
| urban-rural difference | 2.8 (1.2, 4.5)           | 3.4 (1.4, 5.5)       | 3.0 (1.3, 4.7)       | 2.6 (1.0, 4.3)       | 2.3 (0.5, 4.2)       | 3.5 (2.0, 5.1)           | 4.1 (1.9, 6.3)       | 3.7 (2.0, 5.4)       | 3.2 (1.9, 4.6)       | 2.9 (1.6, 4.3)       |
| <b>Rwanda</b>          |                          |                      |                      |                      |                      |                          |                      |                      |                      |                      |
| rural                  | 137.9 (134.0, 141.9)     | 103.0 (93.8, 112.9)  | 127.9 (124.0, 131.7) | 156.2 (152.2, 160.3) | 166.9 (161.3, 172.6) | 138.2 (134.1, 142.4)     | 106.4 (95.7, 117.6)  | 128.7 (124.1, 133.4) | 155.0 (152.6, 157.5) | 164.7 (162.7, 166.8) |
| urban                  | 141.1 (137.1, 145.1)     | 106.8 (97.5, 116.8)  | 131.2 (127.2, 135.2) | 159.1 (154.9, 163.2) | 169.5 (163.8, 175.2) | 142.3 (138.3, 146.6)     | 111.2 (100.3, 122.4) | 133.1 (128.4, 137.8) | 159.0 (156.5, 161.5) | 168.4 (166.2, 170.6) |
| urban-rural difference | 3.2 (1.5, 4.7)           | 3.7 (1.7, 5.8)       | 3.3 (1.6, 5.0)       | 2.9 (1.3, 4.5)       | 2.6 (0.8, 4.3)       | 4.2 (2.7, 5.7)           | 4.7 (2.6, 7.1)       | 4.3 (2.7, 6.1)       | 4.0 (2.7, 5.3)       | 3.6 (2.4, 4.8)       |
| <b>Seychelles</b>      |                          |                      |                      |                      |                      |                          |                      |                      |                      |                      |
| rural                  | 148.9 (147.1, 150.7)     | 110.7 (109.4, 112.0) | 140.4 (138.9, 142.0) | 168.7 (166.2, 171.3) | 173.9 (170.0, 177.7) | 151.1 (150.2, 152.0)     | 114.8 (113.0, 116.6) | 142.8 (141.9, 143.6) | 170.0 (169.1, 170.8) | 175.2 (173.6, 177.0) |
| urban                  | 148.4 (146.6, 150.2)     | 110.0 (108.7, 111.4) | 139.8 (138.3, 141.4) | 168.2 (165.7, 170.8) | 173.5 (169.6, 177.3) | 151.2 (150.3, 152.1)     | 114.7 (112.9, 116.6) | 142.8 (141.9, 143.8) | 170.2 (169.3, 171.0) | 175.4 (173.8, 177.3) |
| urban-rural difference | -0.6 (-1.4, 0.3)         | -0.7 (-1.6, 0.1)     | -0.6 (-1.4, 0.2)     | -0.5 (-1.4, 0.4)     | -0.4 (-1.4, 0.6)     | 0.1 (-0.5, 0.7)          | 0.0 (-0.7, 0.7)      | 0.1 (-0.5, 0.6)      | 0.2 (-0.5, 0.8)      | 0.2 (-0.5, 1.0)      |
| <b>Somalia</b>         |                          |                      |                      |                      |                      |                          |                      |                      |                      |                      |
| rural                  | 144.0 (138.5, 149.6)     | 110.1 (100.0, 120.2) | 135.0 (129.4, 140.6) | 162.0 (156.3, 167.8) | 169.5 (162.4, 176.6) | 145.4 (139.9, 151.0)     | 112.6 (101.3, 123.8) | 136.5 (130.4, 142.6) | 162.8 (158.2, 167.6) | 170.3 (165.6, 175.0) |
| urban                  | 145.9 (140.5, 151.4)     | 112.5 (102.5, 122.5) | 137.0 (131.5, 142.4) | 163.7 (158.0, 169.3) | 171.0 (164.0, 178.0) | 148.0 (142.6, 153.6)     | 115.6 (104.4, 127.0) | 139.2 (133.2, 145.4) | 165.2 (160.6, 170.0) | 172.4 (168.1, 176.9) |
| urban-rural difference | 1.9 (-0.1, 3.9)          | 2.4 (0.1, 4.7)       | 2.0 (0.0, 4.1)       | 1.7 (-0.3, 3.8)      | 1.4 (-0.8, 3.7)      | 2.6 (0.6, 4.6)           | 3.1 (0.5, 5.6)       | 2.7 (0.6, 4.9)       | 2.4 (0.5, 4.3)       | 2.2 (0.2, 4.0)       |
| <b>South Sudan</b>     |                          |                      |                      |                      |                      |                          |                      |                      |                      |                      |
| rural                  | 145.2 (139.7, 150.8)     | 111.6 (101.6, 121.8) | 136.1 (130.6, 141.7) | 163.0 (157.2, 168.9) | 170.8 (163.7, 177.9) | 146.5 (141.0, 151.8)     | 113.6 (102.4, 124.9) | 137.5 (131.4, 143.5) | 164.0 (159.2, 168.7) | 171.9 (167.5, 176.3) |
| urban                  | 147.2 (141.8, 152.7)     | 114.0 (104.2, 124.5) | 138.2 (132.8, 143.6) | 164.8 (159.2, 170.5) | 172.3 (165.4, 179.3) | 149.2 (143.7, 154.5)     | 116.7 (105.5, 128.0) | 140.2 (134.2, 146.3) | 166.5 (161.9, 171.0) | 174.1 (170.0, 178.2) |
| urban-rural difference | 2.0 (0.0, 3.9)           | 2.4 (0.2, 4.8)       | 2.1 (0.1, 4.1)       | 1.8 (-0.2, 3.8)      | 1.5 (-0.7, 3.8)      | 2.7 (0.7, 4.7)           | 3.1 (0.6, 5.7)       | 2.8 (0.7, 4.9)       | 2.5 (0.6, 4.4)       | 2.2 (0.3, 4.2)       |
| <b>Sudan</b>           |                          |                      |                      |                      |                      |                          |                      |                      |                      |                      |
| rural                  | 145.2 (140.9, 149.3)     | 110.9 (101.8, 120.5) | 135.9 (131.2, 140.4) | 163.3 (159.0, 167.4) | 171.7 (167.1, 176.0) | 145.9 (141.5, 150.4)     | 113.6 (103.2, 124.3) | 137.0 (131.7, 142.3) | 163.1 (159.7, 166.6) | 171.0 (168.5, 173.5) |
| urban                  | 147.0 (142.7, 151.2)     | 113.2 (103.8, 122.8) | 137.8 (133.1, 142.4) | 164.9 (160.7, 169.1) | 173.0 (168.3, 177.6) | 148.4 (143.9, 152.8)     | 116.5 (105.9, 127.4) | 139.6 (134.3, 144.7) | 165.4 (161.9, 168.9) | 173.0 (170.5, 175.5) |
| urban-rural difference | 1.8 (0.0, 3.7)           | 2.3 (0.2, 4.5)       | 1.9 (0.1, 3.8)       | 1.6 (-0.2, 3.5)      | 1.3 (-0.7, 3.4)      | 2.5 (0.7, 4.3)           | 3.0 (0.5, 5.4)       | 2.6 (0.7, 4.6)       | 2.3 (0.7, 4.0)       | 2.0 (0.5, 3.6)       |



| Boys                   | Mean height in 1990 (cm) |                      |                      |                      |                      | Mean height in 2020 (cm) |                      |                      |                      |                      |
|------------------------|--------------------------|----------------------|----------------------|----------------------|----------------------|--------------------------|----------------------|----------------------|----------------------|----------------------|
|                        | Age-standardised         | 5 years              | 10 years             | 15 years             | 19 years             | Age-standardised         | 5 years              | 10 years             | 15 years             | 19 years             |
| <b>Tanzania</b>        |                          |                      |                      |                      |                      |                          |                      |                      |                      |                      |
| rural                  | 139.5 (136.4, 142.7)     | 107.4 (101.2, 113.7) | 130.6 (127.2, 134.0) | 156.7 (153.0, 160.3) | 164.4 (160.3, 168.6) | 141.1 (137.6, 144.5)     | 109.5 (102.3, 116.8) | 131.9 (127.9, 135.9) | 158.1 (154.8, 161.4) | 166.2 (163.1, 169.4) |
| urban                  | 141.2 (138.0, 144.4)     | 109.7 (103.3, 116.2) | 132.4 (129.0, 136.0) | 158.2 (154.7, 161.7) | 165.6 (161.6, 169.4) | 143.6 (139.9, 147.2)     | 112.6 (105.3, 120.2) | 134.6 (130.3, 138.9) | 160.4 (156.8, 163.9) | 168.2 (164.8, 171.5) |
| urban-rural difference | 1.7 (-0.3, 3.7)          | 2.3 (0.1, 4.6)       | 1.9 (-0.1, 3.9)      | 1.5 (-0.5, 3.5)      | 1.2 (-1.0, 3.5)      | 2.5 (0.6, 4.5)           | 3.1 (0.5, 5.5)       | 2.7 (0.6, 4.7)       | 2.3 (0.4, 4.2)       | 2.0 (0.1, 3.9)       |
| <b>Uganda</b>          |                          |                      |                      |                      |                      |                          |                      |                      |                      |                      |
| rural                  | 139.7 (137.0, 142.3)     | 102.9 (99.3, 106.4)  | 129.7 (127.0, 132.2) | 158.9 (155.5, 162.2) | 168.6 (163.9, 173.3) | 140.4 (138.1, 142.7)     | 106.1 (101.8, 110.3) | 130.9 (128.0, 133.8) | 158.6 (156.6, 160.5) | 167.5 (165.8, 169.2) |
| urban                  | 141.5 (138.8, 144.2)     | 105.7 (101.9, 109.7) | 131.8 (129.0, 134.5) | 160.3 (157.0, 163.7) | 169.5 (164.9, 174.2) | 143.4 (140.9, 145.9)     | 109.9 (105.3, 114.5) | 134.1 (131.0, 137.4) | 161.1 (159.0, 163.2) | 169.5 (167.7, 171.2) |
| urban-rural difference | 1.9 (0.3, 3.3)           | 2.8 (0.9, 5.0)       | 2.1 (0.6, 3.8)       | 1.4 (0.0, 2.8)       | 0.9 (-0.7, 2.4)      | 2.9 (1.6, 4.4)           | 3.9 (1.8, 6.2)       | 3.2 (1.7, 4.9)       | 2.5 (1.4, 3.7)       | 2.0 (1.0, 3.0)       |
| <b>Zambia</b>          |                          |                      |                      |                      |                      |                          |                      |                      |                      |                      |
| rural                  | 141.7 (137.1, 146.4)     | 107.5 (98.1, 117.2)  | 132.7 (127.8, 137.6) | 159.8 (155.1, 164.7) | 167.3 (161.4, 173.1) | 142.7 (138.4, 147.2)     | 110.6 (99.9, 121.5)  | 134.1 (129.0, 139.4) | 159.9 (156.5, 163.3) | 166.8 (164.2, 169.3) |
| urban                  | 143.8 (139.3, 148.3)     | 110.1 (100.6, 119.8) | 134.9 (130.2, 139.6) | 161.7 (157.0, 166.4) | 169.0 (163.3, 174.6) | 145.6 (141.1, 150.0)     | 113.9 (103.1, 124.9) | 137.0 (131.9, 142.2) | 162.5 (159.2, 165.9) | 169.2 (166.8, 171.7) |
| urban-rural difference | 2.1 (0.3, 3.9)           | 2.5 (0.4, 4.6)       | 2.2 (0.3, 4.0)       | 1.9 (0.0, 3.8)       | 1.7 (-0.4, 3.7)      | 2.8 (1.1, 4.5)           | 3.2 (0.9, 5.6)       | 2.9 (1.1, 4.8)       | 2.6 (1.1, 4.2)       | 2.4 (0.9, 3.9)       |
| <b>Southern Africa</b> |                          |                      |                      |                      |                      |                          |                      |                      |                      |                      |
| <b>Botswana</b>        |                          |                      |                      |                      |                      |                          |                      |                      |                      |                      |
| rural                  | 146.6 (142.4, 150.8)     | 111.5 (101.6, 121.7) | 137.6 (133.2, 141.8) | 164.5 (160.3, 168.7) | 173.1 (167.8, 178.4) | 145.8 (141.2, 150.1)     | 112.3 (101.1, 123.7) | 137.1 (131.9, 142.1) | 163.0 (159.7, 166.1) | 170.9 (168.0, 173.8) |
| urban                  | 148.8 (144.8, 152.9)     | 114.0 (104.2, 124.0) | 139.8 (135.6, 144.2) | 166.6 (162.5, 170.6) | 175.0 (169.8, 180.3) | 148.0 (143.6, 152.3)     | 114.8 (103.5, 126.1) | 139.4 (134.3, 144.4) | 165.1 (162.0, 168.2) | 172.8 (170.1, 175.7) |
| urban-rural difference | 2.2 (0.1, 4.3)           | 2.5 (0.2, 4.8)       | 2.3 (0.2, 4.4)       | 2.1 (-0.1, 4.2)      | 1.9 (-0.5, 4.2)      | 2.2 (0.3, 4.3)           | 2.5 (0.1, 5.1)       | 2.3 (0.3, 4.5)       | 2.1 (0.3, 4.1)       | 2.0 (0.1, 3.9)       |
| <b>Lesotho</b>         |                          |                      |                      |                      |                      |                          |                      |                      |                      |                      |
| rural                  | 142.3 (138.1, 146.5)     | 107.5 (97.6, 117.9)  | 133.3 (129.2, 137.3) | 160.0 (155.6, 164.4) | 168.5 (162.7, 174.4) | 141.8 (137.5, 146.2)     | 108.2 (96.9, 119.9)  | 133.0 (128.1, 138.0) | 159.1 (156.4, 161.7) | 167.1 (164.8, 169.4) |
| urban                  | 144.5 (140.1, 148.7)     | 110.2 (100.2, 120.7) | 135.6 (131.4, 139.7) | 162.1 (157.7, 166.3) | 170.3 (164.4, 176.2) | 144.2 (139.8, 148.5)     | 111.0 (99.7, 122.4)  | 135.5 (130.4, 140.4) | 161.3 (158.5, 164.0) | 169.1 (166.6, 171.4) |
| urban-rural difference | 2.2 (0.5, 3.8)           | 2.6 (0.6, 4.7)       | 2.3 (0.6, 4.0)       | 2.0 (0.4, 3.6)       | 1.8 (-0.1, 3.5)      | 2.4 (0.9, 3.9)           | 2.8 (0.6, 5.1)       | 2.5 (0.8, 4.2)       | 2.2 (0.9, 3.5)       | 2.0 (0.8, 3.2)       |
| <b>Namibia</b>         |                          |                      |                      |                      |                      |                          |                      |                      |                      |                      |
| rural                  | 143.5 (139.5, 147.5)     | 108.8 (98.7, 119.2)  | 134.2 (130.2, 138.5) | 161.2 (157.5, 165.0) | 170.6 (166.0, 175.3) | 142.9 (138.2, 147.6)     | 110.0 (98.7, 121.4)  | 134.0 (128.8, 139.2) | 159.8 (156.1, 163.5) | 168.3 (164.5, 172.2) |
| urban                  | 145.6 (141.6, 149.7)     | 111.2 (101.1, 121.5) | 136.4 (132.3, 140.6) | 163.2 (159.4, 167.1) | 172.4 (167.7, 177.2) | 145.0 (140.4, 149.6)     | 112.4 (101.3, 123.7) | 136.2 (131.1, 141.3) | 161.8 (158.2, 165.5) | 170.2 (166.5, 174.0) |
| urban-rural difference | 2.1 (0.1, 4.2)           | 2.4 (0.1, 4.7)       | 2.2 (0.1, 4.3)       | 2.0 (-0.1, 4.1)      | 1.9 (-0.4, 4.2)      | 2.2 (0.1, 4.1)           | 2.4 (-0.2, 4.9)      | 2.2 (0.1, 4.3)       | 2.0 (0.1, 3.9)       | 1.9 (0.0, 3.8)       |
| <b>South Africa</b>    |                          |                      |                      |                      |                      |                          |                      |                      |                      |                      |
| rural                  | 143.1 (141.7, 144.6)     | 109.9 (108.3, 111.5) | 134.7 (133.3, 136.2) | 160.3 (158.5, 161.9) | 167.4 (165.1, 169.6) | 142.2 (141.0, 143.4)     | 107.2 (105.2, 109.3) | 133.2 (131.9, 134.5) | 160.1 (159.0, 161.3) | 168.3 (167.0, 169.6) |
| urban                  | 145.1 (143.6, 146.7)     | 111.5 (109.7, 113.3) | 136.6 (135.0, 138.3) | 162.4 (160.6, 164.2) | 169.7 (167.4, 171.9) | 143.7 (142.6, 144.9)     | 108.3 (106.3, 110.3) | 134.6 (133.3, 135.8) | 161.8 (160.7, 162.9) | 170.2 (168.9, 171.4) |
| urban-rural difference | 2.0 (0.9, 3.1)           | 1.6 (0.3, 2.9)       | 1.9 (0.7, 3.0)       | 2.1 (1.0, 3.3)       | 2.4 (1.2, 3.5)       | 1.5 (0.8, 2.2)           | 1.1 (0.2, 2.0)       | 1.4 (0.7, 2.1)       | 1.6 (1.0, 2.4)       | 1.9 (1.1, 2.7)       |
| <b>Eswatini</b>        |                          |                      |                      |                      |                      |                          |                      |                      |                      |                      |
| rural                  | 144.5 (140.4, 148.7)     | 109.8 (99.4, 120.3)  | 135.7 (131.6, 139.7) | 162.3 (158.1, 166.5) | 170.1 (164.9, 175.3) | 144.1 (139.5, 148.8)     | 110.4 (98.5, 122.4)  | 135.5 (130.2, 140.7) | 161.5 (158.5, 164.5) | 168.8 (166.3, 171.4) |
| urban                  | 147.1 (142.9, 151.5)     | 112.7 (102.3, 123.2) | 138.4 (134.3, 142.6) | 164.8 (160.5, 168.9) | 172.4 (167.0, 177.6) | 146.9 (142.3, 151.4)     | 113.4 (101.7, 125.4) | 138.3 (133.1, 143.6) | 164.1 (161.0, 167.2) | 171.3 (168.7, 174.0) |
| urban-rural difference | 2.6 (1.0, 4.3)           | 2.9 (0.9, 5.0)       | 2.7 (1.0, 4.4)       | 2.5 (0.8, 4.1)       | 2.3 (0.5, 4.1)       | 2.7 (1.1, 4.5)           | 3.1 (0.7, 5.6)       | 2.8 (1.0, 4.8)       | 2.6 (1.1, 4.2)       | 2.4 (1.0, 3.9)       |
| <b>Zimbabwe</b>        |                          |                      |                      |                      |                      |                          |                      |                      |                      |                      |
| rural                  | 144.2 (140.0, 148.6)     | 109.0 (99.0, 119.3)  | 134.9 (130.9, 139.0) | 162.1 (157.8, 166.6) | 171.5 (165.4, 177.7) | 143.2 (139.1, 147.5)     | 109.4 (98.1, 120.7)  | 134.1 (129.4, 138.9) | 160.6 (158.1, 163.0) | 169.5 (167.1, 171.7) |
| urban                  | 146.5 (142.3, 150.8)     | 111.8 (101.9, 122.1) | 137.4 (133.2, 141.5) | 164.2 (159.9, 168.7) | 173.3 (167.3, 179.6) | 145.9 (141.7, 150.1)     | 112.5 (101.2, 124.0) | 137.0 (132.3, 141.7) | 163.1 (160.5, 165.5) | 171.7 (169.4, 174.0) |
| urban-rural difference | 2.3 (0.7, 3.9)           | 2.8 (0.8, 4.9)       | 2.5 (0.8, 4.1)       | 2.1 (0.4, 3.6)       | 1.8 (0.0, 3.5)       | 2.7 (1.3, 4.1)           | 3.2 (1.0, 5.5)       | 2.8 (1.3, 4.5)       | 2.5 (1.3, 3.7)       | 2.2 (1.1, 3.3)       |
| <b>West Africa</b>     |                          |                      |                      |                      |                      |                          |                      |                      |                      |                      |
| <b>Benin</b>           |                          |                      |                      |                      |                      |                          |                      |                      |                      |                      |
| rural                  | 143.2 (138.9, 147.6)     | 106.9 (97.2, 116.5)  | 134.2 (129.6, 138.8) | 161.5 (157.4, 165.8) | 170.5 (165.4, 175.9) | 142.9 (138.0, 147.5)     | 109.4 (98.1, 120.2)  | 134.6 (129.0, 140.2) | 160.0 (156.2, 163.6) | 167.5 (164.8, 170.2) |
| urban                  | 145.2 (141.0, 149.4)     | 109.3 (99.5, 118.8)  | 136.3 (131.7, 140.8) | 163.3 (159.2, 167.6) | 172.0 (167.0, 177.3) | 144.8 (139.9, 149.6)     | 111.7 (100.5, 122.5) | 136.7 (131.0, 142.2) | 161.7 (158.0, 165.4) | 169.0 (166.4, 171.7) |
| urban-rural difference | 1.9 (0.0, 3.9)           | 2.4 (0.1, 4.7)       | 2.1 (0.1, 4.0)       | 1.8 (-0.2, 3.7)      | 1.5 (-0.6, 3.6)      | 2.0 (0.1, 3.8)           | 2.4 (0.0, 5.0)       | 2.1 (0.2, 4.1)       | 1.8 (0.1, 3.4)       | 1.5 (-0.1, 3.2)      |
| <b>Burkina Faso</b>    |                          |                      |                      |                      |                      |                          |                      |                      |                      |                      |
| rural                  | 143.9 (140.3, 147.5)     | 105.1 (101.1, 109.0) | 134.5 (130.8, 138.2) | 162.9 (158.7, 167.0) | 174.0 (169.4, 178.4) | 143.6 (139.4, 147.9)     | 108.0 (101.1, 115.0) | 135.1 (130.3, 140.2) | 161.1 (157.3, 165.0) | 170.4 (167.0, 173.7) |
| urban                  | 146.1 (142.2, 149.9)     | 107.7 (103.3, 112.1) | 136.8 (132.8, 140.8) | 164.9 (160.6, 169.2) | 175.8 (170.8, 180.7) | 145.8 (141.4, 150.2)     | 110.7 (103.4, 117.9) | 137.5 (132.4, 142.6) | 163.1 (159.2, 167.2) | 172.2 (168.7, 175.9) |
| urban-rural difference | 2.2 (0.1, 4.2)           | 2.6 (0.3, 5.0)       | 2.3 (0.2, 4.4)       | 2.0 (-0.1, 4.1)      | 1.7 (-0.6, 4.0)      | 2.3 (0.3, 4.2)           | 2.7 (0.2, 5.2)       | 2.4 (0.3, 4.5)       | 2.1 (0.2, 3.9)       | 1.8 (-0.1, 3.7)      |
| <b>Cabo Verde</b>      |                          |                      |                      |                      |                      |                          |                      |                      |                      |                      |
| rural                  | 147.5 (143.3, 151.6)     | 112.2 (102.7, 121.8) | 138.4 (133.8, 142.9) | 165.2 (161.0, 169.4) | 175.0 (169.7, 180.0) | 147.9 (143.3, 152.4)     | 113.0 (102.2, 123.6) | 139.0 (133.4, 144.2) | 165.6 (162.1, 169.0) | 175.1 (172.9, 177.5) |
| urban                  | 149.4 (145.4, 153.6)     | 114.6 (105.2, 124.1) | 140.5 (136.0, 145.0) | 167.0 (162.9, 171.1) | 176.5 (171.3, 181.4) | 150.0 (145.4, 154.5)     | 115.4 (104.5, 126.2) | 141.1 (135.6, 146.5) | 167.4 (164.0, 170.9) | 176.7 (174.5, 179.1) |
| urban-rural difference | 2.0 (0.1, 3.8)           | 2.4 (0.2, 4.7)       | 2.1 (0.2, 4.0)       | 1.8 (0.0, 3.6)       | 1.5 (-0.5, 3.6)      | 2.0 (0.3, 3.8)           | 2.4 (0.0, 5.0)       | 2.1 (0.2, 4.1)       | 1.8 (0.2, 3.4)       | 1.6 (0.0, 3.1)       |
| <b>Cameroon</b>        |                          |                      |                      |                      |                      |                          |                      |                      |                      |                      |

| Boys                         | Mean height in 1990 (cm) |                      |                      |                      |                      | Mean height in 2020 (cm) |                      |                      |                      |                      |
|------------------------------|--------------------------|----------------------|----------------------|----------------------|----------------------|--------------------------|----------------------|----------------------|----------------------|----------------------|
|                              | Age-standardised         | 5 years              | 10 years             | 15 years             | 19 years             | Age-standardised         | 5 years              | 10 years             | 15 years             | 19 years             |
| rural                        | 142.8 (139.0, 146.5)     | 107.2 (97.8, 116.7)  | 133.5 (129.5, 137.6) | 160.7 (157.3, 164.2) | 171.1 (167.7, 174.5) | 143.5 (138.9, 148.0)     | 108.8 (98.1, 119.5)  | 134.6 (129.2, 139.7) | 161.0 (157.5, 164.4) | 170.7 (167.8, 173.4) |
| urban                        | 145.5 (142.0, 149.2)     | 110.4 (100.9, 120.0) | 136.4 (132.5, 140.3) | 163.3 (160.0, 166.6) | 173.4 (170.2, 176.7) | 146.2 (141.7, 150.7)     | 111.9 (101.2, 122.7) | 137.4 (132.2, 142.5) | 163.5 (160.0, 167.0) | 173.0 (170.2, 175.6) |
| urban-rural difference       | 2.7 (1.0, 4.5)           | 3.2 (1.1, 5.4)       | 2.9 (1.1, 4.7)       | 2.6 (0.9, 4.2)       | 2.3 (0.5, 4.1)       | 2.7 (0.9, 4.5)           | 3.1 (0.6, 5.7)       | 2.8 (0.9, 4.9)       | 2.5 (0.9, 4.2)       | 2.3 (0.8, 3.9)       |
| <b>Chad</b>                  |                          |                      |                      |                      |                      |                          |                      |                      |                      |                      |
| rural                        | 145.0 (140.0, 149.9)     | 109.2 (99.3, 119.1)  | 135.9 (130.7, 141.0) | 163.0 (157.9, 168.1) | 172.8 (166.6, 179.1) | 144.9 (139.4, 150.3)     | 110.7 (99.7, 121.4)  | 136.2 (130.1, 142.0) | 162.2 (157.1, 167.0) | 171.1 (166.2, 176.1) |
| urban                        | 147.2 (142.3, 152.1)     | 111.7 (102.2, 121.7) | 138.2 (133.2, 143.3) | 165.0 (160.1, 170.0) | 174.6 (168.6, 180.8) | 147.1 (141.7, 152.5)     | 113.3 (102.4, 124.1) | 138.6 (132.7, 144.5) | 164.3 (159.4, 169.1) | 173.0 (168.1, 177.9) |
| urban-rural difference       | 2.2 (0.1, 4.3)           | 2.6 (0.3, 5.0)       | 2.3 (0.2, 4.5)       | 2.1 (-0.1, 4.2)      | 1.8 (-0.5, 4.2)      | 2.3 (0.2, 4.3)           | 2.7 (0.0, 5.2)       | 2.4 (0.2, 4.5)       | 2.1 (0.2, 4.0)       | 1.9 (0.0, 3.8)       |
| <b>Côte d'Ivoire</b>         |                          |                      |                      |                      |                      |                          |                      |                      |                      |                      |
| rural                        | 143.6 (139.0, 148.0)     | 108.3 (98.5, 117.9)  | 135.1 (130.4, 139.9) | 161.5 (156.9, 166.1) | 169.0 (163.9, 174.2) | 143.9 (138.8, 149.0)     | 109.6 (98.6, 120.4)  | 135.7 (129.9, 141.4) | 161.4 (157.2, 165.9) | 168.4 (164.2, 172.7) |
| urban                        | 146.0 (141.5, 150.7)     | 111.2 (101.5, 120.6) | 137.7 (133.1, 142.5) | 163.8 (159.3, 168.4) | 171.0 (165.8, 176.2) | 146.4 (141.2, 151.7)     | 112.5 (101.5, 123.3) | 138.4 (132.6, 144.2) | 163.8 (159.5, 168.2) | 170.5 (166.2, 174.8) |
| urban-rural difference       | 2.4 (0.6, 4.3)           | 2.8 (0.7, 5.1)       | 2.6 (0.7, 4.4)       | 2.3 (0.4, 4.1)       | 2.0 (0.0, 4.0)       | 2.5 (0.7, 4.4)           | 2.9 (0.5, 5.5)       | 2.6 (0.6, 4.7)       | 2.4 (0.6, 4.1)       | 2.1 (0.4, 3.8)       |
| <b>Gambia</b>                |                          |                      |                      |                      |                      |                          |                      |                      |                      |                      |
| rural                        | 141.6 (136.9, 146.2)     | 105.9 (96.0, 115.7)  | 132.7 (127.8, 137.6) | 159.6 (154.6, 164.4) | 168.6 (162.4, 174.7) | 141.9 (136.6, 147.1)     | 107.9 (96.3, 119.2)  | 133.5 (127.6, 139.4) | 159.1 (154.6, 163.7) | 167.1 (162.8, 171.2) |
| urban                        | 143.7 (138.9, 148.3)     | 108.4 (98.6, 118.1)  | 134.9 (130.0, 139.8) | 161.6 (156.5, 166.4) | 170.3 (164.3, 176.3) | 144.1 (138.6, 149.5)     | 110.5 (98.7, 121.8)  | 135.8 (129.8, 141.9) | 161.2 (156.6, 165.7) | 168.9 (164.5, 173.1) |
| urban-rural difference       | 2.1 (0.0, 4.2)           | 2.5 (0.2, 4.9)       | 2.2 (0.1, 4.3)       | 2.0 (-0.2, 4.1)      | 1.7 (-0.6, 4.0)      | 2.2 (0.1, 4.2)           | 2.6 (0.0, 5.3)       | 2.3 (0.1, 4.4)       | 2.0 (0.1, 4.0)       | 1.8 (-0.1, 3.8)      |
| <b>Ghana</b>                 |                          |                      |                      |                      |                      |                          |                      |                      |                      |                      |
| rural                        | 145.1 (142.1, 148.1)     | 109.6 (104.8, 114.4) | 136.7 (133.8, 139.9) | 163.2 (159.4, 166.9) | 170.0 (164.7, 175.4) | 144.1 (142.4, 145.7)     | 110.9 (108.2, 113.5) | 136.2 (134.3, 138.2) | 161.2 (159.6, 162.8) | 167.2 (165.4, 168.9) |
| urban                        | 146.7 (143.7, 149.8)     | 111.7 (106.9, 116.5) | 138.5 (135.5, 141.6) | 164.6 (161.0, 168.2) | 171.2 (165.9, 176.6) | 145.9 (144.2, 147.5)     | 113.1 (110.4, 115.9) | 138.2 (136.1, 140.2) | 162.8 (161.2, 164.4) | 168.5 (166.8, 170.2) |
| urban-rural difference       | 1.6 (0.0, 3.3)           | 2.1 (0.3, 4.0)       | 1.8 (0.1, 3.4)       | 1.4 (-0.2, 3.1)      | 1.2 (-0.6, 2.9)      | 1.8 (0.8, 2.8)           | 2.3 (0.7, 3.9)       | 1.9 (0.8, 3.1)       | 1.6 (0.7, 2.5)       | 1.3 (0.4, 2.3)       |
| <b>Guinea</b>                |                          |                      |                      |                      |                      |                          |                      |                      |                      |                      |
| rural                        | 144.5 (139.5, 149.5)     | 107.9 (97.0, 118.6)  | 134.5 (127.6, 141.3) | 161.4 (154.6, 168.3) | 170.9 (162.4, 179.3) | 144.4 (139.1, 149.5)     | 109.5 (97.9, 120.9)  | 135.0 (128.0, 142.1) | 160.9 (154.6, 167.2) | 169.5 (162.3, 176.5) |
| urban                        | 146.6 (141.5, 151.6)     | 110.4 (99.3, 121.4)  | 136.8 (130.0, 143.6) | 163.4 (156.7, 170.3) | 172.6 (164.2, 181.0) | 146.6 (141.4, 151.9)     | 112.1 (100.2, 123.5) | 137.4 (130.4, 144.4) | 162.9 (156.6, 169.3) | 171.3 (164.1, 178.4) |
| urban-rural difference       | 2.1 (0.1, 4.3)           | 2.6 (0.4, 4.9)       | 2.3 (0.3, 4.4)       | 2.0 (-0.1, 4.2)      | 1.8 (-0.5, 4.1)      | 2.2 (0.3, 4.2)           | 2.6 (0.1, 5.2)       | 2.3 (0.3, 4.5)       | 2.1 (0.2, 4.0)       | 1.8 (-0.1, 3.7)      |
| <b>Guinea Bissau</b>         |                          |                      |                      |                      |                      |                          |                      |                      |                      |                      |
| rural                        | 143.5 (136.7, 150.3)     | 108.6 (98.7, 118.3)  | 135.5 (130.6, 140.5) | 162.5 (157.4, 167.7) | 171.7 (165.2, 178.2) | 143.6 (136.9, 150.4)     | 110.2 (99.0, 121.1)  | 135.9 (130.2, 141.7) | 161.7 (157.4, 165.9) | 169.9 (165.7, 174.1) |
| urban                        | 145.7 (138.9, 152.5)     | 111.1 (101.1, 120.8) | 137.8 (132.7, 142.9) | 164.5 (159.3, 169.7) | 173.4 (166.8, 180.1) | 145.8 (139.2, 152.6)     | 112.8 (101.3, 123.7) | 138.3 (132.4, 144.2) | 163.8 (159.5, 168.0) | 171.8 (167.5, 176.1) |
| urban-rural difference       | 2.2 (0.2, 4.3)           | 2.5 (0.2, 4.9)       | 2.3 (0.1, 4.4)       | 2.0 (-0.2, 4.1)      | 1.8 (-0.6, 4.1)      | 2.2 (0.3, 4.2)           | 2.6 (0.1, 5.2)       | 2.3 (0.2, 4.5)       | 2.0 (0.2, 3.9)       | 1.8 (0.0, 3.7)       |
| <b>Liberia</b>               |                          |                      |                      |                      |                      |                          |                      |                      |                      |                      |
| rural                        | 138.5 (134.2, 142.9)     | 102.9 (93.4, 112.4)  | 129.4 (125.2, 133.6) | 156.5 (152.1, 161.0) | 166.5 (160.6, 172.6) | 138.5 (134.3, 142.8)     | 104.6 (93.9, 115.1)  | 129.8 (124.9, 134.8) | 155.6 (152.7, 158.5) | 164.7 (162.1, 167.4) |
| urban                        | 140.4 (136.0, 144.8)     | 105.2 (95.8, 114.7)  | 131.3 (127.0, 135.6) | 158.1 (153.7, 162.7) | 167.9 (162.0, 174.0) | 140.4 (136.3, 144.7)     | 107.0 (96.4, 117.8)  | 131.8 (127.0, 136.9) | 157.3 (154.3, 160.3) | 166.1 (163.6, 168.7) |
| urban-rural difference       | 1.8 (0.1, 3.5)           | 2.3 (0.2, 4.5)       | 2.0 (0.2, 3.7)       | 1.6 (-0.2, 3.4)      | 1.4 (-0.7, 3.3)      | 1.9 (0.3, 3.5)           | 2.4 (0.0, 4.8)       | 2.0 (0.3, 3.9)       | 1.7 (0.3, 3.1)       | 1.4 (0.1, 2.8)       |
| <b>Mali</b>                  |                          |                      |                      |                      |                      |                          |                      |                      |                      |                      |
| rural                        | 147.2 (143.3, 151.2)     | 110.9 (101.5, 120.3) | 137.8 (133.7, 142.0) | 165.5 (161.9, 169.2) | 175.7 (172.1, 179.5) | 147.7 (143.1, 152.3)     | 113.4 (102.6, 124.4) | 139.0 (133.8, 144.2) | 165.0 (161.6, 168.5) | 173.7 (170.4, 177.1) |
| urban                        | 149.6 (145.4, 153.7)     | 113.6 (104.0, 122.9) | 140.3 (135.9, 144.6) | 167.8 (163.9, 171.6) | 177.7 (173.6, 181.7) | 150.1 (145.5, 154.8)     | 116.2 (105.5, 127.2) | 141.6 (136.3, 146.9) | 167.3 (163.7, 170.9) | 175.8 (172.4, 179.1) |
| urban-rural difference       | 2.4 (0.4, 4.3)           | 2.7 (0.5, 5.0)       | 2.5 (0.5, 4.5)       | 2.2 (0.2, 4.2)       | 2.0 (-0.2, 4.2)      | 2.4 (0.6, 4.4)           | 2.8 (0.3, 5.4)       | 2.5 (0.5, 4.6)       | 2.3 (0.6, 4.0)       | 2.1 (0.4, 3.8)       |
| <b>Mauritania</b>            |                          |                      |                      |                      |                      |                          |                      |                      |                      |                      |
| rural                        | 141.6 (136.6, 146.7)     | 105.5 (95.8, 115.5)  | 132.8 (127.7, 138.0) | 159.9 (154.8, 165.0) | 168.6 (162.3, 174.7) | 141.8 (136.2, 147.1)     | 108.2 (97.3, 119.4)  | 133.6 (127.6, 139.6) | 158.9 (154.3, 163.4) | 166.1 (161.5, 170.7) |
| urban                        | 143.7 (138.9, 148.7)     | 108.0 (98.2, 118.0)  | 135.0 (130.2, 140.1) | 161.8 (156.9, 166.7) | 170.3 (164.3, 176.0) | 143.9 (138.6, 149.3)     | 110.8 (100.0, 122.0) | 135.9 (130.0, 141.9) | 160.8 (156.4, 165.2) | 167.8 (163.4, 172.3) |
| urban-rural difference       | 2.1 (0.1, 4.1)           | 2.5 (0.2, 4.9)       | 2.2 (0.1, 4.3)       | 1.9 (-0.1, 4.0)      | 1.7 (-0.6, 4.0)      | 2.2 (0.1, 4.2)           | 2.6 (0.0, 5.1)       | 2.3 (0.1, 4.4)       | 2.0 (0.1, 3.8)       | 1.7 (-0.2, 3.6)      |
| <b>Niger</b>                 |                          |                      |                      |                      |                      |                          |                      |                      |                      |                      |
| rural                        | 142.9 (138.5, 147.1)     | 107.1 (97.7, 116.6)  | 133.7 (129.3, 137.9) | 160.9 (156.3, 165.3) | 171.0 (165.4, 176.7) | 142.9 (138.1, 147.7)     | 108.9 (97.8, 119.7)  | 134.2 (128.7, 139.6) | 160.1 (156.4, 163.9) | 169.4 (166.0, 172.8) |
| urban                        | 145.0 (140.6, 149.5)     | 109.7 (100.2, 119.2) | 136.0 (131.4, 140.4) | 162.9 (158.2, 167.6) | 172.8 (167.0, 178.7) | 145.2 (140.2, 150.1)     | 111.5 (100.6, 122.5) | 136.6 (130.8, 142.1) | 162.2 (158.2, 166.1) | 171.2 (167.6, 174.9) |
| urban-rural difference       | 2.2 (0.1, 4.2)           | 2.6 (0.3, 4.9)       | 2.3 (0.2, 4.4)       | 2.0 (-0.1, 4.0)      | 1.8 (-0.6, 4.0)      | 2.2 (0.3, 4.2)           | 2.7 (0.1, 5.2)       | 2.4 (0.2, 4.5)       | 2.1 (0.2, 3.9)       | 1.8 (0.0, 3.7)       |
| <b>Nigeria</b>               |                          |                      |                      |                      |                      |                          |                      |                      |                      |                      |
| rural                        | 141.7 (138.3, 145.2)     | 108.2 (104.5, 111.9) | 132.2 (129.0, 135.5) | 158.8 (154.5, 163.2) | 170.1 (164.2, 175.8) | 141.4 (138.7, 144.1)     | 108.8 (104.4, 113.3) | 132.2 (129.0, 135.5) | 158.1 (155.6, 160.6) | 168.8 (166.7, 171.0) |
| urban                        | 143.8 (140.3, 147.4)     | 110.8 (106.9, 114.5) | 134.5 (131.1, 137.9) | 160.7 (156.3, 165.0) | 171.6 (165.8, 177.3) | 143.6 (140.6, 146.6)     | 111.5 (106.6, 116.4) | 134.5 (131.0, 138.0) | 160.1 (157.5, 162.6) | 170.5 (168.2, 172.7) |
| urban-rural difference       | 2.1 (0.1, 3.9)           | 2.6 (0.5, 4.7)       | 2.2 (0.2, 4.1)       | 1.8 (-0.1, 3.7)      | 1.5 (-0.6, 3.5)      | 2.2 (0.5, 3.9)           | 2.7 (0.5, 5.0)       | 2.3 (0.6, 4.2)       | 1.9 (0.4, 3.5)       | 1.6 (0.1, 3.2)       |
| <b>Sao Tome and Principe</b> |                          |                      |                      |                      |                      |                          |                      |                      |                      |                      |
| rural                        | 143.5 (139.4, 147.7)     | 107.6 (98.5, 117.0)  | 134.2 (130.1, 138.4) | 161.6 (157.3, 165.9) | 172.0 (166.8, 177.3) | 144.2 (140.0, 148.6)     | 110.4 (100.0, 121.1) | 135.5 (130.6, 140.6) | 161.4 (158.5, 164.4) | 170.5 (168.3, 172.7) |
| urban                        | 145.2 (141.2, 149.3)     | 109.7 (100.7, 119.2) | 136.0 (131.9, 140.2) | 163.0 (158.7, 167.4) | 173.2 (167.8, 178.6) | 145.9 (141.6, 150.1)     | 112.5 (102.1, 123.1) | 137.3 (132.4, 142.3) | 162.8 (159.9, 165.9) | 171.7 (169.7, 173.9) |
| urban-rural difference       | 1.7 (0.0, 3.4)           | 2.2 (0.1, 4.3)       | 1.8 (0.1, 3.6)       | 1.5 (-0.2, 3.2)      | 1.2 (-0.6, 3.1)      | 1.6 (0.0, 3.3)           | 2.1 (-0.3, 4.5)      | 1.8 (-0.1, 3.6)      | 1.4 (0.0, 2.9)       | 1.2 (-0.2, 2.5)      |

| Boys                   | Mean height in 1990 (cm) |                      |                      |                      |                      | Mean height in 2020 (cm) |                      |                      |                      |                      |
|------------------------|--------------------------|----------------------|----------------------|----------------------|----------------------|--------------------------|----------------------|----------------------|----------------------|----------------------|
|                        | Age-standardised         | 5 years              | 10 years             | 15 years             | 19 years             | Age-standardised         | 5 years              | 10 years             | 15 years             | 19 years             |
| Senegal                |                          |                      |                      |                      |                      |                          |                      |                      |                      |                      |
| rural                  | 147.4 (143.1, 151.5)     | 111.8 (102.4, 121.3) | 138.3 (134.1, 142.3) | 165.3 (160.7, 169.7) | 175.3 (169.4, 181.3) | 146.9 (142.4, 151.4)     | 112.6 (101.5, 123.8) | 138.0 (132.9, 143.3) | 164.2 (161.1, 167.2) | 173.7 (171.2, 176.1) |
| urban                  | 150.2 (146.1, 154.4)     | 114.9 (105.5, 124.5) | 141.2 (137.0, 145.3) | 167.9 (163.5, 172.4) | 177.8 (171.9, 183.7) | 149.7 (145.2, 154.3)     | 115.8 (104.7, 126.9) | 141.0 (135.8, 146.2) | 166.9 (163.8, 170.0) | 176.2 (173.8, 178.7) |
| urban-rural difference | 2.8 (1.2, 4.5)           | 3.1 (1.1, 5.2)       | 2.9 (1.2, 4.6)       | 2.7 (1.1, 4.3)       | 2.5 (0.8, 4.3)       | 2.9 (1.3, 4.5)           | 3.2 (0.9, 5.5)       | 3.0 (1.2, 4.7)       | 2.7 (1.4, 4.1)       | 2.6 (1.3, 3.8)       |
| Sierra Leone           |                          |                      |                      |                      |                      |                          |                      |                      |                      |                      |
| rural                  | 140.3 (136.5, 144.2)     | 105.1 (96.0, 114.3)  | 131.6 (127.7, 135.4) | 158.1 (154.3, 162.0) | 166.8 (161.2, 172.3) | 140.2 (136.7, 143.7)     | 106.4 (96.3, 116.6)  | 131.9 (127.8, 135.9) | 157.4 (155.6, 159.3) | 165.4 (163.6, 167.2) |
| urban                  | 142.7 (138.8, 146.6)     | 107.9 (98.7, 117.1)  | 134.1 (130.2, 138.0) | 160.4 (156.5, 164.3) | 168.8 (163.3, 174.4) | 142.7 (139.2, 146.2)     | 109.2 (99.0, 119.4)  | 134.5 (130.5, 138.5) | 159.7 (157.7, 161.7) | 167.5 (165.6, 169.4) |
| urban-rural difference | 2.4 (0.8, 4.2)           | 2.8 (0.7, 4.9)       | 2.5 (0.8, 4.3)       | 2.3 (0.6, 4.0)       | 2.1 (0.2, 3.9)       | 2.5 (1.2, 3.9)           | 2.9 (0.7, 5.1)       | 2.6 (1.0, 4.2)       | 2.3 (1.2, 3.5)       | 2.1 (1.0, 3.2)       |
| Togo                   |                          |                      |                      |                      |                      |                          |                      |                      |                      |                      |
| rural                  | 144.0 (139.6, 148.5)     | 108.4 (99.0, 117.6)  | 135.2 (130.6, 139.7) | 162.0 (157.3, 166.9) | 170.7 (164.7, 176.9) | 144.2 (139.4, 149.0)     | 110.1 (98.9, 121.2)  | 135.8 (130.4, 141.3) | 161.5 (158.0, 165.0) | 169.4 (166.3, 172.6) |
| urban                  | 146.2 (141.6, 150.7)     | 111.0 (101.4, 120.2) | 137.5 (132.9, 142.1) | 164.0 (159.2, 168.9) | 172.5 (166.3, 178.8) | 146.4 (141.6, 151.2)     | 112.7 (101.9, 123.5) | 138.2 (132.6, 143.7) | 163.6 (159.9, 167.2) | 171.2 (168.0, 174.5) |
| urban-rural difference | 2.2 (0.0, 4.3)           | 2.5 (0.3, 4.9)       | 2.3 (0.1, 4.4)       | 2.0 (-0.2, 4.1)      | 1.8 (-0.6, 4.1)      | 2.2 (0.2, 4.2)           | 2.6 (0.1, 5.2)       | 2.3 (0.2, 4.4)       | 2.0 (0.1, 3.9)       | 1.8 (-0.1, 3.7)      |

**Supplementary Table 4.** Urban and rural mean body-mass index (BMI) and urban-rural difference in mean BMI in 1990 and 2020 by sex, age-standardised and at ages 5, 10, 15 and 19 years.

| Girls                             | Mean BMI in 1990 (kg/m <sup>2</sup> ) |                   |                   |                   |                   | Mean BMI in 2020 (kg/m <sup>2</sup> ) |                   |                   |                   |                   |
|-----------------------------------|---------------------------------------|-------------------|-------------------|-------------------|-------------------|---------------------------------------|-------------------|-------------------|-------------------|-------------------|
|                                   | Age-standardised                      | 5 years           | 10 years          | 15 years          | 19 years          | Age-standardised                      | 5 years           | 10 years          | 15 years          | 19 years          |
| <b>Central and eastern Europe</b> |                                       |                   |                   |                   |                   |                                       |                   |                   |                   |                   |
| <i>Central Europe</i>             |                                       |                   |                   |                   |                   |                                       |                   |                   |                   |                   |
| Albania                           |                                       |                   |                   |                   |                   |                                       |                   |                   |                   |                   |
| rural                             | 18.2 (16.8, 19.5)                     | 14.9 (13.4, 16.3) | 16.7 (15.3, 18.1) | 20.3 (18.9, 21.7) | 21.6 (20.1, 23.0) | 18.7 (18.1, 19.3)                     | 15.4 (14.7, 16.1) | 17.3 (16.7, 17.9) | 20.8 (20.2, 21.4) | 22.1 (21.3, 22.8) |
| urban                             | 18.4 (17.0, 19.8)                     | 15.4 (14.0, 16.8) | 17.0 (15.6, 18.4) | 20.4 (19.0, 21.8) | 21.5 (20.1, 22.9) | 19.1 (18.5, 19.7)                     | 16.0 (15.3, 16.7) | 17.7 (17.1, 18.3) | 21.1 (20.5, 21.7) | 22.2 (21.4, 22.9) |
| urban-rural difference            | 0.2 (-0.4, 0.8)                       | 0.5 (-0.2, 1.2)   | 0.3 (-0.4, 0.9)   | 0.1 (-0.6, 0.7)   | -0.1 (-0.8, 0.6)  | 0.4 (0.0, 0.7)                        | 0.6 (0.2, 1.1)    | 0.4 (0.1, 0.8)    | 0.2 (-0.1, 0.6)   | 0.1 (-0.4, 0.5)   |
| Bosnia and Herzegovina            |                                       |                   |                   |                   |                   |                                       |                   |                   |                   |                   |
| rural                             | 18.0 (16.4, 19.7)                     | 14.7 (12.7, 16.8) | 17.0 (15.3, 18.7) | 20.1 (18.5, 21.7) | 20.5 (18.7, 22.3) | 18.9 (17.5, 20.3)                     | 15.6 (13.7, 17.5) | 17.8 (16.3, 19.4) | 20.9 (19.5, 22.4) | 21.3 (19.8, 22.8) |
| urban                             | 18.0 (16.4, 19.6)                     | 15.0 (13.0, 17.0) | 17.1 (15.4, 18.8) | 19.9 (18.4, 21.5) | 20.2 (18.4, 22.0) | 18.7 (17.2, 20.1)                     | 15.7 (13.8, 17.6) | 17.7 (16.1, 19.3) | 20.6 (19.2, 22.0) | 20.8 (19.3, 22.4) |
| urban-rural difference            | 0.0 (-0.6, 0.7)                       | 0.3 (-0.5, 1.1)   | 0.1 (-0.6, 0.7)   | -0.1 (-0.8, 0.6)  | -0.3 (-1.1, 0.5)  | -0.2 (-0.8, 0.4)                      | 0.1 (-0.7, 0.8)   | -0.1 (-0.8, 0.4)  | -0.3 (-1.0, 0.3)  | -0.5 (-1.3, 0.3)  |
| Bulgaria                          |                                       |                   |                   |                   |                   |                                       |                   |                   |                   |                   |
| rural                             | 18.0 (17.0, 19.1)                     | 14.7 (13.5, 15.8) | 17.2 (16.2, 18.2) | 20.0 (18.9, 21.2) | 19.9 (18.1, 21.6) | 19.0 (18.3, 19.7)                     | 15.6 (14.9, 16.3) | 18.1 (17.5, 18.8) | 21.0 (20.1, 21.8) | 20.8 (19.3, 22.4) |
| urban                             | 18.3 (17.3, 19.2)                     | 15.2 (14.2, 16.2) | 17.5 (16.6, 18.4) | 20.1 (19.1, 21.1) | 19.8 (18.3, 21.5) | 19.0 (18.4, 19.6)                     | 16.0 (15.4, 16.6) | 18.3 (17.7, 18.9) | 20.9 (20.1, 21.6) | 20.6 (19.1, 22.0) |
| urban-rural difference            | 0.3 (-0.4, 0.8)                       | 0.5 (-0.1, 1.2)   | 0.3 (-0.2, 0.9)   | 0.1 (-0.6, 0.8)   | 0.0 (-0.9, 0.8)   | 0.0 (-0.4, 0.5)                       | 0.3 (-0.1, 0.8)   | 0.1 (-0.3, 0.5)   | -0.1 (-0.7, 0.5)  | -0.3 (-1.1, 0.6)  |
| Croatia                           |                                       |                   |                   |                   |                   |                                       |                   |                   |                   |                   |
| rural                             | 18.7 (17.4, 19.9)                     | 15.3 (14.0, 16.6) | 17.8 (16.4, 19.0) | 20.7 (19.4, 22.0) | 20.6 (19.3, 22.0) | 19.6 (19.1, 20.1)                     | 16.3 (15.7, 16.9) | 18.7 (18.2, 19.2) | 21.7 (21.1, 22.3) | 21.6 (20.9, 22.3) |
| urban                             | 18.7 (17.4, 19.9)                     | 15.4 (14.0, 16.7) | 17.8 (16.5, 19.1) | 20.7 (19.4, 22.0) | 20.6 (19.2, 21.9) | 19.3 (18.8, 19.8)                     | 16.0 (15.4, 16.5) | 18.4 (17.8, 18.9) | 21.3 (20.8, 21.8) | 21.2 (20.5, 21.9) |
| urban-rural difference            | 0.0 (-0.5, 0.6)                       | 0.0 (-0.5, 0.7)   | 0.0 (-0.5, 0.6)   | 0.0 (-0.5, 0.5)   | 0.0 (-0.6, 0.6)   | -0.4 (-0.7, 0.0)                      | -0.3 (-0.7, 0.1)  | -0.3 (-0.7, 0.0)  | -0.4 (-0.8, 0.0)  | -0.4 (-0.9, 0.1)  |
| Czechia                           |                                       |                   |                   |                   |                   |                                       |                   |                   |                   |                   |
| rural                             | 18.3 (17.0, 19.6)                     | 15.2 (13.8, 16.5) | 17.1 (15.8, 18.4) | 20.2 (18.8, 21.5) | 21.3 (19.6, 23.0) | 18.7 (18.1, 19.4)                     | 15.6 (15.1, 16.2) | 17.6 (17.0, 18.2) | 20.6 (19.9, 21.4) | 21.8 (20.5, 23.1) |
| urban                             | 18.3 (17.0, 19.5)                     | 15.3 (14.0, 16.6) | 17.1 (15.8, 18.4) | 20.1 (18.8, 21.4) | 21.2 (19.6, 22.8) | 18.6 (17.9, 19.1)                     | 15.6 (15.0, 16.1) | 17.4 (16.8, 18.0) | 20.4 (19.7, 21.1) | 21.5 (20.3, 22.7) |
| urban-rural difference            | 0.0 (-0.5, 0.6)                       | 0.1 (-0.4, 0.7)   | 0.1 (-0.5, 0.6)   | 0.0 (-0.7, 0.6)   | -0.1 (-0.9, 0.8)  | -0.2 (-0.6, 0.2)                      | -0.1 (-0.5, 0.3)  | -0.2 (-0.5, 0.2)  | -0.2 (-0.8, 0.3)  | -0.3 (-1.1, 0.5)  |
| Hungary                           |                                       |                   |                   |                   |                   |                                       |                   |                   |                   |                   |
| rural                             | 18.8 (17.4, 20.2)                     | 15.1 (13.7, 16.5) | 17.8 (16.4, 19.2) | 20.9 (19.5, 22.3) | 21.4 (19.9, 22.8) | 20.3 (20.0, 20.7)                     | 16.6 (16.1, 17.2) | 19.3 (19.0, 19.7) | 22.4 (22.0, 22.8) | 22.9 (22.3, 23.4) |
| urban                             | 18.9 (17.4, 20.2)                     | 15.2 (13.8, 16.6) | 17.9 (16.5, 19.2) | 20.9 (19.5, 22.3) | 21.4 (19.9, 22.7) | 20.0 (19.7, 20.3)                     | 16.3 (15.8, 16.9) | 19.0 (18.7, 19.4) | 22.1 (21.7, 22.4) | 22.5 (22.1, 22.9) |
| urban-rural difference            | 0.0 (-0.5, 0.7)                       | 0.1 (-0.5, 0.8)   | 0.1 (-0.5, 0.7)   | 0.0 (-0.6, 0.7)   | 0.0 (-0.7, 0.8)   | -0.3 (-0.5, -0.1)                     | -0.3 (-0.7, 0.1)  | -0.3 (-0.5, -0.1) | -0.3 (-0.6, 0.0)  | -0.4 (-0.8, 0.1)  |
| North Macedonia                   |                                       |                   |                   |                   |                   |                                       |                   |                   |                   |                   |
| rural                             | 18.3 (17.1, 19.6)                     | 15.0 (13.6, 16.5) | 17.1 (15.8, 18.4) | 20.4 (19.1, 21.7) | 21.4 (19.9, 22.9) | 19.2 (18.5, 19.9)                     | 15.9 (15.1, 16.6) | 18.0 (17.3, 18.6) | 21.2 (20.3, 22.1) | 22.3 (20.9, 23.6) |
| urban                             | 18.5 (17.3, 19.8)                     | 15.5 (14.1, 16.9) | 17.3 (16.0, 18.7) | 20.4 (19.1, 21.8) | 21.3 (19.8, 22.8) | 19.3 (18.6, 19.9)                     | 16.2 (15.5, 17.0) | 18.1 (17.4, 18.7) | 21.2 (20.3, 22.0) | 22.1 (20.7, 23.4) |
| urban-rural difference            | 0.2 (-0.4, 0.8)                       | 0.4 (-0.2, 1.1)   | 0.3 (-0.4, 0.8)   | 0.1 (-0.6, 0.7)   | -0.1 (-1.0, 0.7)  | 0.1 (-0.4, 0.5)                       | 0.3 (-0.1, 0.8)   | 0.1 (-0.2, 0.5)   | 0.0 (-0.6, 0.5)   | -0.2 (-1.0, 0.6)  |
| Montenegro                        |                                       |                   |                   |                   |                   |                                       |                   |                   |                   |                   |
| rural                             | 18.1 (16.7, 19.5)                     | 15.0 (13.5, 16.5) | 17.0 (15.6, 18.4) | 20.1 (18.7, 21.5) | 20.5 (19.0, 22.1) | 18.8 (18.4, 19.2)                     | 15.8 (15.2, 16.3) | 17.7 (17.3, 18.2) | 20.8 (20.3, 21.3) | 21.3 (20.5, 22.0) |
| urban                             | 18.3 (16.9, 19.7)                     | 15.3 (13.8, 16.7) | 17.2 (15.8, 18.6) | 20.2 (18.8, 21.6) | 20.6 (19.1, 22.2) | 19.0 (18.6, 19.3)                     | 16.0 (15.5, 16.4) | 17.9 (17.5, 18.3) | 20.9 (20.4, 21.4) | 21.3 (20.6, 22.0) |
| urban-rural difference            | 0.2 (-0.4, 0.8)                       | 0.3 (-0.4, 0.9)   | 0.2 (-0.4, 0.8)   | 0.2 (-0.5, 0.8)   | 0.1 (-0.6, 0.9)   | 0.1 (-0.2, 0.4)                       | 0.2 (-0.2, 0.6)   | 0.1 (-0.1, 0.4)   | 0.1 (-0.3, 0.5)   | 0.0 (-0.5, 0.6)   |
| Poland                            |                                       |                   |                   |                   |                   |                                       |                   |                   |                   |                   |
| rural                             | 18.3 (17.1, 19.4)                     | 15.0 (13.8, 16.2) | 17.3 (16.1, 18.4) | 20.3 (19.2, 21.5) | 20.7 (19.5, 21.9) | 19.0 (18.6, 19.5)                     | 15.8 (15.3, 16.3) | 18.0 (17.5, 18.4) | 21.0 (20.6, 21.5) | 21.5 (20.9, 22.1) |
| urban                             | 18.3 (17.2, 19.5)                     | 15.1 (13.9, 16.2) | 17.3 (16.2, 18.4) | 20.4 (19.2, 21.5) | 20.8 (19.6, 22.0) | 18.8 (18.4, 19.3)                     | 15.5 (15.1, 16.0) | 17.8 (17.4, 18.2) | 20.8 (20.4, 21.3) | 21.3 (20.7, 21.9) |
| urban-rural difference            | 0.0 (-0.4, 0.5)                       | 0.0 (-0.5, 0.5)   | 0.0 (-0.4, 0.5)   | 0.0 (-0.4, 0.5)   | 0.0 (-0.5, 0.6)   | -0.2 (-0.5, 0.1)                      | -0.2 (-0.5, 0.1)  | -0.2 (-0.5, 0.1)  | -0.2 (-0.5, 0.1)  | -0.2 (-0.6, 0.2)  |
| Romania                           |                                       |                   |                   |                   |                   |                                       |                   |                   |                   |                   |
| rural                             | 17.8 (16.6, 18.9)                     | 14.4 (13.3, 15.6) | 16.6 (15.5, 17.8) | 20.0 (18.8, 21.1) | 20.1 (18.8, 21.3) | 18.8 (18.3, 19.3)                     | 15.4 (14.9, 15.9) | 17.6 (17.1, 18.1) | 20.9 (20.4, 21.5) | 21.0 (20.3, 21.8) |
| urban                             | 18.0 (16.8, 19.1)                     | 15.2 (14.1, 16.4) | 17.0 (15.8, 18.2) | 19.9 (18.7, 21.1) | 19.6 (18.4, 20.9) | 18.7 (18.2, 19.2)                     | 15.9 (15.5, 16.4) | 17.7 (17.2, 18.2) | 20.6 (20.1, 21.1) | 20.4 (19.7, 21.0) |
| urban-rural difference            | 0.2 (-0.2, 0.7)                       | 0.8 (0.3, 1.3)    | 0.4 (0.0, 0.8)    | -0.1 (-0.5, 0.4)  | -0.4 (-0.9, 0.1)  | -0.1 (-0.4, 0.2)                      | 0.5 (0.2, 0.9)    | 0.1 (-0.2, 0.4)   | -0.3 (-0.7, 0.0)  | -0.7 (-1.2, -0.2) |
| Serbia                            |                                       |                   |                   |                   |                   |                                       |                   |                   |                   |                   |
| rural                             | 18.2 (16.9, 19.3)                     | 15.0 (13.7, 16.3) | 17.1 (15.9, 18.3) | 20.1 (18.8, 21.3) | 20.7 (19.4, 22.0) | 19.5 (18.9, 20.0)                     | 16.3 (15.6, 17.0) | 18.4 (17.8, 19.0) | 21.4 (20.8, 22.0) | 22.0 (21.2, 22.8) |
| urban                             | 18.4 (17.1, 19.6)                     | 15.5 (14.1, 16.8) | 17.4 (16.1, 18.6) | 20.2 (18.9, 21.4) | 20.6 (19.3, 21.9) | 19.3 (18.7, 19.9)                     | 16.4 (15.7, 17.1) | 18.3 (17.8, 18.9) | 21.1 (20.5, 21.7) | 21.6 (20.9, 22.3) |
| urban-rural difference            | 0.2 (-0.3, 0.7)                       | 0.4 (-0.1, 1.1)   | 0.3 (-0.2, 0.8)   | 0.1 (-0.4, 0.6)   | -0.1 (-0.6, 0.5)  | -0.2 (-0.5, 0.2)                      | 0.1 (-0.4, 0.5)   | -0.1 (-0.5, 0.2)  | -0.3 (-0.7, 0.1)  | -0.4 (-1.0, 0.1)  |
| Slovakia                          |                                       |                   |                   |                   |                   |                                       |                   |                   |                   |                   |
| rural                             | 18.4 (17.5, 19.2)                     | 15.1 (14.2, 15.9) | 17.2 (16.4, 18.0) | 20.4 (19.5, 21.2) | 21.2 (20.3, 22.1) | 19.4 (18.7, 20.0)                     | 16.1 (15.4, 16.8) | 18.2 (17.6, 18.8) | 21.4 (20.7, 22.0) | 22.2 (21.4, 23.0) |
| urban                             | 18.3 (17.5, 19.1)                     | 15.3 (14.4, 16.1) | 17.2 (16.4, 18.0) | 20.2 (19.3, 21.0) | 20.8 (19.9, 21.7) | 18.9 (18.3, 19.6)                     | 15.9 (15.2, 16.6) | 17.8 (17.2, 18.5) | 20.8 (20.2, 21.5) | 21.5 (20.7, 22.3) |
| urban-rural difference            | -0.1 (-0.5, 0.4)                      | 0.2 (-0.3, 0.8)   | 0.0 (-0.4, 0.5)   | -0.2 (-0.7, 0.3)  | -0.4 (-0.9, 0.2)  | -0.4 (-0.9, 0.0)                      | -0.1 (-0.6, 0.3)  | -0.4 (-0.8, 0.1)  | -0.6 (-1.1, -0.1) | -0.7 (-1.3, -0.2) |
| Slovenia                          |                                       |                   |                   |                   |                   |                                       |                   |                   |                   |                   |

| Girls                                             | Mean BMI in 1990 (kg/m <sup>2</sup> ) |                   |                   |                   |                   | Mean BMI in 2020 (kg/m <sup>2</sup> ) |                   |                   |                   |                   |
|---------------------------------------------------|---------------------------------------|-------------------|-------------------|-------------------|-------------------|---------------------------------------|-------------------|-------------------|-------------------|-------------------|
|                                                   | Age-standardised                      | 5 years           | 10 years          | 15 years          | 19 years          | Age-standardised                      | 5 years           | 10 years          | 15 years          | 19 years          |
| rural                                             | 18.8 (18.5, 19.1)                     | 15.3 (14.9, 15.6) | 17.8 (17.5, 18.1) | 20.8 (20.5, 21.1) | 21.2 (20.8, 21.6) | 19.5 (19.1, 19.9)                     | 16.0 (15.5, 16.5) | 18.5 (18.1, 19.0) | 21.5 (21.1, 22.0) | 22.0 (21.5, 22.5) |
| urban                                             | 19.0 (18.7, 19.3)                     | 15.3 (14.9, 15.6) | 17.9 (17.6, 18.2) | 21.1 (20.8, 21.4) | 21.6 (21.2, 22.0) | 19.7 (19.3, 20.1)                     | 16.0 (15.6, 16.5) | 18.7 (18.3, 19.1) | 21.8 (21.4, 22.3) | 22.4 (21.9, 22.8) |
| urban-rural difference                            | 0.2 (-0.3, 0.6)                       | 0.0 (-0.5, 0.5)   | 0.1 (-0.3, 0.6)   | 0.3 (-0.2, 0.8)   | 0.4 (-0.2, 1.0)   | 0.2 (-0.2, 0.6)                       | 0.0 (-0.5, 0.5)   | 0.1 (-0.2, 0.6)   | 0.3 (-0.2, 0.7)   | 0.4 (-0.2, 1.0)   |
| <b>Eastern Europe</b>                             |                                       |                   |                   |                   |                   |                                       |                   |                   |                   |                   |
| <b>Belarus</b>                                    |                                       |                   |                   |                   |                   |                                       |                   |                   |                   |                   |
| rural                                             | 18.2 (16.5, 19.9)                     | 15.2 (13.1, 17.3) | 17.0 (15.2, 18.8) | 20.1 (18.5, 21.9) | 20.9 (19.0, 22.8) | 18.8 (17.4, 20.1)                     | 15.8 (13.9, 17.7) | 17.6 (16.0, 19.1) | 20.8 (19.4, 22.1) | 21.5 (20.1, 22.9) |
| urban                                             | 18.1 (16.4, 19.8)                     | 15.3 (13.3, 17.4) | 17.0 (15.2, 18.8) | 20.0 (18.3, 21.7) | 20.6 (18.8, 22.4) | 18.8 (17.5, 20.0)                     | 16.0 (14.1, 17.8) | 17.6 (16.1, 19.1) | 20.6 (19.4, 21.9) | 21.2 (20.1, 22.4) |
| urban-rural difference                            | -0.1 (-0.7, 0.6)                      | 0.1 (-0.7, 0.9)   | 0.0 (-0.7, 0.7)   | -0.1 (-0.8, 0.6)  | -0.2 (-1.1, 0.7)  | 0.0 (-0.7, 0.6)                       | 0.2 (-0.6, 0.9)   | 0.0 (-0.6, 0.6)   | -0.1 (-0.8, 0.6)  | -0.2 (-1.1, 0.6)  |
| <b>Estonia</b>                                    |                                       |                   |                   |                   |                   |                                       |                   |                   |                   |                   |
| rural                                             | 18.5 (17.2, 19.8)                     | 15.1 (13.7, 16.4) | 17.3 (15.9, 18.6) | 20.5 (19.2, 21.9) | 21.4 (20.0, 22.7) | 19.4 (18.8, 20.0)                     | 16.0 (15.3, 16.6) | 18.2 (17.6, 18.7) | 21.5 (20.8, 22.1) | 22.3 (21.5, 23.2) |
| urban                                             | 18.4 (17.2, 19.7)                     | 14.9 (13.6, 16.3) | 17.2 (15.9, 18.5) | 20.6 (19.3, 21.9) | 21.5 (20.2, 22.8) | 19.4 (18.8, 19.9)                     | 15.9 (15.2, 16.5) | 18.1 (17.6, 18.7) | 21.5 (20.8, 22.1) | 22.4 (21.5, 23.2) |
| urban-rural difference                            | 0.0 (-0.6, 0.6)                       | -0.1 (-0.8, 0.6)  | -0.1 (-0.6, 0.5)  | 0.0 (-0.6, 0.6)   | 0.1 (-0.5, 0.7)   | 0.0 (-0.4, 0.3)                       | -0.1 (-0.5, 0.3)  | 0.0 (-0.4, 0.3)   | 0.0 (-0.4, 0.4)   | 0.1 (-0.4, 0.6)   |
| <b>Latvia</b>                                     |                                       |                   |                   |                   |                   |                                       |                   |                   |                   |                   |
| rural                                             | 18.3 (16.8, 19.8)                     | 15.2 (13.7, 16.7) | 17.0 (15.6, 18.4) | 20.2 (18.6, 21.9) | 21.1 (18.5, 23.7) | 18.9 (18.1, 19.7)                     | 15.9 (15.2, 16.6) | 17.7 (17.1, 18.3) | 20.9 (19.9, 21.9) | 21.8 (19.4, 24.0) |
| urban                                             | 18.3 (16.8, 19.8)                     | 15.4 (13.9, 16.8) | 17.1 (15.7, 18.5) | 20.2 (18.6, 21.8) | 21.0 (18.3, 23.6) | 19.0 (18.2, 19.7)                     | 16.0 (15.4, 16.7) | 17.8 (17.2, 18.4) | 20.9 (19.9, 21.9) | 21.7 (19.3, 23.9) |
| urban-rural difference                            | 0.0 (-0.6, 0.7)                       | 0.1 (-0.5, 0.8)   | 0.1 (-0.5, 0.7)   | 0.0 (-0.7, 0.7)   | -0.1 (-1.0, 0.8)  | 0.0 (-0.4, 0.4)                       | 0.1 (-0.3, 0.5)   | 0.1 (-0.3, 0.4)   | 0.0 (-0.6, 0.5)   | -0.1 (-0.9, 0.7)  |
| <b>Lithuania</b>                                  |                                       |                   |                   |                   |                   |                                       |                   |                   |                   |                   |
| rural                                             | 18.2 (16.7, 19.7)                     | 15.4 (13.9, 17.0) | 17.0 (15.5, 18.4) | 20.1 (18.6, 21.6) | 20.9 (18.7, 23.1) | 18.9 (18.2, 19.5)                     | 16.1 (15.3, 16.9) | 17.6 (17.0, 18.3) | 20.7 (19.9, 21.6) | 21.6 (19.8, 23.3) |
| urban                                             | 18.2 (16.8, 19.7)                     | 15.6 (14.1, 17.1) | 17.0 (15.6, 18.5) | 20.0 (18.5, 21.5) | 20.7 (18.5, 22.9) | 18.8 (18.2, 19.5)                     | 16.2 (15.5, 17.0) | 17.7 (17.0, 18.3) | 20.6 (19.8, 21.5) | 21.4 (19.6, 23.1) |
| urban-rural difference                            | 0.0 (-0.6, 0.6)                       | 0.2 (-0.5, 0.8)   | 0.0 (-0.6, 0.7)   | -0.1 (-0.7, 0.6)  | -0.2 (-1.0, 0.7)  | 0.0 (-0.4, 0.4)                       | 0.1 (-0.3, 0.5)   | 0.0 (-0.3, 0.4)   | -0.1 (-0.6, 0.4)  | -0.2 (-1.0, 0.6)  |
| <b>Moldova</b>                                    |                                       |                   |                   |                   |                   |                                       |                   |                   |                   |                   |
| rural                                             | 18.1 (16.7, 19.5)                     | 14.8 (13.2, 16.5) | 16.6 (15.2, 18.1) | 20.2 (18.8, 21.6) | 21.4 (19.9, 22.9) | 18.5 (17.5, 19.6)                     | 15.2 (14.0, 16.5) | 17.1 (16.0, 18.2) | 20.6 (19.5, 21.7) | 21.8 (20.7, 23.0) |
| urban                                             | 18.0 (16.6, 19.4)                     | 15.1 (13.4, 16.7) | 16.6 (15.2, 18.1) | 20.0 (18.6, 21.4) | 21.0 (19.5, 22.4) | 18.5 (17.4, 19.5)                     | 15.5 (14.3, 16.8) | 17.1 (16.1, 18.2) | 20.4 (19.3, 21.5) | 21.4 (20.3, 22.6) |
| urban-rural difference                            | -0.1 (-0.6, 0.5)                      | 0.3 (-0.4, 1.0)   | 0.0 (-0.6, 0.6)   | -0.2 (-0.8, 0.3)  | -0.4 (-1.1, 0.2)  | 0.0 (-0.5, 0.4)                       | 0.3 (-0.3, 1.0)   | 0.1 (-0.4, 0.5)   | -0.2 (-0.7, 0.3)  | -0.4 (-1.0, 0.2)  |
| <b>Russian Federation</b>                         |                                       |                   |                   |                   |                   |                                       |                   |                   |                   |                   |
| rural                                             | 19.0 (18.4, 19.5)                     | 16.5 (15.9, 17.0) | 17.4 (16.9, 17.9) | 20.8 (20.3, 21.4) | 22.3 (21.7, 22.9) | 18.8 (18.0, 19.5)                     | 16.3 (15.5, 17.1) | 17.2 (16.4, 18.0) | 20.7 (19.9, 21.4) | 22.1 (21.3, 22.9) |
| urban                                             | 18.6 (18.1, 19.1)                     | 16.3 (15.7, 16.8) | 17.1 (16.6, 17.6) | 20.4 (19.9, 21.0) | 21.8 (21.2, 22.3) | 18.8 (18.1, 19.4)                     | 16.4 (15.7, 17.1) | 17.2 (16.6, 17.9) | 20.6 (19.9, 21.2) | 21.9 (21.2, 22.6) |
| urban-rural difference                            | -0.3 (-0.6, -0.1)                     | -0.2 (-0.5, 0.1)  | -0.3 (-0.5, 0.0)  | -0.4 (-0.7, -0.1) | -0.5 (-0.8, -0.2) | 0.0 (-0.5, 0.5)                       | 0.1 (-0.4, 0.7)   | 0.0 (-0.4, 0.5)   | -0.1 (-0.5, 0.4)  | -0.2 (-0.7, 0.4)  |
| <b>Ukraine</b>                                    |                                       |                   |                   |                   |                   |                                       |                   |                   |                   |                   |
| rural                                             | 17.6 (16.2, 19.1)                     | 15.2 (13.8, 16.8) | 16.5 (15.1, 18.0) | 19.2 (17.8, 20.7) | 20.4 (18.8, 22.0) | 17.8 (17.4, 18.3)                     | 15.4 (14.8, 16.0) | 16.7 (16.3, 17.2) | 19.4 (18.9, 19.9) | 20.6 (19.7, 21.4) |
| urban                                             | 17.7 (16.3, 19.2)                     | 15.4 (14.0, 16.9) | 16.6 (15.3, 18.1) | 19.3 (17.9, 20.8) | 20.4 (18.8, 22.1) | 18.2 (17.7, 18.6)                     | 15.8 (15.2, 16.4) | 17.1 (16.6, 17.5) | 19.7 (19.3, 20.2) | 20.8 (20.0, 21.7) |
| urban-rural difference                            | 0.1 (-0.6, 0.7)                       | 0.2 (-0.6, 0.8)   | 0.1 (-0.5, 0.7)   | 0.1 (-0.6, 0.7)   | 0.0 (-0.7, 0.7)   | 0.3 (0.0, 0.6)                        | 0.4 (0.0, 0.8)    | 0.3 (0.0, 0.7)    | 0.3 (0.0, 0.6)    | 0.3 (-0.2, 0.7)   |
| <b>Central Asia, Middle East and north Africa</b> |                                       |                   |                   |                   |                   |                                       |                   |                   |                   |                   |
| <b>Central Asia</b>                               |                                       |                   |                   |                   |                   |                                       |                   |                   |                   |                   |
| <b>Armenia</b>                                    |                                       |                   |                   |                   |                   |                                       |                   |                   |                   |                   |
| rural                                             | 19.1 (17.9, 20.4)                     | 15.7 (14.1, 17.3) | 17.6 (16.3, 18.9) | 21.4 (20.2, 22.7) | 22.6 (21.4, 23.9) | 19.0 (18.4, 19.6)                     | 15.6 (14.6, 16.6) | 17.5 (16.8, 18.1) | 21.3 (20.6, 22.0) | 22.5 (21.7, 23.2) |
| urban                                             | 19.0 (17.8, 20.3)                     | 16.1 (14.5, 17.7) | 17.6 (16.3, 19.0) | 21.1 (19.8, 22.4) | 22.0 (20.8, 23.3) | 19.1 (18.5, 19.7)                     | 16.2 (15.2, 17.1) | 17.7 (17.1, 18.3) | 21.2 (20.5, 21.9) | 22.1 (21.4, 22.9) |
| urban-rural difference                            | -0.1 (-0.7, 0.4)                      | 0.3 (-0.5, 1.1)   | 0.0 (-0.6, 0.6)   | -0.3 (-0.8, 0.2)  | -0.6 (-1.1, -0.1) | 0.1 (-0.3, 0.5)                       | 0.6 (0.0, 1.2)    | 0.3 (-0.2, 0.7)   | -0.1 (-0.5, 0.3)  | -0.3 (-0.9, 0.2)  |
| <b>Azerbaijan</b>                                 |                                       |                   |                   |                   |                   |                                       |                   |                   |                   |                   |
| rural                                             | 19.0 (17.6, 20.5)                     | 15.6 (13.7, 17.5) | 17.6 (16.1, 19.1) | 21.3 (19.9, 22.7) | 22.4 (21.0, 23.8) | 19.1 (18.0, 20.2)                     | 15.6 (13.9, 17.4) | 17.6 (16.4, 18.8) | 21.3 (20.3, 22.3) | 22.4 (21.4, 23.4) |
| urban                                             | 18.9 (17.5, 20.4)                     | 15.8 (13.8, 17.8) | 17.6 (16.0, 19.1) | 21.1 (19.7, 22.4) | 22.0 (20.6, 23.4) | 19.1 (18.0, 20.2)                     | 16.0 (14.2, 17.7) | 17.7 (16.5, 18.9) | 21.2 (20.2, 22.2) | 22.1 (21.1, 23.2) |
| urban-rural difference                            | -0.1 (-0.7, 0.5)                      | 0.2 (-0.7, 1.1)   | 0.0 (-0.7, 0.6)   | -0.2 (-0.8, 0.3)  | -0.4 (-1.1, 0.2)  | 0.0 (-0.5, 0.6)                       | 0.3 (-0.5, 1.1)   | 0.1 (-0.5, 0.7)   | -0.1 (-0.6, 0.4)  | -0.3 (-0.9, 0.3)  |
| <b>Georgia</b>                                    |                                       |                   |                   |                   |                   |                                       |                   |                   |                   |                   |
| rural                                             | 18.5 (17.0, 20.0)                     | 15.2 (13.4, 16.9) | 17.1 (15.6, 18.6) | 20.8 (19.2, 22.3) | 21.6 (19.9, 23.3) | 19.1 (18.4, 19.8)                     | 15.8 (14.9, 16.6) | 17.7 (17.0, 18.4) | 21.4 (20.5, 22.3) | 22.2 (20.9, 23.4) |
| urban                                             | 18.5 (17.0, 20.0)                     | 15.6 (13.9, 17.3) | 17.2 (15.6, 18.7) | 20.6 (19.0, 22.1) | 21.1 (19.4, 22.8) | 19.2 (18.6, 19.9)                     | 16.3 (15.4, 17.1) | 17.9 (17.3, 18.6) | 21.3 (20.4, 22.2) | 21.9 (20.7, 23.1) |
| urban-rural difference                            | 0.0 (-0.7, 0.6)                       | 0.4 (-0.4, 1.2)   | 0.1 (-0.6, 0.7)   | -0.2 (-0.9, 0.5)  | -0.5 (-1.3, 0.3)  | 0.1 (-0.3, 0.5)                       | 0.5 (0.0, 1.0)    | 0.2 (-0.2, 0.6)   | -0.1 (-0.6, 0.5)  | -0.3 (-1.1, 0.4)  |
| <b>Kazakhstan</b>                                 |                                       |                   |                   |                   |                   |                                       |                   |                   |                   |                   |
| rural                                             | 18.6 (17.6, 19.7)                     | 15.4 (14.2, 16.7) | 17.3 (16.2, 18.4) | 20.6 (19.6, 21.7) | 21.8 (20.6, 22.9) | 18.2 (17.7, 18.7)                     | 15.0 (14.3, 15.7) | 16.9 (16.4, 17.4) | 20.2 (19.6, 20.8) | 21.4 (20.6, 22.1) |
| urban                                             | 18.7 (17.7, 19.7)                     | 15.8 (14.7, 17.0) | 17.5 (16.4, 18.6) | 20.6 (19.5, 21.6) | 21.5 (20.4, 22.6) | 18.4 (18.0, 18.9)                     | 15.6 (14.9, 16.2) | 17.2 (16.8, 17.7) | 20.3 (19.8, 20.9) | 21.3 (20.5, 22.0) |
| urban-rural difference                            | 0.1 (-0.5, 0.6)                       | 0.4 (-0.3, 1.1)   | 0.2 (-0.4, 0.7)   | -0.1 (-0.6, 0.5)  | -0.2 (-0.8, 0.3)  | 0.2 (-0.1, 0.6)                       | 0.5 (0.1, 1.0)    | 0.3 (0.0, 0.7)    | 0.1 (-0.3, 0.5)   | -0.1 (-0.7, 0.5)  |
| <b>Kyrgyzstan</b>                                 |                                       |                   |                   |                   |                   |                                       |                   |                   |                   |                   |

| Girls                               | Mean BMI in 1990 (kg/m <sup>2</sup> ) |                   |                   |                   |                   | Mean BMI in 2020 (kg/m <sup>2</sup> ) |                   |                   |                   |                   |
|-------------------------------------|---------------------------------------|-------------------|-------------------|-------------------|-------------------|---------------------------------------|-------------------|-------------------|-------------------|-------------------|
|                                     | Age-standardised                      | 5 years           | 10 years          | 15 years          | 19 years          | Age-standardised                      | 5 years           | 10 years          | 15 years          | 19 years          |
| rural                               | 18.2 (17.1, 19.4)                     | 14.9 (13.6, 16.4) | 16.7 (15.5, 17.9) | 20.4 (19.2, 21.5) | 21.8 (20.6, 23.0) | 18.3 (17.4, 19.1)                     | 15.0 (14.0, 16.0) | 16.8 (15.9, 17.6) | 20.4 (19.5, 21.4) | 21.8 (20.7, 22.9) |
| urban                               | 18.2 (17.0, 19.3)                     | 15.2 (13.8, 16.6) | 16.7 (15.5, 18.0) | 20.2 (19.0, 21.3) | 21.4 (20.2, 22.6) | 18.2 (17.4, 19.1)                     | 15.3 (14.3, 16.2) | 16.8 (16.0, 17.7) | 20.3 (19.3, 21.2) | 21.5 (20.4, 22.6) |
| urban-rural difference              | -0.1 (-0.6, 0.5)                      | 0.2 (-0.5, 1.0)   | 0.0 (-0.5, 0.6)   | -0.2 (-0.7, 0.3)  | -0.4 (-0.9, 0.2)  | 0.0 (-0.5, 0.4)                       | 0.3 (-0.3, 0.8)   | 0.0 (-0.4, 0.4)   | -0.2 (-0.6, 0.3)  | -0.3 (-0.9, 0.2)  |
| <b>Mongolia</b>                     |                                       |                   |                   |                   |                   |                                       |                   |                   |                   |                   |
| rural                               | 18.5 (17.0, 20.0)                     | 15.0 (13.0, 17.0) | 17.0 (15.4, 18.5) | 20.7 (19.3, 22.2) | 22.1 (20.6, 23.6) | 19.1 (18.4, 19.8)                     | 15.6 (14.1, 17.1) | 17.6 (16.8, 18.4) | 21.3 (20.7, 21.9) | 22.7 (22.0, 23.4) |
| urban                               | 18.4 (16.8, 19.9)                     | 15.2 (13.2, 17.2) | 16.9 (15.4, 18.5) | 20.5 (19.0, 22.0) | 21.7 (20.2, 23.2) | 19.0 (18.3, 19.8)                     | 15.8 (14.3, 17.3) | 17.6 (16.8, 18.4) | 21.2 (20.5, 21.8) | 22.4 (21.6, 23.2) |
| urban-rural difference              | -0.1 (-0.7, 0.5)                      | 0.2 (-0.7, 1.0)   | 0.0 (-0.7, 0.6)   | -0.2 (-0.8, 0.4)  | -0.4 (-1.0, 0.3)  | 0.0 (-0.5, 0.4)                       | 0.2 (-0.5, 1.0)   | 0.0 (-0.5, 0.6)   | -0.1 (-0.6, 0.3)  | -0.3 (-0.8, 0.2)  |
| <b>Tajikistan</b>                   |                                       |                   |                   |                   |                   |                                       |                   |                   |                   |                   |
| rural                               | 17.8 (16.4, 19.3)                     | 14.2 (12.5, 15.8) | 16.3 (14.9, 17.8) | 20.2 (18.8, 21.6) | 21.4 (20.0, 22.8) | 18.1 (17.6, 18.6)                     | 14.4 (13.6, 15.3) | 16.6 (16.0, 17.2) | 20.5 (19.8, 21.1) | 21.7 (21.0, 22.4) |
| urban                               | 17.8 (16.4, 19.3)                     | 14.4 (12.8, 16.1) | 16.4 (14.9, 17.8) | 20.0 (18.6, 21.4) | 21.0 (19.5, 22.5) | 18.0 (17.5, 18.5)                     | 14.6 (13.8, 15.5) | 16.6 (16.0, 17.2) | 20.2 (19.6, 20.8) | 21.2 (20.5, 21.9) |
| urban-rural difference              | -0.1 (-0.7, 0.6)                      | 0.2 (-0.5, 1.1)   | 0.0 (-0.6, 0.7)   | -0.2 (-0.8, 0.5)  | -0.4 (-1.0, 0.4)  | -0.1 (-0.5, 0.2)                      | 0.2 (-0.3, 0.7)   | 0.0 (-0.4, 0.3)   | -0.2 (-0.6, 0.1)  | -0.4 (-0.9, 0.0)  |
| <b>Turkmenistan</b>                 |                                       |                   |                   |                   |                   |                                       |                   |                   |                   |                   |
| rural                               | 18.1 (16.6, 19.6)                     | 14.6 (12.9, 16.4) | 16.6 (15.0, 18.2) | 20.3 (18.8, 21.9) | 21.7 (20.0, 23.3) | 18.3 (17.5, 19.1)                     | 14.9 (13.8, 15.9) | 16.8 (15.9, 17.7) | 20.6 (19.6, 21.5) | 21.9 (21.0, 22.9) |
| urban                               | 18.1 (16.6, 19.7)                     | 14.9 (13.2, 16.7) | 16.7 (15.2, 18.3) | 20.2 (18.7, 21.9) | 21.4 (19.9, 23.1) | 18.5 (17.7, 19.2)                     | 15.3 (14.2, 16.3) | 17.0 (16.2, 17.9) | 20.6 (19.7, 21.5) | 21.8 (20.8, 22.7) |
| urban-rural difference              | 0.0 (-0.6, 0.7)                       | 0.3 (-0.5, 1.1)   | 0.1 (-0.5, 0.8)   | -0.1 (-0.8, 0.6)  | -0.2 (-1.1, 0.6)  | 0.1 (-0.3, 0.6)                       | 0.4 (-0.2, 1.0)   | 0.2 (-0.3, 0.7)   | 0.0 (-0.6, 0.6)   | -0.1 (-0.9, 0.6)  |
| <b>Uzbekistan</b>                   |                                       |                   |                   |                   |                   |                                       |                   |                   |                   |                   |
| rural                               | 18.2 (17.0, 19.4)                     | 14.8 (13.0, 16.6) | 16.8 (15.5, 18.1) | 20.5 (19.4, 21.5) | 21.4 (20.2, 22.5) | 19.3 (18.3, 20.3)                     | 15.9 (14.2, 17.6) | 17.9 (16.8, 19.1) | 21.6 (20.7, 22.5) | 22.4 (21.6, 23.3) |
| urban                               | 18.3 (17.1, 19.5)                     | 15.2 (13.4, 17.0) | 17.0 (15.7, 18.3) | 20.4 (19.3, 21.5) | 21.1 (20.0, 22.2) | 19.4 (18.4, 20.4)                     | 16.3 (14.7, 18.0) | 18.1 (17.0, 19.2) | 21.5 (20.6, 22.4) | 22.2 (21.3, 23.1) |
| urban-rural difference              | 0.1 (-0.5, 0.6)                       | 0.4 (-0.4, 1.3)   | 0.2 (-0.4, 0.8)   | -0.1 (-0.6, 0.4)  | -0.3 (-0.8, 0.3)  | 0.1 (-0.5, 0.6)                       | 0.4 (-0.3, 1.2)   | 0.2 (-0.4, 0.8)   | -0.1 (-0.6, 0.4)  | -0.3 (-0.9, 0.3)  |
| <b>Middle East and north Africa</b> |                                       |                   |                   |                   |                   |                                       |                   |                   |                   |                   |
| <b>Algeria</b>                      |                                       |                   |                   |                   |                   |                                       |                   |                   |                   |                   |
| rural                               | 19.0 (17.4, 20.7)                     | 15.4 (13.4, 17.4) | 17.4 (15.6, 19.1) | 21.5 (19.8, 23.1) | 22.8 (21.0, 24.7) | 20.0 (18.8, 21.4)                     | 16.4 (14.7, 18.2) | 18.4 (16.9, 19.9) | 22.5 (21.2, 23.8) | 23.8 (22.5, 25.2) |
| urban                               | 19.2 (17.6, 20.8)                     | 15.6 (13.6, 17.6) | 17.5 (15.8, 19.3) | 21.6 (20.0, 23.2) | 22.9 (21.2, 24.8) | 20.5 (19.2, 21.7)                     | 16.9 (15.1, 18.6) | 18.8 (17.4, 20.3) | 22.9 (21.6, 24.2) | 24.2 (22.9, 25.5) |
| urban-rural difference              | 0.1 (-0.5, 0.8)                       | 0.1 (-0.7, 0.9)   | 0.1 (-0.6, 0.8)   | 0.1 (-0.6, 0.8)   | 0.1 (-0.8, 1.0)   | 0.4 (-0.2, 1.0)                       | 0.4 (-0.4, 1.2)   | 0.4 (-0.2, 1.1)   | 0.4 (-0.2, 1.1)   | 0.4 (-0.4, 1.2)   |
| <b>Bahrain</b>                      |                                       |                   |                   |                   |                   |                                       |                   |                   |                   |                   |
| rural                               | 19.3 (17.9, 20.8)                     | 15.4 (13.7, 17.0) | 17.6 (16.2, 19.1) | 21.9 (20.4, 23.3) | 23.6 (21.7, 25.5) | 20.7 (19.7, 21.7)                     | 16.7 (15.3, 18.1) | 19.0 (18.0, 20.0) | 23.2 (22.2, 24.2) | 24.9 (23.4, 26.6) |
| urban                               | 19.5 (18.1, 20.9)                     | 15.5 (13.9, 17.1) | 17.8 (16.4, 19.1) | 22.0 (20.7, 23.4) | 23.8 (22.0, 25.6) | 21.2 (20.3, 22.1)                     | 17.2 (15.9, 18.4) | 19.5 (18.6, 20.4) | 23.7 (22.9, 24.6) | 25.5 (24.1, 27.0) |
| urban-rural difference              | 0.1 (-0.5, 0.8)                       | 0.1 (-0.7, 0.9)   | 0.1 (-0.5, 0.8)   | 0.2 (-0.6, 0.9)   | 0.2 (-0.7, 1.1)   | 0.5 (-0.2, 1.1)                       | 0.4 (-0.4, 1.2)   | 0.5 (-0.2, 1.1)   | 0.5 (-0.2, 1.2)   | 0.6 (-0.3, 1.4)   |
| <b>Egypt</b>                        |                                       |                   |                   |                   |                   |                                       |                   |                   |                   |                   |
| rural                               | 20.4 (19.0, 21.7)                     | 16.9 (15.3, 18.4) | 18.5 (17.1, 19.8) | 22.9 (21.6, 24.2) | 24.6 (23.1, 26.0) | 21.1 (20.2, 21.9)                     | 17.6 (16.4, 18.7) | 19.2 (18.3, 20.1) | 23.6 (22.8, 24.4) | 25.3 (24.4, 26.2) |
| urban                               | 20.5 (19.1, 21.8)                     | 17.0 (15.4, 18.6) | 18.6 (17.2, 19.9) | 23.0 (21.6, 24.3) | 24.6 (23.2, 26.0) | 21.4 (20.6, 22.3)                     | 18.0 (16.7, 19.2) | 19.6 (18.6, 20.5) | 24.0 (23.1, 24.8) | 25.6 (24.7, 26.5) |
| urban-rural difference              | 0.1 (-0.6, 0.7)                       | 0.1 (-0.7, 0.9)   | 0.1 (-0.6, 0.8)   | 0.0 (-0.6, 0.7)   | 0.0 (-0.8, 0.9)   | 0.4 (-0.2, 0.9)                       | 0.4 (-0.4, 1.2)   | 0.4 (-0.2, 0.9)   | 0.3 (-0.2, 0.8)   | 0.3 (-0.3, 0.9)   |
| <b>Iran</b>                         |                                       |                   |                   |                   |                   |                                       |                   |                   |                   |                   |
| rural                               | 17.5 (16.9, 18.1)                     | 14.2 (13.6, 14.8) | 15.9 (15.3, 16.5) | 19.8 (19.2, 20.4) | 21.0 (20.4, 21.6) | 18.7 (18.1, 19.3)                     | 15.4 (14.8, 16.1) | 17.1 (16.5, 17.7) | 21.1 (20.5, 21.7) | 22.2 (21.6, 22.8) |
| urban                               | 17.7 (17.1, 18.2)                     | 14.4 (13.8, 15.0) | 16.1 (15.5, 16.6) | 20.0 (19.4, 20.6) | 21.2 (20.6, 21.7) | 19.4 (18.8, 20.0)                     | 16.1 (15.5, 16.7) | 17.8 (17.2, 18.4) | 21.7 (21.1, 22.3) | 22.9 (22.3, 23.5) |
| urban-rural difference              | 0.2 (-0.1, 0.5)                       | 0.2 (-0.2, 0.5)   | 0.2 (-0.1, 0.5)   | 0.2 (-0.2, 0.5)   | 0.2 (-0.2, 0.5)   | 0.7 (0.4, 0.9)                        | 0.7 (0.4, 1.0)    | 0.7 (0.4, 0.9)    | 0.7 (0.4, 0.9)    | 0.7 (0.4, 0.9)    |
| <b>Iraq</b>                         |                                       |                   |                   |                   |                   |                                       |                   |                   |                   |                   |
| rural                               | 19.5 (18.0, 21.1)                     | 15.9 (13.9, 18.0) | 17.8 (16.2, 19.5) | 21.9 (20.3, 23.5) | 23.7 (22.0, 25.5) | 20.7 (19.4, 21.9)                     | 17.1 (15.3, 18.8) | 19.0 (17.6, 20.3) | 23.0 (21.8, 24.3) | 24.9 (23.5, 26.3) |
| urban                               | 19.7 (18.1, 21.2)                     | 16.1 (14.1, 18.0) | 18.0 (16.3, 19.6) | 22.0 (20.4, 23.6) | 23.8 (22.1, 25.6) | 21.1 (19.9, 22.3)                     | 17.5 (15.8, 19.3) | 19.4 (18.1, 20.7) | 23.4 (22.2, 24.6) | 25.2 (23.9, 26.6) |
| urban-rural difference              | 0.1 (-0.5, 0.8)                       | 0.2 (-0.6, 1.0)   | 0.1 (-0.5, 0.8)   | 0.1 (-0.6, 0.8)   | 0.1 (-0.8, 1.0)   | 0.4 (-0.2, 1.0)                       | 0.5 (-0.3, 1.2)   | 0.4 (-0.2, 1.0)   | 0.4 (-0.3, 1.1)   | 0.4 (-0.4, 1.2)   |
| <b>Jordan</b>                       |                                       |                   |                   |                   |                   |                                       |                   |                   |                   |                   |
| rural                               | 18.8 (17.3, 20.2)                     | 15.4 (13.7, 17.0) | 17.2 (15.8, 18.7) | 21.0 (19.6, 22.5) | 22.7 (21.1, 24.2) | 19.7 (18.9, 20.5)                     | 16.3 (15.1, 17.4) | 18.1 (17.3, 19.0) | 21.9 (21.1, 22.8) | 23.6 (22.6, 24.6) |
| urban                               | 18.9 (17.5, 20.3)                     | 15.3 (13.8, 16.9) | 17.3 (15.9, 18.7) | 21.2 (19.8, 22.6) | 22.9 (21.4, 24.5) | 20.1 (19.4, 20.9)                     | 16.6 (15.6, 17.6) | 18.5 (17.7, 19.3) | 22.4 (21.7, 23.2) | 24.2 (23.3, 25.0) |
| urban-rural difference              | 0.1 (-0.5, 0.7)                       | 0.0 (-0.7, 0.8)   | 0.1 (-0.5, 0.7)   | 0.2 (-0.4, 0.8)   | 0.3 (-0.5, 1.0)   | 0.4 (0.0, 0.9)                        | 0.3 (-0.4, 1.0)   | 0.4 (-0.1, 0.9)   | 0.5 (0.0, 1.0)    | 0.6 (-0.1, 1.2)   |
| <b>Kuwait</b>                       |                                       |                   |                   |                   |                   |                                       |                   |                   |                   |                   |
| rural                               | 19.9 (18.5, 21.3)                     | 14.7 (13.3, 16.1) | 18.6 (17.2, 19.9) | 22.9 (21.5, 24.3) | 23.5 (22.0, 25.1) | 20.6 (19.5, 21.7)                     | 15.4 (14.2, 16.6) | 19.2 (18.1, 20.3) | 23.6 (22.4, 24.7) | 24.2 (22.8, 25.5) |
| urban                               | 20.2 (18.9, 21.4)                     | 14.7 (13.4, 16.0) | 18.8 (17.4, 20.0) | 23.3 (22.0, 24.6) | 24.1 (22.8, 25.4) | 21.2 (20.2, 22.1)                     | 15.7 (14.7, 16.6) | 19.7 (18.8, 20.6) | 24.3 (23.3, 25.2) | 25.1 (24.0, 26.0) |
| urban-rural difference              | 0.3 (-0.4, 1.0)                       | 0.0 (-0.8, 0.8)   | 0.2 (-0.5, 0.9)   | 0.4 (-0.3, 1.1)   | 0.6 (-0.3, 1.5)   | 0.5 (-0.1, 1.2)                       | 0.3 (-0.5, 1.1)   | 0.5 (-0.2, 1.1)   | 0.7 (0.0, 1.4)    | 0.8 (0.0, 1.7)    |
| <b>Lebanon</b>                      |                                       |                   |                   |                   |                   |                                       |                   |                   |                   |                   |
| rural                               | 18.3 (17.2, 19.3)                     | 15.0 (13.9, 16.1) | 17.1 (16.0, 18.2) | 20.5 (19.4, 21.6) | 21.0 (19.7, 22.2) | 19.8 (18.6, 21.0)                     | 16.5 (15.3, 17.8) | 18.6 (17.4, 19.8) | 22.0 (20.8, 23.3) | 22.5 (21.2, 23.8) |
| urban                               | 18.5 (17.4, 19.6)                     | 15.3 (14.1, 16.5) | 17.3 (16.2, 18.4) | 20.7 (19.6, 21.8) | 21.1 (19.9, 22.3) | 20.3 (19.1, 21.4)                     | 17.1 (15.9, 18.3) | 19.1 (17.9, 20.3) | 22.4 (21.3, 23.6) | 22.8 (21.6, 24.1) |

| Girls                                 | Mean BMI in 1990 (kg/m <sup>2</sup> ) |                   |                   |                   |                   | Mean BMI in 2020 (kg/m <sup>2</sup> ) |                   |                   |                   |                   |
|---------------------------------------|---------------------------------------|-------------------|-------------------|-------------------|-------------------|---------------------------------------|-------------------|-------------------|-------------------|-------------------|
|                                       | Age-standardised                      | 5 years           | 10 years          | 15 years          | 19 years          | Age-standardised                      | 5 years           | 10 years          | 15 years          | 19 years          |
| urban-rural difference                | 0.2 (-0.3, 0.7)                       | 0.3 (-0.3, 0.9)   | 0.2 (-0.3, 0.7)   | 0.1 (-0.4, 0.7)   | 0.1 (-0.6, 0.7)   | 0.5 (-0.1, 1.0)                       | 0.6 (-0.1, 1.2)   | 0.5 (0.0, 1.0)    | 0.4 (-0.2, 1.0)   | 0.4 (-0.3, 1.0)   |
| <b>Libya</b>                          |                                       |                   |                   |                   |                   |                                       |                   |                   |                   |                   |
| rural                                 | 18.8 (16.8, 20.8)                     | 15.2 (13.0, 17.5) | 17.2 (15.3, 19.1) | 21.2 (19.1, 23.2) | 22.3 (19.5, 25.1) | 19.7 (17.8, 21.6)                     | 16.1 (14.0, 18.3) | 18.1 (16.3, 20.0) | 22.1 (20.2, 24.1) | 23.2 (20.5, 26.0) |
| urban                                 | 18.9 (16.9, 20.9)                     | 15.3 (13.1, 17.6) | 17.4 (15.4, 19.3) | 21.3 (19.3, 23.4) | 22.5 (19.7, 25.3) | 20.2 (18.2, 22.0)                     | 16.6 (14.4, 18.7) | 18.6 (16.7, 20.5) | 22.6 (20.6, 24.5) | 23.7 (21.0, 26.4) |
| urban-rural difference                | 0.1 (-0.5, 0.8)                       | 0.1 (-0.7, 1.0)   | 0.1 (-0.5, 0.8)   | 0.1 (-0.6, 0.9)   | 0.2 (-0.7, 1.1)   | 0.5 (-0.2, 1.1)                       | 0.4 (-0.4, 1.2)   | 0.4 (-0.2, 1.1)   | 0.5 (-0.2, 1.2)   | 0.5 (-0.4, 1.4)   |
| <b>Morocco</b>                        |                                       |                   |                   |                   |                   |                                       |                   |                   |                   |                   |
| rural                                 | 18.1 (16.8, 19.5)                     | 14.7 (13.1, 16.2) | 16.5 (15.1, 17.9) | 20.5 (19.1, 21.8) | 21.7 (20.3, 23.1) | 18.9 (18.3, 19.4)                     | 15.4 (14.7, 16.2) | 17.3 (16.7, 17.8) | 21.2 (20.6, 21.9) | 22.5 (21.7, 23.3) |
| urban                                 | 18.1 (16.8, 19.5)                     | 14.9 (13.4, 16.4) | 16.6 (15.2, 18.0) | 20.4 (19.1, 21.7) | 21.5 (20.1, 22.9) | 19.2 (18.6, 19.7)                     | 16.0 (15.2, 16.7) | 17.6 (17.1, 18.2) | 21.5 (20.8, 22.1) | 22.6 (21.8, 23.4) |
| urban-rural difference                | 0.0 (-0.5, 0.6)                       | 0.2 (-0.5, 1.0)   | 0.1 (-0.5, 0.6)   | -0.1 (-0.6, 0.5)  | -0.2 (-0.8, 0.5)  | 0.3 (-0.1, 0.7)                       | 0.5 (0.0, 1.1)    | 0.4 (-0.1, 0.8)   | 0.2 (-0.2, 0.7)   | 0.1 (-0.5, 0.7)   |
| <b>Occupied Palestinian Territory</b> |                                       |                   |                   |                   |                   |                                       |                   |                   |                   |                   |
| rural                                 | 19.5 (18.2, 20.9)                     | 15.9 (14.0, 17.7) | 18.1 (16.6, 19.5) | 22.0 (20.7, 23.3) | 22.5 (21.1, 24.0) | 20.0 (18.7, 21.4)                     | 16.4 (14.6, 18.2) | 18.6 (17.3, 20.0) | 22.5 (21.3, 23.8) | 23.0 (21.6, 24.5) |
| urban                                 | 19.5 (18.1, 20.9)                     | 15.8 (14.0, 17.7) | 18.0 (16.6, 19.5) | 22.0 (20.7, 23.3) | 22.5 (21.2, 23.9) | 20.4 (19.1, 21.6)                     | 16.7 (15.0, 18.4) | 18.9 (17.6, 20.2) | 22.9 (21.6, 24.1) | 23.4 (22.1, 24.8) |
| urban-rural difference                | 0.0 (-0.7, 0.6)                       | -0.1 (-0.9, 0.7)  | 0.0 (-0.7, 0.6)   | 0.0 (-0.7, 0.6)   | 0.0 (-0.8, 0.8)   | 0.3 (-0.3, 0.9)                       | 0.3 (-0.5, 1.1)   | 0.3 (-0.3, 0.9)   | 0.3 (-0.3, 1.0)   | 0.4 (-0.4, 1.2)   |
| <b>Oman</b>                           |                                       |                   |                   |                   |                   |                                       |                   |                   |                   |                   |
| rural                                 | 18.1 (16.6, 19.6)                     | 14.7 (12.8, 16.6) | 16.6 (15.1, 18.1) | 20.5 (19.0, 21.9) | 21.6 (19.9, 23.3) | 19.4 (18.3, 20.4)                     | 15.9 (14.3, 17.6) | 17.8 (16.7, 19.0) | 21.7 (20.7, 22.7) | 22.8 (21.5, 24.1) |
| urban                                 | 18.3 (16.9, 19.8)                     | 14.8 (12.9, 16.7) | 16.8 (15.2, 18.3) | 20.7 (19.3, 22.2) | 21.9 (20.2, 23.6) | 19.9 (19.0, 20.8)                     | 16.4 (14.8, 17.9) | 18.4 (17.4, 19.4) | 22.3 (21.4, 23.2) | 23.5 (22.3, 24.6) |
| urban-rural difference                | 0.2 (-0.5, 0.8)                       | 0.1 (-0.7, 0.9)   | 0.2 (-0.5, 0.8)   | 0.2 (-0.5, 1.0)   | 0.3 (-0.5, 1.2)   | 0.6 (-0.1, 1.2)                       | 0.4 (-0.4, 1.2)   | 0.5 (-0.1, 1.2)   | 0.6 (-0.1, 1.3)   | 0.7 (-0.2, 1.5)   |
| <b>Qatar</b>                          |                                       |                   |                   |                   |                   |                                       |                   |                   |                   |                   |
| rural                                 | 19.4 (17.9, 21.0)                     | 15.8 (13.9, 17.8) | 17.8 (16.2, 19.4) | 21.9 (20.3, 23.5) | 23.3 (21.5, 25.2) | 20.3 (18.9, 21.7)                     | 16.7 (14.9, 18.6) | 18.7 (17.2, 20.1) | 22.8 (21.3, 24.2) | 24.2 (22.5, 25.9) |
| urban                                 | 19.6 (18.1, 21.1)                     | 15.9 (14.0, 17.9) | 17.9 (16.3, 19.5) | 22.1 (20.5, 23.5) | 23.5 (21.8, 25.2) | 20.8 (19.5, 22.1)                     | 17.2 (15.4, 18.9) | 19.2 (17.7, 20.5) | 23.3 (21.9, 24.6) | 24.7 (23.2, 26.3) |
| urban-rural difference                | 0.2 (-0.5, 0.8)                       | 0.1 (-0.7, 0.9)   | 0.1 (-0.5, 0.8)   | 0.2 (-0.5, 0.9)   | 0.2 (-0.7, 1.1)   | 0.5 (-0.2, 1.1)                       | 0.4 (-0.4, 1.2)   | 0.5 (-0.2, 1.1)   | 0.5 (-0.2, 1.2)   | 0.5 (-0.4, 1.4)   |
| <b>Saudi Arabia</b>                   |                                       |                   |                   |                   |                   |                                       |                   |                   |                   |                   |
| rural                                 | 19.2 (18.1, 20.2)                     | 14.9 (13.7, 16.2) | 17.5 (16.4, 18.6) | 21.8 (20.7, 22.9) | 23.6 (22.4, 24.7) | 20.0 (18.9, 21.2)                     | 15.8 (14.5, 17.1) | 18.3 (17.2, 19.5) | 22.6 (21.5, 23.8) | 24.4 (23.2, 25.7) |
| urban                                 | 19.2 (18.2, 20.1)                     | 15.0 (13.9, 16.1) | 17.5 (16.5, 18.5) | 21.8 (20.8, 22.8) | 23.5 (22.5, 24.5) | 20.3 (19.3, 21.3)                     | 16.1 (14.9, 17.4) | 18.6 (17.5, 19.7) | 22.9 (21.8, 23.9) | 24.6 (23.5, 25.7) |
| urban-rural difference                | 0.0 (-0.6, 0.7)                       | 0.1 (-0.7, 0.9)   | 0.0 (-0.6, 0.7)   | 0.0 (-0.7, 0.7)   | -0.1 (-0.9, 0.8)  | 0.3 (-0.3, 0.8)                       | 0.4 (-0.4, 1.1)   | 0.3 (-0.3, 0.9)   | 0.2 (-0.4, 0.8)   | 0.2 (-0.6, 0.9)   |
| <b>Syrian Arab Republic</b>           |                                       |                   |                   |                   |                   |                                       |                   |                   |                   |                   |
| rural                                 | 18.8 (16.9, 20.7)                     | 15.2 (13.1, 17.4) | 17.2 (15.4, 19.1) | 21.2 (19.2, 23.2) | 22.3 (19.5, 25.1) | 19.7 (17.8, 21.6)                     | 16.2 (14.0, 18.3) | 18.2 (16.3, 20.0) | 22.1 (20.2, 24.1) | 23.2 (20.5, 26.0) |
| urban                                 | 18.9 (17.0, 20.8)                     | 15.3 (13.2, 17.5) | 17.4 (15.5, 19.3) | 21.3 (19.3, 23.3) | 22.4 (19.6, 25.2) | 20.2 (18.3, 22.0)                     | 16.6 (14.4, 18.8) | 18.6 (16.8, 20.4) | 22.6 (20.6, 24.5) | 23.7 (21.0, 26.4) |
| urban-rural difference                | 0.1 (-0.5, 0.8)                       | 0.1 (-0.7, 0.9)   | 0.1 (-0.5, 0.8)   | 0.1 (-0.6, 0.9)   | 0.2 (-0.8, 1.0)   | 0.4 (-0.2, 1.1)                       | 0.4 (-0.4, 1.2)   | 0.4 (-0.2, 1.1)   | 0.5 (-0.3, 1.2)   | 0.5 (-0.4, 1.3)   |
| <b>Tunisia</b>                        |                                       |                   |                   |                   |                   |                                       |                   |                   |                   |                   |
| rural                                 | 17.9 (16.8, 19.0)                     | 14.8 (13.7, 16.0) | 16.0 (14.9, 17.1) | 20.2 (19.1, 21.4) | 22.0 (20.8, 23.2) | 19.2 (17.9, 20.4)                     | 16.1 (14.8, 17.4) | 17.3 (16.0, 18.6) | 21.5 (20.2, 22.8) | 23.3 (21.9, 24.6) |
| urban                                 | 18.0 (16.9, 19.1)                     | 14.8 (13.7, 16.0) | 16.0 (15.0, 17.1) | 20.3 (19.2, 21.4) | 22.1 (20.9, 23.3) | 19.5 (18.2, 20.7)                     | 16.4 (15.1, 17.7) | 17.6 (16.3, 18.8) | 21.8 (20.6, 23.1) | 23.6 (22.3, 25.0) |
| urban-rural difference                | 0.1 (-0.4, 0.5)                       | 0.0 (-0.5, 0.5)   | 0.0 (-0.4, 0.5)   | 0.1 (-0.4, 0.6)   | 0.1 (-0.4, 0.7)   | 0.3 (-0.2, 0.9)                       | 0.3 (-0.4, 0.9)   | 0.3 (-0.3, 0.9)   | 0.3 (-0.2, 0.9)   | 0.4 (-0.2, 1.0)   |
| <b>Turkey</b>                         |                                       |                   |                   |                   |                   |                                       |                   |                   |                   |                   |
| rural                                 | 18.2 (16.9, 19.6)                     | 14.4 (13.0, 15.9) | 16.8 (15.4, 18.2) | 20.7 (19.4, 22.1) | 21.5 (20.2, 23.0) | 19.2 (18.4, 19.9)                     | 15.4 (14.5, 16.2) | 17.7 (17.0, 18.5) | 21.6 (20.8, 22.5) | 22.5 (21.6, 23.4) |
| urban                                 | 18.3 (17.0, 19.6)                     | 14.7 (13.2, 16.2) | 16.9 (15.6, 18.3) | 20.6 (19.3, 22.0) | 21.3 (20.0, 22.8) | 19.6 (18.9, 20.3)                     | 16.0 (15.2, 16.8) | 18.2 (17.4, 19.0) | 21.9 (21.2, 22.7) | 22.6 (21.7, 23.5) |
| urban-rural difference                | 0.1 (-0.5, 0.6)                       | 0.3 (-0.4, 1.0)   | 0.1 (-0.5, 0.7)   | 0.0 (-0.6, 0.5)   | -0.2 (-0.9, 0.5)  | 0.4 (0.0, 0.8)                        | 0.6 (0.2, 1.1)    | 0.5 (0.1, 0.8)    | 0.3 (-0.1, 0.7)   | 0.2 (-0.4, 0.7)   |
| <b>United Arab Emirates</b>           |                                       |                   |                   |                   |                   |                                       |                   |                   |                   |                   |
| rural                                 | 18.9 (17.5, 20.3)                     | 15.8 (13.9, 17.7) | 17.9 (16.4, 19.3) | 21.1 (19.7, 22.6) | 20.5 (18.9, 22.0) | 20.2 (19.2, 21.2)                     | 17.1 (15.5, 18.6) | 19.1 (18.1, 20.2) | 22.4 (21.4, 23.4) | 21.7 (20.7, 22.8) |
| urban                                 | 19.5 (18.1, 20.9)                     | 15.9 (14.0, 17.7) | 18.4 (17.0, 19.8) | 22.1 (20.7, 23.4) | 21.7 (20.2, 23.3) | 21.3 (20.4, 22.2)                     | 17.6 (16.1, 19.1) | 20.1 (19.2, 21.0) | 23.8 (23.0, 24.6) | 23.5 (22.4, 24.6) |
| urban-rural difference                | 0.7 (0.0, 1.4)                        | 0.1 (-0.9, 1.0)   | 0.5 (-0.2, 1.2)   | 0.9 (0.2, 1.6)    | 1.3 (0.4, 2.1)    | 1.1 (0.5, 1.8)                        | 0.5 (-0.3, 1.4)   | 1.0 (0.3, 1.7)    | 1.4 (0.8, 2.1)    | 1.7 (1.0, 2.6)    |
| <b>Yemen</b>                          |                                       |                   |                   |                   |                   |                                       |                   |                   |                   |                   |
| rural                                 | 17.4 (16.0, 18.8)                     | 14.9 (13.4, 16.3) | 15.9 (14.5, 17.3) | 19.4 (18.0, 20.8) | 20.5 (19.1, 21.9) | 17.8 (16.7, 18.8)                     | 15.2 (14.1, 16.4) | 16.3 (15.2, 17.3) | 19.7 (18.7, 20.8) | 20.9 (19.8, 22.0) |
| urban                                 | 17.6 (16.3, 19.0)                     | 14.9 (13.5, 16.4) | 16.1 (14.7, 17.5) | 19.7 (18.4, 21.1) | 21.0 (19.6, 22.5) | 18.5 (17.4, 19.6)                     | 15.8 (14.6, 16.9) | 16.9 (15.9, 18.0) | 20.6 (19.5, 21.7) | 21.9 (20.7, 23.0) |
| urban-rural difference                | 0.3 (-0.3, 0.8)                       | 0.1 (-0.6, 0.7)   | 0.2 (-0.4, 0.7)   | 0.4 (-0.2, 0.9)   | 0.5 (-0.2, 1.1)   | 0.7 (0.3, 1.2)                        | 0.5 (-0.1, 1.1)   | 0.7 (0.2, 1.2)    | 0.8 (0.4, 1.3)    | 0.9 (0.5, 1.5)    |
| <b>East and southeast Asia</b>        |                                       |                   |                   |                   |                   |                                       |                   |                   |                   |                   |
| <i>East Asia</i>                      |                                       |                   |                   |                   |                   |                                       |                   |                   |                   |                   |
| <b>China</b>                          |                                       |                   |                   |                   |                   |                                       |                   |                   |                   |                   |
| rural                                 | 17.6 (17.2, 17.9)                     | 14.9 (14.5, 15.2) | 16.2 (15.8, 16.5) | 19.6 (19.2, 19.9) | 20.6 (20.2, 21.0) | 18.9 (18.1, 19.6)                     | 16.1 (15.4, 16.9) | 17.4 (16.7, 18.2) | 20.9 (20.1, 21.6) | 21.9 (21.2, 22.7) |
| urban                                 | 17.8 (17.4, 18.1)                     | 15.3 (14.9, 15.7) | 16.4 (16.1, 16.8) | 19.7 (19.3, 20.0) | 20.6 (20.2, 21.0) | 19.2 (18.5, 20.0)                     | 16.7 (16.0, 17.5) | 17.9 (17.1, 18.6) | 21.1 (20.4, 21.9) | 22.0 (21.3, 22.8) |
| urban-rural difference                | 0.2 (0.0, 0.4)                        | 0.4 (0.2, 0.7)    | 0.3 (0.1, 0.5)    | 0.1 (-0.1, 0.3)   | 0.0 (-0.3, 0.2)   | 0.4 (0.1, 0.6)                        | 0.6 (0.3, 0.9)    | 0.4 (0.2, 0.7)    | 0.3 (0.0, 0.5)    | 0.1 (-0.1, 0.4)   |



| Girls                    | Mean BMI in 1990 (kg/m <sup>2</sup> ) |                   |                   |                   |                   | Mean BMI in 2020 (kg/m <sup>2</sup> ) |                   |                   |                   |                   |
|--------------------------|---------------------------------------|-------------------|-------------------|-------------------|-------------------|---------------------------------------|-------------------|-------------------|-------------------|-------------------|
|                          | Age-standardised                      | 5 years           | 10 years          | 15 years          | 19 years          | Age-standardised                      | 5 years           | 10 years          | 15 years          | 19 years          |
| <b>North Korea</b>       |                                       |                   |                   |                   |                   |                                       |                   |                   |                   |                   |
| rural                    | 17.6 (15.5, 19.7)                     | 14.5 (12.1, 17.0) | 16.2 (14.1, 18.2) | 19.6 (17.5, 21.8) | 20.7 (17.6, 23.7) | 18.6 (16.5, 20.7)                     | 15.6 (13.2, 18.0) | 17.3 (15.2, 19.3) | 20.7 (18.6, 22.8) | 21.8 (18.7, 24.8) |
| urban                    | 17.8 (15.7, 19.9)                     | 14.9 (12.6, 17.3) | 16.5 (14.4, 18.6) | 19.8 (17.6, 21.9) | 20.7 (17.7, 23.8) | 19.0 (16.9, 21.0)                     | 16.1 (13.7, 18.5) | 17.6 (15.6, 19.7) | 20.9 (18.8, 23.1) | 21.9 (18.8, 25.0) |
| urban-rural difference   | 0.2 (-0.5, 0.9)                       | 0.4 (-0.4, 1.2)   | 0.3 (-0.4, 1.0)   | 0.1 (-0.6, 0.9)   | 0.0 (-0.9, 1.0)   | 0.3 (-0.3, 1.0)                       | 0.5 (-0.3, 1.3)   | 0.4 (-0.3, 1.0)   | 0.2 (-0.5, 1.0)   | 0.1 (-0.8, 1.0)   |
| <b>Taiwan</b>            |                                       |                   |                   |                   |                   |                                       |                   |                   |                   |                   |
| rural                    | 17.9 (16.9, 18.9)                     | 14.4 (13.4, 15.5) | 16.7 (15.7, 17.7) | 20.0 (19.0, 21.0) | 21.0 (19.7, 22.1) | 18.9 (18.3, 19.5)                     | 15.4 (14.7, 16.2) | 17.7 (17.0, 18.4) | 21.0 (20.4, 21.5) | 21.9 (21.0, 22.9) |
| urban                    | 18.0 (17.1, 19.0)                     | 14.7 (13.7, 15.7) | 16.9 (16.0, 17.8) | 20.1 (19.1, 21.0) | 21.0 (19.8, 22.1) | 19.0 (18.4, 19.6)                     | 15.6 (14.9, 16.4) | 17.9 (17.2, 18.5) | 21.0 (20.4, 21.6) | 21.9 (21.0, 22.8) |
| urban-rural difference   | 0.2 (-0.5, 0.8)                       | 0.3 (-0.5, 1.0)   | 0.2 (-0.4, 0.9)   | 0.1 (-0.6, 0.8)   | 0.0 (-0.7, 0.8)   | 0.1 (-0.3, 0.5)                       | 0.2 (-0.4, 0.8)   | 0.1 (-0.3, 0.6)   | 0.1 (-0.4, 0.5)   | 0.0 (-0.6, 0.6)   |
| <b>Southeast Asia</b>    |                                       |                   |                   |                   |                   |                                       |                   |                   |                   |                   |
| <b>Brunei Darussalam</b> |                                       |                   |                   |                   |                   |                                       |                   |                   |                   |                   |
| rural                    | 18.4 (16.9, 19.8)                     | 14.7 (13.1, 16.2) | 17.0 (15.5, 18.4) | 20.7 (19.3, 22.1) | 21.5 (19.7, 23.1) | 20.2 (19.4, 20.9)                     | 16.5 (15.5, 17.5) | 18.8 (18.0, 19.6) | 22.5 (21.8, 23.3) | 23.3 (22.2, 24.4) |
| urban                    | 18.7 (17.2, 20.1)                     | 15.2 (13.6, 16.7) | 17.4 (15.9, 18.8) | 20.9 (19.4, 22.4) | 21.5 (19.8, 23.2) | 20.8 (20.1, 21.4)                     | 17.3 (16.3, 18.3) | 19.5 (18.8, 20.2) | 23.1 (22.4, 23.7) | 23.7 (22.6, 24.7) |
| urban-rural difference   | 0.3 (-0.3, 0.9)                       | 0.5 (-0.2, 1.2)   | 0.3 (-0.2, 1.0)   | 0.2 (-0.5, 0.9)   | 0.1 (-0.7, 0.9)   | 0.6 (0.1, 1.1)                        | 0.8 (0.2, 1.5)    | 0.7 (0.1, 1.2)    | 0.5 (-0.1, 1.1)   | 0.4 (-0.4, 1.1)   |
| <b>Cambodia</b>          |                                       |                   |                   |                   |                   |                                       |                   |                   |                   |                   |
| rural                    | 16.7 (15.4, 18.0)                     | 13.5 (11.7, 15.3) | 15.1 (13.8, 16.4) | 18.9 (17.6, 20.1) | 20.0 (18.8, 21.3) | 17.5 (16.5, 18.5)                     | 14.3 (12.7, 15.9) | 15.9 (14.8, 17.0) | 19.7 (18.7, 20.6) | 20.9 (19.9, 21.8) |
| urban                    | 16.8 (15.5, 18.1)                     | 14.1 (12.3, 15.8) | 15.4 (14.0, 16.7) | 18.8 (17.6, 20.1) | 19.7 (18.5, 21.0) | 17.8 (16.8, 18.9)                     | 15.1 (13.5, 16.8) | 16.4 (15.3, 17.5) | 19.9 (18.9, 20.8) | 20.8 (19.8, 21.8) |
| urban-rural difference   | 0.1 (-0.3, 0.7)                       | 0.6 (-0.1, 1.4)   | 0.3 (-0.3, 0.8)   | 0.0 (-0.5, 0.4)   | -0.3 (-0.8, 0.2)  | 0.4 (-0.1, 0.8)                       | 0.8 (0.1, 1.6)    | 0.5 (0.0, 1.0)    | 0.2 (-0.2, 0.6)   | -0.1 (-0.5, 0.4)  |
| <b>Indonesia</b>         |                                       |                   |                   |                   |                   |                                       |                   |                   |                   |                   |
| rural                    | 17.2 (16.4, 18.0)                     | 14.3 (13.6, 15.1) | 15.7 (14.9, 16.4) | 19.3 (18.5, 20.1) | 20.2 (19.4, 21.0) | 18.7 (18.1, 19.3)                     | 15.9 (15.2, 16.5) | 17.2 (16.6, 17.8) | 20.8 (20.2, 21.4) | 21.7 (21.1, 22.4) |
| urban                    | 17.4 (16.7, 18.2)                     | 14.6 (13.9, 15.4) | 15.9 (15.2, 16.7) | 19.5 (18.8, 20.3) | 20.5 (19.7, 21.3) | 19.1 (18.5, 19.7)                     | 16.3 (15.7, 16.9) | 17.6 (17.0, 18.2) | 21.2 (20.6, 21.8) | 22.2 (21.5, 22.8) |
| urban-rural difference   | 0.3 (-0.1, 0.6)                       | 0.3 (-0.1, 0.6)   | 0.3 (-0.1, 0.6)   | 0.3 (-0.1, 0.6)   | 0.2 (-0.1, 0.6)   | 0.4 (0.1, 0.7)                        | 0.4 (0.1, 0.7)    | 0.4 (0.1, 0.7)    | 0.4 (0.1, 0.7)    | 0.4 (0.1, 0.7)    |
| <b>Lao PDR</b>           |                                       |                   |                   |                   |                   |                                       |                   |                   |                   |                   |
| rural                    | 16.9 (15.5, 18.4)                     | 13.8 (11.9, 15.7) | 15.4 (13.9, 17.0) | 19.1 (17.7, 20.5) | 20.3 (18.8, 21.8) | 17.8 (16.6, 19.1)                     | 14.7 (12.8, 16.5) | 16.3 (14.9, 17.7) | 20.0 (18.8, 21.2) | 21.2 (19.9, 22.4) |
| urban                    | 17.0 (15.6, 18.4)                     | 14.2 (12.3, 16.1) | 15.6 (14.1, 17.1) | 19.0 (17.6, 20.5) | 20.0 (18.5, 21.6) | 18.1 (16.8, 19.4)                     | 15.3 (13.5, 17.1) | 16.7 (15.3, 18.1) | 20.1 (18.9, 21.4) | 21.2 (19.8, 22.4) |
| urban-rural difference   | 0.1 (-0.5, 0.7)                       | 0.4 (-0.4, 1.1)   | 0.2 (-0.5, 0.7)   | -0.1 (-0.7, 0.5)  | -0.3 (-1.0, 0.5)  | 0.3 (-0.3, 0.9)                       | 0.6 (-0.1, 1.4)   | 0.4 (-0.2, 1.0)   | 0.2 (-0.4, 0.7)   | 0.0 (-0.8, 0.7)   |
| <b>Malaysia</b>          |                                       |                   |                   |                   |                   |                                       |                   |                   |                   |                   |
| rural                    | 17.6 (16.6, 18.7)                     | 13.5 (12.4, 14.6) | 16.3 (15.2, 17.4) | 20.1 (19.0, 21.2) | 21.1 (20.1, 22.2) | 19.3 (18.7, 19.8)                     | 15.2 (14.6, 15.8) | 17.9 (17.4, 18.5) | 21.7 (21.2, 22.3) | 22.7 (22.1, 23.4) |
| urban                    | 17.8 (16.7, 18.8)                     | 13.9 (12.8, 15.0) | 16.5 (15.4, 17.5) | 20.1 (19.1, 21.1) | 20.9 (20.0, 22.0) | 19.6 (19.0, 20.1)                     | 15.7 (15.1, 16.3) | 18.3 (17.7, 18.8) | 21.9 (21.4, 22.5) | 22.8 (22.1, 23.4) |
| urban-rural difference   | 0.1 (-0.3, 0.6)                       | 0.4 (-0.1, 0.9)   | 0.2 (-0.2, 0.7)   | 0.0 (-0.4, 0.5)   | -0.1 (-0.6, 0.4)  | 0.3 (0.0, 0.6)                        | 0.5 (0.2, 0.9)    | 0.4 (0.1, 0.6)    | 0.2 (-0.2, 0.5)   | 0.0 (-0.4, 0.4)   |
| <b>Maldives</b>          |                                       |                   |                   |                   |                   |                                       |                   |                   |                   |                   |
| rural                    | 17.0 (15.5, 18.4)                     | 13.8 (11.9, 15.7) | 15.5 (14.0, 17.0) | 19.1 (17.7, 20.5) | 20.3 (18.8, 21.9) | 18.2 (17.2, 19.1)                     | 15.0 (13.5, 16.6) | 16.7 (15.6, 17.8) | 20.3 (19.4, 21.1) | 21.5 (20.5, 22.5) |
| urban                    | 17.0 (15.6, 18.5)                     | 14.3 (12.4, 16.2) | 15.7 (14.2, 17.2) | 19.0 (17.6, 20.4) | 20.0 (18.4, 21.6) | 18.4 (17.4, 19.4)                     | 15.6 (14.1, 17.3) | 17.1 (15.9, 18.2) | 20.4 (19.4, 21.2) | 21.4 (20.3, 22.4) |
| urban-rural difference   | 0.1 (-0.5, 0.7)                       | 0.5 (-0.3, 1.3)   | 0.2 (-0.4, 0.9)   | -0.1 (-0.7, 0.6)  | -0.3 (-1.1, 0.5)  | 0.2 (-0.3, 0.8)                       | 0.6 (-0.1, 1.4)   | 0.4 (-0.2, 0.9)   | 0.1 (-0.5, 0.6)   | -0.1 (-0.8, 0.5)  |
| <b>Myanmar</b>           |                                       |                   |                   |                   |                   |                                       |                   |                   |                   |                   |
| rural                    | 16.7 (15.3, 18.1)                     | 13.7 (11.7, 15.5) | 15.3 (13.9, 16.8) | 18.8 (17.4, 20.2) | 19.5 (18.1, 20.9) | 17.8 (16.8, 18.8)                     | 14.8 (13.2, 16.4) | 16.5 (15.4, 17.6) | 19.9 (19.1, 20.8) | 20.6 (19.7, 21.5) |
| urban                    | 16.9 (15.5, 18.3)                     | 14.1 (12.2, 16.1) | 15.6 (14.1, 17.1) | 18.9 (17.5, 20.3) | 19.5 (18.0, 20.9) | 18.3 (17.4, 19.3)                     | 15.5 (13.9, 17.2) | 17.1 (16.0, 18.2) | 20.3 (19.5, 21.2) | 20.9 (20.0, 21.8) |
| urban-rural difference   | 0.2 (-0.3, 0.8)                       | 0.5 (-0.3, 1.2)   | 0.3 (-0.3, 0.9)   | 0.1 (-0.5, 0.7)   | 0.0 (-0.7, 0.7)   | 0.5 (0.1, 1.0)                        | 0.8 (0.0, 1.5)    | 0.6 (0.1, 1.1)    | 0.4 (0.0, 0.9)    | 0.3 (-0.2, 0.8)   |
| <b>Philippines</b>       |                                       |                   |                   |                   |                   |                                       |                   |                   |                   |                   |
| rural                    | 17.0 (16.1, 17.9)                     | 14.2 (13.2, 15.1) | 15.4 (14.5, 16.3) | 19.0 (18.1, 20.0) | 20.2 (19.2, 21.1) | 17.8 (17.3, 18.3)                     | 15.0 (14.5, 15.6) | 16.2 (15.7, 16.8) | 19.9 (19.3, 20.4) | 21.0 (20.4, 21.6) |
| urban                    | 17.1 (16.2, 18.1)                     | 14.5 (13.6, 15.5) | 15.6 (14.7, 16.6) | 19.1 (18.2, 20.1) | 20.2 (19.2, 21.1) | 18.3 (17.7, 18.8)                     | 15.7 (15.1, 16.2) | 16.7 (16.2, 17.3) | 20.3 (19.7, 20.8) | 21.3 (20.7, 21.9) |
| urban-rural difference   | 0.2 (-0.3, 0.6)                       | 0.3 (-0.1, 0.8)   | 0.2 (-0.2, 0.6)   | 0.1 (-0.4, 0.5)   | 0.0 (-0.5, 0.4)   | 0.5 (0.2, 0.8)                        | 0.6 (0.3, 1.0)    | 0.5 (0.2, 0.8)    | 0.4 (0.1, 0.7)    | 0.3 (-0.1, 0.6)   |
| <b>Thailand</b>          |                                       |                   |                   |                   |                   |                                       |                   |                   |                   |                   |
| rural                    | 17.3 (16.7, 17.9)                     | 13.9 (13.3, 14.5) | 15.8 (15.3, 16.4) | 19.5 (18.9, 20.1) | 20.7 (20.1, 21.4) | 18.8 (18.3, 19.3)                     | 15.4 (14.8, 15.9) | 17.3 (16.8, 17.8) | 21.0 (20.5, 21.5) | 22.2 (21.6, 22.8) |
| urban                    | 17.6 (17.1, 18.2)                     | 14.5 (13.9, 15.1) | 16.2 (15.7, 16.8) | 19.7 (19.1, 20.2) | 20.8 (20.1, 21.4) | 19.2 (18.7, 19.7)                     | 16.1 (15.5, 16.7) | 17.9 (17.3, 18.4) | 21.3 (20.8, 21.8) | 22.4 (21.8, 23.0) |
| urban-rural difference   | 0.3 (0.0, 0.6)                        | 0.6 (0.2, 1.0)    | 0.4 (0.1, 0.7)    | 0.2 (-0.2, 0.5)   | 0.0 (-0.4, 0.5)   | 0.4 (0.1, 0.8)                        | 0.7 (0.3, 1.1)    | 0.5 (0.1, 0.9)    | 0.3 (-0.1, 0.7)   | 0.2 (-0.3, 0.6)   |
| <b>Timor-Leste</b>       |                                       |                   |                   |                   |                   |                                       |                   |                   |                   |                   |
| rural                    | 16.1 (14.7, 17.6)                     | 13.7 (12.3, 15.2) | 14.5 (13.2, 16.0) | 18.1 (16.8, 19.6) | 19.1 (17.7, 20.6) | 16.6 (16.0, 17.3)                     | 14.2 (13.4, 15.0) | 15.1 (14.3, 15.7) | 18.6 (17.9, 19.3) | 19.6 (18.9, 20.3) |
| urban                    | 16.2 (14.9, 17.7)                     | 14.1 (12.6, 15.6) | 14.7 (13.3, 16.2) | 18.1 (16.7, 19.5) | 18.9 (17.5, 20.4) | 17.0 (16.2, 17.7)                     | 14.9 (13.9, 15.9) | 15.5 (14.7, 16.3) | 18.9 (18.1, 19.6) | 19.7 (18.9, 20.4) |
| urban-rural difference   | 0.1 (-0.5, 0.7)                       | 0.4 (-0.3, 1.2)   | 0.2 (-0.4, 0.8)   | 0.0 (-0.6, 0.6)   | -0.2 (-0.8, 0.4)  | 0.4 (-0.1, 0.8)                       | 0.7 (0.0, 1.4)    | 0.4 (-0.1, 0.9)   | 0.2 (-0.2, 0.6)   | 0.0 (-0.4, 0.5)   |
| <b>Viet Nam</b>          |                                       |                   |                   |                   |                   |                                       |                   |                   |                   |                   |
| rural                    | 15.9 (15.3, 16.4)                     | 13.5 (13.0, 14.1) | 14.3 (13.8, 14.9) | 17.7 (17.2, 18.3) | 19.0 (18.5, 19.6) | 16.8 (16.3, 17.4)                     | 14.5 (13.9, 15.1) | 15.3 (14.7, 15.9) | 18.7 (18.1, 19.3) | 20.0 (19.4, 20.6) |

| Girls                                         | Mean BMI in 1990 (kg/m <sup>2</sup> ) |                   |                   |                   |                   | Mean BMI in 2020 (kg/m <sup>2</sup> ) |                   |                   |                   |                   |
|-----------------------------------------------|---------------------------------------|-------------------|-------------------|-------------------|-------------------|---------------------------------------|-------------------|-------------------|-------------------|-------------------|
|                                               | Age-standardised                      | 5 years           | 10 years          | 15 years          | 19 years          | Age-standardised                      | 5 years           | 10 years          | 15 years          | 19 years          |
| urban                                         | 16.0 (15.5, 16.6)                     | 14.0 (13.4, 14.5) | 14.5 (14.0, 15.1) | 17.7 (17.2, 18.3) | 18.9 (18.3, 19.5) | 17.7 (17.1, 18.2)                     | 15.6 (15.0, 16.2) | 16.2 (15.6, 16.8) | 19.4 (18.8, 20.0) | 20.5 (19.9, 21.1) |
| urban-rural difference                        | 0.1 (-0.2, 0.5)                       | 0.4 (0.0, 0.8)    | 0.2 (-0.1, 0.5)   | 0.0 (-0.3, 0.4)   | -0.1 (-0.5, 0.2)  | 0.8 (0.5, 1.2)                        | 1.1 (0.7, 1.5)    | 0.9 (0.6, 1.3)    | 0.7 (0.4, 1.1)    | 0.6 (0.2, 0.9)    |
| <b>High-income Asia Pacific</b>               |                                       |                   |                   |                   |                   |                                       |                   |                   |                   |                   |
| Japan                                         |                                       |                   |                   |                   |                   |                                       |                   |                   |                   |                   |
| rural                                         | 18.5 (18.3, 18.8)                     | 15.3 (15.1, 15.5) | 17.3 (17.1, 17.5) | 20.8 (20.6, 21.0) | 20.8 (20.5, 21.1) | 18.7 (18.4, 19.0)                     | 15.5 (15.2, 15.8) | 17.5 (17.2, 17.7) | 21.0 (20.7, 21.2) | 21.0 (20.7, 21.3) |
| urban                                         | 18.4 (18.2, 18.6)                     | 15.4 (15.2, 15.6) | 17.2 (17.0, 17.4) | 20.6 (20.3, 20.8) | 20.4 (20.2, 20.7) | 18.5 (18.3, 18.8)                     | 15.5 (15.3, 15.8) | 17.4 (17.1, 17.6) | 20.7 (20.4, 21.0) | 20.6 (20.3, 20.9) |
| urban-rural difference                        | -0.1 (-0.3, 0.0)                      | 0.1 (-0.1, 0.2)   | -0.1 (-0.2, 0.1)  | -0.2 (-0.4, -0.1) | -0.4 (-0.5, -0.2) | -0.2 (-0.3, -0.1)                     | 0.0 (-0.1, 0.2)   | -0.1 (-0.3, 0.0)  | -0.3 (-0.4, -0.2) | -0.4 (-0.6, -0.3) |
| Singapore                                     |                                       |                   |                   |                   |                   |                                       |                   |                   |                   |                   |
| rural                                         | 18.2 (16.4, 19.9)                     | 15.0 (12.8, 17.1) | 17.0 (15.1, 18.8) | 20.3 (18.5, 22.0) | 20.8 (18.8, 22.9) | 19.0 (17.4, 20.6)                     | 15.8 (13.7, 17.8) | 17.8 (16.0, 19.6) | 21.2 (19.5, 22.7) | 21.7 (19.8, 23.5) |
| urban                                         | 18.3 (16.5, 20.0)                     | 15.1 (12.9, 17.3) | 17.1 (15.2, 19.0) | 20.4 (18.7, 22.1) | 20.9 (18.9, 22.9) | 19.1 (17.6, 20.6)                     | 15.9 (13.8, 17.9) | 17.9 (16.2, 19.6) | 21.2 (19.7, 22.7) | 21.7 (20.1, 23.3) |
| urban-rural difference                        | 0.1 (-0.6, 0.8)                       | 0.2 (-0.7, 1.0)   | 0.1 (-0.6, 0.8)   | 0.1 (-0.7, 0.8)   | 0.1 (-0.8, 1.0)   | 0.1 (-0.6, 0.8)                       | 0.1 (-0.7, 1.0)   | 0.1 (-0.6, 0.8)   | 0.1 (-0.6, 0.8)   | 0.0 (-0.8, 0.9)   |
| South Korea                                   |                                       |                   |                   |                   |                   |                                       |                   |                   |                   |                   |
| rural                                         | 18.3 (17.3, 19.3)                     | 15.2 (14.2, 16.1) | 17.3 (16.3, 18.3) | 20.2 (19.3, 21.2) | 20.6 (19.6, 21.6) | 19.2 (18.8, 19.5)                     | 16.0 (15.6, 16.4) | 18.2 (17.8, 18.5) | 21.1 (20.7, 21.5) | 21.5 (21.1, 21.9) |
| urban                                         | 18.6 (17.6, 19.5)                     | 15.2 (14.2, 16.1) | 17.5 (16.6, 18.5) | 20.6 (19.7, 21.6) | 21.1 (20.1, 22.1) | 19.3 (19.0, 19.7)                     | 16.0 (15.6, 16.3) | 18.3 (18.0, 18.6) | 21.4 (21.1, 21.7) | 21.9 (21.5, 22.3) |
| urban-rural difference                        | 0.3 (-0.1, 0.6)                       | 0.0 (-0.4, 0.4)   | 0.2 (-0.2, 0.6)   | 0.4 (0.0, 0.7)    | 0.5 (0.1, 0.9)    | 0.2 (0.0, 0.4)                        | -0.1 (-0.3, 0.2)  | 0.1 (-0.1, 0.3)   | 0.3 (0.0, 0.5)    | 0.4 (0.1, 0.7)    |
| <b>High-income western</b>                    |                                       |                   |                   |                   |                   |                                       |                   |                   |                   |                   |
| <i>High-income English-speaking countries</i> |                                       |                   |                   |                   |                   |                                       |                   |                   |                   |                   |
| Australia                                     |                                       |                   |                   |                   |                   |                                       |                   |                   |                   |                   |
| rural                                         | 19.6 (18.8, 20.5)                     | 15.7 (14.8, 16.6) | 18.3 (17.4, 19.1) | 21.9 (21.1, 22.8) | 23.2 (22.3, 24.2) | 20.6 (20.1, 21.1)                     | 16.6 (16.0, 17.2) | 19.2 (18.6, 19.7) | 22.9 (22.3, 23.4) | 24.1 (23.5, 24.8) |
| urban                                         | 19.5 (18.7, 20.4)                     | 15.6 (14.7, 16.4) | 18.1 (17.3, 19.0) | 21.8 (21.0, 22.7) | 23.1 (22.2, 24.1) | 20.7 (20.2, 21.2)                     | 16.8 (16.2, 17.4) | 19.3 (18.8, 19.9) | 23.1 (22.6, 23.6) | 24.4 (23.8, 25.0) |
| urban-rural difference                        | -0.1 (-0.5, 0.3)                      | -0.2 (-0.6, 0.3)  | -0.1 (-0.5, 0.3)  | -0.1 (-0.5, 0.4)  | -0.1 (-0.6, 0.5)  | 0.2 (-0.1, 0.5)                       | 0.1 (-0.2, 0.5)   | 0.2 (-0.1, 0.4)   | 0.2 (-0.1, 0.5)   | 0.2 (-0.2, 0.6)   |
| Canada                                        |                                       |                   |                   |                   |                   |                                       |                   |                   |                   |                   |
| rural                                         | 19.0 (18.2, 19.8)                     | 15.0 (14.1, 16.0) | 17.5 (16.7, 18.4) | 21.4 (20.6, 22.2) | 22.8 (22.0, 23.7) | 19.7 (19.0, 20.4)                     | 15.7 (14.9, 16.5) | 18.2 (17.5, 18.9) | 22.0 (21.3, 22.8) | 23.5 (22.7, 24.4) |
| urban                                         | 18.7 (18.0, 19.5)                     | 14.8 (14.0, 15.6) | 17.3 (16.5, 18.0) | 21.1 (20.3, 21.8) | 22.5 (21.7, 23.3) | 19.7 (19.2, 20.2)                     | 15.8 (15.2, 16.3) | 18.2 (17.7, 18.7) | 22.0 (21.5, 22.6) | 23.5 (22.8, 24.1) |
| urban-rural difference                        | -0.3 (-0.8, 0.3)                      | -0.2 (-1.0, 0.6)  | -0.3 (-0.8, 0.3)  | -0.3 (-0.9, 0.3)  | -0.4 (-1.0, 0.3)  | 0.0 (-0.6, 0.6)                       | 0.1 (-0.7, 0.8)   | 0.0 (-0.6, 0.6)   | 0.0 (-0.6, 0.6)   | -0.1 (-0.8, 0.7)  |
| Ireland                                       |                                       |                   |                   |                   |                   |                                       |                   |                   |                   |                   |
| rural                                         | 18.9 (17.7, 20.0)                     | 15.4 (14.2, 16.7) | 17.5 (16.3, 18.7) | 21.1 (19.8, 22.3) | 22.1 (20.8, 23.3) | 19.5 (19.1, 19.9)                     | 16.1 (15.6, 16.5) | 18.1 (17.7, 18.5) | 21.7 (21.2, 22.2) | 22.7 (21.9, 23.5) |
| urban                                         | 18.9 (17.7, 20.0)                     | 15.2 (14.0, 16.4) | 17.4 (16.3, 18.6) | 21.2 (19.9, 22.3) | 22.3 (21.0, 23.5) | 19.8 (19.4, 20.1)                     | 16.1 (15.7, 16.6) | 18.3 (17.9, 18.7) | 22.0 (21.6, 22.5) | 23.2 (22.4, 23.9) |
| urban-rural difference                        | 0.0 (-0.5, 0.5)                       | -0.2 (-0.8, 0.3)  | -0.1 (-0.5, 0.4)  | 0.1 (-0.4, 0.6)   | 0.2 (-0.4, 0.9)   | 0.3 (0.0, 0.6)                        | 0.1 (-0.3, 0.4)   | 0.2 (-0.1, 0.5)   | 0.4 (0.0, 0.7)    | 0.5 (-0.1, 1.0)   |
| New Zealand                                   |                                       |                   |                   |                   |                   |                                       |                   |                   |                   |                   |
| rural                                         | 19.0 (18.3, 19.7)                     | 15.0 (14.3, 15.7) | 17.6 (16.8, 18.3) | 21.4 (20.7, 22.1) | 22.4 (21.6, 23.2) | 20.3 (19.9, 20.6)                     | 16.3 (15.9, 16.7) | 18.8 (18.4, 19.2) | 22.7 (22.2, 23.1) | 23.7 (23.1, 24.3) |
| urban                                         | 19.2 (18.6, 19.8)                     | 14.7 (14.1, 15.3) | 17.6 (17.0, 18.2) | 21.8 (21.2, 22.4) | 23.1 (22.5, 23.8) | 21.1 (20.7, 21.4)                     | 16.6 (16.2, 17.0) | 19.5 (19.2, 19.9) | 23.7 (23.4, 24.1) | 25.0 (24.5, 25.6) |
| urban-rural difference                        | 0.2 (-0.3, 0.7)                       | -0.3 (-0.9, 0.2)  | 0.1 (-0.5, 0.5)   | 0.4 (-0.1, 0.9)   | 0.7 (0.1, 1.3)    | 0.8 (0.6, 1.1)                        | 0.3 (0.0, 0.6)    | 0.7 (0.4, 1.0)    | 1.1 (0.7, 1.4)    | 1.4 (0.9, 1.8)    |
| United Kingdom                                |                                       |                   |                   |                   |                   |                                       |                   |                   |                   |                   |
| rural                                         | 19.3 (18.8, 19.8)                     | 15.5 (15.0, 16.1) | 17.9 (17.4, 18.4) | 21.5 (21.0, 22.1) | 22.8 (22.3, 23.3) | 19.7 (19.3, 20.1)                     | 16.0 (15.6, 16.4) | 18.3 (17.9, 18.7) | 21.9 (21.5, 22.3) | 23.2 (22.8, 23.6) |
| urban                                         | 19.3 (18.8, 19.7)                     | 15.3 (14.9, 15.8) | 17.8 (17.4, 18.3) | 21.6 (21.1, 22.1) | 23.0 (22.5, 23.5) | 20.2 (19.8, 20.5)                     | 16.2 (15.9, 16.6) | 18.7 (18.3, 19.1) | 22.5 (22.1, 22.9) | 23.9 (23.5, 24.3) |
| urban-rural difference                        | 0.0 (-0.2, 0.2)                       | -0.2 (-0.4, 0.0)  | -0.1 (-0.3, 0.2)  | 0.1 (-0.2, 0.3)   | 0.2 (-0.1, 0.5)   | 0.5 (0.3, 0.7)                        | 0.3 (0.1, 0.5)    | 0.4 (0.3, 0.6)    | 0.6 (0.4, 0.8)    | 0.7 (0.4, 0.9)    |
| United States of America                      |                                       |                   |                   |                   |                   |                                       |                   |                   |                   |                   |
| rural                                         | 20.1 (19.6, 20.6)                     | 15.3 (14.7, 15.8) | 18.7 (18.2, 19.3) | 22.7 (22.2, 23.3) | 24.2 (23.5, 24.8) | 21.4 (20.9, 21.9)                     | 16.6 (16.0, 17.1) | 20.0 (19.5, 20.6) | 24.0 (23.5, 24.6) | 25.4 (24.8, 26.1) |
| urban                                         | 20.0 (19.4, 20.5)                     | 15.2 (14.6, 15.7) | 18.6 (18.1, 19.2) | 22.6 (22.0, 23.1) | 24.0 (23.4, 24.6) | 21.3 (20.8, 21.8)                     | 16.5 (16.0, 17.0) | 20.0 (19.5, 20.5) | 23.9 (23.4, 24.5) | 25.3 (24.8, 25.9) |
| urban-rural difference                        | -0.1 (-0.4, 0.2)                      | -0.1 (-0.4, 0.2)  | -0.1 (-0.4, 0.2)  | -0.1 (-0.5, 0.2)  | -0.2 (-0.5, 0.2)  | -0.1 (-0.3, 0.2)                      | 0.0 (-0.3, 0.2)   | -0.1 (-0.3, 0.2)  | -0.1 (-0.4, 0.2)  | -0.1 (-0.5, 0.3)  |
| <i>Northwestern Europe</i>                    |                                       |                   |                   |                   |                   |                                       |                   |                   |                   |                   |
| Austria                                       |                                       |                   |                   |                   |                   |                                       |                   |                   |                   |                   |
| rural                                         | 18.1 (17.0, 19.2)                     | 14.3 (13.2, 15.5) | 17.0 (15.9, 18.1) | 20.4 (19.3, 21.5) | 20.8 (19.7, 21.9) | 18.9 (18.4, 19.5)                     | 15.1 (14.5, 15.7) | 17.8 (17.3, 18.4) | 21.2 (20.7, 21.8) | 21.6 (20.8, 22.5) |
| urban                                         | 18.4 (17.2, 19.5)                     | 14.3 (13.1, 15.4) | 17.2 (16.0, 18.3) | 20.8 (19.6, 21.9) | 21.3 (20.2, 22.4) | 19.4 (18.8, 19.9)                     | 15.3 (14.7, 15.9) | 18.2 (17.6, 18.7) | 21.8 (21.2, 22.3) | 22.3 (21.5, 23.2) |
| urban-rural difference                        | 0.2 (-0.4, 0.8)                       | 0.0 (-0.7, 0.6)   | 0.1 (-0.4, 0.7)   | 0.3 (-0.3, 0.9)   | 0.5 (-0.2, 1.1)   | 0.4 (0.1, 0.8)                        | 0.2 (-0.3, 0.6)   | 0.4 (0.0, 0.7)    | 0.5 (0.2, 0.9)    | 0.7 (0.2, 1.2)    |
| Belgium                                       |                                       |                   |                   |                   |                   |                                       |                   |                   |                   |                   |
| rural                                         | 18.9 (17.7, 20.1)                     | 15.6 (14.2, 17.0) | 17.9 (16.6, 19.1) | 20.7 (19.4, 21.9) | 22.2 (20.9, 23.5) | 19.8 (18.9, 20.7)                     | 16.6 (15.6, 17.6) | 18.8 (17.9, 19.7) | 21.6 (20.7, 22.6) | 23.2 (22.2, 24.2) |
| urban                                         | 18.8 (17.6, 20.1)                     | 15.1 (13.8, 16.4) | 17.6 (16.4, 18.9) | 20.8 (19.5, 22.1) | 22.6 (21.3, 24.1) | 19.7 (19.1, 20.5)                     | 16.0 (15.2, 16.8) | 18.6 (17.8, 19.3) | 21.7 (21.0, 22.4) | 23.6 (22.7, 24.4) |
| urban-rural difference                        | -0.1 (-0.7, 0.5)                      | -0.6 (-1.3, 0.2)  | -0.2 (-0.9, 0.4)  | 0.1 (-0.5, 0.8)   | 0.4 (-0.4, 1.2)   | -0.1 (-0.7, 0.5)                      | -0.6 (-1.4, 0.1)  | -0.2 (-0.9, 0.3)  | 0.1 (-0.5, 0.7)   | 0.4 (-0.4, 1.1)   |
| Denmark                                       |                                       |                   |                   |                   |                   |                                       |                   |                   |                   |                   |

| Girls                      | Mean BMI in 1990 (kg/m <sup>2</sup> ) |                   |                   |                   |                   | Mean BMI in 2020 (kg/m <sup>2</sup> ) |                   |                   |                   |                   |
|----------------------------|---------------------------------------|-------------------|-------------------|-------------------|-------------------|---------------------------------------|-------------------|-------------------|-------------------|-------------------|
|                            | Age-standardised                      | 5 years           | 10 years          | 15 years          | 19 years          | Age-standardised                      | 5 years           | 10 years          | 15 years          | 19 years          |
| rural                      | 18.8 (17.9, 19.6)                     | 15.8 (14.9, 16.7) | 17.8 (16.9, 18.6) | 20.6 (19.7, 21.5) | 21.4 (20.3, 22.5) | 18.6 (18.1, 19.2)                     | 15.6 (15.0, 16.2) | 17.6 (17.1, 18.2) | 20.5 (19.8, 21.1) | 21.2 (20.3, 22.2) |
| urban                      | 18.8 (18.1, 19.5)                     | 15.4 (14.7, 16.1) | 17.7 (17.0, 18.3) | 20.8 (20.1, 21.5) | 21.8 (20.8, 22.8) | 18.6 (18.1, 19.2)                     | 15.2 (14.7, 15.8) | 17.5 (17.0, 18.1) | 20.6 (20.0, 21.2) | 21.6 (20.7, 22.5) |
| urban-rural difference     | 0.0 (-0.5, 0.6)                       | -0.4 (-1.0, 0.3)  | -0.1 (-0.7, 0.5)  | 0.2 (-0.4, 0.8)   | 0.4 (-0.3, 1.1)   | 0.0 (-0.4, 0.4)                       | -0.4 (-0.8, 0.0)  | -0.1 (-0.5, 0.2)  | 0.2 (-0.3, 0.6)   | 0.4 (-0.2, 1.0)   |
| <b>Finland</b>             |                                       |                   |                   |                   |                   |                                       |                   |                   |                   |                   |
| rural                      | 19.1 (17.7, 20.5)                     | 15.2 (13.7, 16.6) | 17.6 (16.2, 18.9) | 21.4 (20.0, 22.7) | 23.4 (21.7, 25.0) | 20.2 (19.6, 20.8)                     | 16.2 (15.6, 16.8) | 18.6 (18.1, 19.2) | 22.4 (21.8, 23.0) | 24.4 (23.4, 25.4) |
| urban                      | 19.0 (17.6, 20.4)                     | 15.1 (13.7, 16.5) | 17.5 (16.1, 18.9) | 21.2 (19.9, 22.6) | 23.2 (21.5, 24.8) | 20.0 (19.5, 20.5)                     | 16.1 (15.6, 16.7) | 18.5 (18.0, 19.0) | 22.3 (21.7, 22.8) | 24.2 (23.2, 25.2) |
| urban-rural difference     | -0.1 (-0.7, 0.5)                      | -0.1 (-0.7, 0.6)  | -0.1 (-0.7, 0.5)  | -0.1 (-0.8, 0.5)  | -0.2 (-0.8, 0.5)  | -0.1 (-0.6, 0.3)                      | -0.1 (-0.6, 0.3)  | -0.1 (-0.6, 0.3)  | -0.2 (-0.6, 0.3)  | -0.2 (-0.7, 0.3)  |
| <b>Germany</b>             |                                       |                   |                   |                   |                   |                                       |                   |                   |                   |                   |
| rural                      | 19.0 (17.8, 20.2)                     | 15.2 (14.0, 16.5) | 17.8 (16.6, 19.1) | 21.2 (20.0, 22.4) | 21.8 (20.5, 23.0) | 19.2 (18.5, 20.0)                     | 15.5 (14.7, 16.3) | 18.1 (17.3, 18.8) | 21.4 (20.6, 22.2) | 22.0 (21.0, 23.0) |
| urban                      | 19.1 (17.9, 20.2)                     | 15.0 (13.8, 16.3) | 17.8 (16.6, 19.0) | 21.4 (20.2, 22.6) | 22.2 (20.9, 23.4) | 19.5 (18.8, 20.2)                     | 15.4 (14.7, 16.2) | 18.3 (17.5, 19.0) | 21.8 (21.1, 22.6) | 22.6 (21.6, 23.5) |
| urban-rural difference     | 0.1 (-0.4, 0.6)                       | -0.2 (-0.8, 0.4)  | 0.0 (-0.5, 0.5)   | 0.2 (-0.3, 0.7)   | 0.4 (-0.2, 1.0)   | 0.3 (-0.1, 0.7)                       | 0.0 (-0.5, 0.4)   | 0.2 (-0.2, 0.6)   | 0.4 (0.0, 0.9)    | 0.6 (0.0, 1.1)    |
| <b>Greenland</b>           |                                       |                   |                   |                   |                   |                                       |                   |                   |                   |                   |
| rural                      | 19.6 (18.0, 21.3)                     | 16.1 (14.0, 18.1) | 18.3 (16.5, 20.1) | 21.7 (20.0, 23.4) | 23.2 (21.4, 25.0) | 20.3 (18.7, 21.8)                     | 16.7 (14.7, 18.6) | 18.9 (17.2, 20.6) | 22.3 (20.7, 23.9) | 23.8 (22.2, 25.4) |
| urban                      | 19.7 (18.0, 21.4)                     | 15.9 (13.8, 17.9) | 18.3 (16.5, 20.1) | 21.9 (20.1, 23.6) | 23.5 (21.7, 25.4) | 20.4 (18.8, 22.0)                     | 16.6 (14.7, 18.6) | 19.0 (17.3, 20.7) | 22.6 (21.0, 24.2) | 24.2 (22.5, 25.9) |
| urban-rural difference     | 0.1 (-0.6, 0.7)                       | -0.2 (-1.0, 0.6)  | 0.0 (-0.7, 0.7)   | 0.2 (-0.5, 0.9)   | 0.3 (-0.5, 1.2)   | 0.2 (-0.4, 0.8)                       | -0.1 (-0.9, 0.7)  | 0.1 (-0.5, 0.7)   | 0.3 (-0.4, 0.9)   | 0.4 (-0.4, 1.2)   |
| <b>Iceland</b>             |                                       |                   |                   |                   |                   |                                       |                   |                   |                   |                   |
| rural                      | 18.8 (16.8, 20.8)                     | 15.4 (13.2, 17.6) | 17.7 (15.7, 19.5) | 20.8 (18.8, 22.8) | 21.9 (19.1, 24.8) | 19.4 (17.5, 21.3)                     | 16.0 (13.8, 18.1) | 18.2 (16.3, 20.1) | 21.4 (19.4, 23.4) | 22.5 (19.7, 25.3) |
| urban                      | 18.9 (16.9, 20.8)                     | 15.2 (13.1, 17.4) | 17.6 (15.7, 19.5) | 21.0 (19.0, 22.9) | 22.2 (19.4, 25.0) | 19.6 (17.6, 21.5)                     | 15.9 (13.8, 18.0) | 18.3 (16.5, 20.2) | 21.7 (19.7, 23.6) | 22.9 (20.1, 25.7) |
| urban-rural difference     | 0.0 (-0.6, 0.7)                       | -0.2 (-1.0, 0.6)  | 0.0 (-0.7, 0.6)   | 0.1 (-0.6, 0.9)   | 0.2 (-0.7, 1.2)   | 0.1 (-0.5, 0.8)                       | -0.1 (-0.9, 0.7)  | 0.1 (-0.6, 0.7)   | 0.2 (-0.5, 0.9)   | 0.4 (-0.5, 1.2)   |
| <b>Luxembourg</b>          |                                       |                   |                   |                   |                   |                                       |                   |                   |                   |                   |
| rural                      | 18.7 (17.1, 20.4)                     | 15.4 (13.3, 17.3) | 17.7 (16.0, 19.4) | 20.7 (19.1, 22.4) | 21.4 (19.7, 23.0) | 19.3 (17.8, 20.8)                     | 15.9 (14.0, 17.9) | 18.2 (16.6, 19.8) | 21.3 (19.8, 22.8) | 22.0 (20.4, 23.5) |
| urban                      | 18.8 (17.2, 20.4)                     | 15.2 (13.1, 17.2) | 17.7 (16.0, 19.3) | 21.0 (19.4, 22.5) | 21.8 (20.1, 23.4) | 19.5 (18.1, 21.0)                     | 15.9 (14.0, 17.8) | 18.4 (16.8, 20.0) | 21.6 (20.3, 23.1) | 22.5 (21.0, 24.0) |
| urban-rural difference     | 0.1 (-0.5, 0.7)                       | -0.2 (-1.0, 0.6)  | 0.0 (-0.6, 0.7)   | 0.2 (-0.4, 0.9)   | 0.4 (-0.4, 1.2)   | 0.2 (-0.4, 0.8)                       | -0.1 (-0.8, 0.7)  | 0.1 (-0.5, 0.7)   | 0.3 (-0.3, 1.0)   | 0.5 (-0.2, 1.3)   |
| <b>Netherlands</b>         |                                       |                   |                   |                   |                   |                                       |                   |                   |                   |                   |
| rural                      | 18.6 (17.3, 19.9)                     | 15.5 (14.1, 16.9) | 17.3 (16.0, 18.6) | 20.4 (19.1, 21.8) | 22.0 (20.4, 23.5) | 18.9 (18.0, 19.8)                     | 15.8 (14.7, 16.9) | 17.6 (16.7, 18.5) | 20.8 (19.8, 21.7) | 22.3 (21.0, 23.5) |
| urban                      | 18.6 (17.4, 19.9)                     | 15.3 (14.0, 16.8) | 17.3 (16.0, 18.6) | 20.6 (19.3, 21.9) | 22.2 (20.8, 23.6) | 19.0 (18.1, 19.9)                     | 15.7 (14.6, 16.8) | 17.7 (16.7, 18.6) | 20.9 (20.0, 21.9) | 22.6 (21.4, 23.8) |
| urban-rural difference     | 0.1 (-0.5, 0.6)                       | -0.1 (-0.8, 0.5)  | 0.0 (-0.5, 0.6)   | 0.1 (-0.5, 0.8)   | 0.2 (-0.5, 1.0)   | 0.1 (-0.3, 0.5)                       | -0.1 (-0.7, 0.5)  | 0.0 (-0.4, 0.5)   | 0.2 (-0.3, 0.7)   | 0.3 (-0.4, 1.0)   |
| <b>Norway</b>              |                                       |                   |                   |                   |                   |                                       |                   |                   |                   |                   |
| rural                      | 18.9 (17.7, 20.1)                     | 15.7 (14.3, 17.2) | 17.5 (16.3, 18.7) | 20.8 (19.6, 22.0) | 22.5 (21.3, 23.8) | 19.4 (18.4, 20.3)                     | 16.2 (15.0, 17.4) | 18.0 (17.0, 18.9) | 21.3 (20.2, 22.3) | 23.0 (21.9, 24.1) |
| urban                      | 18.7 (17.5, 19.9)                     | 15.5 (14.2, 16.9) | 17.3 (16.1, 18.5) | 20.6 (19.4, 21.9) | 22.4 (21.1, 23.8) | 19.3 (18.4, 20.1)                     | 16.1 (15.1, 17.1) | 17.9 (16.9, 18.7) | 21.2 (20.2, 22.1) | 23.0 (21.8, 24.1) |
| urban-rural difference     | -0.2 (-0.7, 0.4)                      | -0.2 (-0.9, 0.6)  | -0.2 (-0.8, 0.4)  | -0.1 (-0.8, 0.5)  | -0.1 (-0.9, 0.6)  | -0.1 (-0.6, 0.4)                      | -0.1 (-0.8, 0.6)  | -0.1 (-0.7, 0.4)  | -0.1 (-0.7, 0.5)  | -0.1 (-0.8, 0.7)  |
| <b>Sweden</b>              |                                       |                   |                   |                   |                   |                                       |                   |                   |                   |                   |
| rural                      | 19.1 (18.6, 19.7)                     | 15.8 (15.1, 16.5) | 17.9 (17.4, 18.5) | 21.1 (20.5, 21.7) | 22.3 (21.2, 23.5) | 19.6 (18.9, 20.3)                     | 16.3 (15.5, 17.1) | 18.4 (17.7, 19.1) | 21.6 (20.8, 22.4) | 22.8 (21.5, 24.1) |
| urban                      | 19.0 (18.8, 19.3)                     | 15.5 (15.1, 15.9) | 17.8 (17.5, 18.1) | 21.1 (20.8, 21.4) | 22.4 (21.5, 23.4) | 19.6 (19.0, 20.2)                     | 16.1 (15.5, 16.6) | 18.3 (17.8, 18.9) | 21.7 (21.0, 22.3) | 23.0 (21.9, 24.1) |
| urban-rural difference     | -0.1 (-0.7, 0.5)                      | -0.3 (-1.0, 0.4)  | -0.1 (-0.7, 0.5)  | 0.0 (-0.7, 0.7)   | 0.1 (-0.7, 1.0)   | 0.0 (-0.6, 0.5)                       | -0.2 (-0.9, 0.4)  | -0.1 (-0.6, 0.4)  | 0.1 (-0.6, 0.7)   | 0.2 (-0.6, 1.0)   |
| <b>Switzerland</b>         |                                       |                   |                   |                   |                   |                                       |                   |                   |                   |                   |
| rural                      | 18.4 (17.1, 19.7)                     | 15.4 (14.1, 16.7) | 17.5 (16.3, 18.8) | 20.2 (18.9, 21.5) | 20.6 (19.0, 22.1) | 18.6 (18.0, 19.2)                     | 15.6 (15.0, 16.2) | 17.8 (17.2, 18.4) | 20.4 (19.7, 21.1) | 20.8 (19.8, 21.8) |
| urban                      | 18.5 (17.2, 19.8)                     | 15.1 (13.8, 16.4) | 17.6 (16.3, 18.8) | 20.5 (19.2, 21.8) | 21.1 (19.6, 22.6) | 19.0 (18.4, 19.6)                     | 15.6 (15.0, 16.2) | 18.0 (17.5, 18.6) | 21.0 (20.3, 21.7) | 21.6 (20.6, 22.6) |
| urban-rural difference     | 0.1 (-0.4, 0.6)                       | -0.2 (-0.8, 0.3)  | 0.0 (-0.5, 0.5)   | 0.3 (-0.2, 0.8)   | 0.5 (-0.1, 1.2)   | 0.4 (0.0, 0.7)                        | 0.0 (-0.4, 0.4)   | 0.3 (0.0, 0.6)    | 0.6 (0.1, 1.0)    | 0.8 (0.2, 1.3)    |
| <b>Southwestern Europe</b> |                                       |                   |                   |                   |                   |                                       |                   |                   |                   |                   |
| <b>Andorra</b>             |                                       |                   |                   |                   |                   |                                       |                   |                   |                   |                   |
| rural                      | 19.1 (17.2, 21.0)                     | 15.6 (13.4, 17.9) | 18.1 (16.2, 19.9) | 21.1 (19.1, 23.1) | 21.8 (19.1, 24.6) | 19.6 (17.7, 21.4)                     | 16.1 (13.9, 18.3) | 18.5 (16.7, 20.4) | 21.6 (19.6, 23.5) | 22.3 (19.6, 25.1) |
| urban                      | 19.0 (17.1, 21.0)                     | 15.5 (13.3, 17.7) | 18.0 (16.1, 19.8) | 21.1 (19.1, 23.1) | 21.9 (19.1, 24.7) | 19.8 (17.8, 21.6)                     | 16.2 (14.0, 18.3) | 18.7 (16.9, 20.5) | 21.8 (19.8, 23.7) | 22.6 (19.8, 25.3) |
| urban-rural difference     | 0.0 (-0.7, 0.6)                       | -0.1 (-0.9, 0.6)  | -0.1 (-0.7, 0.6)  | 0.0 (-0.7, 0.7)   | 0.1 (-0.8, 0.9)   | 0.2 (-0.4, 0.8)                       | 0.1 (-0.7, 0.8)   | 0.2 (-0.4, 0.8)   | 0.2 (-0.4, 0.9)   | 0.3 (-0.6, 1.1)   |
| <b>Cyprus</b>              |                                       |                   |                   |                   |                   |                                       |                   |                   |                   |                   |
| rural                      | 19.0 (17.6, 20.4)                     | 15.1 (13.6, 16.5) | 18.3 (16.9, 19.7) | 21.1 (19.7, 22.5) | 21.1 (19.3, 22.9) | 19.5 (18.8, 20.2)                     | 15.6 (14.8, 16.4) | 18.8 (18.1, 19.5) | 21.6 (20.8, 22.4) | 21.6 (20.1, 23.1) |
| urban                      | 18.9 (17.6, 20.3)                     | 14.9 (13.5, 16.3) | 18.2 (16.8, 19.5) | 21.1 (19.7, 22.4) | 21.2 (19.3, 23.0) | 19.7 (19.1, 20.4)                     | 15.7 (15.0, 16.4) | 19.0 (18.4, 19.6) | 21.9 (21.1, 22.6) | 22.0 (20.5, 23.5) |
| urban-rural difference     | -0.1 (-0.7, 0.5)                      | -0.2 (-0.9, 0.5)  | -0.1 (-0.7, 0.4)  | 0.0 (-0.6, 0.6)   | 0.1 (-0.7, 0.8)   | 0.2 (-0.2, 0.7)                       | 0.1 (-0.5, 0.7)   | 0.2 (-0.2, 0.6)   | 0.3 (-0.2, 0.8)   | 0.4 (-0.3, 1.0)   |
| <b>France</b>              |                                       |                   |                   |                   |                   |                                       |                   |                   |                   |                   |
| rural                      | 18.3 (17.0, 19.5)                     | 15.0 (13.7, 16.3) | 17.3 (16.0, 18.6) | 20.1 (18.8, 21.4) | 21.1 (19.7, 22.5) | 18.7 (18.0, 19.3)                     | 15.4 (14.7, 16.1) | 17.7 (17.0, 18.3) | 20.5 (19.9, 21.2) | 21.5 (20.7, 22.3) |
| urban                      | 18.4 (17.1, 19.7)                     | 14.9 (13.5, 16.2) | 17.3 (16.0, 18.6) | 20.4 (19.1, 21.7) | 21.5 (20.2, 22.9) | 19.1 (18.5, 19.7)                     | 15.5 (14.8, 16.2) | 18.0 (17.4, 18.7) | 21.1 (20.4, 21.7) | 22.2 (21.6, 22.9) |

| Girls                              | Mean BMI in 1990 (kg/m <sup>2</sup> ) |                   |                   |                   |                   | Mean BMI in 2020 (kg/m <sup>2</sup> ) |                   |                   |                   |                   |
|------------------------------------|---------------------------------------|-------------------|-------------------|-------------------|-------------------|---------------------------------------|-------------------|-------------------|-------------------|-------------------|
|                                    | Age-standardised                      | 5 years           | 10 years          | 15 years          | 19 years          | Age-standardised                      | 5 years           | 10 years          | 15 years          | 19 years          |
| urban-rural difference             | 0.1 (-0.4, 0.6)                       | -0.1 (-0.7, 0.4)  | 0.1 (-0.4, 0.6)   | 0.3 (-0.3, 0.8)   | 0.4 (-0.2, 1.1)   | 0.4 (0.0, 0.8)                        | 0.1 (-0.3, 0.6)   | 0.3 (0.0, 0.7)    | 0.5 (0.1, 1.0)    | 0.7 (0.1, 1.3)    |
| <b>Greece</b>                      |                                       |                   |                   |                   |                   |                                       |                   |                   |                   |                   |
| rural                              | 18.9 (17.9, 19.8)                     | 15.4 (14.3, 16.4) | 18.1 (17.1, 19.1) | 20.8 (19.7, 21.8) | 21.2 (20.1, 22.3) | 19.7 (19.2, 20.3)                     | 16.2 (15.6, 16.8) | 18.9 (18.4, 19.5) | 21.7 (21.1, 22.2) | 22.0 (21.3, 22.7) |
| urban                              | 18.9 (17.9, 19.9)                     | 15.3 (14.2, 16.3) | 18.1 (17.1, 19.0) | 20.8 (19.8, 21.9) | 21.3 (20.2, 22.3) | 19.9 (19.4, 20.4)                     | 16.3 (15.7, 16.9) | 19.1 (18.6, 19.6) | 21.9 (21.3, 22.4) | 22.3 (21.7, 22.9) |
| urban-rural difference             | 0.0 (-0.3, 0.4)                       | -0.1 (-0.5, 0.3)  | 0.0 (-0.3, 0.3)   | 0.1 (-0.3, 0.4)   | 0.1 (-0.4, 0.6)   | 0.2 (-0.1, 0.5)                       | 0.1 (-0.3, 0.4)   | 0.1 (-0.2, 0.4)   | 0.2 (-0.1, 0.5)   | 0.3 (-0.2, 0.7)   |
| <b>Israel</b>                      |                                       |                   |                   |                   |                   |                                       |                   |                   |                   |                   |
| rural                              | 19.1 (18.5, 19.6)                     | 15.0 (13.9, 16.0) | 17.9 (17.3, 18.6) | 21.4 (20.9, 21.8) | 22.3 (21.8, 22.8) | 19.6 (19.1, 20.2)                     | 15.5 (14.5, 16.4) | 18.5 (17.9, 19.1) | 21.9 (21.3, 22.5) | 22.8 (22.2, 23.4) |
| urban                              | 18.9 (18.4, 19.4)                     | 14.9 (14.0, 15.9) | 17.8 (17.2, 18.4) | 21.1 (20.7, 21.6) | 22.0 (21.5, 22.4) | 19.7 (19.3, 20.2)                     | 15.8 (15.0, 16.6) | 18.6 (18.1, 19.2) | 22.0 (21.4, 22.5) | 22.8 (22.2, 23.4) |
| urban-rural difference             | -0.2 (-0.6, 0.2)                      | 0.0 (-0.7, 0.7)   | -0.1 (-0.6, 0.3)  | -0.2 (-0.5, 0.1)  | -0.3 (-0.6, 0.0)  | 0.1 (-0.2, 0.5)                       | 0.3 (-0.3, 0.9)   | 0.2 (-0.2, 0.6)   | 0.1 (-0.2, 0.4)   | 0.0 (-0.4, 0.3)   |
| <b>Italy</b>                       |                                       |                   |                   |                   |                   |                                       |                   |                   |                   |                   |
| rural                              | 19.5 (18.7, 20.3)                     | 16.1 (15.1, 17.1) | 18.3 (17.5, 19.2) | 21.5 (20.7, 22.3) | 22.1 (21.2, 23.1) | 19.6 (19.0, 20.1)                     | 16.2 (15.5, 16.9) | 18.4 (17.9, 19.0) | 21.6 (21.0, 22.2) | 22.2 (21.4, 23.0) |
| urban                              | 19.3 (18.5, 20.1)                     | 16.1 (15.2, 17.1) | 18.2 (17.4, 19.0) | 21.3 (20.5, 22.1) | 21.8 (20.9, 22.7) | 19.5 (19.0, 20.0)                     | 16.3 (15.7, 17.1) | 18.4 (17.9, 19.0) | 21.5 (20.9, 22.1) | 22.0 (21.2, 22.7) |
| urban-rural difference             | -0.1 (-0.6, 0.4)                      | 0.0 (-0.5, 0.6)   | -0.1 (-0.6, 0.4)  | -0.2 (-0.8, 0.3)  | -0.3 (-1.0, 0.3)  | -0.1 (-0.4, 0.3)                      | 0.1 (-0.2, 0.5)   | 0.0 (-0.3, 0.3)   | -0.1 (-0.6, 0.3)  | -0.2 (-0.8, 0.3)  |
| <b>Malta</b>                       |                                       |                   |                   |                   |                   |                                       |                   |                   |                   |                   |
| rural                              | 19.4 (17.9, 20.8)                     | 16.0 (14.5, 17.4) | 18.1 (16.7, 19.6) | 21.3 (19.8, 22.9) | 22.7 (20.5, 24.8) | 19.8 (19.0, 20.6)                     | 16.4 (15.4, 17.3) | 18.6 (17.8, 19.3) | 21.8 (20.7, 22.8) | 23.1 (21.3, 25.0) |
| urban                              | 19.3 (17.9, 20.7)                     | 15.8 (14.4, 17.2) | 18.1 (16.6, 19.4) | 21.3 (19.8, 22.9) | 22.8 (20.6, 24.9) | 19.9 (19.2, 20.6)                     | 16.4 (15.6, 17.2) | 18.7 (18.0, 19.3) | 22.0 (21.0, 22.9) | 23.4 (21.7, 25.1) |
| urban-rural difference             | -0.1 (-0.7, 0.6)                      | -0.2 (-0.9, 0.5)  | -0.1 (-0.7, 0.5)  | 0.0 (-0.7, 0.7)   | 0.1 (-0.8, 1.0)   | 0.2 (-0.4, 0.7)                       | 0.0 (-0.6, 0.6)   | 0.1 (-0.4, 0.6)   | 0.2 (-0.4, 0.9)   | 0.3 (-0.5, 1.2)   |
| <b>Portugal</b>                    |                                       |                   |                   |                   |                   |                                       |                   |                   |                   |                   |
| rural                              | 19.1 (17.8, 20.3)                     | 15.9 (14.6, 17.2) | 18.2 (17.0, 19.5) | 21.0 (19.7, 22.3) | 21.1 (19.8, 22.5) | 19.2 (18.7, 19.8)                     | 16.0 (15.5, 16.6) | 18.4 (17.8, 18.9) | 21.1 (20.6, 21.7) | 21.3 (20.5, 22.0) |
| urban                              | 19.1 (17.8, 20.3)                     | 15.7 (14.4, 17.0) | 18.2 (16.9, 19.4) | 21.1 (19.9, 22.4) | 21.3 (20.0, 22.7) | 19.4 (18.9, 19.9)                     | 16.0 (15.5, 16.5) | 18.5 (18.0, 19.0) | 21.4 (20.8, 22.0) | 21.7 (20.9, 22.4) |
| urban-rural difference             | 0.0 (-0.4, 0.5)                       | -0.2 (-0.7, 0.4)  | 0.0 (-0.5, 0.4)   | 0.1 (-0.4, 0.6)   | 0.2 (-0.3, 0.8)   | 0.2 (-0.1, 0.5)                       | 0.0 (-0.3, 0.3)   | 0.1 (-0.2, 0.4)   | 0.3 (-0.1, 0.6)   | 0.4 (-0.1, 0.9)   |
| <b>Spain</b>                       |                                       |                   |                   |                   |                   |                                       |                   |                   |                   |                   |
| rural                              | 19.6 (18.6, 20.6)                     | 16.6 (15.6, 17.7) | 18.7 (17.7, 19.8) | 21.3 (20.3, 22.4) | 21.7 (20.7, 22.8) | 19.6 (19.1, 20.0)                     | 16.6 (16.1, 17.1) | 18.7 (18.3, 19.1) | 21.3 (20.8, 21.8) | 21.7 (21.1, 22.4) |
| urban                              | 19.4 (18.4, 20.5)                     | 16.1 (15.1, 17.2) | 18.5 (17.5, 19.5) | 21.3 (20.3, 22.3) | 21.9 (20.8, 22.9) | 19.9 (19.5, 20.3)                     | 16.6 (16.1, 17.1) | 19.0 (18.6, 19.4) | 21.8 (21.3, 22.2) | 22.3 (21.7, 22.9) |
| urban-rural difference             | -0.1 (-0.6, 0.3)                      | -0.4 (-1.0, 0.1)  | -0.2 (-0.7, 0.2)  | 0.0 (-0.5, 0.5)   | 0.2 (-0.4, 0.7)   | 0.3 (0.0, 0.6)                        | 0.0 (-0.3, 0.3)   | 0.2 (0.0, 0.5)    | 0.4 (0.1, 0.8)    | 0.6 (0.2, 1.1)    |
| <b>Latin America and Caribbean</b> |                                       |                   |                   |                   |                   |                                       |                   |                   |                   |                   |
| <i>Andean Latin America</i>        |                                       |                   |                   |                   |                   |                                       |                   |                   |                   |                   |
| <b>Bolivia</b>                     |                                       |                   |                   |                   |                   |                                       |                   |                   |                   |                   |
| rural                              | 19.4 (17.9, 20.9)                     | 15.4 (13.4, 17.5) | 17.8 (16.3, 19.4) | 21.8 (20.4, 23.3) | 23.3 (21.7, 24.8) | 20.5 (19.5, 21.5)                     | 16.5 (14.8, 18.1) | 18.9 (17.8, 20.0) | 22.9 (22.0, 23.8) | 24.3 (23.4, 25.2) |
| urban                              | 19.5 (18.0, 21.0)                     | 16.0 (14.0, 18.1) | 18.1 (16.6, 19.6) | 21.7 (20.2, 23.2) | 22.8 (21.3, 24.3) | 20.6 (19.6, 21.6)                     | 17.1 (15.4, 18.8) | 19.2 (18.1, 20.2) | 22.8 (21.9, 23.7) | 23.9 (23.0, 24.8) |
| urban-rural difference             | 0.1 (-0.5, 0.7)                       | 0.6 (-0.2, 1.4)   | 0.2 (-0.4, 0.9)   | -0.1 (-0.7, 0.4)  | -0.4 (-1.0, 0.2)  | 0.1 (-0.4, 0.7)                       | 0.7 (-0.1, 1.5)   | 0.3 (-0.3, 0.9)   | -0.1 (-0.6, 0.4)  | -0.4 (-0.9, 0.1)  |
| <b>Ecuador</b>                     |                                       |                   |                   |                   |                   |                                       |                   |                   |                   |                   |
| rural                              | 19.3 (17.8, 20.8)                     | 15.3 (13.8, 16.9) | 17.8 (16.3, 19.3) | 21.6 (20.1, 23.1) | 23.3 (21.8, 24.8) | 19.9 (19.3, 20.5)                     | 15.9 (15.3, 16.6) | 18.4 (17.8, 19.0) | 22.2 (21.6, 22.8) | 23.9 (23.2, 24.6) |
| urban                              | 19.6 (18.1, 21.1)                     | 15.9 (14.4, 17.5) | 18.2 (16.7, 19.7) | 21.7 (20.2, 23.2) | 23.2 (21.7, 24.7) | 20.2 (19.7, 20.8)                     | 16.6 (16.0, 17.3) | 18.9 (18.3, 19.4) | 22.4 (21.8, 22.9) | 23.9 (23.2, 24.5) |
| urban-rural difference             | 0.3 (-0.3, 0.9)                       | 0.6 (0.0, 1.3)    | 0.4 (-0.2, 1.0)   | 0.1 (-0.5, 0.7)   | -0.1 (-0.7, 0.6)  | 0.3 (0.0, 0.7)                        | 0.7 (0.3, 1.1)    | 0.4 (0.1, 0.8)    | 0.2 (-0.2, 0.6)   | 0.0 (-0.5, 0.4)   |
| <b>Peru</b>                        |                                       |                   |                   |                   |                   |                                       |                   |                   |                   |                   |
| rural                              | 19.4 (18.1, 20.7)                     | 15.7 (14.3, 17.1) | 17.7 (16.3, 19.0) | 21.8 (20.4, 23.2) | 23.4 (22.1, 24.8) | 20.1 (19.7, 20.4)                     | 16.3 (15.9, 16.8) | 18.3 (17.9, 18.7) | 22.5 (22.1, 22.8) | 24.1 (23.7, 24.4) |
| urban                              | 19.8 (18.4, 21.1)                     | 16.6 (15.3, 18.0) | 18.2 (16.8, 19.6) | 21.9 (20.5, 23.2) | 23.2 (21.8, 24.5) | 20.9 (20.5, 21.3)                     | 17.8 (17.3, 18.3) | 19.3 (18.9, 19.7) | 23.0 (22.7, 23.4) | 24.3 (23.9, 24.7) |
| urban-rural difference             | 0.4 (-0.1, 0.8)                       | 1.0 (0.4, 1.5)    | 0.5 (0.0, 1.0)    | 0.1 (-0.4, 0.5)   | -0.3 (-0.8, 0.2)  | 0.8 (0.6, 1.1)                        | 1.4 (1.0, 1.8)    | 1.0 (0.7, 1.3)    | 0.6 (0.3, 0.8)    | 0.2 (0.0, 0.5)    |
| <b>Caribbean</b>                   |                                       |                   |                   |                   |                   |                                       |                   |                   |                   |                   |
| <b>Antigua and Barbuda</b>         |                                       |                   |                   |                   |                   |                                       |                   |                   |                   |                   |
| rural                              | 19.3 (17.6, 21.1)                     | 15.2 (13.0, 17.4) | 17.6 (15.9, 19.4) | 21.9 (20.2, 23.6) | 23.4 (20.8, 26.0) | 21.1 (19.5, 22.8)                     | 17.0 (14.9, 19.1) | 19.4 (17.7, 21.1) | 23.7 (22.0, 25.3) | 25.2 (22.7, 27.6) |
| urban                              | 19.9 (18.1, 21.6)                     | 15.9 (13.7, 18.1) | 18.2 (16.4, 20.0) | 22.3 (20.6, 24.1) | 23.7 (21.2, 26.3) | 21.4 (19.7, 23.0)                     | 17.4 (15.2, 19.5) | 19.7 (18.1, 21.3) | 23.8 (22.2, 25.5) | 25.2 (22.7, 27.7) |
| urban-rural difference             | 0.5 (-0.2, 1.2)                       | 0.7 (-0.2, 1.5)   | 0.6 (-0.1, 1.2)   | 0.4 (-0.3, 1.2)   | 0.3 (-0.6, 1.2)   | 0.3 (-0.5, 0.9)                       | 0.4 (-0.5, 1.3)   | 0.3 (-0.4, 1.0)   | 0.2 (-0.6, 0.9)   | 0.1 (-0.8, 1.0)   |
| <b>Bahamas</b>                     |                                       |                   |                   |                   |                   |                                       |                   |                   |                   |                   |
| rural                              | 19.8 (18.1, 21.5)                     | 15.7 (13.6, 17.9) | 18.2 (16.5, 19.9) | 22.3 (20.6, 24.0) | 23.5 (21.1, 26.0) | 21.8 (20.4, 23.2)                     | 17.7 (15.7, 19.7) | 20.2 (18.8, 21.6) | 24.3 (22.9, 25.7) | 25.5 (23.2, 27.8) |
| urban                              | 20.4 (18.7, 22.0)                     | 16.4 (14.3, 18.6) | 18.8 (17.1, 20.4) | 22.8 (21.1, 24.4) | 24.0 (21.5, 26.4) | 22.1 (20.8, 23.4)                     | 18.2 (16.3, 20.2) | 20.5 (19.2, 21.9) | 24.6 (23.3, 25.8) | 25.7 (23.5, 27.9) |
| urban-rural difference             | 0.6 (-0.1, 1.2)                       | 0.7 (-0.2, 1.6)   | 0.6 (-0.1, 1.3)   | 0.5 (-0.3, 1.2)   | 0.4 (-0.5, 1.3)   | 0.3 (-0.4, 1.0)                       | 0.5 (-0.4, 1.3)   | 0.4 (-0.3, 1.1)   | 0.3 (-0.5, 1.0)   | 0.2 (-0.7, 1.1)   |
| <b>Barbados</b>                    |                                       |                   |                   |                   |                   |                                       |                   |                   |                   |                   |
| rural                              | 19.2 (17.5, 20.8)                     | 15.1 (12.9, 17.2) | 17.4 (15.8, 19.1) | 21.7 (20.1, 23.3) | 23.2 (20.8, 25.6) | 20.9 (19.5, 22.2)                     | 16.8 (14.8, 18.7) | 19.2 (17.8, 20.6) | 23.4 (22.1, 24.8) | 25.0 (22.7, 27.1) |
| urban                              | 19.7 (18.0, 21.3)                     | 15.7 (13.6, 17.9) | 18.0 (16.4, 19.7) | 22.2 (20.5, 23.8) | 23.6 (21.2, 26.0) | 21.2 (19.8, 22.6)                     | 17.2 (15.2, 19.2) | 19.5 (18.1, 20.9) | 23.6 (22.3, 25.0) | 25.1 (22.8, 27.3) |

| Girls                                   | Mean BMI in 1990 (kg/m <sup>2</sup> ) |                   |                   |                   |                   | Mean BMI in 2020 (kg/m <sup>2</sup> ) |                   |                   |                   |                   |
|-----------------------------------------|---------------------------------------|-------------------|-------------------|-------------------|-------------------|---------------------------------------|-------------------|-------------------|-------------------|-------------------|
|                                         | Age-standardised                      | 5 years           | 10 years          | 15 years          | 19 years          | Age-standardised                      | 5 years           | 10 years          | 15 years          | 19 years          |
| urban-rural difference                  | 0.5 (-0.2, 1.2)                       | 0.7 (-0.2, 1.5)   | 0.6 (-0.1, 1.3)   | 0.4 (-0.3, 1.2)   | 0.4 (-0.6, 1.3)   | 0.3 (-0.4, 0.9)                       | 0.4 (-0.5, 1.3)   | 0.3 (-0.4, 1.0)   | 0.2 (-0.5, 0.9)   | 0.1 (-0.8, 1.0)   |
| <b>Belize</b>                           |                                       |                   |                   |                   |                   |                                       |                   |                   |                   |                   |
| rural                                   | 19.2 (17.5, 20.9)                     | 15.1 (13.0, 17.3) | 17.6 (15.8, 19.2) | 21.7 (20.0, 23.5) | 23.1 (20.5, 25.8) | 21.0 (19.5, 22.5)                     | 16.9 (14.9, 19.0) | 19.4 (17.8, 20.9) | 23.5 (22.0, 25.0) | 24.9 (22.5, 27.4) |
| urban                                   | 19.7 (18.0, 21.4)                     | 15.8 (13.6, 18.0) | 18.1 (16.4, 19.8) | 22.2 (20.5, 23.9) | 23.5 (20.9, 26.2) | 21.3 (19.7, 22.8)                     | 17.3 (15.3, 19.4) | 19.7 (18.2, 21.2) | 23.8 (22.2, 25.3) | 25.1 (22.6, 27.5) |
| urban-rural difference                  | 0.5 (-0.2, 1.2)                       | 0.7 (-0.2, 1.5)   | 0.6 (-0.1, 1.3)   | 0.5 (-0.3, 1.2)   | 0.4 (-0.6, 1.3)   | 0.3 (-0.4, 0.9)                       | 0.4 (-0.5, 1.3)   | 0.3 (-0.4, 1.0)   | 0.2 (-0.6, 0.9)   | 0.1 (-0.8, 1.0)   |
| <b>Bermuda</b>                          |                                       |                   |                   |                   |                   |                                       |                   |                   |                   |                   |
| rural                                   | 18.5 (16.5, 20.5)                     | 14.5 (12.1, 16.9) | 16.9 (14.9, 18.9) | 21.0 (18.9, 23.1) | 22.3 (19.4, 25.2) | 20.2 (18.2, 22.2)                     | 16.2 (13.8, 18.6) | 18.6 (16.6, 20.5) | 22.7 (20.7, 24.7) | 24.0 (21.1, 26.8) |
| urban                                   | 19.1 (17.0, 21.0)                     | 15.2 (12.8, 17.6) | 17.5 (15.5, 19.4) | 21.5 (19.4, 23.5) | 22.7 (19.8, 25.6) | 20.5 (18.5, 22.5)                     | 16.6 (14.2, 19.0) | 18.9 (16.9, 20.8) | 22.9 (20.9, 24.9) | 24.2 (21.2, 27.0) |
| urban-rural difference                  | 0.5 (-0.2, 1.2)                       | 0.7 (-0.2, 1.5)   | 0.6 (-0.1, 1.3)   | 0.5 (-0.3, 1.2)   | 0.4 (-0.5, 1.4)   | 0.3 (-0.4, 1.0)                       | 0.4 (-0.5, 1.3)   | 0.3 (-0.4, 1.0)   | 0.2 (-0.5, 1.0)   | 0.1 (-0.8, 1.1)   |
| <b>Cuba</b>                             |                                       |                   |                   |                   |                   |                                       |                   |                   |                   |                   |
| rural                                   | 17.4 (16.0, 18.7)                     | 13.4 (11.4, 15.4) | 15.5 (14.0, 16.9) | 19.9 (18.7, 21.2) | 21.6 (20.3, 23.0) | 18.7 (17.3, 20.1)                     | 14.7 (12.7, 16.7) | 16.8 (15.3, 18.3) | 21.3 (19.9, 22.6) | 23.0 (21.5, 24.4) |
| urban                                   | 17.8 (16.6, 19.0)                     | 14.0 (12.1, 15.9) | 15.9 (14.6, 17.2) | 20.3 (19.2, 21.4) | 21.9 (20.9, 23.1) | 18.8 (17.4, 20.2)                     | 15.0 (13.0, 17.0) | 16.9 (15.5, 18.4) | 21.3 (20.0, 22.6) | 22.9 (21.6, 24.2) |
| urban-rural difference                  | 0.4 (-0.2, 1.1)                       | 0.6 (-0.3, 1.4)   | 0.5 (-0.2, 1.2)   | 0.4 (-0.3, 1.1)   | 0.3 (-0.5, 1.1)   | 0.1 (-0.6, 0.7)                       | 0.2 (-0.6, 1.1)   | 0.1 (-0.5, 0.8)   | 0.0 (-0.6, 0.7)   | 0.0 (-0.8, 0.8)   |
| <b>Dominica</b>                         |                                       |                   |                   |                   |                   |                                       |                   |                   |                   |                   |
| rural                                   | 19.0 (17.4, 20.6)                     | 14.9 (12.8, 17.0) | 17.3 (15.7, 18.9) | 21.5 (20.0, 23.1) | 23.0 (21.0, 25.1) | 20.7 (19.2, 22.2)                     | 16.6 (14.6, 18.6) | 19.0 (17.5, 20.6) | 23.2 (21.8, 24.7) | 24.7 (22.8, 26.7) |
| urban                                   | 19.5 (18.0, 21.1)                     | 15.6 (13.5, 17.7) | 17.9 (16.3, 19.5) | 22.0 (20.5, 23.5) | 23.4 (21.4, 25.4) | 21.0 (19.6, 22.4)                     | 17.1 (15.0, 19.0) | 19.3 (17.9, 20.9) | 23.5 (22.1, 24.9) | 24.9 (23.0, 26.8) |
| urban-rural difference                  | 0.5 (-0.1, 1.2)                       | 0.7 (-0.2, 1.6)   | 0.6 (-0.1, 1.3)   | 0.5 (-0.3, 1.2)   | 0.4 (-0.5, 1.3)   | 0.3 (-0.4, 1.0)                       | 0.4 (-0.5, 1.3)   | 0.3 (-0.4, 1.0)   | 0.2 (-0.5, 1.0)   | 0.1 (-0.8, 1.1)   |
| <b>Dominican Republic</b>               |                                       |                   |                   |                   |                   |                                       |                   |                   |                   |                   |
| rural                                   | 18.0 (16.8, 19.2)                     | 14.0 (12.1, 15.9) | 16.3 (15.0, 17.7) | 20.5 (19.4, 21.6) | 21.8 (20.7, 23.0) | 20.7 (19.6, 21.8)                     | 16.7 (14.8, 18.5) | 19.1 (17.8, 20.3) | 23.2 (22.2, 24.3) | 24.6 (23.6, 25.6) |
| urban                                   | 18.5 (17.3, 19.7)                     | 14.7 (12.9, 16.7) | 16.9 (15.6, 18.2) | 20.9 (19.7, 22.0) | 22.1 (20.9, 23.2) | 20.9 (19.7, 22.0)                     | 17.1 (15.2, 18.9) | 19.3 (18.0, 20.6) | 23.3 (22.2, 24.4) | 24.5 (23.4, 25.6) |
| urban-rural difference                  | 0.5 (0.0, 1.0)                        | 0.7 (-0.1, 1.6)   | 0.6 (0.0, 1.2)    | 0.4 (-0.1, 0.9)   | 0.2 (-0.4, 0.9)   | 0.2 (-0.4, 0.7)                       | 0.4 (-0.4, 1.2)   | 0.2 (-0.4, 0.8)   | 0.1 (-0.5, 0.6)   | -0.1 (-0.7, 0.5)  |
| <b>Grenada</b>                          |                                       |                   |                   |                   |                   |                                       |                   |                   |                   |                   |
| rural                                   | 18.5 (16.5, 20.6)                     | 14.5 (12.1, 16.9) | 16.9 (15.0, 18.9) | 21.0 (19.0, 23.1) | 22.4 (19.5, 25.2) | 20.2 (18.2, 22.2)                     | 16.2 (13.8, 18.5) | 18.6 (16.6, 20.5) | 22.7 (20.7, 24.7) | 24.0 (21.2, 26.9) |
| urban                                   | 19.1 (17.1, 21.1)                     | 15.2 (12.8, 17.6) | 17.5 (15.5, 19.4) | 21.5 (19.5, 23.6) | 22.7 (19.9, 25.6) | 20.5 (18.5, 22.4)                     | 16.6 (14.2, 18.9) | 18.9 (16.9, 20.8) | 22.9 (20.9, 24.9) | 24.2 (21.4, 26.9) |
| urban-rural difference                  | 0.5 (-0.1, 1.2)                       | 0.7 (-0.2, 1.5)   | 0.6 (-0.1, 1.3)   | 0.5 (-0.3, 1.2)   | 0.4 (-0.5, 1.3)   | 0.3 (-0.4, 1.0)                       | 0.4 (-0.5, 1.3)   | 0.3 (-0.4, 1.0)   | 0.2 (-0.5, 0.9)   | 0.1 (-0.8, 1.0)   |
| <b>Guyana</b>                           |                                       |                   |                   |                   |                   |                                       |                   |                   |                   |                   |
| rural                                   | 17.9 (16.4, 19.5)                     | 14.0 (12.0, 16.0) | 16.3 (14.7, 18.0) | 20.4 (18.9, 21.9) | 21.8 (20.2, 23.4) | 19.8 (18.6, 21.1)                     | 15.9 (14.0, 17.8) | 18.2 (16.9, 19.6) | 22.3 (21.2, 23.5) | 23.7 (22.4, 24.9) |
| urban                                   | 18.5 (17.0, 20.1)                     | 14.7 (12.6, 16.8) | 16.9 (15.3, 18.6) | 20.9 (19.4, 22.5) | 22.3 (20.6, 23.9) | 20.2 (18.9, 21.4)                     | 16.4 (14.5, 18.3) | 18.6 (17.3, 20.0) | 22.6 (21.4, 23.8) | 23.9 (22.7, 25.3) |
| urban-rural difference                  | 0.6 (-0.1, 1.3)                       | 0.7 (-0.2, 1.5)   | 0.6 (-0.1, 1.3)   | 0.5 (-0.1, 1.3)   | 0.5 (-0.3, 1.3)   | 0.4 (-0.2, 1.0)                       | 0.5 (-0.4, 1.3)   | 0.4 (-0.3, 1.0)   | 0.3 (-0.3, 0.9)   | 0.3 (-0.5, 1.0)   |
| <b>Haiti</b>                            |                                       |                   |                   |                   |                   |                                       |                   |                   |                   |                   |
| rural                                   | 16.9 (15.5, 18.3)                     | 13.1 (11.1, 15.1) | 15.3 (13.8, 16.8) | 19.3 (17.9, 20.6) | 20.8 (19.4, 22.2) | 18.0 (17.1, 18.9)                     | 14.1 (12.4, 15.8) | 16.4 (15.3, 17.4) | 20.3 (19.6, 21.1) | 21.9 (21.1, 22.7) |
| urban                                   | 17.7 (16.3, 19.2)                     | 13.9 (11.9, 16.0) | 16.1 (14.6, 17.6) | 20.0 (18.7, 21.4) | 21.5 (20.1, 23.0) | 18.3 (17.4, 19.2)                     | 14.6 (12.9, 16.3) | 16.7 (15.7, 17.8) | 20.7 (19.9, 21.4) | 22.2 (21.3, 22.9) |
| urban-rural difference                  | 0.8 (0.3, 1.4)                        | 0.9 (0.1, 1.7)    | 0.8 (0.2, 1.5)    | 0.7 (0.3, 1.3)    | 0.7 (0.1, 1.3)    | 0.3 (-0.1, 0.8)                       | 0.4 (-0.4, 1.2)   | 0.4 (-0.2, 0.9)   | 0.3 (-0.1, 0.7)   | 0.3 (-0.2, 0.7)   |
| <b>Jamaica</b>                          |                                       |                   |                   |                   |                   |                                       |                   |                   |                   |                   |
| rural                                   | 18.3 (16.8, 19.7)                     | 14.0 (12.1, 15.9) | 16.7 (15.2, 18.2) | 20.9 (19.5, 22.3) | 22.0 (20.5, 23.6) | 19.7 (18.6, 20.8)                     | 15.5 (13.7, 17.1) | 18.1 (16.9, 19.3) | 22.3 (21.3, 23.4) | 23.5 (22.3, 24.7) |
| urban                                   | 19.0 (17.6, 20.4)                     | 14.9 (13.0, 16.8) | 17.4 (16.0, 18.9) | 21.6 (20.2, 23.0) | 22.7 (21.1, 24.2) | 20.1 (19.0, 21.2)                     | 15.9 (14.2, 17.6) | 18.5 (17.3, 19.6) | 22.7 (21.6, 23.8) | 23.8 (22.5, 25.0) |
| urban-rural difference                  | 0.7 (0.2, 1.4)                        | 0.8 (0.0, 1.7)    | 0.8 (0.1, 1.4)    | 0.7 (0.1, 1.3)    | 0.7 (-0.1, 1.4)   | 0.4 (-0.2, 1.0)                       | 0.5 (-0.4, 1.3)   | 0.4 (-0.2, 1.1)   | 0.4 (-0.3, 0.9)   | 0.3 (-0.4, 1.0)   |
| <b>Puerto Rico</b>                      |                                       |                   |                   |                   |                   |                                       |                   |                   |                   |                   |
| rural                                   | 18.6 (16.9, 20.3)                     | 14.6 (12.3, 16.7) | 17.0 (15.3, 18.8) | 21.1 (19.4, 22.9) | 22.1 (19.8, 24.3) | 20.2 (18.7, 21.8)                     | 16.2 (14.2, 18.3) | 18.7 (17.1, 20.3) | 22.8 (21.3, 24.3) | 23.7 (21.7, 25.8) |
| urban                                   | 19.1 (17.4, 20.8)                     | 15.2 (13.0, 17.4) | 17.6 (15.9, 19.3) | 21.5 (19.9, 23.2) | 22.4 (20.2, 24.6) | 20.5 (19.0, 22.0)                     | 16.7 (14.6, 18.7) | 19.0 (17.4, 20.6) | 23.0 (21.5, 24.4) | 23.9 (21.9, 25.8) |
| urban-rural difference                  | 0.5 (-0.2, 1.2)                       | 0.7 (-0.2, 1.5)   | 0.6 (-0.1, 1.3)   | 0.5 (-0.3, 1.2)   | 0.4 (-0.5, 1.3)   | 0.3 (-0.4, 1.0)                       | 0.4 (-0.5, 1.2)   | 0.3 (-0.4, 1.0)   | 0.2 (-0.5, 0.9)   | 0.1 (-0.7, 1.0)   |
| <b>Saint Kitts and Nevis</b>            |                                       |                   |                   |                   |                   |                                       |                   |                   |                   |                   |
| rural                                   | 19.2 (17.6, 20.8)                     | 15.1 (13.0, 17.3) | 17.6 (15.9, 19.2) | 21.7 (20.1, 23.3) | 23.0 (20.7, 25.3) | 21.0 (19.6, 22.3)                     | 16.9 (15.0, 18.9) | 19.3 (18.0, 20.7) | 23.5 (22.2, 24.8) | 24.8 (22.6, 27.0) |
| urban                                   | 19.7 (18.1, 21.3)                     | 15.8 (13.7, 17.9) | 18.1 (16.5, 19.8) | 22.2 (20.6, 23.7) | 23.4 (21.0, 25.8) | 21.2 (19.8, 22.6)                     | 17.3 (15.4, 19.4) | 19.6 (18.2, 21.1) | 23.7 (22.3, 25.0) | 24.9 (22.7, 27.2) |
| urban-rural difference                  | 0.5 (-0.1, 1.2)                       | 0.7 (-0.2, 1.5)   | 0.6 (-0.1, 1.2)   | 0.4 (-0.3, 1.2)   | 0.4 (-0.6, 1.3)   | 0.3 (-0.4, 0.9)                       | 0.4 (-0.5, 1.3)   | 0.3 (-0.4, 1.0)   | 0.2 (-0.6, 0.9)   | 0.1 (-0.8, 1.0)   |
| <b>Saint Lucia</b>                      |                                       |                   |                   |                   |                   |                                       |                   |                   |                   |                   |
| rural                                   | 18.6 (16.5, 20.5)                     | 14.6 (12.1, 16.9) | 16.9 (14.9, 18.9) | 21.1 (19.0, 23.1) | 22.4 (19.5, 25.3) | 20.2 (18.2, 22.2)                     | 16.2 (13.8, 18.5) | 18.6 (16.6, 20.5) | 22.7 (20.7, 24.7) | 24.0 (21.2, 26.9) |
| urban                                   | 19.1 (17.1, 21.1)                     | 15.2 (12.8, 17.6) | 17.5 (15.5, 19.4) | 21.5 (19.5, 23.6) | 22.7 (19.9, 25.7) | 20.5 (18.5, 22.4)                     | 16.6 (14.2, 18.9) | 18.9 (17.0, 20.8) | 22.9 (20.9, 24.9) | 24.1 (21.3, 27.0) |
| urban-rural difference                  | 0.5 (-0.1, 1.2)                       | 0.7 (-0.2, 1.5)   | 0.6 (-0.1, 1.3)   | 0.5 (-0.3, 1.2)   | 0.4 (-0.5, 1.3)   | 0.3 (-0.4, 0.9)                       | 0.4 (-0.5, 1.3)   | 0.3 (-0.4, 1.0)   | 0.2 (-0.5, 0.9)   | 0.1 (-0.8, 1.0)   |
| <b>Saint Vincent and the Grenadines</b> |                                       |                   |                   |                   |                   |                                       |                   |                   |                   |                   |
| rural                                   | 19.0 (17.5, 20.6)                     | 15.0 (12.8, 17.1) | 17.3 (15.7, 18.9) | 21.6 (20.0, 23.1) | 23.2 (21.0, 25.3) | 20.8 (19.9, 21.8)                     | 16.8 (15.0, 18.5) | 19.1 (18.0, 20.2) | 23.4 (22.5, 24.2) | 25.0 (23.3, 26.6) |

| Girls                  | Mean BMI in 1990 (kg/m <sup>2</sup> ) |                   |                   |                   |                   | Mean BMI in 2020 (kg/m <sup>2</sup> ) |                   |                   |                   |                   |
|------------------------|---------------------------------------|-------------------|-------------------|-------------------|-------------------|---------------------------------------|-------------------|-------------------|-------------------|-------------------|
|                        | Age-standardised                      | 5 years           | 10 years          | 15 years          | 19 years          | Age-standardised                      | 5 years           | 10 years          | 15 years          | 19 years          |
| urban                  | 19.5 (17.9, 21.1)                     | 15.6 (13.5, 17.7) | 17.9 (16.2, 19.5) | 22.0 (20.4, 23.5) | 23.5 (21.4, 25.6) | 21.1 (20.1, 22.1)                     | 17.2 (15.5, 18.9) | 19.4 (18.3, 20.5) | 23.6 (22.7, 24.4) | 25.1 (23.5, 26.7) |
| urban-rural difference | 0.5 (-0.2, 1.2)                       | 0.7 (-0.2, 1.5)   | 0.6 (-0.1, 1.3)   | 0.5 (-0.3, 1.2)   | 0.4 (-0.5, 1.3)   | 0.3 (-0.4, 1.0)                       | 0.4 (-0.5, 1.3)   | 0.3 (-0.4, 1.0)   | 0.2 (-0.5, 0.9)   | 0.1 (-0.8, 1.0)   |
| Suriname               |                                       |                   |                   |                   |                   |                                       |                   |                   |                   |                   |
| rural                  | 18.2 (16.3, 20.1)                     | 14.2 (11.9, 16.5) | 16.7 (14.8, 18.6) | 20.7 (18.8, 22.5) | 21.4 (19.1, 23.8) | 19.8 (18.1, 21.5)                     | 15.8 (13.7, 18.0) | 18.3 (16.6, 20.1) | 22.3 (20.6, 24.0) | 23.0 (20.9, 25.2) |
| urban                  | 18.7 (16.8, 20.5)                     | 14.9 (12.6, 17.2) | 17.2 (15.3, 19.1) | 21.1 (19.3, 23.0) | 21.8 (19.5, 24.1) | 20.0 (18.3, 21.7)                     | 16.2 (14.1, 18.4) | 18.6 (16.8, 20.3) | 22.5 (20.7, 24.1) | 23.1 (21.0, 25.3) |
| urban-rural difference | 0.5 (-0.2, 1.2)                       | 0.7 (-0.2, 1.6)   | 0.6 (-0.1, 1.3)   | 0.4 (-0.3, 1.2)   | 0.4 (-0.6, 1.3)   | 0.3 (-0.4, 0.9)                       | 0.4 (-0.5, 1.3)   | 0.3 (-0.4, 1.0)   | 0.2 (-0.6, 0.9)   | 0.1 (-0.8, 1.0)   |
| Trinidad and Tobago    |                                       |                   |                   |                   |                   |                                       |                   |                   |                   |                   |
| rural                  | 17.8 (16.4, 19.0)                     | 14.0 (12.7, 15.2) | 16.3 (15.0, 17.6) | 20.2 (18.8, 21.6) | 21.1 (19.2, 23.1) | 19.6 (18.3, 21.0)                     | 15.8 (14.4, 17.2) | 18.1 (16.8, 19.5) | 22.0 (20.7, 23.4) | 23.0 (21.2, 24.8) |
| urban                  | 18.3 (17.0, 19.6)                     | 14.5 (13.2, 15.7) | 16.8 (15.5, 18.1) | 20.7 (19.4, 22.1) | 21.6 (19.7, 23.6) | 19.9 (18.6, 21.3)                     | 16.1 (14.7, 17.6) | 18.4 (17.1, 19.8) | 22.3 (21.0, 23.7) | 23.3 (21.4, 25.1) |
| urban-rural difference | 0.5 (0.0, 1.1)                        | 0.5 (0.0, 1.0)    | 0.5 (0.0, 1.0)    | 0.5 (-0.1, 1.1)   | 0.5 (-0.3, 1.3)   | 0.3 (-0.3, 0.9)                       | 0.3 (-0.4, 1.0)   | 0.3 (-0.3, 0.9)   | 0.3 (-0.4, 1.0)   | 0.3 (-0.5, 1.1)   |
| Central Latin America  |                                       |                   |                   |                   |                   |                                       |                   |                   |                   |                   |
| Colombia               |                                       |                   |                   |                   |                   |                                       |                   |                   |                   |                   |
| rural                  | 17.8 (16.4, 19.2)                     | 14.2 (12.8, 15.6) | 16.1 (14.7, 17.5) | 20.2 (18.9, 21.6) | 21.7 (20.3, 23.1) | 19.7 (18.9, 20.5)                     | 16.1 (15.3, 16.9) | 18.0 (17.2, 18.8) | 22.1 (21.3, 22.9) | 23.6 (22.7, 24.4) |
| urban                  | 18.1 (16.8, 19.5)                     | 14.9 (13.5, 16.3) | 16.5 (15.1, 17.9) | 20.4 (19.0, 21.7) | 21.6 (20.2, 23.0) | 19.8 (19.0, 20.5)                     | 16.6 (15.8, 17.4) | 18.2 (17.4, 18.9) | 22.0 (21.3, 22.8) | 23.3 (22.4, 24.0) |
| urban-rural difference | 0.3 (-0.1, 0.8)                       | 0.7 (0.2, 1.2)    | 0.4 (0.0, 0.9)    | 0.1 (-0.3, 0.7)   | -0.1 (-0.6, 0.5)  | 0.1 (-0.3, 0.4)                       | 0.5 (0.1, 0.9)    | 0.2 (-0.2, 0.6)   | -0.1 (-0.4, 0.3)  | -0.3 (-0.7, 0.1)  |
| Costa Rica             |                                       |                   |                   |                   |                   |                                       |                   |                   |                   |                   |
| rural                  | 18.3 (16.8, 19.9)                     | 14.5 (12.6, 16.5) | 16.9 (15.3, 18.5) | 20.8 (19.2, 22.4) | 21.7 (19.6, 23.7) | 20.0 (18.7, 21.2)                     | 16.2 (14.4, 17.9) | 18.5 (17.1, 19.8) | 22.4 (21.1, 23.6) | 23.3 (21.5, 25.0) |
| urban                  | 18.8 (17.2, 20.3)                     | 15.2 (13.2, 17.2) | 17.4 (15.8, 19.0) | 21.1 (19.6, 22.7) | 21.9 (19.9, 23.9) | 20.3 (19.0, 21.4)                     | 16.7 (14.9, 18.4) | 18.9 (17.5, 20.1) | 22.6 (21.4, 23.7) | 23.4 (21.8, 25.0) |
| urban-rural difference | 0.4 (-0.2, 1.1)                       | 0.6 (-0.2, 1.4)   | 0.5 (-0.2, 1.1)   | 0.3 (-0.4, 1.1)   | 0.2 (-0.6, 1.1)   | 0.3 (-0.3, 0.9)                       | 0.5 (-0.3, 1.3)   | 0.4 (-0.3, 1.0)   | 0.2 (-0.4, 0.9)   | 0.1 (-0.7, 1.0)   |
| El Salvador            |                                       |                   |                   |                   |                   |                                       |                   |                   |                   |                   |
| rural                  | 18.5 (17.0, 19.9)                     | 14.7 (12.7, 16.7) | 16.8 (15.3, 18.4) | 20.9 (19.4, 22.3) | 22.5 (21.0, 24.0) | 20.1 (18.9, 21.3)                     | 16.3 (14.5, 18.0) | 18.4 (17.3, 19.7) | 22.5 (21.4, 23.6) | 24.1 (22.8, 25.5) |
| urban                  | 19.0 (17.6, 20.5)                     | 15.3 (13.3, 17.3) | 17.4 (15.9, 18.9) | 21.4 (19.9, 22.8) | 23.0 (21.4, 24.5) | 20.5 (19.4, 21.7)                     | 16.8 (15.0, 18.5) | 18.9 (17.7, 20.1) | 22.9 (21.8, 24.0) | 24.5 (23.2, 25.8) |
| urban-rural difference | 0.5 (0.0, 1.1)                        | 0.6 (-0.2, 1.4)   | 0.6 (0.0, 1.2)    | 0.5 (-0.1, 1.1)   | 0.5 (-0.2, 1.2)   | 0.4 (-0.1, 1.0)                       | 0.5 (-0.3, 1.3)   | 0.4 (-0.1, 1.0)   | 0.4 (-0.1, 0.9)   | 0.4 (-0.3, 1.0)   |
| Guatemala              |                                       |                   |                   |                   |                   |                                       |                   |                   |                   |                   |
| rural                  | 18.4 (17.0, 19.8)                     | 14.4 (12.9, 15.9) | 16.7 (15.3, 18.2) | 20.9 (19.5, 22.3) | 22.3 (20.9, 23.7) | 19.6 (19.2, 20.1)                     | 15.6 (15.0, 16.3) | 18.0 (17.5, 18.5) | 22.1 (21.7, 22.5) | 23.5 (23.0, 24.0) |
| urban                  | 18.9 (17.5, 20.3)                     | 15.0 (13.5, 16.5) | 17.3 (15.9, 18.7) | 21.3 (20.0, 22.8) | 22.7 (21.3, 24.1) | 19.9 (19.5, 20.4)                     | 16.1 (15.4, 16.7) | 18.3 (17.8, 18.8) | 22.4 (21.9, 22.8) | 23.7 (23.2, 24.3) |
| urban-rural difference | 0.5 (0.0, 1.1)                        | 0.6 (-0.1, 1.4)   | 0.5 (0.0, 1.1)    | 0.5 (-0.1, 1.0)   | 0.4 (-0.2, 1.0)   | 0.3 (-0.1, 0.7)                       | 0.4 (-0.3, 1.1)   | 0.4 (-0.1, 0.8)   | 0.3 (-0.1, 0.6)   | 0.2 (-0.2, 0.6)   |
| Honduras               |                                       |                   |                   |                   |                   |                                       |                   |                   |                   |                   |
| rural                  | 18.1 (16.6, 19.6)                     | 14.3 (12.3, 16.3) | 16.5 (15.0, 18.1) | 20.5 (19.0, 22.0) | 22.0 (20.4, 23.5) | 19.6 (18.4, 20.8)                     | 15.8 (14.1, 17.6) | 18.0 (16.8, 19.3) | 22.0 (20.9, 23.2) | 23.5 (22.3, 24.7) |
| urban                  | 18.6 (17.2, 20.1)                     | 14.9 (13.0, 16.9) | 17.1 (15.5, 18.6) | 21.0 (19.6, 22.5) | 22.4 (20.9, 23.9) | 20.0 (18.8, 21.2)                     | 16.3 (14.5, 18.1) | 18.5 (17.2, 19.7) | 22.4 (21.3, 23.5) | 23.8 (22.6, 25.0) |
| urban-rural difference | 0.5 (-0.1, 1.1)                       | 0.6 (-0.2, 1.4)   | 0.5 (-0.1, 1.1)   | 0.5 (-0.1, 1.0)   | 0.4 (-0.2, 1.0)   | 0.4 (-0.1, 0.9)                       | 0.5 (-0.3, 1.3)   | 0.4 (-0.1, 1.0)   | 0.4 (-0.1, 0.8)   | 0.3 (-0.2, 0.8)   |
| Mexico                 |                                       |                   |                   |                   |                   |                                       |                   |                   |                   |                   |
| rural                  | 17.5 (16.9, 18.0)                     | 13.2 (12.7, 13.8) | 16.0 (15.4, 16.5) | 20.1 (19.5, 20.6) | 21.3 (20.7, 21.9) | 20.2 (19.7, 20.7)                     | 16.0 (15.5, 16.5) | 18.7 (18.2, 19.2) | 22.8 (22.3, 23.3) | 24.0 (23.5, 24.6) |
| urban                  | 18.1 (17.5, 18.6)                     | 13.9 (13.3, 14.5) | 16.6 (16.0, 17.1) | 20.6 (20.1, 21.1) | 21.8 (21.2, 22.3) | 20.8 (20.2, 21.3)                     | 16.6 (16.1, 17.1) | 19.3 (18.7, 19.8) | 23.3 (22.8, 23.8) | 24.5 (23.9, 25.0) |
| urban-rural difference | 0.6 (0.3, 0.9)                        | 0.7 (0.3, 1.0)    | 0.6 (0.3, 0.9)    | 0.5 (0.3, 0.8)    | 0.5 (0.2, 0.8)    | 0.5 (0.3, 0.8)                        | 0.6 (0.3, 0.9)    | 0.5 (0.3, 0.8)    | 0.5 (0.2, 0.8)    | 0.5 (0.1, 0.8)    |
| Nicaragua              |                                       |                   |                   |                   |                   |                                       |                   |                   |                   |                   |
| rural                  | 18.7 (17.4, 19.9)                     | 14.8 (13.0, 16.5) | 17.1 (15.8, 18.4) | 21.1 (19.9, 22.3) | 22.3 (21.1, 23.5) | 20.1 (18.9, 21.3)                     | 16.2 (14.5, 18.0) | 18.6 (17.3, 19.8) | 22.6 (21.5, 23.7) | 23.8 (22.6, 24.9) |
| urban                  | 19.0 (17.8, 20.3)                     | 15.3 (13.6, 17.1) | 17.5 (16.2, 18.9) | 21.3 (20.1, 22.6) | 22.4 (21.2, 23.6) | 20.4 (19.2, 21.6)                     | 16.8 (15.0, 18.6) | 19.0 (17.7, 20.2) | 22.8 (21.7, 23.9) | 23.8 (22.7, 25.0) |
| urban-rural difference | 0.3 (-0.2, 0.8)                       | 0.6 (-0.2, 1.3)   | 0.4 (-0.2, 0.9)   | 0.2 (-0.2, 0.7)   | 0.1 (-0.4, 0.6)   | 0.3 (-0.2, 0.8)                       | 0.5 (-0.2, 1.3)   | 0.4 (-0.2, 0.9)   | 0.2 (-0.2, 0.7)   | 0.1 (-0.4, 0.6)   |
| Panama                 |                                       |                   |                   |                   |                   |                                       |                   |                   |                   |                   |
| rural                  | 18.8 (17.4, 20.2)                     | 15.0 (13.5, 16.4) | 17.1 (15.7, 18.5) | 21.3 (19.9, 22.7) | 22.9 (21.5, 24.4) | 21.0 (20.4, 21.6)                     | 17.1 (16.4, 17.9) | 19.3 (18.6, 19.9) | 23.4 (22.8, 24.1) | 25.1 (24.3, 25.9) |
| urban                  | 19.1 (17.8, 20.5)                     | 15.5 (14.0, 16.9) | 17.5 (16.1, 18.9) | 21.5 (20.1, 22.9) | 23.1 (21.6, 24.6) | 21.1 (20.5, 21.7)                     | 17.4 (16.6, 18.2) | 19.4 (18.8, 20.1) | 23.5 (22.9, 24.1) | 25.0 (24.2, 25.8) |
| urban-rural difference | 0.3 (-0.2, 0.8)                       | 0.5 (-0.1, 1.1)   | 0.4 (-0.1, 0.9)   | 0.2 (-0.3, 0.8)   | 0.1 (-0.5, 0.8)   | 0.1 (-0.4, 0.6)                       | 0.3 (-0.3, 0.9)   | 0.2 (-0.4, 0.6)   | 0.0 (-0.5, 0.5)   | -0.1 (-0.6, 0.5)  |
| Venezuela              |                                       |                   |                   |                   |                   |                                       |                   |                   |                   |                   |
| rural                  | 17.8 (16.2, 19.4)                     | 14.0 (12.1, 16.0) | 16.1 (14.5, 17.7) | 20.2 (18.6, 21.8) | 22.2 (20.3, 24.2) | 19.3 (18.0, 20.5)                     | 15.5 (13.7, 17.1) | 17.5 (16.2, 18.8) | 21.6 (20.4, 22.9) | 23.7 (22.0, 25.3) |
| urban                  | 18.2 (16.7, 19.8)                     | 14.6 (12.7, 16.5) | 16.5 (14.9, 18.1) | 20.5 (18.9, 22.0) | 22.4 (20.5, 24.3) | 19.5 (18.4, 20.6)                     | 15.9 (14.3, 17.5) | 17.8 (16.7, 19.0) | 21.8 (20.7, 22.9) | 23.7 (22.3, 25.2) |
| urban-rural difference | 0.4 (-0.3, 1.1)                       | 0.6 (-0.2, 1.4)   | 0.5 (-0.2, 1.1)   | 0.3 (-0.4, 1.0)   | 0.2 (-0.7, 1.1)   | 0.3 (-0.4, 0.9)                       | 0.4 (-0.3, 1.2)   | 0.3 (-0.3, 0.9)   | 0.2 (-0.5, 0.9)   | 0.1 (-0.8, 0.9)   |
| Southern Latin America |                                       |                   |                   |                   |                   |                                       |                   |                   |                   |                   |
| Argentina              |                                       |                   |                   |                   |                   |                                       |                   |                   |                   |                   |
| rural                  | 18.7 (17.3, 20.2)                     | 15.1 (13.6, 16.6) | 17.6 (16.2, 19.0) | 20.9 (19.5, 22.4) | 21.4 (19.8, 23.0) | 20.1 (19.3, 20.9)                     | 16.5 (15.6, 17.5) | 19.0 (18.2, 19.8) | 22.3 (21.5, 23.1) | 22.8 (21.8, 23.8) |
| urban                  | 19.1 (17.7, 20.4)                     | 15.4 (14.0, 16.8) | 17.9 (16.5, 19.3) | 21.3 (19.9, 22.7) | 21.9 (20.5, 23.3) | 20.4 (19.8, 21.0)                     | 16.7 (16.0, 17.5) | 19.3 (18.7, 19.9) | 22.7 (22.1, 23.3) | 23.2 (22.5, 23.9) |

| Girls                           | Mean BMI in 1990 (kg/m <sup>2</sup> ) |                   |                   |                   |                   | Mean BMI in 2020 (kg/m <sup>2</sup> ) |                   |                   |                   |                   |
|---------------------------------|---------------------------------------|-------------------|-------------------|-------------------|-------------------|---------------------------------------|-------------------|-------------------|-------------------|-------------------|
|                                 | Age-standardised                      | 5 years           | 10 years          | 15 years          | 19 years          | Age-standardised                      | 5 years           | 10 years          | 15 years          | 19 years          |
| urban-rural difference          | 0.4 (-0.3, 1.0)                       | 0.3 (-0.5, 1.0)   | 0.3 (-0.3, 1.0)   | 0.4 (-0.3, 1.1)   | 0.5 (-0.3, 1.3)   | 0.3 (-0.3, 0.9)                       | 0.2 (-0.5, 1.0)   | 0.3 (-0.3, 0.9)   | 0.4 (-0.3, 1.0)   | 0.4 (-0.3, 1.2)   |
| <b>Brazil</b>                   |                                       |                   |                   |                   |                   |                                       |                   |                   |                   |                   |
| rural                           | 18.4 (17.9, 18.9)                     | 15.1 (14.6, 15.6) | 17.0 (16.5, 17.5) | 20.5 (20.0, 21.0) | 22.0 (21.5, 22.5) | 20.0 (19.7, 20.4)                     | 16.7 (16.3, 17.1) | 18.6 (18.3, 19.0) | 22.1 (21.8, 22.5) | 23.6 (23.2, 24.1) |
| urban                           | 18.7 (18.2, 19.1)                     | 15.8 (15.3, 16.3) | 17.4 (16.9, 17.9) | 20.6 (20.1, 21.1) | 21.8 (21.3, 22.4) | 20.2 (19.9, 20.5)                     | 17.3 (16.9, 17.7) | 18.9 (18.6, 19.2) | 22.1 (21.8, 22.4) | 23.4 (23.0, 23.7) |
| urban-rural difference          | 0.3 (0.0, 0.5)                        | 0.7 (0.4, 1.0)    | 0.4 (0.1, 0.7)    | 0.1 (-0.2, 0.4)   | -0.2 (-0.5, 0.2)  | 0.1 (-0.1, 0.4)                       | 0.6 (0.3, 0.8)    | 0.3 (0.0, 0.5)    | 0.0 (-0.3, 0.2)   | -0.3 (-0.5, 0.0)  |
| <b>Chile</b>                    |                                       |                   |                   |                   |                   |                                       |                   |                   |                   |                   |
| rural                           | 19.9 (18.6, 21.2)                     | 15.5 (14.0, 16.9) | 18.5 (17.2, 19.9) | 22.3 (21.0, 23.6) | 24.4 (22.9, 25.8) | 21.2 (20.3, 22.1)                     | 16.8 (15.7, 17.9) | 19.8 (18.8, 20.8) | 23.6 (22.7, 24.5) | 25.7 (24.6, 26.8) |
| urban                           | 20.2 (19.0, 21.5)                     | 16.3 (14.8, 17.7) | 18.9 (17.6, 20.3) | 22.4 (21.1, 23.6) | 24.2 (22.9, 25.5) | 21.6 (20.8, 22.5)                     | 17.7 (16.6, 18.7) | 20.4 (19.4, 21.2) | 23.8 (22.9, 24.6) | 25.6 (24.6, 26.6) |
| urban-rural difference          | 0.3 (-0.4, 0.9)                       | 0.8 (0.0, 1.5)    | 0.4 (-0.2, 1.0)   | 0.1 (-0.6, 0.7)   | -0.2 (-1.0, 0.6)  | 0.4 (-0.1, 0.9)                       | 0.9 (0.2, 1.6)    | 0.5 (0.0, 1.1)    | 0.2 (-0.3, 0.7)   | -0.1 (-0.8, 0.6)  |
| <b>Paraguay</b>                 |                                       |                   |                   |                   |                   |                                       |                   |                   |                   |                   |
| rural                           | 18.7 (17.2, 20.2)                     | 15.2 (13.3, 17.2) | 17.5 (15.9, 19.0) | 20.9 (19.4, 22.3) | 21.7 (19.9, 23.6) | 20.0 (19.1, 20.9)                     | 16.5 (15.0, 18.1) | 18.8 (17.8, 19.7) | 22.2 (21.4, 23.0) | 23.0 (21.7, 24.4) |
| urban                           | 19.0 (17.5, 20.5)                     | 15.8 (13.9, 17.8) | 17.8 (16.3, 19.4) | 21.0 (19.5, 22.5) | 21.7 (20.0, 23.4) | 20.2 (19.4, 21.1)                     | 17.1 (15.6, 18.6) | 19.1 (18.2, 20.0) | 22.2 (21.4, 23.0) | 22.9 (21.6, 24.2) |
| urban-rural difference          | 0.3 (-0.4, 0.9)                       | 0.6 (-0.2, 1.4)   | 0.4 (-0.3, 1.0)   | 0.1 (-0.6, 0.8)   | -0.1 (-0.9, 0.7)  | 0.2 (-0.3, 0.7)                       | 0.6 (-0.2, 1.3)   | 0.3 (-0.2, 0.8)   | 0.1 (-0.5, 0.6)   | -0.1 (-0.8, 0.5)  |
| <b>Uruguay</b>                  |                                       |                   |                   |                   |                   |                                       |                   |                   |                   |                   |
| rural                           | 19.0 (17.6, 20.4)                     | 15.8 (14.2, 17.3) | 17.5 (16.1, 19.0) | 21.1 (19.6, 22.6) | 22.5 (20.7, 24.4) | 20.6 (19.7, 21.4)                     | 17.3 (16.1, 18.5) | 19.1 (18.1, 20.0) | 22.7 (21.8, 23.6) | 24.1 (22.7, 25.5) |
| urban                           | 19.3 (17.9, 20.7)                     | 16.4 (15.0, 17.9) | 17.9 (16.6, 19.4) | 21.3 (19.9, 22.8) | 22.5 (20.8, 24.3) | 20.9 (20.2, 21.5)                     | 17.9 (17.0, 18.9) | 19.5 (18.7, 20.2) | 22.9 (22.3, 23.5) | 24.1 (22.9, 25.2) |
| urban-rural difference          | 0.3 (-0.3, 1.0)                       | 0.6 (-0.2, 1.4)   | 0.4 (-0.2, 1.1)   | 0.2 (-0.5, 0.9)   | 0.0 (-0.9, 0.9)   | 0.3 (-0.3, 1.0)                       | 0.6 (-0.2, 1.4)   | 0.4 (-0.3, 1.1)   | 0.2 (-0.5, 0.9)   | 0.0 (-0.8, 0.9)   |
| <b>Oceania</b>                  |                                       |                   |                   |                   |                   |                                       |                   |                   |                   |                   |
| <b>Melanesia</b>                |                                       |                   |                   |                   |                   |                                       |                   |                   |                   |                   |
| <b>Fiji</b>                     |                                       |                   |                   |                   |                   |                                       |                   |                   |                   |                   |
| rural                           | 18.8 (17.2, 20.3)                     | 14.8 (12.4, 17.1) | 16.4 (14.8, 18.1) | 21.3 (19.8, 22.8) | 24.5 (22.9, 26.2) | 19.9 (18.9, 21.0)                     | 16.0 (13.9, 18.0) | 17.6 (16.5, 18.8) | 22.5 (21.5, 23.5) | 25.7 (24.5, 26.9) |
| urban                           | 18.7 (17.1, 20.3)                     | 15.2 (12.8, 17.5) | 16.5 (14.9, 18.2) | 21.1 (19.6, 22.7) | 24.1 (22.4, 25.7) | 20.0 (19.0, 21.1)                     | 16.4 (14.4, 18.4) | 17.8 (16.7, 18.9) | 22.4 (21.5, 23.4) | 25.4 (24.2, 26.5) |
| urban-rural difference          | 0.0 (-0.8, 0.7)                       | 0.4 (-0.6, 1.4)   | 0.1 (-0.7, 0.9)   | -0.2 (-1.0, 0.5)  | -0.4 (-1.3, 0.4)  | 0.1 (-0.7, 0.8)                       | 0.5 (-0.5, 1.5)   | 0.2 (-0.6, 1.0)   | -0.1 (-0.9, 0.7)  | -0.4 (-1.3, 0.6)  |
| <b>Papua New Guinea</b>         |                                       |                   |                   |                   |                   |                                       |                   |                   |                   |                   |
| rural                           | 19.8 (18.0, 21.6)                     | 15.7 (13.3, 18.1) | 17.6 (15.7, 19.6) | 22.7 (20.9, 24.4) | 24.4 (22.5, 26.3) | 21.0 (19.4, 22.6)                     | 16.9 (14.6, 19.2) | 18.8 (17.1, 20.6) | 23.9 (22.3, 25.4) | 25.6 (23.9, 27.3) |
| urban                           | 19.9 (18.1, 21.9)                     | 16.1 (13.6, 18.6) | 17.8 (15.9, 19.8) | 22.7 (20.9, 24.6) | 24.2 (22.2, 26.4) | 21.2 (19.5, 22.9)                     | 17.4 (15.0, 19.7) | 19.1 (17.3, 20.9) | 23.9 (22.3, 25.6) | 25.5 (23.7, 27.4) |
| urban-rural difference          | 0.1 (-0.7, 1.0)                       | 0.4 (-0.6, 1.5)   | 0.2 (-0.6, 1.1)   | 0.0 (-0.9, 0.9)   | -0.1 (-1.3, 1.0)  | 0.2 (-0.6, 1.0)                       | 0.5 (-0.5, 1.5)   | 0.3 (-0.5, 1.1)   | 0.1 (-0.8, 1.0)   | -0.1 (-1.2, 1.0)  |
| <b>Solomon Islands</b>          |                                       |                   |                   |                   |                   |                                       |                   |                   |                   |                   |
| rural                           | 19.3 (17.6, 20.9)                     | 14.8 (13.0, 16.6) | 16.8 (15.1, 18.5) | 22.5 (20.8, 24.2) | 24.2 (22.4, 25.9) | 20.3 (19.0, 21.7)                     | 15.9 (14.5, 17.3) | 17.8 (16.5, 19.2) | 23.6 (22.3, 24.9) | 25.2 (23.9, 26.6) |
| urban                           | 19.5 (17.8, 21.2)                     | 15.3 (13.6, 17.1) | 17.1 (15.4, 18.8) | 22.5 (20.8, 24.3) | 24.0 (22.2, 25.8) | 20.6 (19.3, 21.9)                     | 16.5 (15.0, 17.9) | 18.2 (16.8, 19.6) | 23.7 (22.2, 25.1) | 25.1 (23.6, 26.7) |
| urban-rural difference          | 0.2 (-0.6, 1.0)                       | 0.5 (-0.4, 1.4)   | 0.3 (-0.5, 1.1)   | 0.0 (-0.9, 0.9)   | -0.2 (-1.2, 0.8)  | 0.3 (-0.4, 1.0)                       | 0.6 (-0.2, 1.5)   | 0.4 (-0.3, 1.1)   | 0.1 (-0.7, 0.9)   | -0.1 (-1.1, 0.9)  |
| <b>Vanuatu</b>                  |                                       |                   |                   |                   |                   |                                       |                   |                   |                   |                   |
| rural                           | 19.5 (17.6, 21.3)                     | 15.5 (12.9, 18.0) | 17.5 (15.5, 19.4) | 22.3 (20.5, 24.1) | 23.7 (21.6, 25.8) | 20.7 (18.9, 22.4)                     | 16.7 (14.3, 19.1) | 18.6 (16.8, 20.5) | 23.5 (21.8, 25.1) | 24.9 (22.9, 26.9) |
| urban                           | 19.7 (17.8, 21.6)                     | 15.9 (13.3, 18.4) | 17.7 (15.7, 19.7) | 22.3 (20.5, 24.2) | 23.6 (21.4, 25.8) | 20.9 (19.1, 22.7)                     | 17.1 (14.8, 19.6) | 18.9 (17.1, 20.8) | 23.6 (21.8, 25.3) | 24.8 (22.7, 26.9) |
| urban-rural difference          | 0.2 (-0.7, 1.0)                       | 0.4 (-0.6, 1.5)   | 0.2 (-0.6, 1.1)   | 0.1 (-0.9, 0.9)   | -0.1 (-1.2, 1.0)  | 0.2 (-0.6, 1.0)                       | 0.5 (-0.5, 1.5)   | 0.3 (-0.5, 1.1)   | 0.1 (-0.8, 1.0)   | 0.0 (-1.1, 1.0)   |
| <b>Polynesia and Micronesia</b> |                                       |                   |                   |                   |                   |                                       |                   |                   |                   |                   |
| <b>American Samoa</b>           |                                       |                   |                   |                   |                   |                                       |                   |                   |                   |                   |
| rural                           | 21.0 (18.7, 23.3)                     | 17.2 (14.2, 20.2) | 18.9 (16.7, 21.1) | 23.5 (21.3, 25.8) | 25.9 (22.9, 28.8) | 22.5 (20.4, 24.5)                     | 18.7 (16.0, 21.5) | 20.4 (18.3, 22.4) | 25.0 (22.9, 27.1) | 27.3 (24.5, 30.2) |
| urban                           | 21.2 (19.0, 23.5)                     | 17.6 (14.6, 20.6) | 19.2 (16.9, 21.4) | 23.7 (21.4, 26.0) | 26.0 (23.0, 29.0) | 22.7 (20.6, 24.7)                     | 19.1 (16.3, 21.9) | 20.7 (18.6, 22.6) | 25.2 (23.1, 27.3) | 27.5 (24.6, 30.3) |
| urban-rural difference          | 0.2 (-0.6, 1.1)                       | 0.4 (-0.7, 1.5)   | 0.3 (-0.6, 1.1)   | 0.2 (-0.7, 1.1)   | 0.1 (-1.0, 1.2)   | 0.2 (-0.6, 1.1)                       | 0.4 (-0.7, 1.4)   | 0.3 (-0.6, 1.1)   | 0.2 (-0.7, 1.1)   | 0.1 (-1.0, 1.3)   |
| <b>Cook Islands</b>             |                                       |                   |                   |                   |                   |                                       |                   |                   |                   |                   |
| rural                           | 22.0 (20.2, 23.8)                     | 18.1 (15.3, 20.9) | 19.7 (17.9, 21.5) | 24.6 (22.8, 26.3) | 27.3 (25.0, 29.5) | 23.7 (22.5, 25.0)                     | 19.9 (17.6, 22.3) | 21.5 (20.1, 22.9) | 26.4 (25.2, 27.6) | 29.1 (27.4, 30.9) |
| urban                           | 22.2 (20.3, 23.9)                     | 18.4 (15.6, 21.2) | 20.0 (18.1, 21.8) | 24.8 (23.0, 26.5) | 27.5 (25.2, 29.5) | 24.0 (22.9, 25.2)                     | 20.2 (17.9, 22.6) | 21.8 (20.5, 23.1) | 26.6 (25.6, 27.7) | 29.3 (27.7, 30.8) |
| urban-rural difference          | 0.3 (-0.6, 1.1)                       | 0.3 (-0.8, 1.4)   | 0.3 (-0.6, 1.1)   | 0.2 (-0.7, 1.1)   | 0.2 (-1.0, 1.3)   | 0.3 (-0.5, 1.1)                       | 0.4 (-0.7, 1.4)   | 0.3 (-0.5, 1.1)   | 0.2 (-0.6, 1.1)   | 0.2 (-0.9, 1.3)   |
| <b>French Polynesia</b>         |                                       |                   |                   |                   |                   |                                       |                   |                   |                   |                   |
| rural                           | 21.0 (19.1, 22.7)                     | 17.4 (14.7, 20.1) | 19.1 (17.2, 20.9) | 23.4 (21.6, 25.1) | 25.2 (23.1, 27.3) | 22.4 (21.2, 23.6)                     | 18.8 (16.5, 21.2) | 20.5 (19.2, 21.8) | 24.8 (23.7, 26.0) | 26.7 (25.0, 28.3) |
| urban                           | 21.2 (19.4, 22.9)                     | 17.8 (15.0, 20.5) | 19.4 (17.5, 21.2) | 23.6 (21.8, 25.2) | 25.3 (23.3, 27.4) | 22.6 (21.5, 23.8)                     | 19.2 (16.9, 21.6) | 20.8 (19.6, 22.0) | 25.0 (24.0, 26.1) | 26.8 (25.2, 28.4) |
| urban-rural difference          | 0.2 (-0.6, 1.1)                       | 0.4 (-0.7, 1.4)   | 0.3 (-0.6, 1.1)   | 0.2 (-0.7, 1.1)   | 0.1 (-1.0, 1.2)   | 0.3 (-0.6, 1.1)                       | 0.4 (-0.7, 1.4)   | 0.3 (-0.6, 1.1)   | 0.2 (-0.7, 1.1)   | 0.1 (-1.0, 1.2)   |
| <b>Kiribati</b>                 |                                       |                   |                   |                   |                   |                                       |                   |                   |                   |                   |
| rural                           | 20.6 (18.7, 22.4)                     | 16.9 (14.1, 19.6) | 18.6 (16.8, 20.5) | 23.1 (21.4, 24.9) | 24.8 (22.9, 26.6) | 21.7 (20.3, 23.1)                     | 18.0 (15.5, 20.5) | 19.8 (18.3, 21.3) | 24.2 (22.9, 25.6) | 26.0 (24.5, 27.4) |
| urban                           | 20.8 (19.0, 22.6)                     | 17.2 (14.4, 20.1) | 18.9 (17.1, 20.8) | 23.3 (21.5, 25.0) | 24.9 (23.0, 26.8) | 21.9 (20.6, 23.3)                     | 18.4 (15.9, 20.9) | 20.1 (18.6, 21.5) | 24.4 (23.1, 25.8) | 26.1 (24.7, 27.5) |

| Girls                                   | Mean BMI in 1990 (kg/m <sup>2</sup> ) |                   |                   |                   |                   | Mean BMI in 2020 (kg/m <sup>2</sup> ) |                   |                   |                   |                   |
|-----------------------------------------|---------------------------------------|-------------------|-------------------|-------------------|-------------------|---------------------------------------|-------------------|-------------------|-------------------|-------------------|
|                                         | Age-standardised                      | 5 years           | 10 years          | 15 years          | 19 years          | Age-standardised                      | 5 years           | 10 years          | 15 years          | 19 years          |
| urban-rural difference                  | 0.2 (-0.6, 1.1)                       | 0.4 (-0.7, 1.4)   | 0.3 (-0.6, 1.1)   | 0.2 (-0.7, 1.1)   | 0.1 (-1.0, 1.2)   | 0.2 (-0.6, 1.1)                       | 0.4 (-0.7, 1.4)   | 0.3 (-0.6, 1.1)   | 0.2 (-0.7, 1.1)   | 0.1 (-1.0, 1.2)   |
| <b>Marshall Islands</b>                 |                                       |                   |                   |                   |                   |                                       |                   |                   |                   |                   |
| rural                                   | 19.6 (17.8, 21.4)                     | 16.1 (13.2, 18.8) | 17.8 (15.9, 19.7) | 22.1 (20.4, 23.7) | 23.7 (21.8, 25.5) | 21.1 (19.6, 22.5)                     | 17.5 (15.0, 20.1) | 19.3 (17.6, 20.9) | 23.5 (22.1, 24.9) | 25.1 (23.7, 26.5) |
| urban                                   | 19.8 (18.0, 21.6)                     | 16.4 (13.6, 19.2) | 18.1 (16.1, 19.9) | 22.2 (20.5, 23.8) | 23.7 (21.9, 25.4) | 21.3 (19.9, 22.7)                     | 17.9 (15.3, 20.5) | 19.5 (17.9, 21.1) | 23.7 (22.3, 25.0) | 25.2 (23.9, 26.4) |
| urban-rural difference                  | 0.2 (-0.6, 1.1)                       | 0.4 (-0.7, 1.4)   | 0.2 (-0.6, 1.1)   | 0.1 (-0.8, 1.1)   | 0.1 (-1.0, 1.2)   | 0.2 (-0.6, 1.0)                       | 0.4 (-0.7, 1.4)   | 0.3 (-0.6, 1.1)   | 0.2 (-0.7, 1.0)   | 0.1 (-1.0, 1.1)   |
| <b>Micronesia (Federated States of)</b> |                                       |                   |                   |                   |                   |                                       |                   |                   |                   |                   |
| rural                                   | 20.0 (18.2, 21.9)                     | 16.5 (13.7, 19.3) | 18.1 (16.1, 20.1) | 22.4 (20.7, 24.2) | 24.7 (22.7, 26.5) | 21.3 (19.8, 22.8)                     | 17.8 (15.1, 20.4) | 19.4 (17.7, 21.1) | 23.7 (22.3, 25.2) | 25.9 (24.5, 27.3) |
| urban                                   | 20.4 (18.6, 22.3)                     | 16.8 (14.0, 19.8) | 18.5 (16.5, 20.5) | 22.9 (21.1, 24.6) | 25.1 (23.2, 27.0) | 21.8 (20.2, 23.3)                     | 18.2 (15.5, 20.8) | 19.8 (18.0, 21.5) | 24.2 (22.7, 25.7) | 26.4 (24.9, 27.9) |
| urban-rural difference                  | 0.4 (-0.4, 1.2)                       | 0.4 (-0.7, 1.5)   | 0.4 (-0.4, 1.3)   | 0.4 (-0.4, 1.3)   | 0.4 (-0.6, 1.4)   | 0.4 (-0.3, 1.3)                       | 0.4 (-0.6, 1.5)   | 0.4 (-0.4, 1.3)   | 0.5 (-0.3, 1.3)   | 0.5 (-0.5, 1.5)   |
| <b>Nauru</b>                            |                                       |                   |                   |                   |                   |                                       |                   |                   |                   |                   |
| rural                                   | 21.4 (19.5, 23.2)                     | 17.5 (14.8, 20.3) | 19.1 (17.2, 20.9) | 24.0 (22.2, 25.7) | 27.0 (24.8, 29.1) | 22.8 (21.4, 24.4)                     | 19.0 (16.4, 21.6) | 20.5 (19.0, 22.1) | 25.4 (24.0, 26.9) | 28.4 (26.5, 30.4) |
| urban                                   | 21.7 (19.8, 23.4)                     | 17.9 (15.1, 20.6) | 19.4 (17.4, 21.2) | 24.2 (22.5, 25.8) | 27.2 (25.2, 29.1) | 23.1 (21.7, 24.5)                     | 19.3 (16.8, 21.9) | 20.8 (19.3, 22.3) | 25.7 (24.4, 26.9) | 28.6 (26.9, 30.4) |
| urban-rural difference                  | 0.3 (-0.6, 1.1)                       | 0.3 (-0.7, 1.4)   | 0.3 (-0.6, 1.1)   | 0.2 (-0.7, 1.1)   | 0.2 (-0.9, 1.3)   | 0.3 (-0.6, 1.1)                       | 0.3 (-0.7, 1.3)   | 0.3 (-0.6, 1.1)   | 0.2 (-0.6, 1.1)   | 0.2 (-0.9, 1.2)   |
| <b>Niue</b>                             |                                       |                   |                   |                   |                   |                                       |                   |                   |                   |                   |
| rural                                   | 22.4 (20.6, 24.2)                     | 18.6 (15.8, 21.3) | 20.3 (18.3, 22.1) | 25.0 (23.2, 26.8) | 27.6 (25.3, 29.9) | 24.7 (23.5, 25.9)                     | 20.8 (18.4, 23.2) | 22.5 (21.2, 23.8) | 27.3 (26.2, 28.4) | 29.8 (28.0, 31.7) |
| urban                                   | 22.7 (20.7, 24.5)                     | 18.9 (16.1, 21.7) | 20.6 (18.6, 22.4) | 25.2 (23.3, 27.0) | 27.7 (25.4, 30.0) | 24.9 (23.7, 26.1)                     | 21.1 (18.7, 23.6) | 22.8 (21.5, 24.1) | 27.4 (26.3, 28.6) | 29.9 (28.1, 31.8) |
| urban-rural difference                  | 0.2 (-0.6, 1.1)                       | 0.4 (-0.7, 1.5)   | 0.3 (-0.6, 1.1)   | 0.2 (-0.7, 1.1)   | 0.1 (-1.0, 1.2)   | 0.2 (-0.6, 1.1)                       | 0.4 (-0.7, 1.4)   | 0.3 (-0.6, 1.1)   | 0.2 (-0.7, 1.0)   | 0.1 (-1.0, 1.2)   |
| <b>Palau</b>                            |                                       |                   |                   |                   |                   |                                       |                   |                   |                   |                   |
| rural                                   | 20.0 (18.1, 22.0)                     | 16.4 (13.5, 19.3) | 18.1 (16.1, 20.2) | 22.5 (20.5, 24.4) | 24.4 (22.0, 26.7) | 21.3 (19.6, 22.9)                     | 17.6 (15.0, 20.3) | 19.4 (17.6, 21.2) | 23.7 (22.1, 25.3) | 25.6 (23.7, 27.6) |
| urban                                   | 20.3 (18.3, 22.2)                     | 16.8 (13.8, 19.7) | 18.4 (16.3, 20.5) | 22.6 (20.7, 24.6) | 24.5 (22.2, 26.8) | 21.5 (19.9, 23.0)                     | 18.0 (15.4, 20.7) | 19.6 (17.9, 21.4) | 23.9 (22.3, 25.4) | 25.7 (23.8, 27.5) |
| urban-rural difference                  | 0.2 (-0.6, 1.1)                       | 0.4 (-0.7, 1.5)   | 0.3 (-0.6, 1.1)   | 0.1 (-0.7, 1.0)   | 0.1 (-1.0, 1.2)   | 0.2 (-0.6, 1.0)                       | 0.4 (-0.7, 1.4)   | 0.2 (-0.6, 1.1)   | 0.1 (-0.7, 1.0)   | 0.1 (-1.0, 1.1)   |
| <b>Samoa</b>                            |                                       |                   |                   |                   |                   |                                       |                   |                   |                   |                   |
| rural                                   | 21.4 (19.4, 23.4)                     | 17.6 (14.7, 20.5) | 19.2 (17.1, 21.3) | 24.0 (22.0, 25.9) | 26.8 (24.5, 29.0) | 23.0 (21.3, 24.8)                     | 19.2 (16.4, 22.0) | 20.8 (19.0, 22.6) | 25.6 (23.9, 27.3) | 28.4 (26.4, 30.4) |
| urban                                   | 21.7 (19.6, 23.7)                     | 18.0 (15.1, 20.8) | 19.5 (17.4, 21.6) | 24.2 (22.2, 26.1) | 26.9 (24.6, 29.2) | 23.2 (21.4, 25.1)                     | 19.5 (16.8, 22.4) | 21.1 (19.2, 23.0) | 25.7 (24.0, 27.5) | 28.5 (26.4, 30.6) |
| urban-rural difference                  | 0.2 (-0.7, 1.1)                       | 0.4 (-0.7, 1.4)   | 0.3 (-0.6, 1.1)   | 0.2 (-0.8, 1.1)   | 0.1 (-1.0, 1.2)   | 0.2 (-0.6, 1.1)                       | 0.4 (-0.7, 1.4)   | 0.3 (-0.6, 1.1)   | 0.2 (-0.7, 1.1)   | 0.1 (-1.0, 1.2)   |
| <b>Tokelau</b>                          |                                       |                   |                   |                   |                   |                                       |                   |                   |                   |                   |
| rural                                   | 21.8 (19.8, 23.6)                     | 17.9 (15.1, 20.7) | 19.6 (17.5, 21.5) | 24.3 (22.5, 26.1) | 26.9 (25.0, 28.9) | 23.3 (21.7, 24.8)                     | 19.4 (16.7, 22.0) | 21.1 (19.3, 22.8) | 25.8 (24.4, 27.3) | 28.4 (26.9, 30.0) |
| urban                                   | 22.0 (20.0, 23.8)                     | 18.2 (15.4, 21.0) | 19.8 (17.8, 21.8) | 24.5 (22.6, 26.3) | 27.0 (24.8, 29.1) | 23.5 (21.8, 25.1)                     | 19.8 (17.1, 22.4) | 21.3 (19.6, 23.1) | 26.0 (24.4, 27.6) | 28.5 (26.7, 30.2) |
| urban-rural difference                  | 0.2 (-0.6, 1.0)                       | 0.3 (-0.7, 1.4)   | 0.2 (-0.6, 1.1)   | 0.1 (-0.8, 1.0)   | 0.0 (-1.1, 1.1)   | 0.2 (-0.6, 1.0)                       | 0.4 (-0.7, 1.4)   | 0.2 (-0.6, 1.0)   | 0.1 (-0.7, 1.0)   | 0.0 (-1.0, 1.1)   |
| <b>Tonga</b>                            |                                       |                   |                   |                   |                   |                                       |                   |                   |                   |                   |
| rural                                   | 22.1 (20.3, 23.7)                     | 18.2 (15.5, 20.8) | 19.8 (18.0, 21.5) | 24.6 (22.9, 26.3) | 27.6 (25.9, 29.3) | 24.0 (23.1, 25.0)                     | 20.1 (17.9, 22.3) | 21.8 (20.8, 22.7) | 26.6 (25.8, 27.4) | 29.6 (28.6, 30.6) |
| urban                                   | 22.3 (20.5, 24.0)                     | 18.5 (15.8, 21.2) | 20.0 (18.2, 21.7) | 24.8 (23.0, 26.5) | 27.7 (25.8, 29.6) | 24.2 (23.2, 25.3)                     | 20.5 (18.2, 22.7) | 22.0 (20.9, 23.1) | 26.7 (25.8, 27.8) | 29.7 (28.4, 31.0) |
| urban-rural difference                  | 0.2 (-0.6, 1.1)                       | 0.3 (-0.7, 1.4)   | 0.3 (-0.6, 1.1)   | 0.2 (-0.7, 1.1)   | 0.1 (-1.0, 1.2)   | 0.2 (-0.6, 1.0)                       | 0.3 (-0.7, 1.4)   | 0.2 (-0.6, 1.1)   | 0.1 (-0.7, 1.0)   | 0.1 (-1.0, 1.1)   |
| <b>Tuvalu</b>                           |                                       |                   |                   |                   |                   |                                       |                   |                   |                   |                   |
| rural                                   | 21.4 (19.5, 23.2)                     | 17.6 (14.8, 20.4) | 19.2 (17.3, 21.1) | 23.9 (22.0, 25.7) | 26.3 (23.8, 28.7) | 22.9 (21.5, 24.3)                     | 19.1 (16.6, 21.6) | 20.8 (19.3, 22.3) | 25.4 (24.1, 26.7) | 27.8 (25.8, 29.8) |
| urban                                   | 21.6 (19.8, 23.4)                     | 17.9 (15.2, 20.7) | 19.5 (17.6, 21.4) | 24.1 (22.3, 25.8) | 26.4 (24.0, 28.8) | 23.1 (21.7, 24.5)                     | 19.5 (17.0, 22.0) | 21.1 (19.6, 22.5) | 25.6 (24.3, 26.9) | 27.9 (26.0, 29.9) |
| urban-rural difference                  | 0.2 (-0.6, 1.1)                       | 0.4 (-0.7, 1.4)   | 0.3 (-0.6, 1.1)   | 0.2 (-0.7, 1.1)   | 0.1 (-1.0, 1.2)   | 0.3 (-0.6, 1.1)                       | 0.4 (-0.7, 1.4)   | 0.3 (-0.6, 1.1)   | 0.2 (-0.7, 1.1)   | 0.1 (-0.9, 1.3)   |
| <b>South Asia</b>                       |                                       |                   |                   |                   |                   |                                       |                   |                   |                   |                   |
| <b>Afghanistan</b>                      |                                       |                   |                   |                   |                   |                                       |                   |                   |                   |                   |
| rural                                   | 17.2 (15.7, 18.6)                     | 14.3 (12.4, 16.1) | 15.4 (14.0, 16.9) | 19.3 (17.9, 20.8) | 21.1 (19.6, 22.6) | 18.9 (18.0, 19.8)                     | 16.0 (14.6, 17.4) | 17.1 (16.2, 18.1) | 21.0 (20.2, 21.9) | 22.8 (21.9, 23.7) |
| urban                                   | 17.6 (16.2, 19.1)                     | 14.6 (12.7, 16.5) | 15.8 (14.4, 17.3) | 19.8 (18.3, 21.2) | 21.6 (20.1, 23.2) | 19.2 (18.4, 20.1)                     | 16.2 (14.8, 17.7) | 17.4 (16.5, 18.4) | 21.4 (20.6, 22.3) | 23.3 (22.4, 24.2) |
| urban-rural difference                  | 0.4 (-0.2, 1.0)                       | 0.3 (-0.5, 1.1)   | 0.4 (-0.2, 1.0)   | 0.5 (-0.2, 1.1)   | 0.5 (-0.2, 1.3)   | 0.3 (-0.1, 0.8)                       | 0.2 (-0.5, 0.9)   | 0.3 (-0.2, 0.8)   | 0.4 (-0.1, 0.9)   | 0.5 (-0.1, 1.1)   |
| <b>Bangladesh</b>                       |                                       |                   |                   |                   |                   |                                       |                   |                   |                   |                   |
| rural                                   | 16.4 (15.0, 17.9)                     | 13.2 (11.4, 15.1) | 14.9 (13.5, 16.4) | 18.7 (17.2, 20.2) | 19.7 (18.3, 21.2) | 17.4 (16.9, 18.0)                     | 14.2 (12.9, 15.5) | 15.9 (15.3, 16.5) | 19.7 (19.1, 20.2) | 20.7 (20.1, 21.3) |
| urban                                   | 16.9 (15.5, 18.4)                     | 13.8 (12.0, 15.6) | 15.4 (14.0, 16.9) | 19.1 (17.7, 20.6) | 20.1 (18.6, 21.6) | 17.9 (17.4, 18.6)                     | 14.8 (13.4, 16.1) | 16.5 (15.8, 17.1) | 20.1 (19.6, 20.7) | 21.1 (20.4, 21.8) |
| urban-rural difference                  | 0.5 (-0.2, 1.1)                       | 0.6 (-0.2, 1.4)   | 0.5 (-0.2, 1.2)   | 0.4 (-0.2, 1.1)   | 0.4 (-0.4, 1.1)   | 0.5 (0.1, 0.9)                        | 0.6 (-0.1, 1.3)   | 0.5 (0.1, 1.0)    | 0.5 (0.1, 0.9)    | 0.4 (-0.1, 1.0)   |
| <b>Bhutan</b>                           |                                       |                   |                   |                   |                   |                                       |                   |                   |                   |                   |
| rural                                   | 17.4 (15.9, 19.0)                     | 14.4 (12.4, 16.5) | 15.8 (14.2, 17.5) | 19.6 (18.1, 21.1) | 20.8 (19.1, 22.4) | 18.8 (17.8, 19.8)                     | 15.8 (14.1, 17.6) | 17.2 (16.0, 18.5) | 21.0 (20.1, 21.9) | 22.2 (21.2, 23.2) |
| urban                                   | 17.9 (16.3, 19.4)                     | 14.8 (12.8, 16.9) | 16.2 (14.6, 17.9) | 20.0 (18.5, 21.5) | 21.3 (19.6, 22.9) | 19.2 (18.3, 20.2)                     | 16.2 (14.5, 17.9) | 17.6 (16.4, 18.8) | 21.4 (20.5, 22.3) | 22.6 (21.6, 23.6) |
| urban-rural difference                  | 0.4 (-0.2, 1.1)                       | 0.4 (-0.4, 1.2)   | 0.4 (-0.2, 1.1)   | 0.4 (-0.3, 1.1)   | 0.4 (-0.4, 1.3)   | 0.4 (-0.2, 1.0)                       | 0.4 (-0.4, 1.2)   | 0.4 (-0.2, 1.0)   | 0.4 (-0.2, 1.0)   | 0.4 (-0.3, 1.2)   |
| <b>India</b>                            |                                       |                   |                   |                   |                   |                                       |                   |                   |                   |                   |



| Girls                           | Mean BMI in 1990 (kg/m <sup>2</sup> ) |                   |                   |                   |                   | Mean BMI in 2020 (kg/m <sup>2</sup> ) |                   |                   |                   |                   |
|---------------------------------|---------------------------------------|-------------------|-------------------|-------------------|-------------------|---------------------------------------|-------------------|-------------------|-------------------|-------------------|
|                                 | Age-standardised                      | 5 years           | 10 years          | 15 years          | 19 years          | Age-standardised                      | 5 years           | 10 years          | 15 years          | 19 years          |
| rural                           | 15.6 (15.1, 16.1)                     | 13.1 (12.6, 13.6) | 14.2 (13.7, 14.7) | 17.5 (17.0, 18.0) | 18.7 (18.2, 19.2) | 17.0 (16.5, 17.4)                     | 14.5 (14.0, 14.9) | 15.5 (15.1, 16.0) | 18.9 (18.4, 19.3) | 20.1 (19.6, 20.5) |
| urban                           | 16.2 (15.6, 16.9)                     | 13.5 (12.9, 14.2) | 14.7 (14.1, 15.4) | 18.1 (17.5, 18.8) | 19.5 (18.8, 20.1) | 17.4 (17.0, 17.8)                     | 14.7 (14.2, 15.1) | 15.9 (15.5, 16.3) | 19.3 (18.9, 19.7) | 20.6 (20.2, 21.1) |
| urban-rural difference          | 0.6 (0.2, 1.0)                        | 0.4 (0.0, 0.9)    | 0.6 (0.2, 1.0)    | 0.7 (0.3, 1.1)    | 0.7 (0.3, 1.2)    | 0.4 (0.1, 0.6)                        | 0.2 (0.0, 0.5)    | 0.4 (0.1, 0.6)    | 0.5 (0.2, 0.7)    | 0.6 (0.3, 0.8)    |
| <b>Nepal</b>                    |                                       |                   |                   |                   |                   |                                       |                   |                   |                   |                   |
| rural                           | 16.8 (15.4, 18.1)                     | 13.8 (11.9, 15.8) | 15.4 (13.9, 16.8) | 18.8 (17.5, 20.2) | 19.8 (18.4, 21.1) | 18.1 (17.4, 18.8)                     | 15.1 (13.6, 16.7) | 16.7 (15.9, 17.5) | 20.1 (19.6, 20.7) | 21.1 (20.5, 21.7) |
| urban                           | 17.2 (15.8, 18.6)                     | 14.3 (12.4, 16.3) | 15.8 (14.3, 17.2) | 19.2 (17.8, 20.5) | 20.1 (18.8, 21.5) | 18.3 (17.6, 19.1)                     | 15.5 (13.9, 17.0) | 16.9 (16.1, 17.8) | 20.4 (19.8, 20.9) | 21.3 (20.7, 21.9) |
| urban-rural difference          | 0.4 (-0.1, 1.0)                       | 0.5 (-0.3, 1.3)   | 0.4 (-0.2, 1.0)   | 0.4 (-0.2, 0.9)   | 0.3 (-0.3, 0.9)   | 0.3 (-0.2, 0.7)                       | 0.3 (-0.4, 1.1)   | 0.3 (-0.2, 0.8)   | 0.2 (-0.1, 0.6)   | 0.2 (-0.2, 0.5)   |
| <b>Pakistan</b>                 |                                       |                   |                   |                   |                   |                                       |                   |                   |                   |                   |
| rural                           | 16.3 (15.7, 16.9)                     | 13.8 (13.2, 14.5) | 14.7 (14.0, 15.3) | 18.3 (17.7, 18.9) | 19.8 (19.1, 20.5) | 18.0 (17.4, 18.6)                     | 15.5 (14.9, 16.2) | 16.4 (15.7, 17.0) | 20.0 (19.4, 20.6) | 21.5 (20.9, 22.1) |
| urban                           | 16.6 (16.0, 17.3)                     | 14.0 (13.3, 14.6) | 14.9 (14.3, 15.5) | 18.7 (18.0, 19.3) | 20.3 (19.6, 20.9) | 18.3 (17.7, 18.9)                     | 15.6 (14.9, 16.3) | 16.6 (15.9, 17.2) | 20.3 (19.7, 20.9) | 21.9 (21.2, 22.5) |
| urban-rural difference          | 0.3 (-0.1, 0.7)                       | 0.2 (-0.3, 0.6)   | 0.3 (-0.1, 0.6)   | 0.4 (0.0, 0.7)    | 0.4 (0.0, 0.9)    | 0.2 (-0.1, 0.6)                       | 0.1 (-0.3, 0.5)   | 0.2 (-0.1, 0.5)   | 0.3 (0.0, 0.7)    | 0.4 (0.0, 0.8)    |
| <b>Sri Lanka</b>                |                                       |                   |                   |                   |                   |                                       |                   |                   |                   |                   |
| rural                           | 16.4 (15.0, 17.8)                     | 13.5 (11.6, 15.4) | 14.9 (13.4, 16.4) | 18.5 (17.1, 19.8) | 19.5 (17.9, 21.0) | 17.7 (16.7, 18.7)                     | 14.9 (13.2, 16.6) | 16.3 (15.2, 17.4) | 19.8 (18.9, 20.7) | 20.8 (19.7, 21.9) |
| urban                           | 16.8 (15.4, 18.3)                     | 13.9 (12.0, 15.8) | 15.3 (13.8, 16.9) | 18.9 (17.4, 20.3) | 19.9 (18.2, 21.5) | 18.1 (16.9, 19.2)                     | 15.2 (13.5, 16.9) | 16.6 (15.4, 17.8) | 20.2 (19.1, 21.2) | 21.2 (19.9, 22.5) |
| urban-rural difference          | 0.4 (-0.3, 1.1)                       | 0.4 (-0.4, 1.2)   | 0.4 (-0.3, 1.1)   | 0.4 (-0.3, 1.1)   | 0.4 (-0.5, 1.3)   | 0.4 (-0.3, 1.0)                       | 0.4 (-0.4, 1.2)   | 0.4 (-0.3, 1.0)   | 0.4 (-0.3, 1.1)   | 0.4 (-0.5, 1.2)   |
| <b>Sub-Saharan Africa</b>       |                                       |                   |                   |                   |                   |                                       |                   |                   |                   |                   |
| <b>Central Africa</b>           |                                       |                   |                   |                   |                   |                                       |                   |                   |                   |                   |
| <b>Angola</b>                   |                                       |                   |                   |                   |                   |                                       |                   |                   |                   |                   |
| rural                           | 17.0 (15.2, 18.7)                     | 14.1 (11.9, 16.4) | 15.3 (13.5, 17.1) | 19.1 (17.4, 20.8) | 20.6 (18.7, 22.5) | 17.8 (16.3, 19.3)                     | 14.9 (12.8, 17.0) | 16.1 (14.5, 17.7) | 19.9 (18.4, 21.4) | 21.4 (19.7, 23.1) |
| urban                           | 17.7 (16.0, 19.5)                     | 15.0 (12.8, 17.2) | 16.0 (14.3, 17.9) | 19.7 (18.0, 21.5) | 21.1 (19.2, 23.1) | 18.4 (17.0, 19.9)                     | 15.8 (13.7, 17.8) | 16.8 (15.2, 18.4) | 20.5 (19.0, 21.9) | 21.9 (20.2, 23.5) |
| urban-rural difference          | 0.7 (0.0, 1.4)                        | 0.9 (0.0, 1.8)    | 0.8 (0.0, 1.5)    | 0.7 (-0.1, 1.4)   | 0.6 (-0.3, 1.4)   | 0.6 (0.0, 1.3)                        | 0.8 (-0.1, 1.7)   | 0.7 (0.0, 1.4)    | 0.6 (-0.1, 1.3)   | 0.5 (-0.4, 1.3)   |
| <b>Central African Republic</b> |                                       |                   |                   |                   |                   |                                       |                   |                   |                   |                   |
| rural                           | 17.3 (15.3, 19.3)                     | 14.4 (12.0, 16.8) | 15.6 (13.6, 17.6) | 19.4 (17.3, 21.5) | 20.7 (17.8, 23.7) | 18.2 (16.2, 20.3)                     | 15.4 (13.0, 17.8) | 16.6 (14.6, 18.6) | 20.4 (18.4, 22.4) | 21.7 (18.8, 24.6) |
| urban                           | 18.0 (16.0, 20.1)                     | 15.3 (12.9, 17.8) | 16.4 (14.4, 18.4) | 20.1 (18.0, 22.2) | 21.3 (18.3, 24.3) | 18.9 (16.9, 21.0)                     | 16.2 (13.8, 18.6) | 17.3 (15.3, 19.3) | 21.0 (18.9, 23.1) | 22.2 (19.3, 25.1) |
| urban-rural difference          | 0.7 (0.0, 1.4)                        | 0.9 (0.0, 1.8)    | 0.8 (0.0, 1.5)    | 0.7 (-0.1, 1.4)   | 0.6 (-0.3, 1.5)   | 0.7 (0.0, 1.3)                        | 0.8 (0.0, 1.7)    | 0.7 (0.0, 1.4)    | 0.6 (-0.1, 1.3)   | 0.5 (-0.4, 1.4)   |
| <b>Congo</b>                    |                                       |                   |                   |                   |                   |                                       |                   |                   |                   |                   |
| rural                           | 17.1 (16.4, 17.8)                     | 13.9 (12.9, 14.9) | 15.4 (14.6, 16.1) | 19.4 (18.8, 20.0) | 20.7 (20.1, 21.3) | 17.7 (16.5, 18.9)                     | 14.5 (13.1, 16.0) | 16.0 (14.7, 17.3) | 20.0 (18.9, 21.2) | 21.3 (20.1, 22.5) |
| urban                           | 17.6 (16.9, 18.3)                     | 14.6 (13.8, 15.4) | 15.9 (15.2, 16.7) | 19.8 (19.1, 20.5) | 21.0 (20.2, 21.7) | 18.1 (16.9, 19.3)                     | 15.2 (13.9, 16.4) | 16.4 (15.2, 17.7) | 20.3 (19.1, 21.5) | 21.5 (20.3, 22.7) |
| urban-rural difference          | 0.5 (-0.1, 1.1)                       | 0.7 (-0.2, 1.6)   | 0.6 (-0.1, 1.2)   | 0.4 (-0.2, 1.0)   | 0.3 (-0.4, 0.9)   | 0.4 (-0.1, 1.0)                       | 0.6 (-0.2, 1.5)   | 0.5 (-0.1, 1.1)   | 0.3 (-0.2, 0.8)   | 0.2 (-0.4, 0.8)   |
| <b>DR Congo</b>                 |                                       |                   |                   |                   |                   |                                       |                   |                   |                   |                   |
| rural                           | 17.4 (16.0, 18.8)                     | 14.8 (12.7, 16.9) | 16.0 (14.5, 17.5) | 19.4 (18.1, 20.8) | 20.3 (19.0, 21.7) | 18.6 (17.6, 19.7)                     | 15.9 (14.1, 17.8) | 17.1 (16.0, 18.4) | 20.6 (19.6, 21.6) | 21.5 (20.5, 22.5) |
| urban                           | 18.2 (16.8, 19.7)                     | 15.8 (13.8, 17.8) | 16.8 (15.3, 18.3) | 20.1 (18.8, 21.5) | 20.9 (19.5, 22.3) | 19.5 (18.4, 20.6)                     | 17.0 (15.3, 18.9) | 18.1 (17.0, 19.3) | 21.4 (20.4, 22.4) | 22.1 (21.1, 23.2) |
| urban-rural difference          | 0.8 (0.1, 1.4)                        | 1.0 (0.1, 1.9)    | 0.8 (0.2, 1.5)    | 0.7 (0.1, 1.2)    | 0.5 (-0.1, 1.1)   | 0.9 (0.4, 1.4)                        | 1.1 (0.3, 2.0)    | 0.9 (0.4, 1.6)    | 0.8 (0.3, 1.3)    | 0.7 (0.1, 1.2)    |
| <b>Equatorial Guinea</b>        |                                       |                   |                   |                   |                   |                                       |                   |                   |                   |                   |
| rural                           | 17.3 (15.3, 19.4)                     | 14.4 (12.0, 16.9) | 15.7 (13.7, 17.7) | 19.5 (17.4, 21.6) | 20.7 (17.9, 23.7) | 18.3 (16.2, 20.3)                     | 15.4 (12.9, 17.8) | 16.6 (14.6, 18.6) | 20.4 (18.4, 22.4) | 21.7 (18.7, 24.6) |
| urban                           | 18.0 (16.0, 20.1)                     | 15.3 (12.9, 17.8) | 16.4 (14.4, 18.5) | 20.1 (18.0, 22.3) | 21.3 (18.4, 24.4) | 18.9 (16.9, 21.0)                     | 16.2 (13.7, 18.6) | 17.3 (15.3, 19.3) | 21.0 (18.9, 23.1) | 22.2 (19.2, 25.1) |
| urban-rural difference          | 0.7 (0.0, 1.4)                        | 0.9 (0.0, 1.8)    | 0.8 (0.0, 1.5)    | 0.7 (-0.1, 1.4)   | 0.6 (-0.4, 1.5)   | 0.7 (0.0, 1.4)                        | 0.8 (-0.1, 1.7)   | 0.7 (0.0, 1.4)    | 0.6 (-0.1, 1.3)   | 0.5 (-0.4, 1.4)   |
| <b>Gabon</b>                    |                                       |                   |                   |                   |                   |                                       |                   |                   |                   |                   |
| rural                           | 17.6 (16.1, 19.2)                     | 14.7 (12.6, 16.9) | 16.0 (14.4, 17.6) | 19.8 (18.3, 21.3) | 21.0 (19.3, 22.6) | 18.6 (17.3, 19.9)                     | 15.7 (13.8, 17.7) | 17.0 (15.6, 18.4) | 20.8 (19.6, 22.1) | 22.0 (20.7, 23.3) |
| urban                           | 18.4 (16.8, 19.9)                     | 15.6 (13.5, 17.7) | 16.7 (15.1, 18.4) | 20.5 (19.0, 22.0) | 21.6 (19.9, 23.1) | 19.3 (18.0, 20.6)                     | 16.5 (14.6, 18.4) | 17.7 (16.3, 19.1) | 21.4 (20.2, 22.6) | 22.5 (21.1, 23.8) |
| urban-rural difference          | 0.7 (0.0, 1.4)                        | 0.8 (-0.1, 1.7)   | 0.8 (0.0, 1.4)    | 0.7 (-0.1, 1.4)   | 0.6 (-0.2, 1.4)   | 0.6 (0.1, 1.2)                        | 0.8 (-0.1, 1.6)   | 0.7 (0.1, 1.3)    | 0.6 (0.0, 1.2)    | 0.5 (-0.2, 1.2)   |
| <b>East Africa</b>              |                                       |                   |                   |                   |                   |                                       |                   |                   |                   |                   |
| <b>Burundi</b>                  |                                       |                   |                   |                   |                   |                                       |                   |                   |                   |                   |
| rural                           | 16.6 (15.2, 18.2)                     | 13.6 (11.6, 15.6) | 14.7 (13.1, 16.3) | 18.9 (17.4, 20.3) | 20.7 (19.3, 22.3) | 17.4 (16.5, 18.2)                     | 14.3 (12.7, 15.9) | 15.4 (14.4, 16.4) | 19.6 (18.9, 20.4) | 21.5 (20.7, 22.3) |
| urban                           | 17.7 (16.2, 19.2)                     | 14.9 (12.9, 17.0) | 15.8 (14.3, 17.4) | 19.8 (18.3, 21.3) | 21.5 (20.0, 23.1) | 18.2 (17.3, 19.1)                     | 15.4 (13.8, 17.1) | 16.4 (15.3, 17.4) | 20.3 (19.5, 21.1) | 22.0 (21.2, 22.8) |
| urban-rural difference          | 1.0 (0.4, 1.7)                        | 1.3 (0.5, 2.2)    | 1.1 (0.5, 1.8)    | 0.9 (0.3, 1.5)    | 0.8 (0.0, 1.5)    | 0.8 (0.4, 1.3)                        | 1.1 (0.4, 1.9)    | 0.9 (0.4, 1.5)    | 0.7 (0.3, 1.1)    | 0.5 (0.1, 1.0)    |
| <b>Comoros</b>                  |                                       |                   |                   |                   |                   |                                       |                   |                   |                   |                   |
| rural                           | 17.7 (16.1, 19.2)                     | 14.6 (12.6, 16.6) | 15.9 (14.4, 17.6) | 19.9 (18.4, 21.5) | 21.2 (19.6, 22.7) | 19.0 (17.8, 20.2)                     | 15.9 (14.1, 17.7) | 17.2 (15.9, 18.6) | 21.2 (20.1, 22.4) | 22.5 (21.3, 23.7) |
| urban                           | 18.5 (17.0, 20.1)                     | 15.7 (13.7, 17.7) | 16.8 (15.3, 18.4) | 20.7 (19.1, 22.2) | 21.7 (20.1, 23.4) | 19.5 (18.3, 20.7)                     | 16.6 (14.8, 18.4) | 17.8 (16.5, 19.1) | 21.6 (20.5, 22.8) | 22.7 (21.4, 23.9) |
| urban-rural difference          | 0.8 (0.2, 1.4)                        | 1.1 (0.3, 1.9)    | 0.9 (0.3, 1.6)    | 0.7 (0.1, 1.3)    | 0.6 (-0.2, 1.3)   | 0.5 (0.0, 1.0)                        | 0.7 (0.0, 1.5)    | 0.6 (0.0, 1.1)    | 0.4 (-0.1, 0.9)   | 0.2 (-0.4, 0.9)   |
| <b>Djibouti</b>                 |                                       |                   |                   |                   |                   |                                       |                   |                   |                   |                   |

| Girls                  | Mean BMI in 1990 (kg/m <sup>2</sup> ) |                   |                   |                   |                   | Mean BMI in 2020 (kg/m <sup>2</sup> ) |                   |                   |                   |                   |
|------------------------|---------------------------------------|-------------------|-------------------|-------------------|-------------------|---------------------------------------|-------------------|-------------------|-------------------|-------------------|
|                        | Age-standardised                      | 5 years           | 10 years          | 15 years          | 19 years          | Age-standardised                      | 5 years           | 10 years          | 15 years          | 19 years          |
| rural                  | 17.1 (15.1, 19.2)                     | 14.2 (11.9, 16.4) | 15.4 (13.4, 17.4) | 19.4 (17.3, 21.4) | 20.7 (17.8, 23.5) | 18.3 (16.4, 20.2)                     | 15.3 (13.2, 17.6) | 16.6 (14.7, 18.4) | 20.5 (18.5, 22.5) | 21.9 (19.1, 24.6) |
| urban                  | 18.1 (16.1, 20.1)                     | 15.3 (12.9, 17.6) | 16.4 (14.4, 18.4) | 20.3 (18.2, 22.3) | 21.5 (18.6, 24.3) | 19.0 (17.1, 20.9)                     | 16.2 (13.9, 18.3) | 17.3 (15.4, 19.2) | 21.2 (19.2, 23.1) | 22.5 (19.6, 25.2) |
| urban-rural difference | 1.0 (0.3, 1.6)                        | 1.1 (0.3, 1.9)    | 1.0 (0.4, 1.7)    | 0.9 (0.2, 1.6)    | 0.8 (0.0, 1.7)    | 0.7 (0.1, 1.3)                        | 0.8 (0.0, 1.6)    | 0.7 (0.1, 1.4)    | 0.6 (0.0, 1.3)    | 0.6 (-0.3, 1.4)   |
| <b>Eritrea</b>         |                                       |                   |                   |                   |                   |                                       |                   |                   |                   |                   |
| rural                  | 16.5 (14.9, 18.1)                     | 13.6 (11.5, 15.6) | 14.8 (13.1, 16.5) | 18.7 (17.1, 20.2) | 19.8 (18.0, 21.6) | 17.7 (16.1, 19.2)                     | 14.8 (12.7, 16.7) | 16.0 (14.4, 17.6) | 19.8 (18.3, 21.3) | 21.0 (19.2, 22.7) |
| urban                  | 17.5 (15.8, 19.1)                     | 14.7 (12.6, 16.7) | 15.8 (14.1, 17.5) | 19.6 (18.0, 21.1) | 20.7 (18.8, 22.5) | 18.4 (16.9, 19.9)                     | 15.6 (13.6, 17.6) | 16.7 (15.1, 18.3) | 20.5 (19.0, 22.0) | 21.6 (19.7, 23.3) |
| urban-rural difference | 1.0 (0.3, 1.6)                        | 1.1 (0.3, 2.0)    | 1.0 (0.4, 1.7)    | 0.9 (0.2, 1.6)    | 0.8 (0.0, 1.7)    | 0.7 (0.1, 1.3)                        | 0.8 (0.1, 1.7)    | 0.7 (0.1, 1.4)    | 0.7 (0.0, 1.3)    | 0.6 (-0.3, 1.4)   |
| <b>Ethiopia</b>        |                                       |                   |                   |                   |                   |                                       |                   |                   |                   |                   |
| rural                  | 16.0 (14.6, 17.3)                     | 13.1 (11.2, 15.0) | 14.2 (12.8, 15.6) | 18.1 (16.8, 19.4) | 19.6 (18.4, 20.9) | 17.0 (16.2, 17.8)                     | 14.1 (12.5, 15.7) | 15.3 (14.3, 16.2) | 19.2 (18.5, 19.8) | 20.7 (20.0, 21.4) |
| urban                  | 17.2 (15.9, 18.5)                     | 14.4 (12.6, 16.4) | 15.5 (14.0, 16.9) | 19.3 (18.0, 20.6) | 20.7 (19.5, 22.0) | 17.9 (17.0, 18.7)                     | 15.1 (13.5, 16.7) | 16.1 (15.2, 17.1) | 20.0 (19.2, 20.7) | 21.4 (20.7, 22.1) |
| urban-rural difference | 1.2 (0.7, 1.8)                        | 1.4 (0.6, 2.2)    | 1.3 (0.7, 1.9)    | 1.2 (0.7, 1.7)    | 1.1 (0.6, 1.6)    | 0.9 (0.4, 1.3)                        | 1.0 (0.2, 1.7)    | 0.9 (0.4, 1.4)    | 0.8 (0.4, 1.2)    | 0.7 (0.3, 1.1)    |
| <b>Kenya</b>           |                                       |                   |                   |                   |                   |                                       |                   |                   |                   |                   |
| rural                  | 17.2 (15.7, 18.7)                     | 14.3 (12.3, 16.2) | 15.3 (13.8, 16.9) | 19.4 (18.0, 20.8) | 21.3 (19.8, 22.7) | 18.5 (17.5, 19.5)                     | 15.6 (14.0, 17.2) | 16.6 (15.6, 17.7) | 20.7 (19.8, 21.6) | 22.6 (21.7, 23.4) |
| urban                  | 18.4 (16.9, 19.9)                     | 15.5 (13.6, 17.4) | 16.5 (15.0, 18.1) | 20.5 (19.1, 22.0) | 22.4 (21.0, 23.8) | 19.4 (18.5, 20.4)                     | 16.5 (14.9, 18.1) | 17.5 (16.5, 18.6) | 21.5 (20.7, 22.4) | 23.4 (22.5, 24.3) |
| urban-rural difference | 1.2 (0.6, 1.7)                        | 1.2 (0.5, 2.0)    | 1.2 (0.6, 1.8)    | 1.2 (0.6, 1.7)    | 1.1 (0.6, 1.7)    | 0.9 (0.4, 1.4)                        | 0.9 (0.2, 1.7)    | 0.9 (0.4, 1.4)    | 0.9 (0.5, 1.3)    | 0.8 (0.4, 1.3)    |
| <b>Madagascar</b>      |                                       |                   |                   |                   |                   |                                       |                   |                   |                   |                   |
| rural                  | 16.7 (15.2, 18.2)                     | 13.7 (11.7, 15.8) | 15.1 (13.6, 16.7) | 18.8 (17.3, 20.3) | 19.7 (18.3, 21.2) | 17.6 (16.3, 18.9)                     | 14.7 (12.8, 16.6) | 16.0 (14.7, 17.4) | 19.8 (18.5, 21.0) | 20.7 (19.4, 21.9) |
| urban                  | 17.5 (16.0, 19.0)                     | 14.8 (12.7, 16.8) | 16.0 (14.4, 17.5) | 19.5 (18.1, 21.0) | 20.3 (18.9, 21.8) | 18.1 (16.8, 19.4)                     | 15.4 (13.6, 17.3) | 16.6 (15.2, 17.9) | 20.2 (18.9, 21.4) | 21.0 (19.7, 22.2) |
| urban-rural difference | 0.8 (0.3, 1.3)                        | 1.0 (0.2, 1.8)    | 0.9 (0.3, 1.5)    | 0.7 (0.2, 1.2)    | 0.6 (0.0, 1.2)    | 0.5 (0.0, 1.0)                        | 0.7 (0.0, 1.6)    | 0.6 (0.0, 1.2)    | 0.4 (-0.1, 0.9)   | 0.3 (-0.3, 0.8)   |
| <b>Malawi</b>          |                                       |                   |                   |                   |                   |                                       |                   |                   |                   |                   |
| rural                  | 17.3 (16.0, 18.6)                     | 14.3 (12.4, 16.2) | 15.4 (14.0, 16.8) | 19.5 (18.3, 20.8) | 21.1 (19.8, 22.3) | 18.6 (17.8, 19.4)                     | 15.6 (14.0, 17.2) | 16.8 (15.8, 17.7) | 20.9 (20.1, 21.6) | 22.4 (21.7, 23.1) |
| urban                  | 18.4 (17.1, 19.8)                     | 15.5 (13.5, 17.4) | 16.6 (15.2, 18.0) | 20.7 (19.4, 21.9) | 22.1 (20.8, 23.4) | 19.4 (18.5, 20.3)                     | 16.5 (14.9, 18.1) | 17.6 (16.6, 18.6) | 21.6 (20.9, 22.4) | 23.1 (22.3, 23.9) |
| urban-rural difference | 1.2 (0.7, 1.7)                        | 1.2 (0.5, 2.0)    | 1.2 (0.6, 1.7)    | 1.1 (0.7, 1.6)    | 1.1 (0.6, 1.6)    | 0.8 (0.3, 1.3)                        | 0.9 (0.1, 1.6)    | 0.8 (0.3, 1.4)    | 0.8 (0.4, 1.2)    | 0.7 (0.3, 1.2)    |
| <b>Mauritius</b>       |                                       |                   |                   |                   |                   |                                       |                   |                   |                   |                   |
| rural                  | 17.6 (16.1, 19.1)                     | 14.7 (12.7, 16.7) | 16.0 (14.5, 17.5) | 19.7 (18.3, 21.2) | 20.7 (18.9, 22.6) | 19.1 (18.3, 19.9)                     | 16.2 (14.7, 17.7) | 17.5 (16.7, 18.3) | 21.2 (20.6, 21.9) | 22.3 (20.9, 23.5) |
| urban                  | 18.5 (17.0, 20.0)                     | 15.8 (13.8, 17.7) | 17.0 (15.5, 18.4) | 20.6 (19.1, 22.1) | 21.5 (19.6, 23.4) | 19.7 (18.9, 20.5)                     | 17.0 (15.4, 18.5) | 18.2 (17.3, 19.0) | 21.8 (21.0, 22.6) | 22.7 (21.3, 24.2) |
| urban-rural difference | 0.9 (0.3, 1.6)                        | 1.1 (0.3, 1.9)    | 1.0 (0.3, 1.6)    | 0.9 (0.2, 1.6)    | 0.8 (-0.1, 1.6)   | 0.6 (0.0, 1.2)                        | 0.7 (-0.1, 1.6)   | 0.6 (0.0, 1.3)    | 0.5 (-0.1, 1.2)   | 0.5 (-0.4, 1.3)   |
| <b>Mozambique</b>      |                                       |                   |                   |                   |                   |                                       |                   |                   |                   |                   |
| rural                  | 17.4 (16.0, 18.8)                     | 14.6 (12.8, 16.4) | 15.8 (14.4, 17.2) | 19.5 (18.1, 20.9) | 20.7 (19.3, 22.1) | 18.4 (17.4, 19.2)                     | 15.5 (14.1, 17.0) | 16.8 (15.8, 17.7) | 20.5 (19.5, 21.3) | 21.7 (20.7, 22.6) |
| urban                  | 18.5 (17.2, 19.9)                     | 15.7 (14.0, 17.5) | 16.9 (15.5, 18.3) | 20.6 (19.2, 22.0) | 21.8 (20.4, 23.2) | 19.0 (18.1, 19.9)                     | 16.2 (14.8, 17.6) | 17.4 (16.5, 18.3) | 21.1 (20.2, 22.0) | 22.3 (21.4, 23.2) |
| urban-rural difference | 1.1 (0.6, 1.7)                        | 1.1 (0.4, 1.9)    | 1.1 (0.5, 1.7)    | 1.1 (0.6, 1.6)    | 1.1 (0.5, 1.7)    | 0.7 (0.2, 1.1)                        | 0.7 (0.0, 1.4)    | 0.7 (0.2, 1.2)    | 0.6 (0.2, 1.1)    | 0.6 (0.1, 1.1)    |
| <b>Rwanda</b>          |                                       |                   |                   |                   |                   |                                       |                   |                   |                   |                   |
| rural                  | 17.3 (16.0, 18.6)                     | 14.2 (12.3, 16.0) | 15.2 (13.8, 16.5) | 19.7 (18.4, 20.9) | 22.0 (20.7, 23.3) | 18.6 (17.9, 19.2)                     | 15.4 (13.9, 16.9) | 16.4 (15.6, 17.1) | 20.9 (20.4, 21.4) | 23.2 (22.7, 23.8) |
| urban                  | 18.5 (17.1, 19.7)                     | 15.5 (13.6, 17.4) | 16.4 (15.0, 17.7) | 20.7 (19.4, 21.9) | 22.9 (21.6, 24.2) | 19.5 (18.8, 20.2)                     | 16.5 (15.0, 18.1) | 17.4 (16.6, 18.2) | 21.7 (21.2, 22.3) | 24.0 (23.4, 24.5) |
| urban-rural difference | 1.1 (0.6, 1.6)                        | 1.3 (0.6, 2.1)    | 1.2 (0.6, 1.7)    | 1.0 (0.5, 1.5)    | 0.9 (0.4, 1.4)    | 0.9 (0.5, 1.4)                        | 1.1 (0.4, 1.9)    | 1.0 (0.5, 1.5)    | 0.8 (0.5, 1.2)    | 0.7 (0.3, 1.1)    |
| <b>Seychelles</b>      |                                       |                   |                   |                   |                   |                                       |                   |                   |                   |                   |
| rural                  | 18.1 (17.0, 19.2)                     | 14.3 (13.2, 15.4) | 17.0 (15.8, 18.0) | 20.7 (19.6, 21.8) | 20.2 (18.7, 21.7) | 20.2 (19.8, 20.6)                     | 16.3 (16.0, 16.7) | 19.0 (18.7, 19.4) | 22.7 (22.4, 23.1) | 22.3 (21.1, 23.4) |
| urban                  | 18.6 (17.5, 19.7)                     | 14.8 (13.7, 15.9) | 17.4 (16.3, 18.5) | 21.1 (20.0, 22.2) | 20.6 (19.1, 22.1) | 20.3 (19.9, 20.7)                     | 16.5 (16.1, 16.9) | 19.1 (18.8, 19.5) | 22.8 (22.4, 23.2) | 22.3 (21.2, 23.5) |
| urban-rural difference | 0.5 (0.1, 0.8)                        | 0.5 (0.2, 0.9)    | 0.5 (0.2, 0.8)    | 0.4 (0.1, 0.8)    | 0.4 (0.0, 0.8)    | 0.1 (-0.1, 0.4)                       | 0.2 (-0.1, 0.4)   | 0.1 (-0.1, 0.4)   | 0.1 (-0.2, 0.3)   | 0.0 (-0.3, 0.4)   |
| <b>Somalia</b>         |                                       |                   |                   |                   |                   |                                       |                   |                   |                   |                   |
| rural                  | 17.2 (15.2, 19.2)                     | 14.2 (11.9, 16.5) | 15.4 (13.4, 17.3) | 19.4 (17.3, 21.4) | 20.7 (17.8, 23.6) | 18.3 (16.4, 20.3)                     | 15.3 (13.2, 17.5) | 16.6 (14.7, 18.4) | 20.5 (18.6, 22.5) | 21.9 (19.1, 24.7) |
| urban                  | 18.1 (16.1, 20.1)                     | 15.3 (12.9, 17.6) | 16.4 (14.4, 18.4) | 20.3 (18.2, 22.3) | 21.5 (18.7, 24.4) | 19.0 (17.1, 20.9)                     | 16.2 (14.0, 18.3) | 17.3 (15.4, 19.2) | 21.2 (19.2, 23.1) | 22.4 (19.6, 25.3) |
| urban-rural difference | 1.0 (0.3, 1.6)                        | 1.1 (0.3, 1.9)    | 1.0 (0.4, 1.7)    | 0.9 (0.2, 1.6)    | 0.8 (0.0, 1.7)    | 0.7 (0.1, 1.3)                        | 0.8 (0.0, 1.6)    | 0.7 (0.1, 1.4)    | 0.6 (-0.1, 1.3)   | 0.6 (-0.3, 1.4)   |
| <b>South Sudan</b>     |                                       |                   |                   |                   |                   |                                       |                   |                   |                   |                   |
| rural                  | 17.3 (15.6, 19.1)                     | 14.3 (12.2, 16.5) | 15.5 (13.7, 17.3) | 19.5 (17.8, 21.3) | 21.1 (19.1, 23.3) | 18.6 (17.2, 20.0)                     | 15.5 (13.6, 17.5) | 16.8 (15.2, 18.3) | 20.8 (19.4, 22.2) | 22.4 (20.5, 24.1) |
| urban                  | 18.3 (16.6, 20.0)                     | 15.4 (13.3, 17.6) | 16.5 (14.7, 18.3) | 20.5 (18.8, 22.2) | 22.0 (19.9, 24.1) | 19.3 (17.9, 20.6)                     | 16.4 (14.4, 18.3) | 17.5 (16.0, 19.0) | 21.4 (20.1, 22.7) | 22.9 (21.3, 24.6) |
| urban-rural difference | 1.0 (0.3, 1.6)                        | 1.1 (0.3, 1.9)    | 1.0 (0.4, 1.7)    | 0.9 (0.3, 1.6)    | 0.8 (0.0, 1.7)    | 0.7 (0.1, 1.4)                        | 0.8 (0.1, 1.6)    | 0.7 (0.1, 1.4)    | 0.6 (0.0, 1.3)    | 0.6 (-0.2, 1.4)   |
| <b>Sudan</b>           |                                       |                   |                   |                   |                   |                                       |                   |                   |                   |                   |
| rural                  | 16.6 (14.9, 18.2)                     | 13.7 (11.6, 15.8) | 14.9 (13.2, 16.7) | 18.7 (17.1, 20.3) | 19.8 (18.0, 21.4) | 17.5 (16.3, 18.8)                     | 14.7 (12.9, 16.5) | 15.9 (14.4, 17.4) | 19.7 (18.5, 20.9) | 20.7 (19.7, 21.8) |
| urban                  | 17.6 (15.9, 19.3)                     | 14.8 (12.7, 16.9) | 16.0 (14.2, 17.8) | 19.7 (18.1, 21.4) | 20.8 (19.0, 22.5) | 18.4 (17.1, 19.6)                     | 15.5 (13.7, 17.4) | 16.8 (15.3, 18.3) | 20.5 (19.2, 21.7) | 21.5 (20.3, 22.7) |
| urban-rural difference | 1.0 (0.4, 1.7)                        | 1.1 (0.3, 1.9)    | 1.0 (0.4, 1.7)    | 1.0 (0.3, 1.7)    | 1.0 (0.2, 1.8)    | 0.8 (0.3, 1.4)                        | 0.9 (0.1, 1.7)    | 0.8 (0.2, 1.5)    | 0.8 (0.2, 1.4)    | 0.8 (0.1, 1.5)    |

| Girls                  | Mean BMI in 1990 (kg/m <sup>2</sup> ) |                   |                   |                   |                   | Mean BMI in 2020 (kg/m <sup>2</sup> ) |                   |                   |                   |                   |
|------------------------|---------------------------------------|-------------------|-------------------|-------------------|-------------------|---------------------------------------|-------------------|-------------------|-------------------|-------------------|
|                        | Age-standardised                      | 5 years           | 10 years          | 15 years          | 19 years          | Age-standardised                      | 5 years           | 10 years          | 15 years          | 19 years          |
| <b>Tanzania</b>        |                                       |                   |                   |                   |                   |                                       |                   |                   |                   |                   |
| rural                  | 17.0 (15.5, 18.4)                     | 14.2 (12.5, 15.9) | 14.9 (13.5, 16.4) | 19.2 (17.8, 20.6) | 21.2 (19.8, 22.7) | 18.0 (17.2, 18.9)                     | 15.3 (14.0, 16.6) | 16.0 (15.1, 16.8) | 20.2 (19.4, 21.0) | 22.3 (21.4, 23.1) |
| urban                  | 18.1 (16.6, 19.5)                     | 15.5 (13.6, 17.2) | 16.1 (14.6, 17.5) | 20.2 (18.8, 21.6) | 22.2 (20.8, 23.6) | 18.9 (18.1, 19.8)                     | 16.3 (14.9, 17.7) | 16.9 (16.0, 17.9) | 21.1 (20.3, 21.9) | 23.1 (22.2, 23.9) |
| urban-rural difference | 1.1 (0.5, 1.7)                        | 1.2 (0.4, 2.0)    | 1.1 (0.5, 1.7)    | 1.0 (0.5, 1.6)    | 1.0 (0.3, 1.6)    | 0.9 (0.5, 1.4)                        | 1.1 (0.3, 1.8)    | 1.0 (0.5, 1.5)    | 0.9 (0.5, 1.3)    | 0.8 (0.4, 1.3)    |
| <b>Uganda</b>          |                                       |                   |                   |                   |                   |                                       |                   |                   |                   |                   |
| rural                  | 17.6 (16.3, 18.9)                     | 15.0 (13.5, 16.4) | 15.7 (14.4, 17.0) | 19.7 (18.4, 21.1) | 21.2 (19.8, 22.5) | 18.5 (17.7, 19.2)                     | 15.8 (14.9, 16.7) | 16.6 (15.7, 17.4) | 20.6 (19.8, 21.4) | 22.1 (21.2, 22.8) |
| urban                  | 18.8 (17.4, 20.1)                     | 16.4 (14.9, 18.0) | 17.0 (15.6, 18.3) | 20.8 (19.5, 22.1) | 22.1 (20.7, 23.4) | 19.3 (18.5, 20.2)                     | 17.0 (15.9, 18.1) | 17.5 (16.6, 18.4) | 21.3 (20.5, 22.1) | 22.6 (21.8, 23.4) |
| urban-rural difference | 1.2 (0.7, 1.7)                        | 1.5 (0.7, 2.3)    | 1.3 (0.7, 1.9)    | 1.0 (0.6, 1.6)    | 0.9 (0.3, 1.4)    | 0.9 (0.4, 1.3)                        | 1.1 (0.4, 1.9)    | 0.9 (0.4, 1.4)    | 0.7 (0.3, 1.1)    | 0.6 (0.1, 1.0)    |
| <b>Zambia</b>          |                                       |                   |                   |                   |                   |                                       |                   |                   |                   |                   |
| rural                  | 17.0 (15.6, 18.4)                     | 14.1 (12.1, 16.0) | 15.3 (13.8, 16.7) | 19.2 (17.8, 20.6) | 20.7 (19.3, 22.1) | 18.5 (17.6, 19.4)                     | 15.5 (13.9, 17.2) | 16.7 (15.7, 17.8) | 20.7 (19.9, 21.5) | 22.2 (21.4, 23.0) |
| urban                  | 18.1 (16.7, 19.5)                     | 15.3 (13.3, 17.2) | 16.4 (14.9, 17.8) | 20.2 (18.9, 21.6) | 21.6 (20.3, 23.0) | 19.3 (18.4, 20.3)                     | 16.5 (14.8, 18.2) | 17.6 (16.5, 18.6) | 21.5 (20.6, 22.3) | 22.9 (22.0, 23.7) |
| urban-rural difference | 1.1 (0.5, 1.6)                        | 1.2 (0.4, 2.0)    | 1.1 (0.5, 1.7)    | 1.0 (0.5, 1.5)    | 0.9 (0.4, 1.5)    | 0.8 (0.4, 1.3)                        | 0.9 (0.2, 1.7)    | 0.9 (0.3, 1.4)    | 0.8 (0.4, 1.2)    | 0.7 (0.2, 1.1)    |
| <b>Southern Africa</b> |                                       |                   |                   |                   |                   |                                       |                   |                   |                   |                   |
| <b>Botswana</b>        |                                       |                   |                   |                   |                   |                                       |                   |                   |                   |                   |
| rural                  | 16.7 (15.1, 18.4)                     | 13.4 (11.2, 15.6) | 15.0 (13.2, 16.7) | 18.9 (17.3, 20.5) | 20.8 (18.9, 22.7) | 17.6 (16.2, 18.9)                     | 14.3 (12.3, 16.2) | 15.9 (14.3, 17.3) | 19.8 (18.5, 21.0) | 21.6 (20.0, 23.2) |
| urban                  | 17.6 (15.9, 19.2)                     | 14.3 (12.2, 16.5) | 15.9 (14.1, 17.6) | 19.7 (18.1, 21.4) | 21.6 (19.7, 23.5) | 18.2 (16.9, 19.5)                     | 14.9 (13.0, 16.9) | 16.5 (15.0, 17.9) | 20.4 (19.1, 21.6) | 22.2 (20.7, 23.7) |
| urban-rural difference | 0.9 (0.2, 1.5)                        | 0.9 (0.1, 1.8)    | 0.9 (0.2, 1.5)    | 0.8 (0.1, 1.6)    | 0.8 (-0.1, 1.7)   | 0.6 (0.0, 1.3)                        | 0.6 (-0.2, 1.5)   | 0.6 (0.0, 1.3)    | 0.6 (-0.1, 1.3)   | 0.6 (-0.3, 1.5)   |
| <b>Lesotho</b>         |                                       |                   |                   |                   |                   |                                       |                   |                   |                   |                   |
| rural                  | 17.9 (16.3, 19.4)                     | 14.4 (12.2, 16.5) | 15.9 (14.2, 17.5) | 20.1 (18.7, 21.6) | 22.6 (21.1, 24.1) | 18.6 (17.5, 19.8)                     | 15.2 (13.3, 17.0) | 16.6 (15.4, 17.9) | 20.9 (19.9, 22.0) | 23.4 (22.3, 24.5) |
| urban                  | 18.7 (17.1, 20.2)                     | 15.3 (13.2, 17.4) | 16.7 (15.1, 18.3) | 20.9 (19.4, 22.3) | 23.3 (21.8, 24.8) | 19.1 (18.0, 20.3)                     | 15.8 (13.9, 17.6) | 17.2 (15.9, 18.4) | 21.4 (20.3, 22.4) | 23.8 (22.7, 24.9) |
| urban-rural difference | 0.8 (0.2, 1.4)                        | 0.9 (0.1, 1.8)    | 0.8 (0.2, 1.5)    | 0.8 (0.2, 1.4)    | 0.7 (0.0, 1.4)    | 0.5 (0.0, 1.0)                        | 0.6 (-0.2, 1.4)   | 0.5 (-0.1, 1.1)   | 0.4 (-0.1, 0.9)   | 0.4 (-0.2, 0.9)   |
| <b>Namibia</b>         |                                       |                   |                   |                   |                   |                                       |                   |                   |                   |                   |
| rural                  | 16.3 (14.7, 17.8)                     | 13.0 (10.8, 15.1) | 14.5 (12.9, 16.0) | 18.4 (17.0, 19.9) | 20.5 (19.0, 22.0) | 17.1 (15.9, 18.3)                     | 13.8 (11.9, 15.7) | 15.3 (14.0, 16.6) | 19.3 (18.2, 20.4) | 21.3 (20.2, 22.5) |
| urban                  | 17.3 (15.8, 18.8)                     | 14.0 (11.9, 16.1) | 15.5 (13.9, 17.0) | 19.4 (18.0, 20.9) | 21.5 (19.9, 23.0) | 18.0 (16.7, 19.2)                     | 14.7 (12.8, 16.6) | 16.2 (14.8, 17.4) | 20.1 (19.0, 21.3) | 22.1 (21.0, 23.3) |
| urban-rural difference | 1.0 (0.4, 1.6)                        | 1.0 (0.2, 1.9)    | 1.0 (0.3, 1.7)    | 1.0 (0.4, 1.6)    | 1.0 (0.3, 1.7)    | 0.8 (0.3, 1.4)                        | 0.9 (0.1, 1.7)    | 0.8 (0.3, 1.4)    | 0.8 (0.3, 1.3)    | 0.8 (0.2, 1.3)    |
| <b>South Africa</b>    |                                       |                   |                   |                   |                   |                                       |                   |                   |                   |                   |
| rural                  | 17.0 (15.9, 18.2)                     | 13.7 (12.5, 14.9) | 15.1 (13.9, 16.2) | 19.2 (18.1, 20.4) | 21.6 (20.5, 22.8) | 19.5 (18.9, 20.1)                     | 16.1 (15.5, 16.7) | 17.5 (16.9, 18.1) | 21.7 (21.1, 22.3) | 24.1 (23.5, 24.7) |
| urban                  | 18.0 (16.8, 19.2)                     | 14.3 (13.1, 15.6) | 15.9 (14.8, 17.2) | 20.3 (19.1, 21.5) | 22.9 (21.7, 24.1) | 19.8 (19.2, 20.4)                     | 16.2 (15.5, 16.8) | 17.8 (17.2, 18.4) | 22.1 (21.5, 22.7) | 24.7 (24.0, 25.4) |
| urban-rural difference | 1.0 (0.5, 1.5)                        | 0.7 (0.1, 1.3)    | 0.9 (0.4, 1.4)    | 1.1 (0.6, 1.6)    | 1.2 (0.7, 1.8)    | 0.3 (0.0, 0.6)                        | 0.0 (-0.3, 0.4)   | 0.2 (-0.1, 0.5)   | 0.4 (0.1, 0.8)    | 0.6 (0.2, 1.0)    |
| <b>Eswatini</b>        |                                       |                   |                   |                   |                   |                                       |                   |                   |                   |                   |
| rural                  | 18.5 (17.0, 20.1)                     | 15.0 (12.8, 17.1) | 16.6 (15.0, 18.3) | 20.9 (19.4, 22.3) | 22.9 (21.4, 24.5) | 19.7 (18.5, 20.9)                     | 16.2 (14.3, 18.1) | 17.8 (16.5, 19.2) | 22.1 (20.9, 23.2) | 24.1 (22.9, 25.3) |
| urban                  | 19.3 (17.7, 20.8)                     | 15.9 (13.7, 17.9) | 17.4 (15.8, 19.0) | 21.6 (20.0, 23.1) | 23.6 (22.0, 25.1) | 20.2 (19.0, 21.5)                     | 16.8 (14.9, 18.7) | 18.3 (17.0, 19.7) | 22.5 (21.3, 23.7) | 24.5 (23.2, 25.8) |
| urban-rural difference | 0.8 (0.1, 1.4)                        | 0.9 (0.0, 1.8)    | 0.8 (0.1, 1.5)    | 0.7 (0.1, 1.4)    | 0.6 (-0.1, 1.4)   | 0.5 (-0.1, 1.1)                       | 0.6 (-0.2, 1.4)   | 0.5 (-0.1, 1.1)   | 0.4 (-0.2, 1.0)   | 0.4 (-0.4, 1.1)   |
| <b>Zimbabwe</b>        |                                       |                   |                   |                   |                   |                                       |                   |                   |                   |                   |
| rural                  | 18.3 (17.2, 19.5)                     | 14.9 (13.0, 16.8) | 16.5 (15.3, 17.7) | 20.5 (19.5, 21.7) | 22.5 (21.5, 23.6) | 18.4 (17.4, 19.4)                     | 15.0 (13.2, 16.8) | 16.6 (15.5, 17.7) | 20.7 (19.7, 21.6) | 22.6 (21.7, 23.6) |
| urban                  | 19.2 (18.0, 20.4)                     | 15.8 (13.9, 17.7) | 17.4 (16.2, 18.7) | 21.4 (20.3, 22.6) | 23.4 (22.3, 24.5) | 19.3 (18.3, 20.4)                     | 15.9 (14.0, 17.7) | 17.5 (16.3, 18.6) | 21.5 (20.6, 22.5) | 23.5 (22.5, 24.5) |
| urban-rural difference | 0.9 (0.3, 1.5)                        | 0.9 (0.1, 1.7)    | 0.9 (0.3, 1.5)    | 0.9 (0.3, 1.4)    | 0.9 (0.3, 1.5)    | 0.9 (0.4, 1.4)                        | 0.9 (0.1, 1.7)    | 0.9 (0.4, 1.5)    | 0.9 (0.5, 1.3)    | 0.9 (0.4, 1.4)    |
| <b>West Africa</b>     |                                       |                   |                   |                   |                   |                                       |                   |                   |                   |                   |
| <b>Benin</b>           |                                       |                   |                   |                   |                   |                                       |                   |                   |                   |                   |
| rural                  | 17.4 (16.0, 18.7)                     | 14.6 (12.7, 16.5) | 15.8 (14.4, 17.2) | 19.4 (18.1, 20.7) | 20.6 (19.3, 21.9) | 18.2 (17.4, 18.9)                     | 15.4 (13.8, 17.0) | 16.6 (15.7, 17.5) | 20.2 (19.5, 20.8) | 21.4 (20.8, 22.1) |
| urban                  | 18.2 (16.8, 19.6)                     | 15.5 (13.6, 17.5) | 16.7 (15.2, 18.1) | 20.1 (18.9, 21.5) | 21.3 (20.0, 22.7) | 18.9 (18.1, 19.7)                     | 16.2 (14.6, 17.8) | 17.4 (16.5, 18.3) | 20.9 (20.2, 21.5) | 22.0 (21.3, 22.7) |
| urban-rural difference | 0.8 (0.3, 1.4)                        | 0.9 (0.2, 1.7)    | 0.9 (0.3, 1.4)    | 0.8 (0.3, 1.3)    | 0.7 (0.2, 1.2)    | 0.7 (0.3, 1.2)                        | 0.8 (0.1, 1.6)    | 0.8 (0.3, 1.3)    | 0.7 (0.3, 1.0)    | 0.6 (0.2, 1.0)    |
| <b>Burkina Faso</b>    |                                       |                   |                   |                   |                   |                                       |                   |                   |                   |                   |
| rural                  | 16.7 (15.3, 18.2)                     | 14.6 (13.2, 16.1) | 15.1 (13.6, 16.5) | 18.5 (17.1, 19.9) | 20.0 (18.6, 21.5) | 17.8 (16.5, 19.0)                     | 15.7 (14.4, 17.0) | 16.1 (14.9, 17.4) | 19.5 (18.3, 20.7) | 21.1 (19.8, 22.3) |
| urban                  | 18.0 (16.6, 19.5)                     | 15.7 (14.1, 17.3) | 16.3 (14.8, 17.8) | 19.9 (18.5, 21.3) | 21.6 (20.2, 23.1) | 18.8 (17.6, 20.1)                     | 16.5 (15.0, 18.0) | 17.1 (15.8, 18.4) | 20.7 (19.5, 21.9) | 22.4 (21.2, 23.7) |
| urban-rural difference | 1.3 (0.8, 1.9)                        | 1.1 (0.2, 1.9)    | 1.2 (0.6, 1.9)    | 1.4 (0.9, 2.0)    | 1.6 (1.0, 2.2)    | 1.1 (0.6, 1.6)                        | 0.8 (0.0, 1.6)    | 1.0 (0.4, 1.6)    | 1.2 (0.7, 1.7)    | 1.3 (0.8, 1.9)    |
| <b>Cabo Verde</b>      |                                       |                   |                   |                   |                   |                                       |                   |                   |                   |                   |
| rural                  | 17.0 (15.3, 18.7)                     | 14.2 (12.1, 16.4) | 15.4 (13.6, 17.1) | 19.0 (17.3, 20.7) | 20.4 (18.5, 22.4) | 17.9 (16.6, 19.2)                     | 15.1 (13.3, 17.0) | 16.3 (14.8, 17.7) | 19.9 (18.6, 21.1) | 21.3 (20.0, 22.7) |
| urban                  | 17.8 (16.1, 19.5)                     | 15.2 (13.1, 17.3) | 16.2 (14.4, 18.0) | 19.7 (18.0, 21.4) | 21.1 (19.1, 23.0) | 18.4 (17.2, 19.7)                     | 15.8 (14.0, 17.7) | 16.9 (15.4, 18.3) | 20.3 (19.1, 21.5) | 21.7 (20.4, 23.0) |
| urban-rural difference | 0.8 (0.1, 1.5)                        | 1.0 (0.1, 1.8)    | 0.8 (0.2, 1.5)    | 0.7 (0.0, 1.4)    | 0.6 (-0.3, 1.5)   | 0.5 (-0.1, 1.1)                       | 0.7 (-0.1, 1.5)   | 0.6 (-0.1, 1.2)   | 0.4 (-0.2, 1.1)   | 0.3 (-0.5, 1.2)   |
| <b>Cameroon</b>        |                                       |                   |                   |                   |                   |                                       |                   |                   |                   |                   |

| Girls                        | Mean BMI in 1990 (kg/m <sup>2</sup> ) |                   |                   |                   |                   | Mean BMI in 2020 (kg/m <sup>2</sup> ) |                   |                   |                   |                   |
|------------------------------|---------------------------------------|-------------------|-------------------|-------------------|-------------------|---------------------------------------|-------------------|-------------------|-------------------|-------------------|
|                              | Age-standardised                      | 5 years           | 10 years          | 15 years          | 19 years          | Age-standardised                      | 5 years           | 10 years          | 15 years          | 19 years          |
| rural                        | 18.0 (16.7, 19.4)                     | 15.3 (13.4, 17.1) | 16.4 (15.0, 17.8) | 20.0 (18.7, 21.4) | 21.6 (20.3, 23.0) | 19.0 (18.3, 19.8)                     | 16.3 (14.8, 17.9) | 17.4 (16.5, 18.2) | 21.0 (20.4, 21.7) | 22.6 (22.0, 23.3) |
| urban                        | 19.0 (17.6, 20.4)                     | 16.2 (14.3, 18.1) | 17.3 (15.9, 18.8) | 21.0 (19.7, 22.4) | 22.6 (21.3, 24.0) | 19.9 (19.2, 20.7)                     | 17.1 (15.6, 18.6) | 18.2 (17.4, 19.1) | 21.9 (21.3, 22.6) | 23.6 (23.0, 24.2) |
| urban-rural difference       | 1.0 (0.4, 1.5)                        | 0.9 (0.1, 1.7)    | 1.0 (0.4, 1.5)    | 1.0 (0.5, 1.5)    | 1.0 (0.4, 1.6)    | 0.9 (0.5, 1.3)                        | 0.8 (0.1, 1.6)    | 0.9 (0.4, 1.4)    | 0.9 (0.5, 1.3)    | 0.9 (0.5, 1.4)    |
| <b>Chad</b>                  |                                       |                   |                   |                   |                   |                                       |                   |                   |                   |                   |
| rural                        | 16.9 (15.3, 18.4)                     | 14.2 (12.1, 16.2) | 15.4 (13.7, 17.0) | 18.9 (17.4, 20.4) | 20.0 (18.4, 21.6) | 17.8 (16.8, 18.8)                     | 15.0 (13.4, 16.7) | 16.3 (15.1, 17.4) | 19.7 (18.8, 20.6) | 20.8 (19.9, 21.8) |
| urban                        | 17.7 (16.1, 19.2)                     | 15.1 (13.0, 17.2) | 16.2 (14.6, 17.8) | 19.6 (18.1, 21.1) | 20.6 (19.0, 22.2) | 18.4 (17.3, 19.4)                     | 15.8 (14.1, 17.5) | 16.9 (15.8, 18.1) | 20.3 (19.3, 21.2) | 21.3 (20.3, 22.3) |
| urban-rural difference       | 0.8 (0.2, 1.4)                        | 0.9 (0.1, 1.7)    | 0.8 (0.2, 1.5)    | 0.7 (0.1, 1.4)    | 0.6 (-0.1, 1.4)   | 0.6 (0.1, 1.1)                        | 0.7 (0.0, 1.5)    | 0.6 (0.1, 1.2)    | 0.5 (0.1, 1.0)    | 0.4 (-0.1, 1.0)   |
| <b>Côte d'Ivoire</b>         |                                       |                   |                   |                   |                   |                                       |                   |                   |                   |                   |
| rural                        | 17.9 (16.5, 19.2)                     | 15.1 (13.2, 16.9) | 16.3 (14.9, 17.7) | 19.9 (18.6, 21.2) | 21.0 (19.6, 22.3) | 18.5 (17.3, 19.7)                     | 15.7 (13.9, 17.5) | 16.9 (15.6, 18.2) | 20.5 (19.4, 21.7) | 21.6 (20.4, 22.8) |
| urban                        | 18.7 (17.4, 20.1)                     | 16.1 (14.2, 17.9) | 17.2 (15.8, 18.6) | 20.7 (19.4, 22.0) | 21.7 (20.3, 23.0) | 19.1 (17.9, 20.3)                     | 16.5 (14.7, 18.2) | 17.6 (16.3, 18.9) | 21.1 (20.0, 22.3) | 22.1 (20.9, 23.2) |
| urban-rural difference       | 0.8 (0.3, 1.4)                        | 1.0 (0.2, 1.8)    | 0.9 (0.3, 1.5)    | 0.8 (0.3, 1.3)    | 0.7 (0.1, 1.3)    | 0.6 (0.1, 1.2)                        | 0.8 (0.0, 1.6)    | 0.7 (0.1, 1.3)    | 0.6 (0.1, 1.1)    | 0.5 (-0.1, 1.1)   |
| <b>Gambia</b>                |                                       |                   |                   |                   |                   |                                       |                   |                   |                   |                   |
| rural                        | 16.8 (15.3, 18.3)                     | 14.1 (12.1, 16.1) | 15.2 (13.7, 16.8) | 18.7 (17.3, 20.2) | 20.1 (18.6, 21.6) | 17.6 (16.9, 18.2)                     | 14.9 (13.4, 16.3) | 16.0 (15.2, 16.8) | 19.5 (19.0, 20.0) | 20.9 (20.3, 21.5) |
| urban                        | 17.6 (16.1, 19.2)                     | 15.0 (13.0, 17.0) | 16.1 (14.6, 17.7) | 19.5 (18.1, 21.1) | 20.9 (19.3, 22.5) | 18.2 (17.5, 18.9)                     | 15.6 (14.1, 17.1) | 16.7 (15.8, 17.5) | 20.1 (19.6, 20.6) | 21.5 (20.8, 22.1) |
| urban-rural difference       | 0.8 (0.2, 1.4)                        | 0.9 (0.1, 1.7)    | 0.9 (0.2, 1.5)    | 0.8 (0.2, 1.4)    | 0.8 (0.0, 1.5)    | 0.7 (0.2, 1.1)                        | 0.7 (0.0, 1.5)    | 0.7 (0.2, 1.2)    | 0.6 (0.2, 1.0)    | 0.6 (0.1, 1.1)    |
| <b>Ghana</b>                 |                                       |                   |                   |                   |                   |                                       |                   |                   |                   |                   |
| rural                        | 17.4 (16.0, 18.7)                     | 14.4 (12.9, 15.8) | 15.8 (14.4, 17.2) | 19.4 (18.0, 20.8) | 21.0 (19.6, 22.4) | 18.6 (18.1, 19.2)                     | 15.6 (14.9, 16.4) | 17.0 (16.4, 17.6) | 20.6 (20.1, 21.2) | 22.2 (21.6, 22.8) |
| urban                        | 18.4 (17.0, 19.8)                     | 15.6 (14.1, 17.1) | 16.9 (15.5, 18.3) | 20.3 (19.0, 21.7) | 21.8 (20.4, 23.2) | 19.3 (18.7, 19.8)                     | 16.5 (15.7, 17.2) | 17.8 (17.2, 18.4) | 21.2 (20.7, 21.8) | 22.7 (22.1, 23.3) |
| urban-rural difference       | 1.0 (0.5, 1.6)                        | 1.2 (0.5, 1.9)    | 1.1 (0.5, 1.7)    | 0.9 (0.5, 1.5)    | 0.8 (0.3, 1.4)    | 0.7 (0.3, 1.0)                        | 0.9 (0.3, 1.4)    | 0.7 (0.4, 1.1)    | 0.6 (0.3, 0.9)    | 0.5 (0.1, 0.9)    |
| <b>Guinea</b>                |                                       |                   |                   |                   |                   |                                       |                   |                   |                   |                   |
| rural                        | 17.4 (16.0, 18.9)                     | 14.4 (12.4, 16.5) | 15.5 (13.9, 17.2) | 19.2 (17.7, 20.8) | 20.7 (19.1, 22.3) | 18.6 (17.8, 19.4)                     | 15.4 (13.5, 17.2) | 16.5 (15.1, 17.8) | 20.2 (18.9, 21.4) | 21.7 (20.4, 22.9) |
| urban                        | 18.2 (16.8, 19.7)                     | 15.3 (13.3, 17.4) | 16.3 (14.8, 18.0) | 19.9 (18.4, 21.5) | 21.4 (19.8, 23.0) | 19.3 (18.5, 20.1)                     | 16.1 (14.2, 17.9) | 17.1 (15.7, 18.5) | 20.7 (19.5, 21.9) | 22.1 (20.8, 23.4) |
| urban-rural difference       | 0.8 (0.2, 1.3)                        | 0.9 (0.1, 1.7)    | 0.8 (0.2, 1.4)    | 0.7 (0.1, 1.3)    | 0.7 (0.0, 1.4)    | 0.6 (0.2, 1.1)                        | 0.7 (-0.1, 1.5)   | 0.6 (0.0, 1.2)    | 0.5 (0.0, 1.0)    | 0.5 (-0.1, 1.0)   |
| <b>Guinea Bissau</b>         |                                       |                   |                   |                   |                   |                                       |                   |                   |                   |                   |
| rural                        | 17.2 (15.7, 18.8)                     | 14.7 (12.8, 16.7) | 15.9 (14.4, 17.5) | 19.4 (18.0, 20.8) | 20.7 (19.3, 22.2) | 18.1 (16.8, 19.4)                     | 15.9 (14.4, 17.5) | 17.1 (16.2, 18.0) | 20.6 (19.9, 21.2) | 21.9 (21.1, 22.6) |
| urban                        | 18.0 (16.4, 19.5)                     | 15.5 (13.6, 17.6) | 16.7 (15.2, 18.3) | 20.1 (18.7, 21.6) | 21.4 (20.0, 22.9) | 18.7 (17.4, 20.0)                     | 16.6 (15.1, 18.2) | 17.8 (16.8, 18.7) | 21.2 (20.5, 21.9) | 22.5 (21.7, 23.2) |
| urban-rural difference       | 0.8 (0.2, 1.4)                        | 0.8 (0.0, 1.6)    | 0.8 (0.2, 1.4)    | 0.8 (0.2, 1.3)    | 0.7 (0.1, 1.4)    | 0.6 (0.1, 1.1)                        | 0.7 (-0.1, 1.4)   | 0.6 (0.1, 1.2)    | 0.6 (0.2, 1.0)    | 0.6 (0.1, 1.1)    |
| <b>Liberia</b>               |                                       |                   |                   |                   |                   |                                       |                   |                   |                   |                   |
| rural                        | 17.3 (15.8, 18.7)                     | 14.5 (12.5, 16.5) | 15.7 (14.1, 17.2) | 19.3 (17.8, 20.7) | 20.7 (19.3, 22.2) | 18.5 (17.7, 19.2)                     | 15.7 (14.1, 17.2) | 16.9 (16.0, 17.8) | 20.5 (19.9, 21.1) | 21.9 (21.2, 22.5) |
| urban                        | 18.0 (16.6, 19.5)                     | 15.4 (13.4, 17.4) | 16.5 (14.9, 18.0) | 20.0 (18.5, 21.4) | 21.3 (19.8, 22.8) | 19.0 (18.3, 19.8)                     | 16.4 (14.9, 17.9) | 17.5 (16.6, 18.4) | 21.0 (20.3, 21.6) | 22.3 (21.6, 22.9) |
| urban-rural difference       | 0.8 (0.2, 1.4)                        | 0.9 (0.2, 1.7)    | 0.8 (0.2, 1.4)    | 0.7 (0.1, 1.3)    | 0.6 (-0.1, 1.3)   | 0.6 (0.1, 1.0)                        | 0.7 (0.0, 1.5)    | 0.6 (0.1, 1.1)    | 0.5 (0.1, 0.9)    | 0.4 (0.0, 0.8)    |
| <b>Mali</b>                  |                                       |                   |                   |                   |                   |                                       |                   |                   |                   |                   |
| rural                        | 17.0 (15.7, 18.3)                     | 14.3 (12.4, 16.2) | 15.4 (14.0, 16.8) | 19.0 (17.7, 20.2) | 20.4 (19.1, 21.7) | 18.3 (17.6, 19.1)                     | 15.6 (14.1, 17.2) | 16.7 (15.9, 17.6) | 20.3 (19.6, 20.9) | 21.7 (21.0, 22.4) |
| urban                        | 18.0 (16.6, 19.3)                     | 15.3 (13.4, 17.2) | 16.4 (14.9, 17.8) | 19.9 (18.6, 21.2) | 21.3 (20.0, 22.6) | 19.0 (18.2, 19.8)                     | 16.3 (14.7, 17.9) | 17.4 (16.5, 18.3) | 21.0 (20.3, 21.6) | 22.4 (21.6, 23.1) |
| urban-rural difference       | 0.9 (0.4, 1.5)                        | 1.0 (0.2, 1.8)    | 1.0 (0.4, 1.5)    | 0.9 (0.4, 1.4)    | 0.9 (0.4, 1.5)    | 0.7 (0.2, 1.1)                        | 0.7 (-0.1, 1.4)   | 0.7 (0.2, 1.2)    | 0.7 (0.3, 1.1)    | 0.7 (0.2, 1.1)    |
| <b>Mauritania</b>            |                                       |                   |                   |                   |                   |                                       |                   |                   |                   |                   |
| rural                        | 17.9 (16.4, 19.5)                     | 15.1 (13.1, 17.2) | 16.1 (14.5, 17.8) | 19.9 (18.4, 21.4) | 21.9 (20.3, 23.5) | 19.1 (18.4, 19.9)                     | 16.4 (14.8, 17.9) | 17.4 (16.4, 18.3) | 21.1 (20.5, 21.8) | 23.1 (22.3, 23.9) |
| urban                        | 18.9 (17.3, 20.4)                     | 16.0 (14.0, 18.1) | 17.1 (15.4, 18.7) | 20.9 (19.3, 22.4) | 22.9 (21.3, 24.5) | 20.1 (19.3, 20.9)                     | 17.3 (15.7, 18.9) | 18.3 (17.3, 19.3) | 22.1 (21.4, 22.9) | 24.2 (23.3, 25.0) |
| urban-rural difference       | 1.0 (0.3, 1.6)                        | 0.9 (0.1, 1.7)    | 0.9 (0.2, 1.6)    | 1.0 (0.3, 1.6)    | 1.0 (0.2, 1.8)    | 1.0 (0.5, 1.5)                        | 0.9 (0.1, 1.8)    | 1.0 (0.4, 1.5)    | 1.0 (0.5, 1.5)    | 1.0 (0.4, 1.7)    |
| <b>Niger</b>                 |                                       |                   |                   |                   |                   |                                       |                   |                   |                   |                   |
| rural                        | 16.4 (14.9, 17.9)                     | 13.7 (11.7, 15.7) | 14.6 (13.1, 16.2) | 18.3 (16.8, 19.8) | 20.6 (19.0, 22.1) | 17.4 (16.2, 18.6)                     | 14.6 (12.8, 16.4) | 15.6 (14.3, 16.9) | 19.3 (18.1, 20.4) | 21.5 (20.3, 22.7) |
| urban                        | 17.2 (15.7, 18.7)                     | 14.6 (12.6, 16.6) | 15.5 (13.9, 17.1) | 19.1 (17.6, 20.6) | 21.2 (19.7, 22.8) | 18.0 (16.8, 19.2)                     | 15.4 (13.6, 17.2) | 16.2 (15.0, 17.6) | 19.8 (18.7, 21.0) | 22.0 (20.7, 23.2) |
| urban-rural difference       | 0.8 (0.2, 1.4)                        | 0.9 (0.1, 1.8)    | 0.8 (0.2, 1.5)    | 0.7 (0.2, 1.3)    | 0.7 (0.0, 1.3)    | 0.6 (0.1, 1.1)                        | 0.8 (0.0, 1.5)    | 0.7 (0.1, 1.2)    | 0.6 (0.1, 1.0)    | 0.5 (-0.1, 1.0)   |
| <b>Nigeria</b>               |                                       |                   |                   |                   |                   |                                       |                   |                   |                   |                   |
| rural                        | 17.0 (15.5, 18.4)                     | 14.1 (12.7, 15.6) | 15.3 (13.9, 16.8) | 19.0 (17.6, 20.4) | 20.4 (19.0, 21.9) | 17.6 (16.9, 18.4)                     | 14.8 (14.0, 15.6) | 16.0 (15.2, 16.8) | 19.6 (18.9, 20.4) | 21.1 (20.3, 21.8) |
| urban                        | 17.4 (16.0, 18.8)                     | 14.7 (13.2, 16.1) | 15.8 (14.3, 17.2) | 19.4 (18.0, 20.8) | 20.8 (19.3, 22.3) | 18.0 (17.2, 18.8)                     | 15.3 (14.3, 16.2) | 16.4 (15.5, 17.2) | 20.0 (19.2, 20.8) | 21.4 (20.6, 22.2) |
| urban-rural difference       | 0.4 (-0.1, 1.0)                       | 0.5 (-0.2, 1.2)   | 0.5 (-0.1, 1.0)   | 0.4 (-0.1, 0.9)   | 0.4 (-0.2, 0.9)   | 0.4 (-0.1, 0.8)                       | 0.4 (-0.2, 1.1)   | 0.4 (-0.1, 0.9)   | 0.3 (-0.1, 0.7)   | 0.3 (-0.1, 0.7)   |
| <b>Sao Tome and Principe</b> |                                       |                   |                   |                   |                   |                                       |                   |                   |                   |                   |
| rural                        | 17.7 (16.1, 19.2)                     | 14.7 (12.7, 16.8) | 16.0 (14.4, 17.7) | 19.8 (18.3, 21.3) | 21.1 (19.4, 22.8) | 18.5 (17.4, 19.5)                     | 15.5 (13.8, 17.2) | 16.9 (15.6, 18.1) | 20.6 (19.6, 21.5) | 21.9 (21.0, 22.8) |
| urban                        | 18.2 (16.6, 19.8)                     | 15.7 (13.7, 17.8) | 16.7 (15.1, 18.4) | 20.1 (18.6, 21.7) | 21.2 (19.6, 22.8) | 18.7 (17.7, 19.6)                     | 16.2 (14.5, 17.8) | 17.2 (16.0, 18.3) | 20.6 (19.7, 21.5) | 21.7 (20.8, 22.5) |
| urban-rural difference       | 0.6 (-0.1, 1.2)                       | 1.0 (0.1, 1.8)    | 0.7 (0.0, 1.4)    | 0.4 (-0.3, 1.1)   | 0.1 (-0.6, 0.9)   | 0.2 (-0.4, 0.7)                       | 0.6 (-0.2, 1.4)   | 0.3 (-0.3, 0.9)   | 0.0 (-0.6, 0.5)   | -0.2 (-0.9, 0.4)  |

| Girls                  | Mean BMI in 1990 (kg/m <sup>2</sup> ) |                   |                   |                   |                   | Mean BMI in 2020 (kg/m <sup>2</sup> ) |                   |                   |                   |                   |
|------------------------|---------------------------------------|-------------------|-------------------|-------------------|-------------------|---------------------------------------|-------------------|-------------------|-------------------|-------------------|
|                        | Age-standardised                      | 5 years           | 10 years          | 15 years          | 19 years          | Age-standardised                      | 5 years           | 10 years          | 15 years          | 19 years          |
| Senegal                |                                       |                   |                   |                   |                   |                                       |                   |                   |                   |                   |
| rural                  | 16.5 (15.0, 18.0)                     | 13.8 (11.9, 15.9) | 14.9 (13.4, 16.5) | 18.4 (16.9, 19.9) | 19.8 (18.2, 21.3) | 17.2 (16.0, 18.4)                     | 14.5 (12.8, 16.3) | 15.6 (14.3, 17.0) | 19.1 (17.9, 20.3) | 20.5 (19.3, 21.7) |
| urban                  | 17.2 (15.7, 18.8)                     | 14.7 (12.6, 16.7) | 15.7 (14.1, 17.3) | 19.1 (17.6, 20.6) | 20.5 (18.9, 22.0) | 17.8 (16.6, 19.1)                     | 15.3 (13.5, 17.1) | 16.3 (15.0, 17.6) | 19.7 (18.6, 20.9) | 21.1 (19.8, 22.3) |
| urban-rural difference | 0.8 (0.2, 1.4)                        | 0.8 (0.0, 1.7)    | 0.8 (0.2, 1.4)    | 0.8 (0.2, 1.3)    | 0.7 (0.1, 1.3)    | 0.7 (0.2, 1.2)                        | 0.7 (0.0, 1.5)    | 0.7 (0.1, 1.3)    | 0.6 (0.2, 1.1)    | 0.6 (0.1, 1.2)    |
| Sierra Leone           |                                       |                   |                   |                   |                   |                                       |                   |                   |                   |                   |
| rural                  | 17.8 (16.2, 19.3)                     | 15.0 (13.0, 17.0) | 16.2 (14.6, 17.8) | 19.8 (18.3, 21.3) | 21.2 (19.7, 22.7) | 18.5 (17.7, 19.2)                     | 15.7 (14.2, 17.3) | 16.9 (16.0, 17.8) | 20.5 (19.9, 21.1) | 21.9 (21.2, 22.5) |
| urban                  | 18.6 (17.1, 20.1)                     | 15.9 (13.9, 17.9) | 17.0 (15.4, 18.6) | 20.6 (19.1, 22.0) | 21.9 (20.4, 23.5) | 19.1 (18.4, 19.9)                     | 16.4 (14.8, 18.0) | 17.5 (16.7, 18.5) | 21.1 (20.4, 21.7) | 22.4 (21.7, 23.1) |
| urban-rural difference | 0.8 (0.2, 1.4)                        | 0.9 (0.1, 1.7)    | 0.8 (0.2, 1.5)    | 0.8 (0.2, 1.4)    | 0.8 (0.1, 1.5)    | 0.6 (0.2, 1.1)                        | 0.7 (0.0, 1.5)    | 0.7 (0.2, 1.2)    | 0.6 (0.2, 1.0)    | 0.6 (0.1, 1.0)    |
| Togo                   |                                       |                   |                   |                   |                   |                                       |                   |                   |                   |                   |
| rural                  | 17.6 (16.1, 19.1)                     | 14.8 (12.9, 16.9) | 16.0 (14.4, 17.6) | 19.6 (18.1, 21.2) | 20.9 (19.4, 22.4) | 18.6 (17.5, 19.7)                     | 15.8 (14.1, 17.6) | 17.0 (15.8, 18.2) | 20.6 (19.6, 21.6) | 21.9 (20.8, 22.9) |
| urban                  | 18.5 (17.0, 20.1)                     | 15.7 (13.7, 17.8) | 16.9 (15.3, 18.5) | 20.5 (19.0, 22.1) | 21.8 (20.2, 23.4) | 19.4 (18.3, 20.5)                     | 16.6 (14.8, 18.4) | 17.8 (16.5, 19.0) | 21.4 (20.4, 22.5) | 22.7 (21.6, 23.8) |
| urban-rural difference | 0.9 (0.3, 1.6)                        | 0.9 (0.1, 1.7)    | 0.9 (0.3, 1.6)    | 0.9 (0.3, 1.6)    | 1.0 (0.2, 1.7)    | 0.8 (0.3, 1.3)                        | 0.8 (0.0, 1.6)    | 0.8 (0.3, 1.4)    | 0.8 (0.3, 1.3)    | 0.8 (0.3, 1.4)    |

| Boys                              | Mean BMI in 1990 (kg/m <sup>2</sup> ) |                   |                   |                   |                   | Mean BMI in 2020 (kg/m <sup>2</sup> ) |                   |                   |                   |                   |
|-----------------------------------|---------------------------------------|-------------------|-------------------|-------------------|-------------------|---------------------------------------|-------------------|-------------------|-------------------|-------------------|
|                                   | Age-standardised                      | 5 years           | 10 years          | 15 years          | 19 years          | Age-standardised                      | 5 years           | 10 years          | 15 years          | 19 years          |
| <b>Central and eastern Europe</b> |                                       |                   |                   |                   |                   |                                       |                   |                   |                   |                   |
| <i>Central Europe</i>             |                                       |                   |                   |                   |                   |                                       |                   |                   |                   |                   |
| Albania                           |                                       |                   |                   |                   |                   |                                       |                   |                   |                   |                   |
| rural                             | 18.3 (17.0, 19.7)                     | 15.0 (13.6, 16.4) | 17.0 (15.6, 18.4) | 20.1 (18.8, 21.5) | 22.3 (20.9, 23.7) | 18.8 (18.2, 19.5)                     | 15.5 (14.7, 16.2) | 17.5 (16.9, 18.1) | 20.6 (20.0, 21.3) | 22.8 (22.0, 23.5) |
| urban                             | 19.1 (17.8, 20.5)                     | 16.0 (14.7, 17.4) | 17.8 (16.5, 19.2) | 20.7 (19.4, 22.1) | 22.7 (21.4, 24.1) | 19.4 (18.7, 20.0)                     | 16.3 (15.6, 17.0) | 18.1 (17.4, 18.8) | 21.0 (20.3, 21.7) | 23.0 (22.2, 23.8) |
| urban-rural difference            | 0.8 (0.1, 1.3)                        | 1.1 (0.3, 1.7)    | 0.8 (0.2, 1.4)    | 0.6 (0.0, 1.2)    | 0.4 (-0.3, 1.1)   | 0.5 (0.2, 0.9)                        | 0.8 (0.3, 1.3)    | 0.6 (0.2, 1.0)    | 0.4 (0.0, 0.8)    | 0.2 (-0.2, 0.7)   |
| Bosnia and Herzegovina            |                                       |                   |                   |                   |                   |                                       |                   |                   |                   |                   |
| rural                             | 18.6 (16.8, 20.5)                     | 15.1 (12.2, 18.1) | 17.5 (15.6, 19.4) | 20.3 (18.6, 22.1) | 22.1 (20.3, 23.9) | 19.6 (18.0, 21.3)                     | 16.2 (13.3, 19.0) | 18.5 (16.8, 20.2) | 21.4 (19.8, 23.0) | 23.1 (21.5, 24.7) |
| urban                             | 19.0 (17.1, 20.8)                     | 15.6 (12.6, 18.5) | 17.9 (16.0, 19.7) | 20.7 (18.9, 22.4) | 22.4 (20.6, 24.2) | 19.7 (18.1, 21.3)                     | 16.3 (13.4, 19.1) | 18.6 (16.9, 20.3) | 21.4 (19.8, 23.0) | 23.1 (21.5, 24.7) |
| urban-rural difference            | 0.4 (-0.3, 1.0)                       | 0.4 (-0.5, 1.3)   | 0.4 (-0.3, 1.1)   | 0.4 (-0.3, 1.0)   | 0.3 (-0.4, 1.0)   | 0.0 (-0.6, 0.7)                       | 0.1 (-0.8, 1.0)   | 0.1 (-0.6, 0.7)   | 0.0 (-0.6, 0.6)   | 0.0 (-0.7, 0.7)   |
| Bulgaria                          |                                       |                   |                   |                   |                   |                                       |                   |                   |                   |                   |
| rural                             | 18.5 (17.5, 19.6)                     | 15.1 (14.0, 16.3) | 17.6 (16.5, 18.7) | 20.2 (19.1, 21.3) | 21.5 (19.8, 23.1) | 19.6 (18.9, 20.2)                     | 16.2 (15.4, 16.9) | 18.6 (17.9, 19.3) | 21.2 (20.4, 22.0) | 22.5 (21.0, 24.1) |
| urban                             | 18.8 (17.9, 19.8)                     | 15.6 (14.5, 16.6) | 17.9 (16.9, 18.8) | 20.4 (19.5, 21.4) | 21.7 (20.2, 23.2) | 19.5 (18.8, 20.1)                     | 16.2 (15.5, 16.9) | 18.5 (17.9, 19.2) | 21.1 (20.3, 21.8) | 22.4 (21.0, 23.7) |
| urban-rural difference            | 0.3 (-0.2, 0.9)                       | 0.4 (-0.2, 1.1)   | 0.3 (-0.2, 0.9)   | 0.3 (-0.3, 0.9)   | 0.2 (-0.5, 0.9)   | -0.1 (-0.5, 0.3)                      | 0.0 (-0.5, 0.5)   | -0.1 (-0.5, 0.3)  | -0.1 (-0.6, 0.4)  | -0.2 (-0.8, 0.5)  |
| Croatia                           |                                       |                   |                   |                   |                   |                                       |                   |                   |                   |                   |
| rural                             | 18.7 (17.4, 20.0)                     | 15.4 (14.1, 16.7) | 17.7 (16.4, 19.0) | 20.5 (19.2, 21.8) | 21.6 (20.2, 23.0) | 19.7 (19.2, 20.3)                     | 16.4 (15.8, 17.0) | 18.7 (18.1, 19.2) | 21.5 (20.9, 22.1) | 22.6 (21.8, 23.4) |
| urban                             | 19.1 (17.8, 20.4)                     | 15.6 (14.3, 16.9) | 18.0 (16.7, 19.3) | 20.9 (19.6, 22.3) | 22.1 (20.7, 23.5) | 19.7 (19.1, 20.2)                     | 16.2 (15.6, 16.8) | 18.5 (18.0, 19.1) | 21.5 (20.9, 22.1) | 22.6 (21.8, 23.4) |
| urban-rural difference            | 0.3 (-0.2, 0.8)                       | 0.2 (-0.4, 0.8)   | 0.3 (-0.2, 0.8)   | 0.4 (-0.1, 0.9)   | 0.5 (-0.1, 1.1)   | -0.1 (-0.5, 0.3)                      | -0.2 (-0.6, 0.2)  | -0.1 (-0.5, 0.2)  | 0.0 (-0.4, 0.4)   | 0.0 (-0.5, 0.5)   |
| Czechia                           |                                       |                   |                   |                   |                   |                                       |                   |                   |                   |                   |
| rural                             | 18.4 (17.1, 19.6)                     | 15.2 (13.8, 16.5) | 17.3 (16.0, 18.6) | 20.0 (18.6, 21.3) | 21.7 (20.0, 23.3) | 19.0 (18.3, 19.6)                     | 15.8 (15.2, 16.4) | 17.9 (17.3, 18.5) | 20.6 (19.8, 21.4) | 22.4 (21.1, 23.6) |
| urban                             | 18.6 (17.3, 19.8)                     | 15.3 (14.1, 16.6) | 17.5 (16.3, 18.7) | 20.2 (18.9, 21.5) | 22.0 (20.3, 23.5) | 18.8 (18.2, 19.4)                     | 15.6 (15.0, 16.1) | 17.7 (17.1, 18.3) | 20.4 (19.7, 21.1) | 22.2 (21.0, 23.4) |
| urban-rural difference            | 0.2 (-0.3, 0.7)                       | 0.2 (-0.4, 0.8)   | 0.2 (-0.3, 0.7)   | 0.2 (-0.4, 0.8)   | 0.2 (-0.5, 1.0)   | -0.2 (-0.6, 0.2)                      | -0.2 (-0.7, 0.2)  | -0.2 (-0.6, 0.2)  | -0.2 (-0.7, 0.3)  | -0.2 (-0.9, 0.5)  |
| Hungary                           |                                       |                   |                   |                   |                   |                                       |                   |                   |                   |                   |
| rural                             | 18.7 (17.3, 20.1)                     | 14.8 (13.2, 16.2) | 17.9 (16.5, 19.2) | 20.5 (19.1, 21.8) | 21.8 (20.3, 23.2) | 20.4 (20.0, 20.8)                     | 16.5 (15.9, 17.1) | 19.6 (19.2, 20.0) | 22.2 (21.8, 22.6) | 23.5 (22.9, 24.0) |
| urban                             | 19.1 (17.7, 20.4)                     | 15.0 (13.6, 16.4) | 18.2 (16.8, 19.6) | 20.9 (19.5, 22.3) | 22.3 (20.8, 23.6) | 20.4 (20.0, 20.7)                     | 16.3 (15.8, 16.9) | 19.5 (19.2, 19.9) | 22.2 (21.9, 22.6) | 23.5 (23.1, 24.0) |
| urban-rural difference            | 0.4 (-0.2, 0.9)                       | 0.3 (-0.4, 0.9)   | 0.3 (-0.2, 0.9)   | 0.4 (-0.1, 1.0)   | 0.5 (-0.1, 1.1)   | -0.1 (-0.3, 0.2)                      | -0.2 (-0.6, 0.3)  | -0.1 (-0.4, 0.2)  | 0.0 (-0.3, 0.3)   | 0.0 (-0.4, 0.5)   |
| North Macedonia                   |                                       |                   |                   |                   |                   |                                       |                   |                   |                   |                   |
| rural                             | 18.4 (17.0, 19.8)                     | 15.0 (13.4, 16.5) | 17.2 (15.8, 18.6) | 20.1 (18.6, 21.7) | 21.9 (19.8, 24.1) | 19.4 (18.6, 20.2)                     | 16.0 (15.1, 16.9) | 18.2 (17.5, 19.0) | 21.1 (20.1, 22.2) | 22.9 (21.1, 24.7) |
| urban                             | 19.0 (17.6, 20.4)                     | 15.7 (14.3, 17.2) | 17.9 (16.5, 19.3) | 20.6 (19.0, 22.2) | 22.3 (20.1, 24.4) | 19.7 (18.9, 20.5)                     | 16.4 (15.5, 17.3) | 18.6 (17.8, 19.3) | 21.3 (20.2, 22.4) | 23.0 (21.1, 24.8) |
| urban-rural difference            | 0.6 (0.0, 1.1)                        | 0.8 (0.1, 1.4)    | 0.6 (0.0, 1.2)    | 0.5 (-0.1, 1.1)   | 0.4 (-0.4, 1.1)   | 0.3 (-0.2, 0.7)                       | 0.5 (0.0, 0.9)    | 0.3 (-0.1, 0.7)   | 0.2 (-0.3, 0.7)   | 0.1 (-0.6, 0.7)   |
| Montenegro                        |                                       |                   |                   |                   |                   |                                       |                   |                   |                   |                   |
| rural                             | 18.5 (17.8, 19.2)                     | 14.8 (13.9, 15.7) | 17.3 (16.6, 18.1) | 20.3 (19.7, 21.0) | 22.1 (21.5, 22.7) | 19.6 (19.2, 20.0)                     | 15.9 (15.3, 16.4) | 18.4 (17.9, 18.8) | 21.4 (20.9, 21.9) | 23.2 (22.5, 23.9) |
| urban                             | 19.0 (18.3, 19.7)                     | 15.5 (14.6, 16.4) | 17.9 (17.1, 18.7) | 20.8 (20.1, 21.5) | 22.5 (21.8, 23.1) | 19.8 (19.4, 20.2)                     | 16.3 (15.7, 16.8) | 18.7 (18.3, 19.1) | 21.6 (21.1, 22.0) | 23.2 (22.6, 23.9) |
| urban-rural difference            | 0.5 (-0.1, 1.1)                       | 0.7 (0.0, 1.4)    | 0.6 (0.0, 1.2)    | 0.4 (-0.2, 1.1)   | 0.3 (-0.4, 1.0)   | 0.2 (-0.1, 0.6)                       | 0.4 (0.0, 0.8)    | 0.3 (0.0, 0.6)    | 0.1 (-0.3, 0.6)   | 0.0 (-0.5, 0.6)   |
| Poland                            |                                       |                   |                   |                   |                   |                                       |                   |                   |                   |                   |
| rural                             | 18.6 (17.6, 19.5)                     | 15.2 (14.2, 16.2) | 17.4 (16.5, 18.4) | 20.3 (19.3, 21.2) | 21.9 (21.0, 22.9) | 19.4 (19.0, 19.9)                     | 16.0 (15.5, 16.6) | 18.3 (17.8, 18.8) | 21.2 (20.7, 21.6) | 22.8 (22.3, 23.3) |
| urban                             | 18.7 (17.7, 19.6)                     | 15.3 (14.3, 16.3) | 17.6 (16.6, 18.5) | 20.4 (19.5, 21.4) | 22.1 (21.1, 23.0) | 19.3 (18.8, 19.7)                     | 15.8 (15.4, 16.3) | 18.1 (17.7, 18.6) | 21.0 (20.5, 21.5) | 22.6 (22.1, 23.2) |
| urban-rural difference            | 0.1 (-0.3, 0.5)                       | 0.1 (-0.4, 0.6)   | 0.1 (-0.3, 0.6)   | 0.1 (-0.3, 0.6)   | 0.2 (-0.3, 0.6)   | -0.2 (-0.5, 0.1)                      | -0.2 (-0.6, 0.2)  | -0.2 (-0.5, 0.1)  | -0.2 (-0.5, 0.2)  | -0.2 (-0.5, 0.2)  |
| Romania                           |                                       |                   |                   |                   |                   |                                       |                   |                   |                   |                   |
| rural                             | 17.9 (16.8, 19.1)                     | 14.5 (13.4, 15.7) | 16.7 (15.6, 17.8) | 19.6 (18.4, 20.7) | 21.9 (20.7, 23.2) | 19.0 (18.5, 19.5)                     | 15.6 (15.0, 16.1) | 17.7 (17.2, 18.2) | 20.6 (20.1, 21.1) | 23.0 (22.2, 23.7) |
| urban                             | 18.5 (17.4, 19.6)                     | 15.4 (14.2, 16.5) | 17.3 (16.2, 18.5) | 20.0 (18.9, 21.2) | 22.2 (21.0, 23.5) | 19.2 (18.7, 19.7)                     | 16.1 (15.6, 16.6) | 18.0 (17.5, 18.5) | 20.7 (20.2, 21.3) | 22.9 (22.2, 23.6) |
| urban-rural difference            | 0.6 (0.1, 1.0)                        | 0.8 (0.3, 1.4)    | 0.6 (0.2, 1.1)    | 0.5 (0.0, 0.9)    | 0.3 (-0.2, 0.8)   | 0.2 (-0.1, 0.5)                       | 0.5 (0.2, 0.8)    | 0.3 (0.0, 0.6)    | 0.1 (-0.3, 0.5)   | 0.0 (-0.5, 0.4)   |
| Serbia                            |                                       |                   |                   |                   |                   |                                       |                   |                   |                   |                   |
| rural                             | 18.8 (17.6, 20.0)                     | 15.0 (13.7, 16.3) | 17.7 (16.4, 18.9) | 20.6 (19.4, 21.8) | 22.5 (21.2, 23.8) | 20.2 (19.6, 20.8)                     | 16.5 (15.7, 17.2) | 19.1 (18.5, 19.7) | 22.0 (21.4, 22.7) | 24.0 (23.2, 24.7) |
| urban                             | 19.0 (17.8, 20.2)                     | 15.3 (13.9, 16.6) | 17.9 (16.7, 19.1) | 20.8 (19.6, 22.0) | 22.7 (21.4, 23.9) | 20.0 (19.4, 20.6)                     | 16.3 (15.6, 17.0) | 18.9 (18.3, 19.5) | 21.8 (21.2, 22.4) | 23.7 (23.0, 24.4) |
| urban-rural difference            | 0.2 (-0.3, 0.7)                       | 0.2 (-0.4, 0.8)   | 0.2 (-0.3, 0.7)   | 0.2 (-0.3, 0.7)   | 0.1 (-0.4, 0.7)   | -0.2 (-0.6, 0.1)                      | -0.2 (-0.6, 0.3)  | -0.2 (-0.6, 0.2)  | -0.2 (-0.6, 0.2)  | -0.3 (-0.8, 0.2)  |
| Slovakia                          |                                       |                   |                   |                   |                   |                                       |                   |                   |                   |                   |
| rural                             | 18.7 (17.9, 19.6)                     | 15.5 (14.6, 16.5) | 17.5 (16.6, 18.4) | 20.4 (19.5, 21.3) | 22.6 (21.6, 23.6) | 19.7 (19.1, 20.3)                     | 16.5 (15.8, 17.2) | 18.5 (17.8, 19.1) | 21.3 (20.7, 22.0) | 23.6 (22.7, 24.4) |
| urban                             | 18.9 (18.1, 19.8)                     | 15.7 (14.8, 16.7) | 17.7 (16.9, 18.6) | 20.5 (19.7, 21.4) | 22.8 (21.8, 23.7) | 19.5 (18.8, 20.1)                     | 16.3 (15.6, 17.0) | 18.2 (17.6, 18.9) | 21.1 (20.4, 21.8) | 23.3 (22.5, 24.1) |
| urban-rural difference            | 0.2 (-0.3, 0.7)                       | 0.2 (-0.3, 0.7)   | 0.2 (-0.3, 0.7)   | 0.2 (-0.3, 0.7)   | 0.2 (-0.4, 0.7)   | -0.2 (-0.7, 0.2)                      | -0.2 (-0.7, 0.3)  | -0.2 (-0.6, 0.2)  | -0.2 (-0.7, 0.2)  | -0.3 (-0.8, 0.3)  |
| Slovenia                          |                                       |                   |                   |                   |                   |                                       |                   |                   |                   |                   |

| Boys                                              | Mean BMI in 1990 (kg/m <sup>2</sup> ) |                   |                   |                   |                   | Mean BMI in 2020 (kg/m <sup>2</sup> ) |                   |                   |                   |                   |
|---------------------------------------------------|---------------------------------------|-------------------|-------------------|-------------------|-------------------|---------------------------------------|-------------------|-------------------|-------------------|-------------------|
|                                                   | Age-standardised                      | 5 years           | 10 years          | 15 years          | 19 years          | Age-standardised                      | 5 years           | 10 years          | 15 years          | 19 years          |
| rural                                             | 18.9 (18.5, 19.2)                     | 15.0 (14.6, 15.4) | 17.7 (17.4, 18.0) | 20.8 (20.4, 21.1) | 22.5 (22.1, 22.8) | 20.0 (19.5, 20.4)                     | 16.1 (15.6, 16.6) | 18.8 (18.4, 19.3) | 21.9 (21.4, 22.3) | 23.6 (23.1, 24.1) |
| urban                                             | 19.2 (18.9, 19.5)                     | 15.4 (15.1, 15.8) | 18.1 (17.8, 18.4) | 21.0 (20.7, 21.4) | 22.6 (22.3, 23.0) | 19.8 (19.4, 20.3)                     | 16.1 (15.6, 16.6) | 18.7 (18.3, 19.2) | 21.7 (21.2, 22.1) | 23.3 (22.8, 23.8) |
| urban-rural difference                            | 0.3 (-0.1, 0.8)                       | 0.5 (-0.1, 1.0)   | 0.4 (-0.1, 0.8)   | 0.2 (-0.2, 0.7)   | 0.2 (-0.4, 0.7)   | -0.1 (-0.6, 0.3)                      | 0.0 (-0.5, 0.6)   | -0.1 (-0.5, 0.3)  | -0.2 (-0.6, 0.2)  | -0.3 (-0.8, 0.3)  |
| <b>Eastern Europe</b>                             |                                       |                   |                   |                   |                   |                                       |                   |                   |                   |                   |
| <b>Belarus</b>                                    |                                       |                   |                   |                   |                   |                                       |                   |                   |                   |                   |
| rural                                             | 18.7 (16.8, 20.7)                     | 15.8 (12.7, 18.9) | 17.5 (15.5, 19.5) | 20.3 (18.4, 22.1) | 22.5 (20.5, 24.5) | 19.5 (17.9, 21.1)                     | 16.5 (13.6, 19.5) | 18.2 (16.5, 20.0) | 21.0 (19.4, 22.6) | 23.2 (21.6, 24.9) |
| urban                                             | 18.8 (16.9, 20.7)                     | 15.9 (12.8, 19.0) | 17.6 (15.6, 19.5) | 20.3 (18.5, 22.2) | 22.6 (20.5, 24.7) | 19.5 (17.9, 21.2)                     | 16.6 (13.7, 19.5) | 18.3 (16.6, 20.0) | 21.1 (19.5, 22.6) | 23.3 (21.7, 24.9) |
| urban-rural difference                            | 0.1 (-0.7, 0.8)                       | 0.1 (-0.9, 1.0)   | 0.1 (-0.7, 0.8)   | 0.1 (-0.7, 0.7)   | 0.1 (-0.7, 0.8)   | 0.1 (-0.6, 0.7)                       | 0.1 (-0.8, 1.0)   | 0.1 (-0.6, 0.8)   | 0.1 (-0.6, 0.7)   | 0.1 (-0.7, 0.8)   |
| <b>Estonia</b>                                    |                                       |                   |                   |                   |                   |                                       |                   |                   |                   |                   |
| rural                                             | 19.0 (17.6, 20.3)                     | 15.5 (14.1, 16.9) | 18.0 (16.6, 19.3) | 20.7 (19.3, 22.1) | 22.2 (20.9, 23.5) | 19.8 (19.2, 20.4)                     | 16.3 (15.6, 17.0) | 18.7 (18.2, 19.3) | 21.5 (20.8, 22.2) | 23.0 (22.1, 23.8) |
| urban                                             | 18.9 (17.5, 20.1)                     | 15.2 (13.8, 16.6) | 17.8 (16.4, 19.1) | 20.7 (19.3, 22.0) | 22.2 (20.9, 23.6) | 19.7 (19.1, 20.3)                     | 16.1 (15.4, 16.7) | 18.6 (18.0, 19.2) | 21.5 (20.8, 22.1) | 23.1 (22.2, 23.9) |
| urban-rural difference                            | -0.1 (-0.7, 0.4)                      | -0.3 (-1.0, 0.4)  | -0.2 (-0.8, 0.4)  | -0.1 (-0.6, 0.5)  | 0.0 (-0.6, 0.6)   | -0.1 (-0.4, 0.3)                      | -0.2 (-0.7, 0.3)  | -0.1 (-0.5, 0.2)  | 0.0 (-0.4, 0.4)   | 0.1 (-0.4, 0.5)   |
| <b>Latvia</b>                                     |                                       |                   |                   |                   |                   |                                       |                   |                   |                   |                   |
| rural                                             | 18.4 (16.9, 19.8)                     | 15.5 (14.1, 17.0) | 17.2 (15.8, 18.6) | 19.9 (18.4, 21.4) | 22.0 (19.8, 24.2) | 19.1 (18.4, 19.8)                     | 16.2 (15.5, 16.9) | 17.9 (17.3, 18.5) | 20.6 (19.7, 21.5) | 22.7 (20.9, 24.5) |
| urban                                             | 18.5 (17.1, 20.0)                     | 15.7 (14.2, 17.2) | 17.3 (15.9, 18.7) | 20.1 (18.5, 21.6) | 22.1 (20.0, 24.3) | 19.2 (18.5, 19.9)                     | 16.4 (15.6, 17.1) | 18.0 (17.4, 18.6) | 20.7 (19.9, 21.6) | 22.8 (21.1, 24.6) |
| urban-rural difference                            | 0.1 (-0.4, 0.7)                       | 0.1 (-0.5, 0.8)   | 0.1 (-0.4, 0.7)   | 0.1 (-0.5, 0.8)   | 0.1 (-0.6, 0.9)   | 0.1 (-0.3, 0.5)                       | 0.1 (-0.3, 0.6)   | 0.1 (-0.3, 0.5)   | 0.1 (-0.4, 0.6)   | 0.1 (-0.6, 0.8)   |
| <b>Lithuania</b>                                  |                                       |                   |                   |                   |                   |                                       |                   |                   |                   |                   |
| rural                                             | 18.5 (17.1, 20.0)                     | 15.7 (14.1, 17.3) | 17.3 (15.8, 18.7) | 20.0 (18.6, 21.6) | 22.2 (20.2, 24.3) | 19.1 (18.4, 19.8)                     | 16.3 (15.5, 17.1) | 17.8 (17.2, 18.5) | 20.6 (19.8, 21.4) | 22.8 (21.1, 24.4) |
| urban                                             | 18.6 (17.2, 20.0)                     | 15.7 (14.2, 17.3) | 17.3 (15.9, 18.8) | 20.1 (18.6, 21.6) | 22.3 (20.2, 24.2) | 19.1 (18.4, 19.8)                     | 16.3 (15.5, 17.0) | 17.9 (17.2, 18.5) | 20.6 (19.8, 21.5) | 22.8 (21.2, 24.4) |
| urban-rural difference                            | 0.0 (-0.5, 0.6)                       | 0.0 (-0.6, 0.7)   | 0.0 (-0.5, 0.6)   | 0.1 (-0.6, 0.7)   | 0.1 (-0.6, 0.8)   | 0.0 (-0.4, 0.4)                       | 0.0 (-0.4, 0.4)   | 0.0 (-0.3, 0.4)   | 0.0 (-0.4, 0.5)   | 0.1 (-0.6, 0.7)   |
| <b>Moldova</b>                                    |                                       |                   |                   |                   |                   |                                       |                   |                   |                   |                   |
| rural                                             | 18.1 (16.5, 19.6)                     | 15.1 (13.3, 17.0) | 16.8 (15.2, 18.3) | 19.6 (18.0, 21.2) | 21.8 (20.1, 23.5) | 18.7 (17.6, 19.7)                     | 15.7 (14.3, 17.1) | 17.4 (16.3, 18.5) | 20.2 (19.0, 21.6) | 22.4 (21.1, 23.8) |
| urban                                             | 18.2 (16.7, 19.7)                     | 15.3 (13.6, 17.1) | 17.0 (15.4, 18.5) | 19.8 (18.2, 21.4) | 22.0 (20.3, 23.7) | 18.9 (17.8, 20.0)                     | 16.0 (14.5, 17.4) | 17.6 (16.5, 18.8) | 20.5 (19.2, 21.7) | 22.7 (21.4, 24.0) |
| urban-rural difference                            | 0.2 (-0.5, 0.8)                       | 0.2 (-0.6, 1.0)   | 0.2 (-0.5, 0.8)   | 0.2 (-0.5, 0.8)   | 0.2 (-0.6, 0.9)   | 0.2 (-0.3, 0.7)                       | 0.2 (-0.5, 0.9)   | 0.2 (-0.3, 0.7)   | 0.2 (-0.3, 0.8)   | 0.2 (-0.5, 0.9)   |
| <b>Russian Federation</b>                         |                                       |                   |                   |                   |                   |                                       |                   |                   |                   |                   |
| rural                                             | 19.2 (18.6, 19.8)                     | 17.1 (16.5, 17.7) | 17.9 (17.4, 18.5) | 20.5 (19.9, 21.1) | 22.6 (22.0, 23.2) | 19.2 (18.3, 20.0)                     | 17.0 (16.2, 17.9) | 17.9 (17.1, 18.7) | 20.5 (19.7, 21.3) | 22.5 (21.7, 23.4) |
| urban                                             | 19.0 (18.4, 19.6)                     | 16.7 (16.1, 17.3) | 17.7 (17.1, 18.3) | 20.4 (19.8, 21.0) | 22.5 (21.9, 23.1) | 19.1 (18.4, 19.8)                     | 16.8 (16.1, 17.5) | 17.8 (17.1, 18.5) | 20.5 (19.8, 21.2) | 22.6 (21.9, 23.4) |
| urban-rural difference                            | -0.2 (-0.5, 0.1)                      | -0.4 (-0.7, -0.1) | -0.3 (-0.6, 0.0)  | -0.1 (-0.4, 0.1)  | -0.1 (-0.4, 0.2)  | -0.1 (-0.5, 0.4)                      | -0.2 (-0.7, 0.3)  | -0.1 (-0.6, 0.4)  | 0.0 (-0.5, 0.5)   | 0.1 (-0.4, 0.6)   |
| <b>Ukraine</b>                                    |                                       |                   |                   |                   |                   |                                       |                   |                   |                   |                   |
| rural                                             | 18.2 (16.8, 19.6)                     | 15.3 (13.9, 16.8) | 17.0 (15.6, 18.5) | 19.6 (18.2, 21.1) | 22.0 (20.5, 23.7) | 18.7 (18.3, 19.2)                     | 15.9 (15.3, 16.5) | 17.6 (17.1, 18.1) | 20.1 (19.6, 20.6) | 22.6 (21.8, 23.4) |
| urban                                             | 18.3 (16.9, 19.7)                     | 15.6 (14.2, 17.1) | 17.2 (15.8, 18.6) | 19.6 (18.2, 21.1) | 22.0 (20.5, 23.6) | 18.9 (18.4, 19.4)                     | 16.2 (15.6, 16.8) | 17.8 (17.3, 18.3) | 20.2 (19.7, 20.7) | 22.6 (21.8, 23.4) |
| urban-rural difference                            | 0.1 (-0.5, 0.8)                       | 0.3 (-0.4, 1.0)   | 0.2 (-0.5, 0.8)   | 0.0 (-0.6, 0.7)   | 0.0 (-0.7, 0.6)   | 0.1 (-0.2, 0.5)                       | 0.3 (-0.2, 0.8)   | 0.2 (-0.2, 0.6)   | 0.1 (-0.3, 0.5)   | 0.0 (-0.5, 0.4)   |
| <b>Central Asia, Middle East and north Africa</b> |                                       |                   |                   |                   |                   |                                       |                   |                   |                   |                   |
| <b>Central Asia</b>                               |                                       |                   |                   |                   |                   |                                       |                   |                   |                   |                   |
| <b>Armenia</b>                                    |                                       |                   |                   |                   |                   |                                       |                   |                   |                   |                   |
| rural                                             | 17.3 (15.8, 18.8)                     | 14.4 (12.4, 16.5) | 16.1 (14.6, 17.7) | 19.1 (17.5, 20.7) | 19.8 (18.2, 21.4) | 18.9 (18.2, 19.7)                     | 16.1 (14.8, 17.3) | 17.8 (17.0, 18.6) | 20.7 (19.7, 21.9) | 21.5 (20.3, 22.7) |
| urban                                             | 18.0 (16.5, 19.5)                     | 15.0 (13.1, 17.1) | 16.8 (15.3, 18.4) | 19.8 (18.2, 21.4) | 20.5 (18.9, 22.2) | 19.6 (18.8, 20.3)                     | 16.7 (15.5, 17.9) | 18.4 (17.6, 19.2) | 21.4 (20.4, 22.5) | 22.1 (20.9, 23.3) |
| urban-rural difference                            | 0.7 (-0.1, 1.4)                       | 0.6 (-0.3, 1.6)   | 0.7 (-0.1, 1.4)   | 0.7 (0.0, 1.4)    | 0.7 (0.0, 1.5)    | 0.6 (0.1, 1.2)                        | 0.6 (-0.1, 1.3)   | 0.6 (0.1, 1.2)    | 0.7 (0.1, 1.2)    | 0.7 (0.0, 1.4)    |
| <b>Azerbaijan</b>                                 |                                       |                   |                   |                   |                   |                                       |                   |                   |                   |                   |
| rural                                             | 17.8 (16.1, 19.5)                     | 14.6 (11.7, 17.6) | 16.4 (14.7, 18.2) | 19.6 (17.9, 21.1) | 21.6 (19.9, 23.2) | 19.4 (18.0, 20.8)                     | 16.3 (13.4, 19.0) | 18.0 (16.5, 19.5) | 21.2 (19.9, 22.5) | 23.2 (21.9, 24.5) |
| urban                                             | 18.1 (16.4, 19.8)                     | 15.1 (12.1, 18.0) | 16.8 (15.0, 18.6) | 19.8 (18.2, 21.4) | 21.8 (20.1, 23.4) | 19.6 (18.3, 21.0)                     | 16.6 (13.7, 19.3) | 18.3 (16.8, 19.7) | 21.4 (20.1, 22.6) | 23.3 (22.0, 24.6) |
| urban-rural difference                            | 0.3 (-0.4, 1.1)                       | 0.4 (-0.6, 1.5)   | 0.4 (-0.4, 1.2)   | 0.3 (-0.4, 1.0)   | 0.2 (-0.5, 1.0)   | 0.2 (-0.4, 0.8)                       | 0.3 (-0.6, 1.2)   | 0.3 (-0.4, 0.9)   | 0.2 (-0.4, 0.8)   | 0.1 (-0.6, 0.8)   |
| <b>Georgia</b>                                    |                                       |                   |                   |                   |                   |                                       |                   |                   |                   |                   |
| rural                                             | 17.5 (16.0, 19.1)                     | 14.7 (12.8, 16.6) | 16.1 (14.6, 17.7) | 19.2 (17.6, 20.9) | 20.9 (19.2, 22.7) | 19.2 (18.5, 20.0)                     | 16.4 (15.4, 17.4) | 17.9 (17.1, 18.7) | 21.0 (19.9, 22.0) | 22.7 (21.4, 24.0) |
| urban                                             | 17.9 (16.4, 19.4)                     | 15.1 (13.2, 17.0) | 16.5 (15.0, 18.1) | 19.5 (17.9, 21.2) | 21.2 (19.5, 22.9) | 19.5 (18.8, 20.3)                     | 16.8 (15.8, 17.8) | 18.2 (17.4, 19.0) | 21.2 (20.1, 22.3) | 22.9 (21.6, 24.1) |
| urban-rural difference                            | 0.4 (-0.4, 1.1)                       | 0.5 (-0.4, 1.4)   | 0.4 (-0.4, 1.2)   | 0.3 (-0.4, 1.0)   | 0.3 (-0.6, 1.1)   | 0.3 (-0.2, 0.7)                       | 0.4 (-0.2, 1.0)   | 0.3 (-0.1, 0.8)   | 0.3 (-0.3, 0.8)   | 0.2 (-0.5, 0.9)   |
| <b>Kazakhstan</b>                                 |                                       |                   |                   |                   |                   |                                       |                   |                   |                   |                   |
| rural                                             | 17.0 (15.4, 18.6)                     | 13.9 (12.2, 15.6) | 15.6 (14.1, 17.2) | 18.6 (17.0, 20.2) | 21.1 (19.3, 22.9) | 18.6 (18.1, 19.1)                     | 15.5 (14.7, 16.2) | 17.2 (16.7, 17.7) | 20.2 (19.6, 20.8) | 22.6 (21.5, 23.7) |
| urban                                             | 17.6 (16.0, 19.2)                     | 14.6 (13.0, 16.3) | 16.3 (14.7, 17.9) | 19.1 (17.6, 20.8) | 21.5 (19.7, 23.4) | 19.1 (18.6, 19.7)                     | 16.2 (15.4, 16.9) | 17.8 (17.3, 18.3) | 20.7 (20.1, 21.3) | 23.1 (21.9, 24.3) |
| urban-rural difference                            | 0.6 (-0.1, 1.3)                       | 0.7 (-0.2, 1.6)   | 0.6 (-0.1, 1.4)   | 0.5 (-0.2, 1.3)   | 0.5 (-0.3, 1.3)   | 0.6 (0.2, 1.0)                        | 0.7 (0.2, 1.2)    | 0.6 (0.2, 1.0)    | 0.5 (0.0, 1.0)    | 0.5 (-0.2, 1.1)   |
| <b>Kyrgyzstan</b>                                 |                                       |                   |                   |                   |                   |                                       |                   |                   |                   |                   |

| Boys                                | Mean BMI in 1990 (kg/m <sup>2</sup> ) |                   |                   |                   |                   | Mean BMI in 2020 (kg/m <sup>2</sup> ) |                   |                   |                   |                   |
|-------------------------------------|---------------------------------------|-------------------|-------------------|-------------------|-------------------|---------------------------------------|-------------------|-------------------|-------------------|-------------------|
|                                     | Age-standardised                      | 5 years           | 10 years          | 15 years          | 19 years          | Age-standardised                      | 5 years           | 10 years          | 15 years          | 19 years          |
| rural                               | 16.7 (15.1, 18.4)                     | 14.2 (12.5, 15.9) | 15.4 (13.8, 17.0) | 18.3 (16.6, 20.0) | 20.2 (17.9, 22.4) | 18.3 (17.3, 19.3)                     | 15.7 (14.7, 16.7) | 16.9 (16.0, 17.8) | 19.9 (18.7, 21.0) | 21.7 (19.8, 23.6) |
| urban                               | 17.1 (15.6, 18.8)                     | 14.5 (12.8, 16.2) | 15.7 (14.2, 17.4) | 18.7 (17.1, 20.5) | 20.6 (18.3, 22.9) | 18.6 (17.6, 19.5)                     | 16.0 (14.9, 17.0) | 17.2 (16.3, 18.1) | 20.2 (19.0, 21.4) | 22.1 (20.2, 24.0) |
| urban-rural difference              | 0.4 (-0.3, 1.1)                       | 0.3 (-0.5, 1.3)   | 0.4 (-0.3, 1.1)   | 0.4 (-0.3, 1.2)   | 0.4 (-0.4, 1.3)   | 0.3 (-0.2, 0.8)                       | 0.3 (-0.4, 0.9)   | 0.3 (-0.2, 0.8)   | 0.3 (-0.3, 0.9)   | 0.4 (-0.4, 1.1)   |
| <b>Mongolia</b>                     |                                       |                   |                   |                   |                   |                                       |                   |                   |                   |                   |
| rural                               | 16.6 (15.0, 18.2)                     | 13.6 (10.6, 16.6) | 15.3 (13.7, 17.0) | 18.3 (16.9, 19.9) | 20.1 (18.5, 21.6) | 18.2 (17.2, 19.1)                     | 15.1 (12.5, 17.8) | 16.9 (15.9, 17.9) | 19.9 (19.1, 20.6) | 21.6 (20.8, 22.4) |
| urban                               | 16.8 (15.2, 18.4)                     | 13.9 (10.9, 16.9) | 15.5 (13.9, 17.2) | 18.5 (17.0, 20.0) | 20.2 (18.7, 21.8) | 18.3 (17.3, 19.2)                     | 15.3 (12.6, 17.8) | 17.0 (16.0, 18.0) | 19.9 (19.2, 20.6) | 21.6 (20.8, 22.4) |
| urban-rural difference              | 0.2 (-0.5, 0.9)                       | 0.2 (-0.8, 1.3)   | 0.2 (-0.6, 1.0)   | 0.2 (-0.5, 0.8)   | 0.1 (-0.5, 0.8)   | 0.1 (-0.4, 0.6)                       | 0.2 (-0.7, 1.0)   | 0.1 (-0.5, 0.7)   | 0.1 (-0.4, 0.5)   | 0.0 (-0.5, 0.6)   |
| <b>Tajikistan</b>                   |                                       |                   |                   |                   |                   |                                       |                   |                   |                   |                   |
| rural                               | 16.7 (15.1, 18.3)                     | 13.5 (11.6, 15.4) | 15.3 (13.6, 16.9) | 18.5 (16.8, 20.2) | 20.8 (19.0, 22.6) | 18.1 (17.4, 18.8)                     | 14.9 (13.8, 16.0) | 16.6 (15.8, 17.4) | 19.9 (18.8, 20.9) | 22.2 (21.1, 23.3) |
| urban                               | 16.9 (15.3, 18.6)                     | 13.7 (11.8, 15.6) | 15.5 (13.8, 17.1) | 18.7 (17.0, 20.5) | 21.1 (19.3, 22.9) | 18.2 (17.4, 18.9)                     | 14.9 (13.8, 16.0) | 16.7 (15.9, 17.5) | 20.0 (18.9, 21.1) | 22.4 (21.2, 23.5) |
| urban-rural difference              | 0.2 (-0.5, 1.0)                       | 0.1 (-0.7, 1.1)   | 0.2 (-0.5, 1.0)   | 0.3 (-0.4, 1.0)   | 0.3 (-0.5, 1.2)   | 0.1 (-0.4, 0.6)                       | 0.0 (-0.6, 0.6)   | 0.1 (-0.4, 0.5)   | 0.1 (-0.4, 0.7)   | 0.2 (-0.6, 0.9)   |
| <b>Turkmenistan</b>                 |                                       |                   |                   |                   |                   |                                       |                   |                   |                   |                   |
| rural                               | 17.1 (15.5, 18.7)                     | 13.5 (11.6, 15.5) | 15.7 (14.1, 17.4) | 19.1 (17.4, 20.8) | 21.1 (19.3, 22.8) | 18.9 (18.0, 19.7)                     | 15.3 (13.9, 16.6) | 17.5 (16.6, 18.4) | 20.9 (19.7, 22.0) | 22.8 (21.7, 23.9) |
| urban                               | 17.5 (15.9, 19.1)                     | 13.9 (11.9, 15.8) | 16.1 (14.5, 17.7) | 19.5 (17.8, 21.2) | 21.4 (19.7, 23.1) | 19.2 (18.3, 20.0)                     | 15.5 (14.2, 16.9) | 17.8 (16.9, 18.7) | 21.1 (20.0, 22.2) | 23.1 (22.0, 24.2) |
| urban-rural difference              | 0.4 (-0.4, 1.1)                       | 0.4 (-0.5, 1.3)   | 0.4 (-0.4, 1.2)   | 0.4 (-0.4, 1.1)   | 0.4 (-0.4, 1.2)   | 0.3 (-0.2, 0.8)                       | 0.3 (-0.4, 1.0)   | 0.3 (-0.2, 0.8)   | 0.3 (-0.3, 0.9)   | 0.3 (-0.5, 1.0)   |
| <b>Uzbekistan</b>                   |                                       |                   |                   |                   |                   |                                       |                   |                   |                   |                   |
| rural                               | 18.0 (16.3, 19.6)                     | 14.7 (11.6, 17.7) | 16.8 (15.0, 18.4) | 19.9 (18.4, 21.4) | 20.9 (19.3, 22.4) | 20.4 (19.3, 21.5)                     | 17.1 (14.3, 19.8) | 19.2 (18.0, 20.4) | 22.3 (21.4, 23.2) | 23.3 (22.5, 24.2) |
| urban                               | 18.1 (16.4, 19.8)                     | 14.9 (11.8, 18.0) | 16.9 (15.2, 18.6) | 20.0 (18.5, 21.5) | 20.9 (19.4, 22.5) | 20.4 (19.2, 21.6)                     | 17.2 (14.5, 20.1) | 19.2 (17.9, 20.5) | 22.3 (21.3, 23.3) | 23.2 (22.2, 24.2) |
| urban-rural difference              | 0.1 (-0.6, 0.9)                       | 0.3 (-0.8, 1.3)   | 0.2 (-0.6, 1.0)   | 0.1 (-0.6, 0.8)   | 0.0 (-0.7, 0.7)   | 0.0 (-0.6, 0.6)                       | 0.2 (-0.8, 1.1)   | 0.1 (-0.7, 0.7)   | 0.0 (-0.7, 0.5)   | -0.1 (-0.8, 0.5)  |
| <b>Middle East and north Africa</b> |                                       |                   |                   |                   |                   |                                       |                   |                   |                   |                   |
| <b>Algeria</b>                      |                                       |                   |                   |                   |                   |                                       |                   |                   |                   |                   |
| rural                               | 17.3 (15.5, 19.0)                     | 14.1 (11.1, 17.1) | 16.0 (14.1, 17.8) | 19.1 (17.5, 20.8) | 20.4 (18.8, 22.1) | 18.7 (17.4, 20.1)                     | 15.6 (12.8, 18.3) | 17.5 (16.0, 19.0) | 20.6 (19.4, 21.9) | 21.9 (20.8, 23.1) |
| urban                               | 17.6 (15.8, 19.3)                     | 14.2 (11.2, 17.2) | 16.2 (14.4, 18.1) | 19.6 (17.9, 21.2) | 21.0 (19.3, 22.7) | 19.3 (18.0, 20.6)                     | 15.9 (13.2, 18.6) | 18.0 (16.5, 19.4) | 21.3 (20.0, 22.6) | 22.7 (21.6, 23.8) |
| urban-rural difference              | 0.3 (-0.4, 1.0)                       | 0.1 (-0.9, 1.0)   | 0.3 (-0.5, 1.0)   | 0.4 (-0.3, 1.1)   | 0.6 (-0.2, 1.3)   | 0.6 (-0.1, 1.2)                       | 0.3 (-0.6, 1.2)   | 0.5 (-0.2, 1.2)   | 0.7 (0.1, 1.3)    | 0.8 (0.1, 1.5)    |
| <b>Bahrain</b>                      |                                       |                   |                   |                   |                   |                                       |                   |                   |                   |                   |
| rural                               | 18.4 (16.9, 19.8)                     | 14.8 (13.0, 16.6) | 17.0 (15.5, 18.5) | 20.4 (19.0, 21.8) | 22.2 (20.4, 24.0) | 20.3 (19.2, 21.4)                     | 16.7 (15.1, 18.3) | 18.9 (17.8, 20.0) | 22.3 (21.2, 23.4) | 24.1 (22.5, 25.6) |
| urban                               | 18.7 (17.4, 20.1)                     | 14.9 (13.2, 16.6) | 17.3 (15.9, 18.7) | 20.9 (19.5, 22.2) | 22.8 (21.1, 24.5) | 20.9 (20.0, 21.8)                     | 17.1 (15.7, 18.5) | 19.5 (18.5, 20.4) | 23.0 (22.1, 24.0) | 25.0 (23.6, 26.3) |
| urban-rural difference              | 0.3 (-0.4, 1.0)                       | 0.1 (-0.9, 1.0)   | 0.3 (-0.5, 1.0)   | 0.4 (-0.2, 1.1)   | 0.6 (-0.2, 1.4)   | 0.6 (0.0, 1.3)                        | 0.4 (-0.5, 1.3)   | 0.5 (-0.2, 1.3)   | 0.7 (0.1, 1.4)    | 0.9 (0.1, 1.6)    |
| <b>Egypt</b>                        |                                       |                   |                   |                   |                   |                                       |                   |                   |                   |                   |
| rural                               | 18.9 (17.5, 20.4)                     | 16.5 (14.8, 18.2) | 17.3 (15.9, 18.8) | 20.6 (19.2, 22.1) | 22.6 (21.2, 24.1) | 19.9 (19.0, 20.7)                     | 17.4 (16.2, 18.7) | 18.3 (17.5, 19.2) | 21.6 (20.8, 22.4) | 23.6 (22.8, 24.5) |
| urban                               | 19.1 (17.7, 20.6)                     | 16.6 (14.9, 18.3) | 17.5 (16.1, 19.0) | 20.9 (19.5, 22.3) | 22.9 (21.5, 24.4) | 20.3 (19.4, 21.2)                     | 17.8 (16.5, 19.2) | 18.7 (17.8, 19.6) | 22.1 (21.2, 22.9) | 24.1 (23.2, 25.0) |
| urban-rural difference              | 0.2 (-0.4, 0.8)                       | 0.1 (-0.6, 0.9)   | 0.2 (-0.4, 0.8)   | 0.2 (-0.3, 0.9)   | 0.3 (-0.4, 0.9)   | 0.4 (-0.1, 0.9)                       | 0.4 (-0.4, 1.1)   | 0.4 (-0.1, 0.9)   | 0.5 (0.0, 0.9)    | 0.5 (0.0, 1.0)    |
| <b>Iran</b>                         |                                       |                   |                   |                   |                   |                                       |                   |                   |                   |                   |
| rural                               | 16.8 (16.2, 17.4)                     | 14.3 (13.7, 14.9) | 15.6 (15.0, 16.2) | 18.4 (17.8, 19.1) | 20.1 (19.5, 20.8) | 18.8 (18.1, 19.4)                     | 16.2 (15.6, 16.9) | 17.5 (16.9, 18.2) | 20.4 (19.7, 21.0) | 22.0 (21.4, 22.7) |
| urban                               | 17.4 (16.8, 18.0)                     | 14.4 (13.8, 15.0) | 16.0 (15.4, 16.6) | 19.2 (18.6, 19.8) | 21.2 (20.5, 21.8) | 19.8 (19.1, 20.4)                     | 16.7 (16.1, 17.4) | 18.4 (17.7, 19.0) | 21.6 (20.9, 22.2) | 23.5 (22.9, 24.2) |
| urban-rural difference              | 0.6 (0.2, 0.9)                        | 0.1 (-0.3, 0.5)   | 0.4 (0.1, 0.8)    | 0.8 (0.4, 1.1)    | 1.1 (0.7, 1.4)    | 1.0 (0.7, 1.3)                        | 0.5 (0.2, 0.9)    | 0.9 (0.6, 1.2)    | 1.2 (0.9, 1.5)    | 1.5 (1.2, 1.8)    |
| <b>Iraq</b>                         |                                       |                   |                   |                   |                   |                                       |                   |                   |                   |                   |
| rural                               | 18.2 (16.5, 20.0)                     | 15.0 (12.1, 18.1) | 16.9 (15.1, 18.7) | 20.1 (18.4, 21.8) | 21.6 (19.7, 23.4) | 19.9 (18.5, 21.3)                     | 16.7 (14.0, 19.5) | 18.6 (17.1, 20.1) | 21.8 (20.5, 23.2) | 23.2 (21.8, 24.8) |
| urban                               | 18.6 (16.8, 20.3)                     | 15.1 (12.3, 18.2) | 17.2 (15.4, 19.0) | 20.6 (19.0, 22.2) | 22.2 (20.4, 24.0) | 20.5 (19.2, 21.9)                     | 17.1 (14.3, 19.8) | 19.2 (17.7, 20.6) | 22.5 (21.3, 23.8) | 24.1 (22.8, 25.6) |
| urban-rural difference              | 0.4 (-0.3, 1.1)                       | 0.1 (-0.8, 1.1)   | 0.3 (-0.5, 1.0)   | 0.5 (-0.2, 1.2)   | 0.6 (-0.2, 1.4)   | 0.6 (0.0, 1.3)                        | 0.4 (-0.5, 1.3)   | 0.6 (-0.1, 1.3)   | 0.7 (0.1, 1.4)    | 0.9 (0.1, 1.6)    |
| <b>Jordan</b>                       |                                       |                   |                   |                   |                   |                                       |                   |                   |                   |                   |
| rural                               | 17.8 (16.4, 19.2)                     | 14.0 (12.3, 15.6) | 16.5 (15.1, 18.0) | 19.8 (18.4, 21.3) | 21.5 (20.0, 23.1) | 19.3 (18.4, 20.1)                     | 15.5 (14.3, 16.7) | 18.0 (17.1, 18.9) | 21.3 (20.4, 22.2) | 23.0 (22.0, 24.0) |
| urban                               | 17.8 (16.4, 19.3)                     | 13.6 (12.0, 15.2) | 16.5 (15.0, 17.9) | 20.0 (18.6, 21.5) | 22.0 (20.4, 23.6) | 19.6 (18.8, 20.3)                     | 15.3 (14.3, 16.4) | 18.2 (17.4, 19.0) | 21.8 (21.0, 22.6) | 23.7 (22.8, 24.6) |
| urban-rural difference              | 0.0 (-0.6, 0.7)                       | -0.4 (-1.2, 0.4)  | -0.1 (-0.7, 0.6)  | 0.2 (-0.4, 0.9)   | 0.5 (-0.2, 1.2)   | 0.3 (-0.2, 0.8)                       | -0.1 (-0.9, 0.5)  | 0.2 (-0.4, 0.7)   | 0.5 (-0.1, 1.0)   | 0.7 (0.1, 1.3)    |
| <b>Kuwait</b>                       |                                       |                   |                   |                   |                   |                                       |                   |                   |                   |                   |
| rural                               | 19.7 (18.4, 21.1)                     | 14.6 (13.1, 16.1) | 18.4 (17.0, 19.8) | 22.6 (21.3, 24.0) | 22.8 (21.4, 24.2) | 21.2 (20.1, 22.4)                     | 16.1 (14.8, 17.5) | 19.9 (18.8, 21.1) | 24.2 (23.0, 25.3) | 24.4 (23.2, 25.6) |
| urban                               | 20.1 (18.9, 21.3)                     | 14.6 (13.4, 15.8) | 18.7 (17.5, 19.9) | 23.2 (22.0, 24.4) | 23.7 (22.4, 24.9) | 21.9 (20.9, 22.9)                     | 16.3 (15.4, 17.3) | 20.5 (19.5, 21.4) | 25.0 (24.0, 26.0) | 25.4 (24.4, 26.4) |
| urban-rural difference              | 0.4 (-0.3, 1.1)                       | 0.0 (-0.9, 0.9)   | 0.3 (-0.4, 1.0)   | 0.6 (-0.1, 1.3)   | 0.8 (0.1, 1.6)    | 0.6 (0.0, 1.3)                        | 0.2 (-0.7, 1.1)   | 0.5 (-0.2, 1.2)   | 0.8 (0.2, 1.5)    | 1.1 (0.3, 1.8)    |
| <b>Lebanon</b>                      |                                       |                   |                   |                   |                   |                                       |                   |                   |                   |                   |
| rural                               | 18.6 (17.4, 19.7)                     | 14.7 (13.4, 15.9) | 17.1 (15.9, 18.2) | 20.6 (19.4, 21.8) | 22.9 (21.5, 24.2) | 20.5 (19.3, 21.8)                     | 16.7 (15.4, 18.0) | 19.1 (17.9, 20.4) | 22.6 (21.4, 23.9) | 24.8 (23.5, 26.3) |
| urban                               | 19.0 (17.8, 20.1)                     | 14.8 (13.5, 16.0) | 17.4 (16.2, 18.6) | 21.2 (20.0, 22.4) | 23.6 (22.3, 25.0) | 21.2 (20.1, 22.5)                     | 17.0 (15.8, 18.3) | 19.7 (18.5, 20.9) | 23.4 (22.3, 24.7) | 25.9 (24.5, 27.3) |



| Boys                                  | Mean BMI in 1990 (kg/m <sup>2</sup> ) |                   |                   |                   |                   | Mean BMI in 2020 (kg/m <sup>2</sup> ) |                   |                   |                   |                   |
|---------------------------------------|---------------------------------------|-------------------|-------------------|-------------------|-------------------|---------------------------------------|-------------------|-------------------|-------------------|-------------------|
|                                       | Age-standardised                      | 5 years           | 10 years          | 15 years          | 19 years          | Age-standardised                      | 5 years           | 10 years          | 15 years          | 19 years          |
| urban-rural difference                | 0.4 (-0.1, 1.0)                       | 0.1 (-0.6, 0.7)   | 0.3 (-0.2, 0.9)   | 0.6 (0.0, 1.1)    | 0.8 (0.1, 1.4)    | 0.7 (0.1, 1.2)                        | 0.3 (-0.3, 1.0)   | 0.6 (0.0, 1.1)    | 0.8 (0.3, 1.4)    | 1.0 (0.3, 1.7)    |
| <b>Libya</b>                          |                                       |                   |                   |                   |                   |                                       |                   |                   |                   |                   |
| rural                                 | 18.0 (15.8, 20.2)                     | 14.9 (11.7, 18.1) | 16.7 (14.4, 18.9) | 19.8 (17.7, 22.0) | 21.5 (18.9, 24.0) | 19.6 (17.4, 21.8)                     | 16.5 (13.2, 19.7) | 18.3 (16.1, 20.4) | 21.5 (19.3, 23.5) | 23.1 (20.6, 25.6) |
| urban                                 | 18.3 (16.1, 20.6)                     | 15.0 (11.7, 18.2) | 16.9 (14.7, 19.2) | 20.3 (18.1, 22.4) | 22.0 (19.5, 24.6) | 20.2 (18.1, 22.4)                     | 16.9 (13.6, 20.1) | 18.8 (16.6, 21.0) | 22.2 (20.1, 24.2) | 23.9 (21.4, 26.4) |
| urban-rural difference                | 0.3 (-0.4, 1.0)                       | 0.1 (-0.9, 1.0)   | 0.3 (-0.5, 1.0)   | 0.4 (-0.3, 1.1)   | 0.6 (-0.2, 1.4)   | 0.6 (-0.1, 1.3)                       | 0.3 (-0.6, 1.3)   | 0.5 (-0.2, 1.2)   | 0.7 (0.0, 1.4)    | 0.8 (0.1, 1.6)    |
| <b>Morocco</b>                        |                                       |                   |                   |                   |                   |                                       |                   |                   |                   |                   |
| rural                                 | 16.5 (15.0, 18.1)                     | 14.1 (12.4, 15.9) | 15.4 (13.8, 17.0) | 18.2 (16.7, 19.8) | 18.9 (17.2, 20.6) | 17.9 (17.3, 18.5)                     | 15.5 (14.6, 16.3) | 16.8 (16.2, 17.4) | 19.6 (18.9, 20.3) | 20.3 (19.3, 21.3) |
| urban                                 | 16.8 (15.3, 18.4)                     | 14.1 (12.5, 15.8) | 15.6 (14.0, 17.2) | 18.6 (17.0, 20.2) | 19.4 (17.7, 21.0) | 18.4 (17.8, 19.0)                     | 15.7 (14.9, 16.5) | 17.2 (16.6, 17.8) | 20.2 (19.5, 20.9) | 21.0 (20.0, 22.0) |
| urban-rural difference                | 0.3 (-0.4, 1.0)                       | 0.0 (-0.8, 0.9)   | 0.2 (-0.5, 0.9)   | 0.4 (-0.3, 1.1)   | 0.5 (-0.3, 1.2)   | 0.5 (0.0, 1.0)                        | 0.3 (-0.4, 0.9)   | 0.4 (-0.1, 0.9)   | 0.6 (0.1, 1.1)    | 0.7 (0.1, 1.3)    |
| <b>Occupied Palestinian Territory</b> |                                       |                   |                   |                   |                   |                                       |                   |                   |                   |                   |
| rural                                 | 17.8 (16.3, 19.5)                     | 14.7 (11.8, 17.7) | 16.3 (14.7, 18.0) | 19.7 (18.2, 21.2) | 22.1 (20.5, 23.7) | 19.4 (18.0, 20.8)                     | 16.3 (13.5, 19.1) | 17.9 (16.5, 19.3) | 21.3 (20.0, 22.5) | 23.7 (22.1, 25.1) |
| urban                                 | 18.2 (16.6, 19.8)                     | 14.7 (11.9, 17.7) | 16.6 (15.0, 18.2) | 20.1 (18.7, 21.6) | 22.7 (21.1, 24.3) | 20.0 (18.7, 21.3)                     | 16.6 (13.9, 19.3) | 18.4 (17.1, 19.7) | 22.0 (20.8, 23.2) | 24.5 (23.1, 25.9) |
| urban-rural difference                | 0.3 (-0.4, 1.0)                       | 0.0 (-0.9, 1.0)   | 0.3 (-0.5, 1.0)   | 0.5 (-0.2, 1.1)   | 0.6 (-0.1, 1.4)   | 0.6 (-0.1, 1.3)                       | 0.3 (-0.6, 1.2)   | 0.5 (-0.2, 1.2)   | 0.7 (0.1, 1.4)    | 0.9 (0.2, 1.6)    |
| <b>Oman</b>                           |                                       |                   |                   |                   |                   |                                       |                   |                   |                   |                   |
| rural                                 | 18.2 (16.5, 19.8)                     | 15.2 (12.3, 18.1) | 16.9 (15.2, 18.5) | 19.9 (18.5, 21.4) | 21.6 (19.9, 23.3) | 19.9 (18.7, 21.1)                     | 17.0 (14.2, 19.7) | 18.6 (17.4, 19.8) | 21.6 (20.6, 22.7) | 23.3 (21.9, 24.7) |
| urban                                 | 18.5 (16.9, 20.1)                     | 15.3 (12.4, 18.1) | 17.1 (15.5, 18.7) | 20.3 (18.9, 21.8) | 22.1 (20.5, 23.8) | 20.5 (19.3, 21.6)                     | 17.4 (14.7, 20.0) | 19.1 (17.9, 20.3) | 22.3 (21.4, 23.3) | 24.2 (22.9, 25.5) |
| urban-rural difference                | 0.3 (-0.4, 1.0)                       | 0.1 (-0.8, 1.1)   | 0.3 (-0.5, 1.0)   | 0.4 (-0.3, 1.1)   | 0.6 (-0.2, 1.3)   | 0.6 (0.0, 1.2)                        | 0.4 (-0.5, 1.3)   | 0.5 (-0.2, 1.2)   | 0.7 (0.1, 1.3)    | 0.8 (0.1, 1.5)    |
| <b>Qatar</b>                          |                                       |                   |                   |                   |                   |                                       |                   |                   |                   |                   |
| rural                                 | 19.6 (17.9, 21.4)                     | 16.5 (13.7, 19.4) | 18.2 (16.5, 20.0) | 21.5 (19.8, 23.1) | 23.3 (21.4, 25.1) | 21.4 (19.9, 22.9)                     | 18.3 (15.5, 21.1) | 20.0 (18.5, 21.5) | 23.3 (21.8, 24.6) | 25.0 (23.4, 26.7) |
| urban                                 | 20.0 (18.4, 21.7)                     | 16.7 (13.9, 19.6) | 18.6 (16.9, 20.2) | 22.0 (20.4, 23.5) | 23.9 (22.1, 25.6) | 22.1 (20.6, 23.5)                     | 18.8 (16.0, 21.5) | 20.6 (19.2, 22.1) | 24.0 (22.7, 25.3) | 26.0 (24.4, 27.5) |
| urban-rural difference                | 0.4 (-0.3, 1.1)                       | 0.2 (-0.8, 1.1)   | 0.3 (-0.4, 1.1)   | 0.5 (-0.2, 1.2)   | 0.7 (-0.1, 1.4)   | 0.7 (0.0, 1.3)                        | 0.4 (-0.5, 1.3)   | 0.6 (-0.1, 1.3)   | 0.8 (0.2, 1.4)    | 0.9 (0.2, 1.6)    |
| <b>Saudi Arabia</b>                   |                                       |                   |                   |                   |                   |                                       |                   |                   |                   |                   |
| rural                                 | 18.2 (17.1, 19.2)                     | 13.9 (12.5, 15.2) | 16.8 (15.7, 17.9) | 20.4 (19.4, 21.5) | 22.2 (21.1, 23.3) | 19.9 (18.7, 21.0)                     | 15.6 (14.2, 17.0) | 18.5 (17.3, 19.7) | 22.1 (21.0, 23.2) | 24.0 (22.7, 25.2) |
| urban                                 | 18.5 (17.5, 19.5)                     | 13.9 (12.7, 15.0) | 17.0 (16.0, 18.1) | 20.9 (19.9, 21.9) | 23.0 (21.9, 24.0) | 20.5 (19.4, 21.6)                     | 15.9 (14.7, 17.1) | 19.0 (17.9, 20.1) | 22.9 (21.8, 24.0) | 24.9 (23.8, 26.1) |
| urban-rural difference                | 0.3 (-0.3, 1.0)                       | 0.0 (-0.9, 0.9)   | 0.2 (-0.5, 1.0)   | 0.5 (-0.1, 1.1)   | 0.7 (0.0, 1.4)    | 0.6 (0.1, 1.2)                        | 0.3 (-0.6, 1.1)   | 0.5 (-0.1, 1.1)   | 0.8 (0.2, 1.3)    | 1.0 (0.4, 1.6)    |
| <b>Syrian Arab Republic</b>           |                                       |                   |                   |                   |                   |                                       |                   |                   |                   |                   |
| rural                                 | 18.0 (15.7, 20.3)                     | 14.8 (11.6, 18.3) | 16.6 (14.4, 19.0) | 19.8 (17.7, 22.1) | 21.5 (18.9, 24.2) | 19.6 (17.5, 21.8)                     | 16.5 (13.3, 19.9) | 18.3 (16.1, 20.5) | 21.5 (19.4, 23.6) | 23.1 (20.6, 25.7) |
| urban                                 | 18.3 (16.1, 20.6)                     | 14.9 (11.6, 18.4) | 16.9 (14.7, 19.2) | 20.3 (18.1, 22.5) | 22.1 (19.5, 24.8) | 20.2 (18.0, 22.4)                     | 16.8 (13.6, 20.2) | 18.8 (16.6, 21.0) | 22.2 (20.0, 24.3) | 23.9 (21.4, 26.5) |
| urban-rural difference                | 0.3 (-0.4, 1.1)                       | 0.1 (-0.8, 1.1)   | 0.3 (-0.5, 1.0)   | 0.4 (-0.3, 1.1)   | 0.6 (-0.2, 1.4)   | 0.6 (-0.1, 1.2)                       | 0.4 (-0.6, 1.3)   | 0.5 (-0.2, 1.2)   | 0.7 (0.0, 1.4)    | 0.8 (0.1, 1.6)    |
| <b>Tunisia</b>                        |                                       |                   |                   |                   |                   |                                       |                   |                   |                   |                   |
| rural                                 | 16.8 (15.7, 18.0)                     | 14.9 (13.7, 16.1) | 15.6 (14.4, 16.7) | 18.2 (17.0, 19.3) | 19.9 (18.7, 21.1) | 18.7 (17.4, 20.0)                     | 16.7 (15.4, 18.1) | 17.4 (16.1, 18.8) | 20.0 (18.7, 21.3) | 21.7 (20.4, 23.1) |
| urban                                 | 17.2 (16.0, 18.3)                     | 14.8 (13.7, 16.0) | 15.8 (14.7, 17.0) | 18.7 (17.5, 19.8) | 20.6 (19.4, 21.8) | 19.3 (18.0, 20.6)                     | 16.9 (15.6, 18.3) | 17.9 (16.6, 19.3) | 20.8 (19.5, 22.1) | 22.7 (21.3, 24.0) |
| urban-rural difference                | 0.3 (-0.2, 0.9)                       | 0.0 (-0.6, 0.6)   | 0.2 (-0.3, 0.8)   | 0.5 (0.0, 1.0)    | 0.7 (0.2, 1.3)    | 0.6 (0.0, 1.1)                        | 0.2 (-0.5, 0.9)   | 0.5 (-0.1, 1.0)   | 0.7 (0.2, 1.3)    | 1.0 (0.4, 1.5)    |
| <b>Turkey</b>                         |                                       |                   |                   |                   |                   |                                       |                   |                   |                   |                   |
| rural                                 | 17.5 (16.1, 18.8)                     | 14.2 (12.7, 15.8) | 16.1 (14.7, 17.6) | 19.4 (18.0, 20.7) | 21.0 (19.5, 22.4) | 19.0 (18.3, 19.8)                     | 15.8 (14.9, 16.7) | 17.7 (16.9, 18.6) | 20.9 (20.0, 21.8) | 22.5 (21.5, 23.5) |
| urban                                 | 17.8 (16.4, 19.2)                     | 14.5 (13.0, 16.1) | 16.5 (15.1, 17.9) | 19.7 (18.3, 21.1) | 21.3 (19.9, 22.7) | 19.7 (18.9, 20.4)                     | 16.4 (15.5, 17.3) | 18.3 (17.5, 19.2) | 21.6 (20.7, 22.4) | 23.2 (22.3, 24.1) |
| urban-rural difference                | 0.3 (-0.2, 0.9)                       | 0.3 (-0.4, 1.0)   | 0.3 (-0.3, 0.9)   | 0.4 (-0.2, 0.9)   | 0.4 (-0.3, 1.0)   | 0.6 (0.2, 1.1)                        | 0.6 (0.0, 1.2)    | 0.6 (0.2, 1.0)    | 0.6 (0.2, 1.1)    | 0.7 (0.1, 1.2)    |
| <b>United Arab Emirates</b>           |                                       |                   |                   |                   |                   |                                       |                   |                   |                   |                   |
| rural                                 | 19.1 (17.5, 20.6)                     | 16.2 (13.5, 19.0) | 17.7 (16.1, 19.3) | 20.8 (19.3, 22.3) | 22.5 (20.7, 24.2) | 20.9 (19.8, 22.0)                     | 18.1 (15.5, 20.6) | 19.6 (18.5, 20.7) | 22.7 (21.7, 23.7) | 24.3 (23.0, 25.6) |
| urban                                 | 19.6 (18.1, 21.1)                     | 16.4 (13.7, 19.2) | 18.2 (16.7, 19.7) | 21.5 (20.1, 22.9) | 23.3 (21.7, 25.1) | 21.8 (20.8, 22.8)                     | 18.6 (16.1, 21.1) | 20.3 (19.3, 21.3) | 23.7 (22.8, 24.5) | 25.5 (24.3, 26.8) |
| urban-rural difference                | 0.5 (-0.2, 1.2)                       | 0.2 (-0.7, 1.1)   | 0.4 (-0.3, 1.2)   | 0.7 (0.0, 1.4)    | 0.9 (0.1, 1.7)    | 0.8 (0.2, 1.5)                        | 0.5 (-0.4, 1.4)   | 0.7 (0.1, 1.5)    | 1.0 (0.4, 1.6)    | 1.2 (0.5, 1.9)    |
| <b>Yemen</b>                          |                                       |                   |                   |                   |                   |                                       |                   |                   |                   |                   |
| rural                                 | 16.6 (15.1, 18.1)                     | 14.7 (13.1, 16.2) | 15.2 (13.8, 16.7) | 18.0 (16.5, 19.5) | 19.8 (18.2, 21.3) | 18.2 (16.9, 19.5)                     | 16.2 (14.9, 17.6) | 16.8 (15.5, 18.1) | 19.6 (18.3, 20.9) | 21.3 (19.9, 22.7) |
| urban                                 | 17.0 (15.5, 18.4)                     | 14.9 (13.4, 16.4) | 15.6 (14.1, 17.0) | 18.4 (17.0, 19.9) | 20.3 (18.7, 21.8) | 18.8 (17.5, 20.1)                     | 16.7 (15.3, 18.1) | 17.4 (16.1, 18.7) | 20.3 (18.9, 21.6) | 22.1 (20.7, 23.5) |
| urban-rural difference                | 0.4 (-0.2, 0.9)                       | 0.2 (-0.5, 0.9)   | 0.3 (-0.2, 0.9)   | 0.4 (-0.1, 1.0)   | 0.5 (-0.1, 1.1)   | 0.6 (0.1, 1.1)                        | 0.5 (-0.1, 1.1)   | 0.6 (0.1, 1.1)    | 0.7 (0.2, 1.2)    | 0.8 (0.2, 1.4)    |
| <b>East and southeast Asia</b>        |                                       |                   |                   |                   |                   |                                       |                   |                   |                   |                   |
| <b>East Asia</b>                      |                                       |                   |                   |                   |                   |                                       |                   |                   |                   |                   |
| <b>China</b>                          |                                       |                   |                   |                   |                   |                                       |                   |                   |                   |                   |
| rural                                 | 17.5 (17.1, 17.9)                     | 14.9 (14.5, 15.3) | 16.4 (16.1, 16.8) | 19.0 (18.6, 19.4) | 20.2 (19.8, 20.6) | 19.8 (19.0, 20.6)                     | 17.3 (16.4, 18.1) | 18.8 (18.0, 19.6) | 21.3 (20.5, 22.1) | 22.5 (21.7, 23.3) |
| urban                                 | 17.9 (17.5, 18.3)                     | 15.3 (14.9, 15.7) | 16.9 (16.5, 17.3) | 19.5 (19.1, 19.9) | 20.8 (20.3, 21.2) | 20.3 (19.5, 21.1)                     | 17.7 (16.9, 18.5) | 19.3 (18.5, 20.0) | 21.9 (21.1, 22.7) | 23.1 (22.3, 23.9) |
| urban-rural difference                | 0.5 (0.2, 0.7)                        | 0.4 (0.1, 0.7)    | 0.4 (0.2, 0.7)    | 0.5 (0.2, 0.8)    | 0.6 (0.3, 0.8)    | 0.5 (0.2, 0.8)                        | 0.4 (0.1, 0.7)    | 0.5 (0.2, 0.8)    | 0.5 (0.2, 0.8)    | 0.6 (0.3, 0.9)    |

| Boys                     | Mean BMI in 1990 (kg/m <sup>2</sup> ) |                   |                   |                   |                   | Mean BMI in 2020 (kg/m <sup>2</sup> ) |                   |                   |                   |                   |
|--------------------------|---------------------------------------|-------------------|-------------------|-------------------|-------------------|---------------------------------------|-------------------|-------------------|-------------------|-------------------|
|                          | Age-standardised                      | 5 years           | 10 years          | 15 years          | 19 years          | Age-standardised                      | 5 years           | 10 years          | 15 years          | 19 years          |
| <b>North Korea</b>       |                                       |                   |                   |                   |                   |                                       |                   |                   |                   |                   |
| rural                    | 17.4 (15.1, 19.8)                     | 14.7 (11.2, 18.2) | 16.4 (14.0, 18.8) | 19.0 (16.7, 21.3) | 20.4 (17.6, 23.2) | 19.4 (17.0, 21.8)                     | 16.6 (13.1, 20.3) | 18.3 (16.0, 20.7) | 20.9 (18.6, 23.2) | 22.3 (19.5, 25.1) |
| urban                    | 17.8 (15.5, 20.2)                     | 15.0 (11.5, 18.7) | 16.8 (14.4, 19.2) | 19.4 (17.1, 21.7) | 20.8 (17.9, 23.5) | 19.8 (17.4, 22.2)                     | 17.0 (13.5, 20.7) | 18.7 (16.4, 21.1) | 21.3 (19.0, 23.6) | 22.7 (20.0, 25.5) |
| urban-rural difference   | 0.4 (-0.3, 1.1)                       | 0.4 (-0.6, 1.3)   | 0.4 (-0.4, 1.1)   | 0.4 (-0.3, 1.1)   | 0.4 (-0.4, 1.1)   | 0.4 (-0.3, 1.1)                       | 0.4 (-0.5, 1.3)   | 0.4 (-0.4, 1.1)   | 0.4 (-0.3, 1.0)   | 0.4 (-0.4, 1.2)   |
| <b>Taiwan</b>            |                                       |                   |                   |                   |                   |                                       |                   |                   |                   |                   |
| rural                    | 17.9 (16.8, 18.9)                     | 14.5 (13.4, 15.7) | 16.9 (15.9, 18.0) | 19.5 (18.5, 20.6) | 21.0 (19.7, 22.2) | 19.5 (18.9, 20.2)                     | 16.2 (15.4, 17.0) | 18.6 (17.9, 19.3) | 21.2 (20.5, 21.8) | 22.6 (21.7, 23.5) |
| urban                    | 18.2 (17.2, 19.2)                     | 14.9 (13.8, 16.0) | 17.3 (16.2, 18.3) | 19.8 (18.8, 20.8) | 21.2 (20.0, 22.4) | 19.8 (19.1, 20.4)                     | 16.5 (15.7, 17.3) | 18.8 (18.2, 19.6) | 21.4 (20.7, 22.0) | 22.8 (21.9, 23.7) |
| urban-rural difference   | 0.3 (-0.3, 1.0)                       | 0.4 (-0.4, 1.2)   | 0.3 (-0.3, 1.0)   | 0.3 (-0.3, 0.9)   | 0.2 (-0.5, 0.9)   | 0.2 (-0.3, 0.7)                       | 0.3 (-0.4, 1.0)   | 0.3 (-0.3, 0.8)   | 0.2 (-0.3, 0.7)   | 0.1 (-0.4, 0.7)   |
| <b>Southeast Asia</b>    |                                       |                   |                   |                   |                   |                                       |                   |                   |                   |                   |
| <b>Brunei Darussalam</b> |                                       |                   |                   |                   |                   |                                       |                   |                   |                   |                   |
| rural                    | 18.3 (16.9, 19.7)                     | 14.6 (12.9, 16.3) | 17.4 (16.0, 18.8) | 20.3 (18.8, 21.7) | 20.7 (19.0, 22.3) | 20.8 (20.0, 21.6)                     | 17.1 (15.9, 18.4) | 19.9 (19.1, 20.8) | 22.8 (22.0, 23.6) | 23.2 (22.0, 24.4) |
| urban                    | 18.4 (16.9, 19.7)                     | 14.7 (12.9, 16.3) | 17.5 (16.1, 18.9) | 20.4 (18.9, 21.7) | 20.8 (19.1, 22.4) | 21.2 (20.5, 21.9)                     | 17.5 (16.2, 18.7) | 20.3 (19.6, 21.1) | 23.1 (22.5, 23.8) | 23.6 (22.4, 24.7) |
| urban-rural difference   | 0.1 (-0.6, 0.7)                       | 0.1 (-0.7, 0.9)   | 0.1 (-0.6, 0.7)   | 0.1 (-0.6, 0.7)   | 0.1 (-0.6, 0.8)   | 0.4 (-0.2, 0.9)                       | 0.4 (-0.4, 1.1)   | 0.4 (-0.2, 0.9)   | 0.4 (-0.2, 0.9)   | 0.3 (-0.3, 1.0)   |
| <b>Cambodia</b>          |                                       |                   |                   |                   |                   |                                       |                   |                   |                   |                   |
| rural                    | 16.7 (14.4, 19.0)                     | 14.0 (10.7, 17.4) | 15.6 (13.3, 17.9) | 18.2 (16.0, 20.3) | 19.6 (17.0, 22.2) | 18.6 (16.3, 20.8)                     | 16.0 (12.6, 19.3) | 17.5 (15.2, 19.7) | 20.1 (18.0, 22.2) | 21.6 (19.0, 24.1) |
| urban                    | 16.9 (14.6, 19.2)                     | 14.3 (11.0, 17.7) | 15.8 (13.6, 18.1) | 18.4 (16.2, 20.6) | 19.8 (17.2, 22.4) | 19.1 (16.8, 21.3)                     | 16.5 (13.2, 19.9) | 18.1 (15.8, 20.2) | 20.6 (18.5, 22.7) | 22.0 (19.5, 24.5) |
| urban-rural difference   | 0.2 (-0.4, 0.9)                       | 0.3 (-0.6, 1.2)   | 0.3 (-0.5, 1.0)   | 0.2 (-0.4, 0.9)   | 0.2 (-0.6, 0.9)   | 0.5 (-0.1, 1.2)                       | 0.6 (-0.3, 1.5)   | 0.6 (-0.1, 1.3)   | 0.5 (-0.1, 1.2)   | 0.5 (-0.2, 1.2)   |
| <b>Indonesia</b>         |                                       |                   |                   |                   |                   |                                       |                   |                   |                   |                   |
| rural                    | 16.6 (15.8, 17.4)                     | 14.3 (13.5, 15.2) | 15.4 (14.6, 16.2) | 17.9 (17.1, 18.8) | 19.5 (18.7, 20.4) | 18.0 (17.3, 18.6)                     | 15.7 (15.1, 16.4) | 16.8 (16.2, 17.4) | 19.3 (18.7, 20.0) | 20.9 (20.3, 21.6) |
| urban                    | 16.8 (16.0, 17.6)                     | 14.6 (13.7, 15.4) | 15.6 (14.8, 16.4) | 18.2 (17.3, 19.0) | 19.7 (18.9, 20.6) | 18.5 (17.9, 19.1)                     | 16.3 (15.7, 17.0) | 17.4 (16.7, 18.0) | 19.9 (19.3, 20.5) | 21.5 (20.8, 22.1) |
| urban-rural difference   | 0.2 (-0.2, 0.6)                       | 0.2 (-0.2, 0.6)   | 0.2 (-0.1, 0.6)   | 0.2 (-0.2, 0.6)   | 0.2 (-0.2, 0.6)   | 0.6 (0.3, 0.9)                        | 0.6 (0.2, 1.0)    | 0.6 (0.3, 0.9)    | 0.6 (0.2, 0.9)    | 0.6 (0.2, 0.9)    |
| <b>Lao PDR</b>           |                                       |                   |                   |                   |                   |                                       |                   |                   |                   |                   |
| rural                    | 16.6 (14.9, 18.3)                     | 13.9 (10.9, 16.8) | 15.5 (13.8, 17.3) | 18.2 (16.6, 19.8) | 19.3 (17.7, 20.9) | 18.5 (17.0, 20.0)                     | 15.8 (12.9, 18.7) | 17.4 (15.8, 19.1) | 20.1 (18.6, 21.5) | 21.2 (19.8, 22.6) |
| urban                    | 16.8 (15.2, 18.6)                     | 14.1 (11.2, 17.1) | 15.8 (14.0, 17.6) | 18.4 (16.8, 20.1) | 19.5 (17.9, 21.2) | 19.0 (17.5, 20.6)                     | 16.4 (13.4, 19.2) | 18.0 (16.3, 19.6) | 20.6 (19.1, 22.1) | 21.7 (20.3, 23.1) |
| urban-rural difference   | 0.2 (-0.4, 0.9)                       | 0.3 (-0.6, 1.2)   | 0.3 (-0.5, 1.0)   | 0.2 (-0.4, 0.9)   | 0.2 (-0.6, 0.9)   | 0.5 (-0.1, 1.2)                       | 0.6 (-0.3, 1.5)   | 0.6 (-0.1, 1.2)   | 0.5 (-0.1, 1.1)   | 0.5 (-0.2, 1.2)   |
| <b>Malaysia</b>          |                                       |                   |                   |                   |                   |                                       |                   |                   |                   |                   |
| rural                    | 17.2 (16.2, 18.2)                     | 13.5 (12.4, 14.6) | 16.2 (15.2, 17.3) | 19.1 (18.0, 20.1) | 20.3 (19.2, 21.3) | 19.5 (18.9, 20.0)                     | 15.8 (15.1, 16.4) | 18.5 (17.9, 19.1) | 21.3 (20.7, 21.9) | 22.5 (21.9, 23.2) |
| urban                    | 17.4 (16.4, 18.5)                     | 13.7 (12.6, 14.7) | 16.4 (15.4, 17.5) | 19.3 (18.3, 20.4) | 20.5 (19.5, 21.6) | 20.0 (19.4, 20.5)                     | 16.2 (15.6, 16.8) | 19.0 (18.4, 19.5) | 21.8 (21.2, 22.4) | 23.1 (22.4, 23.7) |
| urban-rural difference   | 0.2 (-0.2, 0.7)                       | 0.2 (-0.3, 0.7)   | 0.2 (-0.2, 0.7)   | 0.2 (-0.2, 0.7)   | 0.3 (-0.2, 0.8)   | 0.5 (0.2, 0.8)                        | 0.4 (0.0, 0.8)    | 0.5 (0.1, 0.8)    | 0.5 (0.2, 0.9)    | 0.6 (0.1, 0.9)    |
| <b>Maldives</b>          |                                       |                   |                   |                   |                   |                                       |                   |                   |                   |                   |
| rural                    | 16.7 (15.1, 18.1)                     | 14.0 (11.1, 16.9) | 15.8 (14.3, 17.3) | 18.3 (16.9, 19.6) | 18.7 (17.2, 20.2) | 18.9 (17.8, 19.9)                     | 16.2 (13.5, 18.9) | 18.0 (16.9, 19.1) | 20.5 (19.7, 21.3) | 21.0 (20.0, 21.9) |
| urban                    | 16.9 (15.3, 18.4)                     | 14.3 (11.4, 17.2) | 16.0 (14.4, 17.5) | 18.4 (17.0, 19.8) | 18.9 (17.4, 20.3) | 19.4 (18.3, 20.4)                     | 16.8 (14.0, 19.4) | 18.5 (17.4, 19.6) | 20.9 (20.1, 21.8) | 21.4 (20.4, 22.4) |
| urban-rural difference   | 0.2 (-0.5, 0.8)                       | 0.3 (-0.6, 1.2)   | 0.2 (-0.5, 0.9)   | 0.2 (-0.5, 0.8)   | 0.1 (-0.6, 0.8)   | 0.5 (-0.1, 1.1)                       | 0.6 (-0.3, 1.4)   | 0.5 (-0.1, 1.1)   | 0.4 (-0.1, 1.0)   | 0.4 (-0.2, 1.0)   |
| <b>Myanmar</b>           |                                       |                   |                   |                   |                   |                                       |                   |                   |                   |                   |
| rural                    | 15.8 (14.2, 17.4)                     | 13.2 (10.2, 16.1) | 14.7 (13.0, 16.3) | 17.3 (15.8, 18.8) | 19.0 (17.4, 20.5) | 17.6 (16.2, 19.1)                     | 15.0 (12.2, 17.9) | 16.5 (15.0, 18.0) | 19.1 (17.8, 20.4) | 20.8 (19.4, 22.1) |
| urban                    | 16.1 (14.5, 17.7)                     | 13.6 (10.6, 16.6) | 15.0 (13.3, 16.6) | 17.6 (16.1, 19.1) | 19.2 (17.7, 20.8) | 18.2 (16.8, 19.7)                     | 15.7 (12.8, 18.6) | 17.1 (15.6, 18.7) | 19.7 (18.3, 21.1) | 21.3 (20.0, 22.8) |
| urban-rural difference   | 0.3 (-0.3, 1.0)                       | 0.4 (-0.5, 1.3)   | 0.3 (-0.3, 1.0)   | 0.3 (-0.3, 0.9)   | 0.3 (-0.4, 0.9)   | 0.6 (0.0, 1.2)                        | 0.7 (-0.2, 1.6)   | 0.6 (0.0, 1.3)    | 0.6 (0.0, 1.2)    | 0.6 (-0.1, 1.2)   |
| <b>Philippines</b>       |                                       |                   |                   |                   |                   |                                       |                   |                   |                   |                   |
| rural                    | 16.5 (15.5, 17.5)                     | 14.2 (13.2, 15.2) | 15.2 (14.2, 16.2) | 17.8 (16.8, 18.8) | 20.0 (19.1, 21.1) | 17.9 (17.3, 18.5)                     | 15.6 (15.0, 16.2) | 16.6 (16.0, 17.2) | 19.2 (18.6, 19.8) | 21.5 (20.9, 22.1) |
| urban                    | 16.7 (15.7, 17.7)                     | 14.5 (13.5, 15.5) | 15.4 (14.4, 16.4) | 17.9 (17.0, 19.0) | 20.1 (19.1, 21.2) | 18.4 (17.8, 19.0)                     | 16.2 (15.6, 16.8) | 17.1 (16.5, 17.7) | 19.7 (19.1, 20.3) | 21.9 (21.3, 22.5) |
| urban-rural difference   | 0.2 (-0.3, 0.6)                       | 0.3 (-0.2, 0.8)   | 0.2 (-0.2, 0.7)   | 0.1 (-0.3, 0.6)   | 0.1 (-0.4, 0.5)   | 0.5 (0.2, 0.9)                        | 0.6 (0.2, 1.0)    | 0.6 (0.2, 0.9)    | 0.5 (0.1, 0.8)    | 0.4 (0.0, 0.8)    |
| <b>Thailand</b>          |                                       |                   |                   |                   |                   |                                       |                   |                   |                   |                   |
| rural                    | 17.0 (16.4, 17.6)                     | 14.3 (13.7, 14.9) | 15.8 (15.2, 16.4) | 18.5 (17.9, 19.1) | 20.2 (19.5, 20.8) | 19.4 (18.9, 20.0)                     | 16.8 (16.2, 17.3) | 18.3 (17.7, 18.8) | 21.0 (20.4, 21.5) | 22.6 (22.0, 23.3) |
| urban                    | 17.5 (16.9, 18.1)                     | 14.9 (14.3, 15.6) | 16.4 (15.8, 17.0) | 19.0 (18.4, 19.6) | 20.6 (19.9, 21.3) | 20.2 (19.7, 20.8)                     | 17.7 (17.1, 18.3) | 19.1 (18.5, 19.7) | 21.7 (21.2, 22.2) | 23.3 (22.7, 23.9) |
| urban-rural difference   | 0.5 (0.2, 0.9)                        | 0.7 (0.2, 1.1)    | 0.6 (0.2, 1.0)    | 0.5 (0.1, 0.9)    | 0.4 (0.0, 0.9)    | 0.8 (0.4, 1.2)                        | 0.9 (0.4, 1.4)    | 0.8 (0.4, 1.2)    | 0.7 (0.3, 1.1)    | 0.7 (0.2, 1.1)    |
| <b>Timor-Leste</b>       |                                       |                   |                   |                   |                   |                                       |                   |                   |                   |                   |
| rural                    | 15.5 (14.1, 17.0)                     | 13.8 (12.4, 15.3) | 14.2 (12.8, 15.8) | 16.6 (15.2, 18.1) | 18.9 (17.4, 20.5) | 16.9 (16.2, 17.6)                     | 15.2 (14.4, 16.0) | 15.6 (14.9, 16.4) | 18.0 (17.3, 18.7) | 20.3 (19.5, 21.1) |
| urban                    | 15.6 (14.2, 17.2)                     | 14.0 (12.5, 15.8) | 14.4 (12.9, 16.0) | 16.7 (15.3, 18.2) | 18.9 (17.4, 20.5) | 17.3 (16.4, 18.1)                     | 15.7 (14.6, 16.8) | 16.0 (15.2, 16.9) | 18.3 (17.5, 19.2) | 20.5 (19.6, 21.5) |
| urban-rural difference   | 0.1 (-0.5, 0.8)                       | 0.3 (-0.6, 1.1)   | 0.2 (-0.5, 0.9)   | 0.1 (-0.5, 0.7)   | 0.0 (-0.7, 0.7)   | 0.4 (-0.1, 0.9)                       | 0.5 (-0.3, 1.3)   | 0.4 (-0.2, 1.0)   | 0.3 (-0.2, 0.8)   | 0.3 (-0.3, 0.8)   |
| <b>Viet Nam</b>          |                                       |                   |                   |                   |                   |                                       |                   |                   |                   |                   |
| rural                    | 15.8 (15.2, 16.3)                     | 14.1 (13.5, 14.6) | 14.5 (14.0, 15.1) | 17.0 (16.4, 17.5) | 18.8 (18.2, 19.4) | 17.8 (17.2, 18.4)                     | 16.0 (15.4, 16.7) | 16.5 (15.9, 17.1) | 18.9 (18.3, 19.5) | 20.8 (20.2, 21.4) |

| Boys                                          | Mean BMI in 1990 (kg/m <sup>2</sup> ) |                   |                   |                   |                   | Mean BMI in 2020 (kg/m <sup>2</sup> ) |                   |                   |                   |                   |
|-----------------------------------------------|---------------------------------------|-------------------|-------------------|-------------------|-------------------|---------------------------------------|-------------------|-------------------|-------------------|-------------------|
|                                               | Age-standardised                      | 5 years           | 10 years          | 15 years          | 19 years          | Age-standardised                      | 5 years           | 10 years          | 15 years          | 19 years          |
| urban                                         | 16.1 (15.5, 16.7)                     | 14.5 (13.9, 15.1) | 14.9 (14.3, 15.5) | 17.2 (16.6, 17.8) | 19.0 (18.4, 19.6) | 18.6 (17.9, 19.2)                     | 17.0 (16.3, 17.6) | 17.4 (16.7, 18.0) | 19.7 (19.1, 20.3) | 21.5 (20.8, 22.1) |
| urban-rural difference                        | 0.3 (-0.1, 0.7)                       | 0.4 (0.0, 0.8)    | 0.3 (-0.1, 0.7)   | 0.2 (-0.2, 0.6)   | 0.2 (-0.3, 0.6)   | 0.8 (0.4, 1.2)                        | 0.9 (0.5, 1.4)    | 0.8 (0.5, 1.3)    | 0.7 (0.4, 1.2)    | 0.7 (0.3, 1.1)    |
| <b>High-income Asia Pacific</b>               |                                       |                   |                   |                   |                   |                                       |                   |                   |                   |                   |
| <b>Japan</b>                                  |                                       |                   |                   |                   |                   |                                       |                   |                   |                   |                   |
| rural                                         | 18.6 (18.3, 18.8)                     | 15.4 (15.1, 15.6) | 17.5 (17.3, 17.8) | 20.4 (20.1, 20.6) | 21.2 (20.9, 21.5) | 18.7 (18.4, 19.0)                     | 15.5 (15.2, 15.8) | 17.7 (17.4, 18.0) | 20.5 (20.2, 20.8) | 21.4 (21.0, 21.7) |
| urban                                         | 18.6 (18.4, 18.9)                     | 15.5 (15.2, 15.7) | 17.6 (17.3, 17.8) | 20.4 (20.1, 20.6) | 21.2 (20.9, 21.5) | 18.7 (18.4, 19.0)                     | 15.6 (15.3, 15.9) | 17.7 (17.4, 18.0) | 20.5 (20.2, 20.8) | 21.3 (21.0, 21.7) |
| urban-rural difference                        | 0.0 (-0.1, 0.2)                       | 0.1 (-0.1, 0.3)   | 0.1 (-0.1, 0.2)   | 0.0 (-0.2, 0.2)   | 0.0 (-0.2, 0.2)   | 0.0 (-0.1, 0.2)                       | 0.1 (-0.1, 0.3)   | 0.0 (-0.1, 0.2)   | 0.0 (-0.2, 0.2)   | 0.0 (-0.2, 0.1)   |
| <b>Singapore</b>                              |                                       |                   |                   |                   |                   |                                       |                   |                   |                   |                   |
| rural                                         | 18.6 (16.7, 20.6)                     | 15.4 (12.0, 18.8) | 17.6 (15.5, 19.6) | 20.3 (18.4, 22.2) | 21.8 (19.7, 23.8) | 19.6 (17.8, 21.4)                     | 16.4 (13.2, 19.6) | 18.5 (16.7, 20.5) | 21.3 (19.6, 23.0) | 22.7 (21.0, 24.5) |
| urban                                         | 18.9 (17.0, 20.9)                     | 15.7 (12.3, 19.0) | 17.9 (15.8, 19.9) | 20.6 (18.7, 22.5) | 22.1 (20.1, 24.0) | 19.9 (18.2, 21.7)                     | 16.6 (13.4, 19.8) | 18.8 (17.0, 20.7) | 21.6 (20.0, 23.3) | 23.1 (21.5, 24.8) |
| urban-rural difference                        | 0.3 (-0.4, 1.0)                       | 0.3 (-0.6, 1.2)   | 0.3 (-0.4, 1.0)   | 0.3 (-0.3, 1.0)   | 0.3 (-0.4, 1.1)   | 0.3 (-0.3, 1.0)                       | 0.3 (-0.6, 1.2)   | 0.3 (-0.4, 1.0)   | 0.3 (-0.3, 1.0)   | 0.4 (-0.4, 1.1)   |
| <b>South Korea</b>                            |                                       |                   |                   |                   |                   |                                       |                   |                   |                   |                   |
| rural                                         | 18.3 (17.2, 19.4)                     | 14.7 (13.5, 15.8) | 17.6 (16.5, 18.7) | 20.0 (18.8, 21.1) | 21.0 (19.9, 22.1) | 19.7 (19.3, 20.0)                     | 16.1 (15.7, 16.4) | 19.0 (18.6, 19.3) | 21.4 (21.0, 21.7) | 22.4 (21.9, 22.8) |
| urban                                         | 18.7 (17.6, 19.7)                     | 14.7 (13.5, 15.8) | 17.8 (16.7, 18.9) | 20.5 (19.4, 21.6) | 21.8 (20.7, 22.9) | 20.2 (19.8, 20.5)                     | 16.2 (15.8, 16.5) | 19.3 (19.0, 19.7) | 22.0 (21.7, 22.4) | 23.3 (22.9, 23.7) |
| urban-rural difference                        | 0.4 (0.0, 0.7)                        | 0.0 (-0.5, 0.4)   | 0.3 (-0.1, 0.6)   | 0.6 (0.1, 0.9)    | 0.8 (0.3, 1.2)    | 0.5 (0.3, 0.7)                        | 0.1 (-0.2, 0.4)   | 0.4 (0.2, 0.6)    | 0.7 (0.4, 0.9)    | 0.9 (0.6, 1.2)    |
| <b>High-income western</b>                    |                                       |                   |                   |                   |                   |                                       |                   |                   |                   |                   |
| <i>High-income English-speaking countries</i> |                                       |                   |                   |                   |                   |                                       |                   |                   |                   |                   |
| <b>Australia</b>                              |                                       |                   |                   |                   |                   |                                       |                   |                   |                   |                   |
| rural                                         | 19.4 (18.5, 20.2)                     | 15.6 (14.6, 16.5) | 17.9 (17.0, 18.8) | 21.4 (20.5, 22.3) | 23.9 (22.9, 24.9) | 20.4 (19.9, 21.0)                     | 16.6 (16.0, 17.2) | 18.9 (18.4, 19.5) | 22.4 (21.9, 23.0) | 25.0 (24.3, 25.6) |
| urban                                         | 19.2 (18.4, 20.1)                     | 15.6 (14.7, 16.4) | 17.8 (16.9, 18.7) | 21.1 (20.3, 22.0) | 23.6 (22.7, 24.6) | 20.4 (19.9, 20.9)                     | 16.8 (16.2, 17.4) | 19.0 (18.4, 19.5) | 22.3 (21.8, 22.9) | 24.8 (24.2, 25.4) |
| urban-rural difference                        | -0.2 (-0.5, 0.3)                      | 0.0 (-0.4, 0.5)   | -0.1 (-0.5, 0.3)  | -0.2 (-0.6, 0.2)  | -0.3 (-0.8, 0.2)  | 0.0 (-0.3, 0.3)                       | 0.2 (-0.2, 0.5)   | 0.1 (-0.2, 0.3)   | -0.1 (-0.4, 0.2)  | -0.2 (-0.5, 0.2)  |
| <b>Canada</b>                                 |                                       |                   |                   |                   |                   |                                       |                   |                   |                   |                   |
| rural                                         | 18.7 (17.9, 19.4)                     | 14.6 (13.6, 15.6) | 17.3 (16.5, 18.1) | 20.9 (20.1, 21.6) | 22.6 (21.8, 23.3) | 19.7 (19.0, 20.4)                     | 15.6 (14.7, 16.5) | 18.3 (17.6, 19.1) | 21.9 (21.2, 22.6) | 23.6 (22.7, 24.4) |
| urban                                         | 18.6 (17.8, 19.3)                     | 14.4 (13.6, 15.2) | 17.2 (16.4, 17.9) | 20.8 (20.1, 21.5) | 22.6 (21.9, 23.3) | 19.8 (19.3, 20.4)                     | 15.6 (15.1, 16.2) | 18.4 (17.9, 19.0) | 22.0 (21.5, 22.6) | 23.8 (23.1, 24.5) |
| urban-rural difference                        | -0.1 (-0.7, 0.5)                      | -0.2 (-1.1, 0.7)  | -0.1 (-0.8, 0.5)  | -0.1 (-0.6, 0.5)  | 0.0 (-0.6, 0.6)   | 0.1 (-0.5, 0.7)                       | 0.0 (-0.8, 0.9)   | 0.1 (-0.5, 0.8)   | 0.2 (-0.4, 0.8)   | 0.2 (-0.4, 0.9)   |
| <b>Ireland</b>                                |                                       |                   |                   |                   |                   |                                       |                   |                   |                   |                   |
| rural                                         | 18.7 (17.4, 19.9)                     | 15.5 (14.2, 16.8) | 17.3 (16.0, 18.6) | 20.5 (19.2, 21.7) | 22.4 (21.0, 23.9) | 19.4 (19.0, 19.8)                     | 16.3 (15.8, 16.7) | 18.0 (17.6, 18.4) | 21.2 (20.7, 21.6) | 23.2 (22.3, 24.1) |
| urban                                         | 18.5 (17.3, 19.8)                     | 15.3 (14.1, 16.6) | 17.1 (15.9, 18.4) | 20.4 (19.1, 21.6) | 22.4 (21.0, 23.8) | 19.5 (19.1, 19.9)                     | 16.3 (15.8, 16.7) | 18.1 (17.7, 18.5) | 21.3 (20.9, 21.8) | 23.4 (22.5, 24.2) |
| urban-rural difference                        | -0.1 (-0.6, 0.3)                      | -0.2 (-0.7, 0.3)  | -0.2 (-0.6, 0.3)  | -0.1 (-0.6, 0.4)  | 0.0 (-0.6, 0.5)   | 0.1 (-0.2, 0.4)                       | 0.0 (-0.3, 0.3)   | 0.1 (-0.2, 0.4)   | 0.1 (-0.2, 0.5)   | 0.2 (-0.3, 0.7)   |
| <b>New Zealand</b>                            |                                       |                   |                   |                   |                   |                                       |                   |                   |                   |                   |
| rural                                         | 18.7 (18.0, 19.4)                     | 15.1 (14.4, 15.9) | 17.5 (16.7, 18.2) | 20.5 (19.8, 21.3) | 22.4 (21.7, 23.2) | 20.0 (19.6, 20.4)                     | 16.4 (16.0, 16.9) | 18.8 (18.4, 19.2) | 21.9 (21.4, 22.3) | 23.7 (23.2, 24.3) |
| urban                                         | 19.1 (18.4, 19.7)                     | 15.1 (14.4, 15.7) | 17.7 (17.1, 18.4) | 21.1 (20.5, 21.8) | 23.2 (22.6, 23.9) | 20.7 (20.3, 21.1)                     | 16.7 (16.3, 17.1) | 19.4 (19.0, 19.8) | 22.8 (22.4, 23.2) | 24.9 (24.4, 25.4) |
| urban-rural difference                        | 0.4 (-0.1, 0.8)                       | 0.0 (-0.6, 0.4)   | 0.3 (-0.2, 0.7)   | 0.6 (0.1, 1.0)    | 0.8 (0.3, 1.3)    | 0.7 (0.4, 1.0)                        | 0.3 (-0.1, 0.6)   | 0.6 (0.3, 0.9)    | 0.9 (0.6, 1.2)    | 1.1 (0.8, 1.6)    |
| <b>United Kingdom</b>                         |                                       |                   |                   |                   |                   |                                       |                   |                   |                   |                   |
| rural                                         | 18.8 (18.3, 19.3)                     | 15.5 (15.0, 15.9) | 17.5 (17.0, 18.0) | 20.6 (20.2, 21.1) | 22.7 (22.2, 23.1) | 19.5 (19.1, 20.0)                     | 16.2 (15.7, 16.6) | 18.2 (17.8, 18.7) | 21.4 (20.9, 21.8) | 23.4 (22.9, 23.8) |
| urban                                         | 18.8 (18.3, 19.3)                     | 15.4 (14.9, 15.8) | 17.5 (17.0, 18.0) | 20.7 (20.2, 21.1) | 22.7 (22.2, 23.2) | 19.8 (19.4, 20.2)                     | 16.4 (16.0, 16.8) | 18.5 (18.1, 18.9) | 21.6 (21.2, 22.1) | 23.7 (23.2, 24.1) |
| urban-rural difference                        | 0.0 (-0.3, 0.2)                       | -0.1 (-0.3, 0.2)  | 0.0 (-0.3, 0.2)   | 0.0 (-0.2, 0.2)   | 0.0 (-0.2, 0.3)   | 0.3 (0.1, 0.4)                        | 0.2 (0.0, 0.4)    | 0.2 (0.0, 0.4)    | 0.3 (0.1, 0.5)    | 0.3 (0.1, 0.5)    |
| <b>United States of America</b>               |                                       |                   |                   |                   |                   |                                       |                   |                   |                   |                   |
| rural                                         | 19.9 (19.4, 20.5)                     | 15.5 (14.9, 16.0) | 18.6 (18.1, 19.2) | 22.2 (21.6, 22.7) | 24.1 (23.5, 24.7) | 21.0 (20.5, 21.6)                     | 16.6 (16.0, 17.1) | 19.8 (19.2, 20.3) | 23.3 (22.7, 23.8) | 25.2 (24.6, 25.8) |
| urban                                         | 19.8 (19.2, 20.4)                     | 15.2 (14.7, 15.8) | 18.5 (17.9, 19.1) | 22.1 (21.5, 22.7) | 24.1 (23.5, 24.7) | 21.2 (20.6, 21.7)                     | 16.6 (16.1, 17.1) | 19.8 (19.3, 20.4) | 23.5 (22.9, 24.0) | 25.4 (24.8, 26.0) |
| urban-rural difference                        | -0.1 (-0.4, 0.2)                      | -0.2 (-0.5, 0.1)  | -0.1 (-0.4, 0.1)  | -0.1 (-0.4, 0.2)  | 0.0 (-0.4, 0.3)   | 0.1 (-0.1, 0.4)                       | 0.0 (-0.2, 0.3)   | 0.1 (-0.1, 0.3)   | 0.2 (-0.1, 0.4)   | 0.2 (-0.1, 0.6)   |
| <b>Northwestern Europe</b>                    |                                       |                   |                   |                   |                   |                                       |                   |                   |                   |                   |
| <b>Austria</b>                                |                                       |                   |                   |                   |                   |                                       |                   |                   |                   |                   |
| rural                                         | 18.7 (18.2, 19.1)                     | 14.8 (14.2, 15.3) | 17.4 (16.9, 17.9) | 20.7 (20.3, 21.2) | 22.2 (21.7, 22.8) | 19.8 (19.4, 20.3)                     | 15.9 (15.4, 16.4) | 18.6 (18.1, 19.0) | 21.9 (21.4, 22.4) | 23.4 (22.8, 23.9) |
| urban                                         | 18.9 (18.6, 19.3)                     | 14.7 (14.3, 15.2) | 17.6 (17.2, 18.0) | 21.1 (20.7, 21.5) | 22.8 (22.3, 23.2) | 20.1 (19.7, 20.5)                     | 15.9 (15.4, 16.4) | 18.7 (18.3, 19.2) | 22.3 (21.8, 22.7) | 23.9 (23.4, 24.4) |
| urban-rural difference                        | 0.3 (-0.3, 0.8)                       | 0.0 (-0.7, 0.5)   | 0.2 (-0.4, 0.7)   | 0.4 (-0.2, 0.9)   | 0.6 (-0.1, 1.2)   | 0.3 (-0.1, 0.6)                       | 0.0 (-0.4, 0.4)   | 0.2 (-0.2, 0.5)   | 0.4 (0.0, 0.8)    | 0.6 (0.1, 1.0)    |
| <b>Belgium</b>                                |                                       |                   |                   |                   |                   |                                       |                   |                   |                   |                   |
| rural                                         | 18.2 (16.9, 19.4)                     | 15.1 (13.7, 16.4) | 17.1 (15.8, 18.3) | 20.1 (18.9, 21.2) | 20.5 (19.3, 21.8) | 19.3 (18.4, 20.3)                     | 16.2 (15.1, 17.4) | 18.2 (17.2, 19.2) | 21.2 (20.2, 22.2) | 21.7 (20.6, 22.8) |
| urban                                         | 18.0 (16.8, 19.2)                     | 14.8 (13.5, 16.0) | 16.9 (15.6, 18.1) | 20.0 (18.7, 21.2) | 20.6 (19.2, 21.9) | 19.1 (18.2, 19.9)                     | 15.8 (14.9, 16.7) | 17.9 (17.1, 18.8) | 21.0 (20.2, 21.9) | 21.6 (20.6, 22.6) |
| urban-rural difference                        | -0.1 (-0.8, 0.5)                      | -0.3 (-1.1, 0.5)  | -0.2 (-0.8, 0.5)  | -0.1 (-0.7, 0.5)  | 0.0 (-0.6, 0.7)   | -0.3 (-0.8, 0.3)                      | -0.4 (-1.2, 0.4)  | -0.3 (-0.9, 0.3)  | -0.2 (-0.8, 0.4)  | -0.1 (-0.7, 0.5)  |
| <b>Denmark</b>                                |                                       |                   |                   |                   |                   |                                       |                   |                   |                   |                   |

| Boys                       | Mean BMI in 1990 (kg/m <sup>2</sup> ) |                   |                   |                   |                   | Mean BMI in 2020 (kg/m <sup>2</sup> ) |                   |                   |                   |                   |
|----------------------------|---------------------------------------|-------------------|-------------------|-------------------|-------------------|---------------------------------------|-------------------|-------------------|-------------------|-------------------|
|                            | Age-standardised                      | 5 years           | 10 years          | 15 years          | 19 years          | Age-standardised                      | 5 years           | 10 years          | 15 years          | 19 years          |
| rural                      | 19.2 (18.4, 20.0)                     | 15.7 (14.8, 16.6) | 17.8 (16.9, 18.6) | 21.0 (20.1, 21.8) | 23.5 (22.7, 24.4) | 19.4 (18.9, 19.9)                     | 15.9 (15.4, 16.4) | 17.9 (17.5, 18.4) | 21.1 (20.7, 21.6) | 23.7 (23.2, 24.2) |
| urban                      | 19.1 (18.4, 19.8)                     | 15.7 (14.9, 16.4) | 17.7 (17.0, 18.4) | 20.8 (20.1, 21.6) | 23.4 (22.6, 24.1) | 19.2 (18.7, 19.6)                     | 15.7 (15.3, 16.2) | 17.7 (17.3, 18.2) | 20.9 (20.4, 21.3) | 23.4 (23.0, 23.8) |
| urban-rural difference     | -0.1 (-0.5, 0.4)                      | 0.0 (-0.6, 0.5)   | -0.1 (-0.5, 0.4)  | -0.1 (-0.6, 0.3)  | -0.2 (-0.6, 0.3)  | -0.2 (-0.5, 0.0)                      | -0.2 (-0.6, 0.2)  | -0.2 (-0.5, 0.1)  | -0.3 (-0.6, 0.0)  | -0.3 (-0.6, 0.0)  |
| <b>Finland</b>             |                                       |                   |                   |                   |                   |                                       |                   |                   |                   |                   |
| rural                      | 19.0 (17.6, 20.3)                     | 14.9 (13.5, 16.2) | 17.6 (16.3, 19.0) | 21.0 (19.7, 22.3) | 23.1 (21.4, 24.6) | 20.2 (19.6, 20.8)                     | 16.2 (15.5, 16.8) | 18.9 (18.3, 19.5) | 22.3 (21.6, 22.9) | 24.3 (23.2, 25.4) |
| urban                      | 18.9 (17.6, 20.2)                     | 15.0 (13.6, 16.2) | 17.6 (16.2, 18.8) | 20.9 (19.5, 22.1) | 22.8 (21.3, 24.4) | 20.0 (19.4, 20.5)                     | 16.0 (15.5, 16.6) | 18.7 (18.1, 19.2) | 21.9 (21.4, 22.5) | 23.9 (22.9, 25.0) |
| urban-rural difference     | -0.1 (-0.7, 0.5)                      | 0.0 (-0.6, 0.7)   | -0.1 (-0.6, 0.5)  | -0.2 (-0.7, 0.4)  | -0.2 (-0.8, 0.4)  | -0.3 (-0.7, 0.1)                      | -0.1 (-0.6, 0.3)  | -0.2 (-0.6, 0.2)  | -0.3 (-0.7, 0.1)  | -0.4 (-0.8, 0.1)  |
| <b>Germany</b>             |                                       |                   |                   |                   |                   |                                       |                   |                   |                   |                   |
| rural                      | 18.9 (18.2, 19.6)                     | 14.8 (14.0, 15.6) | 17.6 (16.8, 18.3) | 20.9 (20.2, 21.6) | 22.8 (22.2, 23.4) | 19.6 (18.8, 20.4)                     | 15.5 (14.7, 16.3) | 18.3 (17.5, 19.1) | 21.6 (20.8, 22.4) | 23.6 (22.7, 24.4) |
| urban                      | 18.8 (18.2, 19.4)                     | 14.9 (14.2, 15.6) | 17.6 (16.9, 18.2) | 20.8 (20.1, 21.4) | 22.6 (22.1, 23.1) | 19.5 (18.8, 20.2)                     | 15.5 (14.8, 16.3) | 18.2 (17.5, 18.9) | 21.4 (20.7, 22.2) | 23.3 (22.5, 24.1) |
| urban-rural difference     | -0.1 (-0.6, 0.4)                      | 0.1 (-0.5, 0.7)   | 0.0 (-0.5, 0.5)   | -0.1 (-0.6, 0.4)  | -0.2 (-0.8, 0.4)  | -0.1 (-0.5, 0.3)                      | 0.0 (-0.5, 0.5)   | -0.1 (-0.5, 0.4)  | -0.2 (-0.6, 0.3)  | -0.3 (-0.8, 0.3)  |
| <b>Greenland</b>           |                                       |                   |                   |                   |                   |                                       |                   |                   |                   |                   |
| rural                      | 18.2 (16.5, 19.9)                     | 14.7 (11.8, 17.6) | 16.9 (15.2, 18.7) | 20.0 (18.4, 21.6) | 21.9 (20.3, 23.5) | 19.0 (17.4, 20.7)                     | 15.5 (12.6, 18.4) | 17.7 (16.0, 19.5) | 20.8 (19.3, 22.4) | 22.7 (21.1, 24.3) |
| urban                      | 18.2 (16.5, 19.9)                     | 14.7 (11.8, 17.6) | 16.9 (15.2, 18.7) | 20.0 (18.4, 21.7) | 21.9 (20.2, 23.6) | 18.9 (17.3, 20.5)                     | 15.4 (12.6, 18.3) | 17.7 (16.0, 19.4) | 20.8 (19.2, 22.3) | 22.6 (21.1, 24.3) |
| urban-rural difference     | 0.0 (-0.7, 0.7)                       | 0.0 (-0.9, 0.9)   | 0.0 (-0.7, 0.7)   | 0.0 (-0.7, 0.7)   | 0.0 (-0.7, 0.7)   | -0.1 (-0.7, 0.5)                      | -0.1 (-1.0, 0.8)  | -0.1 (-0.7, 0.6)  | -0.1 (-0.7, 0.5)  | -0.1 (-0.8, 0.6)  |
| <b>Iceland</b>             |                                       |                   |                   |                   |                   |                                       |                   |                   |                   |                   |
| rural                      | 18.6 (16.4, 20.8)                     | 15.1 (11.9, 18.2) | 17.4 (15.2, 19.5) | 20.5 (18.3, 22.6) | 22.2 (19.6, 24.7) | 19.4 (17.2, 21.6)                     | 15.9 (12.7, 19.1) | 18.2 (16.0, 20.4) | 21.3 (19.2, 23.4) | 23.0 (20.4, 25.5) |
| urban                      | 18.6 (16.4, 20.8)                     | 15.1 (11.9, 18.2) | 17.4 (15.2, 19.6) | 20.5 (18.3, 22.6) | 22.2 (19.6, 24.7) | 19.4 (17.1, 21.6)                     | 15.8 (12.6, 19.0) | 18.1 (15.9, 20.3) | 21.2 (19.1, 23.4) | 22.9 (20.3, 25.4) |
| urban-rural difference     | 0.0 (-0.6, 0.7)                       | 0.0 (-0.9, 0.9)   | 0.0 (-0.7, 0.7)   | 0.0 (-0.6, 0.7)   | 0.0 (-0.7, 0.8)   | -0.1 (-0.7, 0.6)                      | -0.1 (-0.9, 0.8)  | -0.1 (-0.7, 0.6)  | 0.0 (-0.6, 0.6)   | 0.0 (-0.7, 0.7)   |
| <b>Luxembourg</b>          |                                       |                   |                   |                   |                   |                                       |                   |                   |                   |                   |
| rural                      | 18.4 (16.6, 20.1)                     | 14.8 (11.9, 17.7) | 17.2 (15.4, 19.0) | 20.3 (18.6, 21.9) | 21.6 (19.9, 23.2) | 19.2 (17.5, 20.8)                     | 15.6 (12.6, 18.5) | 18.0 (16.2, 19.8) | 21.1 (19.5, 22.7) | 22.4 (20.8, 24.0) |
| urban                      | 18.4 (16.7, 20.2)                     | 14.8 (11.8, 17.7) | 17.2 (15.4, 19.1) | 20.3 (18.7, 22.0) | 21.7 (20.0, 23.4) | 19.1 (17.5, 20.9)                     | 15.5 (12.6, 18.4) | 17.9 (16.2, 19.8) | 21.1 (19.4, 22.7) | 22.4 (20.8, 23.9) |
| urban-rural difference     | 0.0 (-0.6, 0.7)                       | 0.0 (-0.9, 0.9)   | 0.0 (-0.7, 0.7)   | 0.1 (-0.6, 0.7)   | 0.1 (-0.6, 0.8)   | 0.0 (-0.6, 0.6)                       | -0.1 (-0.9, 0.8)  | 0.0 (-0.7, 0.6)   | 0.0 (-0.6, 0.6)   | 0.0 (-0.7, 0.7)   |
| <b>Netherlands</b>         |                                       |                   |                   |                   |                   |                                       |                   |                   |                   |                   |
| rural                      | 18.1 (16.9, 19.3)                     | 15.2 (13.8, 16.6) | 16.9 (15.7, 18.1) | 19.6 (18.4, 20.9) | 21.4 (20.0, 22.9) | 18.7 (17.8, 19.7)                     | 15.9 (14.7, 17.0) | 17.5 (16.6, 18.5) | 20.3 (19.3, 21.3) | 22.1 (20.8, 23.4) |
| urban                      | 18.2 (17.0, 19.4)                     | 15.4 (14.0, 16.8) | 17.0 (15.8, 18.2) | 19.7 (18.6, 20.9) | 21.5 (20.2, 22.9) | 18.8 (17.8, 19.8)                     | 16.0 (14.8, 17.2) | 17.6 (16.6, 18.6) | 20.3 (19.4, 21.3) | 22.1 (20.9, 23.3) |
| urban-rural difference     | 0.1 (-0.4, 0.6)                       | 0.2 (-0.5, 0.8)   | 0.1 (-0.4, 0.7)   | 0.1 (-0.4, 0.6)   | 0.1 (-0.6, 0.7)   | 0.1 (-0.4, 0.5)                       | 0.1 (-0.5, 0.7)   | 0.1 (-0.4, 0.5)   | 0.0 (-0.4, 0.5)   | 0.0 (-0.6, 0.6)   |
| <b>Norway</b>              |                                       |                   |                   |                   |                   |                                       |                   |                   |                   |                   |
| rural                      | 18.6 (17.4, 19.8)                     | 15.9 (14.4, 17.4) | 17.4 (16.2, 18.5) | 20.1 (18.9, 21.3) | 21.9 (20.7, 23.2) | 19.1 (18.1, 20.1)                     | 16.4 (15.2, 17.7) | 17.9 (16.9, 18.9) | 20.6 (19.6, 21.6) | 22.4 (21.3, 23.5) |
| urban                      | 18.5 (17.3, 19.7)                     | 15.6 (14.1, 17.0) | 17.2 (16.0, 18.4) | 20.0 (18.8, 21.3) | 22.0 (20.7, 23.3) | 18.9 (18.0, 19.8)                     | 16.0 (14.9, 17.1) | 17.6 (16.7, 18.5) | 20.5 (19.5, 21.4) | 22.4 (21.3, 23.5) |
| urban-rural difference     | -0.1 (-0.7, 0.4)                      | -0.3 (-1.0, 0.4)  | -0.2 (-0.7, 0.4)  | 0.0 (-0.6, 0.5)   | 0.1 (-0.5, 0.7)   | -0.2 (-0.7, 0.3)                      | -0.4 (-1.2, 0.3)  | -0.3 (-0.8, 0.3)  | -0.1 (-0.7, 0.4)  | 0.0 (-0.6, 0.6)   |
| <b>Sweden</b>              |                                       |                   |                   |                   |                   |                                       |                   |                   |                   |                   |
| rural                      | 19.0 (18.7, 19.3)                     | 15.5 (14.9, 16.2) | 17.8 (17.4, 18.2) | 21.0 (20.7, 21.2) | 22.1 (21.7, 22.4) | 19.8 (19.1, 20.5)                     | 16.3 (15.5, 17.1) | 18.6 (17.9, 19.2) | 21.8 (21.1, 22.5) | 22.9 (22.1, 23.6) |
| urban                      | 18.7 (18.5, 18.9)                     | 15.3 (14.9, 15.7) | 17.5 (17.3, 17.8) | 20.7 (20.4, 20.9) | 21.7 (21.3, 22.1) | 19.4 (18.9, 20.0)                     | 16.0 (15.4, 16.7) | 18.2 (17.7, 18.8) | 21.4 (20.7, 22.0) | 22.4 (21.7, 23.1) |
| urban-rural difference     | -0.3 (-0.6, 0.0)                      | -0.2 (-0.8, 0.4)  | -0.3 (-0.7, 0.1)  | -0.3 (-0.6, -0.1) | -0.4 (-0.6, -0.1) | -0.4 (-0.8, 0.1)                      | -0.3 (-0.9, 0.4)  | -0.3 (-0.8, 0.1)  | -0.4 (-0.8, 0.0)  | -0.4 (-0.9, 0.0)  |
| <b>Switzerland</b>         |                                       |                   |                   |                   |                   |                                       |                   |                   |                   |                   |
| rural                      | 18.5 (17.3, 19.7)                     | 15.0 (13.8, 16.2) | 17.2 (16.1, 18.4) | 20.2 (19.0, 21.4) | 22.5 (21.3, 23.7) | 19.2 (18.6, 19.8)                     | 15.7 (15.0, 16.3) | 17.9 (17.3, 18.5) | 20.8 (20.2, 21.5) | 23.2 (22.6, 23.8) |
| urban                      | 18.6 (17.4, 19.8)                     | 15.1 (13.9, 16.3) | 17.3 (16.1, 18.6) | 20.3 (19.1, 21.5) | 22.6 (21.4, 23.8) | 19.2 (18.6, 19.8)                     | 15.7 (15.0, 16.3) | 17.9 (17.3, 18.5) | 20.8 (20.2, 21.5) | 23.2 (22.6, 23.8) |
| urban-rural difference     | 0.1 (-0.3, 0.6)                       | 0.1 (-0.4, 0.6)   | 0.1 (-0.3, 0.6)   | 0.1 (-0.4, 0.6)   | 0.1 (-0.4, 0.6)   | 0.0 (-0.3, 0.3)                       | 0.0 (-0.4, 0.4)   | 0.0 (-0.3, 0.3)   | 0.0 (-0.3, 0.3)   | 0.0 (-0.3, 0.3)   |
| <b>Southwestern Europe</b> |                                       |                   |                   |                   |                   |                                       |                   |                   |                   |                   |
| <b>Andorra</b>             |                                       |                   |                   |                   |                   |                                       |                   |                   |                   |                   |
| rural                      | 19.2 (17.0, 21.3)                     | 15.4 (12.2, 18.6) | 18.1 (15.9, 20.2) | 21.0 (18.9, 23.1) | 22.7 (20.1, 25.3) | 19.7 (17.5, 21.9)                     | 15.9 (12.7, 19.2) | 18.6 (16.5, 20.8) | 21.5 (19.4, 23.7) | 23.2 (20.6, 25.8) |
| urban                      | 19.2 (17.0, 21.3)                     | 15.5 (12.3, 18.8) | 18.1 (16.0, 20.3) | 21.0 (18.9, 23.1) | 22.6 (20.0, 25.2) | 19.7 (17.6, 21.9)                     | 16.1 (12.8, 19.4) | 18.7 (16.5, 20.9) | 21.5 (19.5, 23.7) | 23.1 (20.6, 25.8) |
| urban-rural difference     | 0.0 (-0.6, 0.7)                       | 0.1 (-0.8, 1.0)   | 0.1 (-0.6, 0.7)   | 0.0 (-0.7, 0.6)   | -0.1 (-0.8, 0.6)  | 0.1 (-0.6, 0.7)                       | 0.2 (-0.7, 1.0)   | 0.1 (-0.6, 0.8)   | 0.0 (-0.6, 0.7)   | -0.1 (-0.7, 0.7)  |
| <b>Cyprus</b>              |                                       |                   |                   |                   |                   |                                       |                   |                   |                   |                   |
| rural                      | 19.8 (18.5, 21.1)                     | 15.4 (13.9, 16.8) | 18.7 (17.3, 20.0) | 21.8 (20.5, 23.2) | 23.7 (21.9, 25.5) | 20.3 (19.6, 21.0)                     | 15.9 (15.1, 16.8) | 19.2 (18.5, 19.9) | 22.4 (21.6, 23.2) | 24.2 (22.7, 25.8) |
| urban                      | 19.7 (18.4, 21.0)                     | 15.5 (14.2, 16.9) | 18.7 (17.4, 20.0) | 21.7 (20.4, 23.0) | 23.4 (21.6, 25.2) | 20.3 (19.7, 20.9)                     | 16.1 (15.4, 16.8) | 19.2 (18.6, 19.8) | 22.3 (21.6, 23.0) | 24.0 (22.6, 25.5) |
| urban-rural difference     | 0.0 (-0.6, 0.5)                       | 0.1 (-0.6, 0.9)   | 0.0 (-0.6, 0.6)   | -0.1 (-0.7, 0.4)  | -0.2 (-0.9, 0.4)  | 0.0 (-0.5, 0.4)                       | 0.2 (-0.5, 0.8)   | 0.0 (-0.5, 0.5)   | -0.1 (-0.6, 0.4)  | -0.2 (-0.9, 0.4)  |
| <b>France</b>              |                                       |                   |                   |                   |                   |                                       |                   |                   |                   |                   |
| rural                      | 18.1 (16.9, 19.4)                     | 14.9 (13.6, 16.1) | 17.0 (15.8, 18.3) | 19.9 (18.6, 21.2) | 21.2 (19.9, 22.6) | 18.4 (17.8, 19.1)                     | 15.1 (14.4, 15.9) | 17.3 (16.6, 18.0) | 20.1 (19.5, 20.8) | 21.5 (20.8, 22.3) |
| urban                      | 18.3 (17.1, 19.6)                     | 14.9 (13.7, 16.2) | 17.2 (16.0, 18.5) | 20.1 (18.9, 21.4) | 21.6 (20.3, 22.9) | 18.6 (18.0, 19.2)                     | 15.2 (14.5, 15.9) | 17.5 (16.8, 18.1) | 20.4 (19.8, 21.1) | 21.9 (21.2, 22.5) |

| Boys                               | Mean BMI in 1990 (kg/m <sup>2</sup> ) |                   |                   |                   |                   | Mean BMI in 2020 (kg/m <sup>2</sup> ) |                   |                   |                   |                   |
|------------------------------------|---------------------------------------|-------------------|-------------------|-------------------|-------------------|---------------------------------------|-------------------|-------------------|-------------------|-------------------|
|                                    | Age-standardised                      | 5 years           | 10 years          | 15 years          | 19 years          | Age-standardised                      | 5 years           | 10 years          | 15 years          | 19 years          |
| urban-rural difference             | 0.2 (-0.3, 0.7)                       | 0.1 (-0.5, 0.7)   | 0.2 (-0.3, 0.7)   | 0.3 (-0.2, 0.8)   | 0.4 (-0.2, 0.9)   | 0.2 (-0.2, 0.6)                       | 0.1 (-0.4, 0.6)   | 0.2 (-0.2, 0.6)   | 0.3 (-0.1, 0.7)   | 0.4 (-0.2, 0.9)   |
| <b>Greece</b>                      |                                       |                   |                   |                   |                   |                                       |                   |                   |                   |                   |
| rural                              | 19.5 (18.5, 20.5)                     | 15.2 (14.2, 16.2) | 18.5 (17.5, 19.5) | 21.5 (20.5, 22.5) | 23.0 (21.9, 24.1) | 20.3 (19.7, 20.8)                     | 16.0 (15.3, 16.6) | 19.3 (18.7, 19.8) | 22.3 (21.7, 22.9) | 23.8 (23.1, 24.5) |
| urban                              | 19.4 (18.5, 20.4)                     | 15.2 (14.2, 16.2) | 18.4 (17.5, 19.4) | 21.4 (20.5, 22.5) | 22.9 (21.9, 24.0) | 20.1 (19.6, 20.7)                     | 15.9 (15.3, 16.5) | 19.2 (18.6, 19.7) | 22.2 (21.6, 22.7) | 23.6 (22.9, 24.3) |
| urban-rural difference             | -0.1 (-0.4, 0.3)                      | 0.0 (-0.4, 0.4)   | 0.0 (-0.4, 0.3)   | -0.1 (-0.5, 0.3)  | -0.1 (-0.6, 0.4)  | -0.1 (-0.4, 0.2)                      | -0.1 (-0.4, 0.3)  | -0.1 (-0.4, 0.2)  | -0.2 (-0.5, 0.2)  | -0.2 (-0.7, 0.2)  |
| <b>Israel</b>                      |                                       |                   |                   |                   |                   |                                       |                   |                   |                   |                   |
| rural                              | 18.6 (18.0, 19.2)                     | 14.1 (12.8, 15.5) | 17.7 (17.1, 18.4) | 20.8 (20.3, 21.2) | 21.8 (21.3, 22.3) | 19.8 (19.2, 20.4)                     | 15.3 (14.2, 16.4) | 18.9 (18.2, 19.5) | 21.9 (21.3, 22.6) | 23.0 (22.3, 23.6) |
| urban                              | 18.6 (18.0, 19.1)                     | 14.0 (12.8, 15.2) | 17.6 (17.0, 18.2) | 20.8 (20.3, 21.2) | 21.9 (21.4, 22.4) | 19.8 (19.3, 20.3)                     | 15.2 (14.2, 16.1) | 18.8 (18.3, 19.4) | 22.0 (21.4, 22.6) | 23.1 (22.5, 23.7) |
| urban-rural difference             | -0.1 (-0.5, 0.4)                      | -0.2 (-0.9, 0.6)  | -0.1 (-0.6, 0.4)  | 0.0 (-0.3, 0.3)   | 0.1 (-0.3, 0.4)   | 0.0 (-0.4, 0.4)                       | -0.1 (-0.8, 0.6)  | 0.0 (-0.5, 0.5)   | 0.1 (-0.3, 0.4)   | 0.1 (-0.2, 0.5)   |
| <b>Italy</b>                       |                                       |                   |                   |                   |                   |                                       |                   |                   |                   |                   |
| rural                              | 19.8 (19.0, 20.6)                     | 16.8 (15.8, 17.8) | 18.8 (18.0, 19.6) | 21.3 (20.5, 22.1) | 23.2 (22.2, 24.2) | 19.6 (19.0, 20.2)                     | 16.6 (15.8, 17.4) | 18.6 (18.0, 19.1) | 21.1 (20.4, 21.7) | 22.9 (22.1, 23.8) |
| urban                              | 19.7 (18.9, 20.5)                     | 17.1 (16.1, 18.1) | 18.8 (18.0, 19.6) | 21.0 (20.2, 21.8) | 22.6 (21.6, 23.6) | 19.5 (18.9, 20.0)                     | 16.9 (16.2, 17.6) | 18.6 (18.0, 19.1) | 20.8 (20.2, 21.4) | 22.4 (21.6, 23.1) |
| urban-rural difference             | -0.1 (-0.5, 0.3)                      | 0.3 (-0.2, 0.9)   | 0.0 (-0.4, 0.5)   | -0.3 (-0.8, 0.2)  | -0.6 (-1.2, 0.0)  | -0.1 (-0.4, 0.2)                      | 0.3 (-0.1, 0.7)   | 0.0 (-0.3, 0.3)   | -0.3 (-0.7, 0.1)  | -0.6 (-1.1, 0.0)  |
| <b>Malta</b>                       |                                       |                   |                   |                   |                   |                                       |                   |                   |                   |                   |
| rural                              | 18.9 (17.5, 20.4)                     | 15.5 (14.0, 17.1) | 17.8 (16.4, 19.2) | 20.7 (19.1, 22.3) | 22.5 (20.5, 24.7) | 19.3 (18.5, 20.2)                     | 16.0 (14.9, 17.0) | 18.2 (17.4, 19.0) | 21.1 (20.0, 22.2) | 23.0 (21.1, 24.9) |
| urban                              | 19.2 (17.8, 20.6)                     | 16.0 (14.6, 17.5) | 18.1 (16.7, 19.5) | 20.8 (19.2, 22.4) | 22.5 (20.5, 24.6) | 19.7 (18.9, 20.5)                     | 16.6 (15.6, 17.5) | 18.6 (17.9, 19.3) | 21.3 (20.3, 22.4) | 23.0 (21.3, 24.9) |
| urban-rural difference             | 0.3 (-0.4, 0.8)                       | 0.5 (-0.3, 1.2)   | 0.3 (-0.3, 0.9)   | 0.1 (-0.5, 0.8)   | 0.0 (-0.7, 0.7)   | 0.3 (-0.2, 0.9)                       | 0.6 (0.0, 1.2)    | 0.4 (-0.1, 0.9)   | 0.2 (-0.3, 0.8)   | 0.1 (-0.7, 0.8)   |
| <b>Portugal</b>                    |                                       |                   |                   |                   |                   |                                       |                   |                   |                   |                   |
| rural                              | 18.9 (18.5, 19.2)                     | 15.5 (15.0, 16.0) | 17.8 (17.4, 18.2) | 20.6 (20.2, 20.9) | 22.3 (22.0, 22.6) | 19.4 (18.8, 19.9)                     | 16.0 (15.4, 16.5) | 18.3 (17.8, 18.8) | 21.1 (20.5, 21.6) | 22.8 (22.2, 23.5) |
| urban                              | 18.9 (18.5, 19.2)                     | 15.6 (15.2, 16.1) | 17.9 (17.5, 18.3) | 20.5 (20.1, 20.8) | 22.1 (21.9, 22.4) | 19.4 (18.8, 19.9)                     | 16.1 (15.6, 16.7) | 18.4 (17.8, 18.9) | 21.0 (20.4, 21.5) | 22.6 (22.0, 23.3) |
| urban-rural difference             | 0.0 (-0.3, 0.3)                       | 0.2 (-0.3, 0.6)   | 0.1 (-0.3, 0.4)   | -0.1 (-0.3, 0.2)  | -0.2 (-0.4, 0.0)  | 0.0 (-0.3, 0.3)                       | 0.2 (-0.1, 0.5)   | 0.0 (-0.2, 0.3)   | -0.1 (-0.4, 0.2)  | -0.2 (-0.6, 0.2)  |
| <b>Spain</b>                       |                                       |                   |                   |                   |                   |                                       |                   |                   |                   |                   |
| rural                              | 20.8 (19.8, 22.0)                     | 16.9 (15.7, 18.1) | 19.8 (18.7, 21.0) | 22.6 (21.6, 23.8) | 24.4 (23.3, 25.6) | 20.1 (19.6, 20.6)                     | 16.2 (15.7, 16.7) | 19.1 (18.7, 19.6) | 21.9 (21.4, 22.4) | 23.7 (23.0, 24.4) |
| urban                              | 20.7 (19.6, 21.8)                     | 17.0 (15.9, 18.2) | 19.8 (18.7, 20.9) | 22.4 (21.4, 23.6) | 24.1 (23.0, 25.2) | 20.0 (19.6, 20.5)                     | 16.3 (15.8, 16.8) | 19.1 (18.7, 19.6) | 21.8 (21.3, 22.3) | 23.4 (22.7, 24.0) |
| urban-rural difference             | -0.1 (-0.6, 0.3)                      | 0.1 (-0.4, 0.6)   | 0.0 (-0.5, 0.4)   | -0.2 (-0.7, 0.2)  | -0.3 (-0.9, 0.2)  | -0.1 (-0.3, 0.2)                      | 0.2 (-0.2, 0.5)   | 0.0 (-0.3, 0.3)   | -0.2 (-0.5, 0.2)  | -0.3 (-0.8, 0.2)  |
| <b>Latin America and Caribbean</b> |                                       |                   |                   |                   |                   |                                       |                   |                   |                   |                   |
| <i>Andean Latin America</i>        |                                       |                   |                   |                   |                   |                                       |                   |                   |                   |                   |
| <b>Bolivia</b>                     |                                       |                   |                   |                   |                   |                                       |                   |                   |                   |                   |
| rural                              | 18.4 (16.7, 20.1)                     | 15.6 (12.6, 18.6) | 17.4 (15.7, 19.1) | 19.9 (18.2, 21.5) | 21.2 (19.5, 23.0) | 20.5 (19.3, 21.6)                     | 17.7 (15.0, 20.5) | 19.5 (18.3, 20.7) | 22.0 (21.0, 22.9) | 23.3 (22.3, 24.3) |
| urban                              | 18.8 (17.1, 20.6)                     | 16.3 (13.3, 19.3) | 17.9 (16.1, 19.6) | 20.2 (18.6, 21.9) | 21.5 (19.7, 23.2) | 21.2 (20.1, 22.3)                     | 18.6 (15.9, 21.3) | 20.2 (19.1, 21.4) | 22.6 (21.6, 23.6) | 23.8 (22.8, 24.9) |
| urban-rural difference             | 0.5 (-0.2, 1.1)                       | 0.6 (-0.3, 1.6)   | 0.5 (-0.2, 1.2)   | 0.4 (-0.3, 1.0)   | 0.3 (-0.5, 0.9)   | 0.7 (0.1, 1.3)                        | 0.9 (0.0, 1.8)    | 0.8 (0.1, 1.4)    | 0.6 (0.1, 1.2)    | 0.5 (-0.1, 1.1)   |
| <b>Ecuador</b>                     |                                       |                   |                   |                   |                   |                                       |                   |                   |                   |                   |
| rural                              | 17.9 (16.3, 19.5)                     | 14.8 (13.2, 16.4) | 16.9 (15.3, 18.5) | 19.5 (17.9, 21.1) | 21.3 (19.6, 22.8) | 19.8 (19.1, 20.4)                     | 16.7 (16.0, 17.4) | 18.8 (18.1, 19.4) | 21.4 (20.7, 22.0) | 23.1 (22.4, 23.8) |
| urban                              | 18.3 (16.8, 19.9)                     | 15.2 (13.6, 16.8) | 17.3 (15.7, 18.9) | 19.9 (18.4, 21.5) | 21.7 (20.1, 23.3) | 20.4 (19.7, 21.0)                     | 17.2 (16.5, 17.9) | 19.3 (18.7, 20.0) | 21.9 (21.3, 22.6) | 23.7 (23.0, 24.4) |
| urban-rural difference             | 0.4 (-0.3, 1.1)                       | 0.4 (-0.4, 1.1)   | 0.4 (-0.3, 1.1)   | 0.4 (-0.3, 1.1)   | 0.4 (-0.3, 1.1)   | 0.6 (0.2, 1.0)                        | 0.6 (0.1, 1.0)    | 0.6 (0.1, 1.0)    | 0.6 (0.2, 1.0)    | 0.6 (0.1, 1.1)    |
| <b>Peru</b>                        |                                       |                   |                   |                   |                   |                                       |                   |                   |                   |                   |
| rural                              | 17.5 (16.0, 19.0)                     | 14.5 (13.0, 16.1) | 16.2 (14.7, 17.7) | 19.0 (17.5, 20.5) | 21.3 (19.8, 22.8) | 19.3 (18.9, 19.7)                     | 16.4 (15.9, 16.8) | 18.0 (17.6, 18.5) | 20.9 (20.5, 21.3) | 23.1 (22.7, 23.5) |
| urban                              | 18.3 (16.7, 19.7)                     | 15.6 (14.0, 17.1) | 17.1 (15.5, 18.6) | 19.7 (18.2, 21.2) | 21.8 (20.3, 23.3) | 20.4 (20.0, 20.8)                     | 17.7 (17.2, 18.2) | 19.2 (18.8, 19.7) | 21.9 (21.5, 22.3) | 24.0 (23.6, 24.4) |
| urban-rural difference             | 0.8 (0.2, 1.4)                        | 1.0 (0.3, 1.7)    | 0.9 (0.2, 1.5)    | 0.7 (0.0, 1.3)    | 0.6 (-0.1, 1.2)   | 1.1 (0.8, 1.4)                        | 1.3 (0.9, 1.8)    | 1.2 (0.9, 1.5)    | 1.0 (0.7, 1.3)    | 0.9 (0.6, 1.2)    |
| <b>Caribbean</b>                   |                                       |                   |                   |                   |                   |                                       |                   |                   |                   |                   |
| <i>Antigua and Barbuda</i>         |                                       |                   |                   |                   |                   |                                       |                   |                   |                   |                   |
| rural                              | 18.9 (16.9, 20.8)                     | 15.6 (12.2, 18.9) | 17.7 (15.8, 19.7) | 20.6 (18.8, 22.4) | 22.2 (19.8, 24.5) | 20.7 (18.9, 22.4)                     | 17.4 (14.0, 20.6) | 19.5 (17.8, 21.2) | 22.4 (20.8, 23.9) | 24.0 (21.8, 26.2) |
| urban                              | 19.3 (17.3, 21.3)                     | 16.1 (12.8, 19.5) | 18.2 (16.2, 20.2) | 21.0 (19.2, 22.9) | 22.6 (20.3, 25.0) | 21.2 (19.5, 22.9)                     | 18.0 (14.8, 21.2) | 20.1 (18.4, 21.8) | 22.9 (21.3, 24.5) | 24.5 (22.3, 26.7) |
| urban-rural difference             | 0.5 (-0.3, 1.2)                       | 0.5 (-0.5, 1.5)   | 0.5 (-0.3, 1.3)   | 0.4 (-0.3, 1.2)   | 0.4 (-0.4, 1.2)   | 0.6 (-0.2, 1.3)                       | 0.6 (-0.4, 1.6)   | 0.6 (-0.2, 1.3)   | 0.5 (-0.2, 1.2)   | 0.5 (-0.3, 1.3)   |
| <b>Bahamas</b>                     |                                       |                   |                   |                   |                   |                                       |                   |                   |                   |                   |
| rural                              | 18.8 (17.0, 20.6)                     | 15.6 (12.3, 18.9) | 17.7 (15.9, 19.5) | 20.5 (18.8, 22.2) | 22.0 (19.7, 24.3) | 20.7 (19.1, 22.2)                     | 17.5 (14.3, 20.6) | 19.6 (18.1, 21.1) | 22.4 (21.0, 23.8) | 23.9 (21.9, 25.8) |
| urban                              | 19.4 (17.5, 21.1)                     | 16.2 (12.9, 19.4) | 18.3 (16.5, 20.0) | 21.0 (19.4, 22.6) | 22.5 (20.2, 24.7) | 21.3 (19.8, 22.8)                     | 18.2 (15.1, 21.3) | 20.2 (18.8, 21.7) | 23.0 (21.7, 24.3) | 24.5 (22.5, 26.3) |
| urban-rural difference             | 0.5 (-0.2, 1.3)                       | 0.6 (-0.4, 1.6)   | 0.6 (-0.2, 1.4)   | 0.5 (-0.3, 1.3)   | 0.5 (-0.4, 1.3)   | 0.6 (-0.1, 1.3)                       | 0.7 (-0.3, 1.7)   | 0.7 (-0.1, 1.4)   | 0.6 (-0.1, 1.3)   | 0.6 (-0.2, 1.3)   |
| <b>Barbados</b>                    |                                       |                   |                   |                   |                   |                                       |                   |                   |                   |                   |
| rural                              | 18.4 (16.6, 20.2)                     | 15.1 (11.9, 18.4) | 17.3 (15.5, 19.1) | 20.2 (18.5, 21.8) | 21.7 (19.5, 24.0) | 20.2 (18.6, 21.8)                     | 16.9 (13.8, 20.1) | 19.1 (17.5, 20.7) | 21.9 (20.5, 23.3) | 23.5 (21.5, 25.6) |
| urban                              | 18.9 (17.1, 20.8)                     | 15.7 (12.4, 19.0) | 17.8 (16.0, 19.6) | 20.6 (18.9, 22.3) | 22.2 (19.9, 24.3) | 20.8 (19.2, 22.4)                     | 17.6 (14.4, 20.7) | 19.7 (18.1, 21.3) | 22.5 (21.0, 23.9) | 24.0 (22.0, 26.0) |

| Boys                             | Mean BMI in 1990 (kg/m <sup>2</sup> ) |                   |                   |                   |                   | Mean BMI in 2020 (kg/m <sup>2</sup> ) |                   |                   |                   |                   |
|----------------------------------|---------------------------------------|-------------------|-------------------|-------------------|-------------------|---------------------------------------|-------------------|-------------------|-------------------|-------------------|
|                                  | Age-standardised                      | 5 years           | 10 years          | 15 years          | 19 years          | Age-standardised                      | 5 years           | 10 years          | 15 years          | 19 years          |
| urban-rural difference           | 0.5 (-0.3, 1.2)                       | 0.6 (-0.4, 1.6)   | 0.5 (-0.3, 1.3)   | 0.5 (-0.3, 1.2)   | 0.4 (-0.4, 1.2)   | 0.6 (-0.2, 1.3)                       | 0.6 (-0.4, 1.6)   | 0.6 (-0.2, 1.4)   | 0.6 (-0.2, 1.3)   | 0.5 (-0.3, 1.3)   |
| Belize                           |                                       |                   |                   |                   |                   |                                       |                   |                   |                   |                   |
| rural                            | 18.6 (16.8, 20.5)                     | 15.3 (12.1, 18.6) | 17.5 (15.6, 19.3) | 20.4 (18.6, 22.1) | 21.9 (19.6, 24.3) | 20.4 (18.8, 22.1)                     | 17.1 (14.0, 20.3) | 19.3 (17.7, 21.0) | 22.2 (20.7, 23.7) | 23.7 (21.6, 25.8) |
| urban                            | 19.1 (17.2, 21.0)                     | 15.9 (12.7, 19.1) | 18.0 (16.1, 19.8) | 20.8 (19.1, 22.6) | 22.4 (20.1, 24.7) | 21.0 (19.4, 22.7)                     | 17.8 (14.7, 20.9) | 19.9 (18.3, 21.5) | 22.7 (21.2, 24.2) | 24.3 (22.1, 26.4) |
| urban-rural difference           | 0.5 (-0.2, 1.2)                       | 0.6 (-0.4, 1.6)   | 0.5 (-0.3, 1.3)   | 0.5 (-0.3, 1.2)   | 0.4 (-0.4, 1.3)   | 0.6 (-0.1, 1.3)                       | 0.7 (-0.3, 1.7)   | 0.6 (-0.2, 1.4)   | 0.6 (-0.1, 1.3)   | 0.5 (-0.3, 1.3)   |
| Bermuda                          |                                       |                   |                   |                   |                   |                                       |                   |                   |                   |                   |
| rural                            | 17.8 (15.5, 20.1)                     | 14.5 (10.9, 18.1) | 16.7 (14.4, 19.0) | 19.6 (17.4, 21.8) | 21.2 (18.5, 23.9) | 19.5 (17.4, 21.9)                     | 16.2 (12.7, 19.8) | 18.4 (16.3, 20.7) | 21.3 (19.2, 23.5) | 22.9 (20.3, 25.5) |
| urban                            | 18.3 (16.0, 20.6)                     | 15.1 (11.6, 18.7) | 17.2 (14.9, 19.6) | 20.0 (17.8, 22.3) | 21.6 (18.9, 24.4) | 20.1 (17.9, 22.4)                     | 16.9 (13.4, 20.5) | 19.0 (16.9, 21.3) | 21.8 (19.8, 24.1) | 23.4 (20.8, 26.0) |
| urban-rural difference           | 0.5 (-0.3, 1.2)                       | 0.6 (-0.4, 1.6)   | 0.5 (-0.3, 1.3)   | 0.5 (-0.3, 1.2)   | 0.4 (-0.4, 1.3)   | 0.6 (-0.1, 1.3)                       | 0.7 (-0.4, 1.7)   | 0.6 (-0.2, 1.4)   | 0.6 (-0.1, 1.3)   | 0.5 (-0.2, 1.3)   |
| Cuba                             |                                       |                   |                   |                   |                   |                                       |                   |                   |                   |                   |
| rural                            | 17.5 (16.1, 19.0)                     | 14.1 (11.0, 17.2) | 16.5 (15.0, 18.0) | 19.3 (18.1, 20.6) | 20.5 (19.2, 21.9) | 18.9 (17.4, 20.4)                     | 15.5 (12.3, 18.6) | 17.9 (16.3, 19.4) | 20.7 (19.3, 22.0) | 21.9 (20.5, 23.3) |
| urban                            | 18.1 (16.8, 19.4)                     | 14.9 (11.7, 17.9) | 17.1 (15.7, 18.5) | 19.8 (18.7, 21.0) | 21.0 (19.8, 22.1) | 19.6 (18.1, 21.1)                     | 16.3 (13.1, 19.4) | 18.6 (17.1, 20.1) | 21.3 (20.0, 22.6) | 22.4 (21.1, 23.7) |
| urban-rural difference           | 0.6 (-0.1, 1.3)                       | 0.7 (-0.3, 1.7)   | 0.6 (-0.1, 1.4)   | 0.5 (-0.2, 1.2)   | 0.4 (-0.3, 1.2)   | 0.7 (0.0, 1.3)                        | 0.8 (-0.2, 1.8)   | 0.7 (0.0, 1.4)    | 0.6 (0.0, 1.2)    | 0.5 (-0.1, 1.2)   |
| Dominica                         |                                       |                   |                   |                   |                   |                                       |                   |                   |                   |                   |
| rural                            | 17.5 (15.7, 19.3)                     | 14.3 (11.0, 17.4) | 16.5 (14.6, 18.3) | 19.2 (17.6, 20.8) | 20.6 (18.6, 22.5) | 19.2 (17.6, 20.8)                     | 16.0 (12.8, 19.2) | 18.2 (16.5, 19.8) | 20.9 (19.6, 22.4) | 22.3 (20.5, 24.1) |
| urban                            | 18.0 (16.2, 19.7)                     | 14.8 (11.5, 18.1) | 17.0 (15.2, 18.7) | 19.7 (18.1, 21.3) | 21.0 (19.0, 22.9) | 19.8 (18.2, 21.3)                     | 16.7 (13.4, 19.7) | 18.8 (17.2, 20.3) | 21.5 (20.1, 22.8) | 22.8 (21.0, 24.5) |
| urban-rural difference           | 0.5 (-0.2, 1.2)                       | 0.6 (-0.4, 1.6)   | 0.5 (-0.2, 1.3)   | 0.5 (-0.3, 1.2)   | 0.4 (-0.4, 1.2)   | 0.6 (-0.1, 1.3)                       | 0.7 (-0.3, 1.7)   | 0.6 (-0.1, 1.4)   | 0.6 (-0.1, 1.2)   | 0.5 (-0.3, 1.3)   |
| Dominican Republic               |                                       |                   |                   |                   |                   |                                       |                   |                   |                   |                   |
| rural                            | 17.0 (15.3, 18.6)                     | 13.7 (10.6, 16.9) | 15.8 (14.1, 17.5) | 18.7 (17.2, 20.1) | 20.5 (19.1, 22.0) | 19.0 (17.7, 20.3)                     | 15.7 (12.6, 18.7) | 17.8 (16.4, 19.2) | 20.7 (19.6, 21.8) | 22.5 (21.5, 23.6) |
| urban                            | 17.4 (15.8, 19.0)                     | 14.2 (11.1, 17.4) | 16.3 (14.6, 17.9) | 19.1 (17.6, 20.5) | 20.9 (19.5, 22.4) | 19.5 (18.2, 20.7)                     | 16.3 (13.3, 19.3) | 18.3 (17.0, 19.6) | 21.2 (20.2, 22.2) | 23.0 (22.0, 24.0) |
| urban-rural difference           | 0.4 (-0.3, 1.2)                       | 0.5 (-0.5, 1.5)   | 0.5 (-0.3, 1.2)   | 0.4 (-0.3, 1.1)   | 0.4 (-0.4, 1.1)   | 0.5 (-0.1, 1.1)                       | 0.6 (-0.4, 1.6)   | 0.5 (-0.1, 1.2)   | 0.5 (-0.1, 1.0)   | 0.4 (-0.2, 1.0)   |
| Grenada                          |                                       |                   |                   |                   |                   |                                       |                   |                   |                   |                   |
| rural                            | 17.8 (15.4, 20.1)                     | 14.5 (11.1, 18.1) | 16.7 (14.3, 19.0) | 19.6 (17.3, 21.8) | 21.2 (18.5, 23.8) | 19.5 (17.2, 21.8)                     | 16.2 (12.7, 19.7) | 18.4 (16.1, 20.7) | 21.3 (19.1, 23.4) | 22.9 (20.3, 25.5) |
| urban                            | 18.3 (16.0, 20.6)                     | 15.1 (11.6, 18.6) | 17.2 (14.9, 19.5) | 20.0 (17.8, 22.3) | 21.6 (18.9, 24.3) | 20.1 (17.9, 22.4)                     | 16.9 (13.4, 20.4) | 19.0 (16.8, 21.3) | 21.9 (19.7, 24.0) | 23.4 (20.8, 26.0) |
| urban-rural difference           | 0.5 (-0.3, 1.3)                       | 0.6 (-0.5, 1.6)   | 0.5 (-0.3, 1.3)   | 0.5 (-0.3, 1.2)   | 0.4 (-0.4, 1.3)   | 0.6 (-0.1, 1.3)                       | 0.7 (-0.3, 1.7)   | 0.6 (-0.1, 1.4)   | 0.6 (-0.2, 1.3)   | 0.5 (-0.3, 1.3)   |
| Guyana                           |                                       |                   |                   |                   |                   |                                       |                   |                   |                   |                   |
| rural                            | 16.8 (15.1, 18.5)                     | 13.6 (10.4, 16.8) | 15.6 (13.9, 17.3) | 18.5 (16.9, 20.1) | 20.3 (18.6, 21.9) | 18.4 (17.2, 19.7)                     | 15.2 (12.3, 18.2) | 17.2 (15.9, 18.6) | 20.1 (19.0, 21.2) | 21.9 (20.8, 23.0) |
| urban                            | 17.4 (15.7, 19.1)                     | 14.3 (11.1, 17.4) | 16.2 (14.5, 18.0) | 19.1 (17.5, 20.7) | 20.8 (19.1, 22.4) | 19.1 (17.8, 20.5)                     | 16.0 (13.0, 19.0) | 18.0 (16.6, 19.4) | 20.8 (19.7, 22.0) | 22.6 (21.4, 23.7) |
| urban-rural difference           | 0.6 (-0.1, 1.3)                       | 0.7 (-0.3, 1.6)   | 0.6 (-0.1, 1.4)   | 0.6 (-0.1, 1.3)   | 0.5 (-0.2, 1.3)   | 0.7 (0.0, 1.4)                        | 0.8 (-0.2, 1.8)   | 0.7 (0.0, 1.5)    | 0.7 (0.1, 1.3)    | 0.6 (0.0, 1.3)    |
| Haiti                            |                                       |                   |                   |                   |                   |                                       |                   |                   |                   |                   |
| rural                            | 17.8 (15.5, 20.2)                     | 14.5 (10.9, 18.2) | 16.7 (14.4, 19.0) | 19.6 (17.3, 21.9) | 21.2 (18.5, 24.0) | 19.6 (17.3, 21.8)                     | 16.3 (12.7, 19.8) | 18.4 (16.2, 20.7) | 21.3 (19.2, 23.5) | 22.9 (20.3, 25.5) |
| urban                            | 18.3 (16.0, 20.7)                     | 15.1 (11.5, 18.6) | 17.2 (14.9, 19.6) | 20.1 (17.8, 22.3) | 21.6 (18.9, 24.4) | 20.1 (18.0, 22.4)                     | 16.9 (13.4, 20.4) | 19.0 (16.8, 21.2) | 21.9 (19.8, 24.0) | 23.4 (20.8, 26.0) |
| urban-rural difference           | 0.5 (-0.3, 1.2)                       | 0.6 (-0.4, 1.6)   | 0.5 (-0.3, 1.3)   | 0.5 (-0.3, 1.2)   | 0.4 (-0.4, 1.3)   | 0.6 (-0.1, 1.3)                       | 0.7 (-0.3, 1.6)   | 0.6 (-0.2, 1.4)   | 0.6 (-0.1, 1.3)   | 0.5 (-0.3, 1.3)   |
| Jamaica                          |                                       |                   |                   |                   |                   |                                       |                   |                   |                   |                   |
| rural                            | 16.5 (14.9, 18.1)                     | 12.4 (9.8, 15.0)  | 15.3 (13.7, 16.8) | 18.6 (17.1, 20.0) | 20.2 (18.6, 21.7) | 17.6 (16.5, 18.6)                     | 13.5 (11.2, 15.9) | 16.4 (15.2, 17.5) | 19.6 (18.7, 20.6) | 21.2 (20.2, 22.3) |
| urban                            | 17.0 (15.4, 18.5)                     | 13.0 (10.5, 15.5) | 15.8 (14.2, 17.3) | 19.0 (17.5, 20.4) | 20.5 (19.0, 22.0) | 18.2 (17.1, 19.2)                     | 14.2 (12.0, 16.6) | 17.0 (15.9, 18.1) | 20.2 (19.3, 21.1) | 21.8 (20.7, 22.8) |
| urban-rural difference           | 0.5 (-0.2, 1.1)                       | 0.6 (-0.4, 1.5)   | 0.5 (-0.2, 1.2)   | 0.4 (-0.2, 1.0)   | 0.4 (-0.3, 1.0)   | 0.6 (0.0, 1.2)                        | 0.7 (-0.2, 1.7)   | 0.6 (0.0, 1.3)    | 0.6 (0.0, 1.1)    | 0.5 (-0.1, 1.1)   |
| Puerto Rico                      |                                       |                   |                   |                   |                   |                                       |                   |                   |                   |                   |
| rural                            | 17.8 (15.4, 20.1)                     | 14.5 (10.9, 18.1) | 16.7 (14.3, 19.0) | 19.6 (17.3, 21.9) | 21.2 (18.4, 23.9) | 19.6 (17.3, 21.8)                     | 16.3 (12.7, 19.7) | 18.4 (16.2, 20.7) | 21.3 (19.2, 23.5) | 22.9 (20.3, 25.5) |
| urban                            | 18.3 (15.9, 20.7)                     | 15.1 (11.5, 18.7) | 17.2 (14.9, 19.6) | 20.1 (17.8, 22.3) | 21.6 (18.9, 24.3) | 20.2 (17.9, 22.4)                     | 16.9 (13.4, 20.4) | 19.1 (16.8, 21.4) | 21.9 (19.7, 24.1) | 23.4 (20.8, 26.0) |
| urban-rural difference           | 0.5 (-0.2, 1.3)                       | 0.6 (-0.4, 1.6)   | 0.5 (-0.3, 1.3)   | 0.5 (-0.3, 1.2)   | 0.4 (-0.4, 1.2)   | 0.6 (-0.1, 1.3)                       | 0.7 (-0.3, 1.7)   | 0.6 (-0.2, 1.4)   | 0.6 (-0.1, 1.3)   | 0.5 (-0.3, 1.3)   |
| Saint Kitts and Nevis            |                                       |                   |                   |                   |                   |                                       |                   |                   |                   |                   |
| rural                            | 18.5 (16.7, 20.2)                     | 15.1 (11.9, 18.4) | 17.3 (15.6, 19.1) | 20.2 (18.6, 21.9) | 21.9 (19.7, 24.1) | 20.3 (18.7, 21.7)                     | 16.9 (13.9, 20.0) | 19.1 (17.6, 20.6) | 22.0 (20.7, 23.3) | 23.7 (21.7, 25.6) |
| urban                            | 19.0 (17.1, 20.8)                     | 15.7 (12.5, 19.0) | 17.8 (16.0, 19.6) | 20.7 (19.0, 22.3) | 22.3 (20.1, 24.5) | 20.8 (19.3, 22.3)                     | 17.6 (14.5, 20.7) | 19.7 (18.1, 21.2) | 22.6 (21.2, 23.9) | 24.2 (22.2, 26.2) |
| urban-rural difference           | 0.5 (-0.3, 1.2)                       | 0.6 (-0.4, 1.6)   | 0.5 (-0.3, 1.3)   | 0.5 (-0.3, 1.2)   | 0.4 (-0.4, 1.2)   | 0.6 (-0.2, 1.3)                       | 0.6 (-0.3, 1.7)   | 0.6 (-0.2, 1.4)   | 0.6 (-0.2, 1.2)   | 0.5 (-0.3, 1.3)   |
| Saint Lucia                      |                                       |                   |                   |                   |                   |                                       |                   |                   |                   |                   |
| rural                            | 17.8 (15.4, 20.2)                     | 14.5 (10.9, 18.2) | 16.7 (14.3, 19.0) | 19.6 (17.3, 21.8) | 21.2 (18.5, 23.8) | 19.5 (17.2, 21.8)                     | 16.2 (12.6, 19.8) | 18.4 (16.1, 20.7) | 21.3 (19.1, 23.4) | 22.9 (20.2, 25.5) |
| urban                            | 18.3 (16.0, 20.6)                     | 15.1 (11.5, 18.7) | 17.2 (14.9, 19.5) | 20.0 (17.8, 22.3) | 21.6 (18.9, 24.3) | 20.1 (17.8, 22.4)                     | 16.9 (13.3, 20.6) | 19.0 (16.7, 21.3) | 21.9 (19.6, 24.0) | 23.4 (20.8, 26.0) |
| urban-rural difference           | 0.5 (-0.3, 1.2)                       | 0.6 (-0.4, 1.6)   | 0.5 (-0.3, 1.3)   | 0.5 (-0.3, 1.2)   | 0.4 (-0.4, 1.2)   | 0.6 (-0.1, 1.3)                       | 0.7 (-0.3, 1.6)   | 0.6 (-0.1, 1.4)   | 0.6 (-0.1, 1.2)   | 0.5 (-0.3, 1.3)   |
| Saint Vincent and the Grenadines |                                       |                   |                   |                   |                   |                                       |                   |                   |                   |                   |
| rural                            | 18.2 (16.4, 19.8)                     | 14.9 (11.7, 17.9) | 17.0 (15.2, 18.7) | 19.9 (18.2, 21.5) | 21.6 (19.6, 23.5) | 19.9 (18.8, 21.0)                     | 16.6 (13.6, 19.4) | 18.7 (17.6, 19.9) | 21.6 (20.7, 22.5) | 23.3 (21.9, 24.7) |

| Boys                          | Mean BMI in 1990 (kg/m <sup>2</sup> ) |                   |                   |                   |                   | Mean BMI in 2020 (kg/m <sup>2</sup> ) |                   |                   |                   |                   |
|-------------------------------|---------------------------------------|-------------------|-------------------|-------------------|-------------------|---------------------------------------|-------------------|-------------------|-------------------|-------------------|
|                               | Age-standardised                      | 5 years           | 10 years          | 15 years          | 19 years          | Age-standardised                      | 5 years           | 10 years          | 15 years          | 19 years          |
| urban                         | 18.6 (16.9, 20.4)                     | 15.4 (12.3, 18.5) | 17.5 (15.7, 19.3) | 20.3 (18.7, 22.0) | 22.0 (20.1, 24.0) | 20.5 (19.4, 21.6)                     | 17.2 (14.3, 20.1) | 19.3 (18.2, 20.5) | 22.2 (21.3, 23.0) | 23.9 (22.5, 25.3) |
| urban-rural difference        | 0.5 (-0.3, 1.3)                       | 0.6 (-0.4, 1.5)   | 0.5 (-0.3, 1.3)   | 0.5 (-0.3, 1.2)   | 0.4 (-0.4, 1.3)   | 0.6 (-0.1, 1.3)                       | 0.7 (-0.3, 1.6)   | 0.6 (-0.2, 1.4)   | 0.6 (-0.1, 1.2)   | 0.5 (-0.3, 1.3)   |
| <b>Suriname</b>               |                                       |                   |                   |                   |                   |                                       |                   |                   |                   |                   |
| rural                         | 17.9 (15.6, 20.2)                     | 14.6 (11.0, 18.1) | 16.8 (14.5, 19.1) | 19.6 (17.4, 21.9) | 21.3 (18.6, 23.9) | 19.6 (17.4, 21.9)                     | 16.3 (12.8, 19.8) | 18.5 (16.3, 20.8) | 21.4 (19.2, 23.6) | 23.0 (20.5, 25.6) |
| urban                         | 18.4 (16.1, 20.7)                     | 15.1 (11.6, 18.7) | 17.3 (15.0, 19.6) | 20.1 (17.9, 22.4) | 21.7 (19.0, 24.4) | 20.2 (18.0, 22.5)                     | 17.0 (13.5, 20.5) | 19.1 (16.9, 21.4) | 21.9 (19.9, 24.1) | 23.6 (21.0, 26.1) |
| urban-rural difference        | 0.5 (-0.2, 1.3)                       | 0.6 (-0.4, 1.6)   | 0.5 (-0.3, 1.3)   | 0.5 (-0.3, 1.2)   | 0.4 (-0.4, 1.2)   | 0.6 (-0.1, 1.3)                       | 0.7 (-0.3, 1.7)   | 0.6 (-0.2, 1.4)   | 0.6 (-0.1, 1.3)   | 0.5 (-0.3, 1.3)   |
| <b>Trinidad and Tobago</b>    |                                       |                   |                   |                   |                   |                                       |                   |                   |                   |                   |
| rural                         | 17.1 (15.8, 18.6)                     | 13.7 (12.3, 15.1) | 16.0 (14.6, 17.4) | 19.0 (17.5, 20.5) | 20.6 (18.8, 22.5) | 19.0 (17.7, 20.4)                     | 15.6 (14.1, 17.0) | 17.9 (16.4, 19.2) | 20.9 (19.5, 22.2) | 22.5 (20.8, 24.3) |
| urban                         | 17.7 (16.3, 19.2)                     | 14.3 (12.9, 15.7) | 16.5 (15.2, 18.0) | 19.5 (18.1, 21.0) | 21.2 (19.4, 23.1) | 19.7 (18.4, 21.0)                     | 16.3 (14.8, 17.7) | 18.5 (17.1, 19.9) | 21.5 (20.1, 22.9) | 23.2 (21.5, 24.9) |
| urban-rural difference        | 0.6 (0.0, 1.1)                        | 0.6 (0.0, 1.2)    | 0.6 (0.1, 1.1)    | 0.6 (0.0, 1.2)    | 0.5 (-0.2, 1.3)   | 0.7 (0.0, 1.3)                        | 0.7 (0.0, 1.4)    | 0.7 (0.0, 1.3)    | 0.7 (0.0, 1.3)    | 0.6 (-0.1, 1.4)   |
| <b>Central Latin America</b>  |                                       |                   |                   |                   |                   |                                       |                   |                   |                   |                   |
| <b>Colombia</b>               |                                       |                   |                   |                   |                   |                                       |                   |                   |                   |                   |
| rural                         | 17.0 (15.4, 18.5)                     | 14.3 (12.7, 15.9) | 15.7 (14.2, 17.3) | 18.5 (17.0, 20.0) | 20.5 (18.9, 22.0) | 19.0 (18.1, 19.8)                     | 16.3 (15.4, 17.1) | 17.7 (16.9, 18.5) | 20.5 (19.6, 21.3) | 22.5 (21.6, 23.3) |
| urban                         | 17.4 (15.9, 19.0)                     | 14.9 (13.4, 16.4) | 16.2 (14.7, 17.7) | 18.9 (17.4, 20.4) | 20.8 (19.3, 22.3) | 19.4 (18.6, 20.2)                     | 16.8 (16.0, 17.7) | 18.2 (17.4, 19.0) | 20.8 (20.0, 21.7) | 22.8 (21.9, 23.6) |
| urban-rural difference        | 0.5 (-0.1, 1.0)                       | 0.6 (0.0, 1.1)    | 0.5 (0.0, 1.0)    | 0.4 (-0.1, 0.9)   | 0.3 (-0.2, 0.9)   | 0.4 (0.0, 0.8)                        | 0.6 (0.1, 1.0)    | 0.5 (0.1, 0.9)    | 0.4 (0.0, 0.8)    | 0.3 (-0.1, 0.7)   |
| <b>Costa Rica</b>             |                                       |                   |                   |                   |                   |                                       |                   |                   |                   |                   |
| rural                         | 17.8 (16.1, 19.6)                     | 14.8 (11.9, 17.8) | 16.6 (14.9, 18.4) | 19.4 (17.8, 21.1) | 21.5 (19.6, 23.5) | 19.4 (18.0, 20.8)                     | 16.4 (13.6, 19.2) | 18.2 (16.8, 19.6) | 21.0 (19.8, 22.2) | 23.1 (21.5, 24.6) |
| urban                         | 18.3 (16.6, 20.1)                     | 15.3 (12.3, 18.2) | 17.1 (15.4, 18.8) | 19.9 (18.3, 21.6) | 22.0 (20.1, 23.9) | 19.8 (18.5, 21.1)                     | 16.8 (13.9, 19.5) | 18.6 (17.3, 19.9) | 21.4 (20.3, 22.6) | 23.5 (22.1, 24.9) |
| urban-rural difference        | 0.5 (-0.3, 1.2)                       | 0.4 (-0.5, 1.4)   | 0.5 (-0.3, 1.2)   | 0.5 (-0.2, 1.2)   | 0.5 (-0.3, 1.3)   | 0.4 (-0.3, 1.1)                       | 0.4 (-0.6, 1.3)   | 0.4 (-0.3, 1.1)   | 0.4 (-0.2, 1.1)   | 0.4 (-0.3, 1.2)   |
| <b>El Salvador</b>            |                                       |                   |                   |                   |                   |                                       |                   |                   |                   |                   |
| rural                         | 17.8 (15.4, 20.3)                     | 14.7 (11.1, 18.2) | 16.7 (14.2, 19.0) | 19.5 (17.2, 21.8) | 21.3 (18.7, 24.1) | 19.6 (17.3, 21.9)                     | 16.4 (13.0, 19.9) | 18.4 (16.2, 20.7) | 21.3 (19.1, 23.4) | 23.1 (20.5, 25.7) |
| urban                         | 18.3 (15.9, 20.7)                     | 15.2 (11.6, 18.7) | 17.2 (14.7, 19.5) | 20.0 (17.7, 22.3) | 21.8 (19.2, 24.6) | 20.1 (17.8, 22.3)                     | 16.9 (13.5, 20.2) | 18.9 (16.7, 21.1) | 21.7 (19.6, 23.9) | 23.6 (20.9, 26.2) |
| urban-rural difference        | 0.5 (-0.2, 1.2)                       | 0.5 (-0.5, 1.4)   | 0.5 (-0.3, 1.3)   | 0.5 (-0.2, 1.2)   | 0.5 (-0.3, 1.3)   | 0.5 (-0.2, 1.1)                       | 0.4 (-0.5, 1.4)   | 0.5 (-0.3, 1.2)   | 0.5 (-0.2, 1.1)   | 0.5 (-0.3, 1.3)   |
| <b>Guatemala</b>              |                                       |                   |                   |                   |                   |                                       |                   |                   |                   |                   |
| rural                         | 17.7 (16.2, 19.2)                     | 14.4 (12.8, 16.0) | 16.6 (15.1, 18.2) | 19.4 (17.9, 20.9) | 21.0 (19.4, 22.5) | 18.8 (18.3, 19.4)                     | 15.5 (14.8, 16.3) | 17.8 (17.2, 18.4) | 20.5 (19.9, 21.2) | 22.1 (21.3, 22.9) |
| urban                         | 18.2 (16.7, 19.7)                     | 14.8 (13.2, 16.4) | 17.1 (15.6, 18.6) | 19.9 (18.4, 21.4) | 21.5 (20.0, 23.1) | 19.3 (18.7, 19.9)                     | 15.9 (15.1, 16.7) | 18.2 (17.5, 18.9) | 21.0 (20.4, 21.7) | 22.6 (21.8, 23.4) |
| urban-rural difference        | 0.5 (-0.2, 1.1)                       | 0.4 (-0.5, 1.3)   | 0.5 (-0.3, 1.2)   | 0.5 (-0.1, 1.1)   | 0.6 (-0.1, 1.2)   | 0.4 (-0.1, 1.0)                       | 0.4 (-0.5, 1.2)   | 0.4 (-0.2, 1.1)   | 0.5 (-0.1, 1.0)   | 0.5 (0.0, 1.1)    |
| <b>Honduras</b>               |                                       |                   |                   |                   |                   |                                       |                   |                   |                   |                   |
| rural                         | 17.8 (15.5, 20.2)                     | 14.7 (11.3, 18.0) | 16.7 (14.3, 19.0) | 19.5 (17.3, 21.8) | 21.3 (18.7, 24.1) | 19.6 (17.3, 21.9)                     | 16.4 (13.1, 19.8) | 18.4 (16.1, 20.7) | 21.3 (19.1, 23.5) | 23.1 (20.5, 25.7) |
| urban                         | 18.3 (16.0, 20.7)                     | 15.1 (11.8, 18.5) | 17.2 (14.8, 19.5) | 20.0 (17.8, 22.3) | 21.9 (19.2, 24.6) | 20.1 (17.8, 22.3)                     | 16.9 (13.6, 20.2) | 18.9 (16.6, 21.2) | 21.7 (19.6, 23.9) | 23.6 (21.0, 26.2) |
| urban-rural difference        | 0.5 (-0.2, 1.3)                       | 0.5 (-0.5, 1.5)   | 0.5 (-0.3, 1.3)   | 0.5 (-0.2, 1.2)   | 0.5 (-0.2, 1.3)   | 0.5 (-0.2, 1.1)                       | 0.4 (-0.5, 1.4)   | 0.5 (-0.3, 1.2)   | 0.5 (-0.2, 1.1)   | 0.5 (-0.3, 1.2)   |
| <b>Mexico</b>                 |                                       |                   |                   |                   |                   |                                       |                   |                   |                   |                   |
| rural                         | 18.3 (16.9, 19.6)                     | 14.5 (13.2, 15.9) | 17.1 (15.7, 18.4) | 20.2 (18.9, 21.5) | 22.1 (20.7, 23.4) | 20.0 (19.4, 20.5)                     | 16.2 (15.6, 16.8) | 18.8 (18.2, 19.3) | 21.9 (21.3, 22.4) | 23.8 (23.1, 24.4) |
| urban                         | 19.0 (17.6, 20.3)                     | 15.1 (13.7, 16.4) | 17.7 (16.4, 19.1) | 20.9 (19.6, 22.3) | 22.9 (21.6, 24.3) | 20.6 (20.0, 21.1)                     | 16.7 (16.1, 17.3) | 19.3 (18.8, 19.9) | 22.5 (22.0, 23.1) | 24.5 (23.9, 25.2) |
| urban-rural difference        | 0.7 (0.2, 1.2)                        | 0.5 (0.0, 1.0)    | 0.6 (0.2, 1.1)    | 0.8 (0.3, 1.3)    | 0.9 (0.4, 1.4)    | 0.6 (0.3, 1.0)                        | 0.5 (0.1, 0.8)    | 0.6 (0.2, 0.9)    | 0.7 (0.3, 1.0)    | 0.8 (0.4, 1.2)    |
| <b>Nicaragua</b>              |                                       |                   |                   |                   |                   |                                       |                   |                   |                   |                   |
| rural                         | 17.8 (15.3, 20.2)                     | 14.6 (11.1, 18.2) | 16.6 (14.1, 19.0) | 19.5 (17.1, 21.8) | 21.3 (18.5, 24.0) | 19.6 (17.3, 21.9)                     | 16.4 (12.9, 19.9) | 18.4 (16.1, 20.7) | 21.2 (19.0, 23.5) | 23.0 (20.4, 25.8) |
| urban                         | 18.3 (15.8, 20.7)                     | 15.1 (11.6, 18.7) | 17.1 (14.7, 19.5) | 20.0 (17.6, 22.3) | 21.8 (19.0, 24.6) | 20.0 (17.7, 22.3)                     | 16.8 (13.4, 20.3) | 18.9 (16.6, 21.1) | 21.7 (19.5, 23.9) | 23.5 (20.8, 26.2) |
| urban-rural difference        | 0.5 (-0.2, 1.2)                       | 0.5 (-0.5, 1.4)   | 0.5 (-0.2, 1.3)   | 0.5 (-0.2, 1.2)   | 0.5 (-0.3, 1.3)   | 0.5 (-0.2, 1.1)                       | 0.4 (-0.5, 1.4)   | 0.5 (-0.3, 1.2)   | 0.5 (-0.2, 1.1)   | 0.5 (-0.3, 1.2)   |
| <b>Panama</b>                 |                                       |                   |                   |                   |                   |                                       |                   |                   |                   |                   |
| rural                         | 18.0 (16.5, 19.5)                     | 15.1 (13.5, 16.6) | 16.8 (15.3, 18.3) | 19.6 (18.2, 21.1) | 21.4 (19.8, 23.0) | 19.8 (19.1, 20.4)                     | 16.8 (16.1, 17.6) | 18.6 (17.9, 19.3) | 21.4 (20.8, 22.1) | 23.2 (22.4, 24.0) |
| urban                         | 18.4 (16.9, 19.9)                     | 15.3 (13.8, 16.9) | 17.1 (15.7, 18.6) | 20.1 (18.6, 21.6) | 21.9 (20.4, 23.5) | 20.1 (19.4, 20.7)                     | 17.0 (16.2, 17.8) | 18.8 (18.1, 19.5) | 21.8 (21.1, 22.4) | 23.6 (22.8, 24.3) |
| urban-rural difference        | 0.4 (-0.2, 1.0)                       | 0.3 (-0.4, 0.9)   | 0.3 (-0.2, 1.0)   | 0.4 (-0.1, 1.0)   | 0.5 (-0.1, 1.2)   | 0.3 (-0.3, 0.8)                       | 0.2 (-0.5, 0.8)   | 0.2 (-0.3, 0.8)   | 0.3 (-0.2, 0.9)   | 0.4 (-0.2, 1.0)   |
| <b>Venezuela</b>              |                                       |                   |                   |                   |                   |                                       |                   |                   |                   |                   |
| rural                         | 18.1 (16.3, 19.9)                     | 15.0 (12.3, 17.6) | 17.0 (15.1, 18.7) | 19.8 (18.0, 21.5) | 21.8 (19.9, 23.7) | 20.1 (18.7, 21.4)                     | 16.9 (14.5, 19.3) | 18.9 (17.5, 20.3) | 21.7 (20.4, 23.1) | 23.7 (22.2, 25.1) |
| urban                         | 18.7 (16.9, 20.3)                     | 15.5 (12.9, 18.1) | 17.5 (15.7, 19.1) | 20.3 (18.6, 22.0) | 22.3 (20.5, 24.1) | 20.5 (19.3, 21.8)                     | 17.4 (15.1, 19.7) | 19.3 (18.0, 20.6) | 22.2 (21.0, 23.4) | 24.2 (22.8, 25.5) |
| urban-rural difference        | 0.5 (-0.2, 1.2)                       | 0.5 (-0.4, 1.4)   | 0.5 (-0.2, 1.3)   | 0.5 (-0.2, 1.2)   | 0.5 (-0.2, 1.3)   | 0.5 (-0.2, 1.1)                       | 0.5 (-0.5, 1.3)   | 0.5 (-0.2, 1.2)   | 0.5 (-0.2, 1.1)   | 0.5 (-0.3, 1.2)   |
| <b>Southern Latin America</b> |                                       |                   |                   |                   |                   |                                       |                   |                   |                   |                   |
| <b>Argentina</b>              |                                       |                   |                   |                   |                   |                                       |                   |                   |                   |                   |
| rural                         | 18.3 (16.8, 19.8)                     | 14.3 (12.6, 15.9) | 17.6 (16.0, 19.1) | 20.1 (18.5, 21.6) | 21.5 (19.8, 23.2) | 20.1 (19.2, 21.0)                     | 16.1 (15.0, 17.1) | 19.4 (18.4, 20.3) | 21.9 (21.0, 22.8) | 23.3 (22.2, 24.4) |
| urban                         | 18.7 (17.2, 20.2)                     | 14.7 (13.2, 16.2) | 18.0 (16.5, 19.4) | 20.5 (19.0, 21.9) | 21.8 (20.2, 23.4) | 20.6 (20.0, 21.3)                     | 16.6 (15.8, 17.4) | 19.9 (19.2, 20.6) | 22.4 (21.7, 23.0) | 23.8 (22.9, 24.6) |

| Boys                            | Mean BMI in 1990 (kg/m <sup>2</sup> ) |                   |                   |                   |                   | Mean BMI in 2020 (kg/m <sup>2</sup> ) |                   |                   |                   |                   |
|---------------------------------|---------------------------------------|-------------------|-------------------|-------------------|-------------------|---------------------------------------|-------------------|-------------------|-------------------|-------------------|
|                                 | Age-standardised                      | 5 years           | 10 years          | 15 years          | 19 years          | Age-standardised                      | 5 years           | 10 years          | 15 years          | 19 years          |
| urban-rural difference          | 0.4 (-0.3, 1.1)                       | 0.4 (-0.4, 1.3)   | 0.4 (-0.3, 1.1)   | 0.4 (-0.3, 1.1)   | 0.3 (-0.4, 1.1)   | 0.5 (-0.1, 1.2)                       | 0.6 (-0.3, 1.4)   | 0.5 (-0.2, 1.2)   | 0.5 (-0.1, 1.1)   | 0.5 (-0.2, 1.2)   |
| <b>Brazil</b>                   |                                       |                   |                   |                   |                   |                                       |                   |                   |                   |                   |
| rural                           | 17.7 (17.1, 18.2)                     | 14.9 (14.4, 15.5) | 16.5 (16.0, 17.1) | 19.1 (18.6, 19.7) | 21.0 (20.5, 21.6) | 19.3 (18.9, 19.6)                     | 16.5 (16.1, 17.0) | 18.1 (17.7, 18.5) | 20.7 (20.3, 21.1) | 22.6 (22.2, 23.0) |
| urban                           | 18.2 (17.7, 18.7)                     | 15.5 (15.0, 16.1) | 17.1 (16.5, 17.6) | 19.7 (19.2, 20.2) | 21.5 (21.0, 22.1) | 20.0 (19.7, 20.3)                     | 17.3 (17.0, 17.7) | 18.9 (18.5, 19.2) | 21.5 (21.1, 21.8) | 23.3 (23.0, 23.7) |
| urban-rural difference          | 0.6 (0.2, 0.9)                        | 0.6 (0.2, 0.9)    | 0.6 (0.2, 0.9)    | 0.5 (0.2, 0.9)    | 0.5 (0.1, 0.9)    | 0.8 (0.5, 1.0)                        | 0.8 (0.5, 1.1)    | 0.8 (0.5, 1.0)    | 0.7 (0.5, 1.0)    | 0.7 (0.5, 1.0)    |
| <b>Chile</b>                    |                                       |                   |                   |                   |                   |                                       |                   |                   |                   |                   |
| rural                           | 19.2 (17.8, 20.6)                     | 15.4 (13.9, 17.0) | 18.2 (16.8, 19.7) | 20.8 (19.4, 22.2) | 23.3 (21.9, 24.7) | 21.3 (20.2, 22.2)                     | 17.5 (16.2, 18.8) | 20.3 (19.2, 21.3) | 22.9 (21.9, 23.9) | 25.4 (24.3, 26.4) |
| urban                           | 19.4 (18.0, 20.8)                     | 15.9 (14.4, 17.5) | 18.5 (17.1, 19.9) | 20.9 (19.5, 22.3) | 23.2 (21.8, 24.6) | 21.5 (20.5, 22.4)                     | 18.1 (16.8, 19.2) | 20.6 (19.6, 21.5) | 23.0 (22.1, 23.9) | 25.3 (24.3, 26.3) |
| urban-rural difference          | 0.2 (-0.4, 0.8)                       | 0.5 (-0.4, 1.3)   | 0.3 (-0.4, 0.9)   | 0.0 (-0.5, 0.7)   | -0.1 (-0.8, 0.5)  | 0.2 (-0.3, 0.8)                       | 0.6 (-0.2, 1.3)   | 0.3 (-0.2, 0.9)   | 0.1 (-0.4, 0.6)   | -0.1 (-0.6, 0.5)  |
| <b>Paraguay</b>                 |                                       |                   |                   |                   |                   |                                       |                   |                   |                   |                   |
| rural                           | 17.5 (15.9, 19.1)                     | 14.1 (11.2, 17.1) | 16.4 (14.9, 18.1) | 19.1 (17.6, 20.5) | 21.0 (19.3, 22.6) | 19.2 (18.2, 20.3)                     | 15.9 (13.2, 18.6) | 18.2 (17.2, 19.3) | 20.8 (20.0, 21.7) | 22.8 (21.6, 23.9) |
| urban                           | 18.0 (16.4, 19.6)                     | 14.7 (11.8, 17.7) | 17.0 (15.5, 18.6) | 19.5 (18.1, 21.0) | 21.4 (19.7, 23.1) | 20.0 (18.9, 21.0)                     | 16.7 (14.1, 19.3) | 19.0 (17.9, 20.0) | 21.5 (20.7, 22.3) | 23.4 (22.2, 24.6) |
| urban-rural difference          | 0.5 (-0.1, 1.2)                       | 0.6 (-0.3, 1.5)   | 0.6 (-0.2, 1.3)   | 0.5 (-0.2, 1.1)   | 0.4 (-0.3, 1.1)   | 0.7 (0.2, 1.3)                        | 0.8 (0.0, 1.7)    | 0.7 (0.1, 1.4)    | 0.7 (0.2, 1.2)    | 0.6 (0.0, 1.2)    |
| <b>Uruguay</b>                  |                                       |                   |                   |                   |                   |                                       |                   |                   |                   |                   |
| rural                           | 18.2 (16.7, 19.7)                     | 15.0 (13.2, 16.7) | 17.2 (15.7, 18.8) | 19.9 (18.3, 21.4) | 21.7 (19.9, 23.5) | 20.2 (19.3, 21.1)                     | 16.9 (15.6, 18.3) | 19.2 (18.2, 20.2) | 21.8 (20.9, 22.7) | 23.6 (22.3, 24.9) |
| urban                           | 18.7 (17.2, 20.1)                     | 15.5 (13.9, 17.0) | 17.7 (16.2, 19.1) | 20.3 (18.8, 21.7) | 22.0 (20.3, 23.7) | 20.8 (20.1, 21.4)                     | 17.5 (16.5, 18.6) | 19.8 (19.0, 20.5) | 22.4 (21.7, 23.0) | 24.1 (23.0, 25.2) |
| urban-rural difference          | 0.4 (-0.3, 1.1)                       | 0.5 (-0.4, 1.4)   | 0.4 (-0.3, 1.2)   | 0.4 (-0.3, 1.1)   | 0.3 (-0.4, 1.1)   | 0.6 (-0.1, 1.2)                       | 0.6 (-0.3, 1.6)   | 0.6 (-0.1, 1.3)   | 0.5 (-0.1, 1.2)   | 0.5 (-0.2, 1.2)   |
| <b>Oceania</b>                  |                                       |                   |                   |                   |                   |                                       |                   |                   |                   |                   |
| <b>Melanesia</b>                |                                       |                   |                   |                   |                   |                                       |                   |                   |                   |                   |
| <b>Fiji</b>                     |                                       |                   |                   |                   |                   |                                       |                   |                   |                   |                   |
| rural                           | 17.2 (15.1, 19.3)                     | 14.7 (11.1, 18.5) | 15.7 (13.6, 17.8) | 18.6 (16.7, 20.5) | 21.6 (19.6, 23.6) | 20.1 (18.8, 21.4)                     | 17.6 (14.4, 20.8) | 18.6 (17.2, 19.9) | 21.5 (20.4, 22.5) | 24.4 (23.3, 25.7) |
| urban                           | 17.6 (15.5, 19.7)                     | 15.2 (11.6, 19.0) | 16.1 (14.0, 18.2) | 18.9 (17.0, 20.9) | 21.9 (19.9, 23.9) | 20.5 (19.2, 21.8)                     | 18.1 (14.9, 21.4) | 19.0 (17.7, 20.3) | 21.8 (20.8, 22.9) | 24.8 (23.6, 25.9) |
| urban-rural difference          | 0.4 (-0.4, 1.1)                       | 0.5 (-0.6, 1.5)   | 0.4 (-0.4, 1.2)   | 0.3 (-0.4, 1.1)   | 0.3 (-0.5, 1.0)   | 0.4 (-0.4, 1.2)                       | 0.5 (-0.5, 1.6)   | 0.4 (-0.4, 1.3)   | 0.4 (-0.4, 1.1)   | 0.3 (-0.5, 1.2)   |
| <b>Papua New Guinea</b>         |                                       |                   |                   |                   |                   |                                       |                   |                   |                   |                   |
| rural                           | 18.8 (16.5, 21.1)                     | 16.2 (12.4, 20.0) | 17.5 (15.1, 19.8) | 20.4 (18.3, 22.6) | 22.4 (20.2, 24.6) | 21.7 (19.8, 23.5)                     | 19.0 (15.3, 22.5) | 20.3 (18.4, 22.2) | 23.2 (21.6, 24.9) | 25.2 (23.4, 26.9) |
| urban                           | 19.1 (16.8, 21.5)                     | 16.5 (12.7, 20.4) | 17.8 (15.4, 20.1) | 20.7 (18.5, 22.9) | 22.6 (20.3, 24.8) | 22.0 (20.1, 23.9)                     | 19.4 (15.8, 22.9) | 20.6 (18.7, 22.6) | 23.6 (21.8, 25.3) | 25.5 (23.6, 27.3) |
| urban-rural difference          | 0.3 (-0.6, 1.1)                       | 0.3 (-0.8, 1.4)   | 0.3 (-0.6, 1.2)   | 0.3 (-0.6, 1.1)   | 0.2 (-0.7, 1.2)   | 0.3 (-0.5, 1.2)                       | 0.4 (-0.7, 1.5)   | 0.3 (-0.6, 1.2)   | 0.3 (-0.5, 1.1)   | 0.3 (-0.6, 1.2)   |
| <b>Solomon Islands</b>          |                                       |                   |                   |                   |                   |                                       |                   |                   |                   |                   |
| rural                           | 17.1 (15.0, 19.3)                     | 14.8 (12.7, 17.1) | 15.3 (13.2, 17.5) | 18.5 (16.4, 20.7) | 21.7 (19.6, 23.9) | 20.0 (18.5, 21.4)                     | 17.7 (16.2, 19.3) | 18.2 (16.7, 19.7) | 21.4 (19.9, 22.9) | 24.6 (23.1, 26.0) |
| urban                           | 17.3 (15.1, 19.4)                     | 15.2 (13.0, 17.5) | 15.5 (13.4, 17.7) | 18.6 (16.4, 20.8) | 21.6 (19.4, 23.8) | 20.2 (18.7, 21.7)                     | 18.2 (16.6, 19.8) | 18.5 (17.0, 20.0) | 21.5 (20.0, 23.1) | 24.6 (23.0, 26.1) |
| urban-rural difference          | 0.2 (-0.6, 0.9)                       | 0.4 (-0.5, 1.3)   | 0.2 (-0.6, 1.0)   | 0.1 (-0.7, 0.8)   | -0.1 (-0.9, 0.7)  | 0.2 (-0.5, 0.9)                       | 0.4 (-0.4, 1.3)   | 0.3 (-0.5, 1.0)   | 0.1 (-0.6, 0.8)   | 0.0 (-0.8, 0.7)   |
| <b>Vanuatu</b>                  |                                       |                   |                   |                   |                   |                                       |                   |                   |                   |                   |
| rural                           | 18.2 (15.8, 20.5)                     | 15.5 (11.6, 19.4) | 16.8 (14.3, 19.1) | 19.7 (17.5, 22.0) | 21.8 (19.5, 24.1) | 20.9 (18.9, 23.0)                     | 18.3 (14.6, 22.0) | 19.6 (17.5, 21.7) | 22.5 (20.6, 24.4) | 24.6 (22.6, 26.6) |
| urban                           | 18.5 (16.1, 20.9)                     | 15.9 (12.0, 19.8) | 17.1 (14.6, 19.5) | 20.0 (17.7, 22.3) | 22.0 (19.7, 24.4) | 21.3 (19.2, 23.4)                     | 18.7 (15.0, 22.4) | 19.9 (17.8, 22.1) | 22.8 (20.9, 24.8) | 24.9 (22.8, 27.0) |
| urban-rural difference          | 0.3 (-0.6, 1.2)                       | 0.4 (-0.8, 1.5)   | 0.3 (-0.6, 1.2)   | 0.3 (-0.6, 1.1)   | 0.3 (-0.7, 1.2)   | 0.4 (-0.5, 1.2)                       | 0.4 (-0.7, 1.5)   | 0.4 (-0.5, 1.3)   | 0.3 (-0.5, 1.2)   | 0.3 (-0.6, 1.2)   |
| <b>Polynesia and Micronesia</b> |                                       |                   |                   |                   |                   |                                       |                   |                   |                   |                   |
| <b>American Samoa</b>           |                                       |                   |                   |                   |                   |                                       |                   |                   |                   |                   |
| rural                           | 19.9 (17.1, 22.7)                     | 17.3 (12.8, 21.7) | 18.4 (15.6, 21.2) | 21.4 (18.7, 24.0) | 24.3 (21.2, 27.3) | 22.7 (20.3, 25.1)                     | 20.1 (15.8, 24.2) | 21.1 (18.7, 23.4) | 24.2 (21.9, 26.4) | 27.1 (24.4, 29.7) |
| urban                           | 20.3 (17.5, 23.1)                     | 17.6 (13.1, 22.0) | 18.7 (15.9, 21.5) | 21.8 (19.1, 24.4) | 24.7 (21.6, 27.8) | 23.1 (20.7, 25.4)                     | 20.5 (16.2, 24.6) | 21.5 (19.2, 23.9) | 24.6 (22.4, 26.8) | 27.5 (24.9, 30.3) |
| urban-rural difference          | 0.4 (-0.5, 1.3)                       | 0.3 (-0.8, 1.5)   | 0.3 (-0.6, 1.3)   | 0.4 (-0.5, 1.3)   | 0.4 (-0.5, 1.4)   | 0.4 (-0.4, 1.3)                       | 0.4 (-0.7, 1.6)   | 0.4 (-0.5, 1.3)   | 0.5 (-0.4, 1.3)   | 0.5 (-0.5, 1.4)   |
| <b>Cook Islands</b>             |                                       |                   |                   |                   |                   |                                       |                   |                   |                   |                   |
| rural                           | 21.5 (19.1, 23.8)                     | 18.7 (14.5, 22.8) | 19.8 (17.4, 22.1) | 23.1 (20.9, 25.2) | 26.5 (23.9, 29.0) | 24.6 (23.1, 26.1)                     | 21.8 (18.1, 25.6) | 22.9 (21.4, 24.4) | 26.2 (25.0, 27.4) | 29.6 (27.9, 31.2) |
| urban                           | 21.9 (19.5, 24.2)                     | 19.0 (14.8, 23.1) | 20.1 (17.8, 22.4) | 23.5 (21.3, 25.6) | 26.9 (24.5, 29.4) | 25.1 (23.7, 26.5)                     | 22.2 (18.5, 26.0) | 23.3 (21.9, 24.7) | 26.7 (25.5, 27.8) | 30.1 (28.5, 31.7) |
| urban-rural difference          | 0.4 (-0.5, 1.3)                       | 0.3 (-0.8, 1.5)   | 0.4 (-0.6, 1.3)   | 0.4 (-0.4, 1.3)   | 0.4 (-0.5, 1.4)   | 0.5 (-0.4, 1.3)                       | 0.4 (-0.7, 1.6)   | 0.5 (-0.4, 1.4)   | 0.5 (-0.3, 1.3)   | 0.5 (-0.4, 1.5)   |
| <b>French Polynesia</b>         |                                       |                   |                   |                   |                   |                                       |                   |                   |                   |                   |
| rural                           | 20.2 (17.8, 22.4)                     | 17.9 (13.9, 21.9) | 18.7 (16.3, 20.9) | 21.5 (19.3, 23.6) | 24.3 (21.9, 26.7) | 22.8 (21.5, 24.2)                     | 20.6 (17.0, 24.2) | 21.3 (20.0, 22.7) | 24.1 (23.0, 25.2) | 27.0 (25.4, 28.6) |
| urban                           | 20.5 (18.2, 22.7)                     | 18.3 (14.2, 22.3) | 19.0 (16.7, 21.2) | 21.8 (19.6, 24.0) | 24.7 (22.3, 27.0) | 23.3 (21.9, 24.6)                     | 21.0 (17.4, 24.6) | 21.8 (20.4, 23.0) | 24.6 (23.5, 25.7) | 27.5 (25.9, 29.0) |
| urban-rural difference          | 0.4 (-0.5, 1.3)                       | 0.3 (-0.8, 1.5)   | 0.4 (-0.6, 1.3)   | 0.4 (-0.5, 1.3)   | 0.4 (-0.6, 1.4)   | 0.4 (-0.4, 1.3)                       | 0.4 (-0.7, 1.6)   | 0.4 (-0.5, 1.4)   | 0.5 (-0.4, 1.3)   | 0.5 (-0.5, 1.4)   |
| <b>Kiribati</b>                 |                                       |                   |                   |                   |                   |                                       |                   |                   |                   |                   |
| rural                           | 19.4 (17.2, 21.6)                     | 16.8 (12.7, 21.0) | 17.9 (15.6, 20.2) | 20.9 (18.9, 23.0) | 23.8 (21.6, 25.8) | 22.1 (20.4, 23.7)                     | 19.4 (15.7, 23.3) | 20.5 (18.8, 22.2) | 23.5 (22.0, 25.0) | 26.4 (24.9, 27.9) |
| urban                           | 19.8 (17.6, 22.0)                     | 17.2 (13.1, 21.4) | 18.3 (16.0, 20.6) | 21.3 (19.2, 23.4) | 24.2 (22.0, 26.3) | 22.5 (20.8, 24.2)                     | 19.9 (16.1, 23.9) | 21.0 (19.1, 22.7) | 24.0 (22.5, 25.5) | 26.8 (25.3, 28.4) |



| Boys                                    | Mean BMI in 1990 (kg/m <sup>2</sup> ) |                   |                   |                   |                   | Mean BMI in 2020 (kg/m <sup>2</sup> ) |                   |                   |                   |                   |
|-----------------------------------------|---------------------------------------|-------------------|-------------------|-------------------|-------------------|---------------------------------------|-------------------|-------------------|-------------------|-------------------|
|                                         | Age-standardised                      | 5 years           | 10 years          | 15 years          | 19 years          | Age-standardised                      | 5 years           | 10 years          | 15 years          | 19 years          |
| urban-rural difference                  | 0.4 (-0.5, 1.3)                       | 0.3 (-0.8, 1.4)   | 0.4 (-0.6, 1.3)   | 0.4 (-0.5, 1.3)   | 0.4 (-0.5, 1.4)   | 0.4 (-0.4, 1.3)                       | 0.4 (-0.7, 1.6)   | 0.4 (-0.5, 1.4)   | 0.5 (-0.4, 1.3)   | 0.5 (-0.4, 1.4)   |
| <b>Marshall Islands</b>                 |                                       |                   |                   |                   |                   |                                       |                   |                   |                   |                   |
| rural                                   | 17.8 (15.5, 20.0)                     | 15.2 (11.0, 19.3) | 16.3 (14.0, 18.5) | 19.3 (17.2, 21.3) | 21.8 (19.6, 23.9) | 20.5 (18.8, 22.2)                     | 17.9 (14.0, 21.8) | 19.1 (17.3, 20.8) | 22.0 (20.6, 23.5) | 24.5 (23.0, 26.0) |
| urban                                   | 18.1 (15.9, 20.3)                     | 15.5 (11.3, 19.6) | 16.7 (14.4, 18.9) | 19.6 (17.7, 21.6) | 22.1 (20.1, 24.1) | 20.9 (19.3, 22.6)                     | 18.3 (14.3, 22.2) | 19.5 (17.8, 21.2) | 22.4 (21.0, 23.9) | 24.9 (23.6, 26.2) |
| urban-rural difference                  | 0.3 (-0.5, 1.2)                       | 0.3 (-0.8, 1.5)   | 0.3 (-0.6, 1.2)   | 0.3 (-0.5, 1.2)   | 0.3 (-0.6, 1.3)   | 0.4 (-0.5, 1.3)                       | 0.4 (-0.8, 1.5)   | 0.4 (-0.5, 1.3)   | 0.4 (-0.4, 1.2)   | 0.4 (-0.5, 1.3)   |
| <b>Micronesia (Federated States of)</b> |                                       |                   |                   |                   |                   |                                       |                   |                   |                   |                   |
| rural                                   | 18.4 (16.0, 20.6)                     | 15.6 (11.3, 19.8) | 17.1 (14.7, 19.4) | 20.1 (17.9, 22.1) | 21.5 (19.2, 23.7) | 20.9 (19.2, 22.6)                     | 18.1 (14.1, 22.1) | 19.6 (17.9, 21.3) | 22.6 (21.1, 24.0) | 24.0 (22.5, 25.5) |
| urban                                   | 18.9 (16.5, 21.1)                     | 16.0 (11.7, 20.3) | 17.6 (15.2, 19.8) | 20.6 (18.4, 22.7) | 22.1 (19.8, 24.3) | 21.4 (19.7, 23.2)                     | 18.6 (14.6, 22.6) | 20.1 (18.3, 21.9) | 23.2 (21.6, 24.7) | 24.7 (23.1, 26.2) |
| urban-rural difference                  | 0.5 (-0.3, 1.3)                       | 0.4 (-0.8, 1.5)   | 0.5 (-0.4, 1.3)   | 0.5 (-0.3, 1.3)   | 0.6 (-0.3, 1.5)   | 0.6 (-0.3, 1.4)                       | 0.5 (-0.7, 1.6)   | 0.5 (-0.3, 1.4)   | 0.6 (-0.2, 1.4)   | 0.7 (-0.2, 1.5)   |
| <b>Nauru</b>                            |                                       |                   |                   |                   |                   |                                       |                   |                   |                   |                   |
| rural                                   | 21.3 (18.8, 23.6)                     | 18.7 (14.5, 23.0) | 19.6 (17.1, 21.9) | 22.7 (20.4, 24.9) | 26.1 (23.7, 28.4) | 24.2 (22.3, 26.0)                     | 21.6 (17.8, 25.7) | 22.5 (20.6, 24.4) | 25.6 (23.9, 27.3) | 29.0 (27.2, 30.8) |
| urban                                   | 21.7 (19.4, 24.0)                     | 19.0 (14.9, 23.4) | 20.0 (17.7, 22.3) | 23.1 (21.0, 25.3) | 26.6 (24.3, 28.8) | 24.7 (22.8, 26.5)                     | 22.0 (18.2, 26.1) | 23.0 (21.1, 24.8) | 26.1 (24.5, 27.6) | 29.6 (27.9, 31.2) |
| urban-rural difference                  | 0.4 (-0.4, 1.3)                       | 0.4 (-0.8, 1.5)   | 0.4 (-0.5, 1.3)   | 0.4 (-0.4, 1.3)   | 0.5 (-0.5, 1.4)   | 0.5 (-0.3, 1.4)                       | 0.4 (-0.7, 1.6)   | 0.5 (-0.4, 1.4)   | 0.5 (-0.3, 1.4)   | 0.6 (-0.4, 1.5)   |
| <b>Niue</b>                             |                                       |                   |                   |                   |                   |                                       |                   |                   |                   |                   |
| rural                                   | 21.5 (19.1, 23.7)                     | 18.9 (14.8, 23.1) | 19.9 (17.5, 22.1) | 23.0 (20.7, 25.1) | 25.9 (23.3, 28.3) | 24.5 (23.2, 25.8)                     | 21.9 (18.3, 25.6) | 22.9 (21.6, 24.2) | 26.0 (24.9, 27.1) | 28.9 (27.3, 30.4) |
| urban                                   | 21.9 (19.5, 24.1)                     | 19.2 (15.1, 23.5) | 20.3 (17.9, 22.5) | 23.4 (21.1, 25.5) | 26.3 (23.8, 28.7) | 24.9 (23.5, 26.3)                     | 22.3 (18.7, 26.1) | 23.3 (22.0, 24.7) | 26.4 (25.3, 27.6) | 29.3 (27.8, 31.0) |
| urban-rural difference                  | 0.4 (-0.5, 1.2)                       | 0.3 (-0.8, 1.5)   | 0.3 (-0.6, 1.3)   | 0.4 (-0.5, 1.2)   | 0.4 (-0.6, 1.3)   | 0.4 (-0.4, 1.3)                       | 0.4 (-0.8, 1.5)   | 0.4 (-0.5, 1.3)   | 0.4 (-0.4, 1.3)   | 0.5 (-0.5, 1.4)   |
| <b>Palau</b>                            |                                       |                   |                   |                   |                   |                                       |                   |                   |                   |                   |
| rural                                   | 20.1 (17.5, 22.8)                     | 17.5 (13.3, 22.1) | 18.6 (15.9, 21.3) | 21.6 (19.1, 24.1) | 24.6 (21.8, 27.5) | 22.9 (20.8, 25.1)                     | 20.3 (16.4, 24.5) | 21.3 (19.2, 23.6) | 24.4 (22.4, 26.4) | 27.4 (25.2, 29.7) |
| urban                                   | 20.5 (17.8, 23.2)                     | 17.9 (13.5, 22.3) | 18.9 (16.3, 21.6) | 22.0 (19.5, 24.5) | 25.0 (22.2, 27.8) | 23.4 (21.2, 25.5)                     | 20.7 (16.7, 24.9) | 21.8 (19.6, 23.9) | 24.9 (22.8, 26.8) | 27.9 (25.7, 30.2) |
| urban-rural difference                  | 0.4 (-0.5, 1.3)                       | 0.3 (-0.8, 1.5)   | 0.3 (-0.6, 1.3)   | 0.4 (-0.5, 1.2)   | 0.4 (-0.5, 1.3)   | 0.4 (-0.4, 1.3)                       | 0.4 (-0.7, 1.5)   | 0.4 (-0.5, 1.3)   | 0.5 (-0.4, 1.3)   | 0.5 (-0.5, 1.4)   |
| <b>Samoa</b>                            |                                       |                   |                   |                   |                   |                                       |                   |                   |                   |                   |
| rural                                   | 19.2 (16.7, 21.7)                     | 16.6 (12.4, 21.0) | 17.7 (15.1, 20.1) | 20.7 (18.3, 22.9) | 23.6 (21.1, 25.9) | 21.9 (20.1, 23.7)                     | 19.3 (15.4, 23.2) | 20.3 (18.5, 22.2) | 23.4 (21.8, 24.9) | 26.3 (24.7, 27.9) |
| urban                                   | 19.6 (17.1, 22.0)                     | 17.0 (12.7, 21.3) | 18.1 (15.5, 20.5) | 21.1 (18.8, 23.4) | 24.1 (21.6, 26.4) | 22.3 (20.6, 24.2)                     | 19.7 (16.0, 23.7) | 20.8 (18.9, 22.7) | 23.8 (22.2, 25.5) | 26.8 (25.0, 28.5) |
| urban-rural difference                  | 0.4 (-0.5, 1.3)                       | 0.3 (-0.8, 1.5)   | 0.4 (-0.5, 1.3)   | 0.4 (-0.4, 1.3)   | 0.4 (-0.5, 1.4)   | 0.5 (-0.4, 1.3)                       | 0.4 (-0.7, 1.6)   | 0.5 (-0.5, 1.4)   | 0.5 (-0.4, 1.3)   | 0.5 (-0.4, 1.5)   |
| <b>Tokelau</b>                          |                                       |                   |                   |                   |                   |                                       |                   |                   |                   |                   |
| rural                                   | 21.0 (18.5, 23.3)                     | 18.4 (14.1, 22.5) | 19.3 (16.8, 21.7) | 22.4 (20.1, 24.6) | 25.6 (23.1, 28.1) | 23.8 (21.8, 25.7)                     | 21.2 (17.3, 25.1) | 22.1 (20.2, 24.1) | 25.2 (23.5, 26.9) | 28.4 (26.3, 30.5) |
| urban                                   | 21.3 (18.7, 23.7)                     | 18.7 (14.4, 23.0) | 19.6 (17.1, 22.1) | 22.8 (20.3, 25.0) | 26.0 (23.3, 28.5) | 24.2 (22.2, 26.2)                     | 21.5 (17.6, 25.5) | 22.5 (20.6, 24.5) | 25.6 (23.8, 27.5) | 28.8 (26.7, 31.0) |
| urban-rural difference                  | 0.3 (-0.6, 1.2)                       | 0.3 (-0.8, 1.4)   | 0.3 (-0.6, 1.2)   | 0.3 (-0.5, 1.2)   | 0.3 (-0.6, 1.3)   | 0.4 (-0.5, 1.3)                       | 0.4 (-0.8, 1.5)   | 0.4 (-0.5, 1.3)   | 0.4 (-0.5, 1.2)   | 0.4 (-0.5, 1.4)   |
| <b>Tonga</b>                            |                                       |                   |                   |                   |                   |                                       |                   |                   |                   |                   |
| rural                                   | 20.4 (18.2, 22.5)                     | 17.7 (14.0, 21.6) | 18.7 (16.4, 20.8) | 21.9 (19.8, 23.8) | 25.3 (23.1, 27.4) | 23.3 (22.2, 24.4)                     | 20.7 (17.5, 23.9) | 21.6 (20.6, 22.7) | 24.8 (24.0, 25.7) | 28.2 (27.2, 29.3) |
| urban                                   | 20.8 (18.5, 22.9)                     | 18.1 (14.3, 22.1) | 19.1 (16.9, 21.3) | 22.3 (20.2, 24.3) | 25.7 (23.5, 27.9) | 23.8 (22.6, 25.1)                     | 21.1 (17.8, 24.6) | 22.1 (20.9, 23.3) | 25.3 (24.3, 26.3) | 28.7 (27.5, 30.0) |
| urban-rural difference                  | 0.4 (-0.4, 1.3)                       | 0.4 (-0.7, 1.6)   | 0.4 (-0.5, 1.3)   | 0.4 (-0.4, 1.3)   | 0.4 (-0.5, 1.4)   | 0.5 (-0.4, 1.4)                       | 0.5 (-0.6, 1.6)   | 0.5 (-0.4, 1.4)   | 0.5 (-0.4, 1.4)   | 0.5 (-0.4, 1.5)   |
| <b>Tuvalu</b>                           |                                       |                   |                   |                   |                   |                                       |                   |                   |                   |                   |
| rural                                   | 20.4 (17.9, 22.7)                     | 17.7 (13.5, 21.9) | 18.6 (16.2, 21.0) | 21.8 (19.5, 24.0) | 25.4 (23.0, 27.7) | 23.2 (21.6, 24.7)                     | 20.6 (16.9, 24.4) | 21.5 (19.9, 23.0) | 24.6 (23.3, 26.0) | 28.2 (26.8, 29.7) |
| urban                                   | 20.7 (18.3, 23.1)                     | 18.1 (13.8, 22.3) | 19.0 (16.6, 21.4) | 22.2 (19.9, 24.3) | 25.8 (23.4, 28.1) | 23.6 (22.1, 25.1)                     | 21.0 (17.3, 24.8) | 21.9 (20.3, 23.5) | 25.1 (23.8, 26.4) | 28.7 (27.3, 30.1) |
| urban-rural difference                  | 0.4 (-0.5, 1.3)                       | 0.3 (-0.8, 1.4)   | 0.3 (-0.6, 1.3)   | 0.4 (-0.5, 1.2)   | 0.4 (-0.6, 1.4)   | 0.4 (-0.4, 1.3)                       | 0.4 (-0.7, 1.5)   | 0.4 (-0.5, 1.3)   | 0.5 (-0.4, 1.3)   | 0.5 (-0.4, 1.4)   |
| <b>South Asia</b>                       |                                       |                   |                   |                   |                   |                                       |                   |                   |                   |                   |
| <b>Afghanistan</b>                      |                                       |                   |                   |                   |                   |                                       |                   |                   |                   |                   |
| rural                                   | 16.5 (14.6, 18.3)                     | 14.0 (10.9, 17.2) | 15.1 (13.2, 17.0) | 17.9 (16.2, 19.7) | 20.2 (18.4, 21.9) | 18.7 (17.4, 20.0)                     | 16.2 (13.3, 19.1) | 17.4 (15.9, 18.8) | 20.2 (18.9, 21.4) | 22.4 (21.3, 23.5) |
| urban                                   | 17.1 (15.2, 18.9)                     | 14.5 (11.3, 17.7) | 15.7 (13.8, 17.6) | 18.5 (16.8, 20.3) | 20.8 (19.0, 22.5) | 19.3 (17.9, 20.6)                     | 16.7 (13.8, 19.7) | 17.9 (16.4, 19.4) | 20.7 (19.5, 22.0) | 23.0 (21.9, 24.0) |
| urban-rural difference                  | 0.6 (-0.1, 1.3)                       | 0.6 (-0.3, 1.5)   | 0.6 (-0.2, 1.3)   | 0.6 (-0.1, 1.3)   | 0.6 (-0.2, 1.4)   | 0.5 (-0.1, 1.2)                       | 0.5 (-0.4, 1.4)   | 0.5 (-0.2, 1.2)   | 0.6 (-0.1, 1.2)   | 0.6 (-0.1, 1.2)   |
| <b>Bangladesh</b>                       |                                       |                   |                   |                   |                   |                                       |                   |                   |                   |                   |
| rural                                   | 14.8 (13.3, 16.4)                     | 11.8 (9.3, 14.2)  | 13.4 (11.8, 14.9) | 16.5 (15.0, 18.0) | 18.8 (17.2, 20.4) | 16.8 (16.1, 17.5)                     | 13.8 (11.8, 15.7) | 15.4 (14.7, 16.0) | 18.5 (17.9, 19.1) | 20.8 (20.1, 21.5) |
| urban                                   | 15.5 (13.9, 17.1)                     | 12.7 (10.2, 15.1) | 14.2 (12.6, 15.7) | 17.2 (15.6, 18.7) | 19.4 (17.7, 21.0) | 17.5 (16.8, 18.2)                     | 14.6 (12.6, 16.6) | 16.1 (15.4, 16.8) | 19.1 (18.5, 19.8) | 21.4 (20.6, 22.1) |
| urban-rural difference                  | 0.7 (0.1, 1.4)                        | 0.9 (0.0, 1.7)    | 0.8 (0.1, 1.5)    | 0.7 (0.0, 1.3)    | 0.6 (-0.1, 1.3)   | 0.7 (0.2, 1.2)                        | 0.9 (0.1, 1.6)    | 0.7 (0.2, 1.3)    | 0.6 (0.2, 1.1)    | 0.5 (0.0, 1.1)    |
| <b>Bhutan</b>                           |                                       |                   |                   |                   |                   |                                       |                   |                   |                   |                   |
| rural                                   | 15.9 (14.1, 17.6)                     | 13.3 (10.1, 16.3) | 14.6 (12.8, 16.4) | 17.4 (15.8, 19.0) | 19.1 (17.5, 20.7) | 18.1 (17.0, 19.2)                     | 15.5 (12.6, 18.3) | 16.8 (15.7, 18.0) | 19.7 (18.8, 20.5) | 21.3 (20.5, 22.2) |
| urban                                   | 16.5 (14.7, 18.2)                     | 13.9 (10.8, 16.9) | 15.2 (13.4, 17.0) | 18.0 (16.3, 19.6) | 19.6 (18.0, 21.2) | 18.6 (17.5, 19.7)                     | 16.1 (13.1, 18.9) | 17.4 (16.2, 18.6) | 20.2 (19.2, 21.1) | 21.8 (20.8, 22.7) |
| urban-rural difference                  | 0.6 (-0.1, 1.3)                       | 0.6 (-0.3, 1.6)   | 0.6 (-0.2, 1.3)   | 0.6 (-0.1, 1.3)   | 0.6 (-0.2, 1.3)   | 0.5 (-0.1, 1.1)                       | 0.6 (-0.4, 1.5)   | 0.5 (-0.2, 1.2)   | 0.5 (-0.1, 1.1)   | 0.5 (-0.2, 1.2)   |
| <b>India</b>                            |                                       |                   |                   |                   |                   |                                       |                   |                   |                   |                   |

| Boys                            | Mean BMI in 1990 (kg/m <sup>2</sup> ) |                   |                   |                   |                   | Mean BMI in 2020 (kg/m <sup>2</sup> ) |                   |                   |                   |                   |
|---------------------------------|---------------------------------------|-------------------|-------------------|-------------------|-------------------|---------------------------------------|-------------------|-------------------|-------------------|-------------------|
|                                 | Age-standardised                      | 5 years           | 10 years          | 15 years          | 19 years          | Age-standardised                      | 5 years           | 10 years          | 15 years          | 19 years          |
| rural                           | 15.2 (14.6, 15.7)                     | 13.1 (12.5, 13.7) | 14.0 (13.4, 14.5) | 16.4 (15.9, 17.0) | 18.4 (17.8, 18.9) | 17.1 (16.6, 17.5)                     | 15.0 (14.5, 15.5) | 15.9 (15.4, 16.4) | 18.4 (17.9, 18.8) | 20.3 (19.8, 20.7) |
| urban                           | 15.9 (15.2, 16.6)                     | 13.5 (12.8, 14.3) | 14.6 (13.9, 15.3) | 17.3 (16.6, 18.0) | 19.4 (18.7, 20.1) | 17.7 (17.2, 18.1)                     | 15.3 (14.8, 15.8) | 16.4 (15.9, 16.8) | 19.0 (18.6, 19.5) | 21.1 (20.6, 21.6) |
| urban-rural difference          | 0.7 (0.4, 1.2)                        | 0.4 (0.0, 0.9)    | 0.6 (0.3, 1.1)    | 0.8 (0.5, 1.3)    | 1.0 (0.6, 1.5)    | 0.6 (0.3, 0.8)                        | 0.3 (0.0, 0.6)    | 0.5 (0.2, 0.8)    | 0.7 (0.4, 0.9)    | 0.9 (0.6, 1.1)    |
| <b>Nepal</b>                    |                                       |                   |                   |                   |                   |                                       |                   |                   |                   |                   |
| rural                           | 15.6 (14.0, 17.2)                     | 13.1 (10.0, 16.1) | 14.3 (12.7, 15.9) | 17.1 (15.6, 18.5) | 18.7 (17.2, 20.2) | 18.1 (17.1, 19.1)                     | 15.6 (12.7, 18.4) | 16.8 (15.8, 17.8) | 19.6 (19.0, 20.3) | 21.2 (20.6, 21.9) |
| urban                           | 16.6 (15.0, 18.2)                     | 13.9 (10.9, 17.0) | 15.3 (13.6, 16.9) | 18.2 (16.7, 19.6) | 19.9 (18.3, 21.3) | 19.2 (18.2, 20.1)                     | 16.5 (13.7, 19.4) | 17.9 (16.9, 18.9) | 20.8 (20.2, 21.4) | 22.5 (21.8, 23.1) |
| urban-rural difference          | 1.0 (0.3, 1.6)                        | 0.9 (0.0, 1.8)    | 1.0 (0.3, 1.7)    | 1.1 (0.4, 1.6)    | 1.1 (0.5, 1.7)    | 1.1 (0.6, 1.6)                        | 1.0 (0.2, 1.8)    | 1.1 (0.5, 1.6)    | 1.2 (0.8, 1.6)    | 1.2 (0.8, 1.7)    |
| <b>Pakistan</b>                 |                                       |                   |                   |                   |                   |                                       |                   |                   |                   |                   |
| rural                           | 15.9 (15.2, 16.5)                     | 14.1 (13.3, 14.8) | 14.5 (13.8, 15.2) | 17.1 (16.5, 17.8) | 19.2 (18.5, 20.0) | 17.9 (17.2, 18.5)                     | 16.1 (15.3, 16.8) | 16.5 (15.8, 17.1) | 19.1 (18.5, 19.8) | 21.2 (20.5, 22.0) |
| urban                           | 16.3 (15.6, 16.9)                     | 14.3 (13.5, 15.0) | 14.8 (14.1, 15.5) | 17.6 (16.9, 18.3) | 19.8 (19.1, 20.6) | 18.2 (17.5, 18.9)                     | 16.2 (15.5, 17.0) | 16.8 (16.1, 17.4) | 19.6 (18.9, 20.2) | 21.8 (21.1, 22.5) |
| urban-rural difference          | 0.4 (-0.1, 0.9)                       | 0.2 (-0.3, 0.7)   | 0.3 (-0.1, 0.8)   | 0.5 (0.0, 0.9)    | 0.6 (0.1, 1.1)    | 0.4 (0.0, 0.7)                        | 0.2 (-0.3, 0.6)   | 0.3 (-0.1, 0.7)   | 0.4 (0.0, 0.8)    | 0.5 (0.1, 1.0)    |
| <b>Sri Lanka</b>                |                                       |                   |                   |                   |                   |                                       |                   |                   |                   |                   |
| rural                           | 15.8 (14.2, 17.4)                     | 13.3 (10.2, 16.4) | 14.5 (12.9, 16.1) | 17.2 (15.8, 18.7) | 19.2 (17.6, 20.8) | 18.1 (16.9, 19.2)                     | 15.6 (12.7, 18.4) | 16.8 (15.6, 17.9) | 19.5 (18.6, 20.5) | 21.5 (20.3, 22.6) |
| urban                           | 16.4 (14.7, 18.1)                     | 13.9 (10.7, 17.0) | 15.1 (13.4, 16.8) | 17.9 (16.3, 19.4) | 19.8 (18.2, 21.5) | 18.6 (17.4, 19.8)                     | 16.1 (13.2, 18.9) | 17.3 (16.0, 18.6) | 20.1 (19.1, 21.2) | 22.1 (20.8, 23.4) |
| urban-rural difference          | 0.6 (-0.1, 1.3)                       | 0.6 (-0.4, 1.5)   | 0.6 (-0.1, 1.3)   | 0.6 (-0.1, 1.3)   | 0.7 (-0.1, 1.4)   | 0.6 (-0.1, 1.2)                       | 0.5 (-0.4, 1.5)   | 0.6 (-0.2, 1.3)   | 0.6 (-0.1, 1.2)   | 0.6 (-0.1, 1.3)   |
| <b>Sub-Saharan Africa</b>       |                                       |                   |                   |                   |                   |                                       |                   |                   |                   |                   |
| <i>Central Africa</i>           |                                       |                   |                   |                   |                   |                                       |                   |                   |                   |                   |
| <b>Angola</b>                   |                                       |                   |                   |                   |                   |                                       |                   |                   |                   |                   |
| rural                           | 16.2 (14.2, 18.3)                     | 14.0 (10.6, 17.4) | 15.0 (13.0, 17.0) | 17.7 (15.8, 19.6) | 19.1 (17.1, 21.2) | 17.9 (16.2, 19.6)                     | 15.7 (12.4, 18.9) | 16.7 (14.9, 18.4) | 19.3 (17.8, 20.9) | 20.8 (19.1, 22.5) |
| urban                           | 16.6 (14.6, 18.6)                     | 14.4 (11.1, 17.9) | 15.4 (13.4, 17.4) | 18.0 (16.1, 19.9) | 19.4 (17.4, 21.4) | 18.1 (16.4, 19.8)                     | 15.9 (12.7, 19.1) | 16.9 (15.2, 18.6) | 19.5 (18.0, 21.0) | 20.9 (19.3, 22.5) |
| urban-rural difference          | 0.4 (-0.4, 1.2)                       | 0.4 (-0.6, 1.5)   | 0.4 (-0.5, 1.2)   | 0.4 (-0.4, 1.2)   | 0.3 (-0.5, 1.2)   | 0.2 (-0.6, 0.9)                       | 0.2 (-0.8, 1.3)   | 0.2 (-0.6, 1.0)   | 0.2 (-0.5, 0.8)   | 0.1 (-0.6, 0.9)   |
| <b>Central African Republic</b> |                                       |                   |                   |                   |                   |                                       |                   |                   |                   |                   |
| rural                           | 16.3 (13.8, 18.8)                     | 14.1 (10.4, 17.7) | 15.1 (12.6, 17.6) | 17.7 (15.4, 20.2) | 19.2 (16.4, 22.1) | 18.0 (15.6, 20.4)                     | 15.8 (12.0, 19.4) | 16.8 (14.3, 19.2) | 19.4 (17.1, 21.8) | 20.9 (18.1, 23.7) |
| urban                           | 16.7 (14.3, 19.3)                     | 14.6 (10.8, 18.2) | 15.5 (13.1, 18.0) | 18.1 (15.8, 20.6) | 19.6 (16.8, 22.5) | 18.2 (15.8, 20.7)                     | 16.1 (12.4, 19.7) | 17.0 (14.6, 19.5) | 19.6 (17.4, 22.0) | 21.1 (18.3, 24.0) |
| urban-rural difference          | 0.4 (-0.4, 1.2)                       | 0.4 (-0.6, 1.5)   | 0.4 (-0.4, 1.3)   | 0.4 (-0.4, 1.2)   | 0.4 (-0.5, 1.3)   | 0.3 (-0.5, 1.0)                       | 0.3 (-0.7, 1.4)   | 0.3 (-0.5, 1.1)   | 0.3 (-0.5, 1.0)   | 0.2 (-0.6, 1.0)   |
| <b>Congo</b>                    |                                       |                   |                   |                   |                   |                                       |                   |                   |                   |                   |
| rural                           | 16.3 (15.0, 17.7)                     | 14.5 (13.0, 16.1) | 15.0 (13.6, 16.4) | 17.6 (16.2, 18.9) | 19.5 (18.0, 21.0) | 18.0 (16.3, 19.7)                     | 16.2 (14.3, 18.1) | 16.7 (14.9, 18.4) | 19.3 (17.5, 21.0) | 21.2 (19.3, 22.9) |
| urban                           | 16.7 (15.6, 17.9)                     | 14.9 (13.7, 16.1) | 15.4 (14.2, 16.6) | 18.0 (16.8, 19.2) | 19.9 (18.6, 21.1) | 18.3 (16.6, 19.9)                     | 16.4 (14.7, 18.2) | 16.9 (15.3, 18.6) | 19.5 (17.8, 21.2) | 21.4 (19.7, 23.1) |
| urban-rural difference          | 0.4 (-0.4, 1.2)                       | 0.4 (-0.6, 1.5)   | 0.4 (-0.4, 1.3)   | 0.4 (-0.4, 1.2)   | 0.4 (-0.5, 1.3)   | 0.2 (-0.5, 1.0)                       | 0.2 (-0.8, 1.3)   | 0.2 (-0.6, 1.0)   | 0.2 (-0.5, 1.0)   | 0.2 (-0.6, 1.1)   |
| <b>DR Congo</b>                 |                                       |                   |                   |                   |                   |                                       |                   |                   |                   |                   |
| rural                           | 15.8 (14.0, 17.6)                     | 13.2 (10.1, 16.2) | 14.6 (12.8, 16.4) | 17.4 (15.7, 19.1) | 18.7 (17.0, 20.5) | 17.6 (16.1, 19.1)                     | 14.9 (12.1, 17.9) | 16.4 (14.8, 17.9) | 19.1 (17.7, 20.5) | 20.5 (19.1, 21.8) |
| urban                           | 16.2 (14.5, 18.0)                     | 13.6 (10.6, 16.6) | 15.1 (13.3, 16.8) | 17.8 (16.2, 19.5) | 19.2 (17.4, 20.8) | 17.8 (16.4, 19.3)                     | 15.2 (12.4, 18.0) | 16.6 (15.2, 18.1) | 19.4 (18.1, 20.8) | 20.7 (19.4, 22.1) |
| urban-rural difference          | 0.4 (-0.4, 1.2)                       | 0.4 (-0.7, 1.5)   | 0.4 (-0.4, 1.3)   | 0.4 (-0.3, 1.2)   | 0.4 (-0.4, 1.3)   | 0.3 (-0.5, 1.0)                       | 0.2 (-0.8, 1.3)   | 0.3 (-0.5, 1.0)   | 0.3 (-0.4, 1.0)   | 0.3 (-0.5, 1.0)   |
| <b>Equatorial Guinea</b>        |                                       |                   |                   |                   |                   |                                       |                   |                   |                   |                   |
| rural                           | 16.3 (13.9, 18.9)                     | 14.1 (10.5, 17.8) | 15.1 (12.7, 17.6) | 17.7 (15.4, 20.1) | 19.2 (16.5, 22.1) | 18.0 (15.6, 20.4)                     | 15.8 (12.2, 19.5) | 16.8 (14.4, 19.2) | 19.4 (17.1, 21.7) | 20.9 (18.2, 23.7) |
| urban                           | 16.7 (14.3, 19.2)                     | 14.5 (10.9, 18.1) | 15.5 (13.1, 18.0) | 18.1 (15.7, 20.5) | 19.7 (16.9, 22.5) | 18.3 (15.9, 20.6)                     | 16.1 (12.5, 19.6) | 17.0 (14.7, 19.4) | 19.7 (17.4, 21.9) | 21.2 (18.5, 23.9) |
| urban-rural difference          | 0.4 (-0.4, 1.2)                       | 0.4 (-0.6, 1.5)   | 0.4 (-0.4, 1.3)   | 0.4 (-0.4, 1.2)   | 0.4 (-0.5, 1.3)   | 0.3 (-0.5, 1.0)                       | 0.3 (-0.8, 1.3)   | 0.3 (-0.6, 1.1)   | 0.3 (-0.5, 1.0)   | 0.2 (-0.6, 1.1)   |
| <b>Gabon</b>                    |                                       |                   |                   |                   |                   |                                       |                   |                   |                   |                   |
| rural                           | 16.6 (14.5, 18.6)                     | 14.3 (10.8, 17.7) | 15.5 (13.3, 17.5) | 18.1 (16.1, 20.0) | 19.1 (16.9, 21.2) | 18.3 (16.4, 20.2)                     | 16.0 (12.7, 19.5) | 17.2 (15.3, 19.2) | 19.8 (18.1, 21.6) | 20.8 (18.9, 22.7) |
| urban                           | 17.1 (15.0, 19.0)                     | 14.8 (11.3, 18.2) | 15.9 (13.9, 18.0) | 18.5 (16.6, 20.4) | 19.5 (17.4, 21.5) | 18.6 (16.7, 20.5)                     | 16.4 (13.0, 19.7) | 17.5 (15.6, 19.4) | 20.1 (18.4, 21.8) | 21.0 (19.2, 22.9) |
| urban-rural difference          | 0.5 (-0.3, 1.3)                       | 0.5 (-0.6, 1.6)   | 0.5 (-0.4, 1.3)   | 0.4 (-0.3, 1.3)   | 0.4 (-0.5, 1.3)   | 0.3 (-0.5, 1.1)                       | 0.3 (-0.7, 1.4)   | 0.3 (-0.5, 1.1)   | 0.3 (-0.5, 1.0)   | 0.3 (-0.6, 1.1)   |
| <i>East Africa</i>              |                                       |                   |                   |                   |                   |                                       |                   |                   |                   |                   |
| <b>Burundi</b>                  |                                       |                   |                   |                   |                   |                                       |                   |                   |                   |                   |
| rural                           | 16.5 (14.1, 18.9)                     | 14.5 (11.1, 17.9) | 15.2 (12.8, 17.6) | 17.8 (15.4, 20.0) | 19.6 (16.8, 22.4) | 18.2 (16.0, 20.5)                     | 16.3 (12.8, 19.7) | 17.0 (14.7, 19.2) | 19.5 (17.4, 21.7) | 21.4 (18.9, 24.0) |
| urban                           | 16.9 (14.6, 19.3)                     | 15.1 (11.6, 18.5) | 15.7 (13.3, 18.1) | 18.2 (15.9, 20.5) | 20.0 (17.3, 22.7) | 18.5 (16.3, 20.8)                     | 16.7 (13.2, 20.0) | 17.3 (15.1, 19.6) | 19.8 (17.6, 21.9) | 21.6 (19.1, 24.2) |
| urban-rural difference          | 0.4 (-0.3, 1.2)                       | 0.6 (-0.4, 1.5)   | 0.5 (-0.3, 1.3)   | 0.4 (-0.3, 1.1)   | 0.3 (-0.5, 1.2)   | 0.3 (-0.3, 0.9)                       | 0.4 (-0.5, 1.3)   | 0.3 (-0.4, 1.0)   | 0.2 (-0.4, 0.9)   | 0.2 (-0.5, 0.9)   |
| <b>Comoros</b>                  |                                       |                   |                   |                   |                   |                                       |                   |                   |                   |                   |
| rural                           | 16.5 (14.2, 18.8)                     | 14.5 (11.0, 17.9) | 15.2 (12.9, 17.6) | 17.8 (15.5, 20.0) | 19.6 (17.0, 22.3) | 18.2 (16.0, 20.5)                     | 16.3 (12.9, 19.6) | 17.0 (14.8, 19.3) | 19.5 (17.4, 21.7) | 21.4 (18.8, 24.0) |
| urban                           | 16.9 (14.6, 19.3)                     | 15.1 (11.6, 18.5) | 15.7 (13.4, 18.1) | 18.2 (15.9, 20.5) | 20.0 (17.3, 22.7) | 18.5 (16.3, 20.8)                     | 16.7 (13.3, 20.1) | 17.3 (15.1, 19.6) | 19.8 (17.7, 22.0) | 21.6 (19.0, 24.2) |
| urban-rural difference          | 0.5 (-0.3, 1.2)                       | 0.6 (-0.4, 1.5)   | 0.5 (-0.3, 1.3)   | 0.4 (-0.3, 1.1)   | 0.3 (-0.5, 1.1)   | 0.3 (-0.4, 1.0)                       | 0.4 (-0.6, 1.3)   | 0.3 (-0.4, 1.0)   | 0.2 (-0.4, 0.9)   | 0.2 (-0.5, 0.9)   |
| <b>Djibouti</b>                 |                                       |                   |                   |                   |                   |                                       |                   |                   |                   |                   |

| Boys                   | Mean BMI in 1990 (kg/m <sup>2</sup> ) |                   |                   |                   |                   | Mean BMI in 2020 (kg/m <sup>2</sup> ) |                   |                   |                   |                   |
|------------------------|---------------------------------------|-------------------|-------------------|-------------------|-------------------|---------------------------------------|-------------------|-------------------|-------------------|-------------------|
|                        | Age-standardised                      | 5 years           | 10 years          | 15 years          | 19 years          | Age-standardised                      | 5 years           | 10 years          | 15 years          | 19 years          |
| rural                  | 16.5 (14.1, 18.9)                     | 14.5 (10.9, 18.2) | 15.2 (12.9, 17.7) | 17.8 (15.5, 20.1) | 19.6 (16.9, 22.4) | 18.2 (16.0, 20.4)                     | 16.2 (12.7, 19.7) | 17.0 (14.8, 19.2) | 19.5 (17.4, 21.7) | 21.4 (18.8, 23.9) |
| urban                  | 16.9 (14.6, 19.3)                     | 15.0 (11.5, 18.7) | 15.7 (13.4, 18.1) | 18.2 (15.9, 20.4) | 20.0 (17.3, 22.7) | 18.5 (16.3, 20.8)                     | 16.6 (13.2, 20.1) | 17.3 (15.1, 19.5) | 19.8 (17.6, 21.9) | 21.6 (19.0, 24.1) |
| urban-rural difference | 0.5 (-0.2, 1.2)                       | 0.6 (-0.4, 1.6)   | 0.5 (-0.3, 1.3)   | 0.4 (-0.3, 1.1)   | 0.3 (-0.5, 1.2)   | 0.3 (-0.3, 1.0)                       | 0.4 (-0.5, 1.4)   | 0.3 (-0.4, 1.0)   | 0.3 (-0.4, 0.9)   | 0.2 (-0.5, 0.9)   |
| <b>Eritrea</b>         |                                       |                   |                   |                   |                   |                                       |                   |                   |                   |                   |
| rural                  | 15.8 (14.1, 17.7)                     | 13.8 (10.8, 17.0) | 14.6 (12.8, 16.5) | 17.1 (15.4, 18.7) | 19.0 (17.3, 20.8) | 17.6 (16.0, 19.2)                     | 15.6 (12.6, 18.7) | 16.3 (14.7, 18.0) | 18.9 (17.4, 20.4) | 20.8 (19.2, 22.4) |
| urban                  | 16.3 (14.5, 18.1)                     | 14.4 (11.3, 17.6) | 15.1 (13.2, 16.9) | 17.5 (15.8, 19.2) | 19.4 (17.6, 21.2) | 17.9 (16.2, 19.6)                     | 16.0 (13.0, 19.2) | 16.7 (15.0, 18.4) | 19.1 (17.6, 20.7) | 21.0 (19.3, 22.6) |
| urban-rural difference | 0.5 (-0.3, 1.2)                       | 0.6 (-0.4, 1.6)   | 0.5 (-0.3, 1.3)   | 0.4 (-0.3, 1.1)   | 0.4 (-0.4, 1.2)   | 0.3 (-0.4, 1.0)                       | 0.4 (-0.5, 1.4)   | 0.3 (-0.4, 1.1)   | 0.3 (-0.4, 0.9)   | 0.2 (-0.5, 0.9)   |
| <b>Ethiopia</b>        |                                       |                   |                   |                   |                   |                                       |                   |                   |                   |                   |
| rural                  | 15.0 (13.3, 16.8)                     | 13.0 (9.9, 16.1)  | 13.8 (12.0, 15.6) | 16.3 (14.7, 17.9) | 18.1 (16.5, 19.7) | 16.6 (15.6, 17.7)                     | 14.6 (11.9, 17.4) | 15.4 (14.3, 16.5) | 17.9 (17.1, 18.8) | 19.7 (18.9, 20.6) |
| urban                  | 15.5 (13.8, 17.3)                     | 13.6 (10.5, 16.7) | 14.3 (12.5, 16.1) | 16.7 (15.2, 18.4) | 18.4 (16.9, 20.1) | 17.0 (15.9, 18.1)                     | 15.1 (12.4, 17.9) | 15.8 (14.7, 17.0) | 18.3 (17.4, 19.1) | 20.0 (19.1, 20.8) |
| urban-rural difference | 0.5 (-0.1, 1.2)                       | 0.6 (-0.3, 1.6)   | 0.5 (-0.2, 1.3)   | 0.5 (-0.2, 1.1)   | 0.4 (-0.3, 1.1)   | 0.4 (-0.1, 0.9)                       | 0.5 (-0.3, 1.3)   | 0.4 (-0.2, 1.0)   | 0.3 (-0.1, 0.7)   | 0.2 (-0.2, 0.7)   |
| <b>Kenya</b>           |                                       |                   |                   |                   |                   |                                       |                   |                   |                   |                   |
| rural                  | 16.6 (14.9, 18.4)                     | 14.9 (12.1, 17.7) | 15.4 (13.6, 17.2) | 17.8 (16.1, 19.5) | 19.4 (17.7, 21.2) | 18.4 (17.1, 19.7)                     | 16.7 (14.2, 19.3) | 17.2 (15.8, 18.6) | 19.6 (18.3, 20.9) | 21.2 (20.2, 22.3) |
| urban                  | 17.0 (15.3, 18.7)                     | 15.5 (12.7, 18.3) | 15.9 (14.1, 17.6) | 18.2 (16.5, 19.9) | 19.7 (18.0, 21.5) | 18.7 (17.4, 19.9)                     | 17.1 (14.6, 19.6) | 17.5 (16.2, 18.9) | 19.8 (18.6, 21.0) | 21.4 (20.3, 22.4) |
| urban-rural difference | 0.5 (-0.3, 1.2)                       | 0.6 (-0.4, 1.6)   | 0.5 (-0.3, 1.3)   | 0.4 (-0.3, 1.1)   | 0.3 (-0.5, 1.1)   | 0.3 (-0.3, 0.9)                       | 0.4 (-0.5, 1.4)   | 0.3 (-0.3, 1.0)   | 0.2 (-0.3, 0.8)   | 0.1 (-0.5, 0.8)   |
| <b>Madagascar</b>      |                                       |                   |                   |                   |                   |                                       |                   |                   |                   |                   |
| rural                  | 16.5 (14.1, 18.9)                     | 14.5 (11.1, 18.0) | 15.2 (12.9, 17.6) | 17.8 (15.5, 20.1) | 19.6 (17.0, 22.4) | 18.2 (16.0, 20.4)                     | 16.2 (12.9, 19.6) | 17.0 (14.7, 19.2) | 19.5 (17.4, 21.6) | 21.4 (18.8, 24.0) |
| urban                  | 16.9 (14.5, 19.3)                     | 15.0 (11.6, 18.5) | 15.7 (13.3, 18.1) | 18.2 (15.9, 20.5) | 20.0 (17.3, 22.8) | 18.5 (16.2, 20.7)                     | 16.6 (13.3, 19.9) | 17.3 (15.1, 19.4) | 19.8 (17.6, 21.9) | 21.6 (19.0, 24.1) |
| urban-rural difference | 0.4 (-0.3, 1.2)                       | 0.6 (-0.4, 1.5)   | 0.5 (-0.3, 1.2)   | 0.4 (-0.3, 1.1)   | 0.3 (-0.5, 1.1)   | 0.3 (-0.4, 0.9)                       | 0.4 (-0.6, 1.3)   | 0.3 (-0.4, 1.0)   | 0.2 (-0.4, 0.9)   | 0.2 (-0.5, 0.9)   |
| <b>Malawi</b>          |                                       |                   |                   |                   |                   |                                       |                   |                   |                   |                   |
| rural                  | 16.1 (14.3, 17.9)                     | 14.1 (11.0, 17.3) | 14.8 (12.9, 16.7) | 17.3 (15.6, 19.0) | 19.5 (17.8, 21.3) | 17.8 (16.5, 19.0)                     | 15.8 (12.9, 18.7) | 16.5 (15.1, 17.8) | 19.0 (17.9, 20.1) | 21.2 (20.2, 22.1) |
| urban                  | 16.5 (14.7, 18.3)                     | 14.7 (11.6, 17.8) | 15.3 (13.4, 17.1) | 17.7 (16.0, 19.4) | 19.8 (18.1, 21.5) | 18.0 (16.8, 19.3)                     | 16.2 (13.3, 19.1) | 16.7 (15.4, 18.2) | 19.2 (18.1, 20.3) | 21.3 (20.4, 22.3) |
| urban-rural difference | 0.4 (-0.3, 1.1)                       | 0.5 (-0.4, 1.5)   | 0.5 (-0.3, 1.2)   | 0.4 (-0.3, 1.1)   | 0.3 (-0.4, 1.1)   | 0.3 (-0.4, 0.8)                       | 0.4 (-0.5, 1.3)   | 0.3 (-0.4, 0.9)   | 0.2 (-0.3, 0.7)   | 0.1 (-0.5, 0.7)   |
| <b>Mauritius</b>       |                                       |                   |                   |                   |                   |                                       |                   |                   |                   |                   |
| rural                  | 17.6 (15.9, 19.3)                     | 15.8 (12.8, 18.8) | 16.4 (14.7, 18.1) | 18.8 (17.2, 20.4) | 20.4 (18.4, 22.3) | 19.6 (18.7, 20.6)                     | 17.8 (15.1, 20.5) | 18.5 (17.5, 19.4) | 20.8 (20.1, 21.6) | 22.4 (21.0, 23.7) |
| urban                  | 18.0 (16.3, 19.8)                     | 16.3 (13.3, 19.3) | 16.9 (15.2, 18.6) | 19.2 (17.6, 20.8) | 20.7 (18.7, 22.7) | 19.9 (18.8, 20.9)                     | 18.1 (15.5, 20.8) | 18.7 (17.7, 19.8) | 21.1 (20.2, 21.9) | 22.5 (21.1, 24.0) |
| urban-rural difference | 0.4 (-0.3, 1.2)                       | 0.5 (-0.4, 1.5)   | 0.4 (-0.3, 1.2)   | 0.4 (-0.3, 1.1)   | 0.3 (-0.5, 1.1)   | 0.3 (-0.4, 0.9)                       | 0.3 (-0.6, 1.2)   | 0.3 (-0.4, 1.0)   | 0.2 (-0.4, 0.8)   | 0.2 (-0.6, 0.9)   |
| <b>Mozambique</b>      |                                       |                   |                   |                   |                   |                                       |                   |                   |                   |                   |
| rural                  | 16.8 (15.3, 18.5)                     | 15.1 (12.9, 17.3) | 15.5 (13.9, 17.1) | 18.1 (16.5, 19.7) | 20.2 (18.5, 22.0) | 18.3 (17.3, 19.3)                     | 16.6 (14.7, 18.4) | 17.0 (15.9, 18.0) | 19.5 (18.6, 20.5) | 21.7 (20.6, 22.8) |
| urban                  | 17.4 (15.8, 18.9)                     | 15.7 (13.5, 17.9) | 16.0 (14.5, 17.6) | 18.5 (17.0, 20.1) | 20.6 (19.0, 22.3) | 18.7 (17.7, 19.7)                     | 17.0 (15.3, 18.8) | 17.4 (16.4, 18.4) | 19.9 (18.9, 20.8) | 21.9 (20.8, 23.0) |
| urban-rural difference | 0.5 (-0.1, 1.2)                       | 0.6 (-0.3, 1.5)   | 0.5 (-0.1, 1.3)   | 0.5 (-0.2, 1.1)   | 0.4 (-0.3, 1.1)   | 0.4 (-0.2, 0.9)                       | 0.5 (-0.4, 1.3)   | 0.4 (-0.2, 1.0)   | 0.3 (-0.2, 0.8)   | 0.3 (-0.3, 0.9)   |
| <b>Rwanda</b>          |                                       |                   |                   |                   |                   |                                       |                   |                   |                   |                   |
| rural                  | 16.2 (14.5, 17.9)                     | 14.2 (11.2, 17.3) | 14.8 (13.1, 16.5) | 17.5 (15.9, 19.1) | 19.9 (18.2, 21.4) | 17.9 (16.7, 19.1)                     | 15.9 (13.2, 18.9) | 16.5 (15.3, 17.8) | 19.2 (18.2, 20.2) | 21.6 (20.6, 22.6) |
| urban                  | 16.6 (14.9, 18.3)                     | 14.9 (11.9, 17.9) | 15.3 (13.6, 17.0) | 17.8 (16.2, 19.4) | 20.1 (18.4, 21.7) | 18.2 (17.0, 19.4)                     | 16.4 (13.7, 19.4) | 16.8 (15.6, 18.1) | 19.4 (18.4, 20.3) | 21.6 (20.6, 22.6) |
| urban-rural difference | 0.4 (-0.2, 1.1)                       | 0.7 (-0.3, 1.6)   | 0.5 (-0.2, 1.2)   | 0.3 (-0.3, 0.9)   | 0.2 (-0.5, 0.8)   | 0.3 (-0.2, 0.8)                       | 0.5 (-0.4, 1.4)   | 0.3 (-0.3, 0.9)   | 0.2 (-0.3, 0.6)   | 0.0 (-0.5, 0.5)   |
| <b>Seychelles</b>      |                                       |                   |                   |                   |                   |                                       |                   |                   |                   |                   |
| rural                  | 17.4 (16.2, 18.6)                     | 14.2 (13.0, 15.4) | 16.4 (15.2, 17.6) | 19.2 (18.0, 20.4) | 19.9 (18.2, 21.5) | 19.5 (19.1, 20.0)                     | 16.4 (16.0, 16.8) | 18.6 (18.2, 19.0) | 21.4 (21.0, 21.8) | 22.0 (20.8, 23.1) |
| urban                  | 17.7 (16.5, 18.9)                     | 14.7 (13.5, 15.9) | 16.8 (15.6, 18.0) | 19.4 (18.2, 20.6) | 19.9 (18.3, 21.6) | 19.6 (19.2, 20.0)                     | 16.7 (16.2, 17.1) | 18.7 (18.3, 19.1) | 21.3 (20.9, 21.8) | 21.9 (20.6, 23.0) |
| urban-rural difference | 0.3 (-0.1, 0.7)                       | 0.5 (0.1, 0.9)    | 0.3 (0.0, 0.7)    | 0.2 (-0.2, 0.6)   | 0.1 (-0.3, 0.5)   | 0.1 (-0.2, 0.3)                       | 0.3 (0.0, 0.6)    | 0.1 (-0.1, 0.4)   | 0.0 (-0.3, 0.3)   | -0.1 (-0.5, 0.2)  |
| <b>Somalia</b>         |                                       |                   |                   |                   |                   |                                       |                   |                   |                   |                   |
| rural                  | 16.5 (14.1, 18.8)                     | 14.5 (10.9, 17.9) | 15.2 (12.8, 17.6) | 17.8 (15.5, 20.1) | 19.6 (16.9, 22.3) | 18.2 (16.0, 20.4)                     | 16.2 (12.8, 19.5) | 16.9 (14.8, 19.1) | 19.5 (17.4, 21.6) | 21.4 (18.9, 24.0) |
| urban                  | 16.9 (14.5, 19.3)                     | 15.0 (11.5, 18.5) | 15.7 (13.3, 18.1) | 18.2 (15.9, 20.4) | 20.0 (17.3, 22.6) | 18.5 (16.3, 20.7)                     | 16.6 (13.2, 19.9) | 17.3 (15.1, 19.5) | 19.7 (17.6, 21.9) | 21.5 (19.1, 24.1) |
| urban-rural difference | 0.4 (-0.3, 1.1)                       | 0.6 (-0.4, 1.5)   | 0.5 (-0.3, 1.2)   | 0.4 (-0.3, 1.1)   | 0.3 (-0.5, 1.1)   | 0.3 (-0.4, 1.0)                       | 0.4 (-0.5, 1.4)   | 0.3 (-0.4, 1.0)   | 0.2 (-0.4, 0.9)   | 0.2 (-0.6, 0.9)   |
| <b>South Sudan</b>     |                                       |                   |                   |                   |                   |                                       |                   |                   |                   |                   |
| rural                  | 16.9 (14.6, 19.1)                     | 14.9 (11.4, 18.3) | 15.6 (13.3, 17.8) | 18.1 (16.0, 20.3) | 20.2 (17.7, 22.6) | 18.7 (16.5, 20.8)                     | 16.7 (13.4, 20.0) | 17.4 (15.2, 19.5) | 20.0 (17.9, 21.9) | 22.0 (19.8, 24.3) |
| urban                  | 17.3 (15.1, 19.6)                     | 15.5 (12.0, 18.9) | 16.1 (13.8, 18.3) | 18.5 (16.4, 20.7) | 20.6 (18.1, 23.0) | 19.0 (16.9, 21.0)                     | 17.1 (13.9, 20.4) | 17.7 (15.6, 19.8) | 20.2 (18.2, 22.2) | 22.2 (20.0, 24.5) |
| urban-rural difference | 0.5 (-0.3, 1.2)                       | 0.6 (-0.4, 1.5)   | 0.5 (-0.3, 1.3)   | 0.4 (-0.3, 1.1)   | 0.4 (-0.4, 1.1)   | 0.3 (-0.4, 1.0)                       | 0.4 (-0.5, 1.4)   | 0.3 (-0.4, 1.1)   | 0.3 (-0.4, 0.9)   | 0.2 (-0.5, 0.9)   |
| <b>Sudan</b>           |                                       |                   |                   |                   |                   |                                       |                   |                   |                   |                   |
| rural                  | 16.1 (14.2, 18.0)                     | 14.1 (11.0, 17.1) | 14.9 (12.9, 16.9) | 17.4 (15.7, 19.2) | 19.1 (17.3, 20.9) | 17.8 (16.4, 19.2)                     | 15.8 (12.9, 18.6) | 16.6 (15.1, 18.1) | 19.1 (17.8, 20.4) | 20.8 (19.6, 21.9) |
| urban                  | 16.6 (14.7, 18.4)                     | 14.7 (11.4, 17.7) | 15.4 (13.4, 17.3) | 17.9 (16.1, 19.7) | 19.5 (17.7, 21.3) | 18.2 (16.8, 19.6)                     | 16.2 (13.4, 19.1) | 17.0 (15.5, 18.5) | 19.5 (18.1, 20.8) | 21.0 (19.8, 22.3) |
| urban-rural difference | 0.5 (-0.2, 1.2)                       | 0.6 (-0.4, 1.6)   | 0.5 (-0.2, 1.3)   | 0.5 (-0.2, 1.2)   | 0.4 (-0.3, 1.2)   | 0.4 (-0.3, 1.0)                       | 0.4 (-0.5, 1.4)   | 0.4 (-0.3, 1.1)   | 0.3 (-0.3, 0.9)   | 0.3 (-0.4, 1.0)   |

| Boys                   | Mean BMI in 1990 (kg/m <sup>2</sup> ) |                   |                   |                   |                   | Mean BMI in 2020 (kg/m <sup>2</sup> ) |                   |                   |                   |                   |
|------------------------|---------------------------------------|-------------------|-------------------|-------------------|-------------------|---------------------------------------|-------------------|-------------------|-------------------|-------------------|
|                        | Age-standardised                      | 5 years           | 10 years          | 15 years          | 19 years          | Age-standardised                      | 5 years           | 10 years          | 15 years          | 19 years          |
| <b>Tanzania</b>        |                                       |                   |                   |                   |                   |                                       |                   |                   |                   |                   |
| rural                  | 16.6 (14.7, 18.5)                     | 15.1 (12.8, 17.3) | 15.2 (13.3, 17.1) | 17.6 (15.8, 19.5) | 20.1 (17.9, 22.2) | 18.3 (16.7, 19.9)                     | 16.8 (14.8, 18.8) | 16.9 (15.3, 18.5) | 19.4 (17.8, 20.9) | 21.8 (20.0, 23.6) |
| urban                  | 17.0 (15.1, 19.0)                     | 15.7 (13.3, 18.1) | 15.7 (13.7, 17.6) | 18.0 (16.2, 19.9) | 20.4 (18.2, 22.6) | 18.6 (16.9, 20.3)                     | 17.2 (15.0, 19.5) | 17.2 (15.5, 18.9) | 19.6 (18.0, 21.2) | 22.0 (20.1, 23.9) |
| urban-rural difference | 0.5 (-0.3, 1.2)                       | 0.6 (-0.4, 1.5)   | 0.5 (-0.3, 1.3)   | 0.4 (-0.3, 1.1)   | 0.3 (-0.5, 1.1)   | 0.3 (-0.3, 0.9)                       | 0.4 (-0.5, 1.4)   | 0.3 (-0.3, 1.0)   | 0.2 (-0.4, 0.9)   | 0.2 (-0.5, 0.9)   |
| <b>Uganda</b>          |                                       |                   |                   |                   |                   |                                       |                   |                   |                   |                   |
| rural                  | 16.3 (14.8, 17.9)                     | 14.4 (12.8, 16.1) | 14.9 (13.3, 16.5) | 17.5 (16.0, 19.1) | 19.8 (18.3, 21.4) | 18.0 (17.1, 18.8)                     | 16.2 (15.2, 17.1) | 16.6 (15.7, 17.5) | 19.2 (18.4, 20.1) | 21.5 (20.7, 22.4) |
| urban                  | 16.9 (15.3, 18.5)                     | 15.2 (13.5, 17.0) | 15.5 (13.9, 17.1) | 18.1 (16.5, 19.6) | 20.2 (18.7, 21.8) | 18.5 (17.6, 19.4)                     | 16.8 (15.6, 18.0) | 17.1 (16.2, 18.1) | 19.7 (18.8, 20.5) | 21.8 (21.0, 22.7) |
| urban-rural difference | 0.6 (0.0, 1.2)                        | 0.8 (-0.1, 1.7)   | 0.6 (0.0, 1.3)    | 0.5 (-0.1, 1.1)   | 0.4 (-0.2, 1.0)   | 0.5 (0.0, 1.0)                        | 0.7 (-0.1, 1.5)   | 0.5 (0.0, 1.1)    | 0.4 (0.0, 0.8)    | 0.3 (-0.1, 0.7)   |
| <b>Zambia</b>          |                                       |                   |                   |                   |                   |                                       |                   |                   |                   |                   |
| rural                  | 16.6 (14.7, 18.4)                     | 14.5 (11.5, 17.7) | 15.3 (13.4, 17.3) | 17.9 (16.1, 19.7) | 19.6 (17.9, 21.3) | 18.4 (17.0, 19.7)                     | 16.3 (13.4, 19.1) | 17.1 (15.6, 18.6) | 19.7 (18.4, 20.9) | 21.4 (20.4, 22.4) |
| urban                  | 17.0 (15.1, 18.9)                     | 15.1 (12.0, 18.2) | 15.8 (13.9, 17.7) | 18.3 (16.5, 20.1) | 19.9 (18.1, 21.6) | 18.6 (17.3, 19.9)                     | 16.7 (13.9, 19.5) | 17.4 (16.0, 18.9) | 19.9 (18.7, 21.1) | 21.5 (20.5, 22.5) |
| urban-rural difference | 0.4 (-0.3, 1.1)                       | 0.6 (-0.4, 1.5)   | 0.5 (-0.3, 1.2)   | 0.4 (-0.3, 1.0)   | 0.3 (-0.4, 1.1)   | 0.3 (-0.4, 0.9)                       | 0.4 (-0.5, 1.3)   | 0.3 (-0.4, 1.0)   | 0.2 (-0.4, 0.8)   | 0.1 (-0.5, 0.8)   |
| <b>Southern Africa</b> |                                       |                   |                   |                   |                   |                                       |                   |                   |                   |                   |
| <b>Botswana</b>        |                                       |                   |                   |                   |                   |                                       |                   |                   |                   |                   |
| rural                  | 16.0 (14.2, 17.8)                     | 13.8 (10.4, 17.1) | 14.8 (12.9, 16.6) | 17.3 (15.6, 19.0) | 19.1 (17.3, 21.0) | 17.6 (16.1, 19.0)                     | 15.4 (12.3, 18.5) | 16.4 (14.8, 17.9) | 18.9 (17.6, 20.3) | 20.7 (19.3, 22.1) |
| urban                  | 16.5 (14.7, 18.4)                     | 14.3 (11.0, 17.5) | 15.3 (13.4, 17.2) | 17.9 (16.2, 19.6) | 19.8 (17.9, 21.6) | 17.7 (16.3, 19.1)                     | 15.5 (12.4, 18.5) | 16.5 (15.0, 18.0) | 19.1 (17.8, 20.4) | 20.9 (19.5, 22.3) |
| urban-rural difference | 0.6 (-0.2, 1.4)                       | 0.5 (-0.5, 1.6)   | 0.6 (-0.2, 1.4)   | 0.6 (-0.2, 1.4)   | 0.6 (-0.2, 1.5)   | 0.1 (-0.6, 0.8)                       | 0.1 (-0.9, 1.0)   | 0.1 (-0.6, 0.9)   | 0.2 (-0.5, 0.8)   | 0.2 (-0.6, 1.0)   |
| <b>Lesotho</b>         |                                       |                   |                   |                   |                   |                                       |                   |                   |                   |                   |
| rural                  | 16.0 (14.2, 17.8)                     | 13.7 (10.6, 17.0) | 14.8 (13.0, 16.6) | 17.4 (15.8, 19.0) | 19.1 (17.5, 20.7) | 17.7 (16.4, 19.0)                     | 15.5 (12.5, 18.4) | 16.5 (15.1, 17.8) | 19.1 (18.0, 20.1) | 20.8 (19.6, 21.9) |
| urban                  | 16.4 (14.7, 18.3)                     | 14.2 (11.0, 17.5) | 15.2 (13.4, 17.1) | 17.8 (16.2, 19.4) | 19.5 (17.9, 21.2) | 17.7 (16.3, 19.0)                     | 15.5 (12.5, 18.4) | 16.5 (15.1, 17.8) | 19.1 (18.0, 20.2) | 20.8 (19.6, 21.9) |
| urban-rural difference | 0.5 (-0.2, 1.2)                       | 0.5 (-0.5, 1.5)   | 0.5 (-0.3, 1.3)   | 0.5 (-0.2, 1.2)   | 0.5 (-0.3, 1.2)   | 0.0 (-0.6, 0.6)                       | 0.0 (-0.9, 1.0)   | 0.0 (-0.7, 0.7)   | 0.0 (-0.5, 0.5)   | 0.0 (-0.6, 0.5)   |
| <b>Namibia</b>         |                                       |                   |                   |                   |                   |                                       |                   |                   |                   |                   |
| rural                  | 16.5 (14.5, 18.5)                     | 14.4 (11.0, 17.8) | 15.3 (13.3, 17.4) | 17.8 (15.8, 19.7) | 19.5 (17.4, 21.5) | 18.2 (16.2, 20.1)                     | 16.0 (12.7, 19.3) | 17.0 (15.0, 18.9) | 19.5 (17.7, 21.3) | 21.1 (19.2, 23.0) |
| urban                  | 17.1 (15.1, 19.1)                     | 14.9 (11.5, 18.3) | 15.9 (13.9, 18.0) | 18.4 (16.5, 20.3) | 20.1 (18.0, 22.1) | 18.3 (16.5, 20.2)                     | 16.2 (12.8, 19.4) | 17.2 (15.3, 19.0) | 19.6 (17.9, 21.3) | 21.3 (19.5, 23.1) |
| urban-rural difference | 0.6 (-0.2, 1.4)                       | 0.6 (-0.5, 1.6)   | 0.6 (-0.2, 1.4)   | 0.6 (-0.1, 1.4)   | 0.6 (-0.2, 1.5)   | 0.2 (-0.5, 0.9)                       | 0.1 (-0.8, 1.1)   | 0.1 (-0.6, 0.9)   | 0.2 (-0.5, 0.8)   | 0.2 (-0.6, 0.9)   |
| <b>South Africa</b>    |                                       |                   |                   |                   |                   |                                       |                   |                   |                   |                   |
| rural                  | 16.1 (14.9, 17.4)                     | 14.1 (12.8, 15.3) | 15.0 (13.8, 16.3) | 17.4 (16.2, 18.7) | 18.9 (17.7, 20.2) | 18.3 (17.6, 18.9)                     | 16.2 (15.6, 16.9) | 17.2 (16.5, 17.8) | 19.6 (18.9, 20.2) | 21.1 (20.4, 21.8) |
| urban                  | 16.9 (15.6, 18.2)                     | 14.3 (13.1, 15.7) | 15.6 (14.3, 16.9) | 18.4 (17.1, 19.7) | 20.2 (18.8, 21.5) | 18.4 (17.8, 19.0)                     | 15.9 (15.2, 16.5) | 17.2 (16.5, 17.8) | 19.9 (19.3, 20.5) | 21.7 (21.0, 22.4) |
| urban-rural difference | 0.7 (0.2, 1.3)                        | 0.3 (-0.3, 0.9)   | 0.6 (0.1, 1.2)    | 0.9 (0.4, 1.5)    | 1.2 (0.7, 1.8)    | 0.1 (-0.2, 0.5)                       | -0.3 (-0.7, 0.1)  | 0.0 (-0.4, 0.3)   | 0.3 (0.0, 0.7)    | 0.6 (0.2, 1.0)    |
| <b>Eswatini</b>        |                                       |                   |                   |                   |                   |                                       |                   |                   |                   |                   |
| rural                  | 16.8 (15.0, 18.5)                     | 14.6 (11.4, 17.8) | 15.5 (13.7, 17.2) | 18.1 (16.5, 19.7) | 20.2 (18.6, 21.8) | 18.5 (17.2, 19.9)                     | 16.4 (13.3, 19.5) | 17.2 (15.8, 18.6) | 19.8 (18.7, 20.9) | 21.9 (20.8, 23.1) |
| urban                  | 17.4 (15.7, 19.2)                     | 15.2 (12.0, 18.4) | 16.1 (14.3, 17.9) | 18.8 (17.2, 20.4) | 20.9 (19.3, 22.5) | 18.7 (17.3, 20.1)                     | 16.5 (13.5, 19.6) | 17.4 (15.9, 18.9) | 20.1 (18.9, 21.2) | 22.2 (21.0, 23.4) |
| urban-rural difference | 0.6 (-0.1, 1.4)                       | 0.6 (-0.4, 1.6)   | 0.6 (-0.1, 1.4)   | 0.7 (0.0, 1.4)    | 0.7 (0.0, 1.5)    | 0.2 (-0.4, 0.9)                       | 0.1 (-0.8, 1.1)   | 0.2 (-0.5, 0.9)   | 0.3 (-0.3, 0.8)   | 0.3 (-0.3, 0.9)   |
| <b>Zimbabwe</b>        |                                       |                   |                   |                   |                   |                                       |                   |                   |                   |                   |
| rural                  | 16.8 (15.3, 18.3)                     | 14.6 (11.5, 17.6) | 15.5 (14.0, 17.1) | 18.1 (16.8, 19.4) | 20.2 (19.0, 21.5) | 17.7 (16.4, 18.9)                     | 15.5 (12.4, 18.5) | 16.4 (15.1, 17.7) | 19.0 (18.0, 20.0) | 21.1 (20.1, 22.1) |
| urban                  | 17.4 (15.9, 19.0)                     | 15.3 (12.1, 18.4) | 16.2 (14.7, 17.8) | 18.7 (17.4, 20.1) | 20.8 (19.5, 22.1) | 17.9 (16.7, 19.2)                     | 15.8 (12.7, 18.8) | 16.7 (15.4, 18.0) | 19.2 (18.2, 20.3) | 21.3 (20.3, 22.3) |
| urban-rural difference | 0.6 (-0.1, 1.4)                       | 0.7 (-0.3, 1.7)   | 0.7 (-0.1, 1.5)   | 0.6 (-0.1, 1.4)   | 0.6 (-0.2, 1.4)   | 0.3 (-0.3, 0.8)                       | 0.3 (-0.6, 1.2)   | 0.3 (-0.4, 0.9)   | 0.2 (-0.2, 0.7)   | 0.2 (-0.3, 0.7)   |
| <b>West Africa</b>     |                                       |                   |                   |                   |                   |                                       |                   |                   |                   |                   |
| <b>Benin</b>           |                                       |                   |                   |                   |                   |                                       |                   |                   |                   |                   |
| rural                  | 16.7 (14.9, 18.6)                     | 14.7 (11.6, 17.8) | 15.5 (13.5, 17.4) | 17.9 (16.1, 19.7) | 20.3 (18.5, 22.2) | 18.5 (17.1, 19.9)                     | 16.5 (13.5, 19.4) | 17.3 (15.7, 18.8) | 19.8 (18.5, 21.1) | 22.1 (20.9, 23.4) |
| urban                  | 17.2 (15.4, 19.2)                     | 15.3 (12.1, 18.4) | 16.0 (14.0, 18.0) | 18.4 (16.6, 20.2) | 20.7 (18.8, 22.6) | 18.8 (17.3, 20.2)                     | 16.8 (13.8, 19.7) | 17.5 (16.0, 19.1) | 19.9 (18.6, 21.3) | 22.2 (20.9, 23.5) |
| urban-rural difference | 0.5 (-0.3, 1.3)                       | 0.6 (-0.4, 1.7)   | 0.5 (-0.3, 1.4)   | 0.5 (-0.3, 1.3)   | 0.4 (-0.4, 1.3)   | 0.2 (-0.5, 0.9)                       | 0.3 (-0.6, 1.3)   | 0.2 (-0.5, 1.0)   | 0.2 (-0.5, 0.8)   | 0.1 (-0.6, 0.8)   |
| <b>Burkina Faso</b>    |                                       |                   |                   |                   |                   |                                       |                   |                   |                   |                   |
| rural                  | 16.2 (14.4, 18.0)                     | 14.5 (12.7, 16.4) | 14.8 (13.0, 16.6) | 17.2 (15.5, 19.1) | 20.1 (18.2, 22.0) | 18.0 (16.3, 19.6)                     | 16.3 (14.5, 17.9) | 16.6 (14.9, 18.2) | 19.0 (17.3, 20.7) | 21.9 (20.1, 23.7) |
| urban                  | 16.7 (14.9, 18.6)                     | 15.2 (13.2, 17.2) | 15.4 (13.5, 17.2) | 17.7 (15.9, 19.6) | 20.5 (18.5, 22.5) | 18.2 (16.4, 19.9)                     | 16.6 (14.7, 18.5) | 16.8 (15.1, 18.6) | 19.2 (17.4, 20.9) | 22.0 (20.1, 23.9) |
| urban-rural difference | 0.5 (-0.2, 1.3)                       | 0.7 (-0.3, 1.7)   | 0.6 (-0.2, 1.4)   | 0.5 (-0.3, 1.3)   | 0.4 (-0.4, 1.2)   | 0.2 (-0.5, 0.9)                       | 0.4 (-0.6, 1.3)   | 0.3 (-0.5, 1.0)   | 0.2 (-0.5, 0.8)   | 0.1 (-0.7, 0.8)   |
| <b>Cabo Verde</b>      |                                       |                   |                   |                   |                   |                                       |                   |                   |                   |                   |
| rural                  | 16.3 (14.4, 18.2)                     | 14.2 (11.0, 17.3) | 15.1 (13.1, 17.0) | 17.5 (15.8, 19.3) | 19.6 (17.8, 21.5) | 18.0 (16.8, 19.3)                     | 16.0 (13.1, 18.7) | 16.8 (15.4, 18.3) | 19.3 (18.1, 20.4) | 21.4 (20.4, 22.4) |
| urban                  | 16.9 (15.0, 18.8)                     | 14.9 (11.7, 17.9) | 15.7 (13.7, 17.6) | 18.1 (16.3, 19.8) | 20.2 (18.4, 22.0) | 18.4 (17.1, 19.6)                     | 16.3 (13.5, 19.1) | 17.2 (15.7, 18.6) | 19.6 (18.4, 20.8) | 21.6 (20.7, 22.6) |
| urban-rural difference | 0.6 (-0.2, 1.4)                       | 0.6 (-0.4, 1.7)   | 0.6 (-0.2, 1.5)   | 0.6 (-0.2, 1.4)   | 0.5 (-0.3, 1.4)   | 0.3 (-0.3, 1.0)                       | 0.4 (-0.6, 1.3)   | 0.3 (-0.4, 1.1)   | 0.3 (-0.3, 0.9)   | 0.3 (-0.4, 0.9)   |
| <b>Cameroon</b>        |                                       |                   |                   |                   |                   |                                       |                   |                   |                   |                   |

| Boys                         | Mean BMI in 1990 (kg/m <sup>2</sup> ) |                   |                   |                   |                   | Mean BMI in 2020 (kg/m <sup>2</sup> ) |                   |                   |                   |                   |
|------------------------------|---------------------------------------|-------------------|-------------------|-------------------|-------------------|---------------------------------------|-------------------|-------------------|-------------------|-------------------|
|                              | Age-standardised                      | 5 years           | 10 years          | 15 years          | 19 years          | Age-standardised                      | 5 years           | 10 years          | 15 years          | 19 years          |
| rural                        | 17.0 (15.2, 18.7)                     | 14.9 (11.8, 18.0) | 15.6 (13.7, 17.4) | 18.1 (16.5, 19.7) | 20.9 (19.2, 22.5) | 18.7 (17.1, 20.3)                     | 16.7 (13.6, 19.8) | 17.4 (15.7, 19.0) | 19.9 (18.4, 21.4) | 22.7 (21.1, 24.1) |
| urban                        | 17.5 (15.8, 19.2)                     | 15.6 (12.4, 18.7) | 16.2 (14.4, 18.0) | 18.6 (17.0, 20.2) | 21.3 (19.7, 23.0) | 18.9 (17.3, 20.6)                     | 17.0 (14.0, 20.1) | 17.6 (15.9, 19.3) | 20.1 (18.6, 21.5) | 22.7 (21.3, 24.2) |
| urban-rural difference       | 0.6 (-0.2, 1.3)                       | 0.7 (-0.3, 1.7)   | 0.6 (-0.2, 1.4)   | 0.5 (-0.2, 1.2)   | 0.4 (-0.3, 1.2)   | 0.2 (-0.5, 0.9)                       | 0.3 (-0.6, 1.3)   | 0.2 (-0.5, 1.0)   | 0.2 (-0.5, 0.8)   | 0.1 (-0.6, 0.8)   |
| <b>Chad</b>                  |                                       |                   |                   |                   |                   |                                       |                   |                   |                   |                   |
| rural                        | 16.3 (13.9, 18.7)                     | 14.2 (10.7, 17.7) | 15.1 (12.7, 17.5) | 17.6 (15.3, 19.8) | 19.8 (17.1, 22.4) | 18.1 (15.8, 20.3)                     | 16.0 (12.5, 19.4) | 16.9 (14.6, 19.1) | 19.3 (17.2, 21.4) | 21.5 (19.0, 24.0) |
| urban                        | 16.8 (14.4, 19.2)                     | 14.8 (11.3, 18.3) | 15.6 (13.2, 18.0) | 18.0 (15.7, 20.2) | 20.2 (17.4, 22.8) | 18.3 (16.0, 20.5)                     | 16.3 (12.8, 19.7) | 17.1 (14.8, 19.3) | 19.5 (17.3, 21.6) | 21.6 (19.1, 24.1) |
| urban-rural difference       | 0.5 (-0.3, 1.3)                       | 0.6 (-0.4, 1.7)   | 0.5 (-0.3, 1.3)   | 0.4 (-0.3, 1.2)   | 0.4 (-0.5, 1.2)   | 0.2 (-0.5, 0.9)                       | 0.3 (-0.7, 1.3)   | 0.2 (-0.5, 1.0)   | 0.1 (-0.5, 0.8)   | 0.1 (-0.7, 0.8)   |
| <b>Côte d'Ivoire</b>         |                                       |                   |                   |                   |                   |                                       |                   |                   |                   |                   |
| rural                        | 16.7 (14.8, 18.7)                     | 14.6 (11.4, 18.0) | 15.5 (13.4, 17.5) | 17.9 (16.1, 19.8) | 20.4 (18.5, 22.3) | 18.5 (16.7, 20.3)                     | 16.4 (13.2, 19.6) | 17.2 (15.4, 19.1) | 19.7 (18.0, 21.4) | 22.2 (20.5, 23.9) |
| urban                        | 17.2 (15.3, 19.2)                     | 15.3 (12.0, 18.6) | 16.0 (14.0, 18.0) | 18.3 (16.5, 20.2) | 20.7 (18.8, 22.6) | 18.7 (16.9, 20.4)                     | 16.7 (13.5, 19.9) | 17.4 (15.6, 19.2) | 19.8 (18.1, 21.4) | 22.2 (20.4, 23.9) |
| urban-rural difference       | 0.5 (-0.2, 1.3)                       | 0.6 (-0.4, 1.7)   | 0.5 (-0.3, 1.3)   | 0.4 (-0.3, 1.1)   | 0.3 (-0.5, 1.1)   | 0.2 (-0.5, 0.8)                       | 0.3 (-0.6, 1.3)   | 0.2 (-0.5, 0.9)   | 0.1 (-0.5, 0.7)   | 0.0 (-0.7, 0.7)   |
| <b>Gambia</b>                |                                       |                   |                   |                   |                   |                                       |                   |                   |                   |                   |
| rural                        | 16.4 (14.0, 18.8)                     | 14.3 (10.7, 17.8) | 15.1 (12.7, 17.5) | 17.6 (15.3, 19.9) | 19.8 (17.1, 22.5) | 18.1 (15.9, 20.4)                     | 16.0 (12.6, 19.4) | 16.9 (14.6, 19.2) | 19.3 (17.2, 21.5) | 21.5 (19.0, 24.2) |
| urban                        | 16.9 (14.4, 19.3)                     | 14.9 (11.3, 18.4) | 15.6 (13.2, 18.1) | 18.0 (15.7, 20.3) | 20.2 (17.5, 23.0) | 18.3 (16.1, 20.5)                     | 16.3 (12.8, 19.7) | 17.1 (14.9, 19.4) | 19.5 (17.3, 21.6) | 21.6 (19.1, 24.1) |
| urban-rural difference       | 0.5 (-0.3, 1.3)                       | 0.6 (-0.4, 1.7)   | 0.5 (-0.3, 1.4)   | 0.4 (-0.3, 1.2)   | 0.4 (-0.4, 1.2)   | 0.2 (-0.5, 0.9)                       | 0.3 (-0.7, 1.3)   | 0.2 (-0.5, 1.0)   | 0.1 (-0.6, 0.8)   | 0.1 (-0.7, 0.8)   |
| <b>Ghana</b>                 |                                       |                   |                   |                   |                   |                                       |                   |                   |                   |                   |
| rural                        | 16.4 (14.7, 18.0)                     | 14.3 (12.6, 16.0) | 15.2 (13.6, 16.8) | 17.7 (16.0, 19.2) | 19.4 (17.7, 20.9) | 18.4 (17.7, 19.1)                     | 16.3 (15.5, 17.2) | 17.3 (16.6, 18.0) | 19.7 (19.0, 20.4) | 21.4 (20.7, 22.1) |
| urban                        | 16.9 (15.2, 18.5)                     | 15.0 (13.3, 16.6) | 15.8 (14.1, 17.4) | 18.0 (16.4, 19.7) | 19.6 (18.0, 21.2) | 18.5 (17.9, 19.2)                     | 16.7 (15.9, 17.5) | 17.5 (16.7, 18.2) | 19.7 (19.0, 20.4) | 21.3 (20.6, 22.0) |
| urban-rural difference       | 0.5 (-0.2, 1.3)                       | 0.7 (-0.1, 1.6)   | 0.5 (-0.2, 1.3)   | 0.4 (-0.3, 1.2)   | 0.3 (-0.5, 1.1)   | 0.1 (-0.3, 0.5)                       | 0.3 (-0.2, 0.9)   | 0.2 (-0.2, 0.6)   | 0.0 (-0.4, 0.4)   | -0.1 (-0.5, 0.3)  |
| <b>Guinea</b>                |                                       |                   |                   |                   |                   |                                       |                   |                   |                   |                   |
| rural                        | 16.1 (14.2, 18.1)                     | 14.3 (10.8, 17.8) | 15.1 (12.9, 17.5) | 17.6 (15.4, 19.8) | 19.8 (17.3, 22.4) | 17.9 (16.1, 19.6)                     | 16.0 (12.6, 19.5) | 16.9 (14.7, 19.1) | 19.4 (17.3, 21.5) | 21.6 (19.0, 24.1) |
| urban                        | 16.7 (14.7, 18.6)                     | 14.9 (11.4, 18.5) | 15.7 (13.4, 18.0) | 18.1 (15.9, 20.3) | 20.2 (17.6, 22.8) | 18.1 (16.3, 19.9)                     | 16.3 (13.0, 19.7) | 17.1 (15.0, 19.3) | 19.5 (17.4, 21.6) | 21.7 (19.1, 24.2) |
| urban-rural difference       | 0.5 (-0.3, 1.3)                       | 0.6 (-0.4, 1.7)   | 0.5 (-0.3, 1.4)   | 0.5 (-0.3, 1.2)   | 0.4 (-0.5, 1.2)   | 0.2 (-0.5, 0.9)                       | 0.3 (-0.6, 1.3)   | 0.2 (-0.5, 1.0)   | 0.1 (-0.5, 0.8)   | 0.1 (-0.7, 0.8)   |
| <b>Guinea Bissau</b>         |                                       |                   |                   |                   |                   |                                       |                   |                   |                   |                   |
| rural                        | 16.4 (14.1, 18.8)                     | 14.1 (10.8, 17.3) | 14.8 (12.8, 16.8) | 17.3 (15.5, 19.2) | 20.1 (18.2, 22.2) | 18.1 (16.0, 20.4)                     | 15.8 (12.7, 18.9) | 16.5 (14.7, 18.3) | 19.0 (17.4, 20.6) | 21.8 (20.1, 23.7) |
| urban                        | 16.9 (14.6, 19.2)                     | 14.7 (11.5, 18.0) | 15.3 (13.3, 17.3) | 17.8 (15.9, 19.7) | 20.5 (18.5, 22.5) | 18.3 (16.1, 20.5)                     | 16.1 (13.1, 19.2) | 16.7 (14.9, 18.5) | 19.2 (17.5, 20.8) | 21.9 (20.1, 23.7) |
| urban-rural difference       | 0.5 (-0.3, 1.3)                       | 0.6 (-0.4, 1.7)   | 0.5 (-0.3, 1.4)   | 0.4 (-0.3, 1.2)   | 0.4 (-0.5, 1.2)   | 0.2 (-0.5, 0.9)                       | 0.3 (-0.6, 1.3)   | 0.2 (-0.5, 1.0)   | 0.1 (-0.5, 0.8)   | 0.1 (-0.7, 0.8)   |
| <b>Liberia</b>               |                                       |                   |                   |                   |                   |                                       |                   |                   |                   |                   |
| rural                        | 16.2 (14.4, 18.0)                     | 14.1 (11.0, 17.2) | 14.9 (13.1, 16.7) | 17.4 (15.7, 19.1) | 19.9 (18.1, 21.6) | 17.9 (16.6, 19.2)                     | 15.8 (13.0, 18.8) | 16.6 (15.3, 18.0) | 19.1 (18.0, 20.2) | 21.6 (20.4, 22.7) |
| urban                        | 16.6 (14.9, 18.5)                     | 14.7 (11.6, 17.8) | 15.4 (13.6, 17.2) | 17.7 (16.1, 19.4) | 20.1 (18.4, 21.8) | 18.0 (16.7, 19.3)                     | 16.1 (13.2, 19.0) | 16.8 (15.4, 18.2) | 19.1 (18.0, 20.3) | 21.5 (20.3, 22.7) |
| urban-rural difference       | 0.4 (-0.3, 1.2)                       | 0.6 (-0.4, 1.6)   | 0.5 (-0.3, 1.3)   | 0.4 (-0.3, 1.1)   | 0.3 (-0.5, 1.1)   | 0.1 (-0.5, 0.7)                       | 0.3 (-0.7, 1.2)   | 0.1 (-0.5, 0.8)   | 0.0 (-0.5, 0.6)   | -0.1 (-0.7, 0.5)  |
| <b>Mali</b>                  |                                       |                   |                   |                   |                   |                                       |                   |                   |                   |                   |
| rural                        | 16.5 (14.8, 18.2)                     | 14.4 (11.2, 17.5) | 15.4 (13.6, 17.1) | 17.8 (16.3, 19.3) | 19.5 (17.9, 21.1) | 18.4 (16.9, 20.0)                     | 16.2 (13.2, 19.2) | 17.3 (15.7, 18.9) | 19.7 (18.3, 21.2) | 21.4 (20.0, 22.9) |
| urban                        | 16.9 (15.1, 18.6)                     | 14.9 (11.7, 18.0) | 15.8 (14.0, 17.6) | 18.1 (16.5, 19.7) | 19.7 (18.0, 21.5) | 18.4 (16.9, 19.9)                     | 16.4 (13.3, 19.4) | 17.3 (15.8, 18.9) | 19.6 (18.3, 21.1) | 21.2 (19.8, 22.7) |
| urban-rural difference       | 0.4 (-0.4, 1.2)                       | 0.5 (-0.5, 1.6)   | 0.4 (-0.4, 1.3)   | 0.3 (-0.5, 1.1)   | 0.2 (-0.6, 1.0)   | 0.0 (-0.7, 0.7)                       | 0.2 (-0.8, 1.1)   | 0.1 (-0.7, 0.8)   | -0.1 (-0.7, 0.6)  | -0.2 (-0.9, 0.5)  |
| <b>Mauritania</b>            |                                       |                   |                   |                   |                   |                                       |                   |                   |                   |                   |
| rural                        | 16.6 (14.5, 18.6)                     | 14.6 (11.3, 17.8) | 15.3 (13.2, 17.3) | 17.7 (15.8, 19.6) | 20.4 (18.2, 22.5) | 18.3 (16.6, 20.2)                     | 16.3 (13.2, 19.4) | 17.0 (15.2, 19.0) | 19.5 (17.8, 21.2) | 22.1 (20.2, 24.2) |
| urban                        | 17.1 (15.0, 19.0)                     | 15.2 (11.9, 18.4) | 15.8 (13.7, 17.8) | 18.2 (16.3, 20.0) | 20.8 (18.7, 22.9) | 18.5 (16.8, 20.4)                     | 16.6 (13.6, 19.8) | 17.3 (15.4, 19.1) | 19.6 (17.9, 21.3) | 22.2 (20.3, 24.2) |
| urban-rural difference       | 0.5 (-0.3, 1.3)                       | 0.6 (-0.4, 1.7)   | 0.5 (-0.3, 1.4)   | 0.5 (-0.3, 1.3)   | 0.4 (-0.4, 1.3)   | 0.2 (-0.5, 0.9)                       | 0.3 (-0.6, 1.3)   | 0.2 (-0.5, 1.0)   | 0.1 (-0.5, 0.8)   | 0.1 (-0.7, 0.8)   |
| <b>Niger</b>                 |                                       |                   |                   |                   |                   |                                       |                   |                   |                   |                   |
| rural                        | 15.7 (13.9, 17.6)                     | 13.6 (10.3, 16.8) | 14.6 (12.7, 16.5) | 17.1 (15.3, 18.8) | 18.6 (16.8, 20.4) | 17.5 (15.8, 19.1)                     | 15.3 (12.2, 18.4) | 16.3 (14.7, 18.0) | 18.8 (17.3, 20.3) | 20.3 (18.7, 22.0) |
| urban                        | 16.3 (14.4, 18.2)                     | 14.2 (10.8, 17.5) | 15.2 (13.2, 17.1) | 17.5 (15.8, 19.3) | 19.0 (17.1, 20.9) | 17.7 (16.0, 19.4)                     | 15.6 (12.4, 18.7) | 16.6 (14.8, 18.3) | 19.0 (17.4, 20.5) | 20.4 (18.8, 22.1) |
| urban-rural difference       | 0.5 (-0.3, 1.3)                       | 0.6 (-0.4, 1.7)   | 0.5 (-0.3, 1.4)   | 0.5 (-0.3, 1.3)   | 0.4 (-0.5, 1.3)   | 0.2 (-0.5, 0.9)                       | 0.3 (-0.7, 1.3)   | 0.2 (-0.5, 1.0)   | 0.2 (-0.5, 0.8)   | 0.1 (-0.6, 0.8)   |
| <b>Nigeria</b>               |                                       |                   |                   |                   |                   |                                       |                   |                   |                   |                   |
| rural                        | 15.8 (14.2, 17.3)                     | 13.8 (12.2, 15.4) | 14.6 (13.0, 16.2) | 16.9 (15.3, 18.5) | 19.0 (17.4, 20.7) | 17.5 (16.5, 18.4)                     | 15.5 (14.5, 16.5) | 16.3 (15.4, 17.2) | 18.6 (17.7, 19.6) | 20.8 (19.8, 21.7) |
| urban                        | 16.2 (14.6, 17.8)                     | 14.4 (12.8, 16.2) | 15.1 (13.4, 16.7) | 17.2 (15.6, 18.9) | 19.3 (17.6, 21.0) | 17.6 (16.6, 18.5)                     | 15.8 (14.7, 16.9) | 16.4 (15.4, 17.5) | 18.6 (17.6, 19.6) | 20.6 (19.6, 21.7) |
| urban-rural difference       | 0.4 (-0.3, 1.2)                       | 0.6 (-0.2, 1.6)   | 0.5 (-0.3, 1.3)   | 0.3 (-0.4, 1.1)   | 0.2 (-0.6, 1.0)   | 0.1 (-0.5, 0.7)                       | 0.3 (-0.5, 1.1)   | 0.2 (-0.5, 0.8)   | 0.0 (-0.6, 0.6)   | -0.1 (-0.8, 0.5)  |
| <b>Sao Tome and Principe</b> |                                       |                   |                   |                   |                   |                                       |                   |                   |                   |                   |
| rural                        | 17.0 (15.2, 18.8)                     | 14.9 (11.7, 18.0) | 15.7 (13.9, 17.5) | 18.3 (16.6, 19.9) | 20.4 (18.8, 22.1) | 18.6 (17.4, 19.7)                     | 16.4 (13.6, 19.3) | 17.3 (16.0, 18.6) | 19.8 (18.8, 20.8) | 22.0 (21.1, 22.9) |
| urban                        | 17.5 (15.8, 19.3)                     | 15.5 (12.4, 18.7) | 16.3 (14.5, 18.1) | 18.7 (17.1, 20.3) | 20.9 (19.2, 22.5) | 18.8 (17.6, 20.0)                     | 16.8 (14.0, 19.7) | 17.5 (16.3, 18.8) | 20.0 (19.0, 21.0) | 22.1 (21.2, 23.1) |
| urban-rural difference       | 0.5 (-0.2, 1.3)                       | 0.7 (-0.3, 1.7)   | 0.6 (-0.2, 1.4)   | 0.5 (-0.2, 1.2)   | 0.4 (-0.4, 1.2)   | 0.2 (-0.4, 0.8)                       | 0.4 (-0.6, 1.3)   | 0.3 (-0.4, 0.9)   | 0.2 (-0.4, 0.7)   | 0.1 (-0.5, 0.7)   |

| Boys                   | Mean BMI in 1990 (kg/m <sup>2</sup> ) |                   |                   |                   |                   | Mean BMI in 2020 (kg/m <sup>2</sup> ) |                   |                   |                   |                   |
|------------------------|---------------------------------------|-------------------|-------------------|-------------------|-------------------|---------------------------------------|-------------------|-------------------|-------------------|-------------------|
|                        | Age-standardised                      | 5 years           | 10 years          | 15 years          | 19 years          | Age-standardised                      | 5 years           | 10 years          | 15 years          | 19 years          |
| Senegal                |                                       |                   |                   |                   |                   |                                       |                   |                   |                   |                   |
| rural                  | 15.2 (13.5, 17.0)                     | 13.1 (10.1, 16.2) | 14.0 (12.2, 15.8) | 16.4 (14.8, 18.1) | 18.6 (16.9, 20.4) | 16.9 (15.4, 18.3)                     | 14.8 (11.9, 17.7) | 15.6 (14.2, 17.1) | 18.1 (16.8, 19.3) | 20.3 (19.0, 21.6) |
| urban                  | 15.7 (13.9, 17.5)                     | 13.7 (10.7, 16.8) | 14.5 (12.7, 16.4) | 16.8 (15.2, 18.5) | 19.0 (17.3, 20.7) | 17.0 (15.6, 18.5)                     | 15.1 (12.2, 17.9) | 15.8 (14.3, 17.3) | 18.2 (16.9, 19.5) | 20.3 (19.0, 21.7) |
| urban-rural difference | 0.5 (-0.2, 1.2)                       | 0.6 (-0.4, 1.6)   | 0.5 (-0.2, 1.3)   | 0.4 (-0.2, 1.2)   | 0.4 (-0.4, 1.1)   | 0.2 (-0.4, 0.8)                       | 0.3 (-0.6, 1.2)   | 0.2 (-0.5, 0.9)   | 0.1 (-0.4, 0.7)   | 0.1 (-0.5, 0.6)   |
| Sierra Leone           |                                       |                   |                   |                   |                   |                                       |                   |                   |                   |                   |
| rural                  | 16.5 (14.7, 18.3)                     | 14.3 (11.2, 17.4) | 15.4 (13.6, 17.2) | 17.8 (16.1, 19.4) | 19.4 (17.8, 21.1) | 18.3 (17.3, 19.2)                     | 16.1 (13.3, 18.8) | 17.1 (16.1, 18.2) | 19.5 (18.9, 20.2) | 21.2 (20.5, 21.9) |
| urban                  | 17.0 (15.3, 18.8)                     | 15.0 (11.9, 18.1) | 16.0 (14.2, 17.8) | 18.3 (16.7, 19.9) | 19.9 (18.2, 21.5) | 18.5 (17.6, 19.5)                     | 16.5 (13.7, 19.2) | 17.4 (16.4, 18.5) | 19.8 (19.1, 20.4) | 21.4 (20.6, 22.1) |
| urban-rural difference | 0.6 (-0.2, 1.3)                       | 0.7 (-0.3, 1.7)   | 0.6 (-0.2, 1.4)   | 0.5 (-0.2, 1.3)   | 0.4 (-0.3, 1.3)   | 0.3 (-0.3, 0.8)                       | 0.4 (-0.5, 1.3)   | 0.3 (-0.3, 0.9)   | 0.2 (-0.2, 0.7)   | 0.2 (-0.3, 0.7)   |
| Togo                   |                                       |                   |                   |                   |                   |                                       |                   |                   |                   |                   |
| rural                  | 16.7 (14.9, 18.5)                     | 14.6 (11.4, 17.7) | 15.5 (13.7, 17.4) | 18.0 (16.3, 19.6) | 19.9 (18.1, 21.7) | 18.5 (17.0, 19.9)                     | 16.3 (13.5, 19.3) | 17.3 (15.8, 18.8) | 19.7 (18.4, 21.1) | 21.6 (20.2, 23.1) |
| urban                  | 17.2 (15.5, 19.0)                     | 15.2 (12.0, 18.4) | 16.1 (14.3, 17.9) | 18.4 (16.8, 20.1) | 20.2 (18.5, 22.0) | 18.7 (17.2, 20.2)                     | 16.7 (13.8, 19.7) | 17.5 (16.0, 19.1) | 19.9 (18.5, 21.2) | 21.7 (20.2, 23.2) |
| urban-rural difference | 0.5 (-0.3, 1.3)                       | 0.6 (-0.4, 1.7)   | 0.5 (-0.3, 1.4)   | 0.4 (-0.3, 1.2)   | 0.4 (-0.5, 1.2)   | 0.2 (-0.5, 0.9)                       | 0.3 (-0.7, 1.3)   | 0.2 (-0.5, 1.0)   | 0.1 (-0.5, 0.8)   | 0.1 (-0.7, 0.8)   |

**Supplementary Figure 1.** Number of height data sources, by region, year and sex.

(A) For each sex, the size of each circle shows the number of data sources for each region and year, and the colours indicate the relative count of national, subnational and community data sources. (B) For each sex, the size of each circle shows the number of data sources for each region and year, and the colours indicate whether the data sources covered rural areas, urban areas or both.

**A** Girls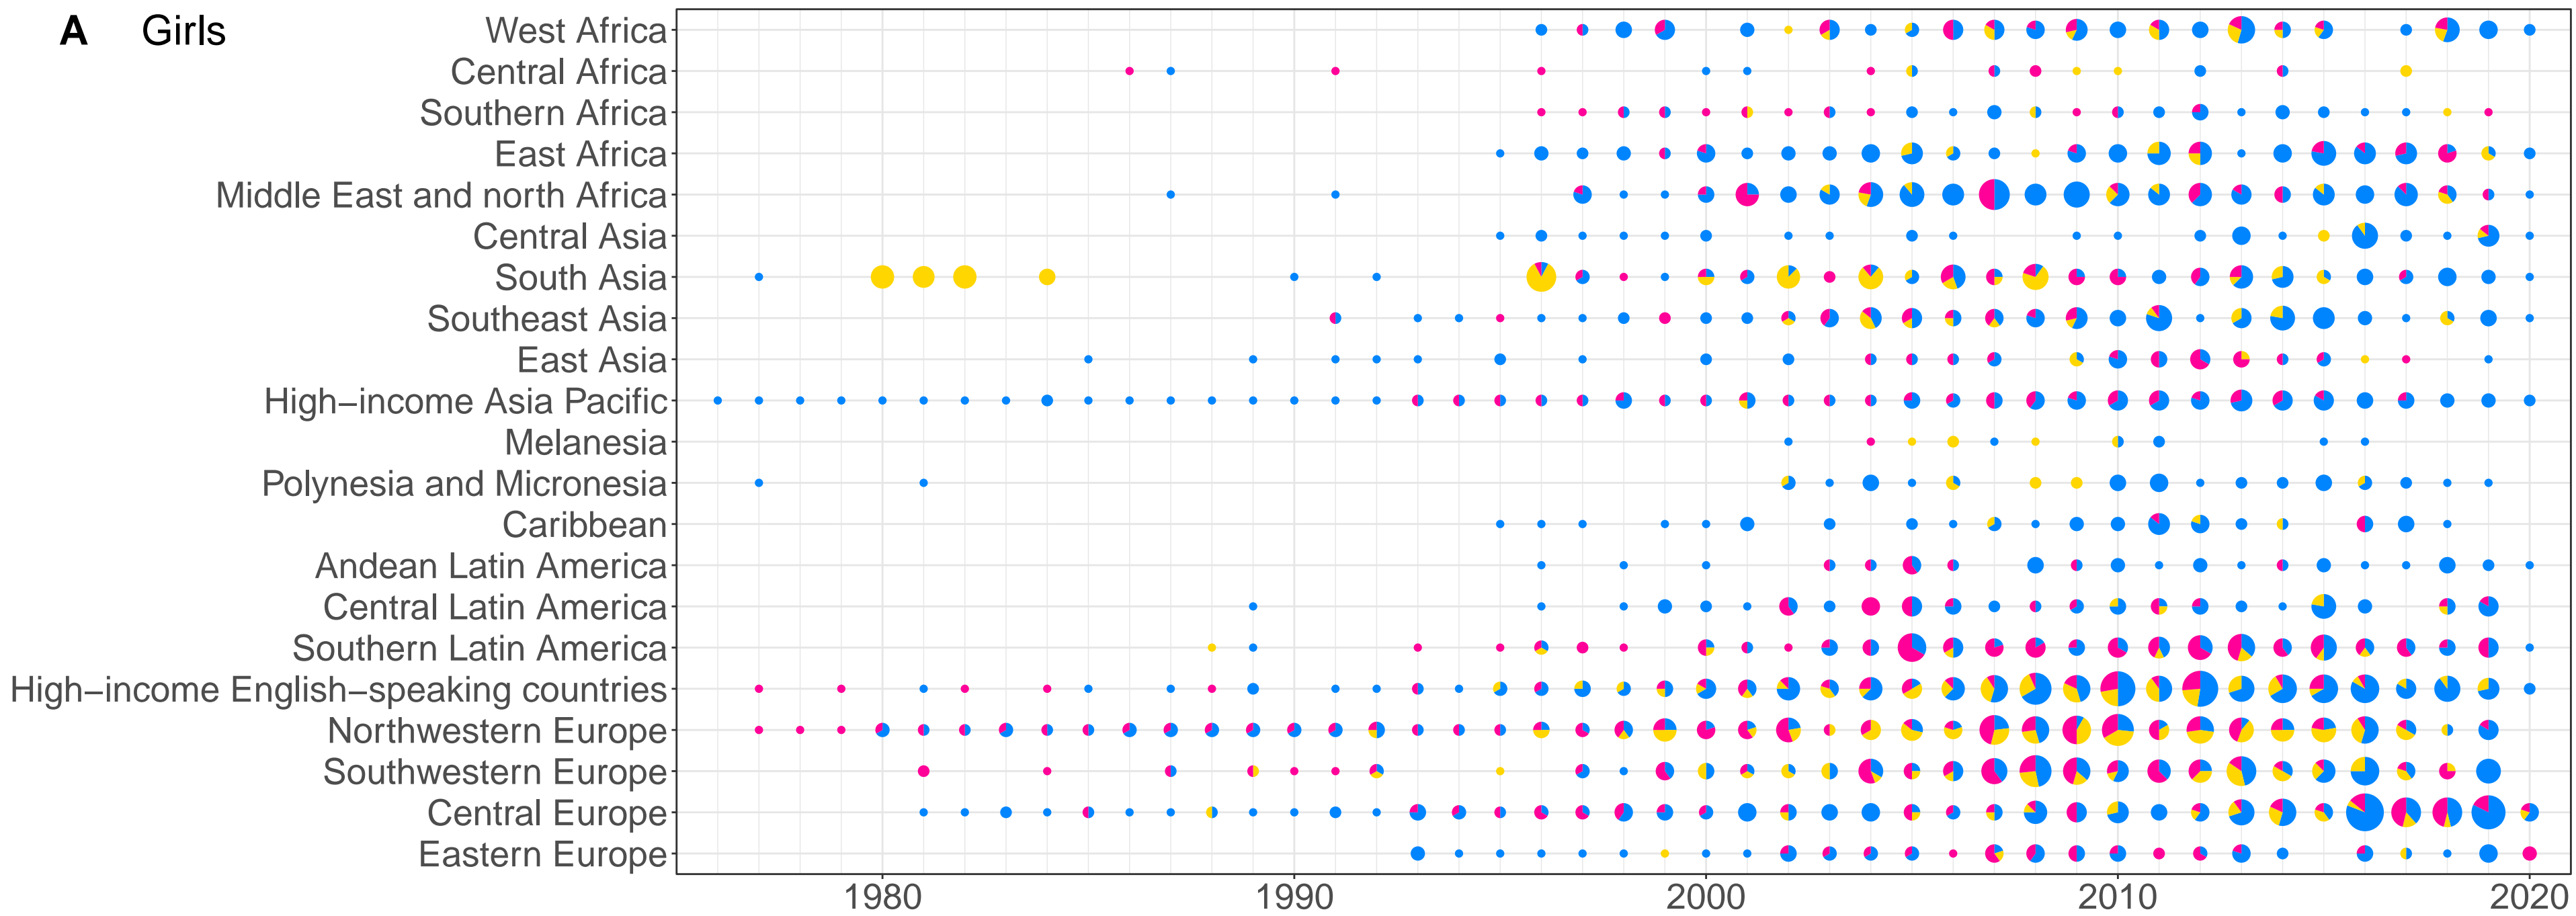

Boys

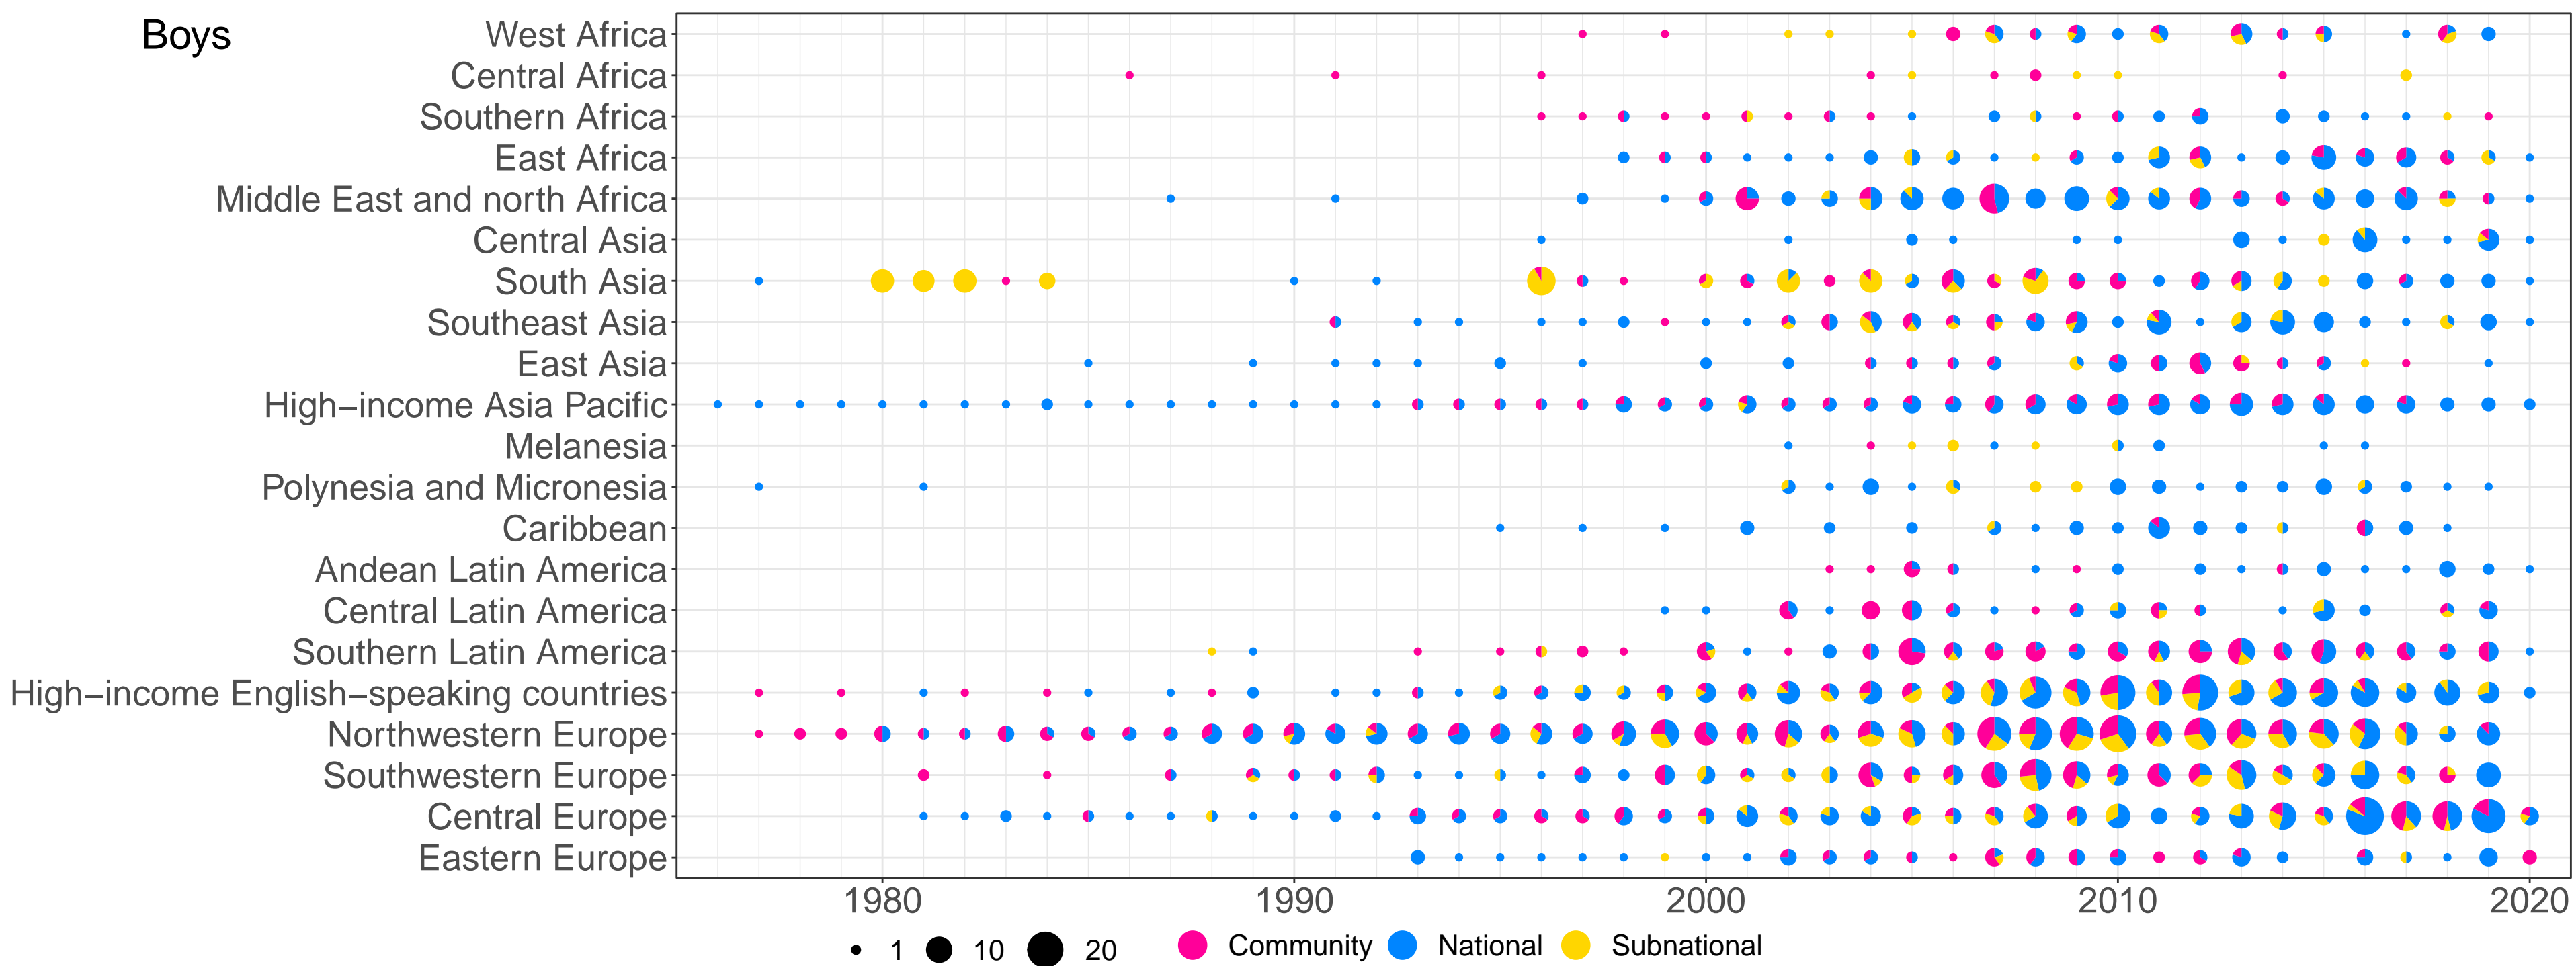



**B****Girls**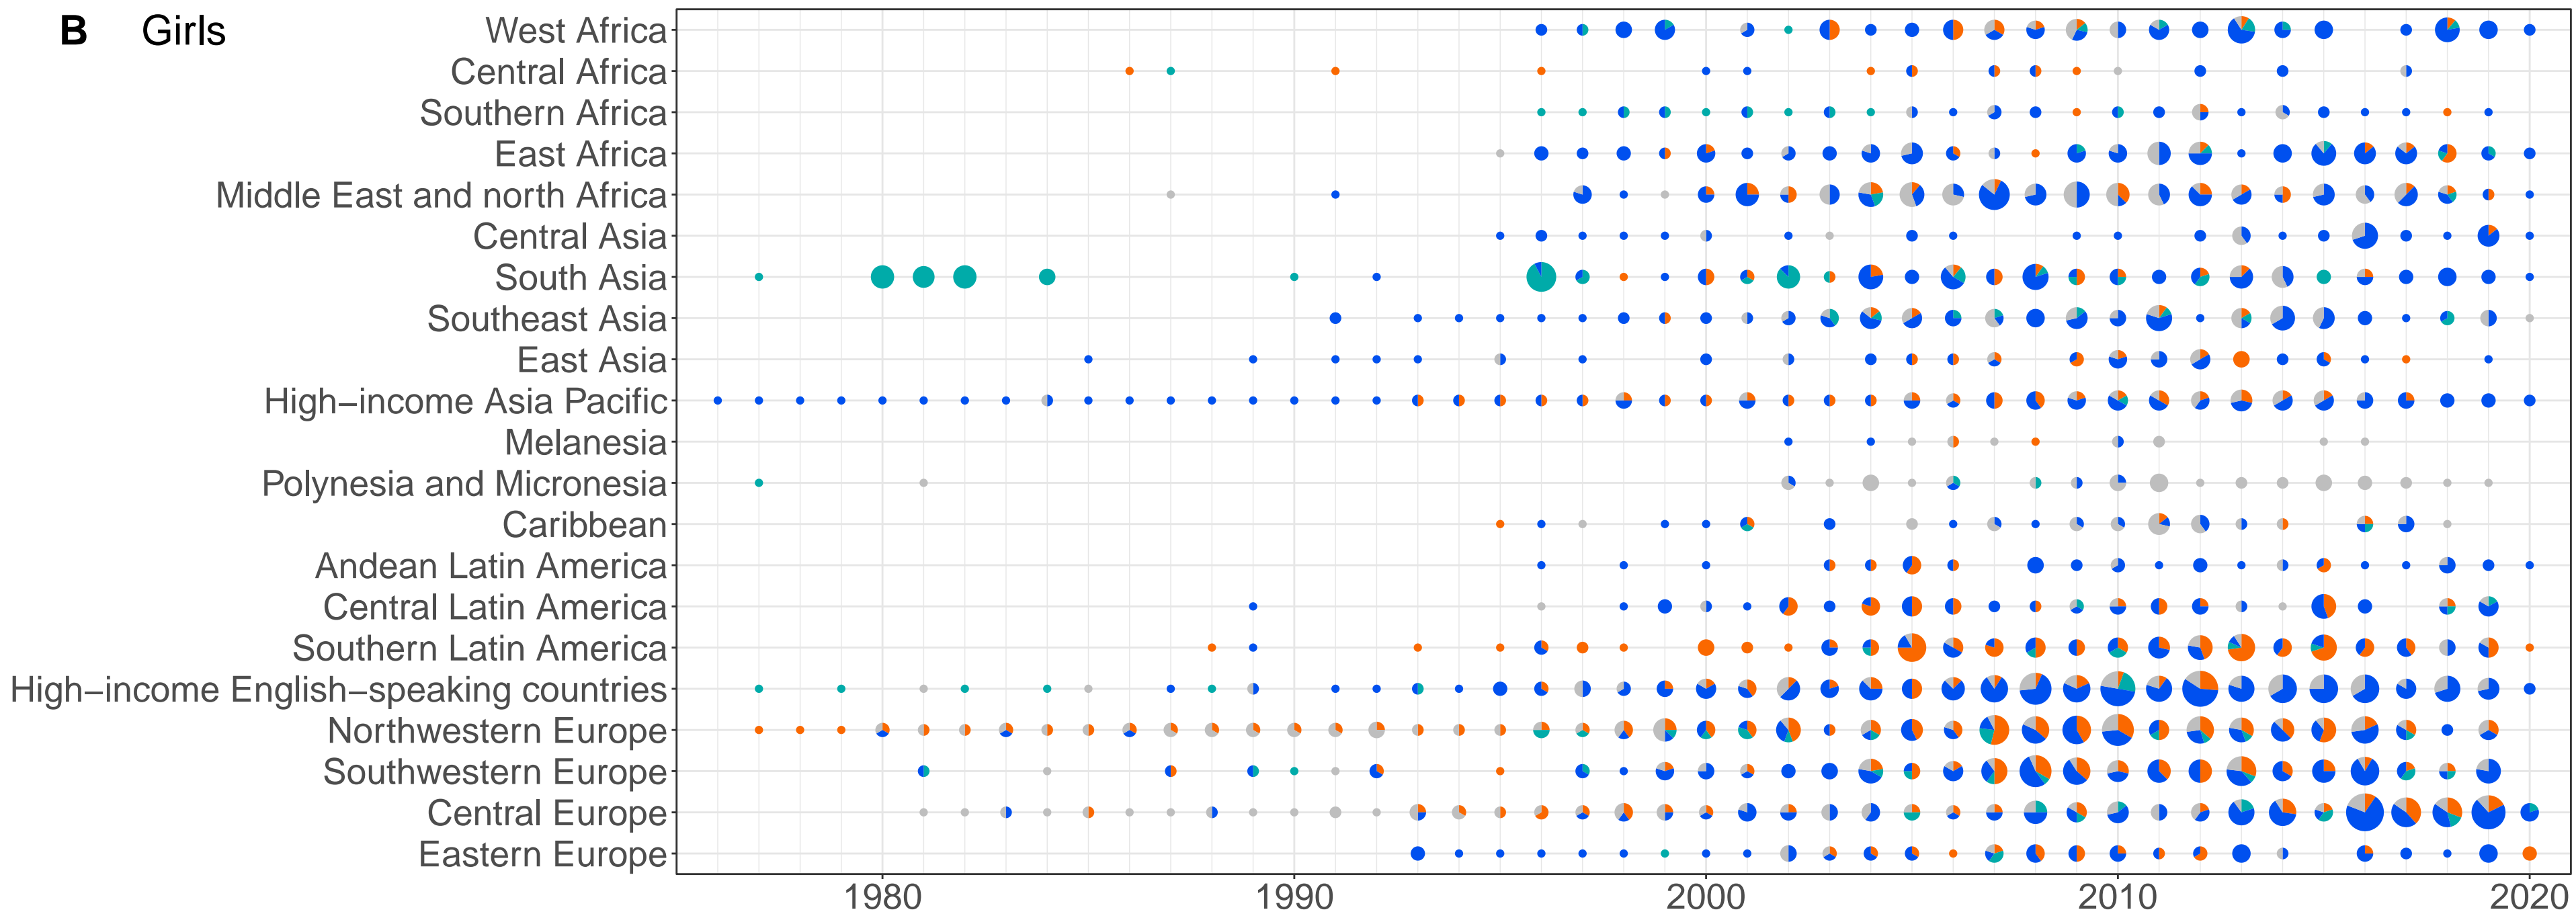**Boys**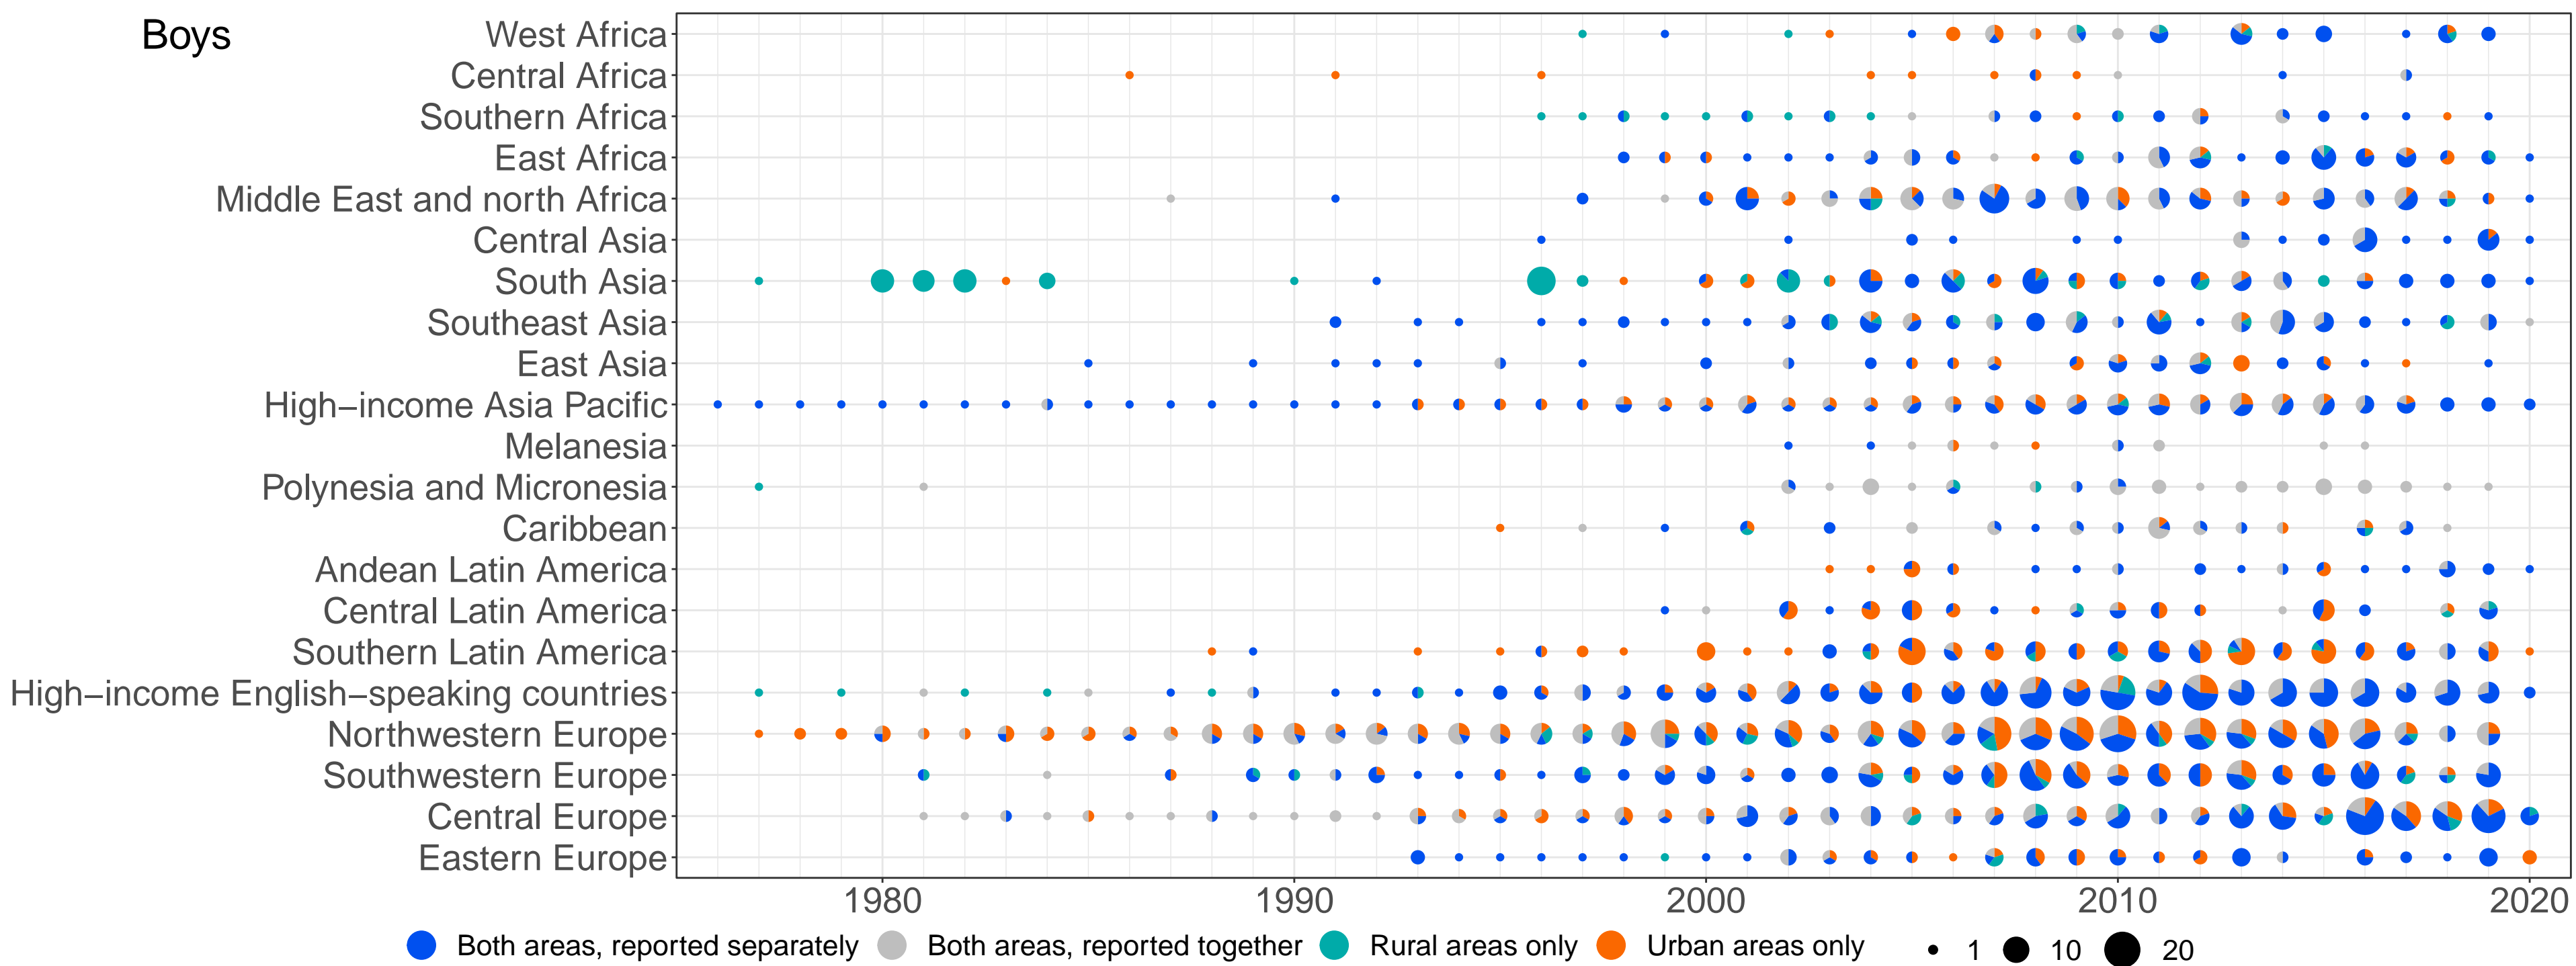

**Supplementary Figure 2.** Number of body-mass index (BMI) data sources, by region, year and sex.

(A) For each sex, the size of each circle shows the number of data sources for each region and year, and the colours indicate the relative count of national, subnational and community data sources. (B) For each sex, the size of each circle shows the number of data sources for each region and year, and the colours indicate whether the data sources covered rural areas, urban areas or both.

# A Girls

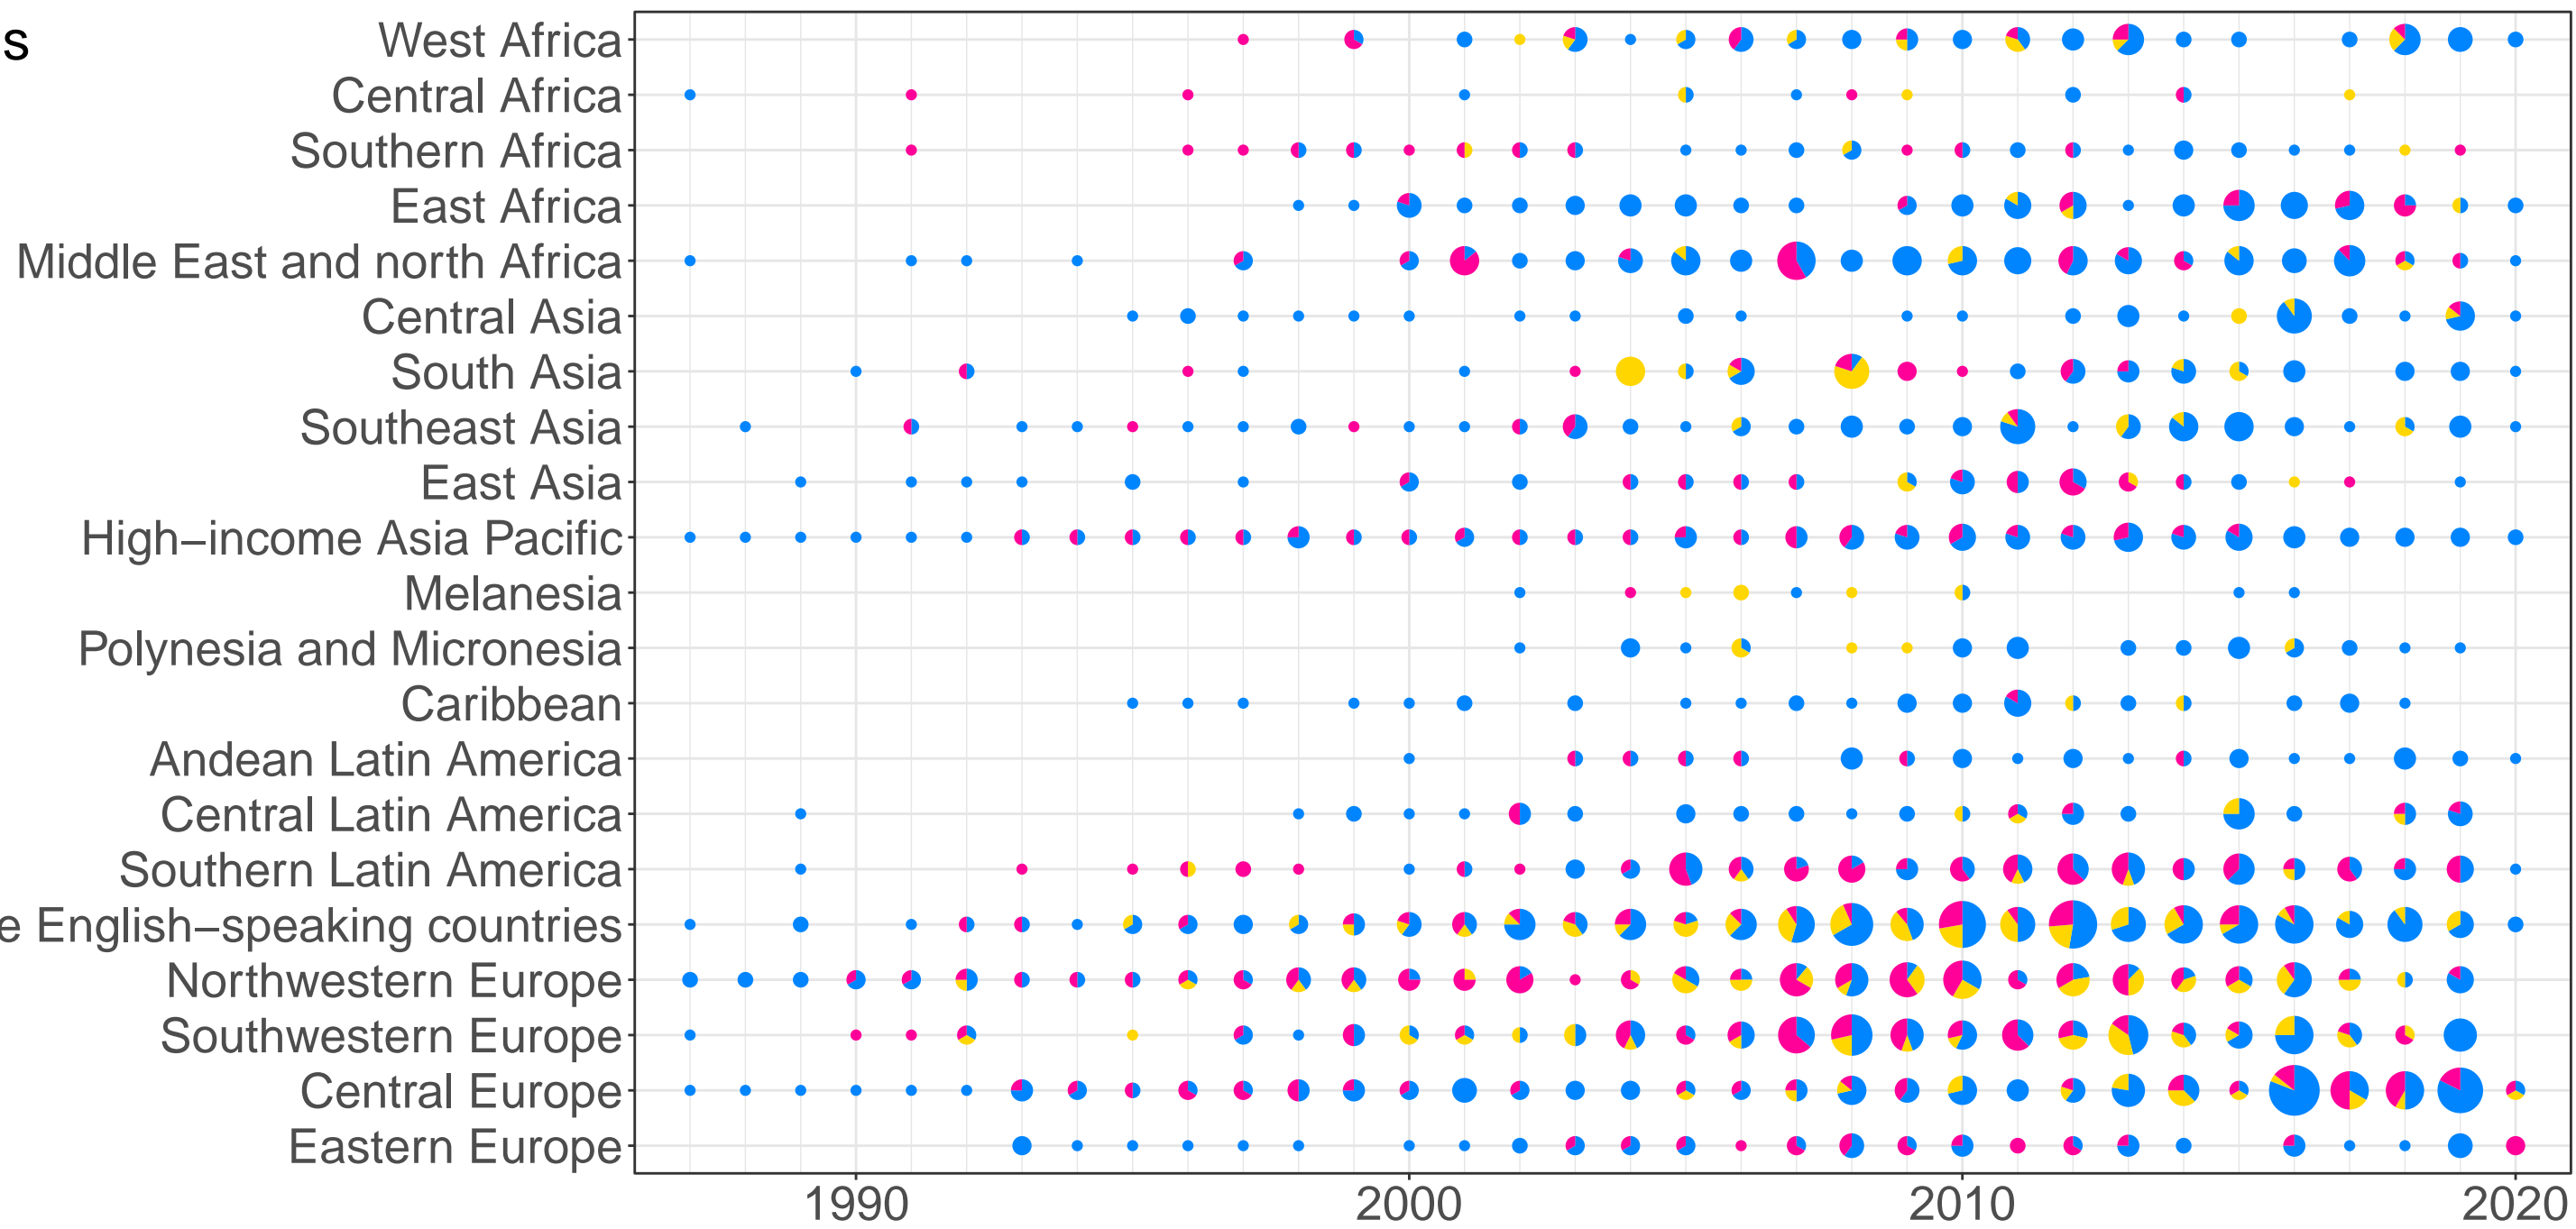

# Boys

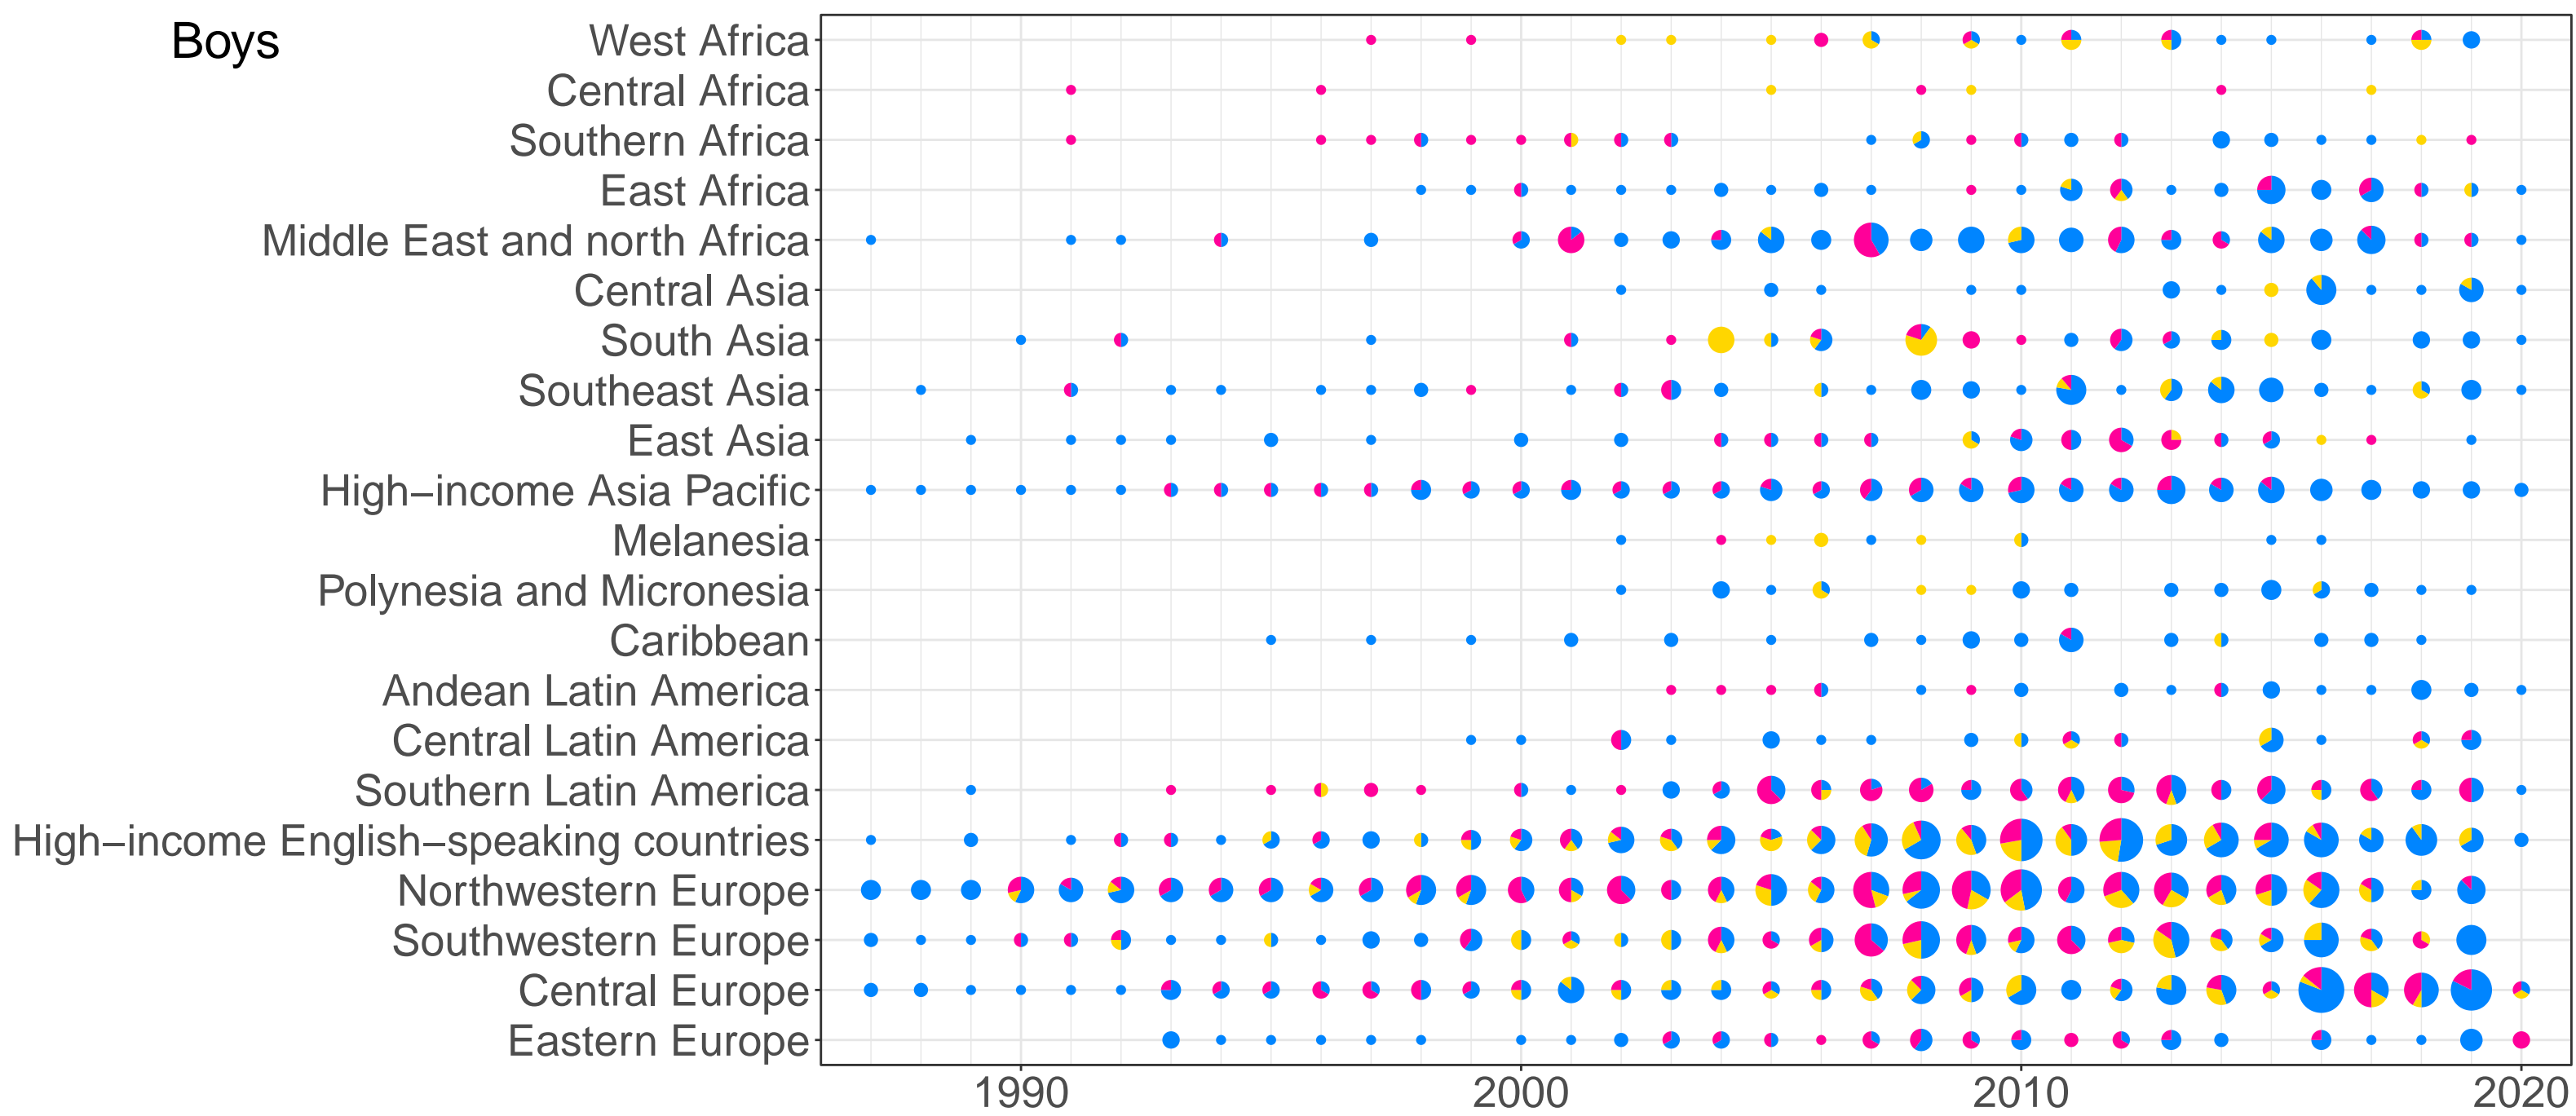

• 1 ● 10 ● 20 ● Community ● National ● Subnational

**B** Girls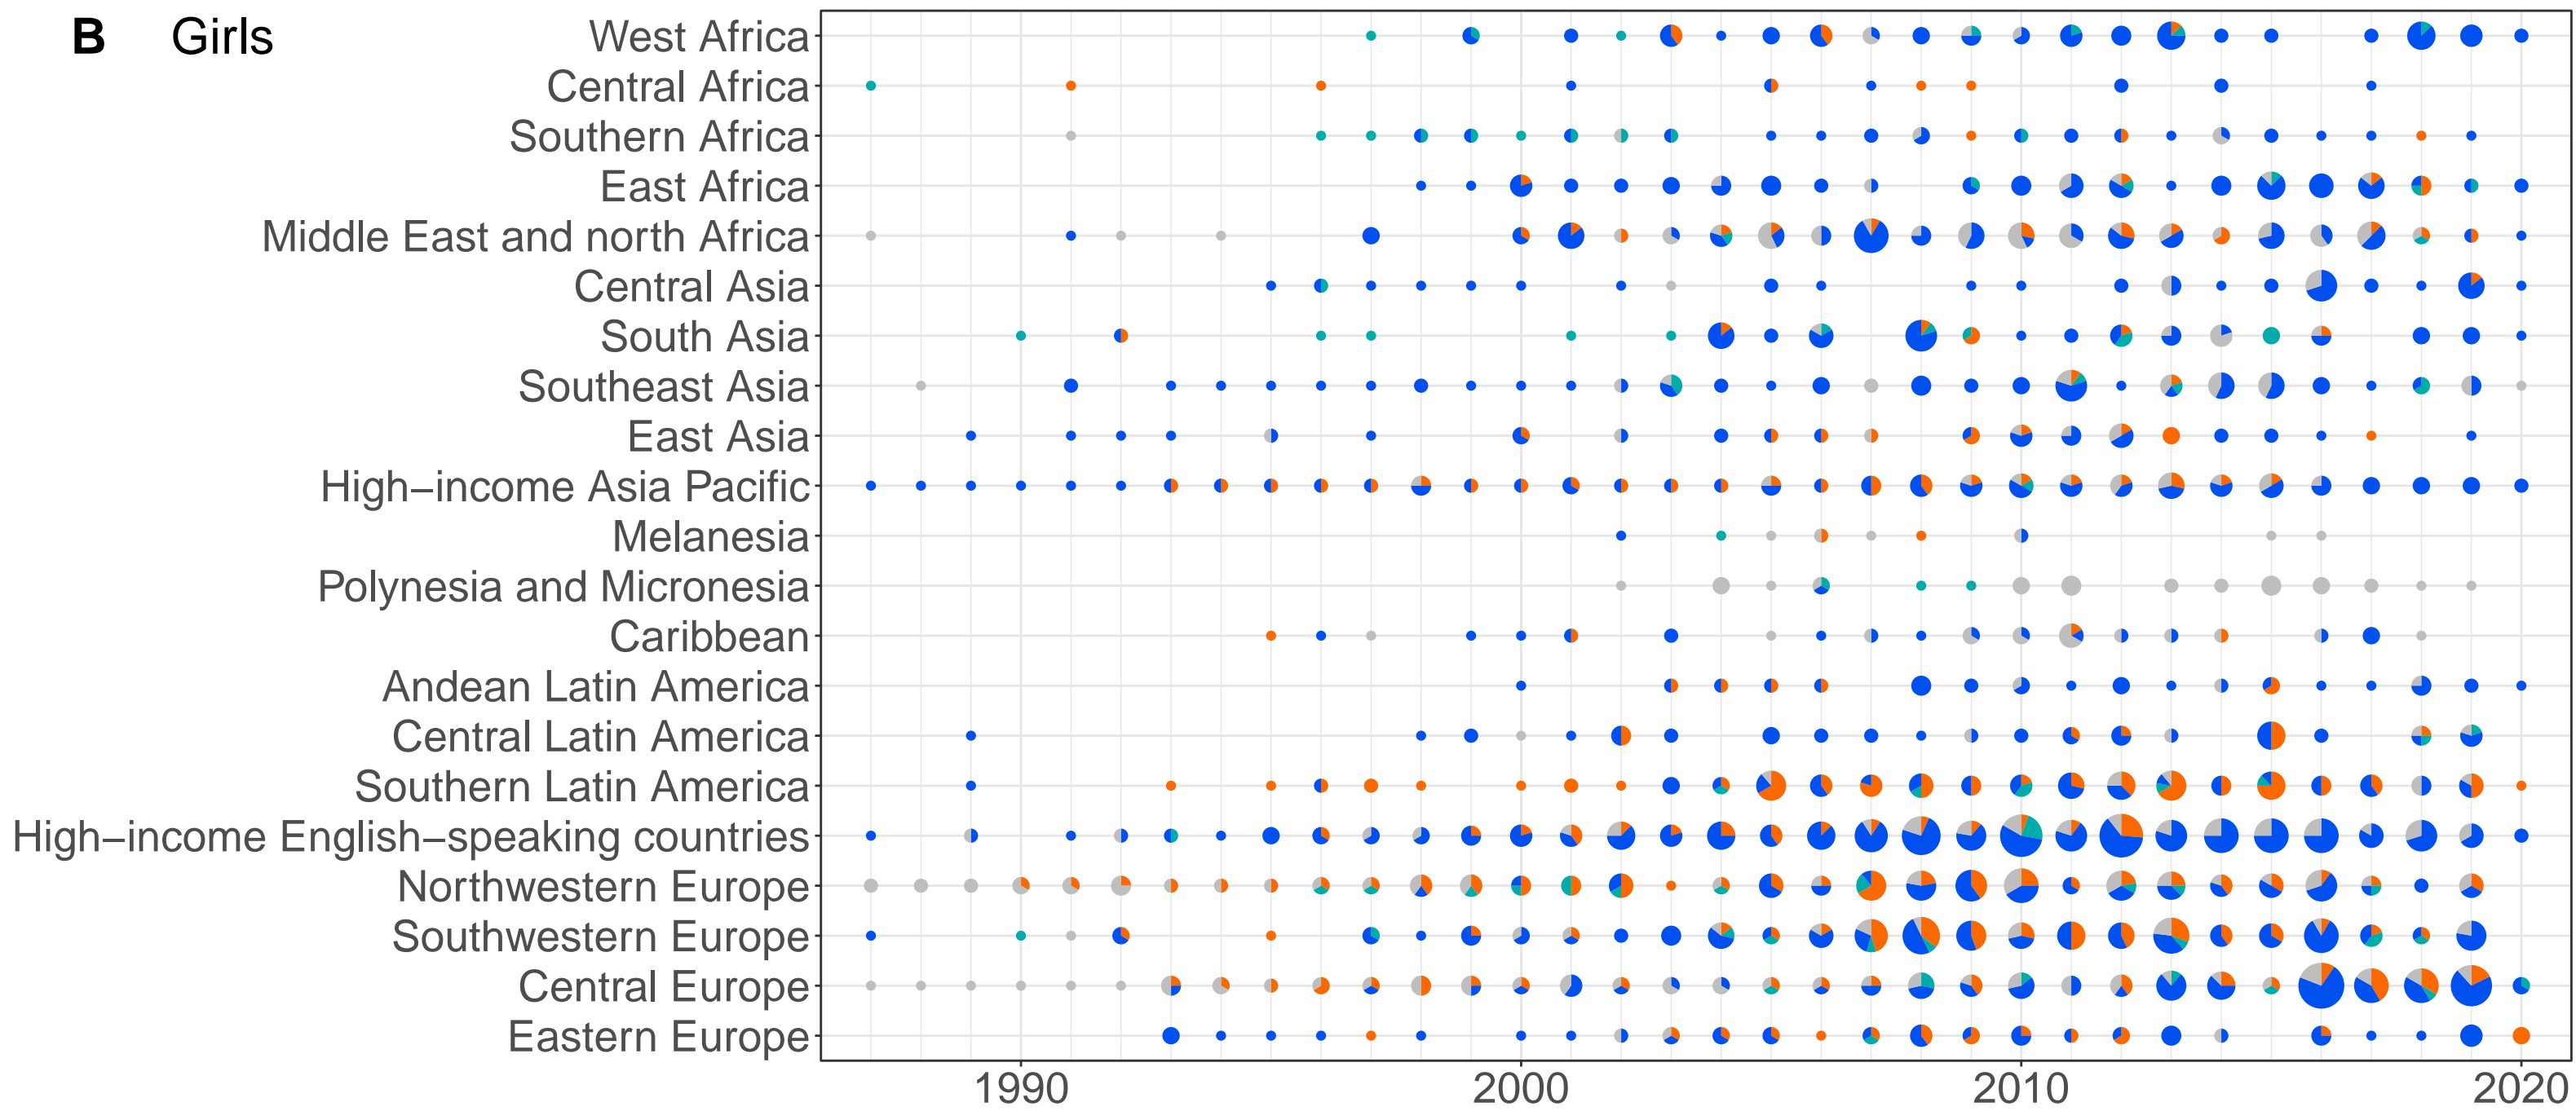

## Boys

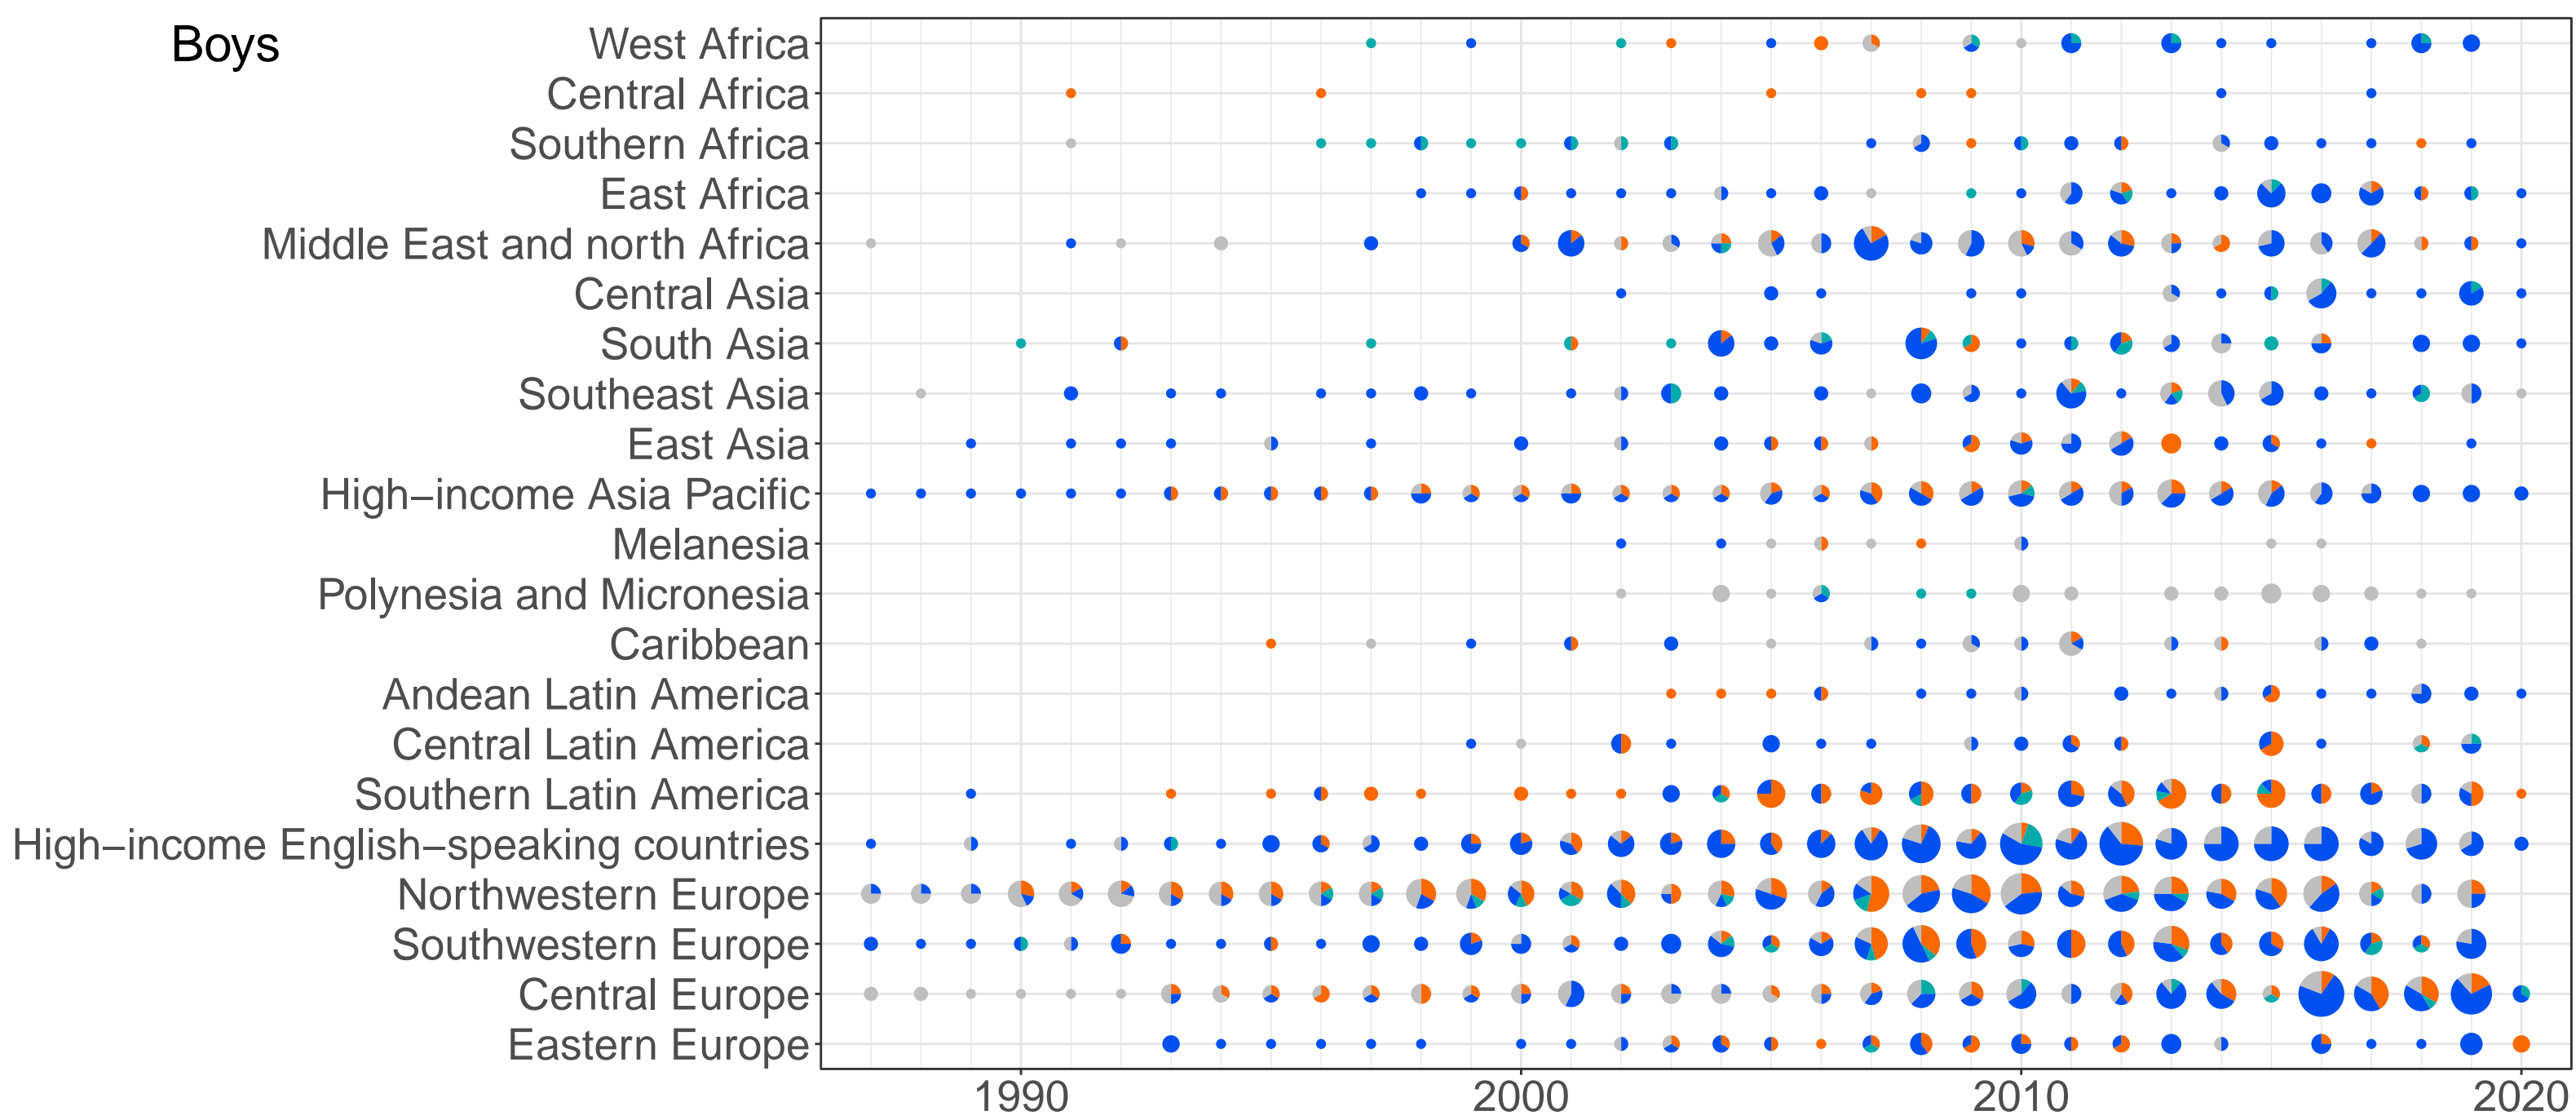

● Both areas, reported separately  
 ● Both areas, reported together  
 ● Rural areas only  
 ● Urban areas only  
 • 1  
 ● 10  
 ● 20

**Supplementary Figure 3.** Comparison of urban-rural difference in height and body-mass index (BMI) in 2020, by sex.

We did not estimate the difference between rural and urban BMI or height for areas classified as entirely urban (Bermuda, Kuwait, Nauru and Singapore) or entirely rural (Tokelau).

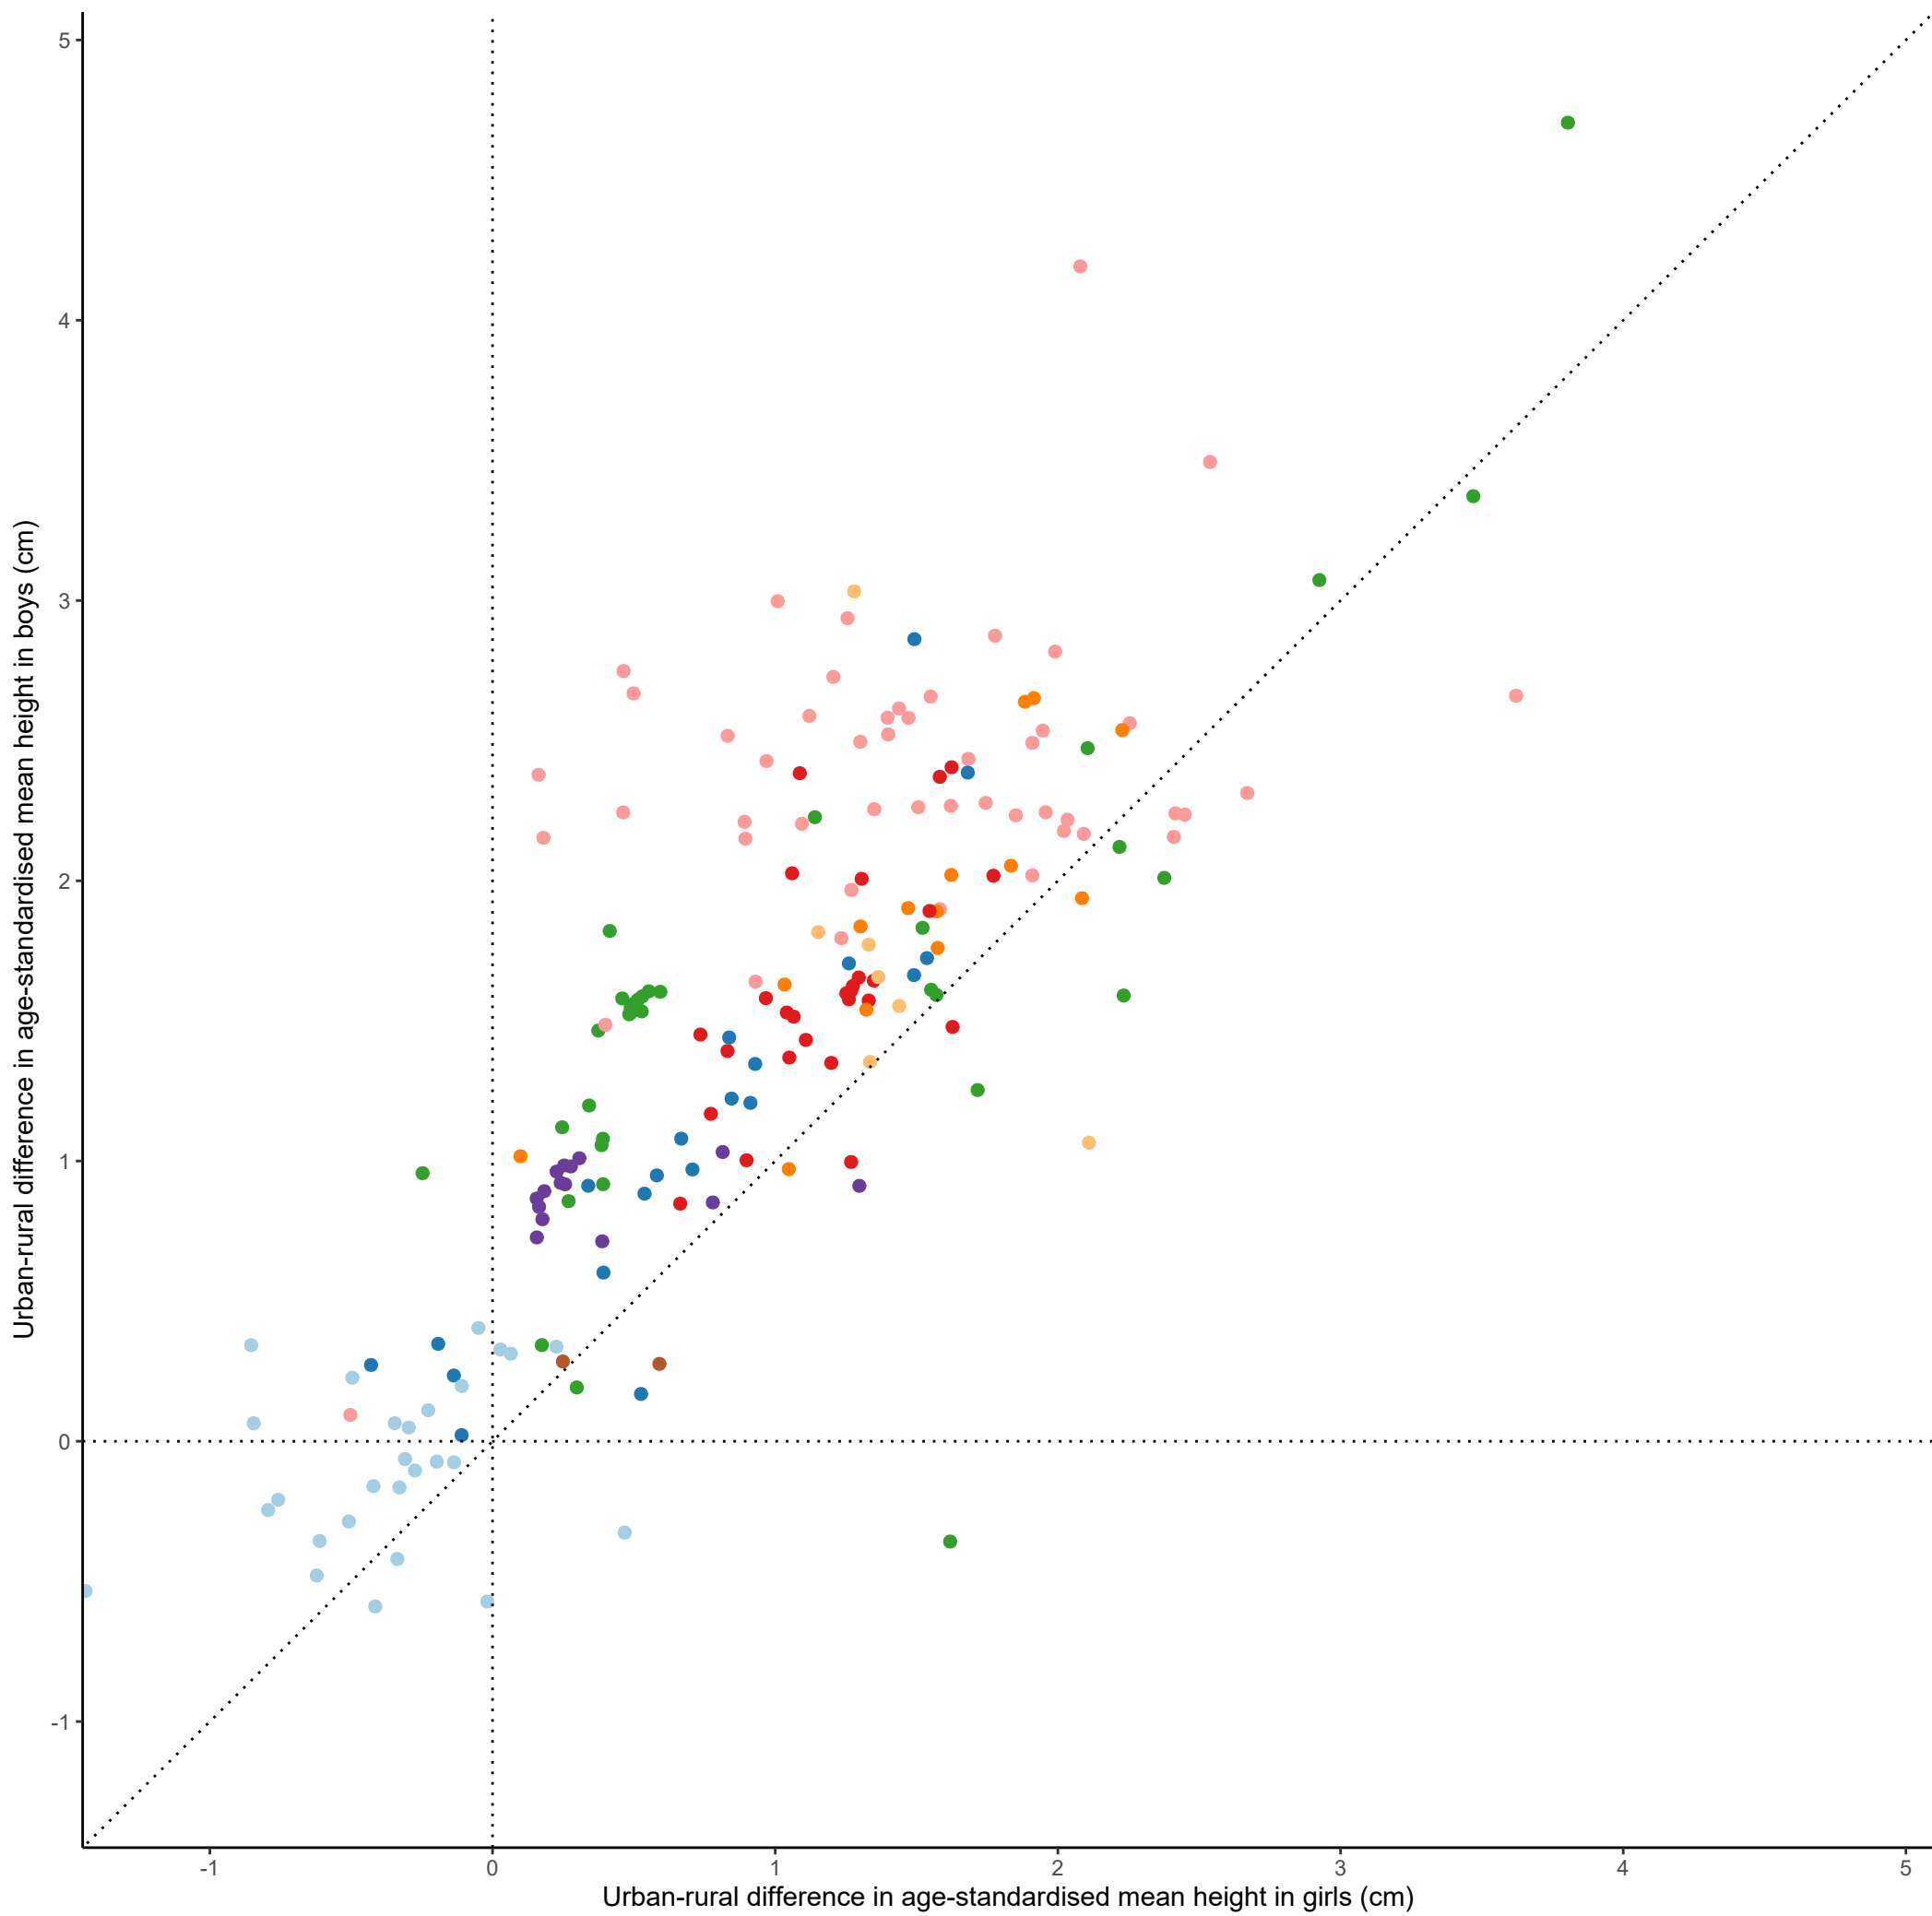

- Central and eastern Europe
- East and southeast Asia
- High-income western
- Oceania
- Sub-Saharan Africa
- Central Asia, Middle East and north Africa
- High-income Asia Pacific
- Latin America and Caribbean
- South Asia

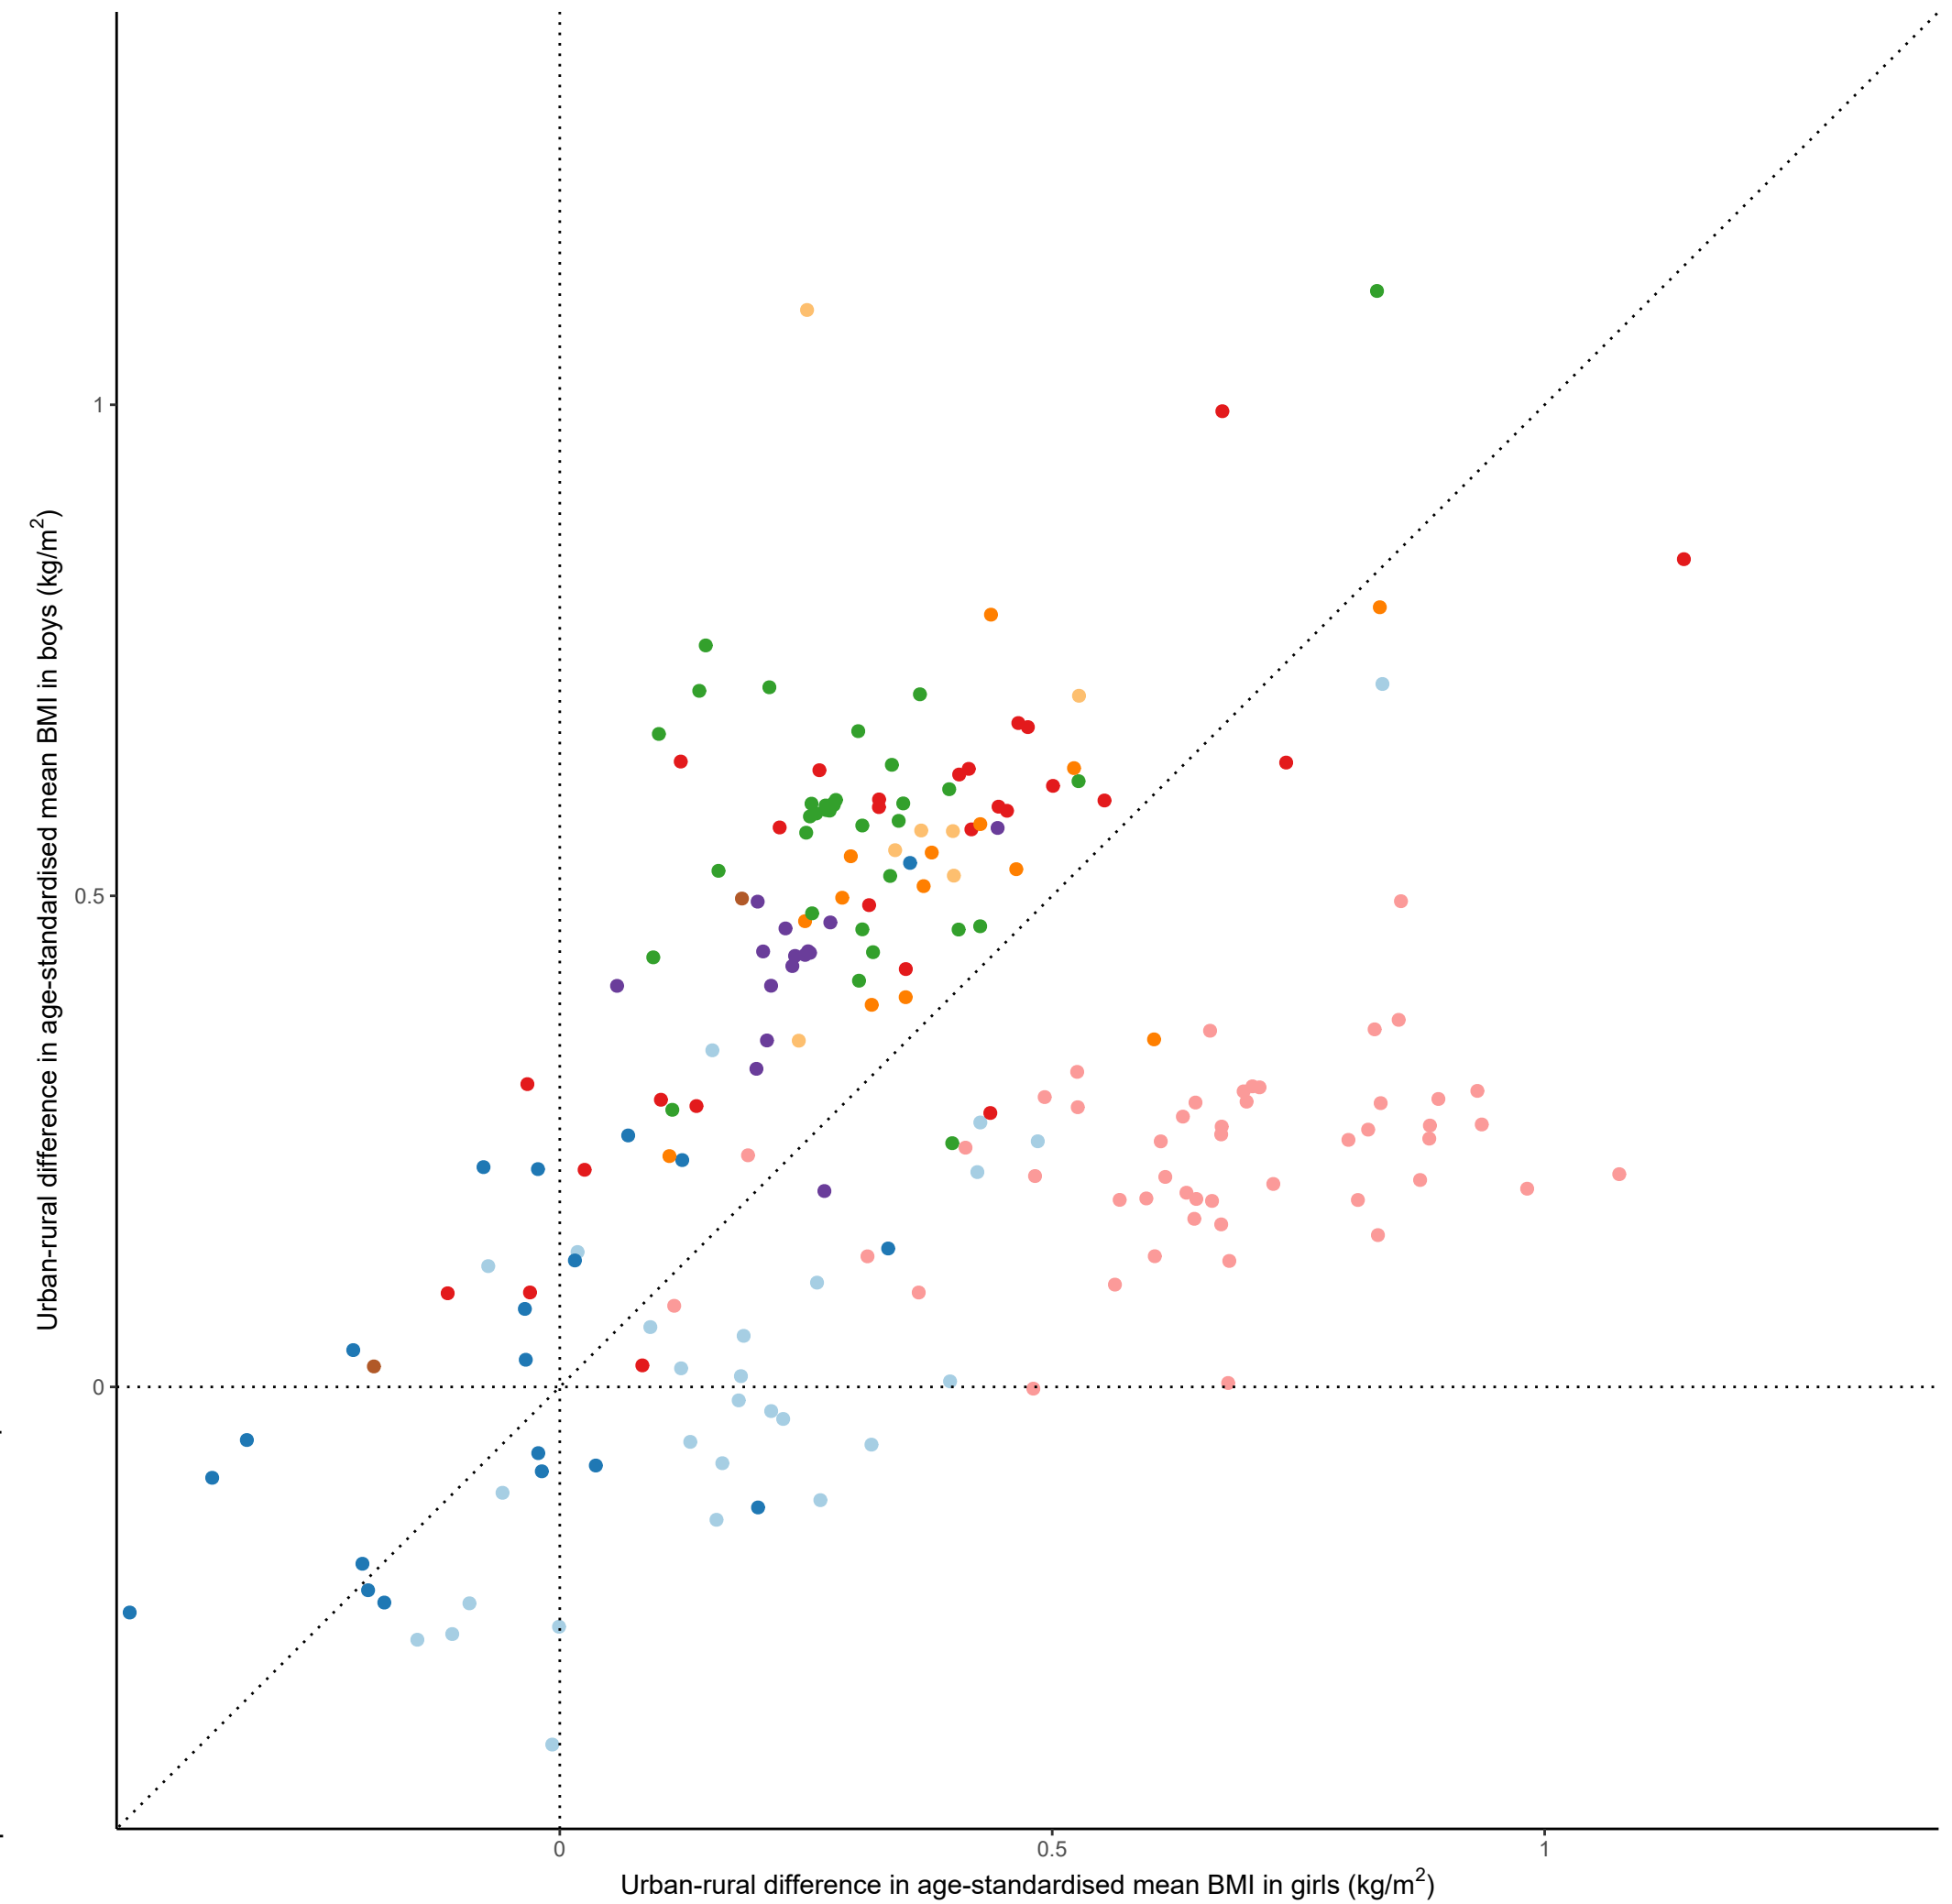

- Central and eastern Europe
- East and southeast Asia
- High-income western
- Oceania
- Sub-Saharan Africa
- Central Asia, Middle East and north Africa
- High-income Asia Pacific
- Latin America and Caribbean
- South Asia

**Supplementary Figure 4.** Change in the urban-rural height and body-mass index (BMI) difference from 1990 to 2020, by age.

(A) Change in urban-rural difference in mean height in relation to change in mean rural height at ages 5, 10, 15 and 19 years. (B) Change in urban-rural difference in mean BMI in relation to change in mean BMI in at ages 5, 10, 15 and 19 years. (C) Change in urban-rural difference in mean height and urban-rural difference in mean BMI at ages 5, 10, 15 and 19 years.

Each solid arrow in lighter shading shows one country, beginning in 1990 and ending in 2020. The dashed arrows in darker shade show the regional averages, calculated as the unweighted arithmetic mean of the values for all countries in each region along the horizontal and vertical axes. For urban-rural difference, a positive number shows higher urban mean height and BMI and a negative number shows higher rural mean height and BMI. The dark vertical dashed lines indicate the median of the WHO reference population. For BMI, the lighter vertical dashed lines are placed one standard deviation below and above the median of the WHO reference population.

We did not estimate the difference between rural and urban height and BMI for areas classified as entirely urban (Bermuda, Kuwait, Nauru and Singapore) or entirely rural (Tokelau).



# A Girls

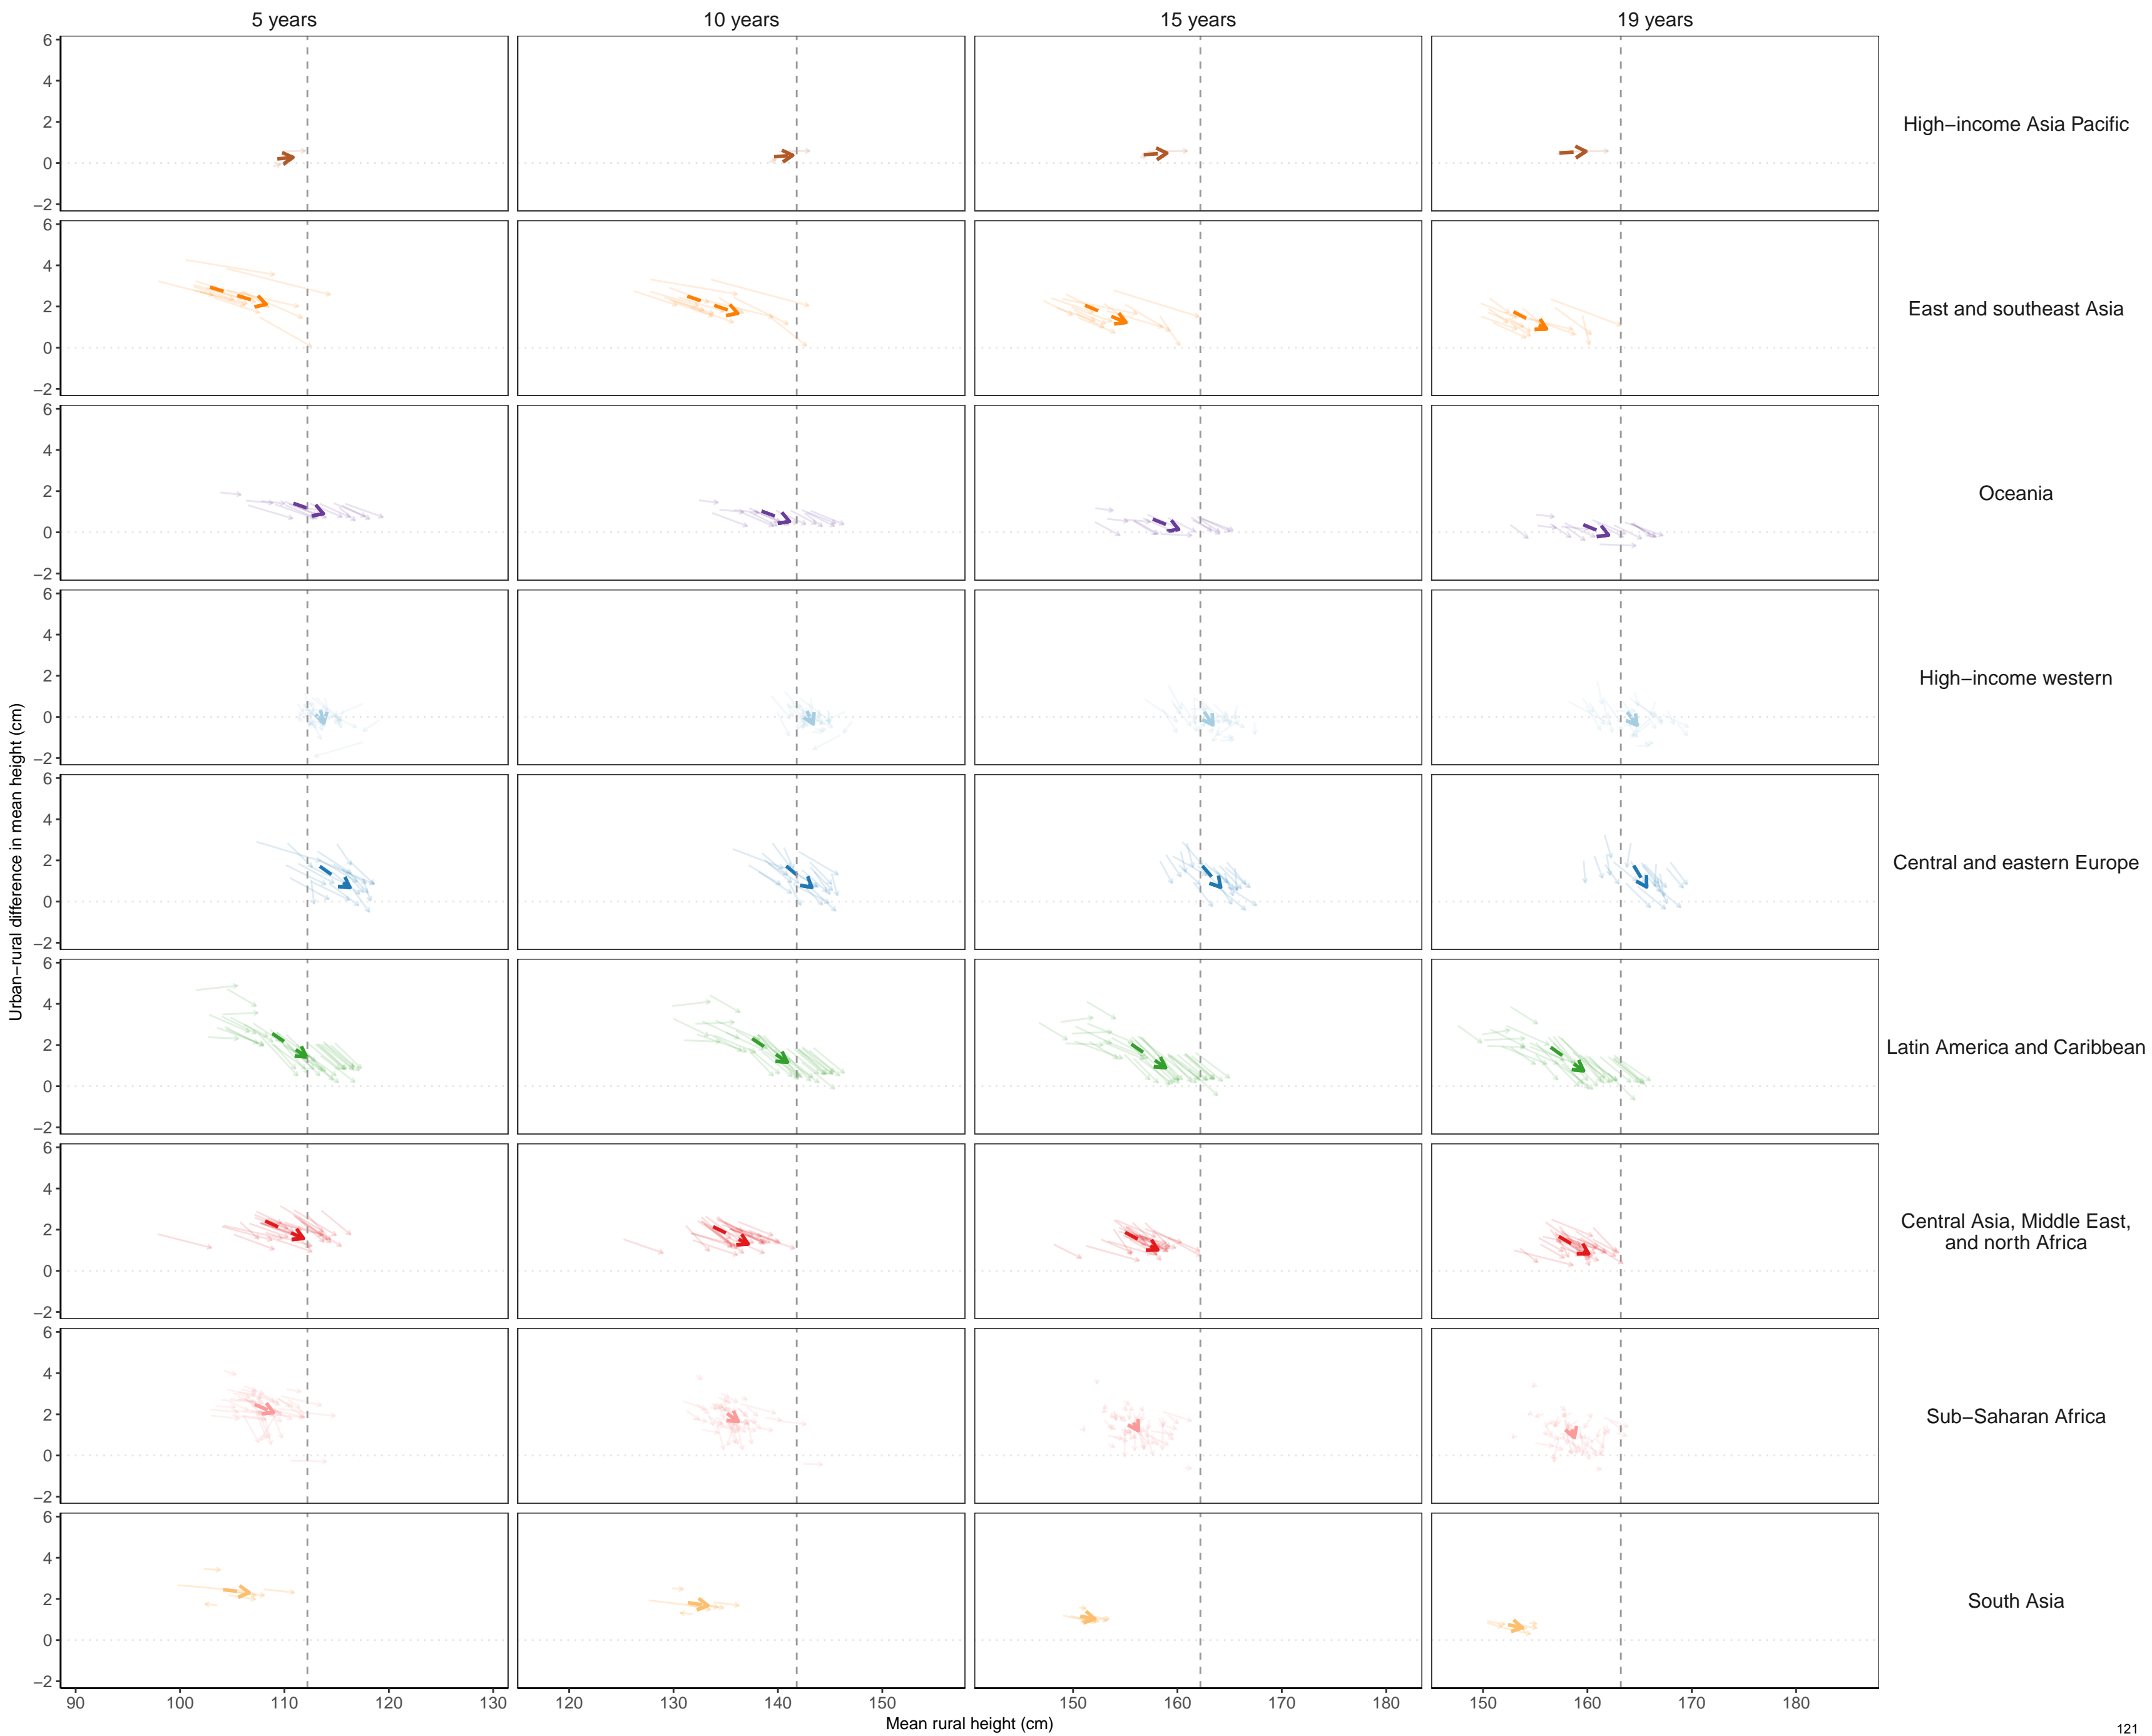



# A Boys

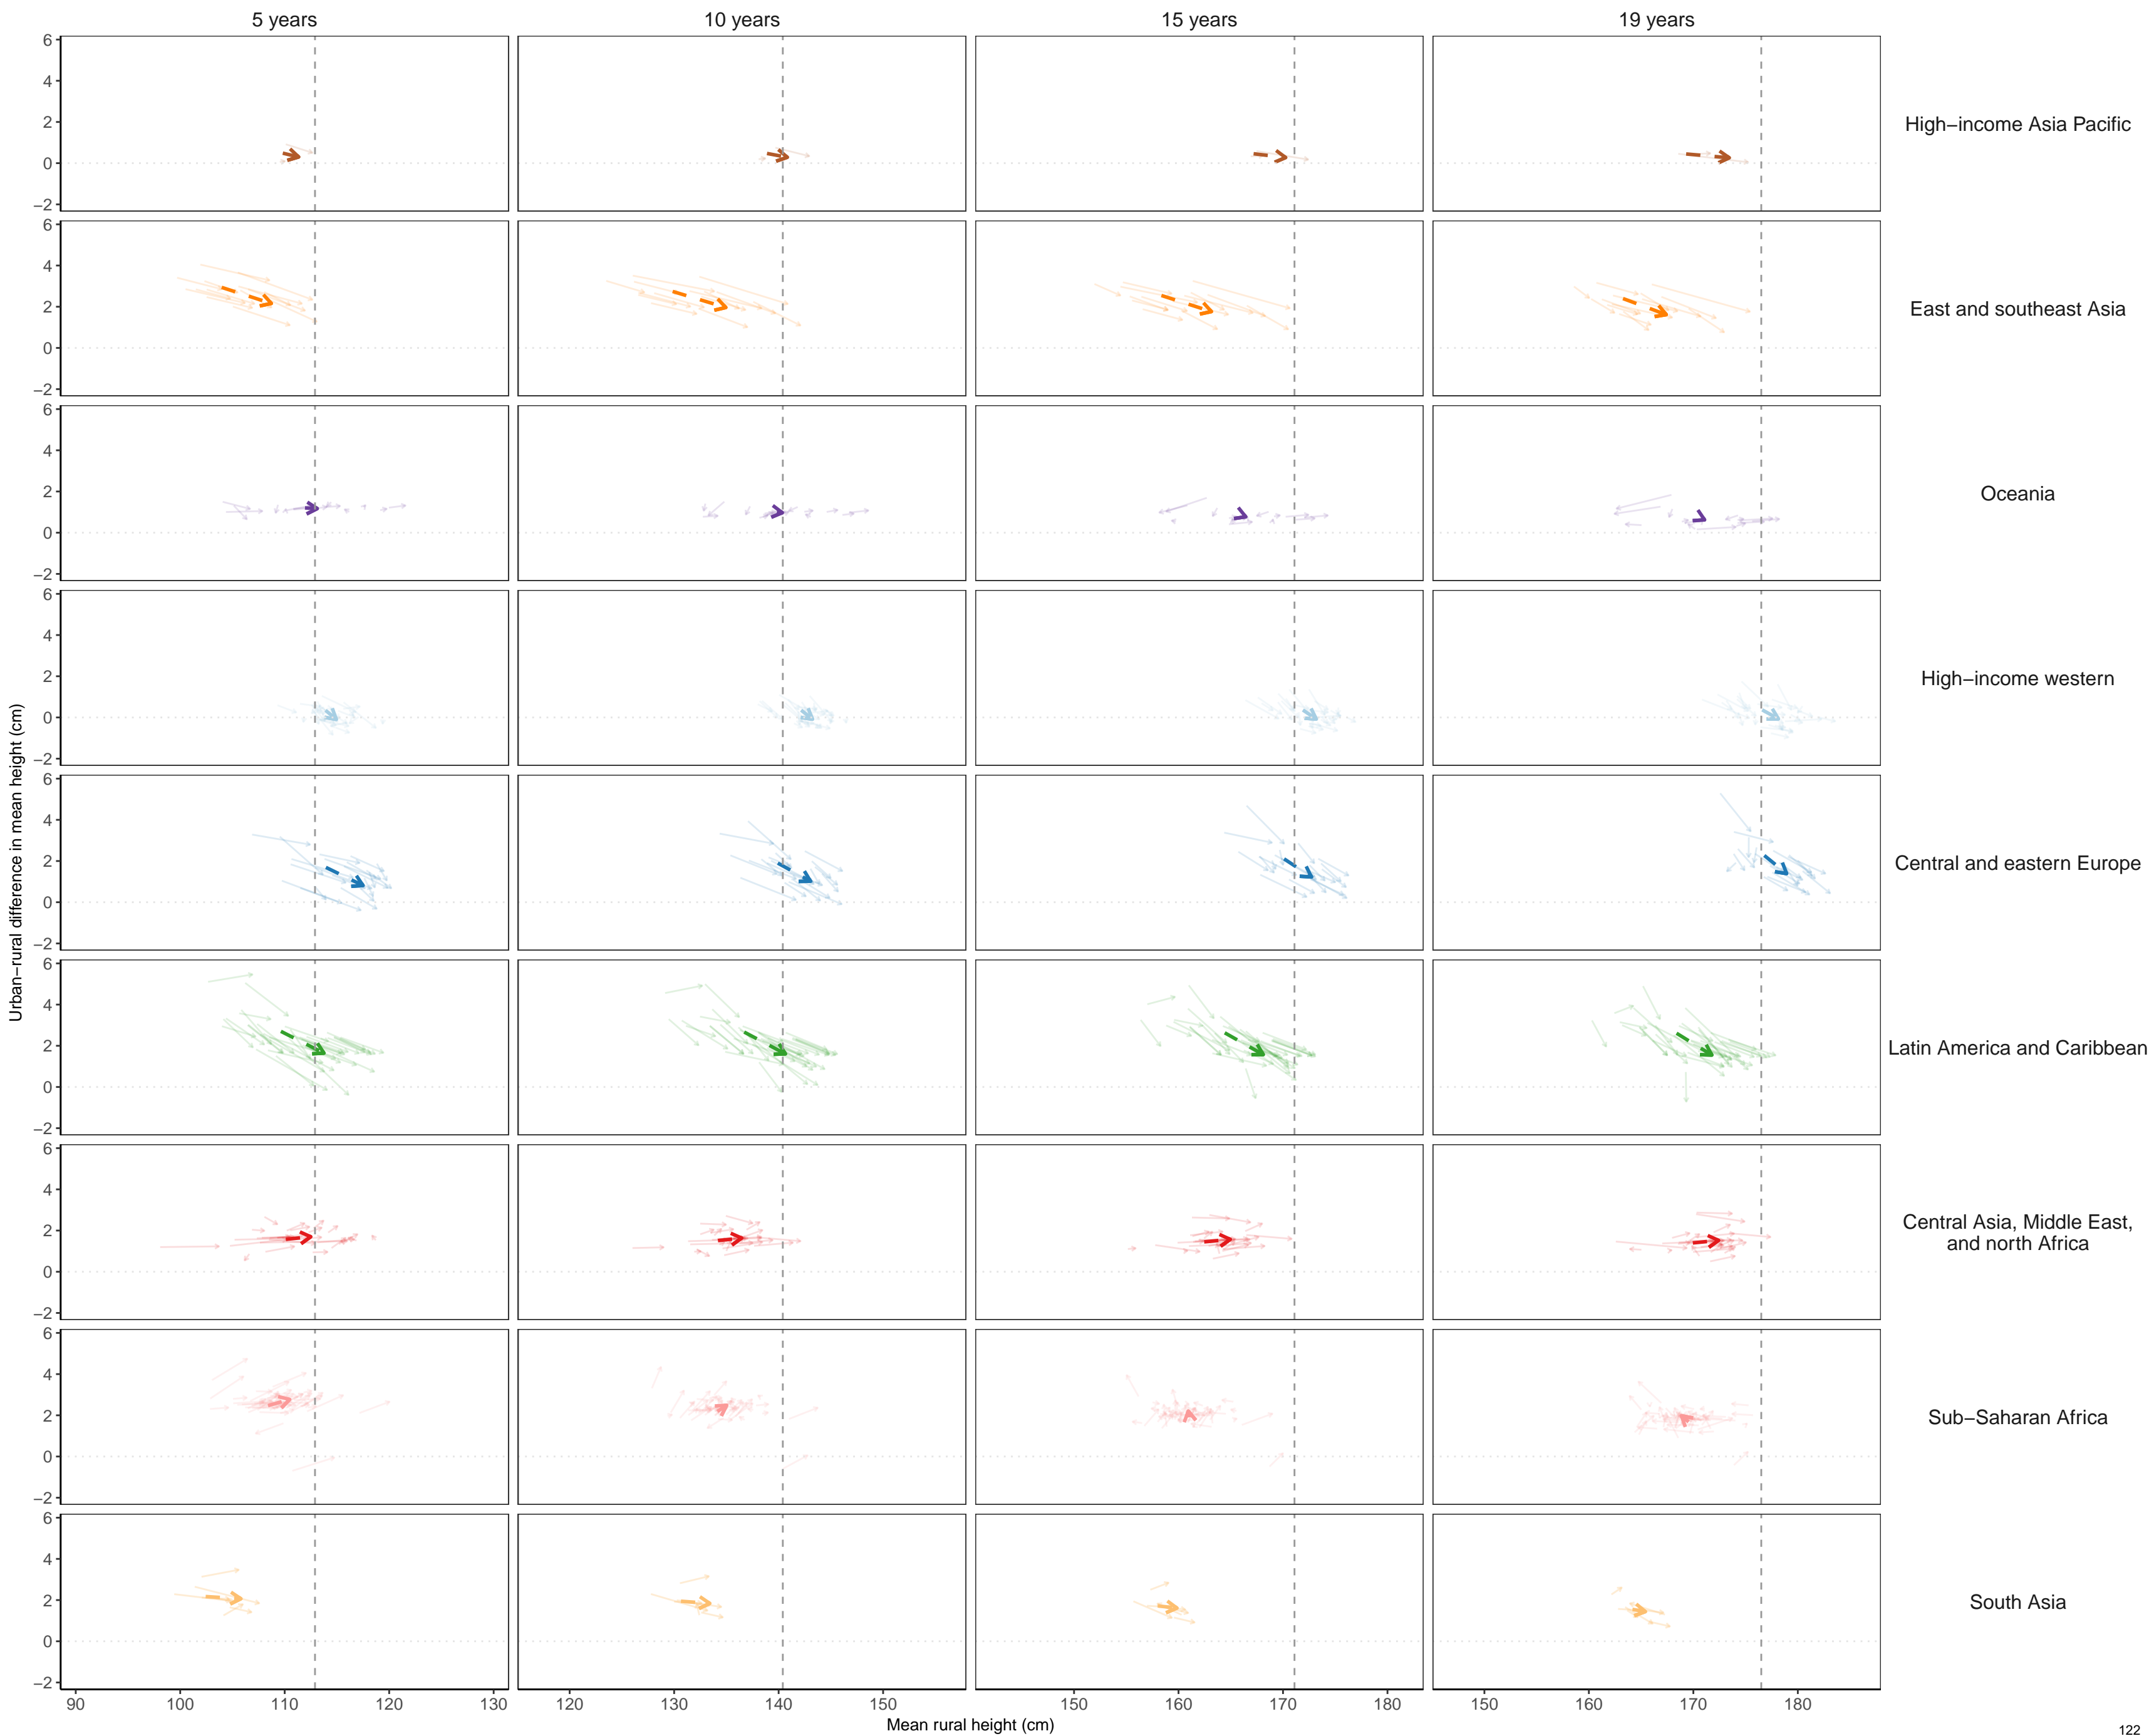

# B Girls

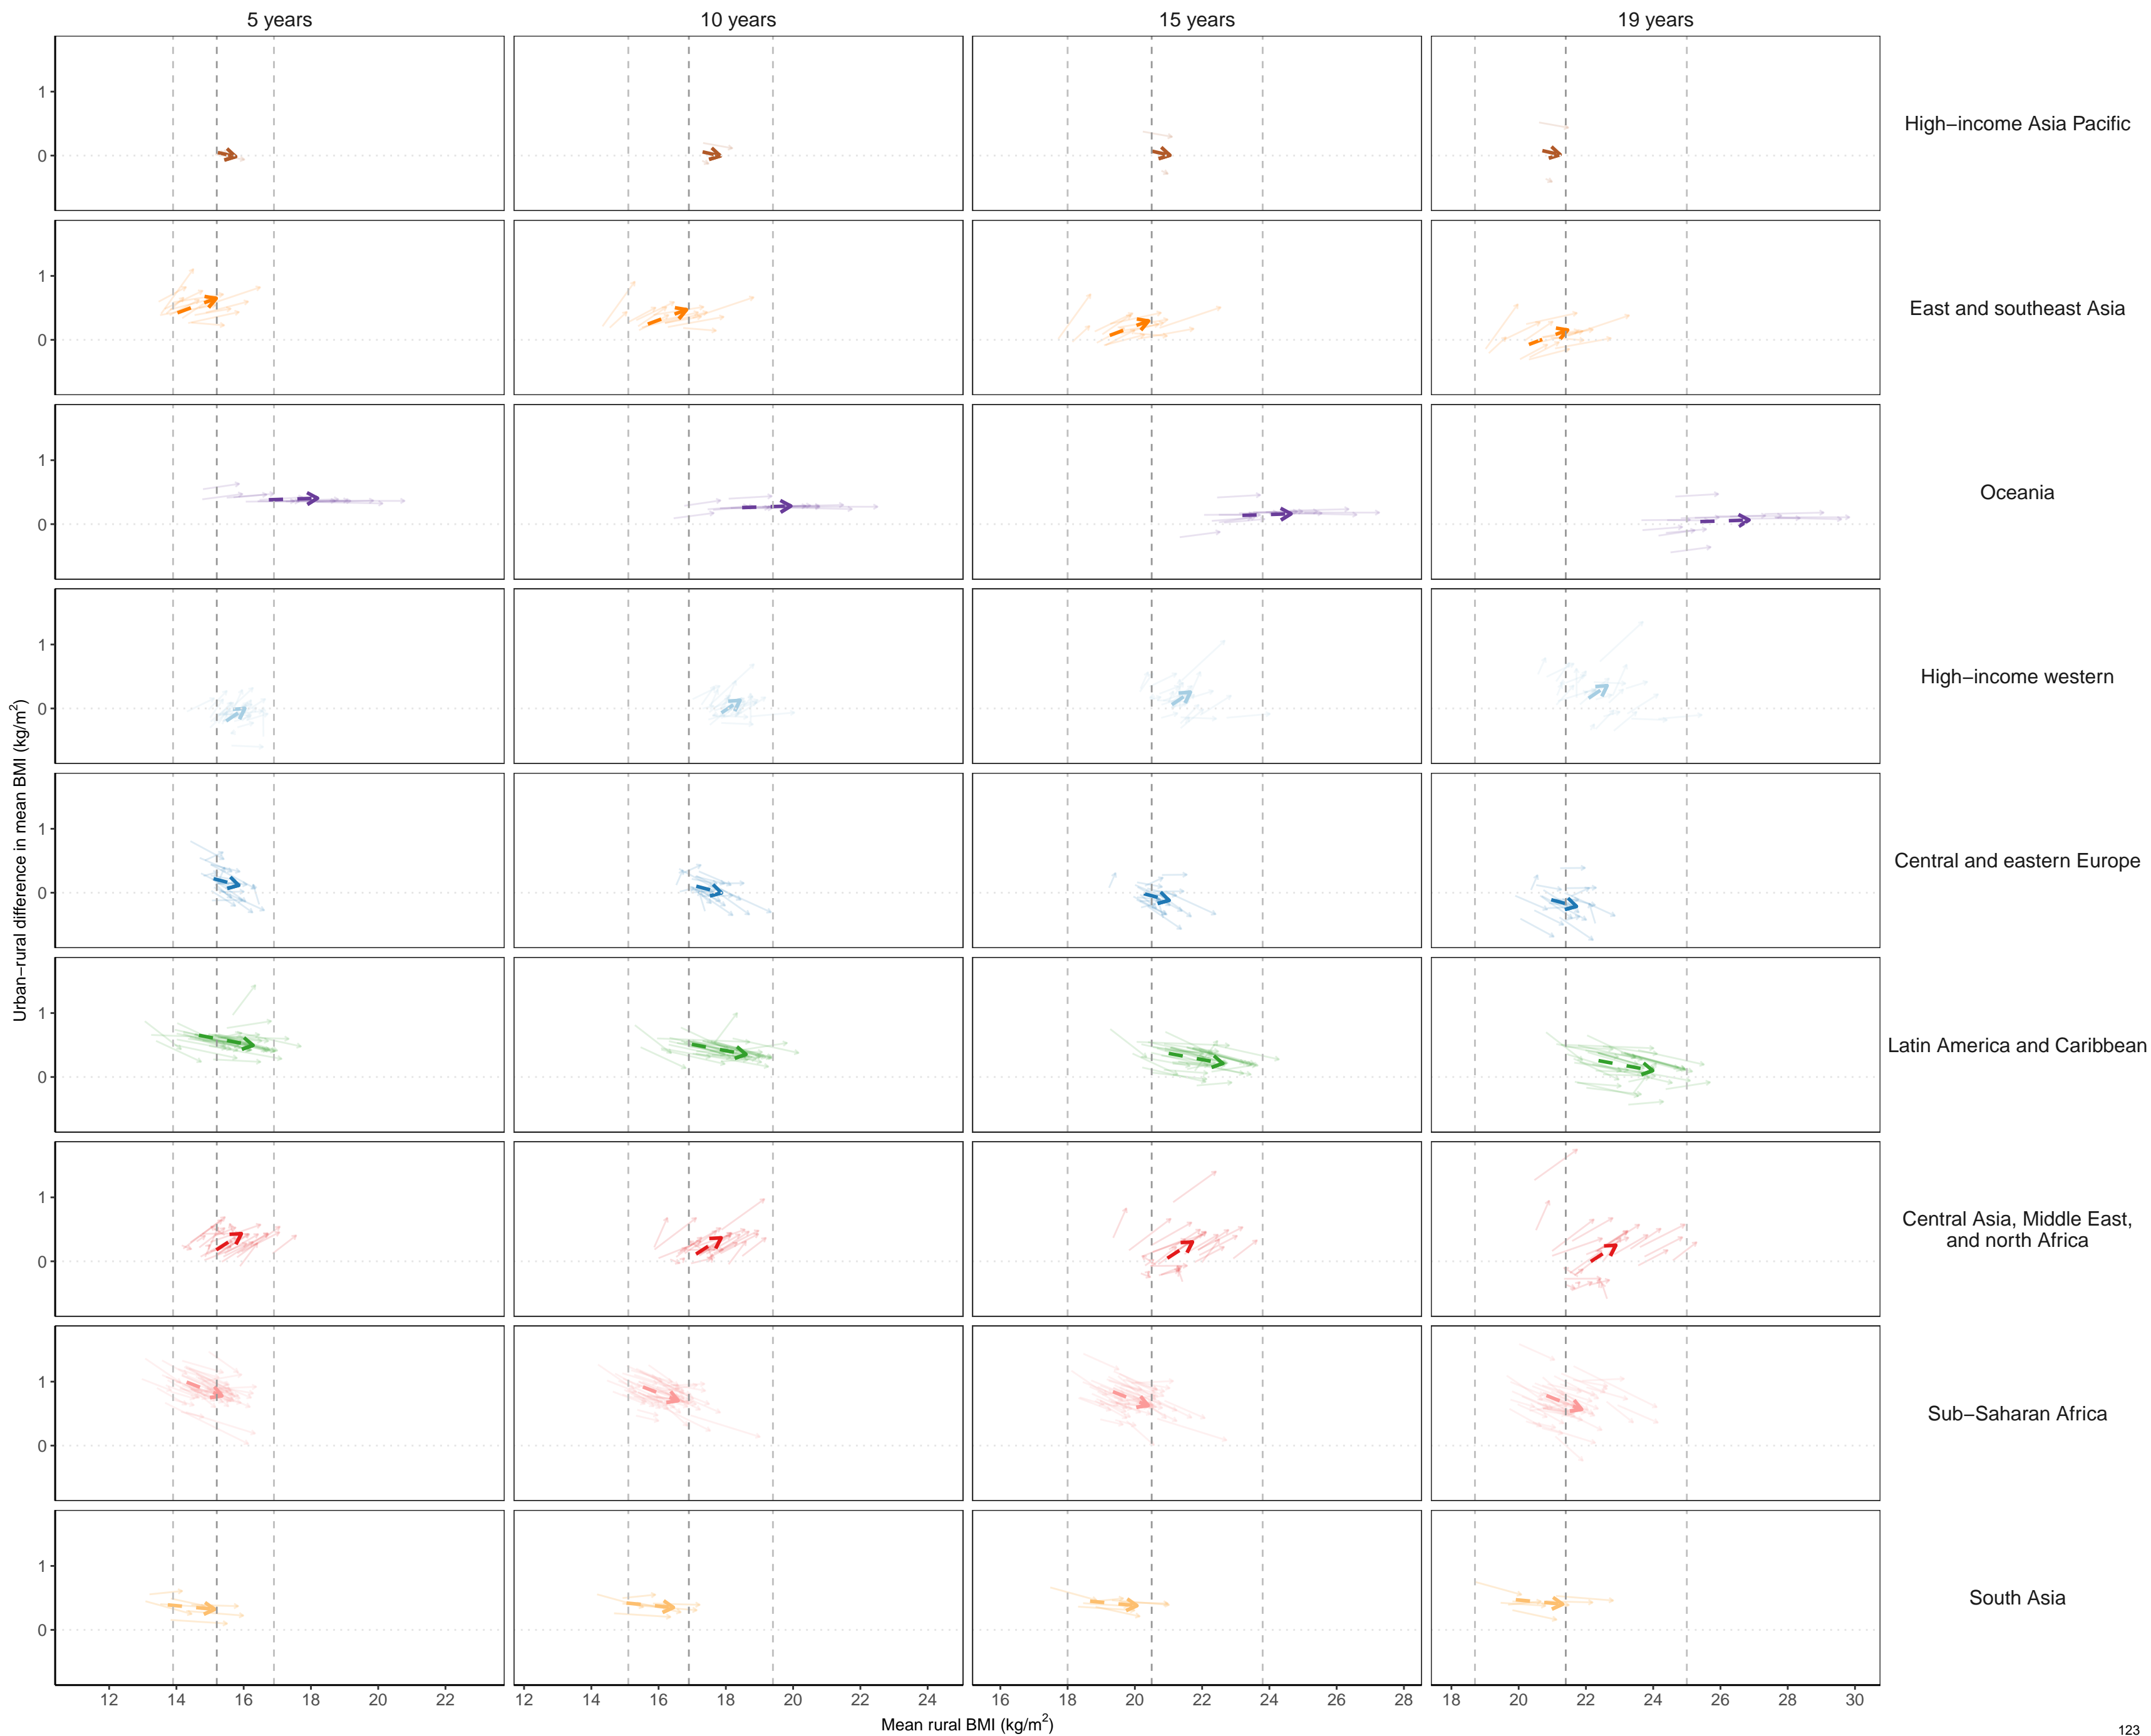

# B Boys

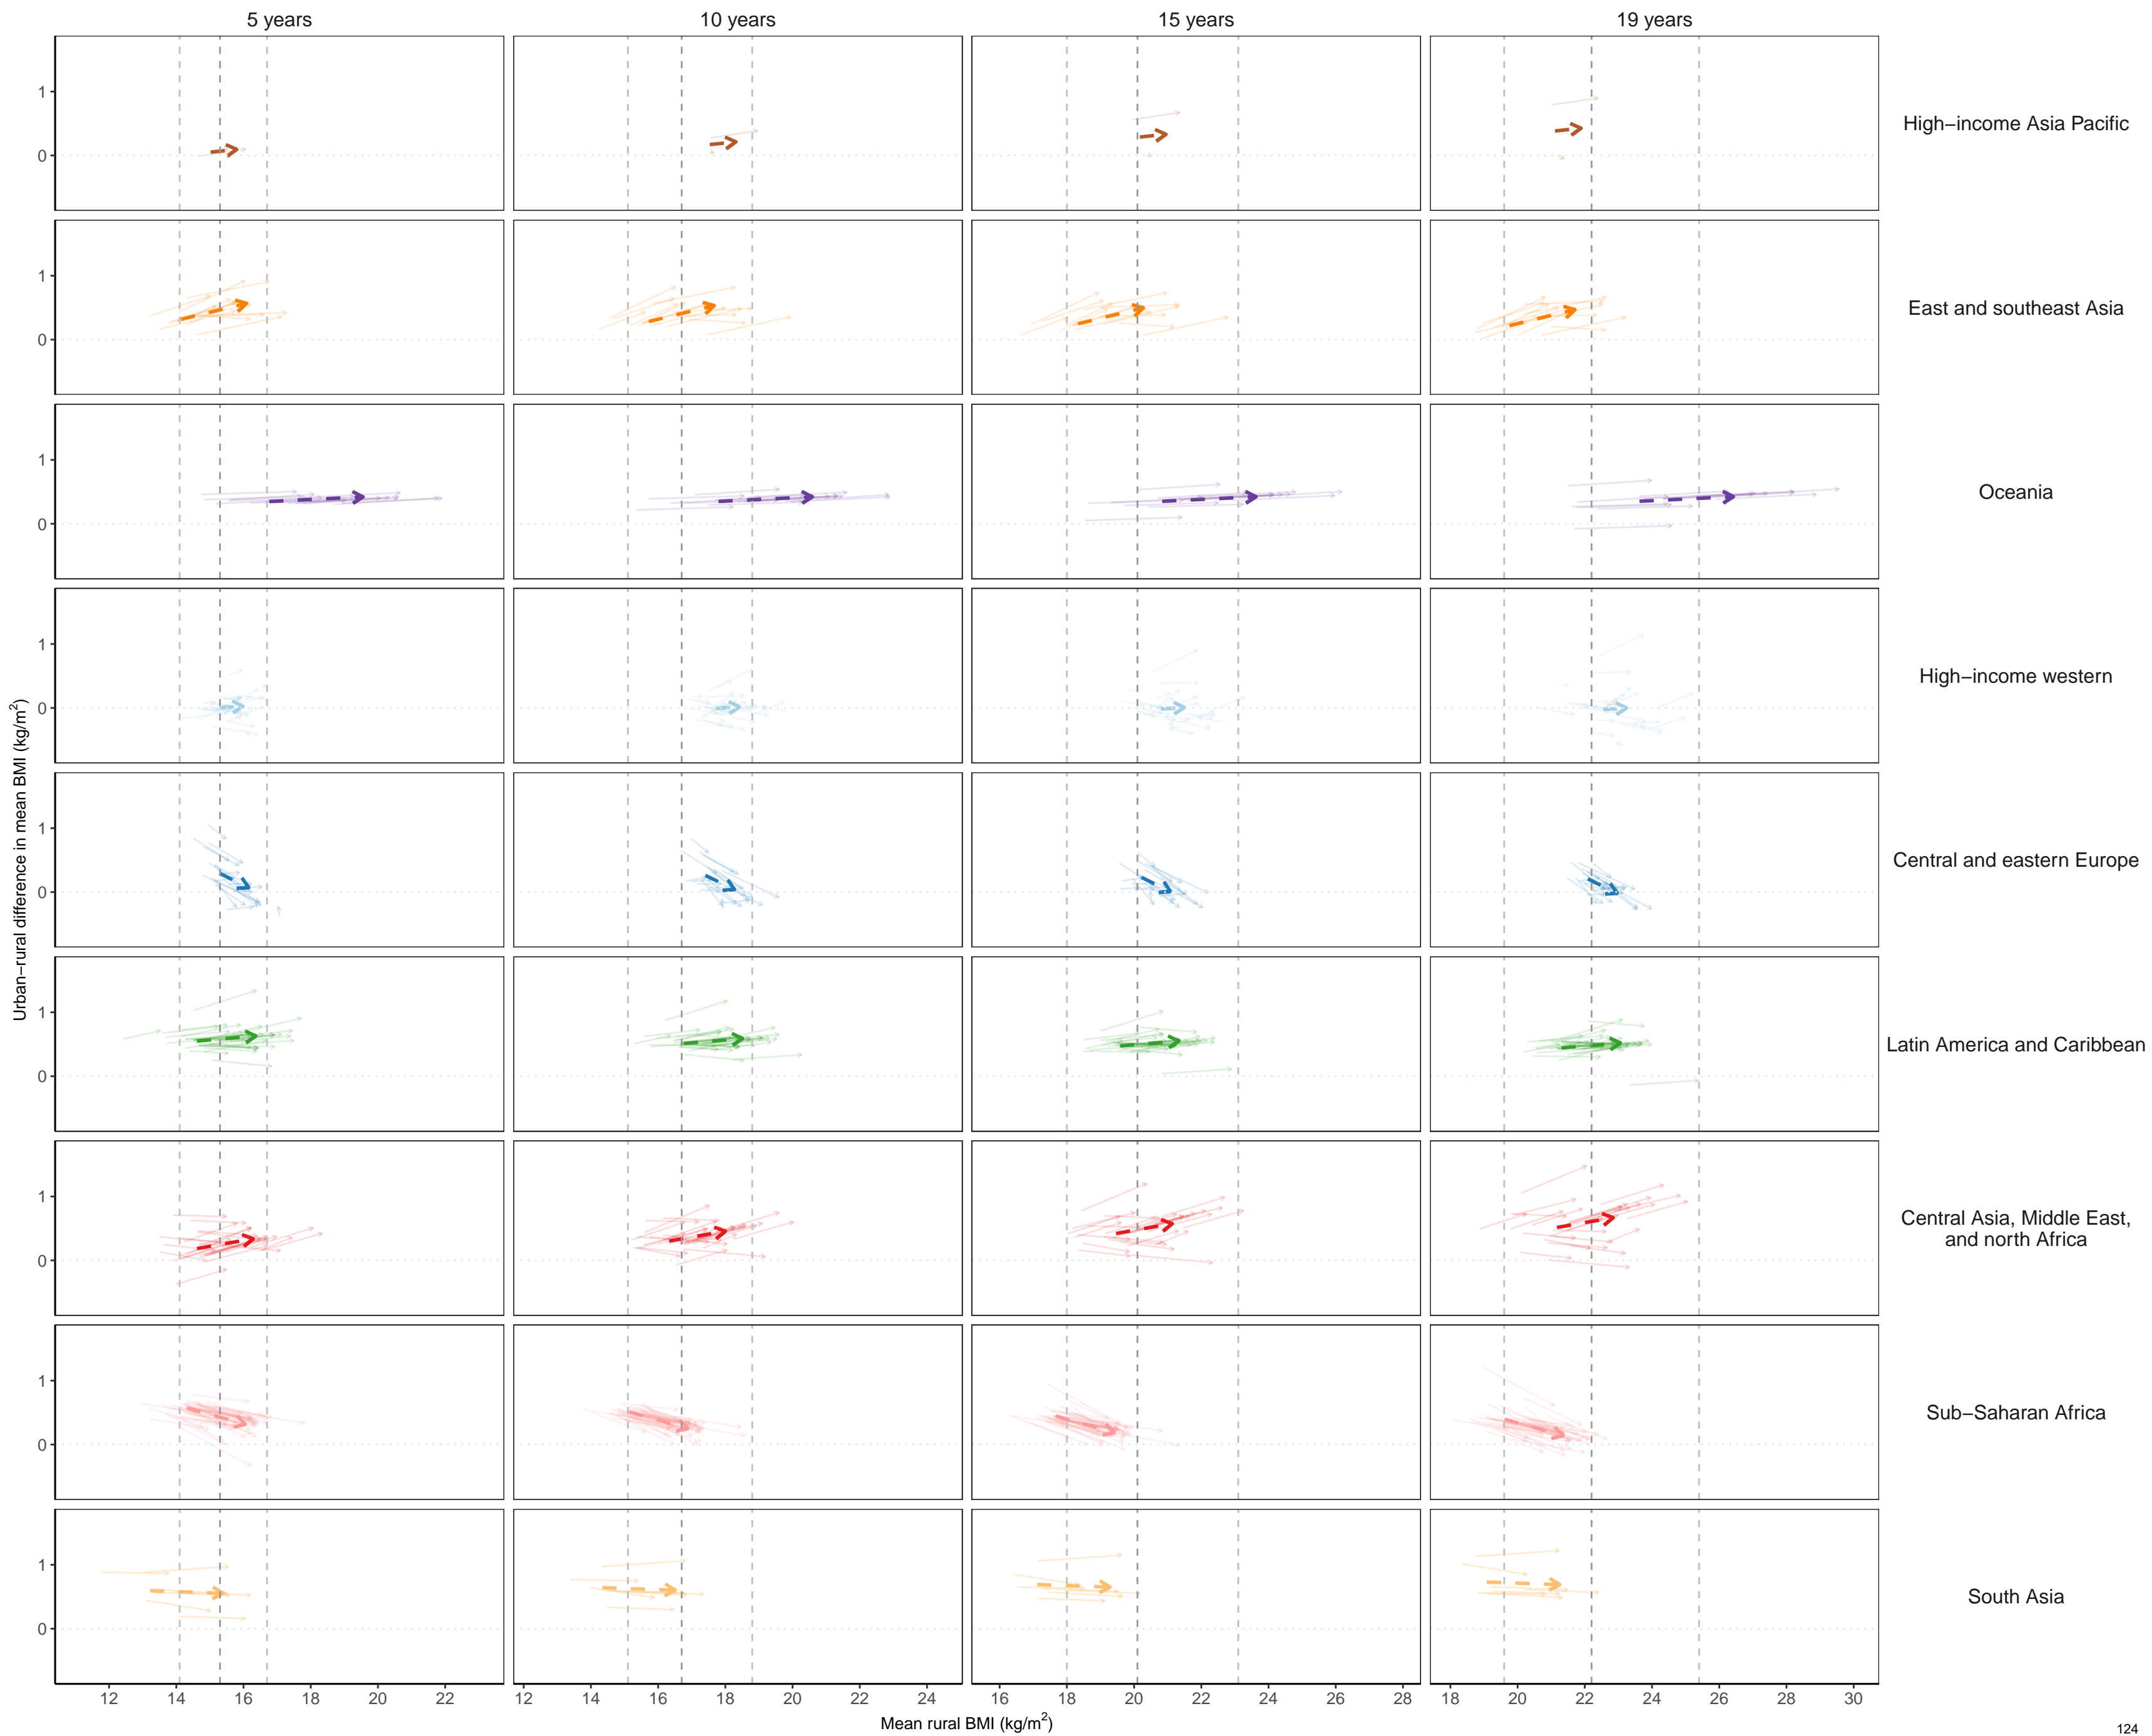

# C Girls

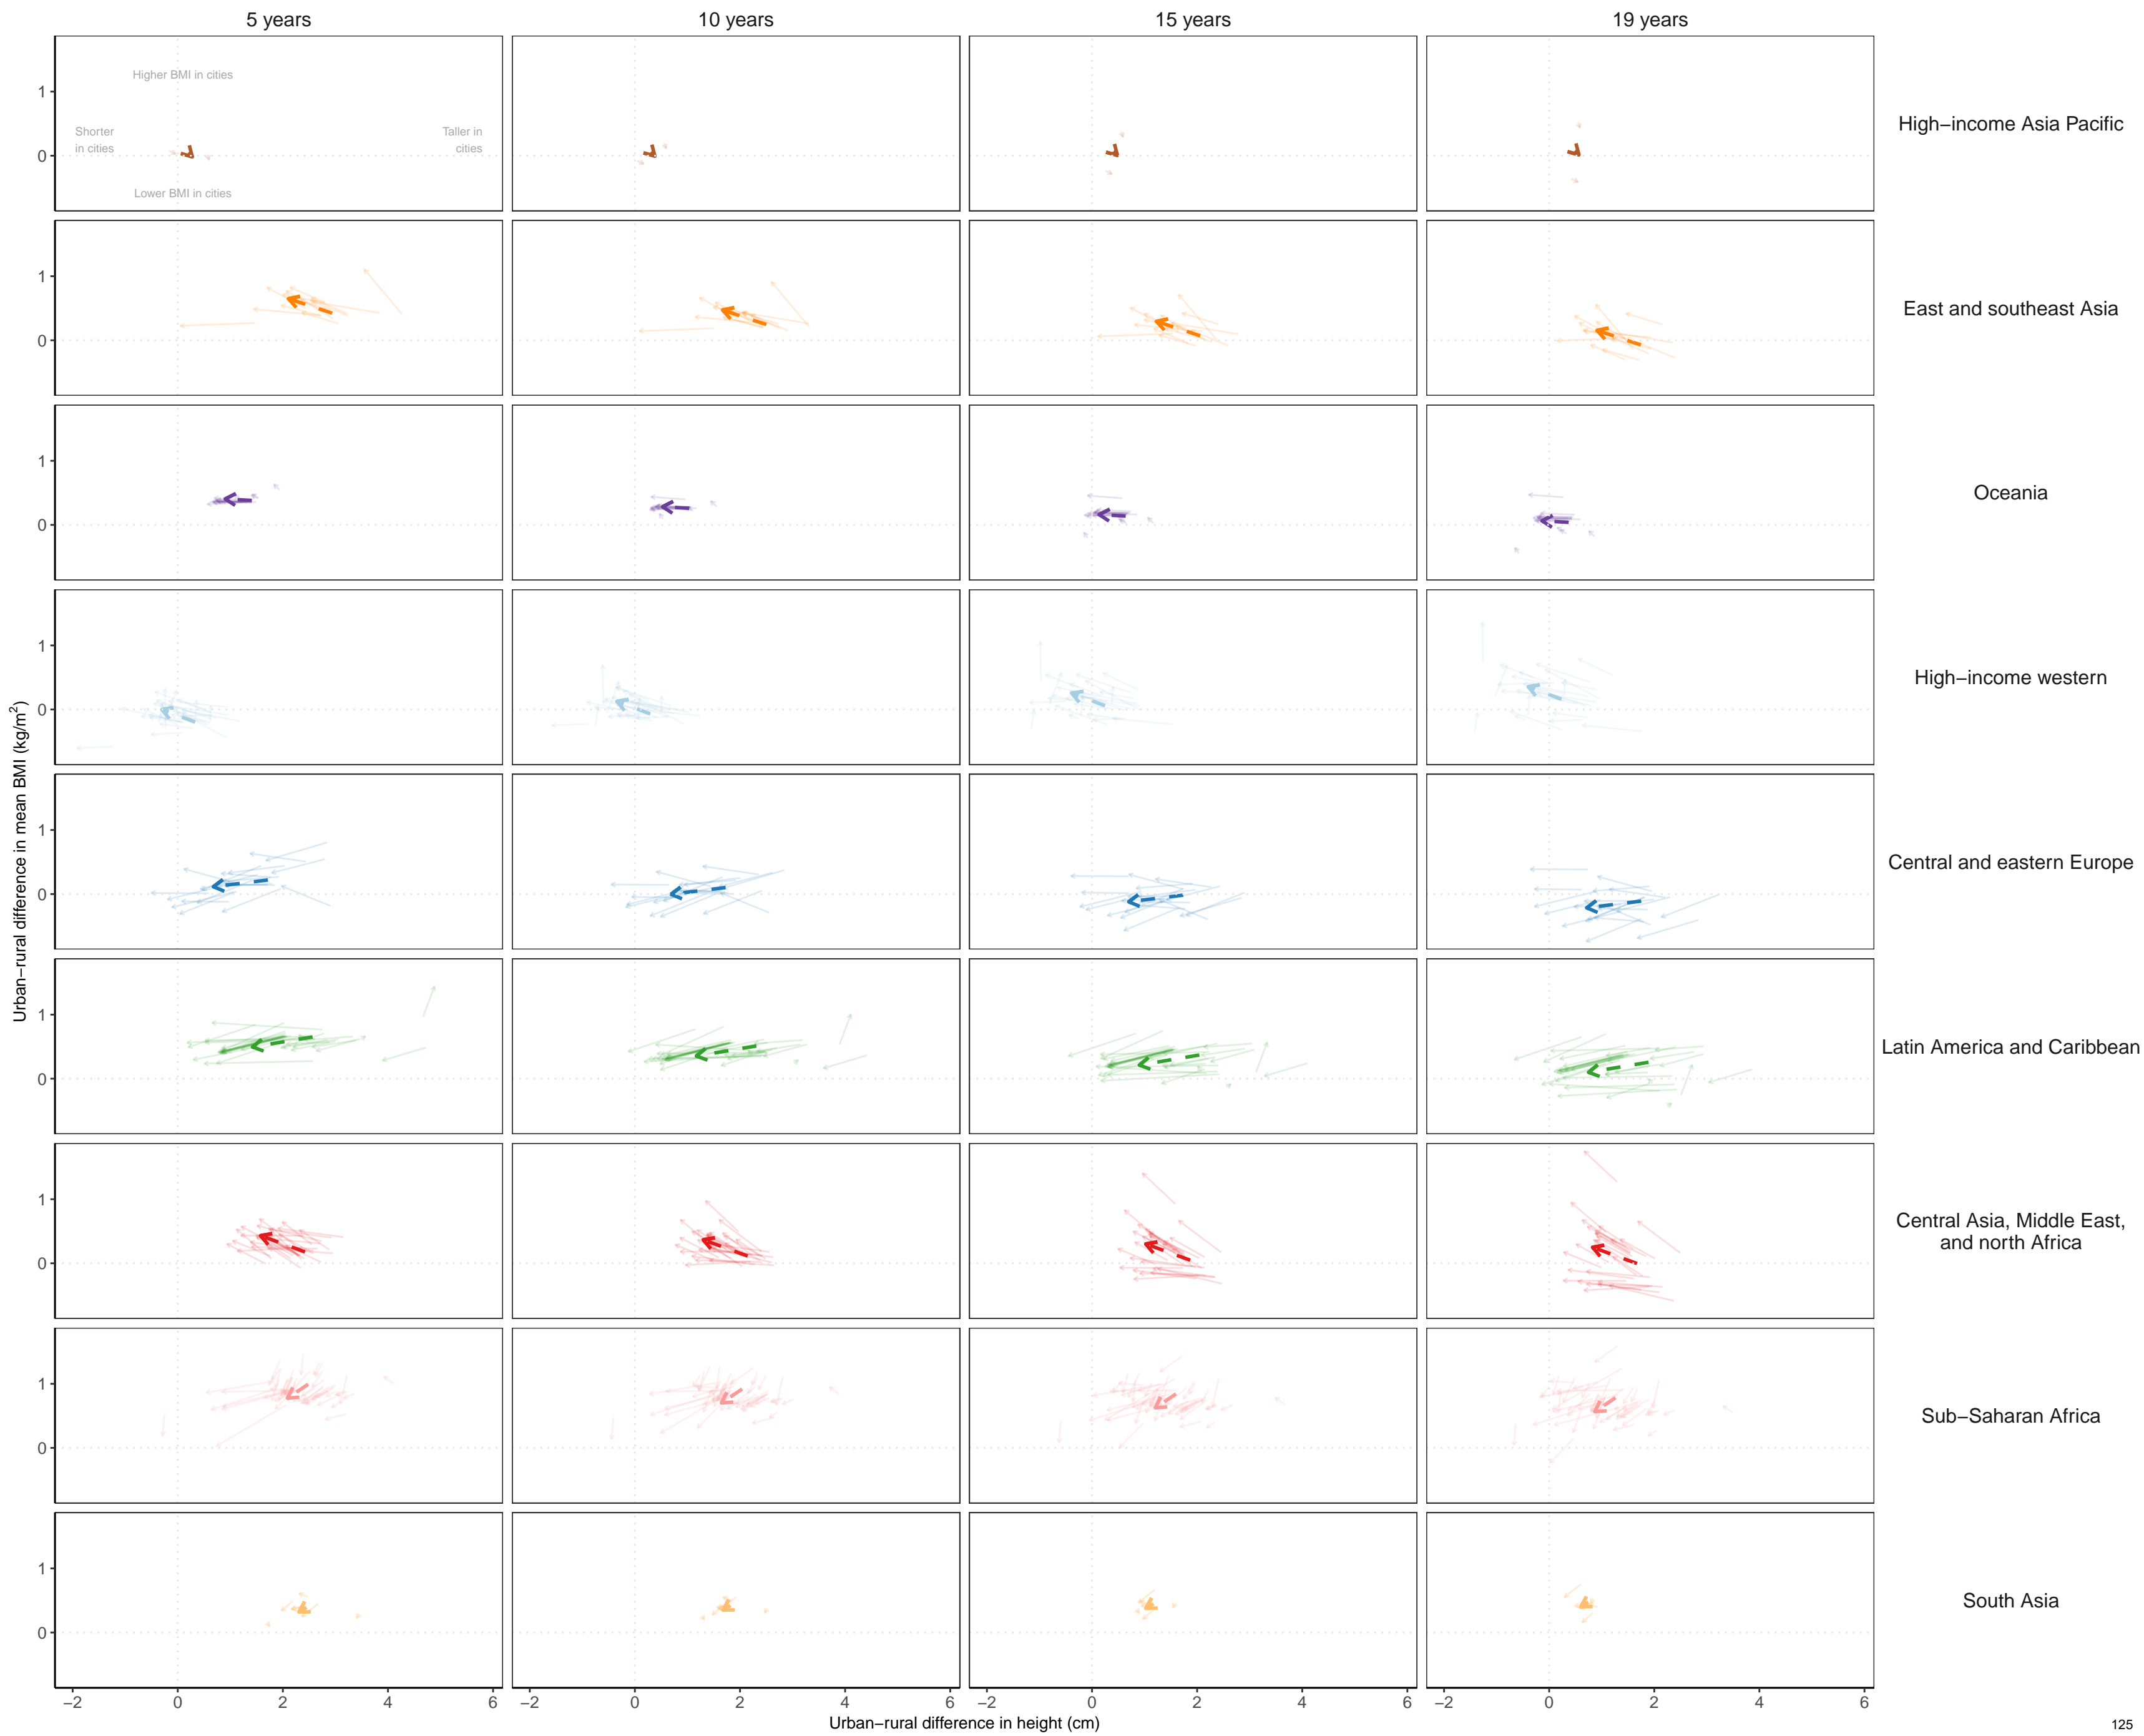

# C Boys

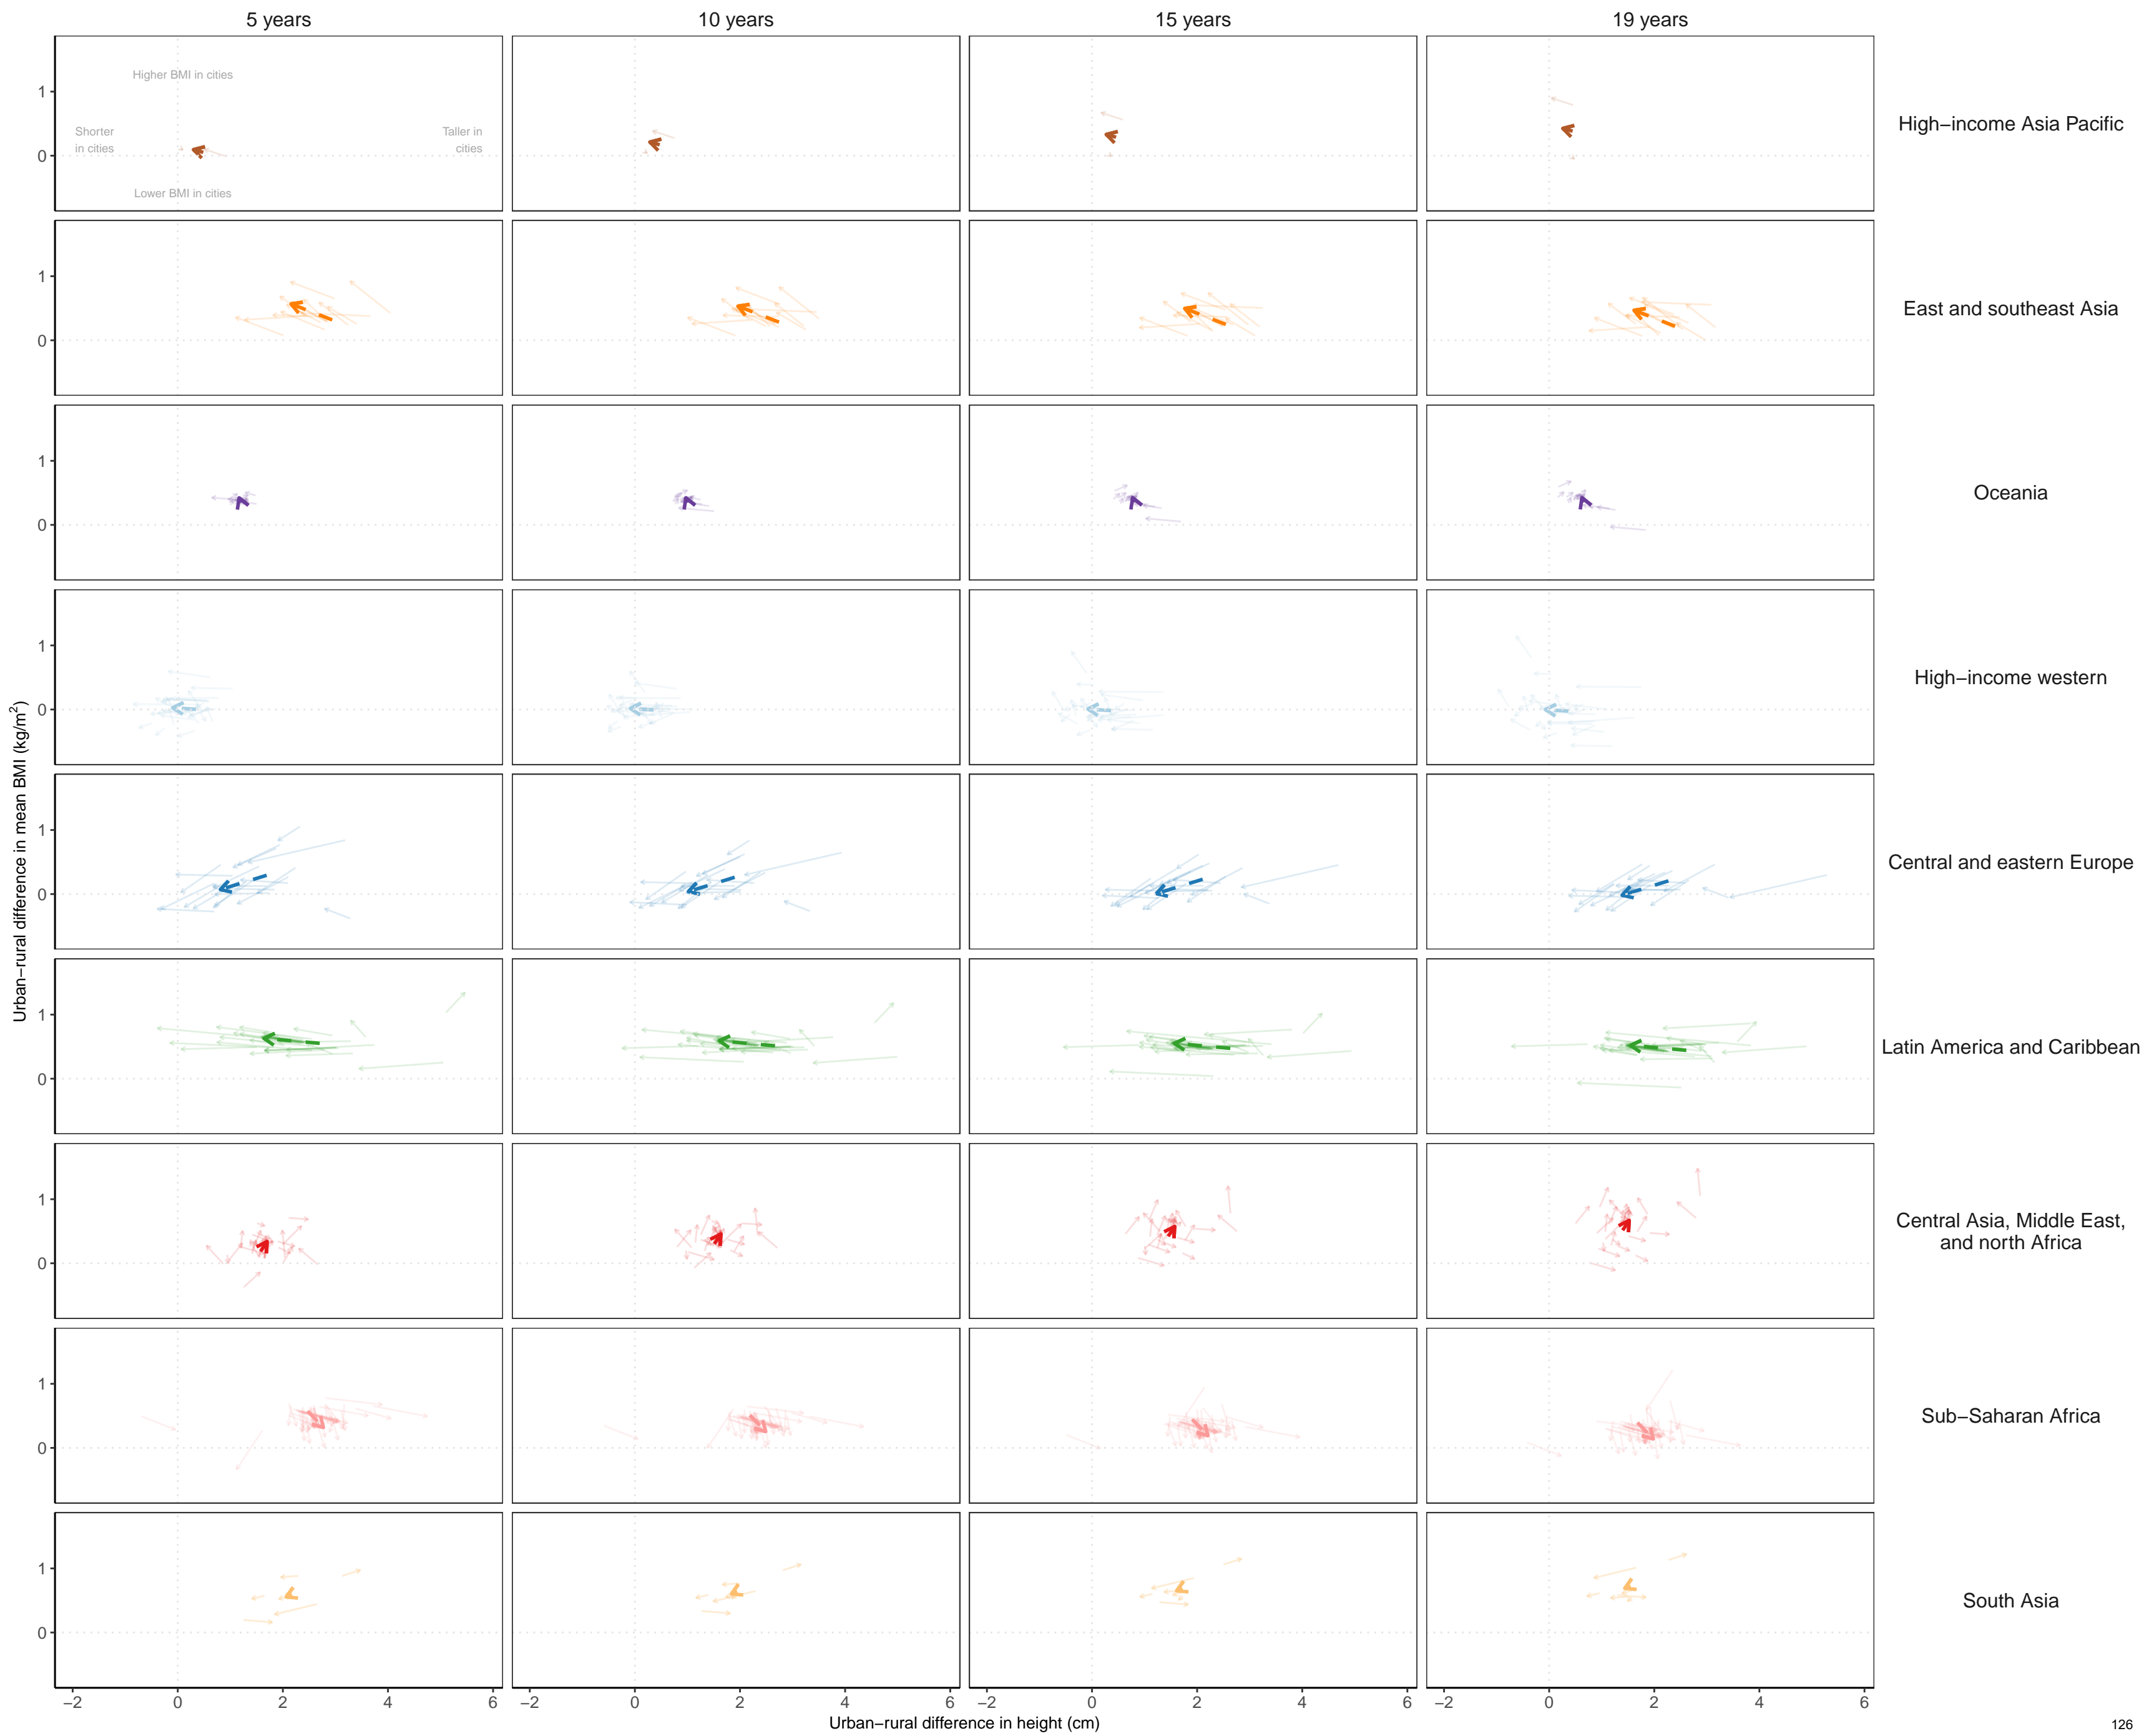

**Supplementary Figure 5.** Urban and rural height in 2020 and change from 1990 to 2020, by age.

The maps show mean height in 2020 and change from 1990 to 2020, by urban and rural place of residence and country for girls and boys at ages 5, 10, 15 and 19 years. The density plot below each map shows the distribution of estimates across countries. The top right graph in each panel shows the mean height in 2020 for all countries. The height of each column is the posterior mean estimate shown together with its 95% credible interval. Countries are ordered by region and super-region. The bottom right graph in each panel shows the change from 1990 to 2020 in mean height in relation to the uncertainty of the change measured by posterior standard deviation. Each point shows one country. Shaded areas approximately show the posterior probability (PP) of an estimated change being a true increase or decrease. The PP of a decrease is one minus that of an increase. If an increase in mean height is statistically indistinguishable from a decrease, the PP of an increase and a decrease is 0.50. PPs closer to 0.50 indicate more uncertainty, those towards 1 indicate more certainty of change.

We did not estimate mean rural height in areas classified as entirely urban (Bermuda, Kuwait, Nauru and Singapore), mean urban height in areas classified as entirely rural (Tokelau), or their change over time in these areas, as indicated by grey colour.



Mean height in 2020 (girls, age 5, urban)

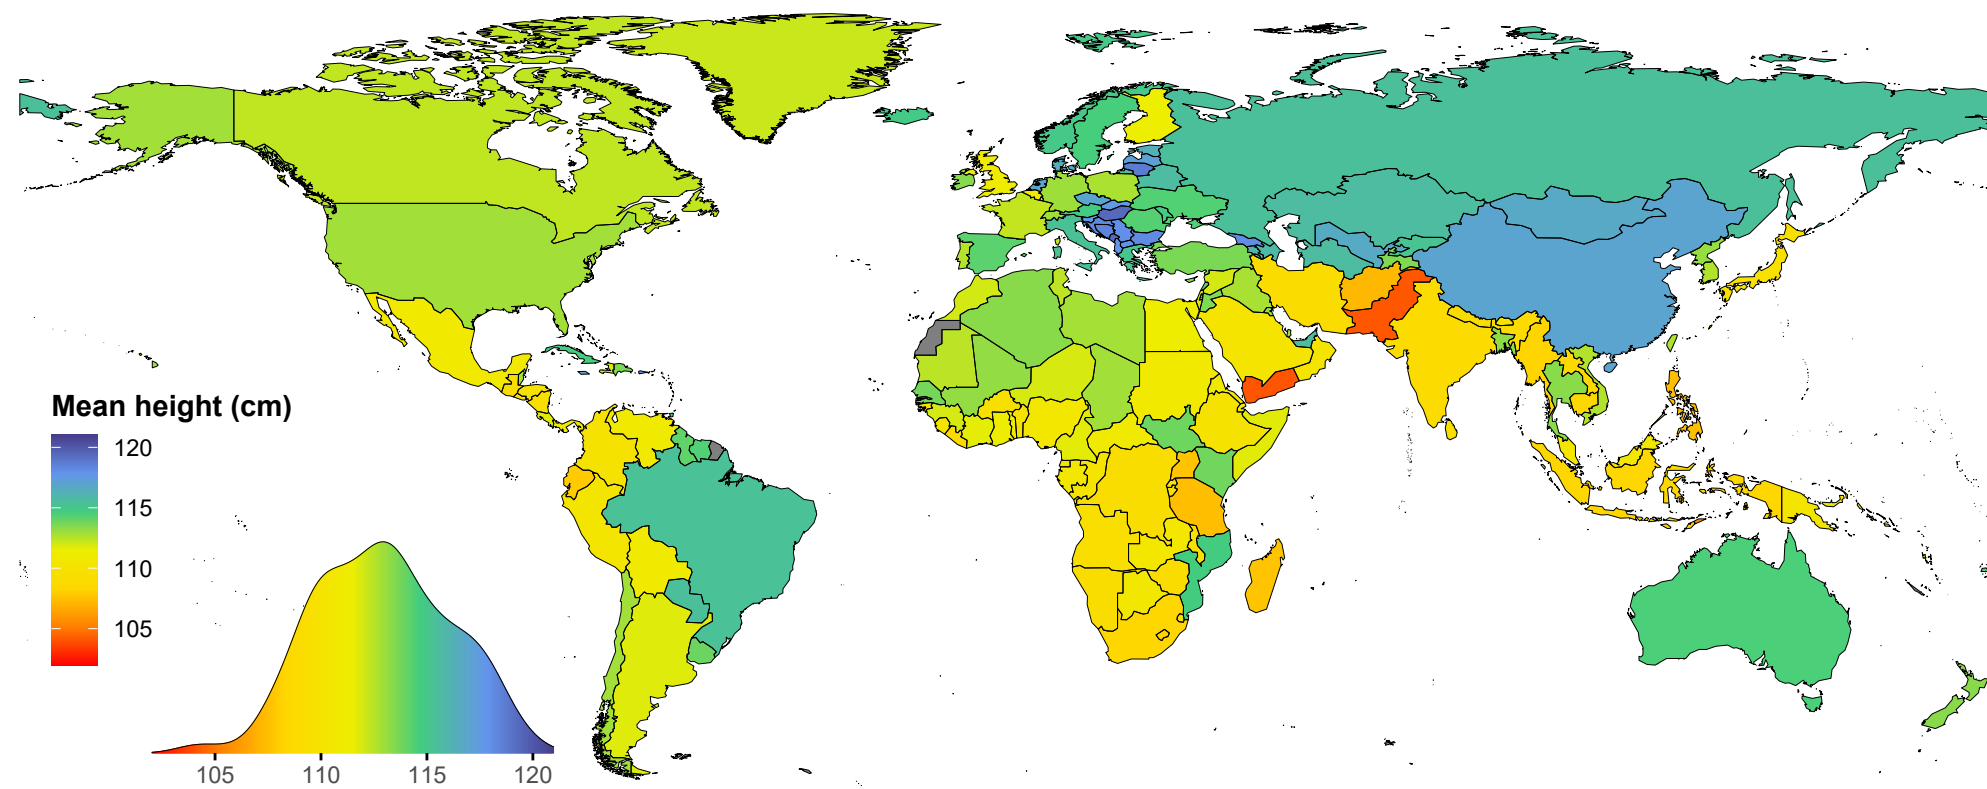

- |                                                               |                                                                      |                                                            |                                                              |
|---------------------------------------------------------------|----------------------------------------------------------------------|------------------------------------------------------------|--------------------------------------------------------------|
| <span style="color: blue;">■</span> American Samoa            | <span style="color: green;">■</span> Fiji                            | <span style="color: blue;">■</span> Montenegro             | <span style="color: green;">■</span> Seychelles              |
| <span style="color: teal;">■</span> Bahrain                   | <span style="color: blue;">■</span> French Polynesia                 | <span style="color: yellow-green;">■</span> Nauru          | <span style="color: orange-yellow;">■</span> Solomon Islands |
| <span style="color: teal;">■</span> Bermuda                   | <span style="color: green;">■</span> Kiribati                        | <span style="color: blue;">■</span> Niue                   | <span style="color: grey;">■</span> Tokelau                  |
| <span style="color: yellow-green;">■</span> Brunei Darussalam | <span style="color: yellow-green;">■</span> Maldives                 | <span style="color: green;">■</span> Palau                 | <span style="color: blue;">■</span> Tonga                    |
| <span style="color: teal;">■</span> Cape Verde                | <span style="color: yellow-green;">■</span> Marshall Islands         | <span style="color: green;">■</span> Samoa                 | <span style="color: teal;">■</span> Tuvalu                   |
| <span style="color: yellow-green;">■</span> Comoros           | <span style="color: blue;">■</span> Mauritius                        | <span style="color: green;">■</span> Sao Tome and Principe | <span style="color: yellow-green;">■</span> Vanuatu          |
| <span style="color: blue;">■</span> Cook Islands              | <span style="color: green;">■</span> Mirconesia, Federated States of |                                                            |                                                              |

Change 1990-2020 (girls, age 5, urban)

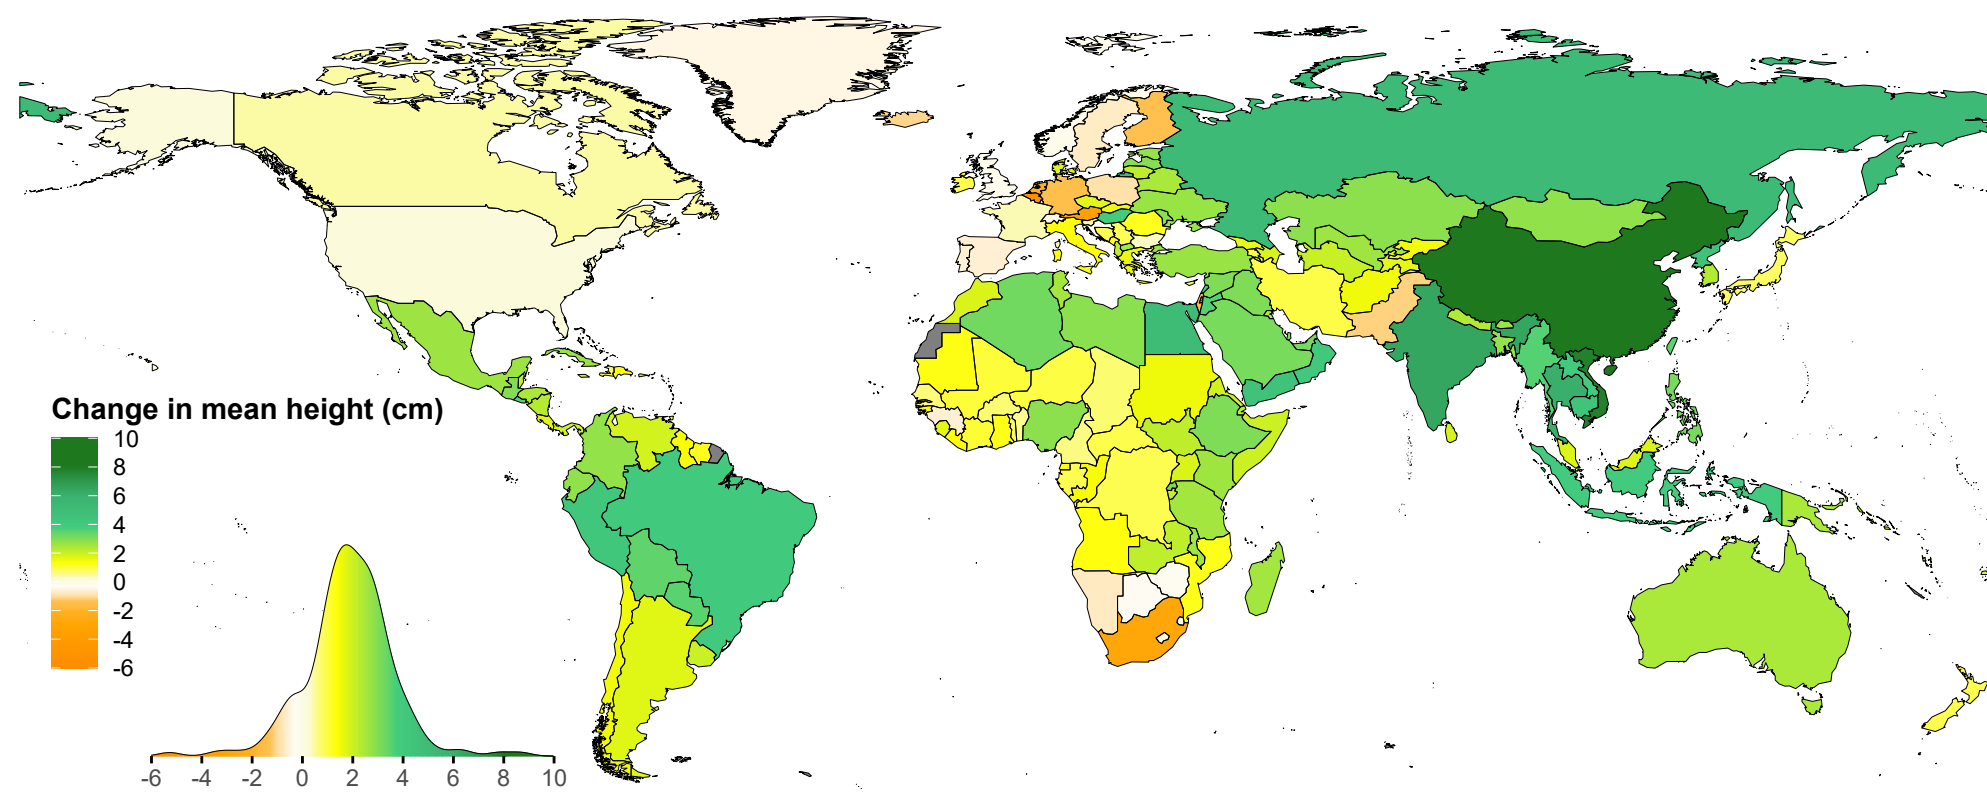

- |                                                            |                                                                      |                                                            |                                                             |
|------------------------------------------------------------|----------------------------------------------------------------------|------------------------------------------------------------|-------------------------------------------------------------|
| <span style="color: yellow-green;">■</span> American Samoa | <span style="color: yellow-green;">■</span> Fiji                     | <span style="color: yellow-green;">■</span> Montenegro     | <span style="color: green;">■</span> Seychelles             |
| <span style="color: teal;">■</span> Bahrain                | <span style="color: green;">■</span> French Polynesia                | <span style="color: yellow-green;">■</span> Nauru          | <span style="color: yellow-green;">■</span> Solomon Islands |
| <span style="color: teal;">■</span> Bermuda                | <span style="color: green;">■</span> Kiribati                        | <span style="color: yellow-green;">■</span> Niue           | <span style="color: grey;">■</span> Tokelau                 |
| <span style="color: green;">■</span> Brunei Darussalam     | <span style="color: green;">■</span> Maldives                        | <span style="color: green;">■</span> Palau                 | <span style="color: yellow-green;">■</span> Tonga           |
| <span style="color: green;">■</span> Cape Verde            | <span style="color: green;">■</span> Marshall Islands                | <span style="color: green;">■</span> Samoa                 | <span style="color: green;">■</span> Tuvalu                 |
| <span style="color: yellow-green;">■</span> Comoros        | <span style="color: green;">■</span> Mauritius                       | <span style="color: green;">■</span> Sao Tome and Principe | <span style="color: yellow-green;">■</span> Vanuatu         |
| <span style="color: green;">■</span> Cook Islands          | <span style="color: green;">■</span> Mirconesia, Federated States of |                                                            |                                                             |

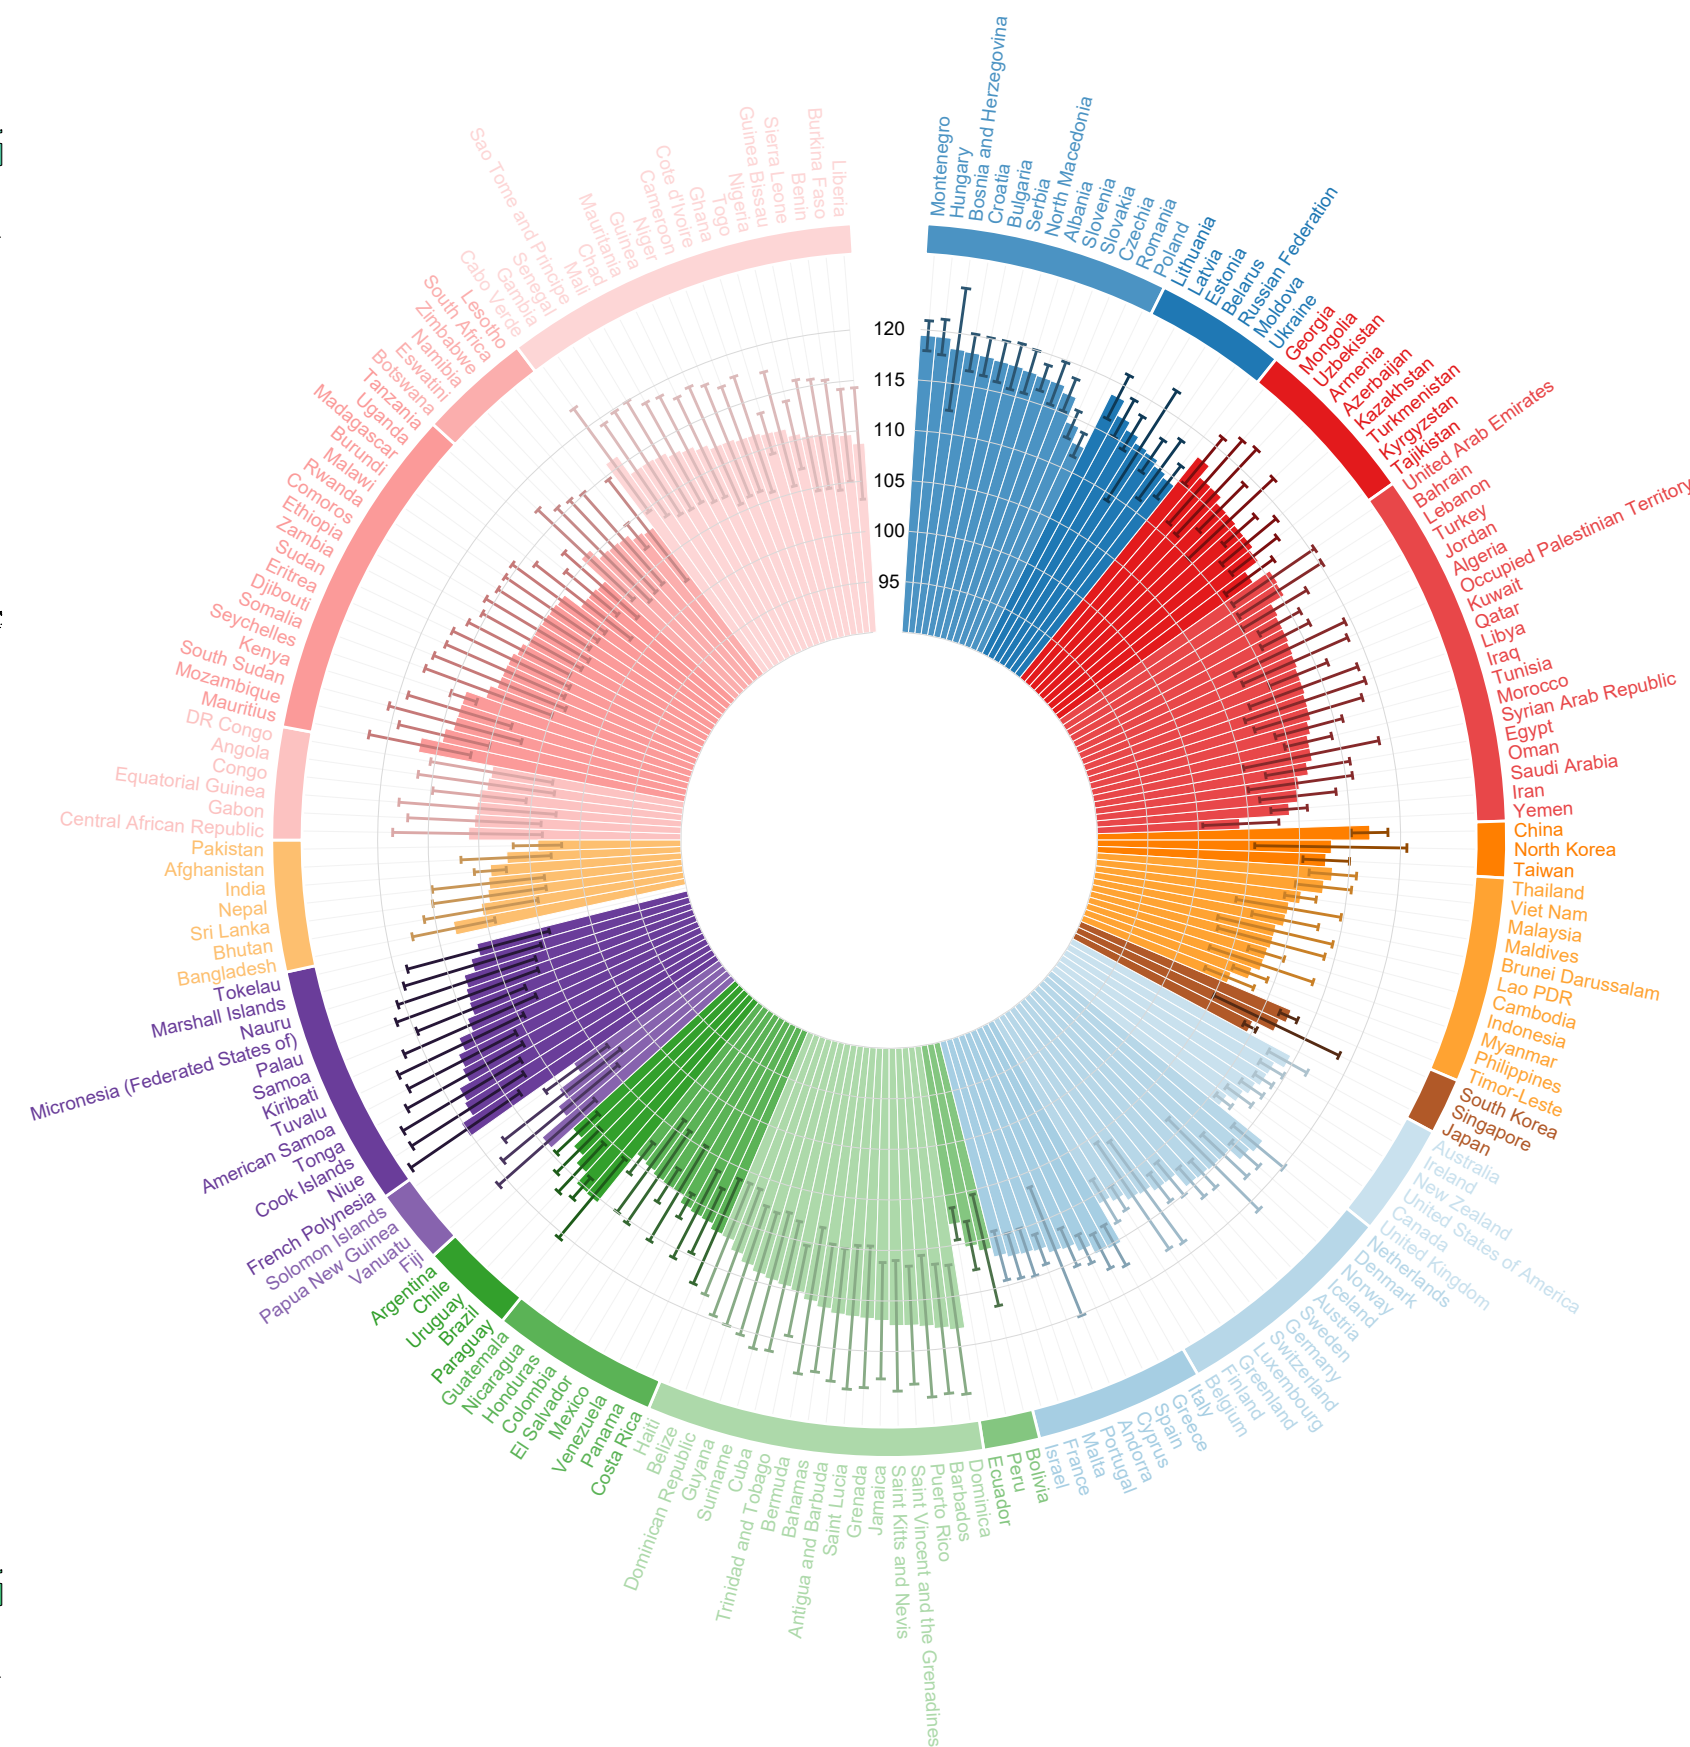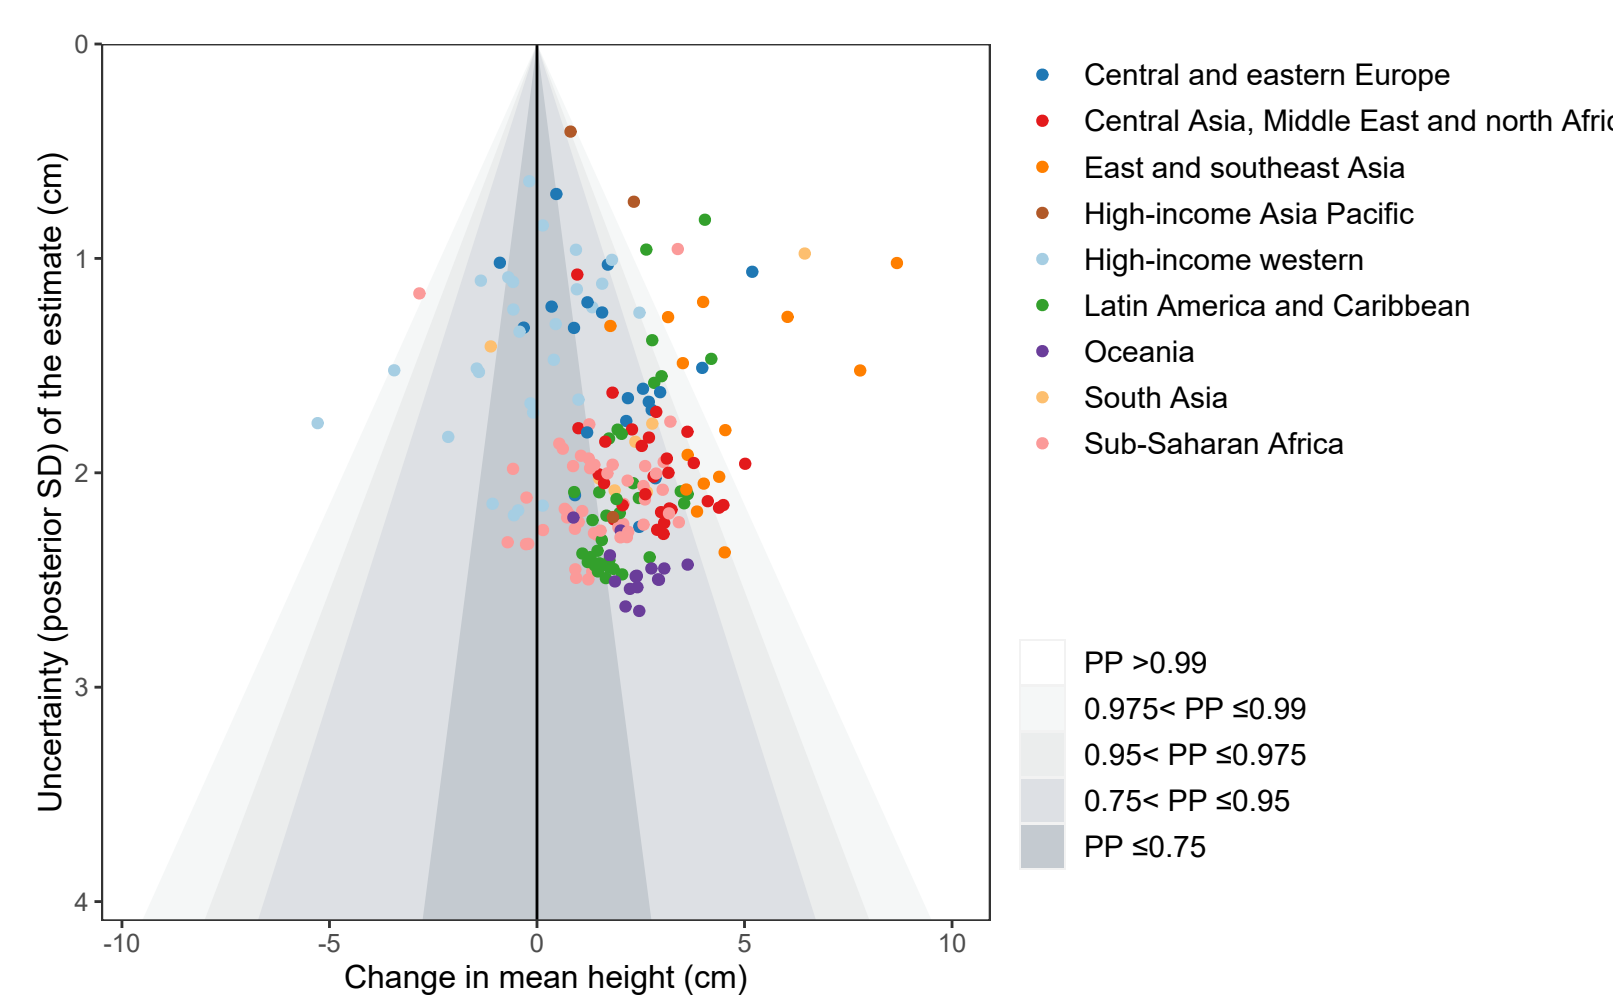



Mean height in 2020 (girls, age 5, rural)

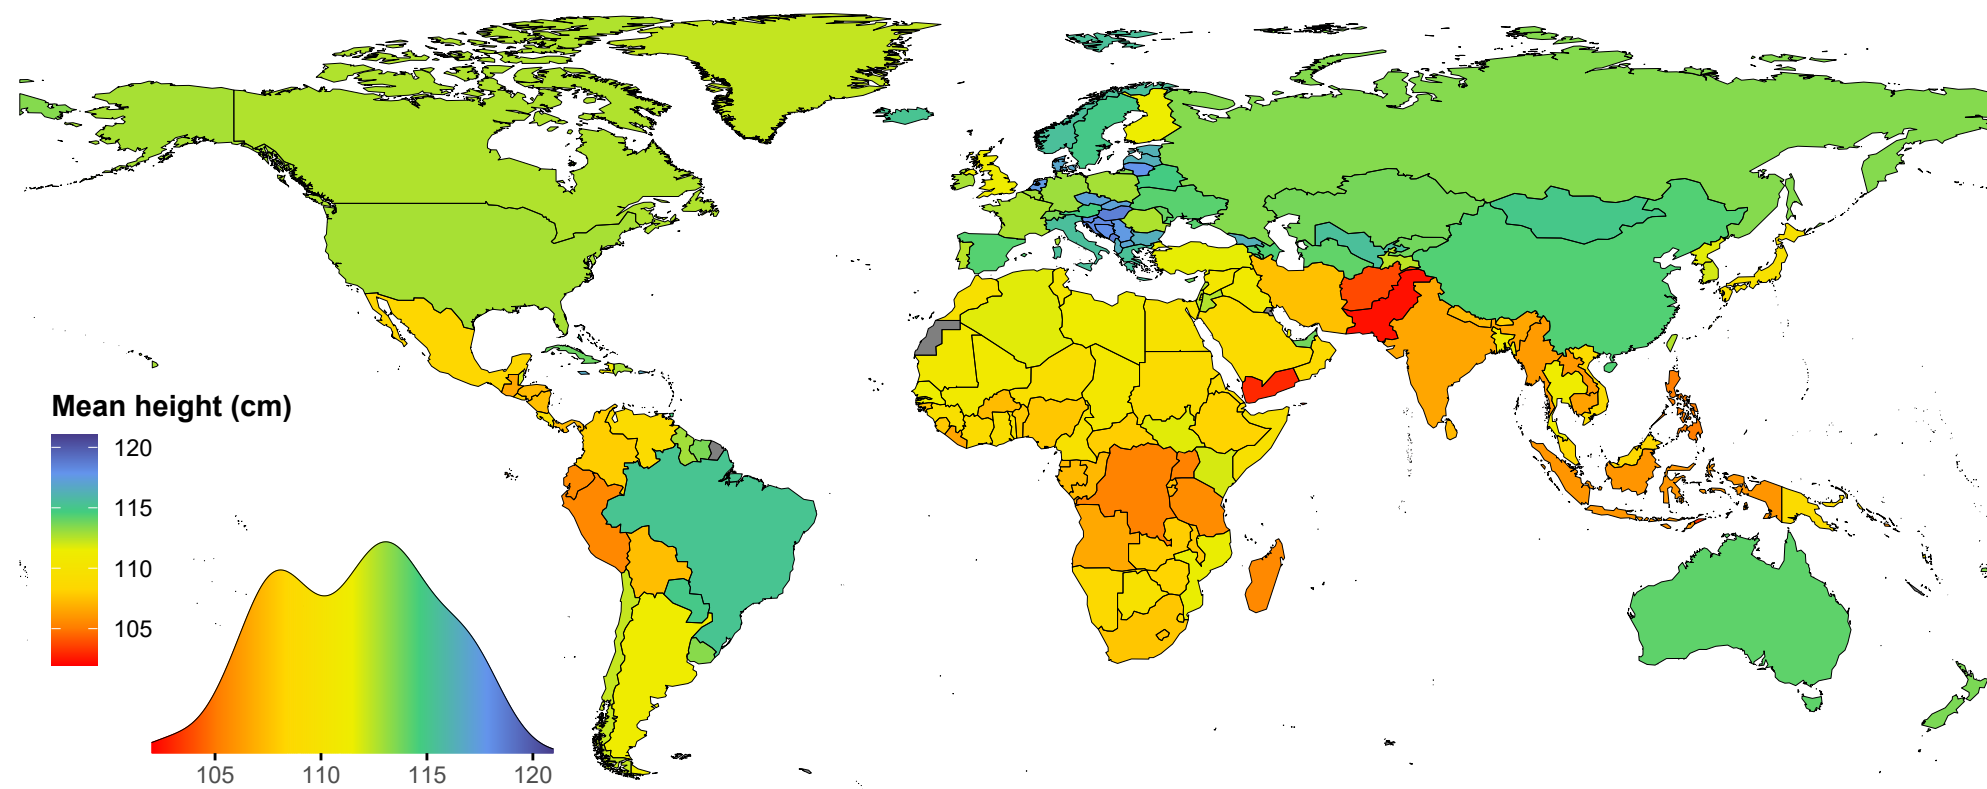

- |                   |                                 |                       |                 |
|-------------------|---------------------------------|-----------------------|-----------------|
| American Samoa    | Fiji                            | Montenegro            | Seychelles      |
| Bahrain           | French Polynesia                | Nauru                 | Solomon Islands |
| Bermuda           | Kiribati                        | Niue                  | Tokelau         |
| Brunei Darussalam | Maldives                        | Palau                 | Tonga           |
| Cape Verde        | Marshall Islands                | Samoa                 | Tuvalu          |
| Comoros           | Mauritius                       | Sao Tome and Principe | Vanuatu         |
| Cook Islands      | Mirconesia, Federated States of |                       |                 |

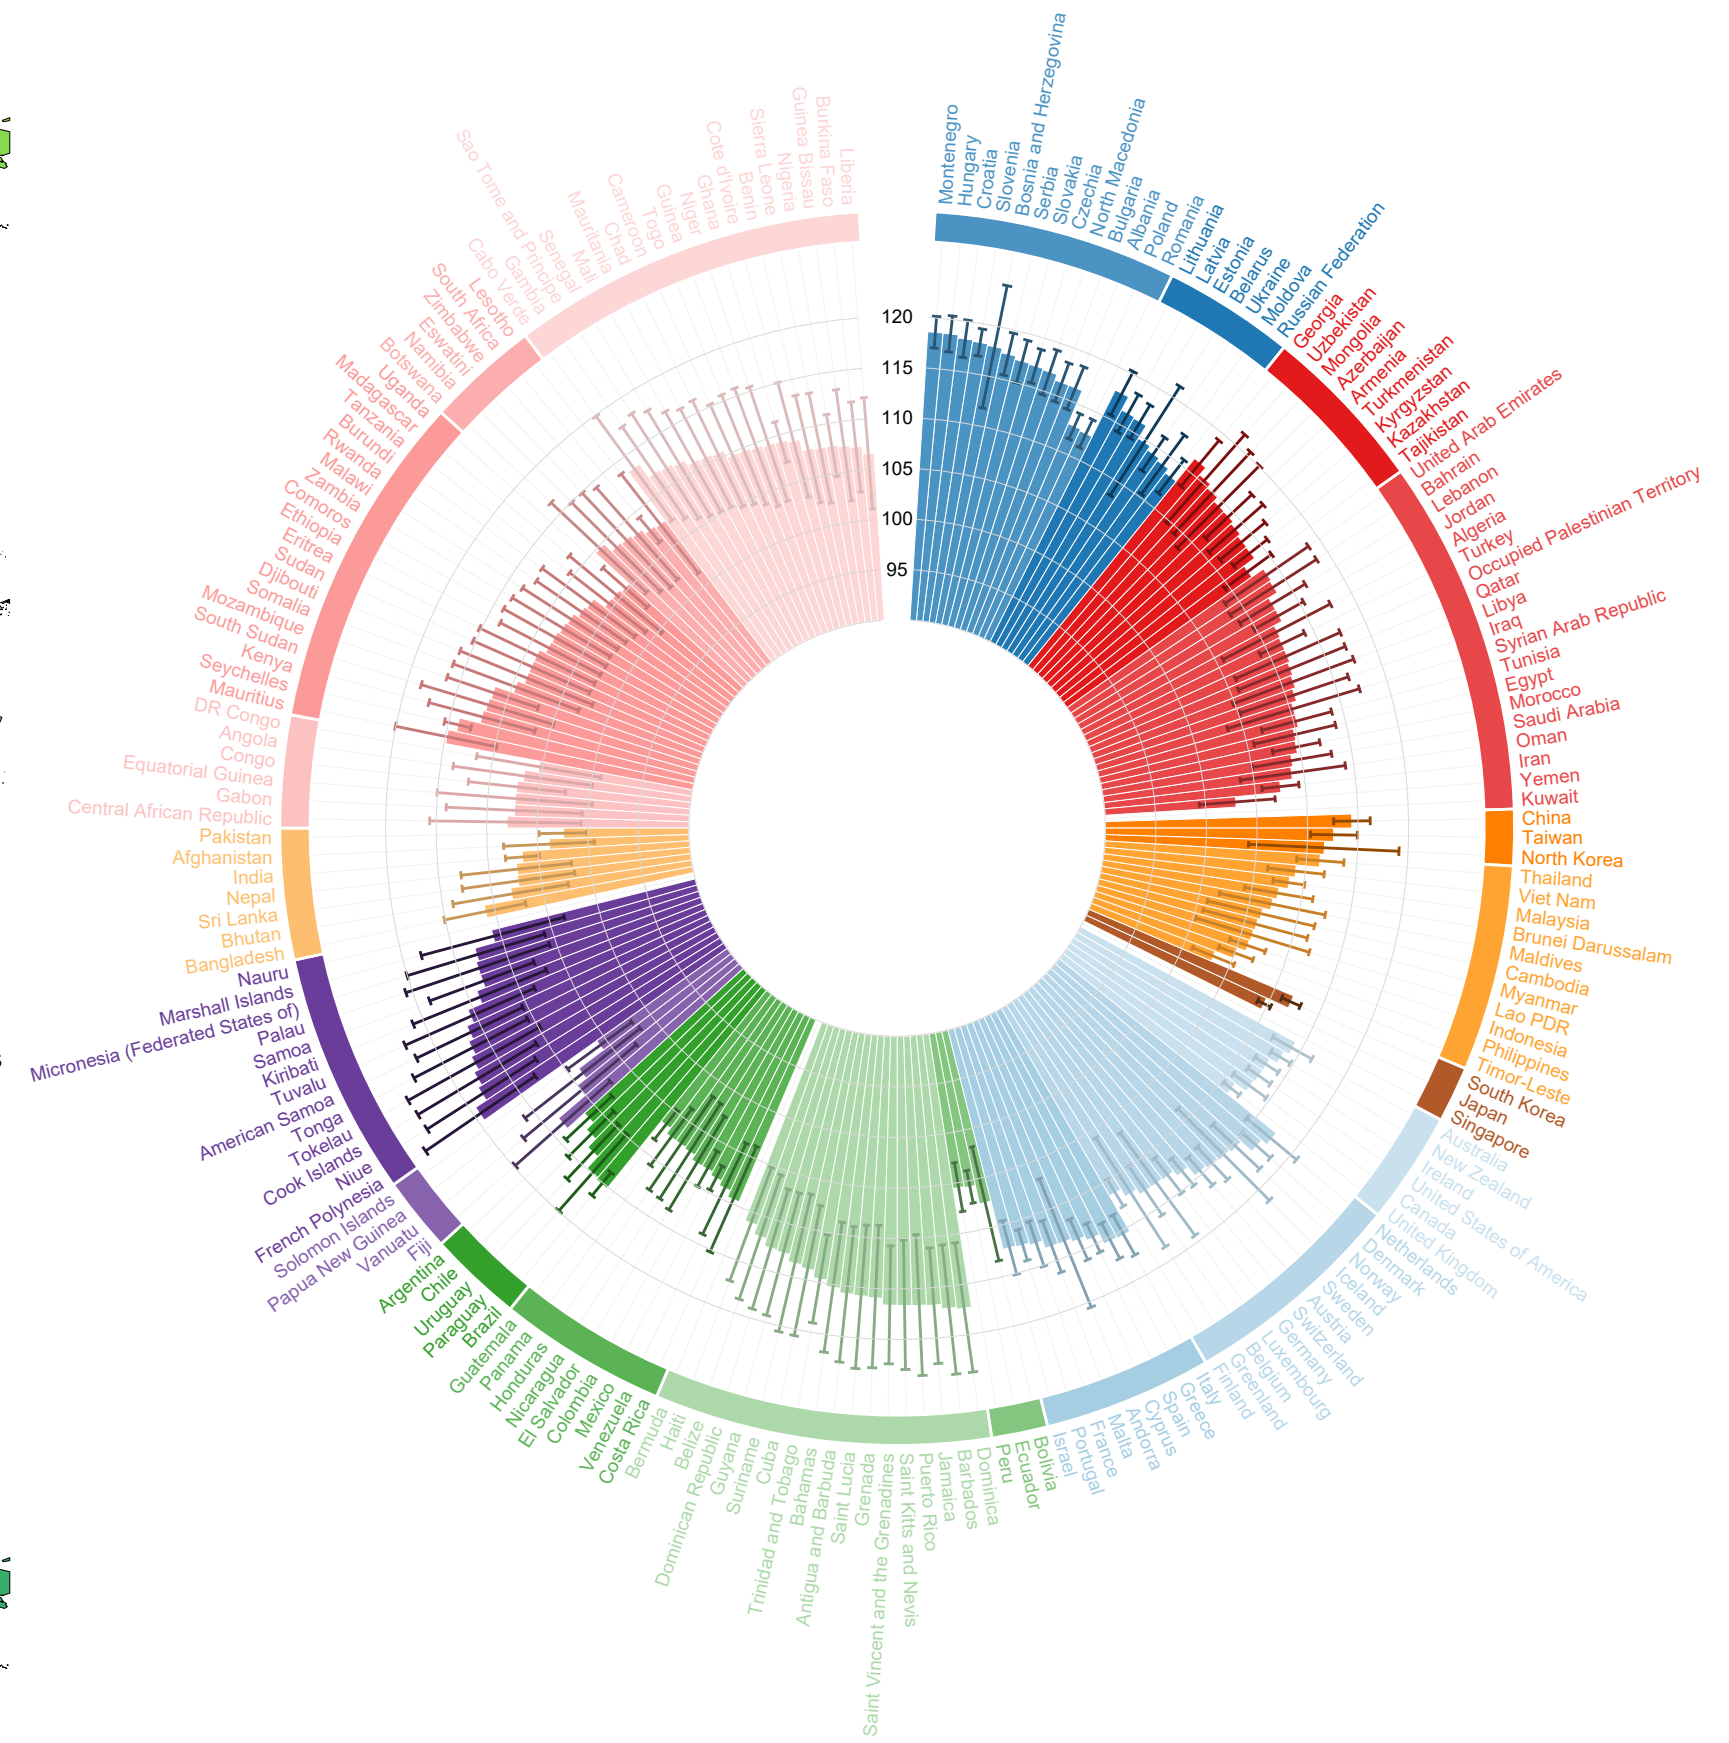

Change 1990-2020 (girls, age 5, rural)

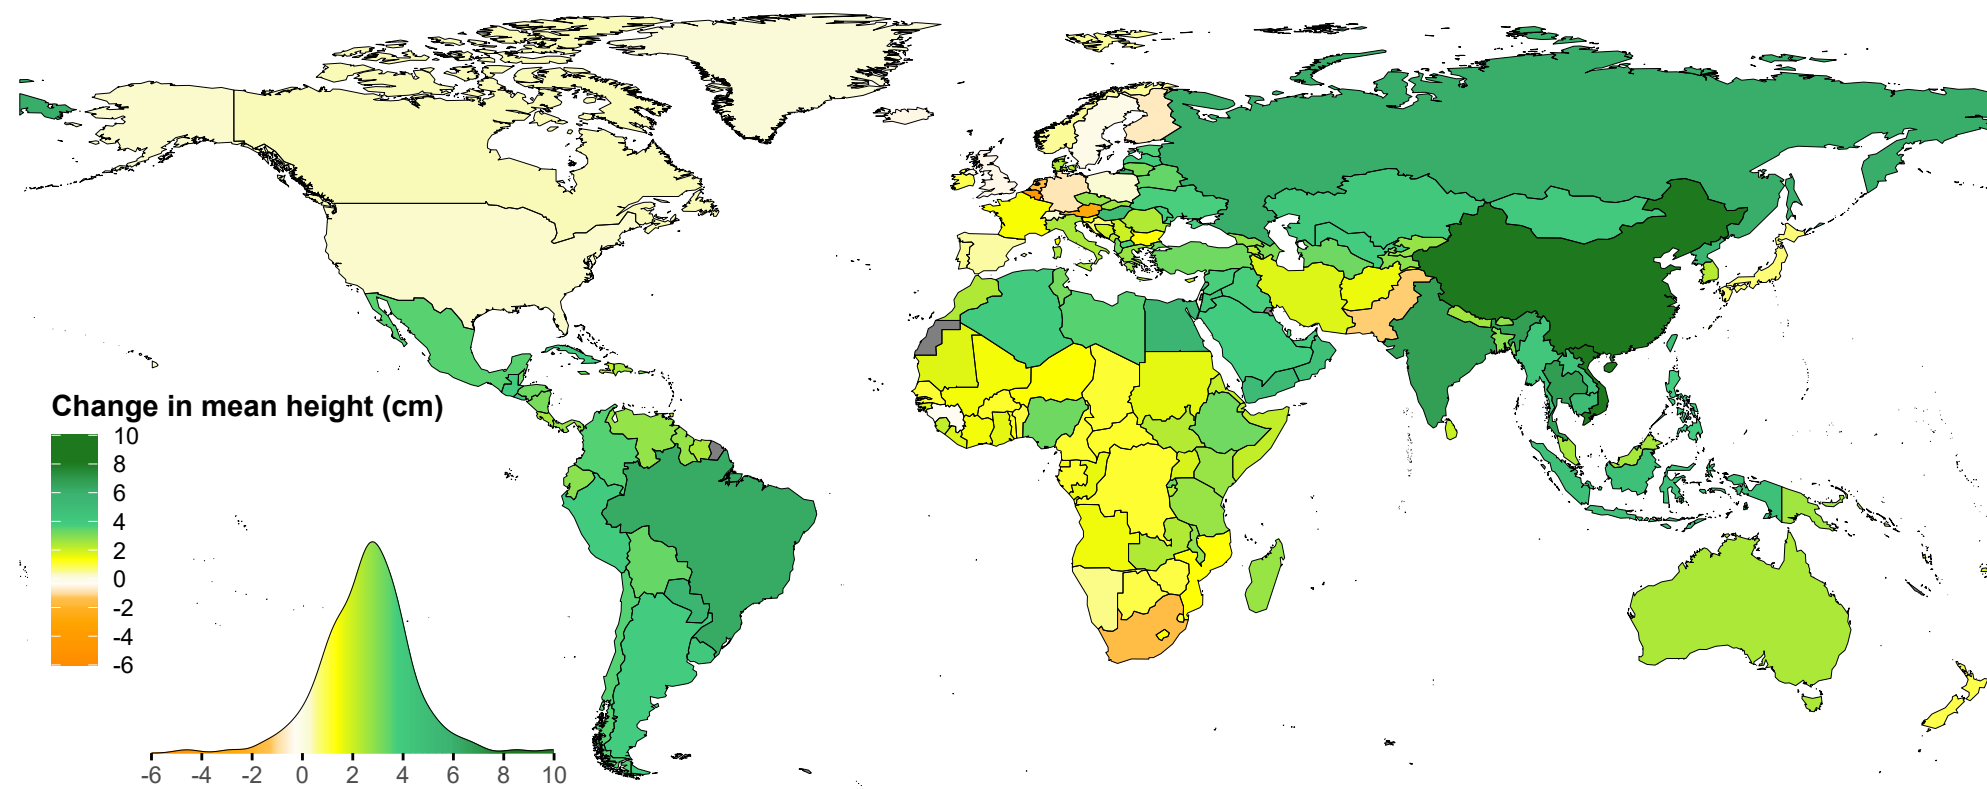

- |                   |                                 |                       |                 |
|-------------------|---------------------------------|-----------------------|-----------------|
| American Samoa    | Fiji                            | Montenegro            | Seychelles      |
| Bahrain           | French Polynesia                | Nauru                 | Solomon Islands |
| Bermuda           | Kiribati                        | Niue                  | Tokelau         |
| Brunei Darussalam | Maldives                        | Palau                 | Tonga           |
| Cape Verde        | Marshall Islands                | Samoa                 | Tuvalu          |
| Comoros           | Mauritius                       | Sao Tome and Principe | Vanuatu         |
| Cook Islands      | Mirconesia, Federated States of |                       |                 |

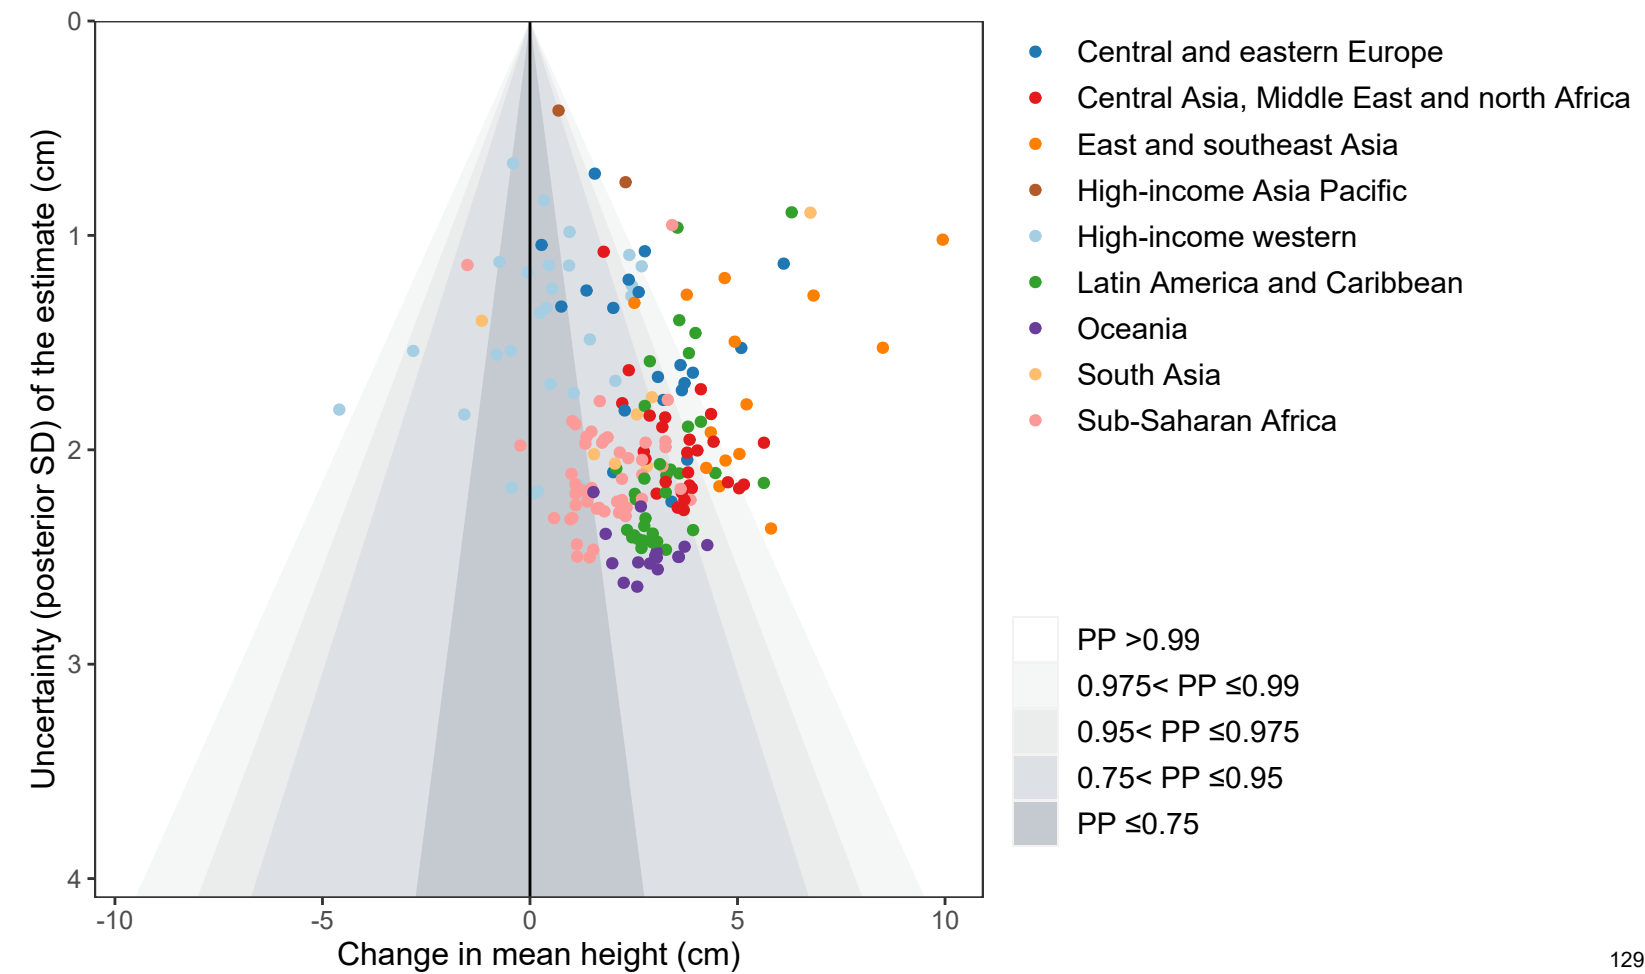



Mean height in 2020 (boys, age 5, urban)

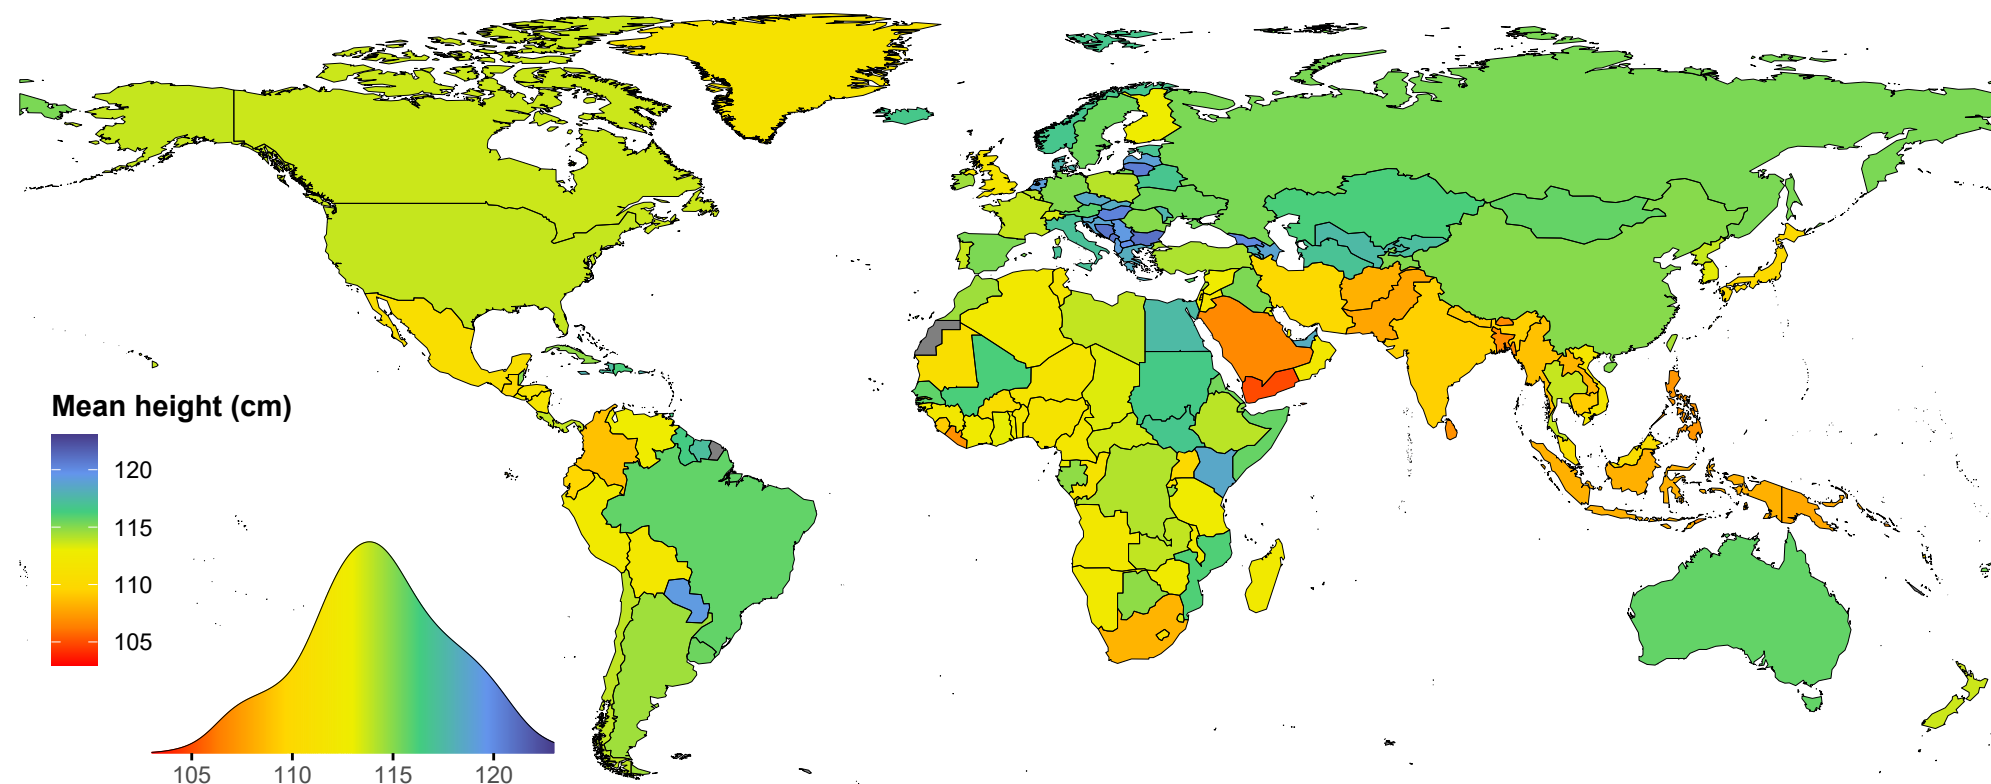

- |                                                          |                                                                        |                                                              |                                                        |
|----------------------------------------------------------|------------------------------------------------------------------------|--------------------------------------------------------------|--------------------------------------------------------|
| <span style="color: #4682B4;">■</span> American Samoa    | <span style="color: #90EE90;">■</span> Fiji                            | <span style="color: #4169E1;">■</span> Montenegro            | <span style="color: #90EE90;">■</span> Seychelles      |
| <span style="color: #FFFF00;">■</span> Bahrain           | <span style="color: #483D8B;">■</span> French Polynesia                | <span style="color: #FFFF00;">■</span> Nauru                 | <span style="color: #FF8C00;">■</span> Solomon Islands |
| <span style="color: #4682B4;">■</span> Bermuda           | <span style="color: #90EE90;">■</span> Kiribati                        | <span style="color: #4169E1;">■</span> Niue                  | <span style="color: #808080;">■</span> Tokelau         |
| <span style="color: #FFFF00;">■</span> Brunei Darussalam | <span style="color: #FFFF00;">■</span> Maldives                        | <span style="color: #90EE90;">■</span> Palau                 | <span style="color: #4682B4;">■</span> Tonga           |
| <span style="color: #90EE90;">■</span> Cape Verde        | <span style="color: #FF8C00;">■</span> Marshall Islands                | <span style="color: #FFFF00;">■</span> Samoa                 | <span style="color: #90EE90;">■</span> Tuvalu          |
| <span style="color: #90EE90;">■</span> Comoros           | <span style="color: #483D8B;">■</span> Mauritius                       | <span style="color: #FFFF00;">■</span> Sao Tome and Principe | <span style="color: #FFD700;">■</span> Vanuatu         |
| <span style="color: #4682B4;">■</span> Cook Islands      | <span style="color: #90EE90;">■</span> Mirconesia, Federated States of |                                                              |                                                        |

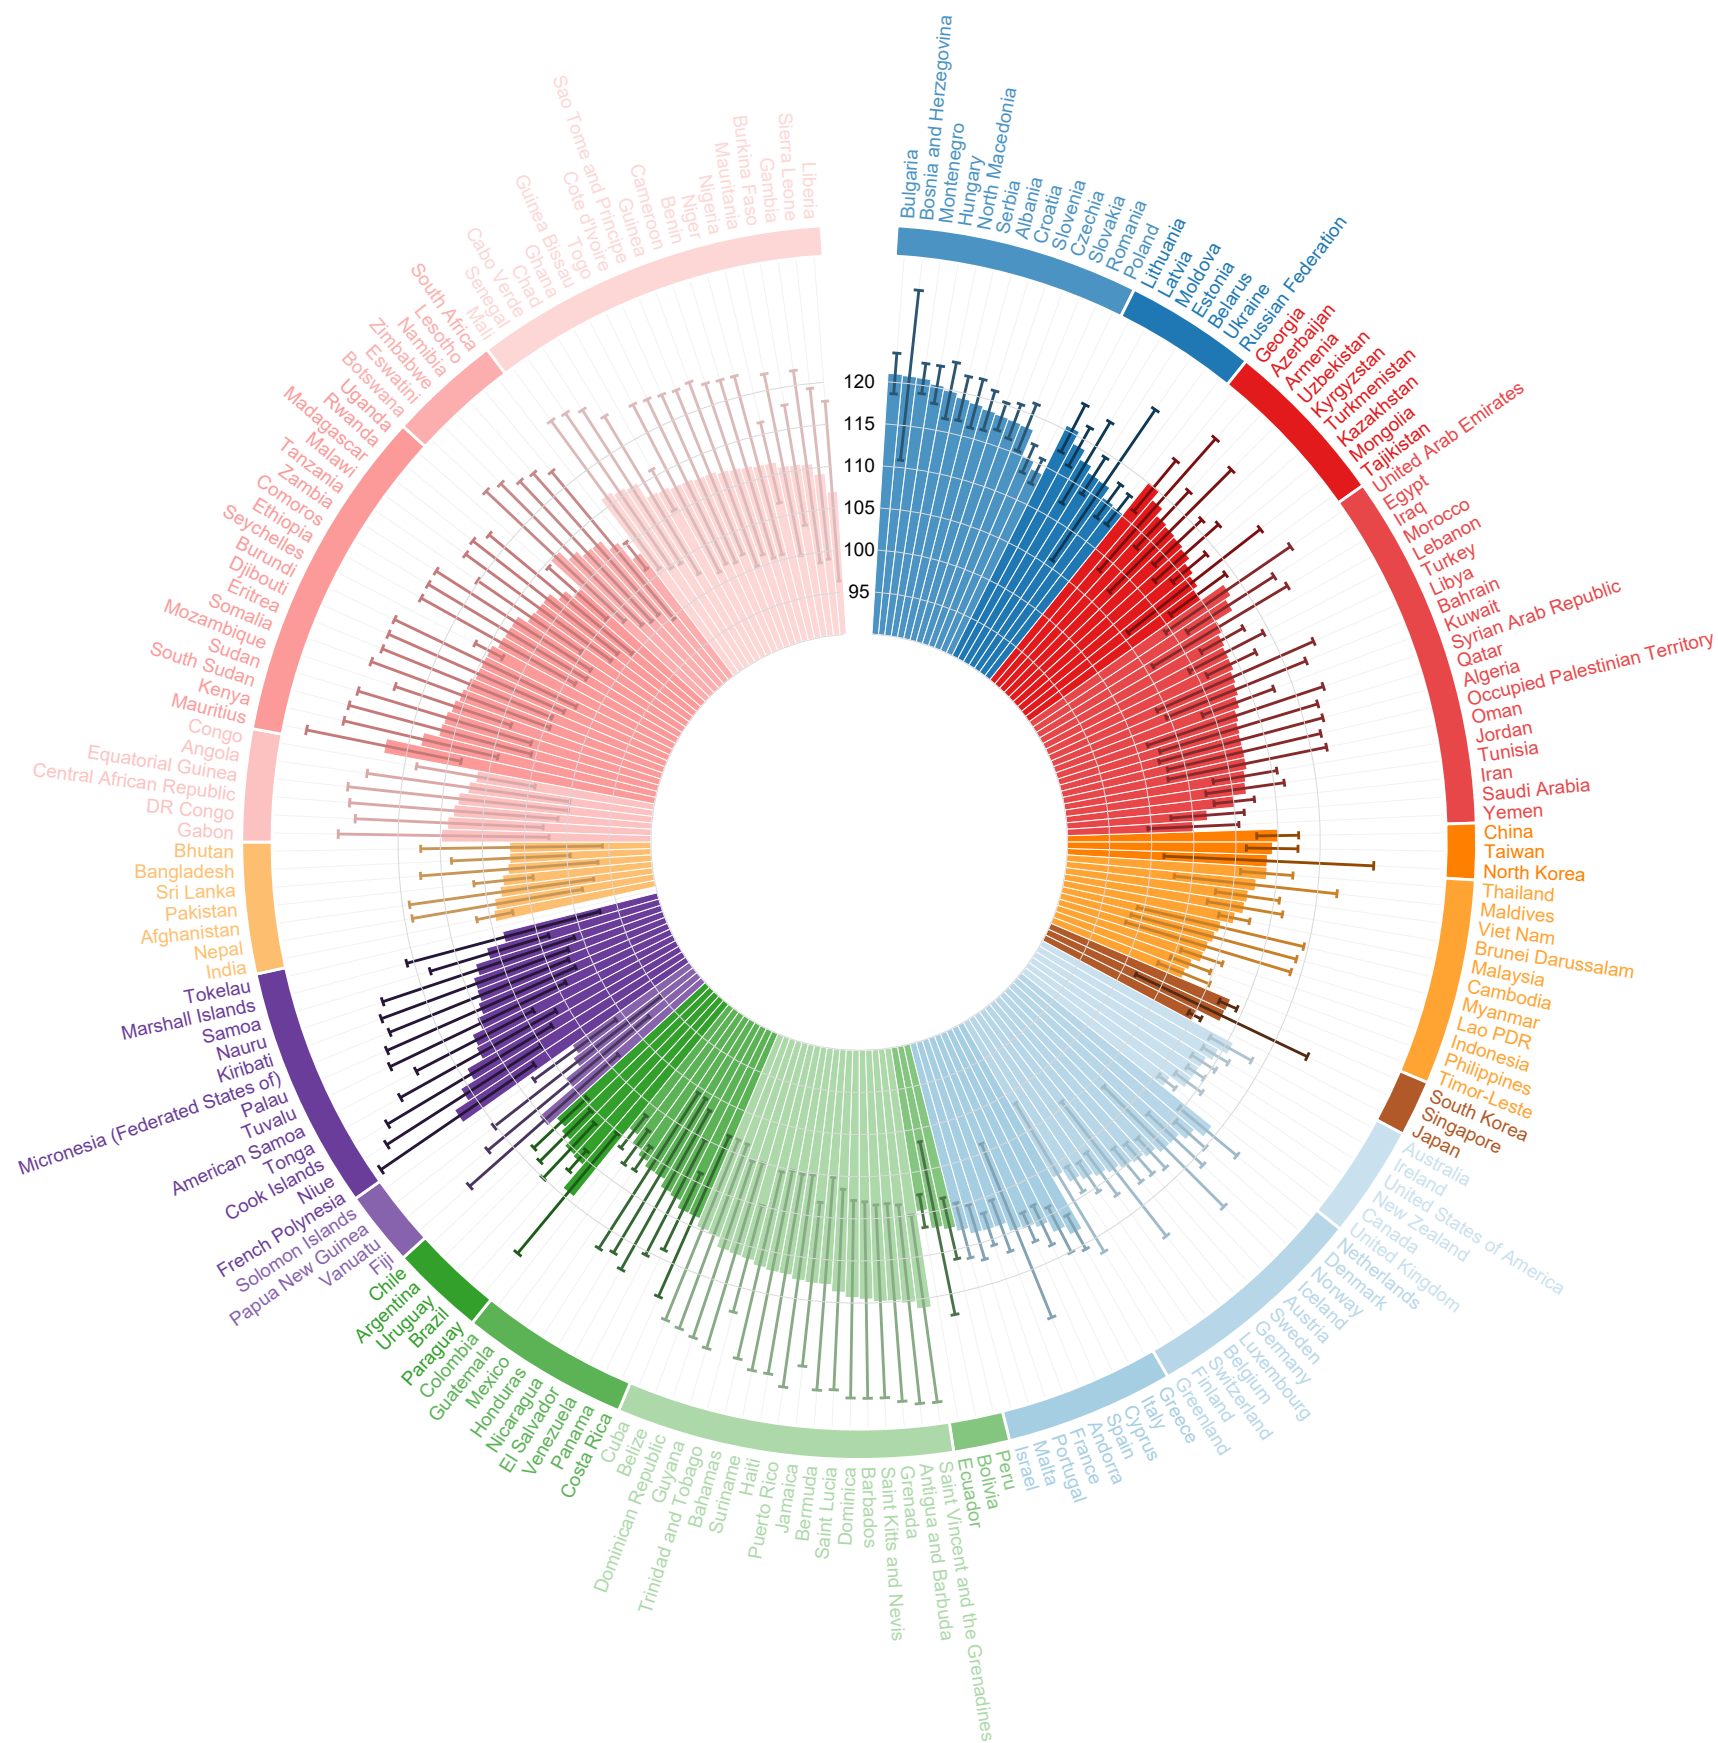

Change 1990-2020 (boys, age 5, urban)

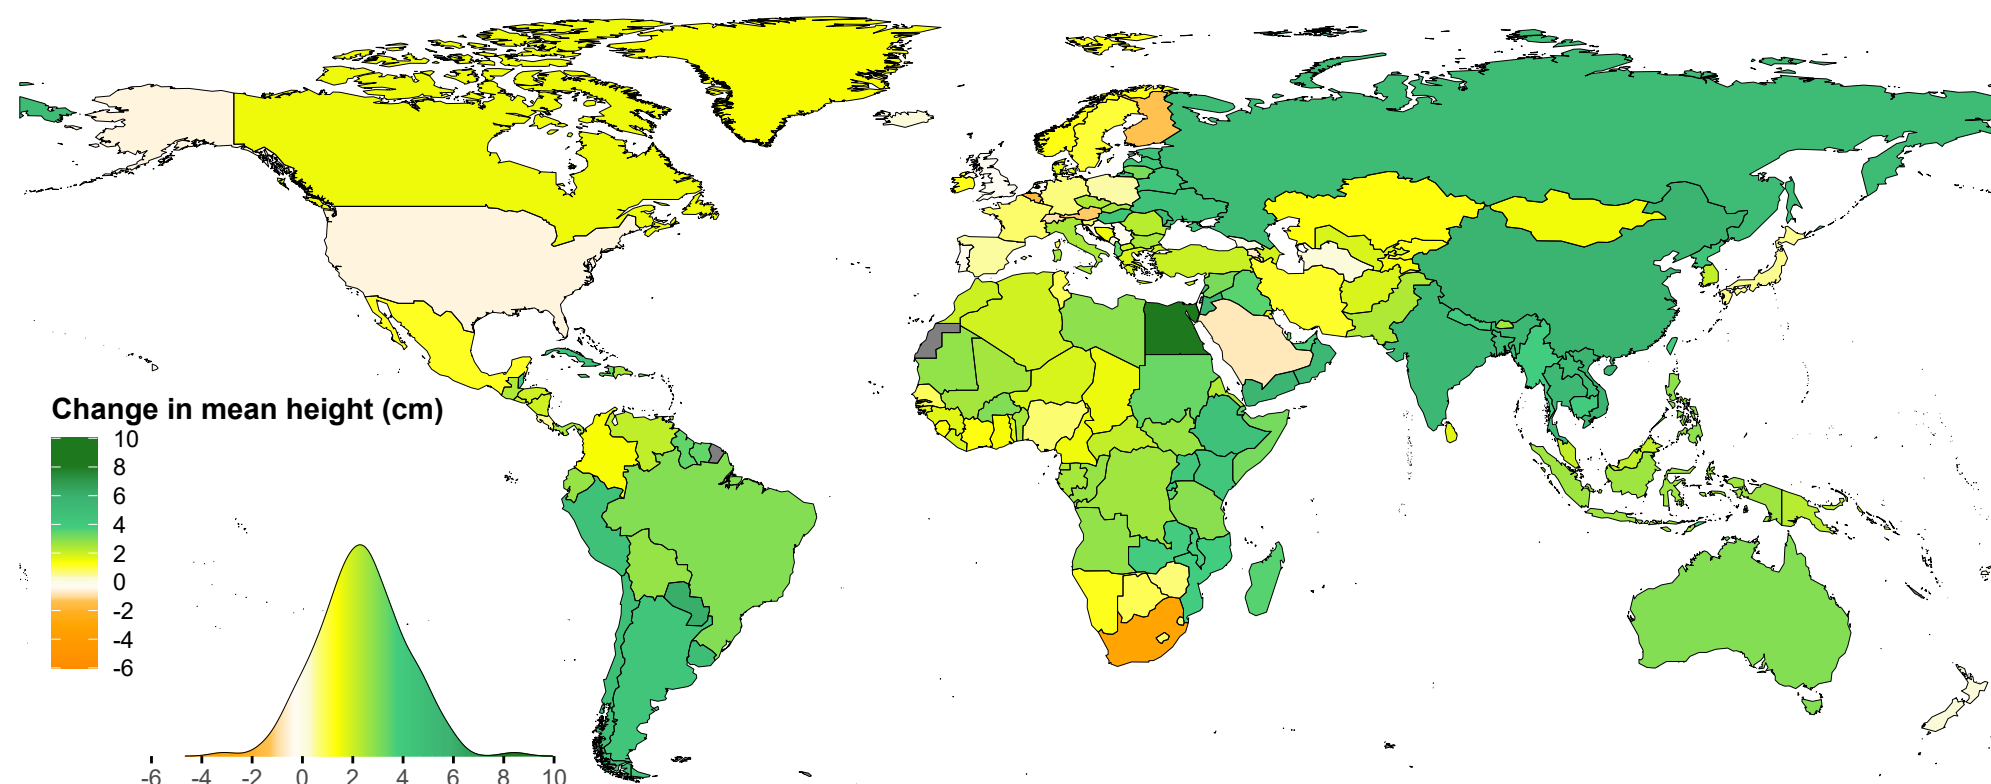

- |                                                          |                                                                        |                                                              |                                                        |
|----------------------------------------------------------|------------------------------------------------------------------------|--------------------------------------------------------------|--------------------------------------------------------|
| <span style="color: #FFFF00;">■</span> American Samoa    | <span style="color: #F5DEB3;">■</span> Fiji                            | <span style="color: #F5DEB3;">■</span> Montenegro            | <span style="color: #4682B4;">■</span> Seychelles      |
| <span style="color: #90EE90;">■</span> Bahrain           | <span style="color: #FFFF00;">■</span> French Polynesia                | <span style="color: #FFFF00;">■</span> Nauru                 | <span style="color: #FFFF00;">■</span> Solomon Islands |
| <span style="color: #4682B4;">■</span> Bermuda           | <span style="color: #90EE90;">■</span> Kiribati                        | <span style="color: #FFFF00;">■</span> Niue                  | <span style="color: #808080;">■</span> Tokelau         |
| <span style="color: #4682B4;">■</span> Brunei Darussalam | <span style="color: #90EE90;">■</span> Maldives                        | <span style="color: #90EE90;">■</span> Palau                 | <span style="color: #4682B4;">■</span> Tonga           |
| <span style="color: #4682B4;">■</span> Cape Verde        | <span style="color: #4682B4;">■</span> Marshall Islands                | <span style="color: #F5DEB3;">■</span> Samoa                 | <span style="color: #FFFF00;">■</span> Tuvalu          |
| <span style="color: #4682B4;">■</span> Comoros           | <span style="color: #4682B4;">■</span> Mauritius                       | <span style="color: #90EE90;">■</span> Sao Tome and Principe | <span style="color: #F5DEB3;">■</span> Vanuatu         |
| <span style="color: #F5DEB3;">■</span> Cook Islands      | <span style="color: #90EE90;">■</span> Mirconesia, Federated States of |                                                              |                                                        |

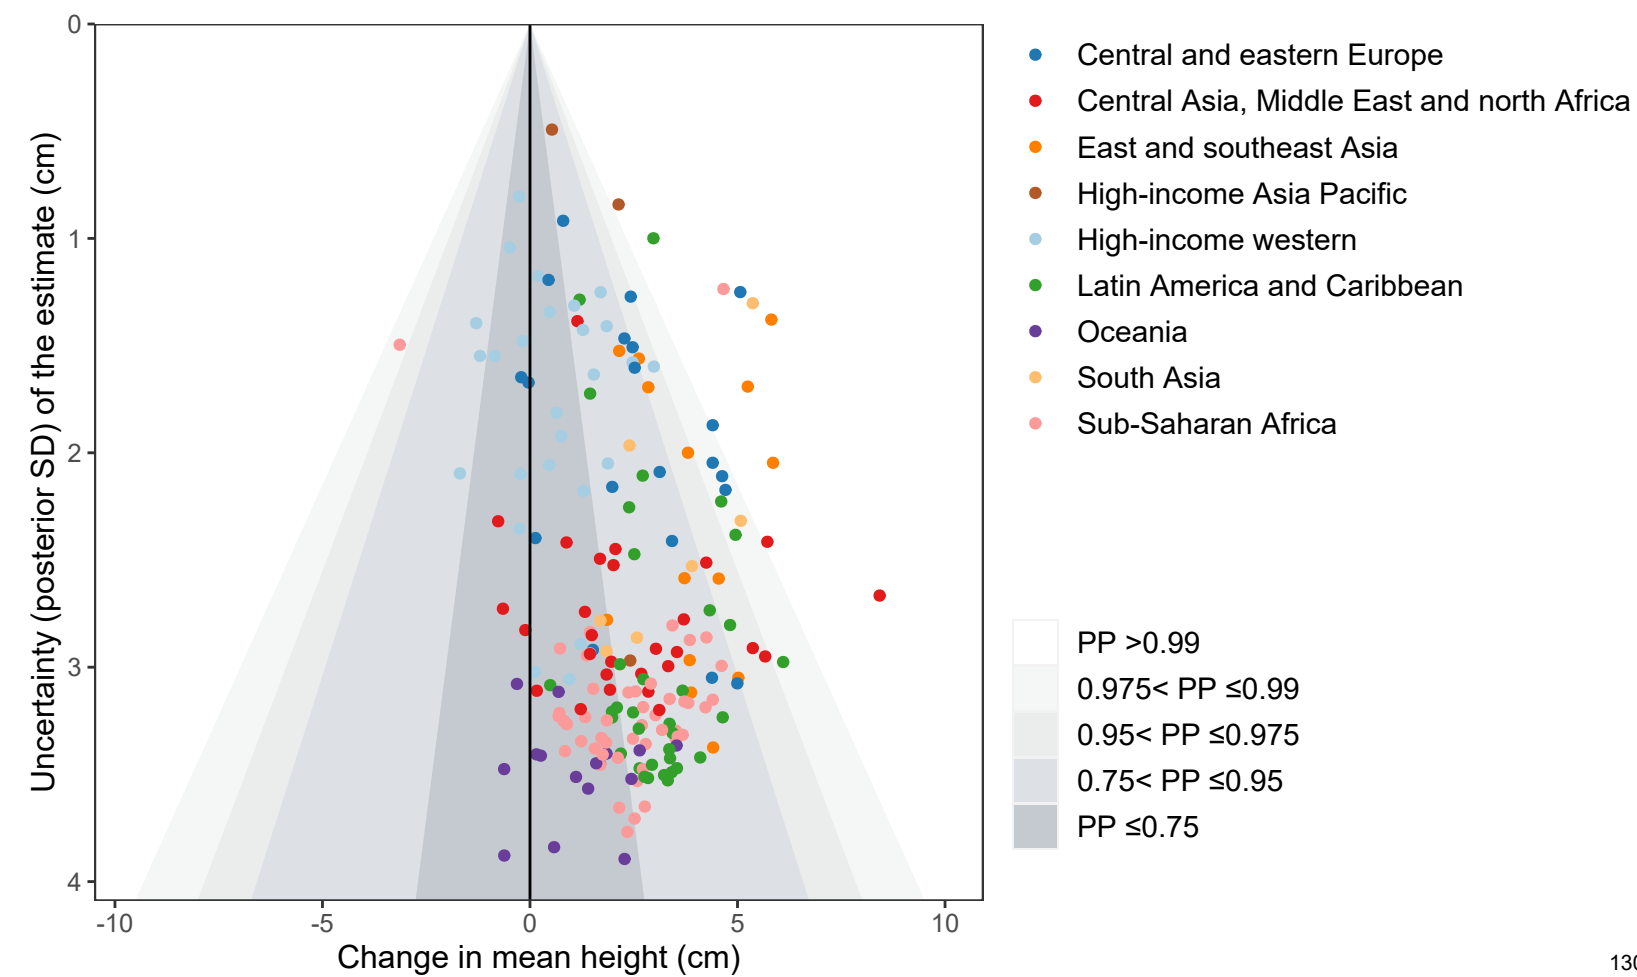



Mean height in 2020 (boys, age 5, rural)

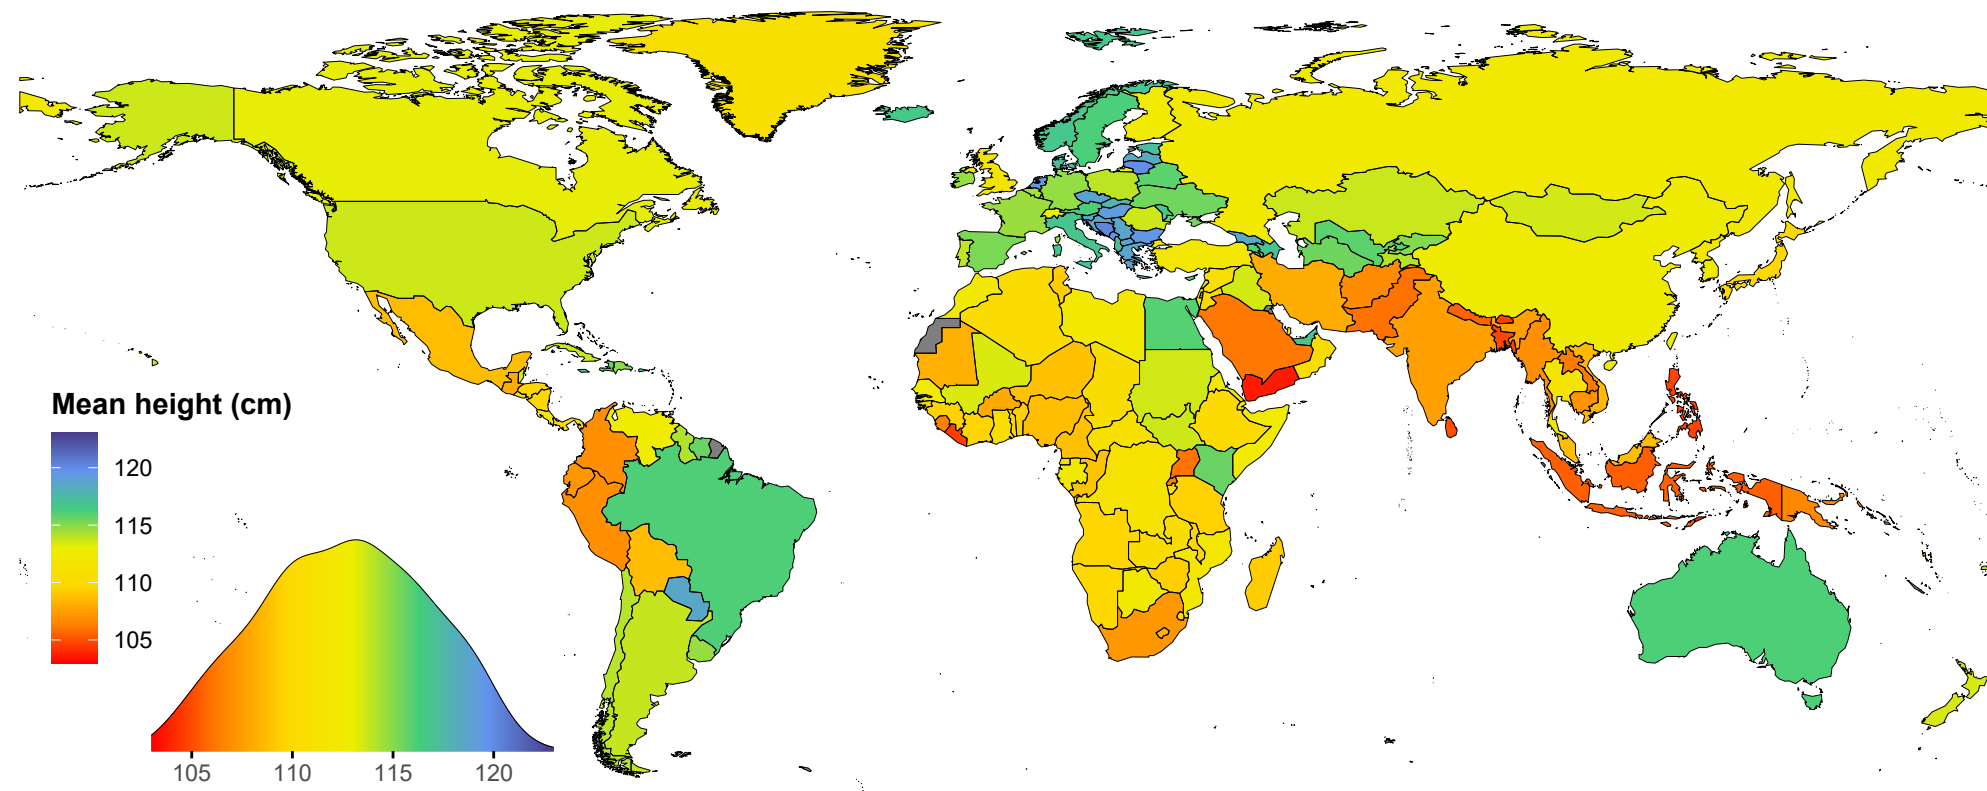

- |                                                         |                                                                       |                                                             |                                                       |
|---------------------------------------------------------|-----------------------------------------------------------------------|-------------------------------------------------------------|-------------------------------------------------------|
| <span style="color: green;">■</span> American Samoa     | <span style="color: lightgreen;">■</span> Fiji                        | <span style="color: blue;">■</span> Montenegro              | <span style="color: lightgreen;">■</span> Seychelles  |
| <span style="color: yellow;">■</span> Bahrain           | <span style="color: darkblue;">■</span> French Polynesia              | <span style="color: grey;">■</span> Nauru                   | <span style="color: orange;">■</span> Solomon Islands |
| <span style="color: grey;">■</span> Bermuda             | <span style="color: yellow;">■</span> Kiribati                        | <span style="color: blue;">■</span> Niue                    | <span style="color: teal;">■</span> Tokelau           |
| <span style="color: yellow;">■</span> Brunei Darussalam | <span style="color: yellow;">■</span> Maldives                        | <span style="color: yellow;">■</span> Palau                 | <span style="color: green;">■</span> Tonga            |
| <span style="color: yellow;">■</span> Cape Verde        | <span style="color: orange;">■</span> Marshall Islands                | <span style="color: yellow;">■</span> Samoa                 | <span style="color: lightgreen;">■</span> Tuvalu      |
| <span style="color: yellow;">■</span> Comoros           | <span style="color: blue;">■</span> Mauritius                         | <span style="color: yellow;">■</span> Sao Tome and Principe | <span style="color: orange;">■</span> Vanuatu         |
| <span style="color: teal;">■</span> Cook Islands        | <span style="color: yellow;">■</span> Mirconesia, Federated States of |                                                             |                                                       |

Change 1990-2020 (boys, age 5, rural)

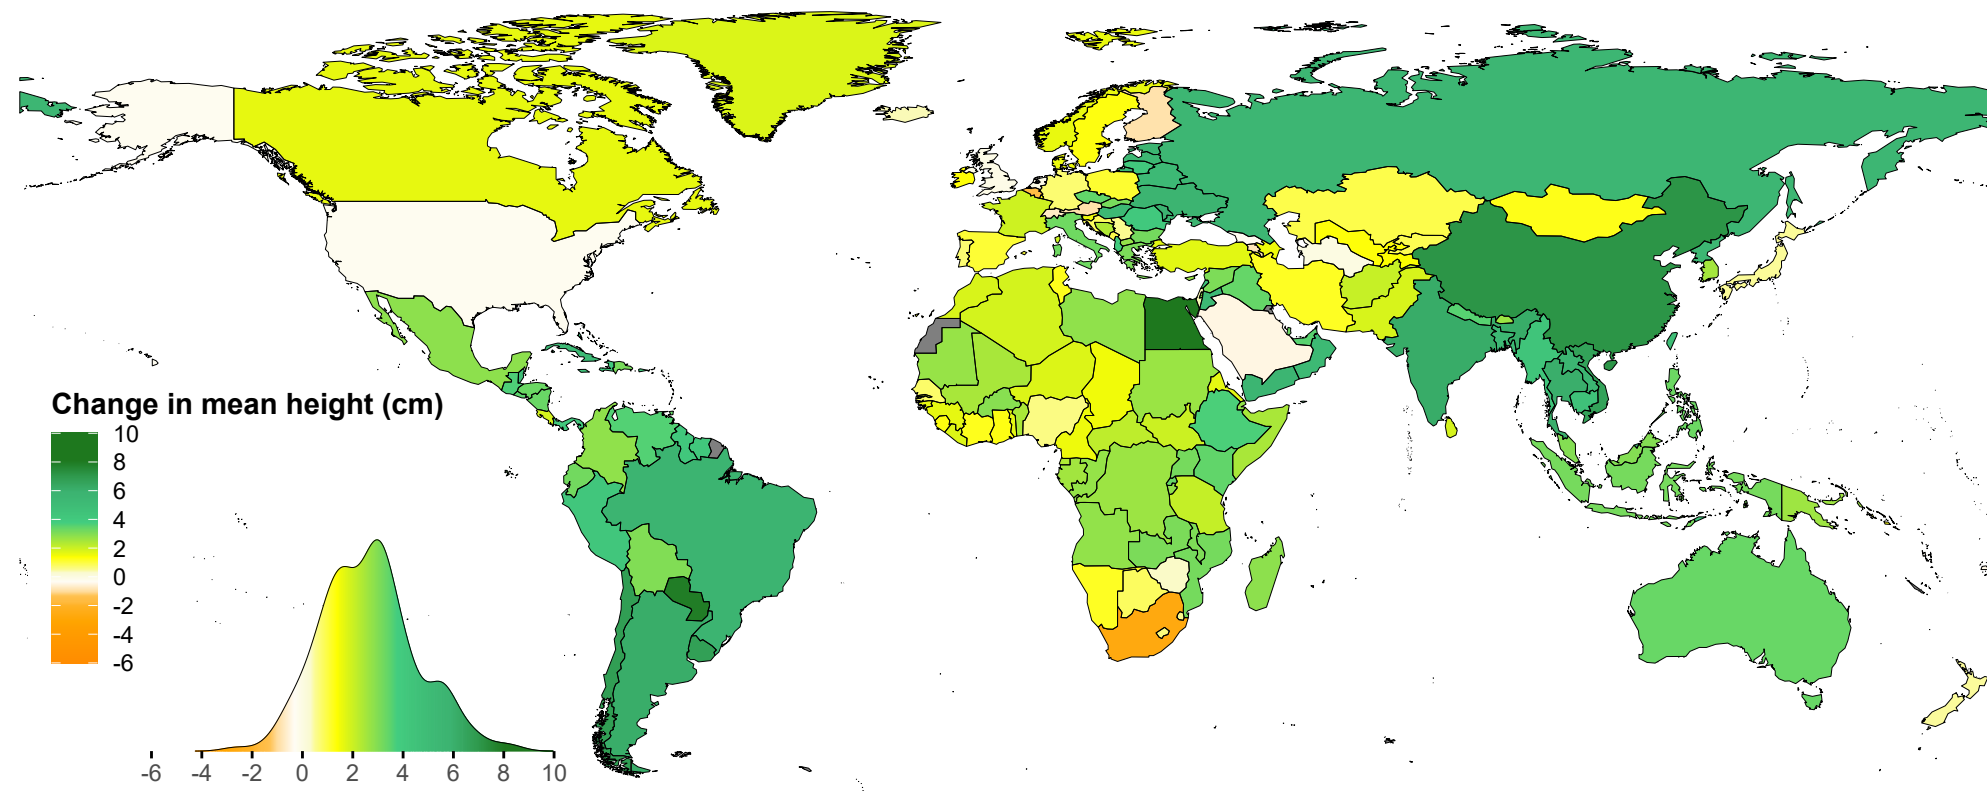

- |                                                        |                                                                           |                                                            |                                                       |
|--------------------------------------------------------|---------------------------------------------------------------------------|------------------------------------------------------------|-------------------------------------------------------|
| <span style="color: yellow;">■</span> American Samoa   | <span style="color: lightgrey;">■</span> Fiji                             | <span style="color: yellow;">■</span> Montenegro           | <span style="color: teal;">■</span> Seychelles        |
| <span style="color: lightgreen;">■</span> Bahrain      | <span style="color: yellow;">■</span> French Polynesia                    | <span style="color: grey;">■</span> Nauru                  | <span style="color: yellow;">■</span> Solomon Islands |
| <span style="color: grey;">■</span> Bermuda            | <span style="color: yellow;">■</span> Kiribati                            | <span style="color: lightgrey;">■</span> Niue              | <span style="color: lightgrey;">■</span> Tokelau      |
| <span style="color: green;">■</span> Brunei Darussalam | <span style="color: lightgreen;">■</span> Maldives                        | <span style="color: lightgreen;">■</span> Palau            | <span style="color: lightgrey;">■</span> Tonga        |
| <span style="color: yellow;">■</span> Cape Verde       | <span style="color: green;">■</span> Marshall Islands                     | <span style="color: lightgrey;">■</span> Samoa             | <span style="color: yellow;">■</span> Tuvalu          |
| <span style="color: green;">■</span> Comoros           | <span style="color: green;">■</span> Mauritius                            | <span style="color: green;">■</span> Sao Tome and Principe | <span style="color: lightgrey;">■</span> Vanuatu      |
| <span style="color: lightgrey;">■</span> Cook Islands  | <span style="color: lightgreen;">■</span> Mirconesia, Federated States of |                                                            |                                                       |

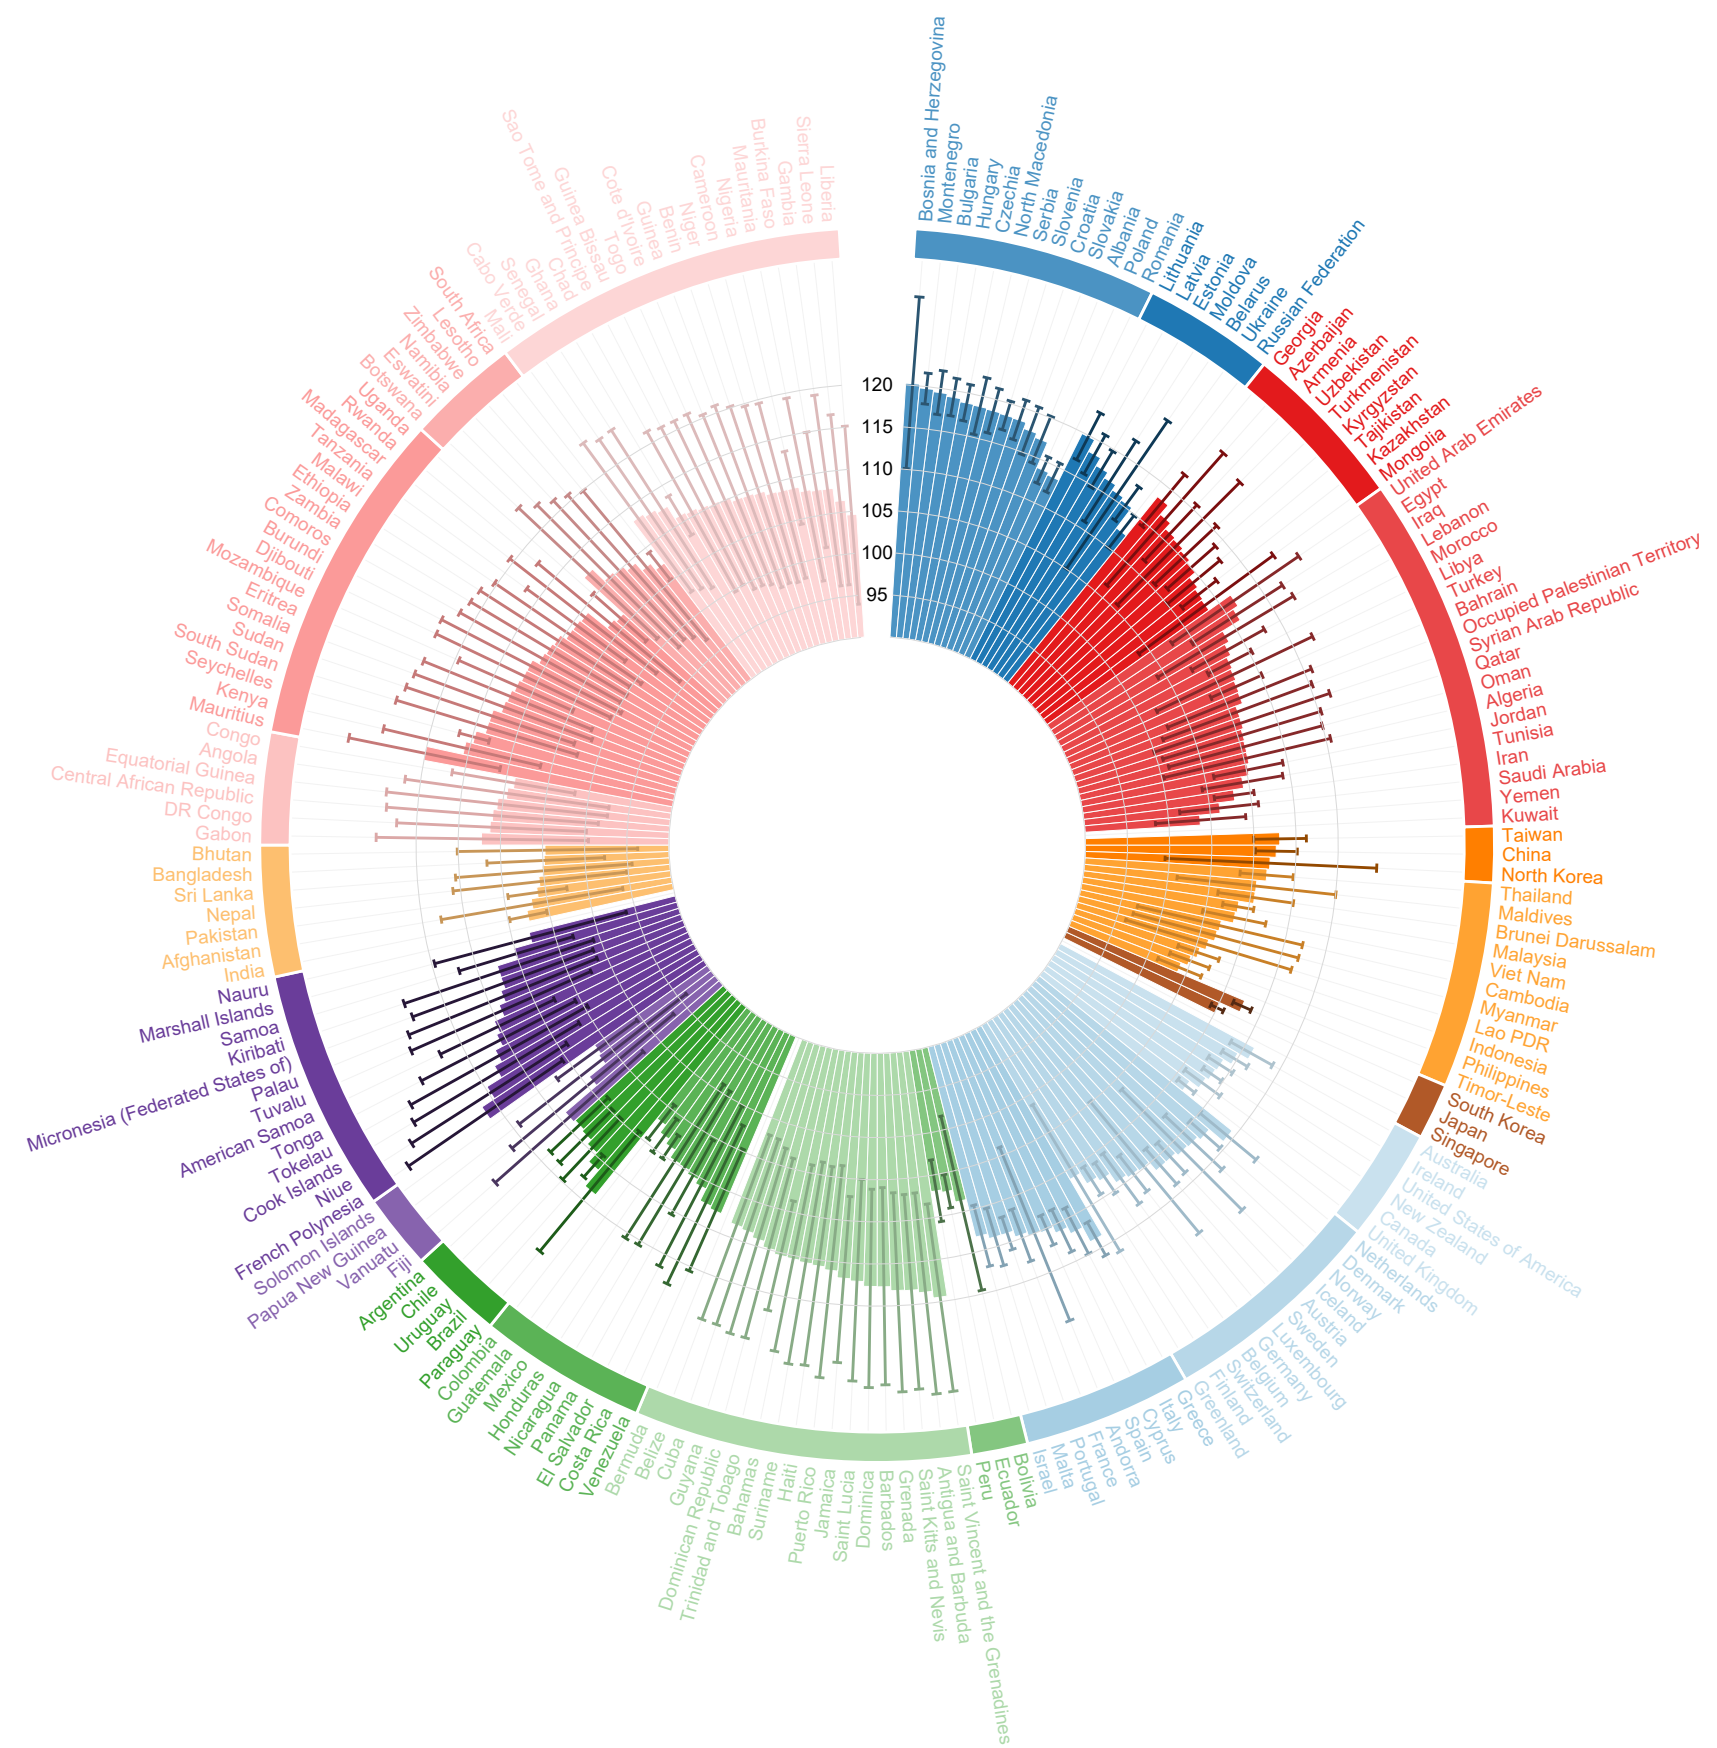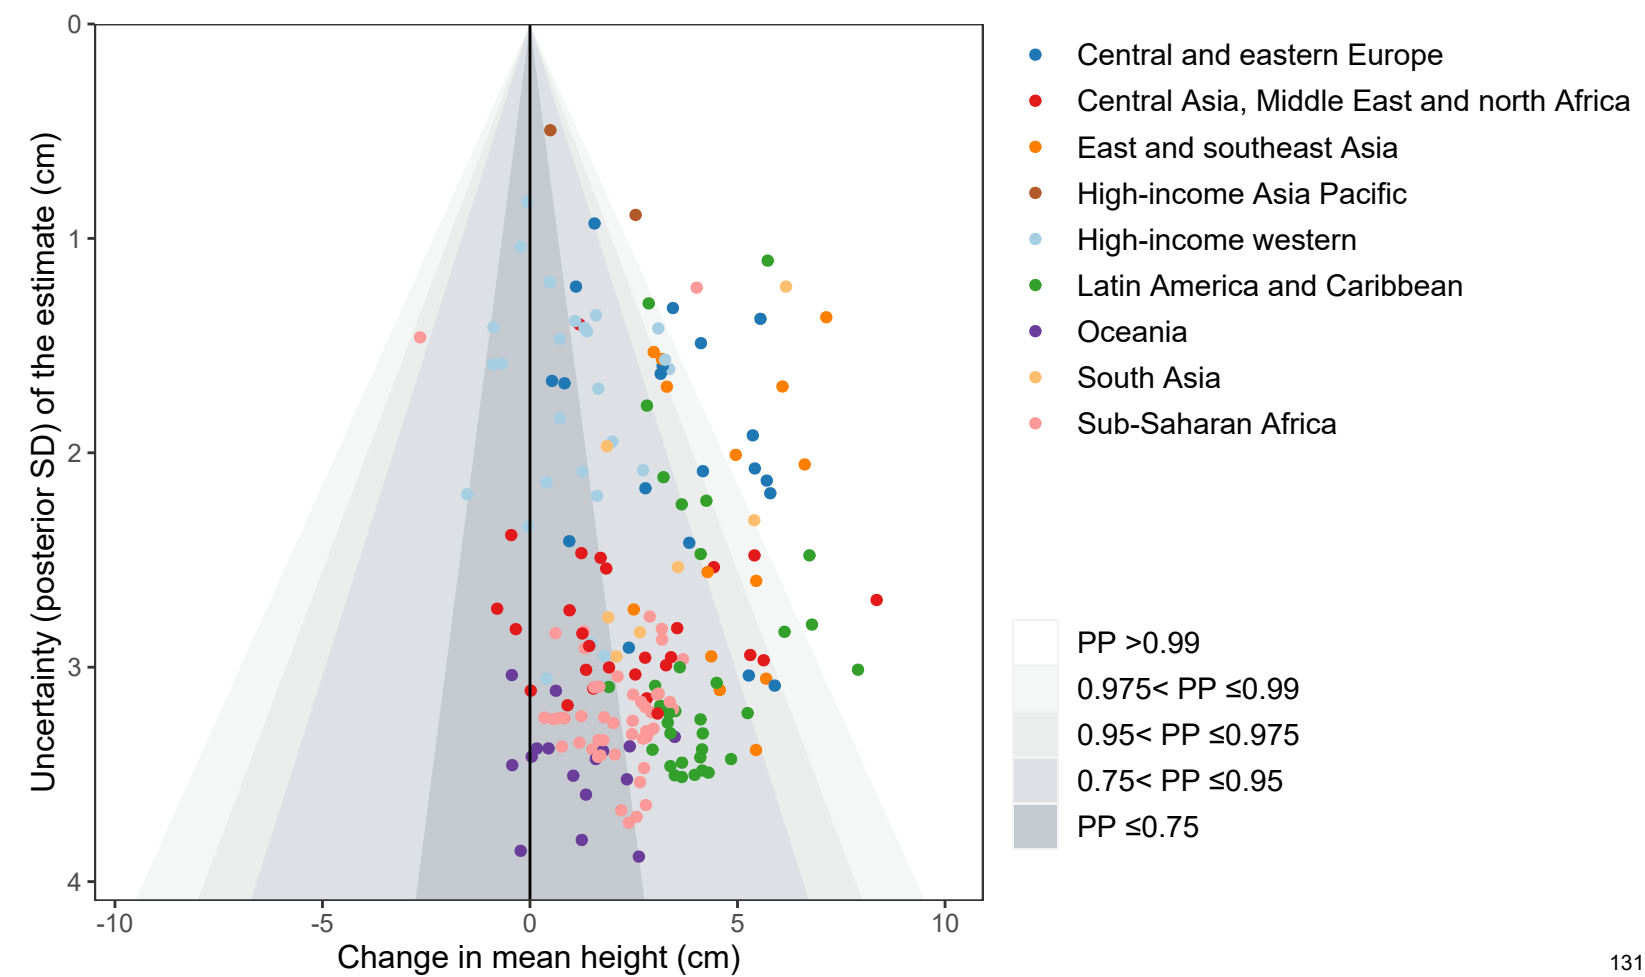



Mean height in 2020 (girls, age 10, urban)

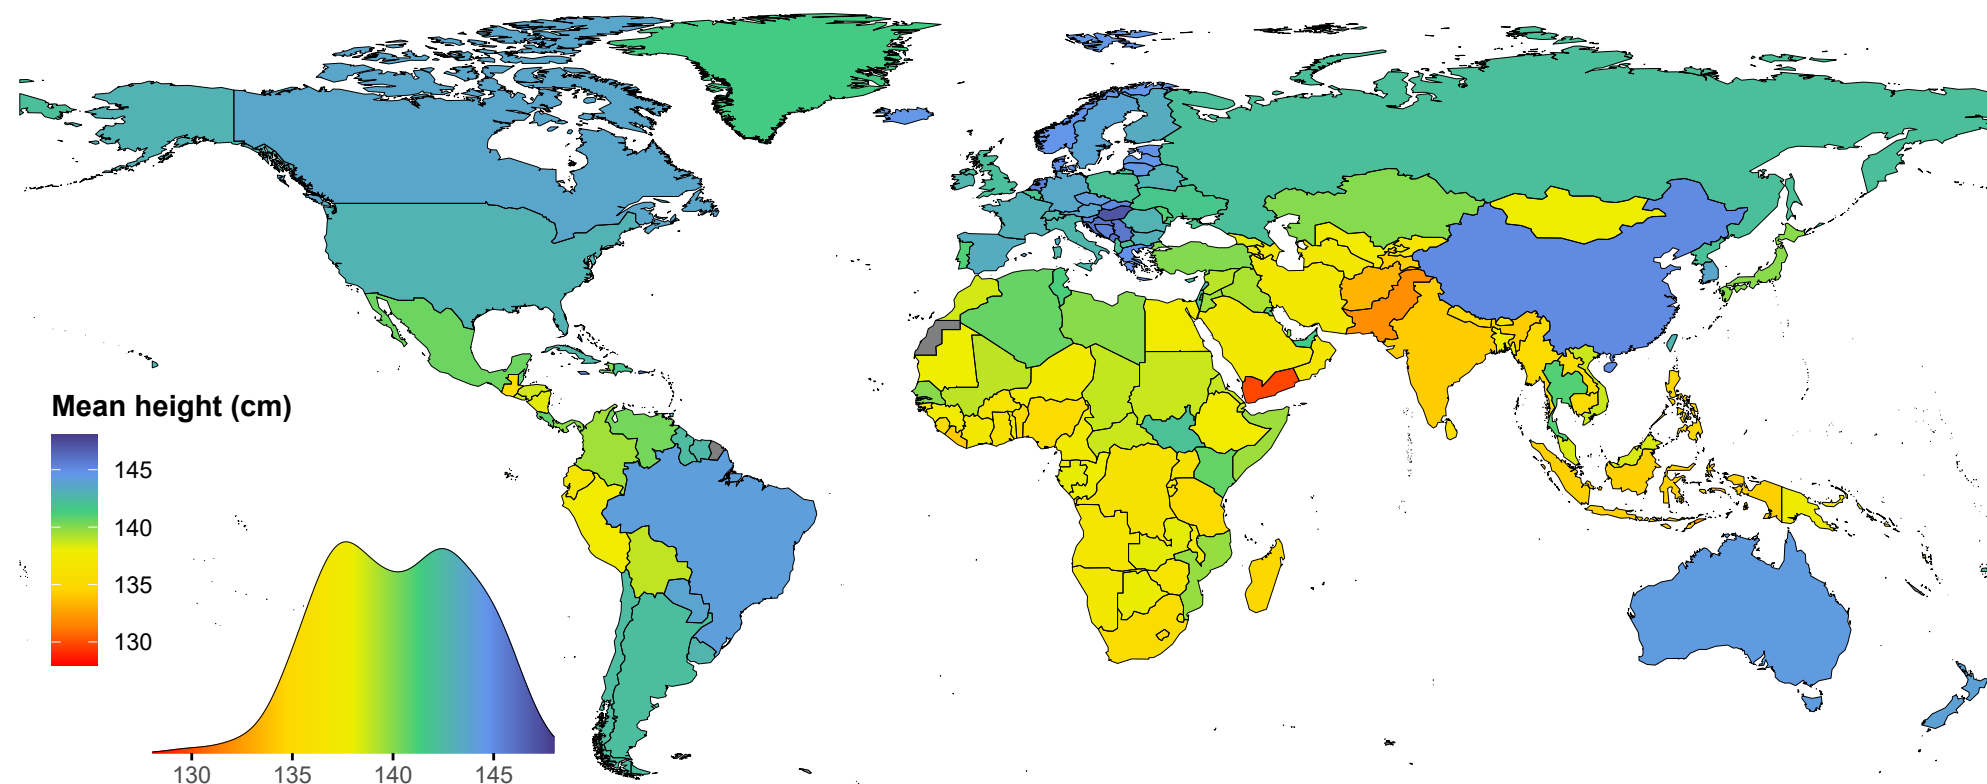

- |                                                               |                                                                      |                                                                   |                                                             |
|---------------------------------------------------------------|----------------------------------------------------------------------|-------------------------------------------------------------------|-------------------------------------------------------------|
| <span style="color: blue;">■</span> American Samoa            | <span style="color: teal;">■</span> Fiji                             | <span style="color: blue;">■</span> Montenegro                    | <span style="color: blue;">■</span> Seychelles              |
| <span style="color: teal;">■</span> Bahrain                   | <span style="color: blue;">■</span> French Polynesia                 | <span style="color: yellow-green;">■</span> Nauru                 | <span style="color: yellow-green;">■</span> Solomon Islands |
| <span style="color: blue;">■</span> Bermuda                   | <span style="color: teal;">■</span> Kiribati                         | <span style="color: blue;">■</span> Niue                          | <span style="color: grey;">■</span> Tokelau                 |
| <span style="color: yellow-green;">■</span> Brunei Darussalam | <span style="color: yellow-green;">■</span> Maldives                 | <span style="color: green;">■</span> Palau                        | <span style="color: blue;">■</span> Tonga                   |
| <span style="color: teal;">■</span> Cape Verde                | <span style="color: yellow-green;">■</span> Marshall Islands         | <span style="color: green;">■</span> Samoa                        | <span style="color: teal;">■</span> Tuvalu                  |
| <span style="color: yellow-green;">■</span> Comoros           | <span style="color: blue;">■</span> Mauritius                        | <span style="color: yellow-green;">■</span> Sao Tome and Principe | <span style="color: yellow-green;">■</span> Vanuatu         |
| <span style="color: blue;">■</span> Cook Islands              | <span style="color: green;">■</span> Mirconesia, Federated States of |                                                                   |                                                             |

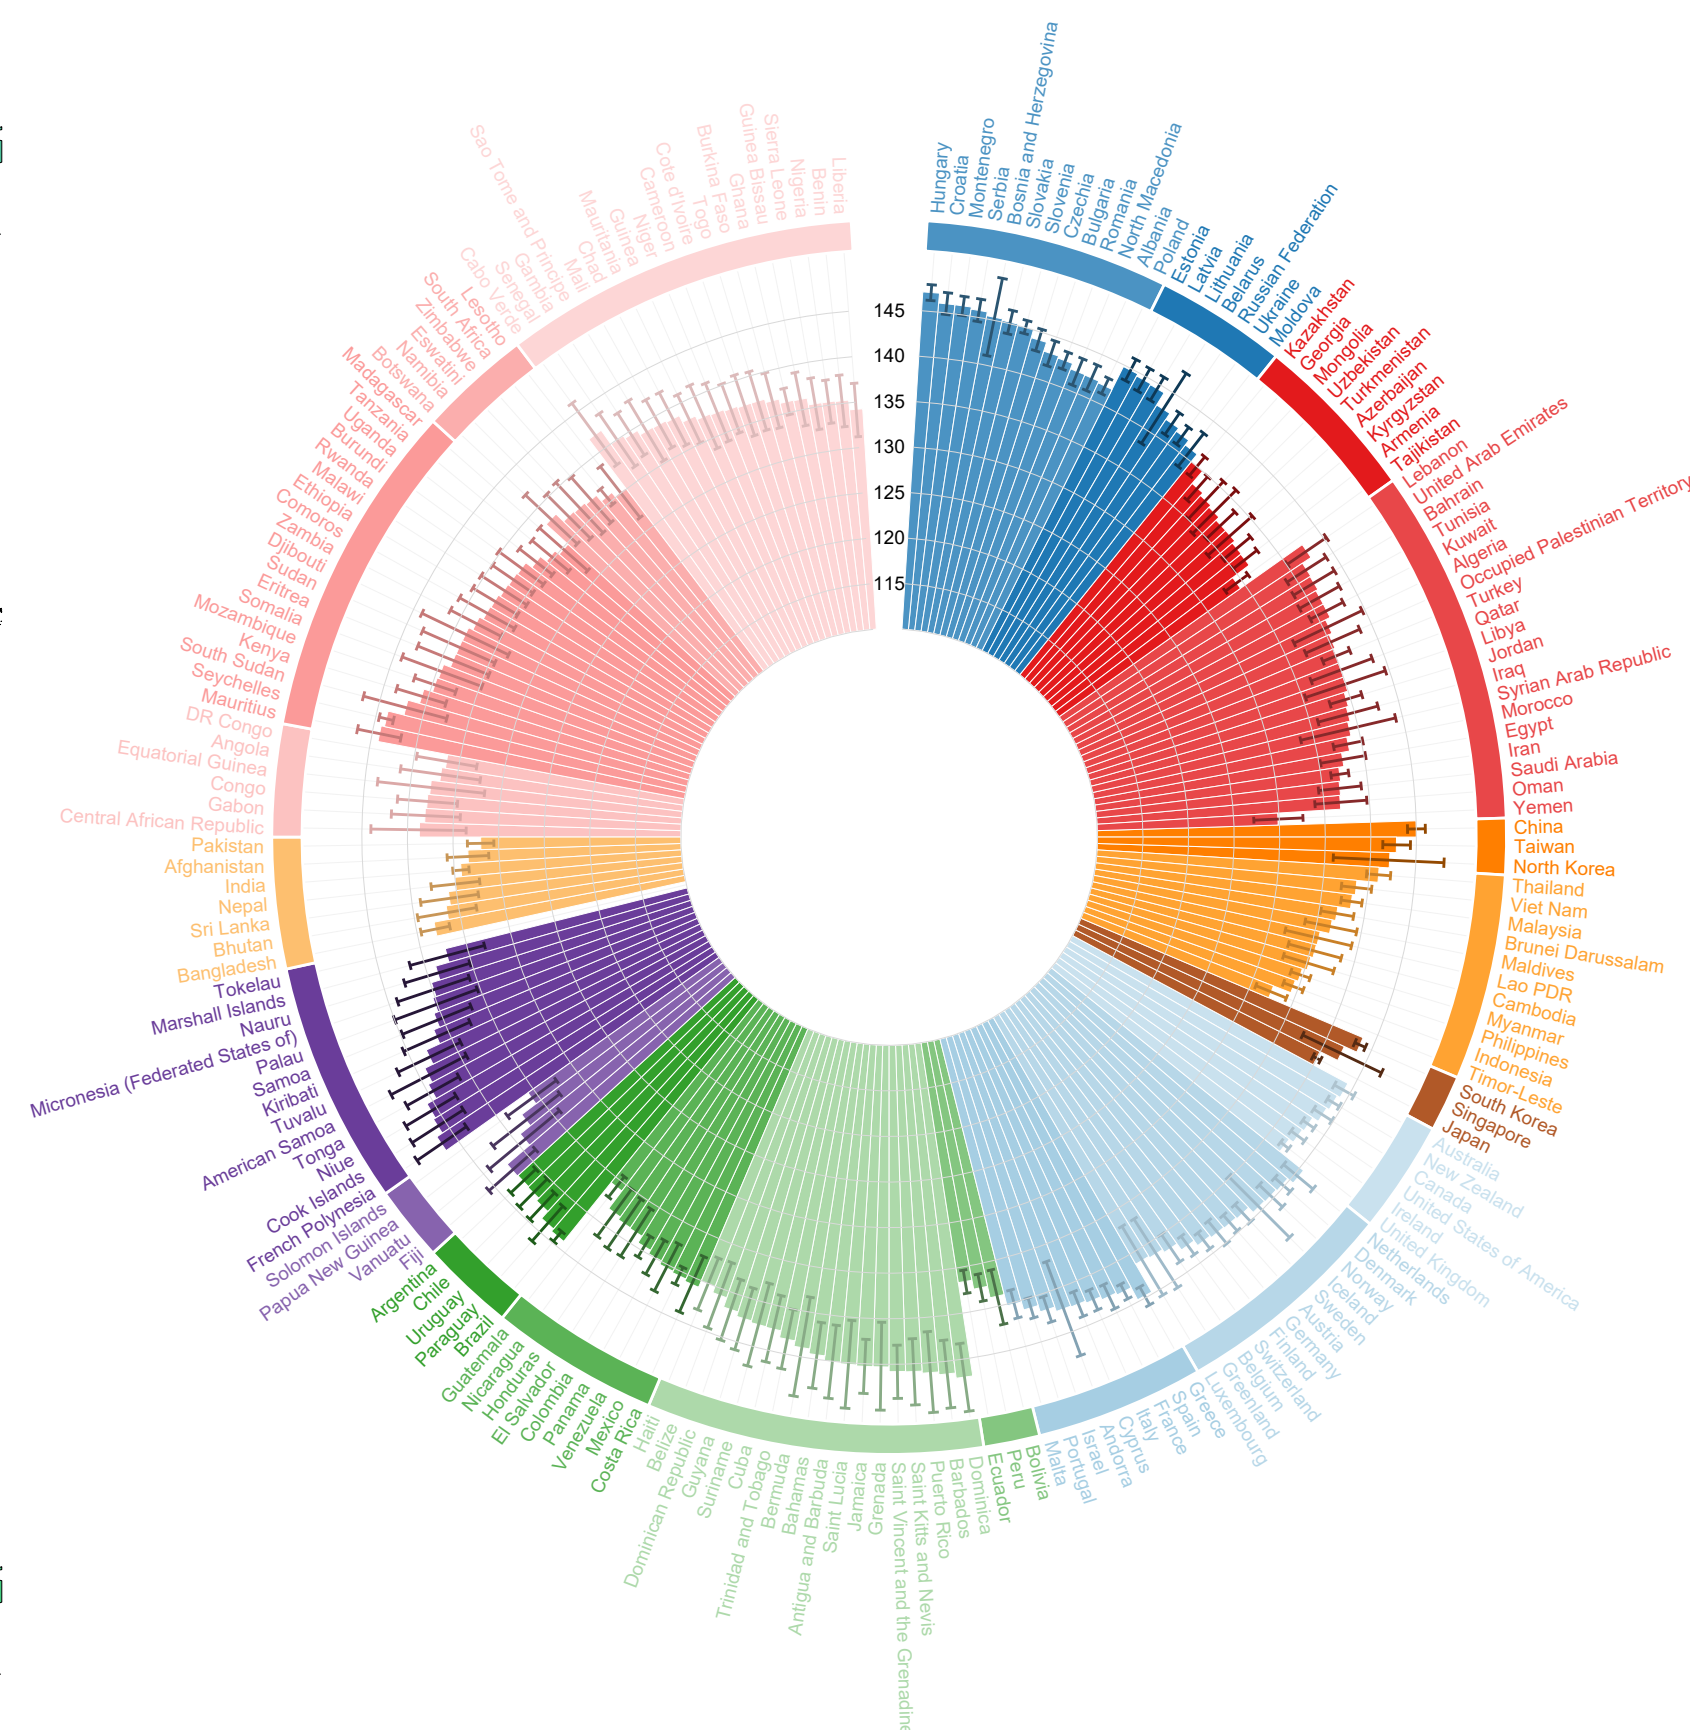

Change 1990-2020 (girls, age 10, urban)

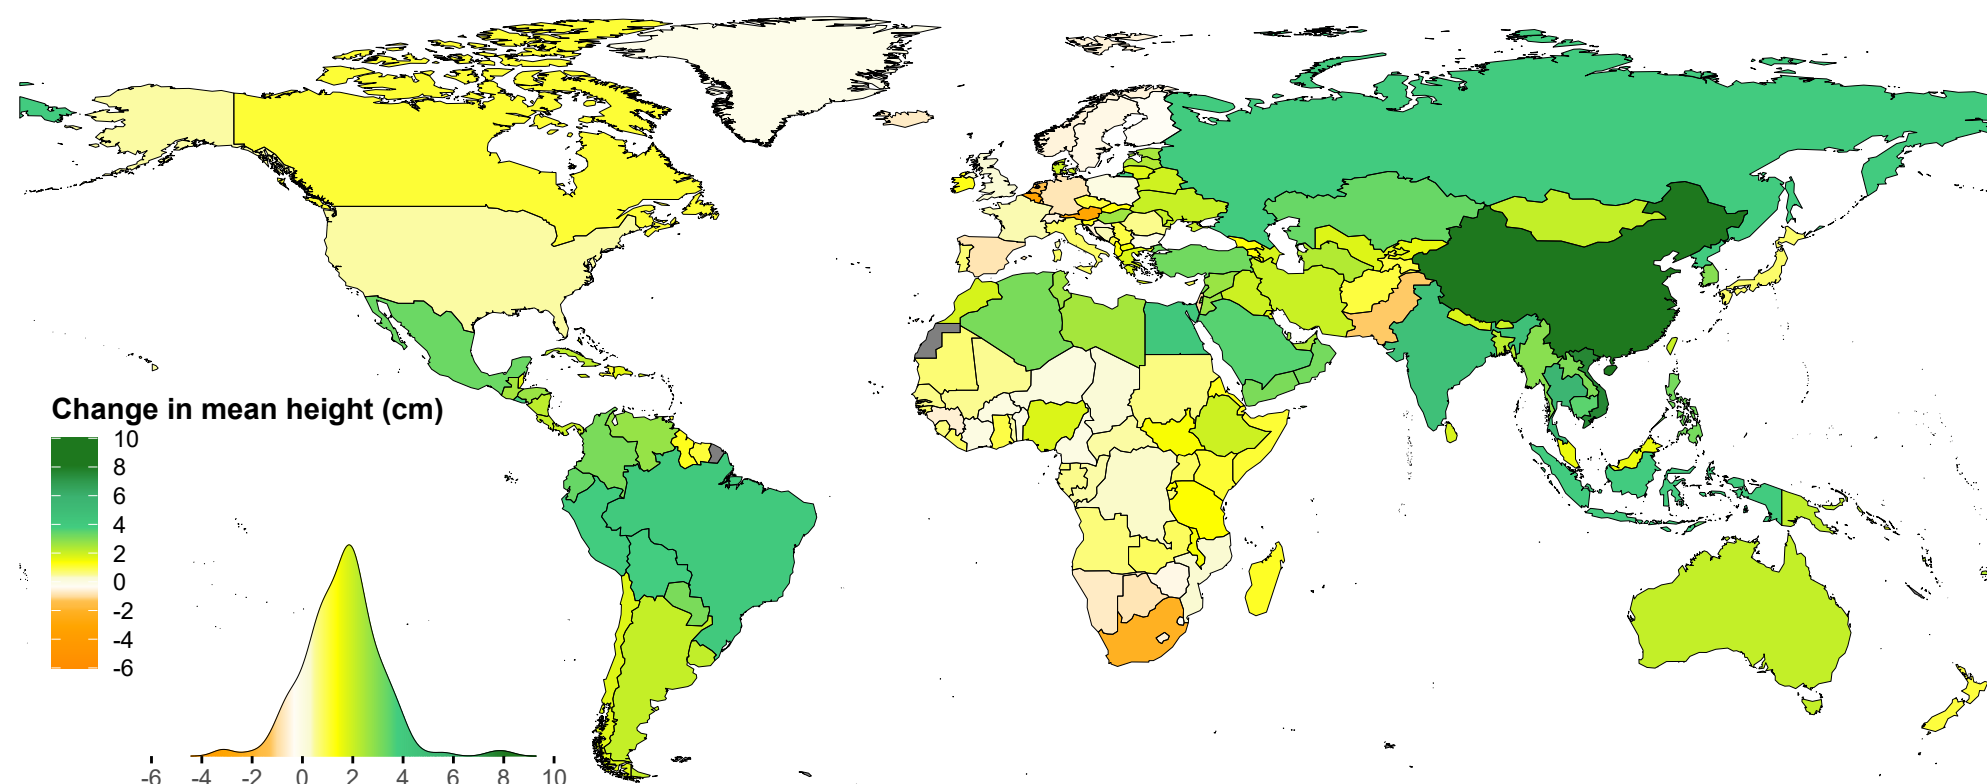

- |                                                            |                                                                             |                                                                   |                                                             |
|------------------------------------------------------------|-----------------------------------------------------------------------------|-------------------------------------------------------------------|-------------------------------------------------------------|
| <span style="color: yellow-green;">■</span> American Samoa | <span style="color: yellow-green;">■</span> Fiji                            | <span style="color: yellow-green;">■</span> Montenegro            | <span style="color: yellow-green;">■</span> Seychelles      |
| <span style="color: green;">■</span> Bahrain               | <span style="color: green;">■</span> French Polynesia                       | <span style="color: yellow-green;">■</span> Nauru                 | <span style="color: yellow-green;">■</span> Solomon Islands |
| <span style="color: yellow-green;">■</span> Bermuda        | <span style="color: green;">■</span> Kiribati                               | <span style="color: yellow-green;">■</span> Niue                  | <span style="color: grey;">■</span> Tokelau                 |
| <span style="color: green;">■</span> Brunei Darussalam     | <span style="color: green;">■</span> Maldives                               | <span style="color: yellow-green;">■</span> Palau                 | <span style="color: yellow-green;">■</span> Tonga           |
| <span style="color: yellow-green;">■</span> Cape Verde     | <span style="color: green;">■</span> Marshall Islands                       | <span style="color: yellow-green;">■</span> Samoa                 | <span style="color: yellow-green;">■</span> Tuvalu          |
| <span style="color: yellow-green;">■</span> Comoros        | <span style="color: yellow-green;">■</span> Mauritius                       | <span style="color: yellow-green;">■</span> Sao Tome and Principe | <span style="color: yellow-green;">■</span> Vanuatu         |
| <span style="color: green;">■</span> Cook Islands          | <span style="color: yellow-green;">■</span> Mirconesia, Federated States of |                                                                   |                                                             |

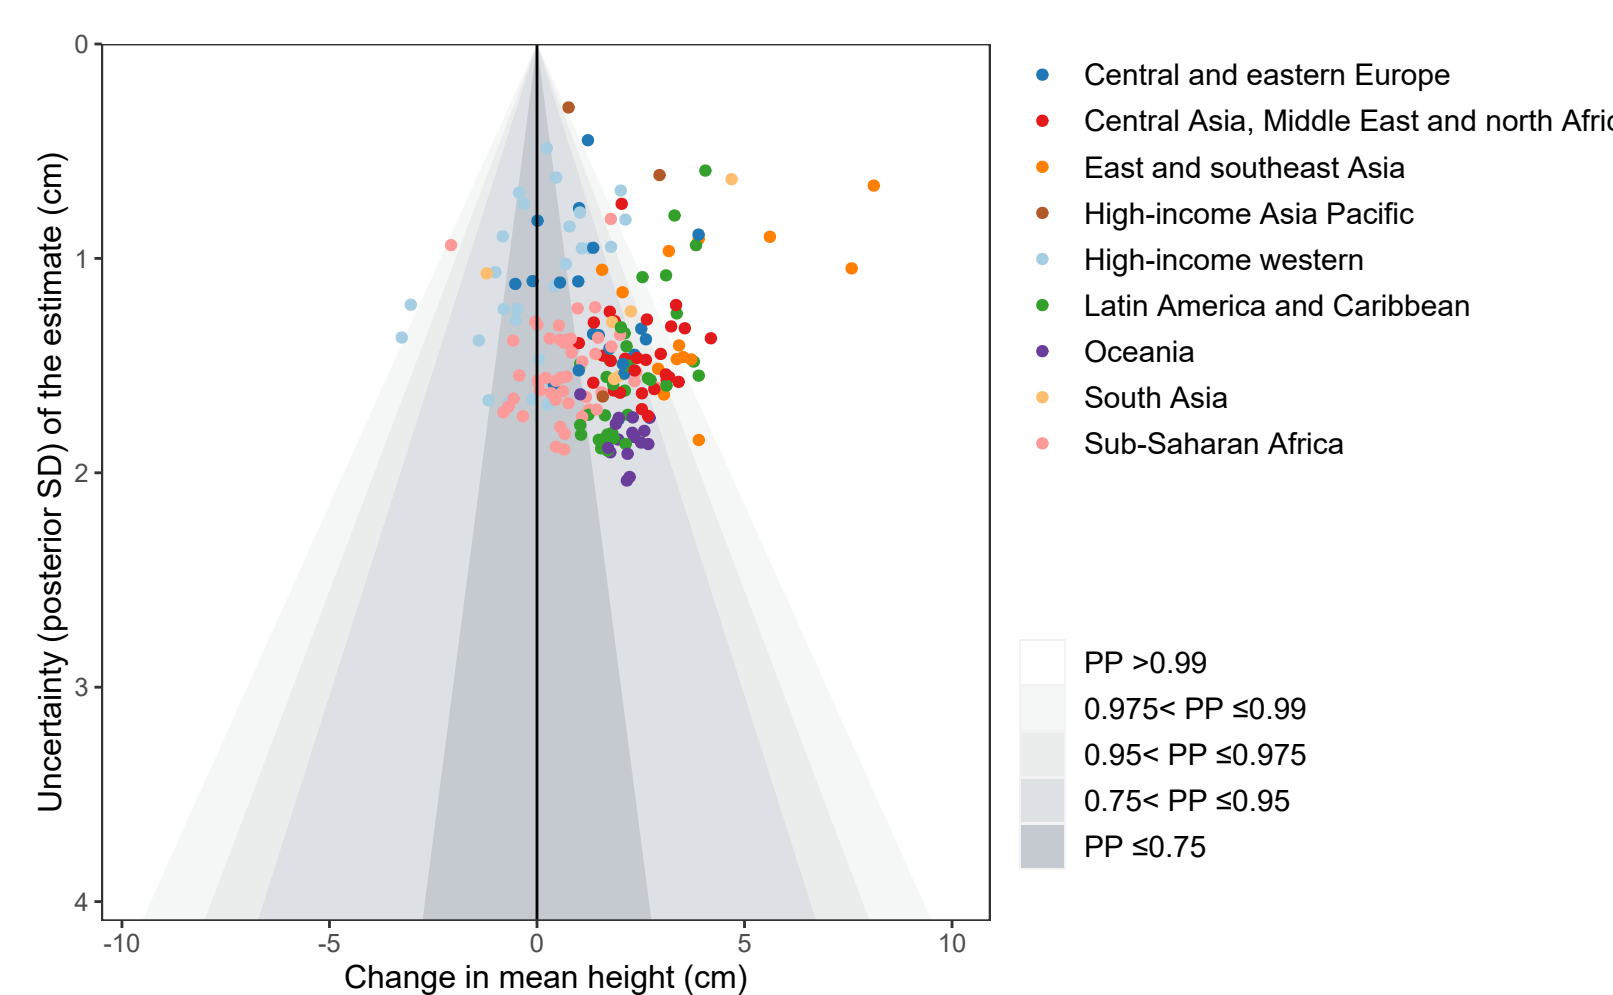



Mean height in 2020 (girls, age 10, rural)

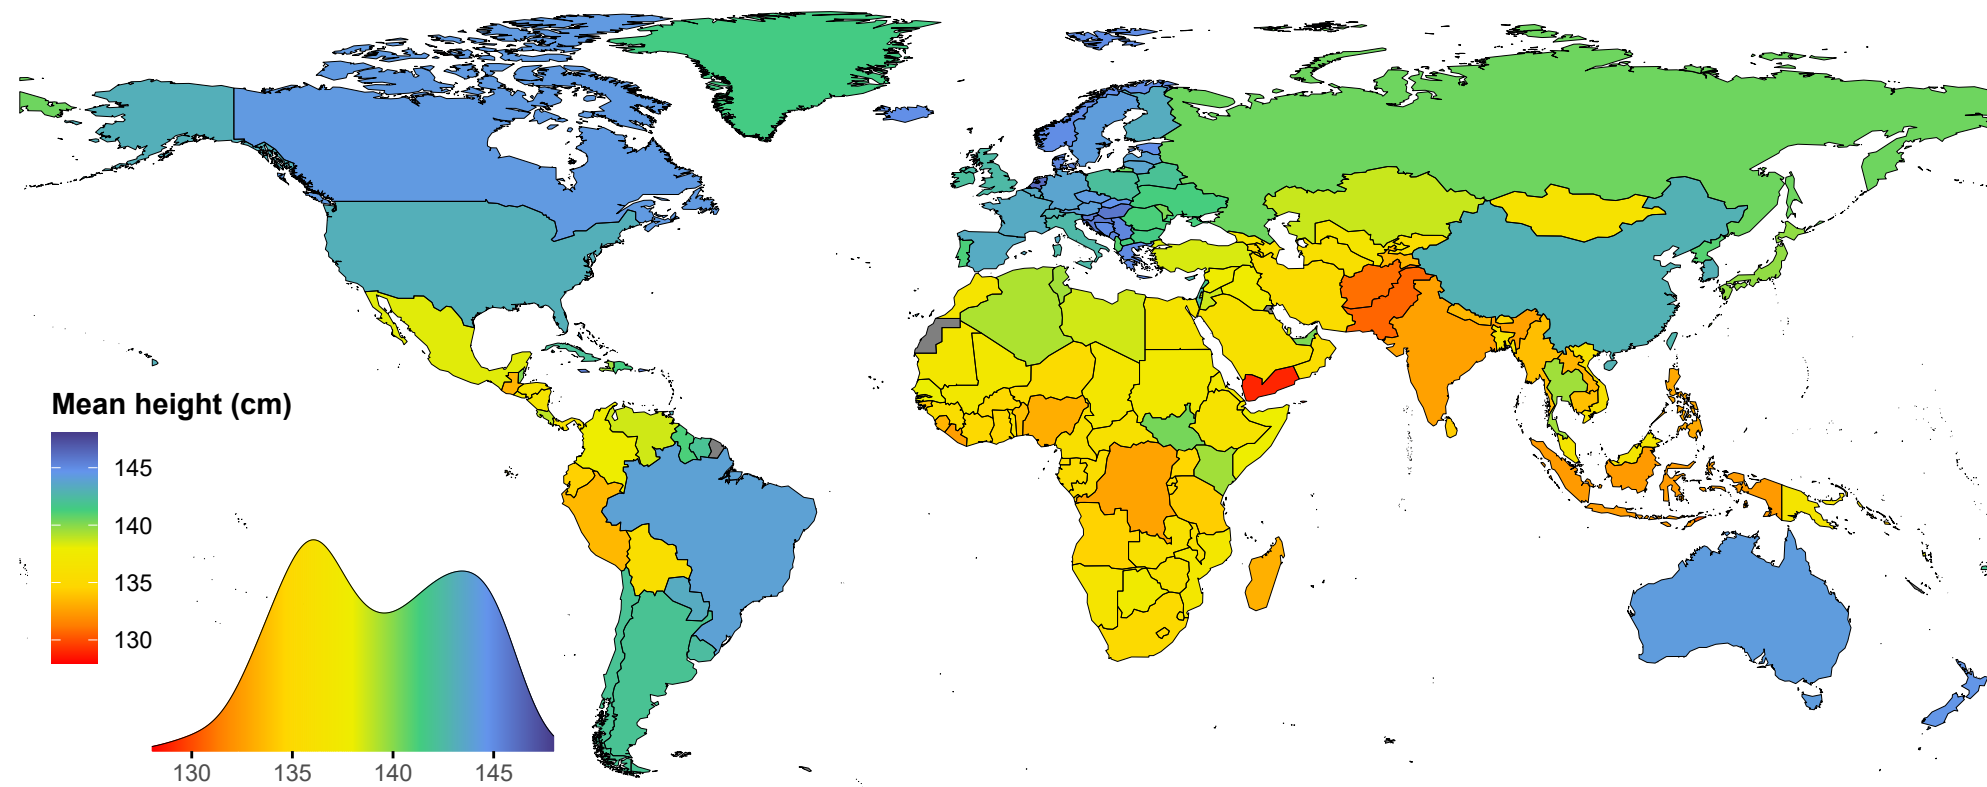

- |                                                         |                                                                      |                                                             |                                                       |
|---------------------------------------------------------|----------------------------------------------------------------------|-------------------------------------------------------------|-------------------------------------------------------|
| <span style="color: blue;">■</span> American Samoa      | <span style="color: green;">■</span> Fiji                            | <span style="color: blue;">■</span> Montenegro              | <span style="color: blue;">■</span> Seychelles        |
| <span style="color: green;">■</span> Bahrain            | <span style="color: blue;">■</span> French Polynesia                 | <span style="color: grey;">■</span> Nauru                   | <span style="color: yellow;">■</span> Solomon Islands |
| <span style="color: grey;">■</span> Bermuda             | <span style="color: green;">■</span> Kiribati                        | <span style="color: blue;">■</span> Niue                    | <span style="color: blue;">■</span> Tokelau           |
| <span style="color: yellow;">■</span> Brunei Darussalam | <span style="color: yellow;">■</span> Maldives                       | <span style="color: green;">■</span> Palau                  | <span style="color: blue;">■</span> Tonga             |
| <span style="color: green;">■</span> Cape Verde         | <span style="color: yellow;">■</span> Marshall Islands               | <span style="color: green;">■</span> Samoa                  | <span style="color: teal;">■</span> Tuvalu            |
| <span style="color: yellow;">■</span> Comoros           | <span style="color: teal;">■</span> Mauritius                        | <span style="color: yellow;">■</span> Sao Tome and Principe | <span style="color: yellow;">■</span> Vanuatu         |
| <span style="color: blue;">■</span> Cook Islands        | <span style="color: green;">■</span> Mirconesia, Federated States of |                                                             |                                                       |

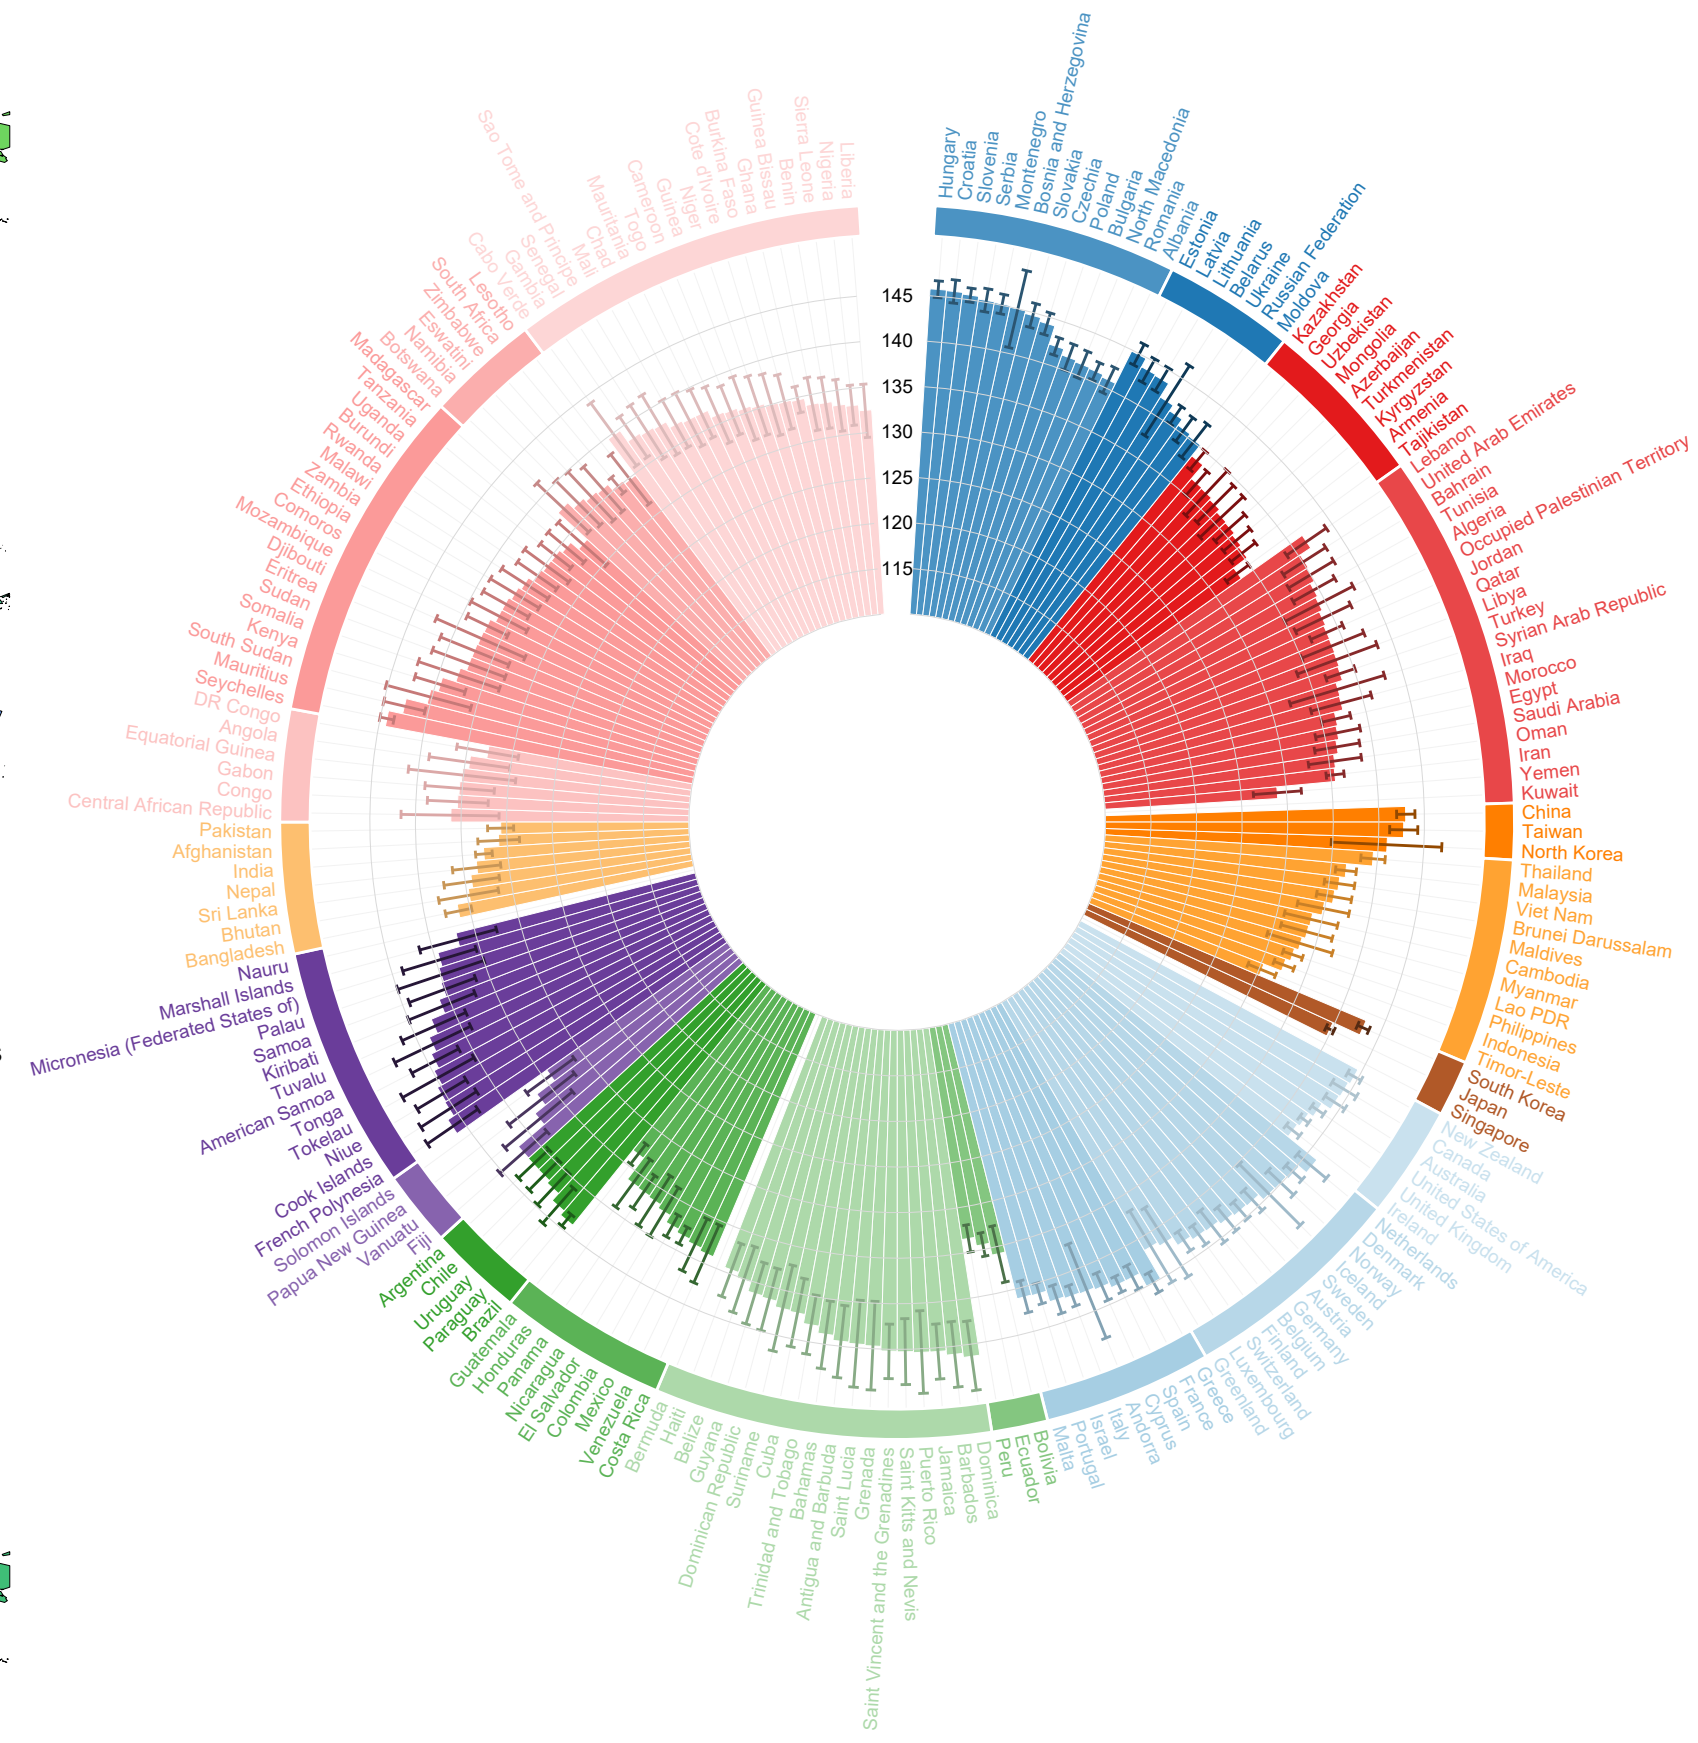

Change 1990-2020 (girls, age 10, rural)

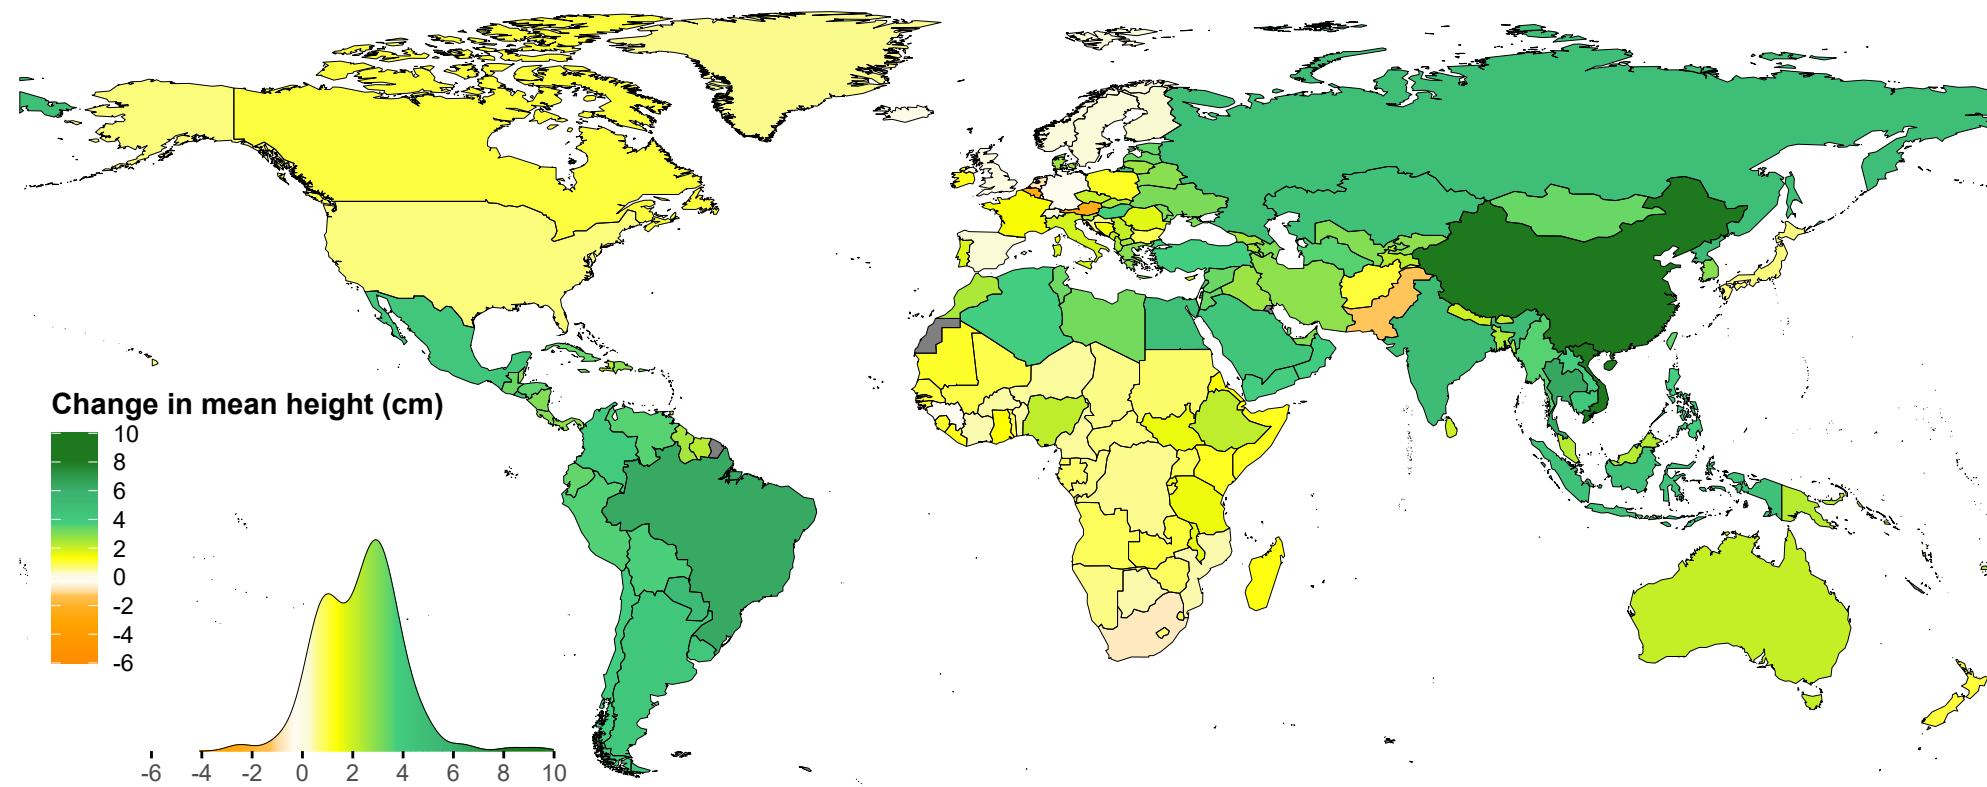

- |                                                        |                                                                      |                                                            |                                                       |
|--------------------------------------------------------|----------------------------------------------------------------------|------------------------------------------------------------|-------------------------------------------------------|
| <span style="color: green;">■</span> American Samoa    | <span style="color: green;">■</span> Fiji                            | <span style="color: yellow;">■</span> Montenegro           | <span style="color: yellow;">■</span> Seychelles      |
| <span style="color: green;">■</span> Bahrain           | <span style="color: green;">■</span> French Polynesia                | <span style="color: grey;">■</span> Nauru                  | <span style="color: yellow;">■</span> Solomon Islands |
| <span style="color: grey;">■</span> Bermuda            | <span style="color: green;">■</span> Kiribati                        | <span style="color: green;">■</span> Niue                  | <span style="color: green;">■</span> Tokelau          |
| <span style="color: green;">■</span> Brunei Darussalam | <span style="color: green;">■</span> Maldives                        | <span style="color: green;">■</span> Palau                 | <span style="color: yellow;">■</span> Tonga           |
| <span style="color: green;">■</span> Cape Verde        | <span style="color: green;">■</span> Marshall Islands                | <span style="color: green;">■</span> Samoa                 | <span style="color: green;">■</span> Tuvalu           |
| <span style="color: yellow;">■</span> Comoros          | <span style="color: green;">■</span> Mauritius                       | <span style="color: green;">■</span> Sao Tome and Principe | <span style="color: green;">■</span> Vanuatu          |
| <span style="color: green;">■</span> Cook Islands      | <span style="color: green;">■</span> Mirconesia, Federated States of |                                                            |                                                       |

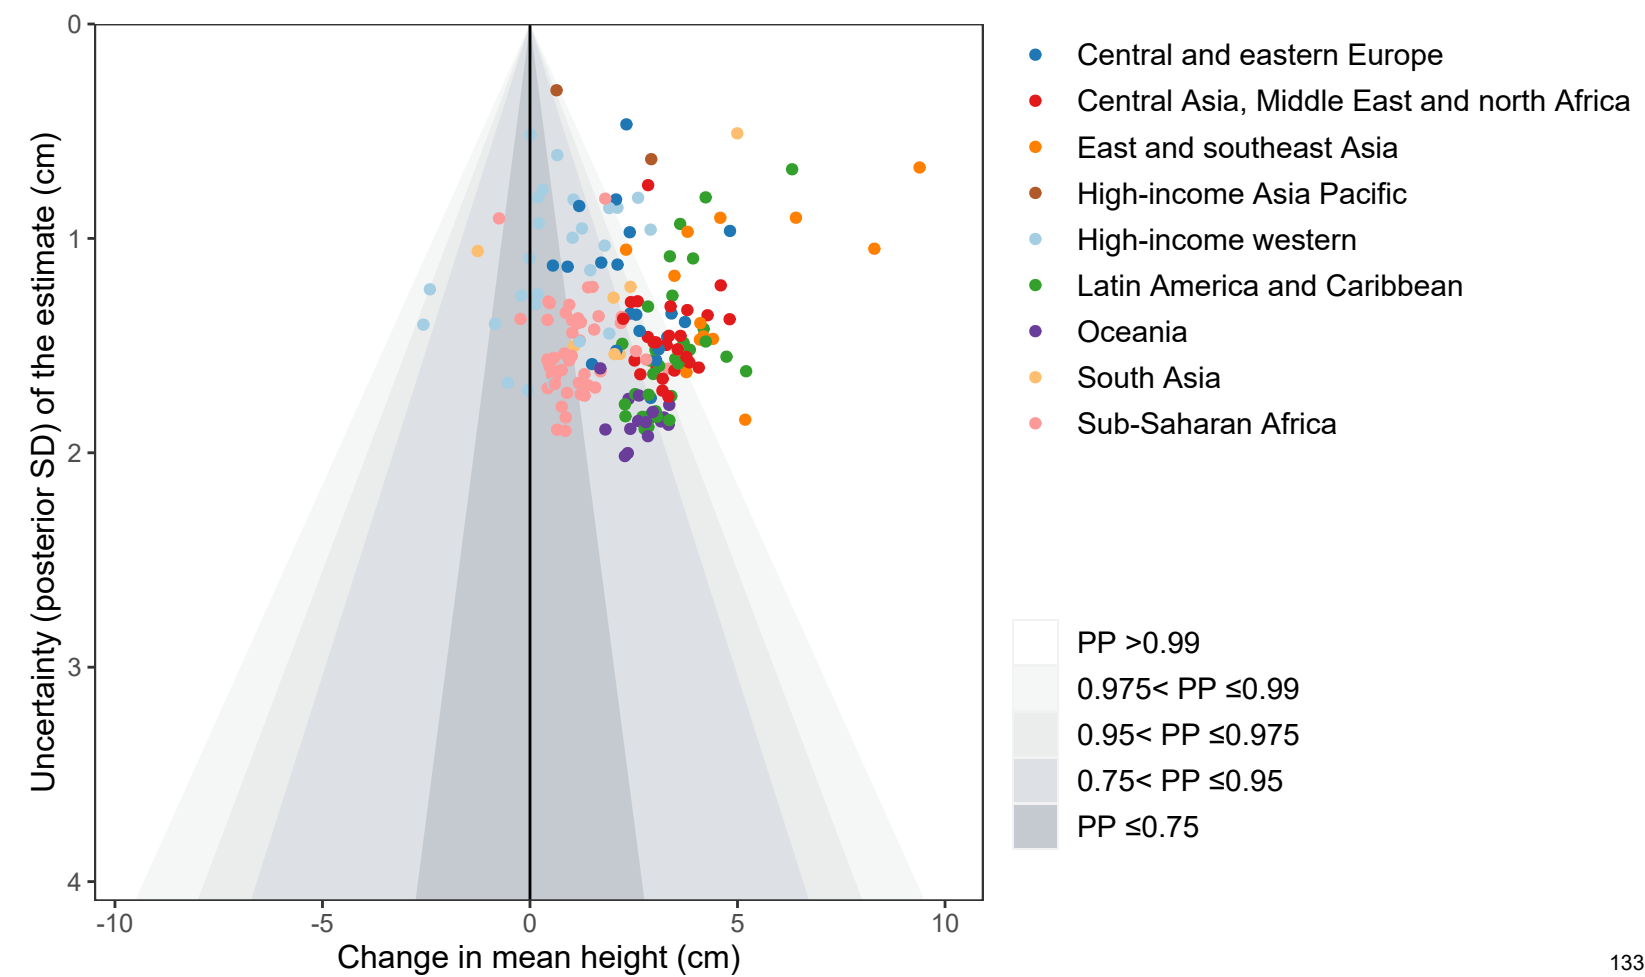



Mean height in 2020 (boys, age 10, urban)

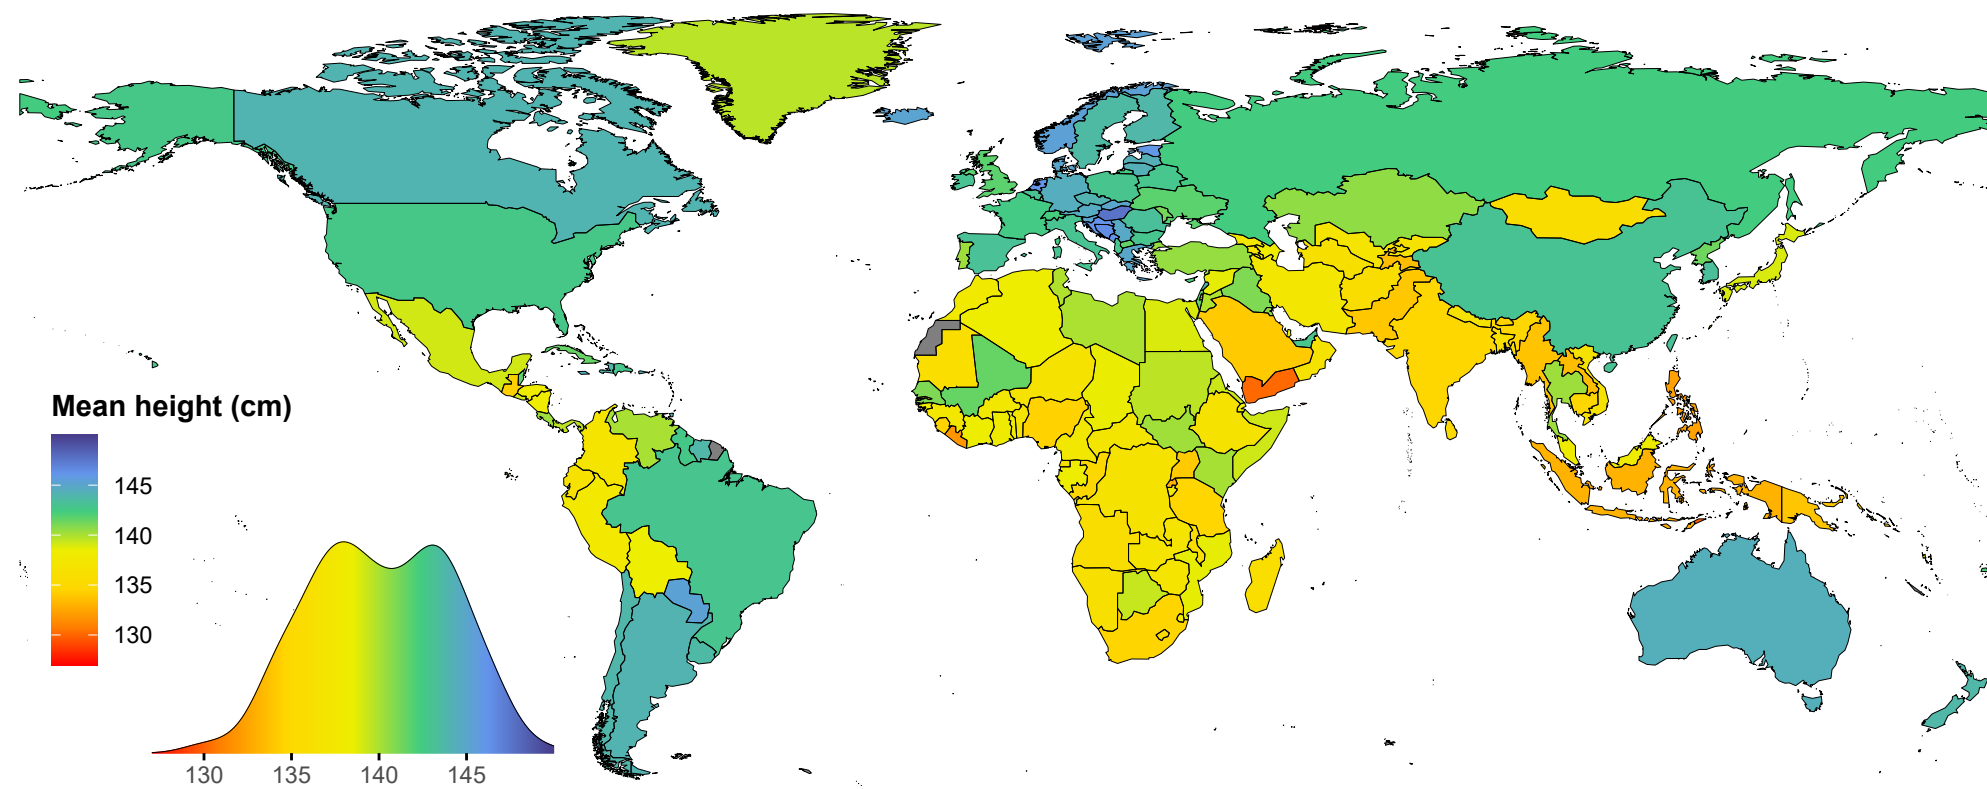

- |                   |                                 |                       |                 |
|-------------------|---------------------------------|-----------------------|-----------------|
| American Samoa    | Fiji                            | Montenegro            | Seychelles      |
| Bahrain           | French Polynesia                | Nauru                 | Solomon Islands |
| Bermuda           | Kiribati                        | Niue                  | Tokelau         |
| Brunei Darussalam | Maldives                        | Palau                 | Tonga           |
| Cape Verde        | Marshall Islands                | Samoa                 | Tuvalu          |
| Comoros           | Mauritius                       | Sao Tome and Principe | Vanuatu         |
| Cook Islands      | Mirconesia, Federated States of |                       |                 |

Change 1990-2020 (boys, age 10, urban)

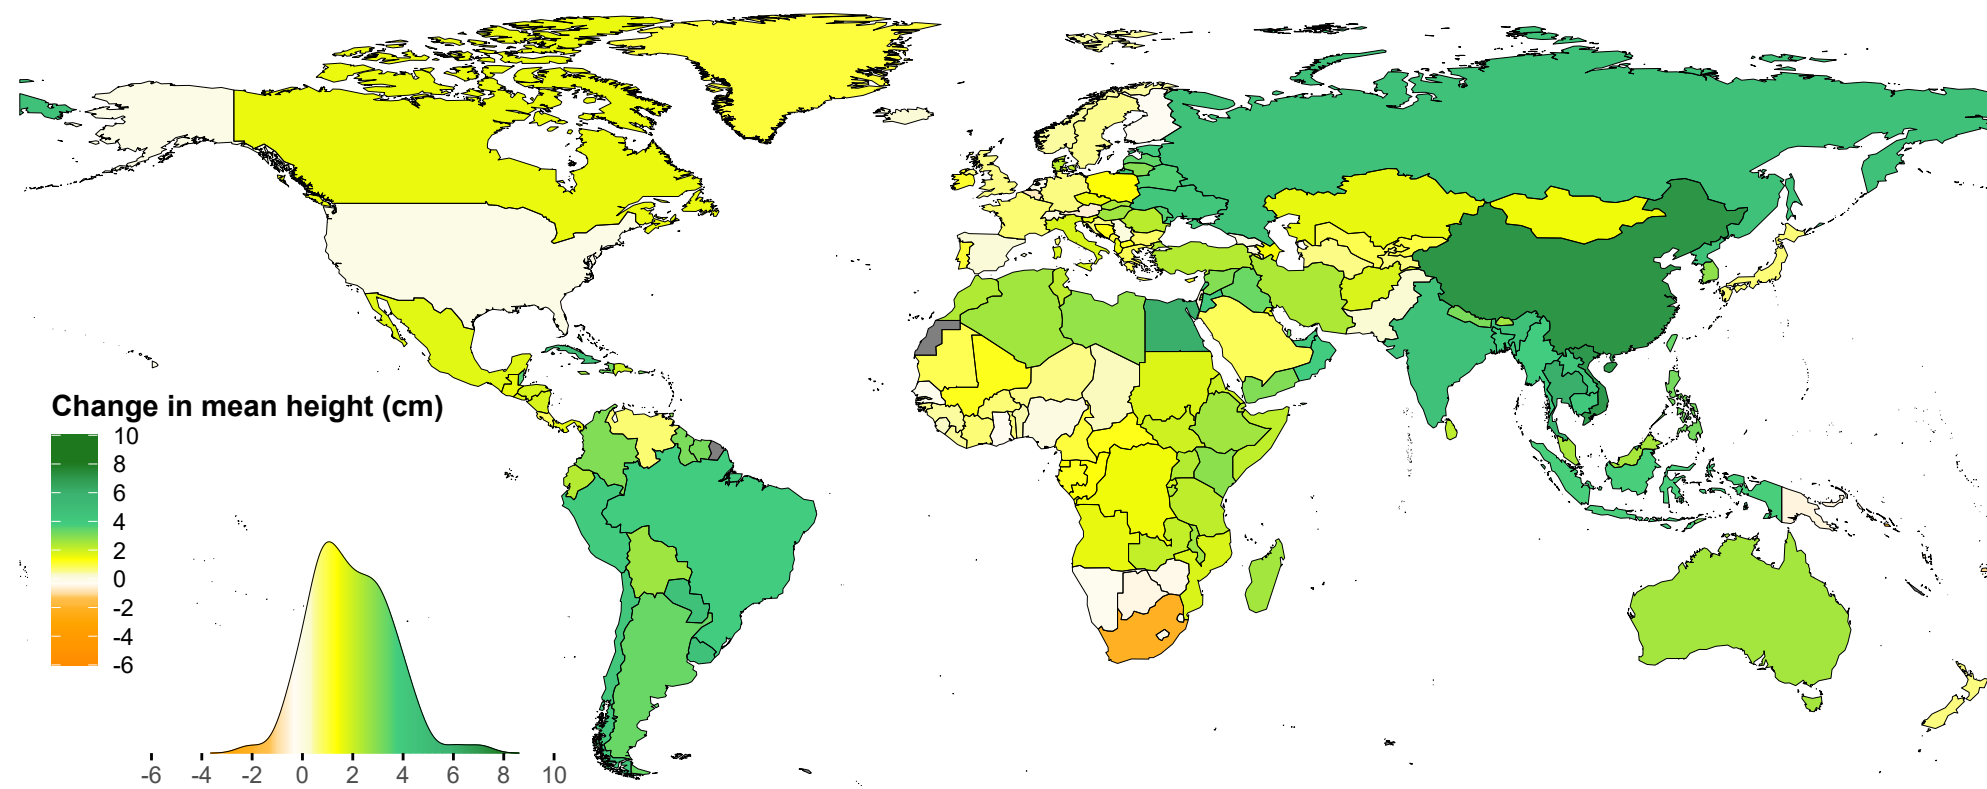

- |                   |                                 |                       |                 |
|-------------------|---------------------------------|-----------------------|-----------------|
| American Samoa    | Fiji                            | Montenegro            | Seychelles      |
| Bahrain           | French Polynesia                | Nauru                 | Solomon Islands |
| Bermuda           | Kiribati                        | Niue                  | Tokelau         |
| Brunei Darussalam | Maldives                        | Palau                 | Tonga           |
| Cape Verde        | Marshall Islands                | Samoa                 | Tuvalu          |
| Comoros           | Mauritius                       | Sao Tome and Principe | Vanuatu         |
| Cook Islands      | Mirconesia, Federated States of |                       |                 |

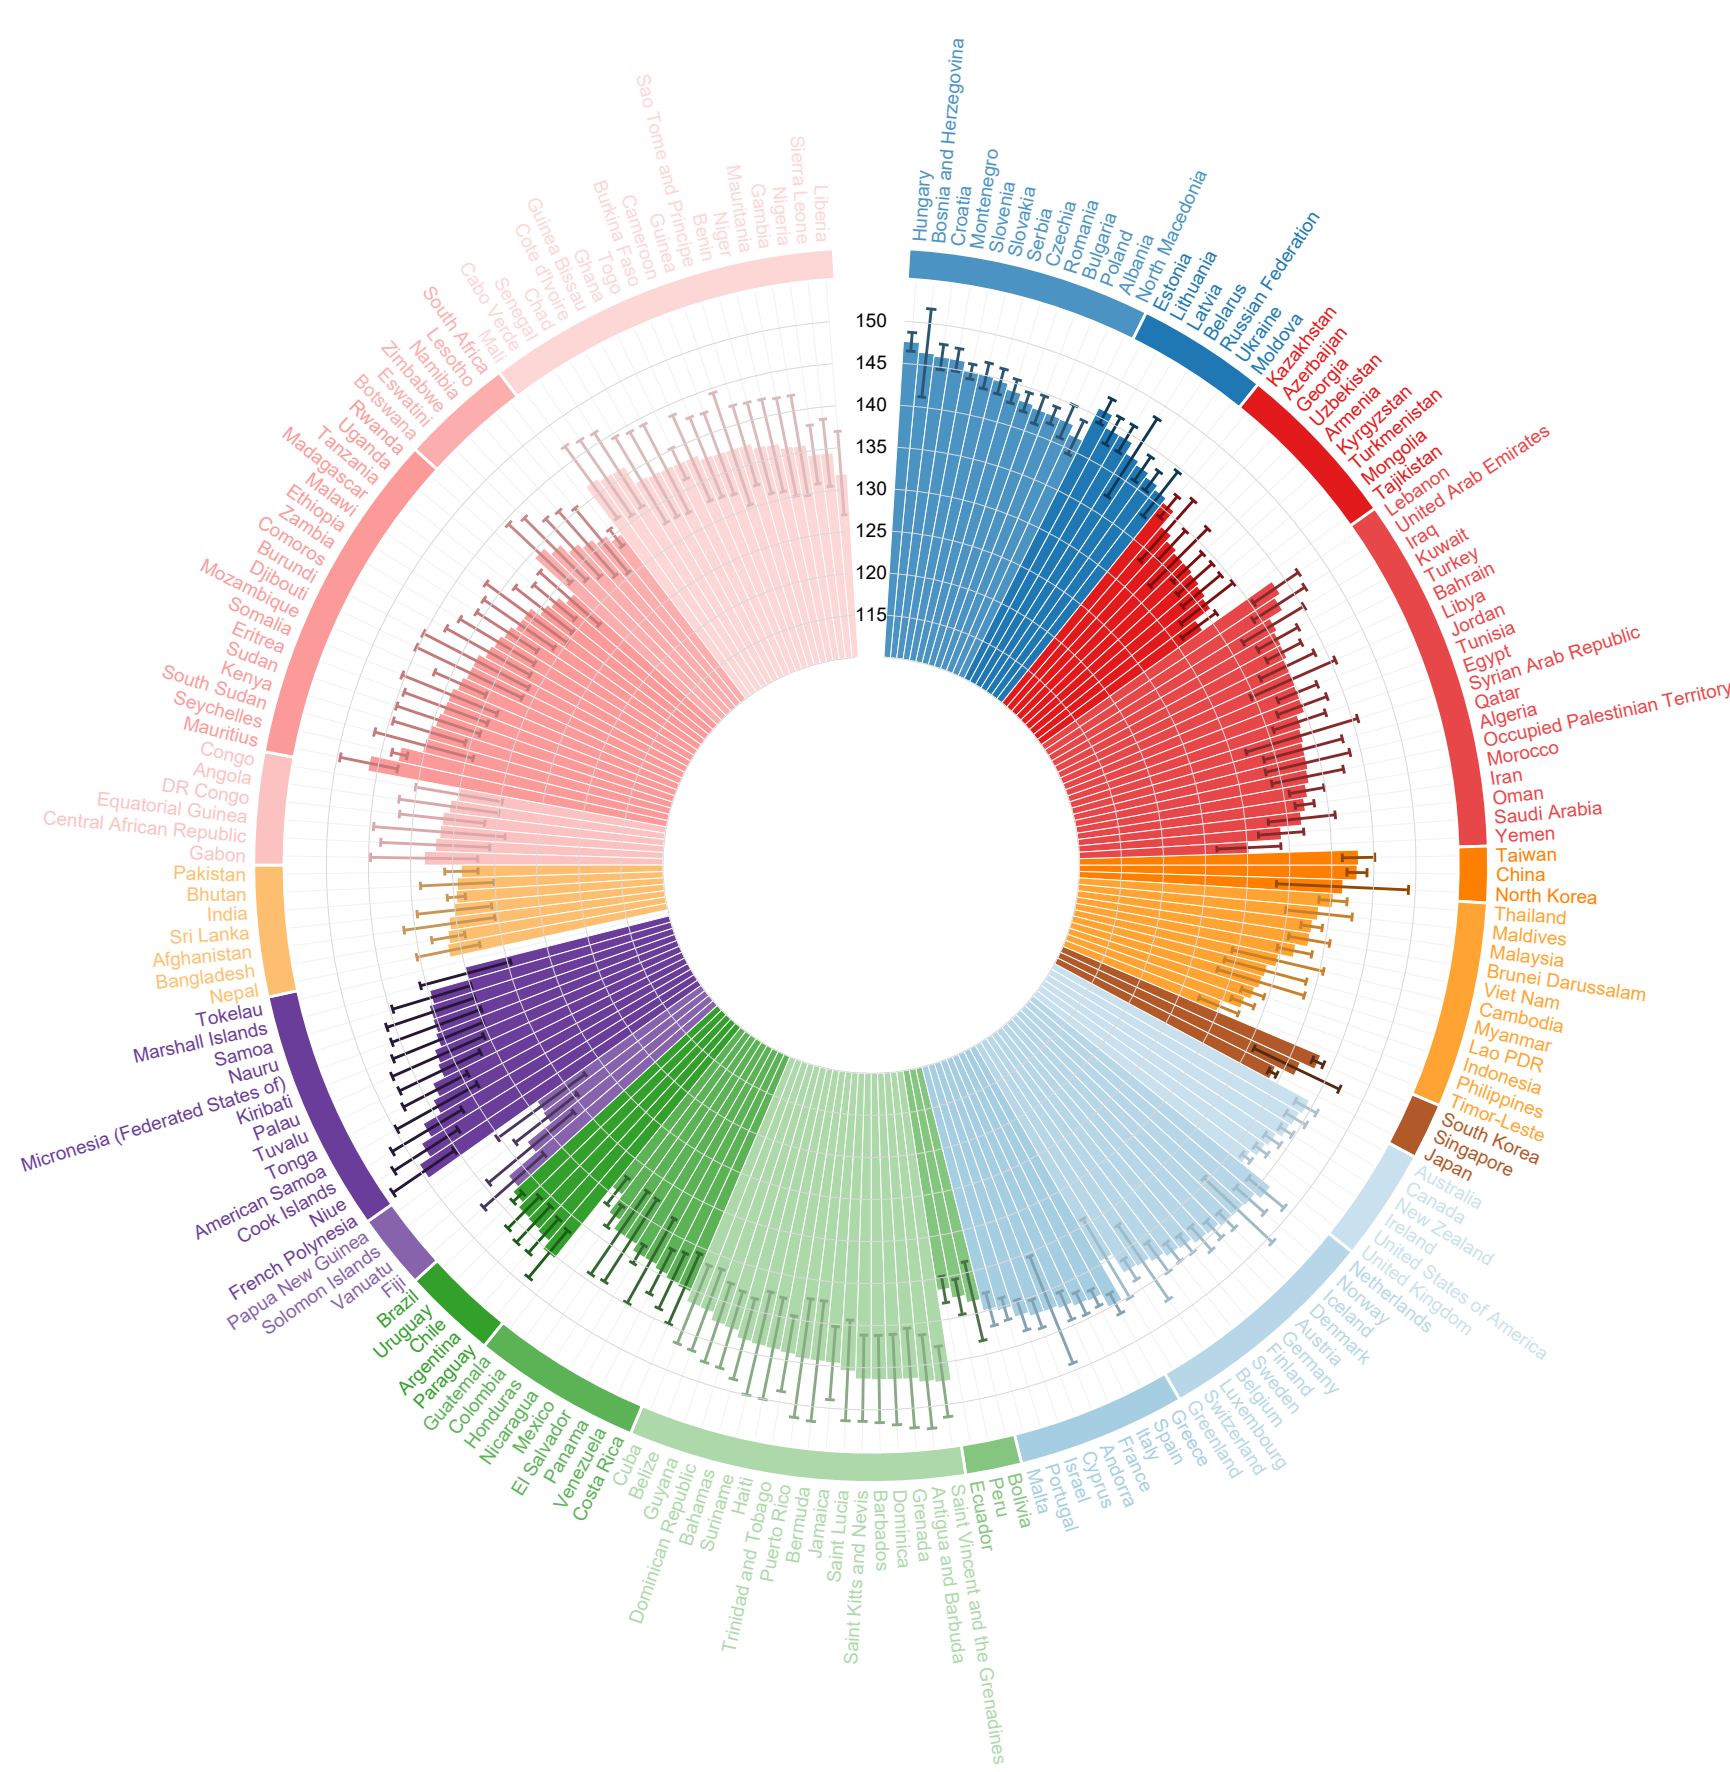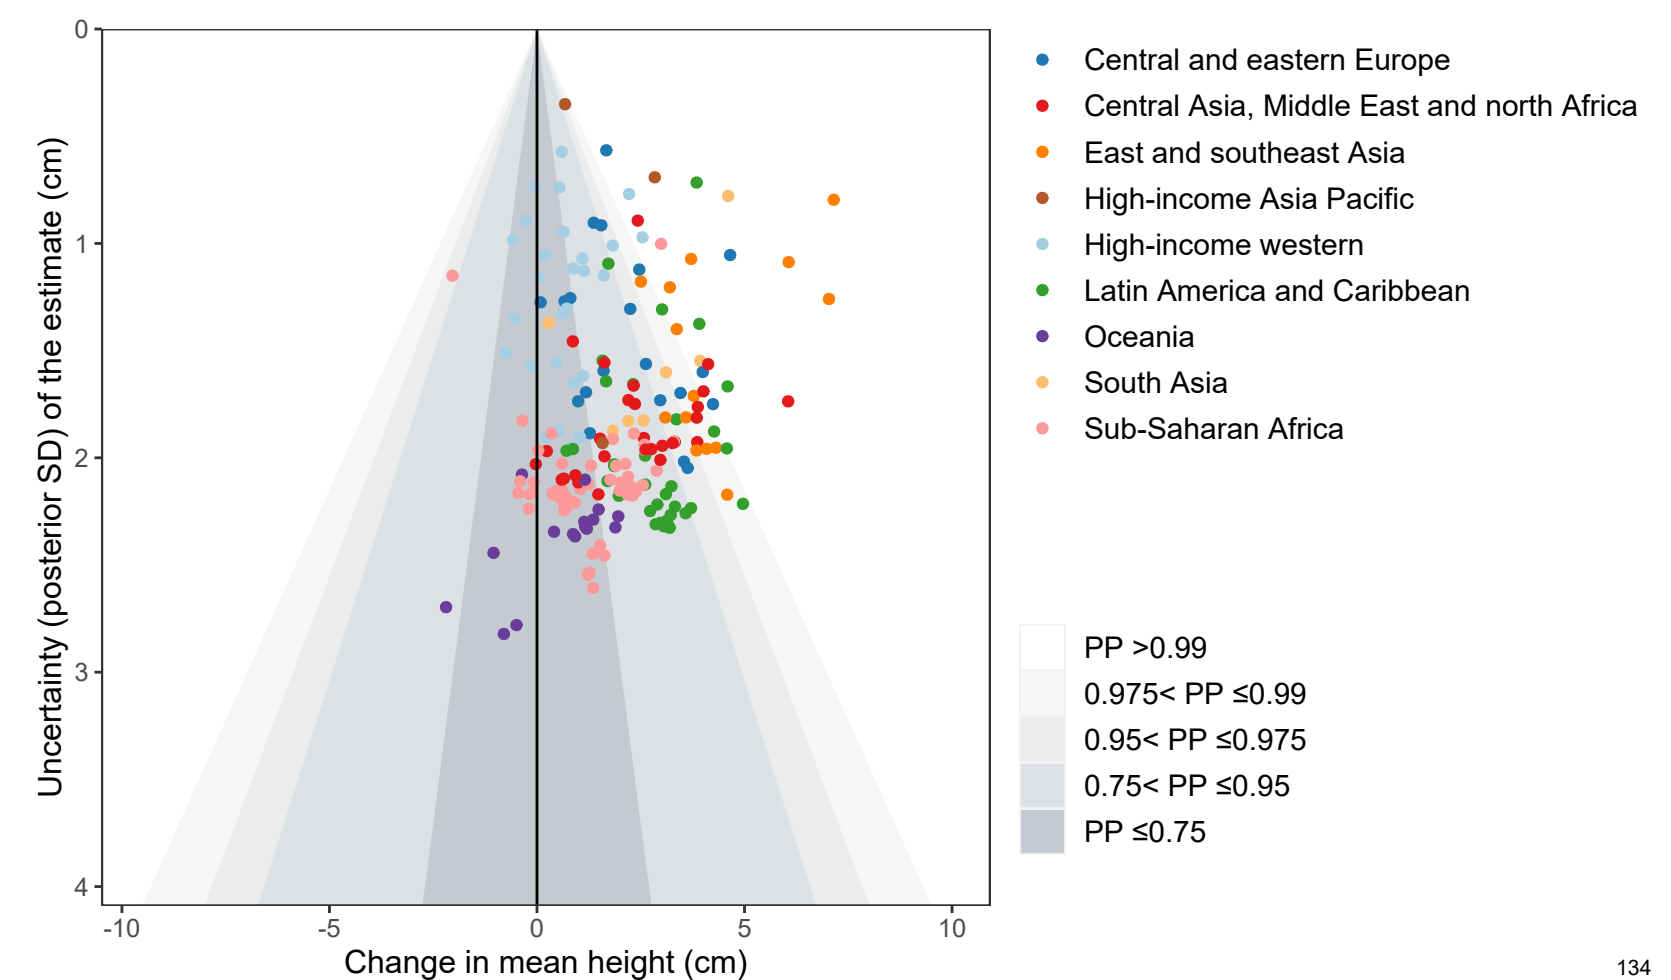



Mean height in 2020 (boys, age 10, rural)

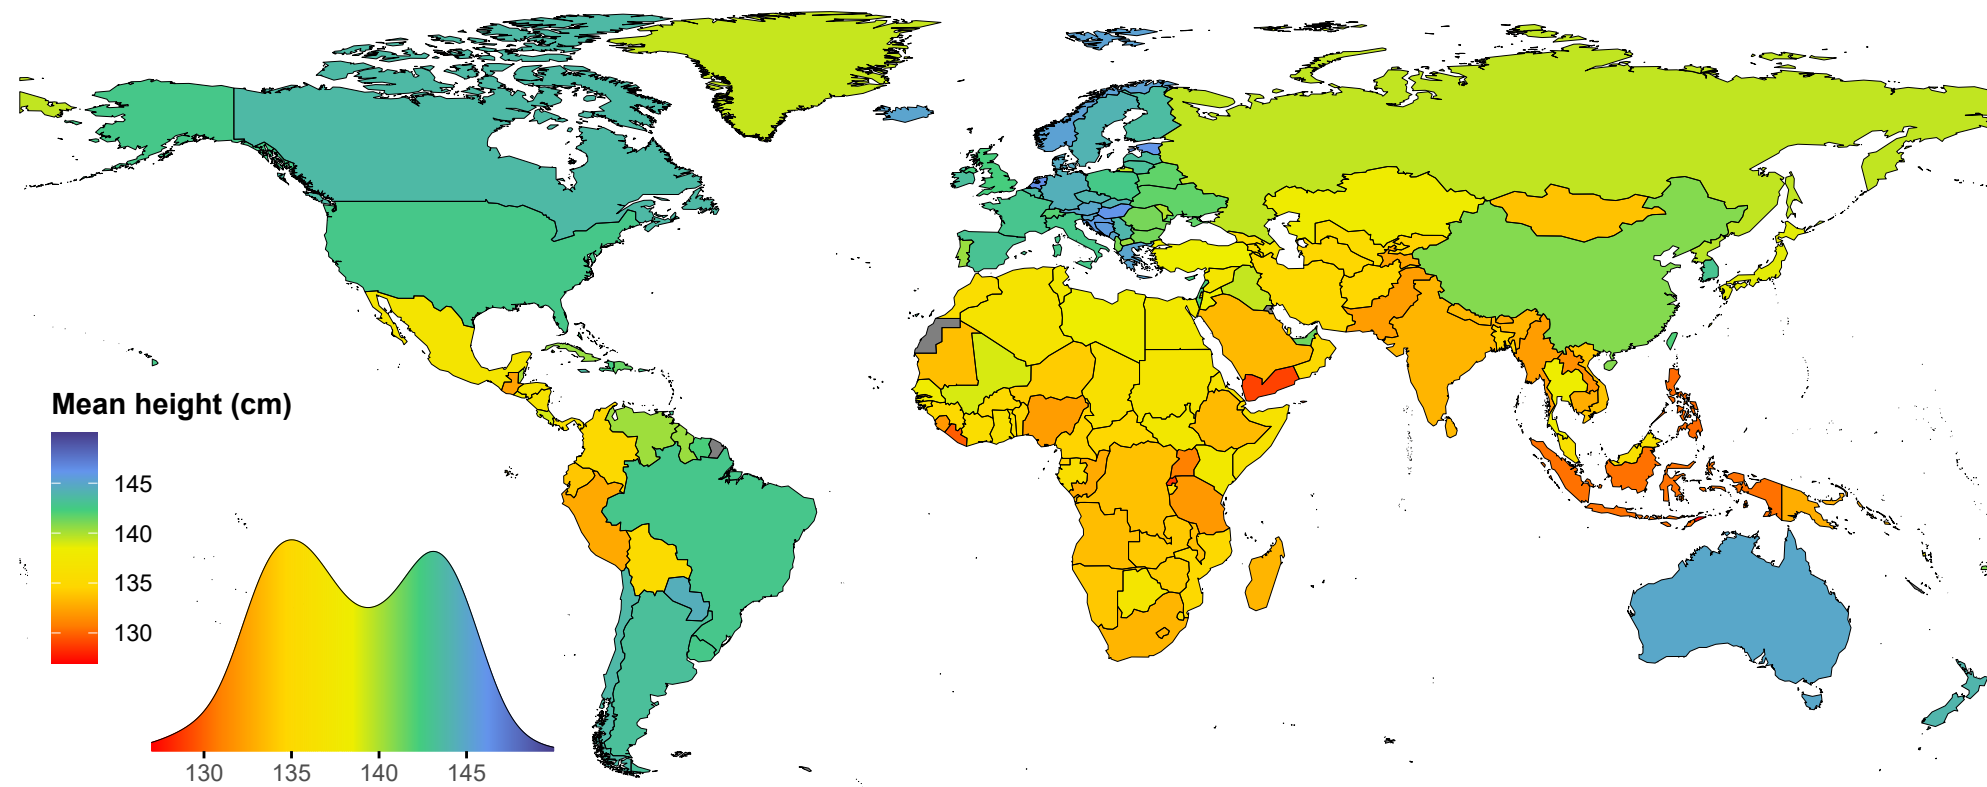

- |                   |                                 |                       |                 |
|-------------------|---------------------------------|-----------------------|-----------------|
| American Samoa    | Fiji                            | Montenegro            | Seychelles      |
| Bahrain           | French Polynesia                | Nauru                 | Solomon Islands |
| Bermuda           | Kiribati                        | Niue                  | Tokelau         |
| Brunei Darussalam | Maldives                        | Palau                 | Tonga           |
| Cape Verde        | Marshall Islands                | Samoa                 | Tuvalu          |
| Comoros           | Mauritius                       | Sao Tome and Principe | Vanuatu         |
| Cook Islands      | Mirconesia, Federated States of |                       |                 |

Change 1990-2020 (boys, age 10, rural)

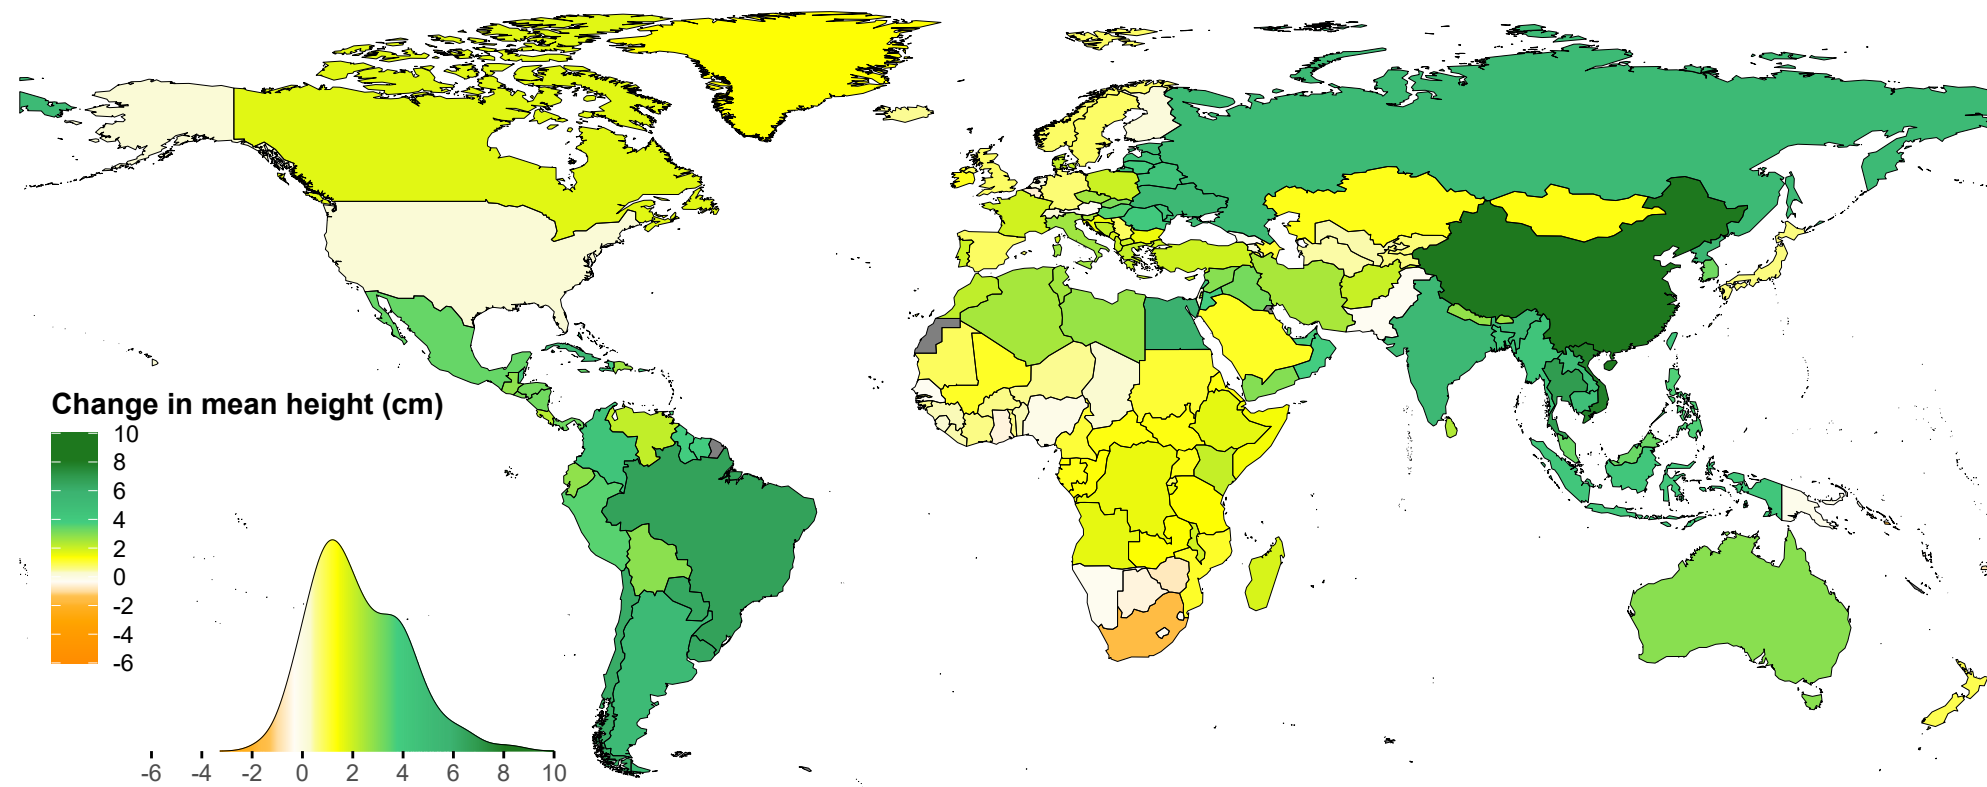

- |                   |                                 |                       |                 |
|-------------------|---------------------------------|-----------------------|-----------------|
| American Samoa    | Fiji                            | Montenegro            | Seychelles      |
| Bahrain           | French Polynesia                | Nauru                 | Solomon Islands |
| Bermuda           | Kiribati                        | Niue                  | Tokelau         |
| Brunei Darussalam | Maldives                        | Palau                 | Tonga           |
| Cape Verde        | Marshall Islands                | Samoa                 | Tuvalu          |
| Comoros           | Mauritius                       | Sao Tome and Principe | Vanuatu         |
| Cook Islands      | Mirconesia, Federated States of |                       |                 |

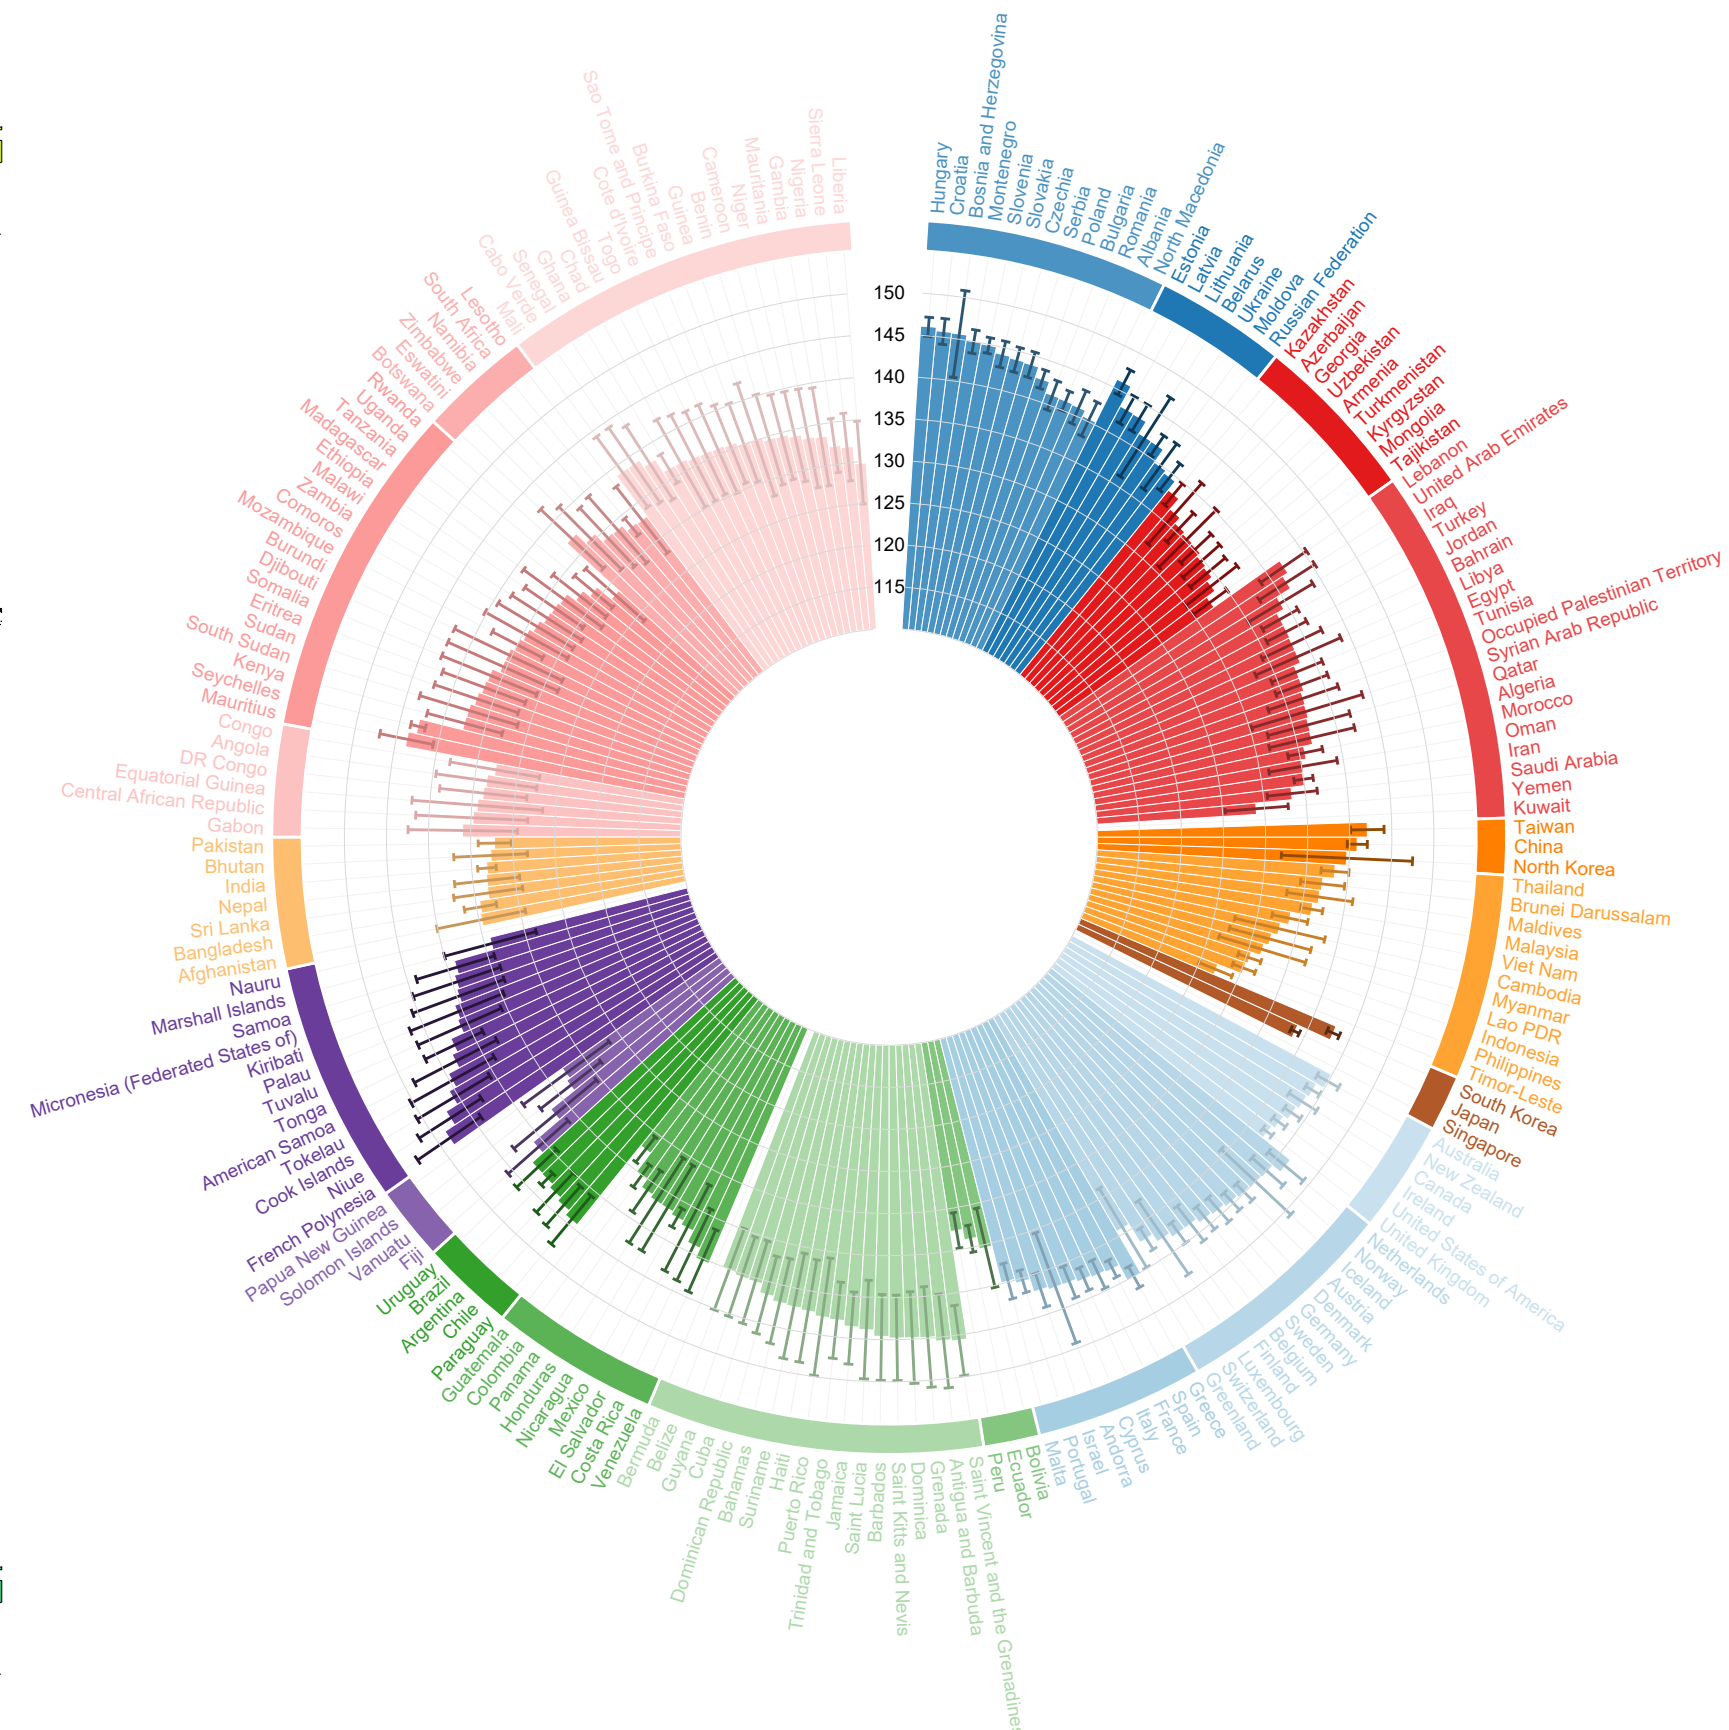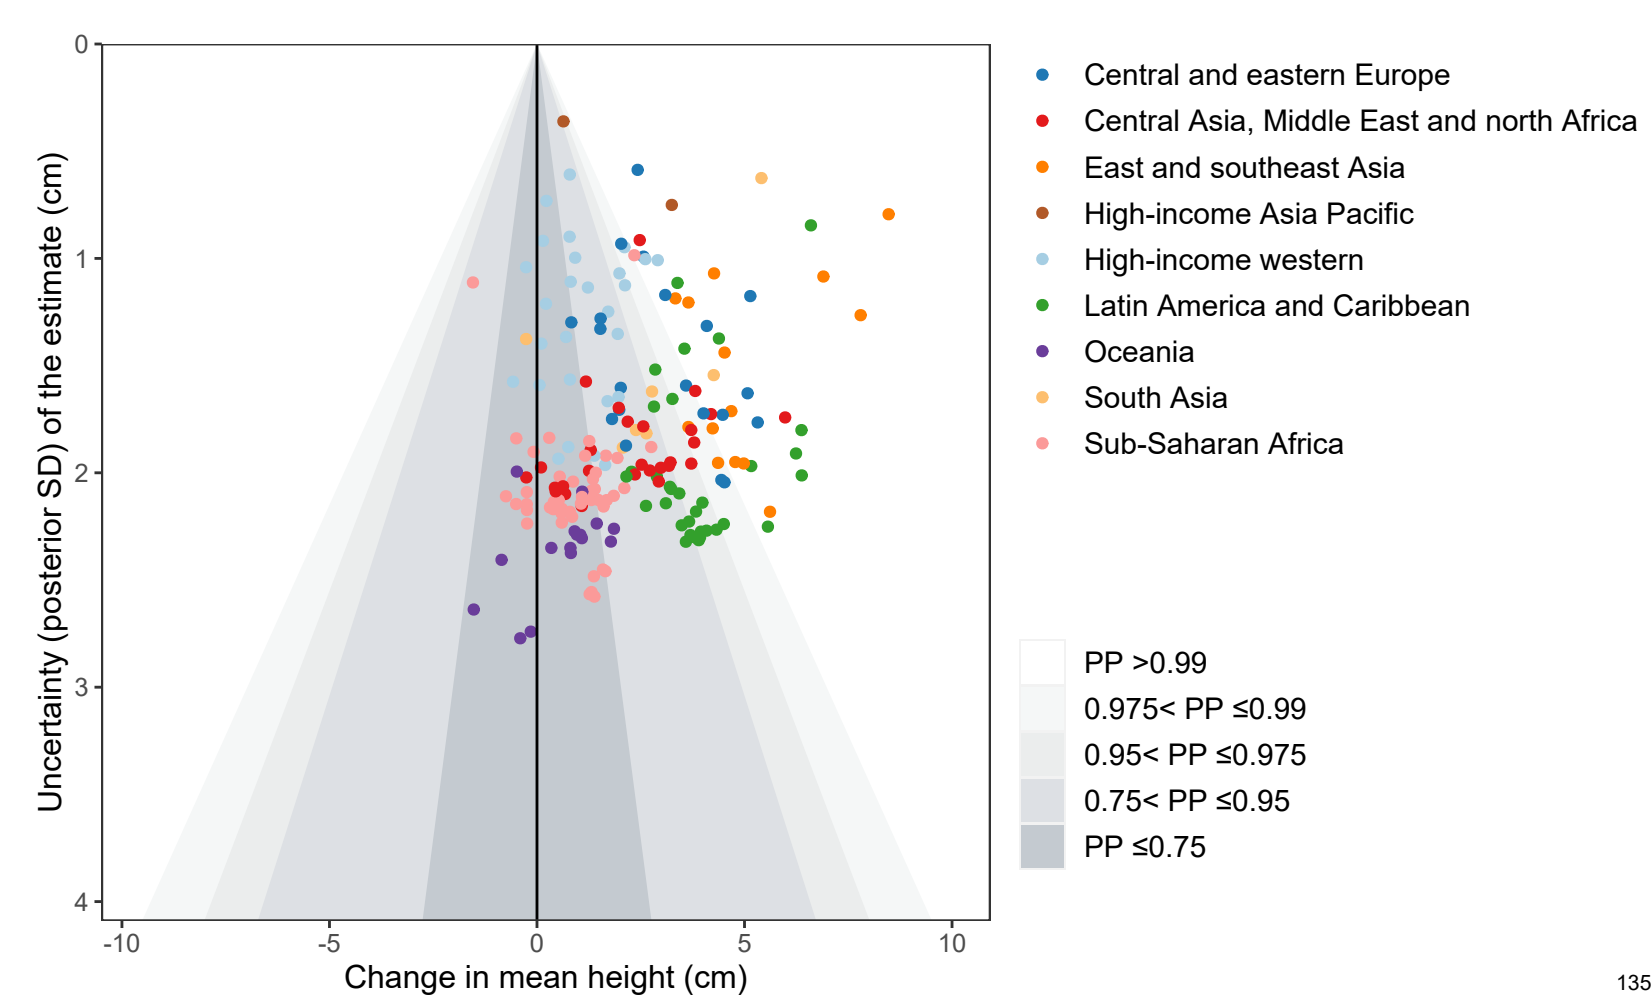



Mean height in 2020 (girls, age 15, urban)

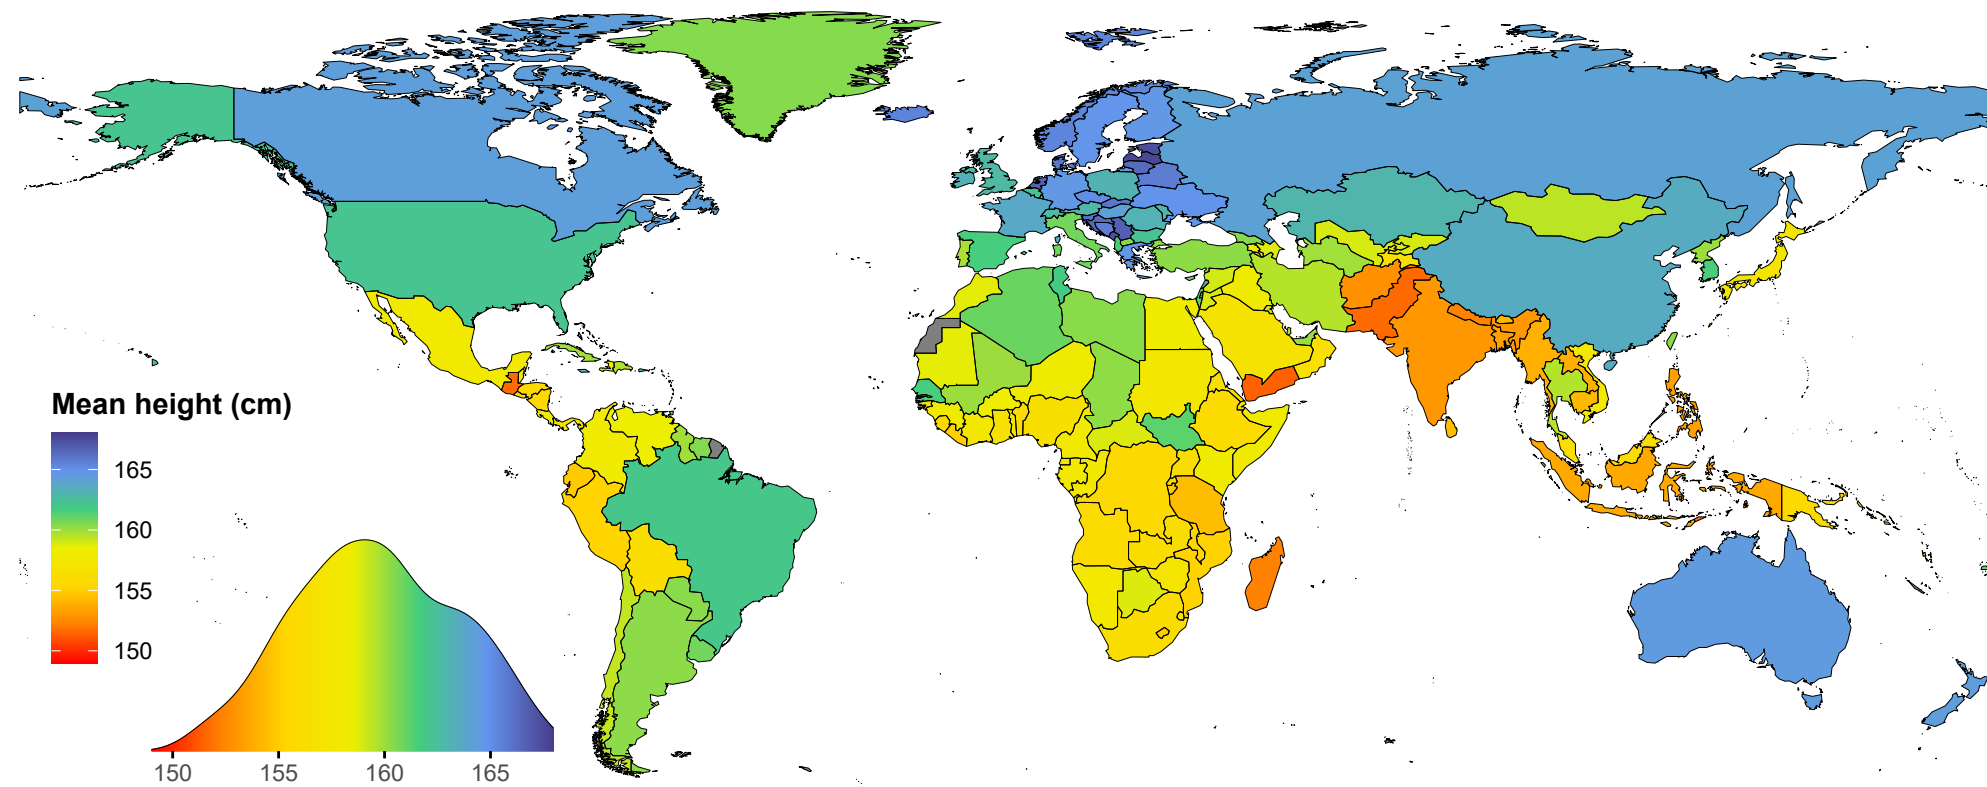

- |                   |                                 |                       |                 |
|-------------------|---------------------------------|-----------------------|-----------------|
| American Samoa    | Fiji                            | Montenegro            | Seychelles      |
| Bahrain           | French Polynesia                | Nauru                 | Solomon Islands |
| Bermuda           | Kiribati                        | Niue                  | Tokelau         |
| Brunei Darussalam | Maldive                         | Palau                 | Tonga           |
| Cape Verde        | Marshall Islands                | Samoa                 | Tuvalu          |
| Comoros           | Mauritius                       | Sao Tome and Principe | Vanuatu         |
| Cook Islands      | Mirconesia, Federated States of |                       |                 |

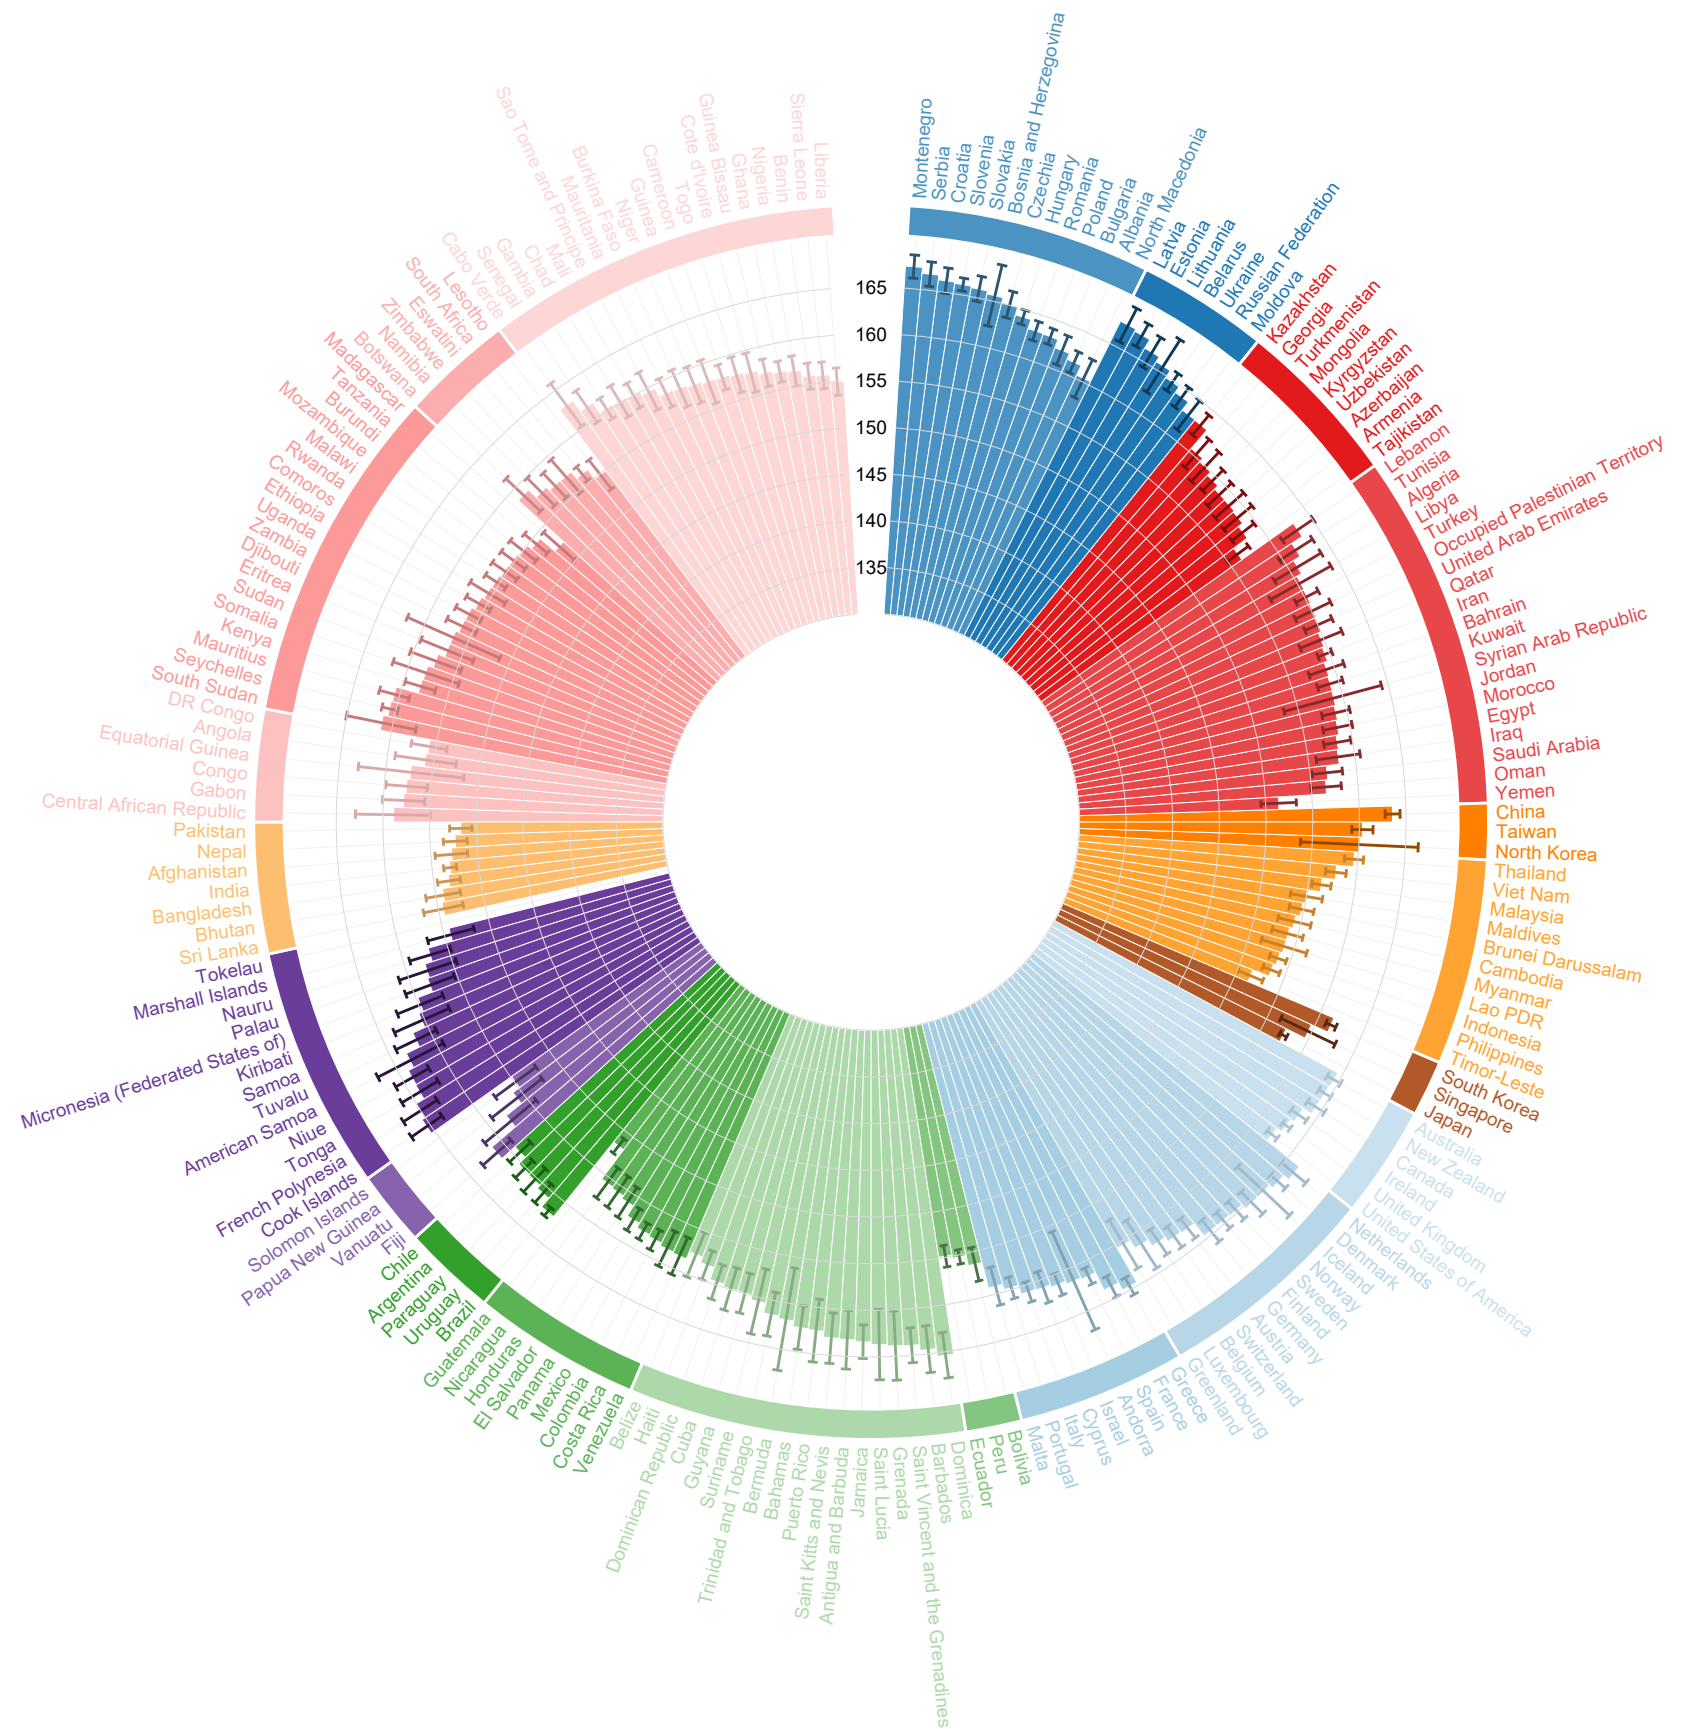

Change 1990-2020 (girls, age 15, urban)

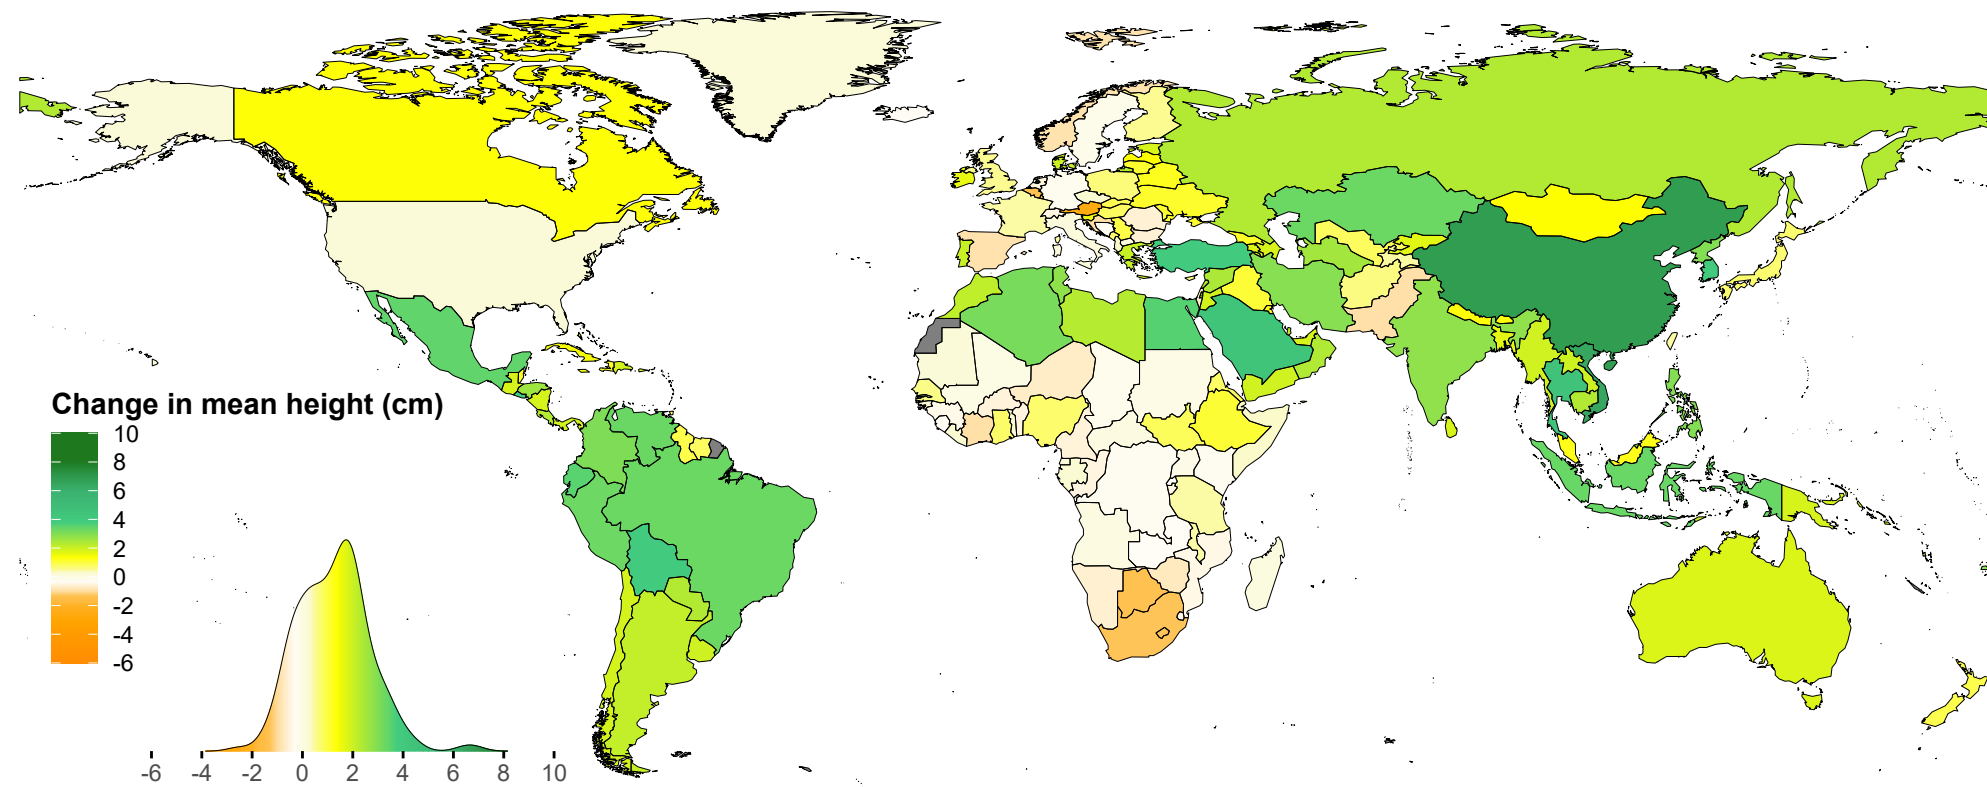

- |                   |                                 |                       |                 |
|-------------------|---------------------------------|-----------------------|-----------------|
| American Samoa    | Fiji                            | Montenegro            | Seychelles      |
| Bahrain           | French Polynesia                | Nauru                 | Solomon Islands |
| Bermuda           | Kiribati                        | Niue                  | Tokelau         |
| Brunei Darussalam | Maldive                         | Palau                 | Tonga           |
| Cape Verde        | Marshall Islands                | Samoa                 | Tuvalu          |
| Comoros           | Mauritius                       | Sao Tome and Principe | Vanuatu         |
| Cook Islands      | Mirconesia, Federated States of |                       |                 |

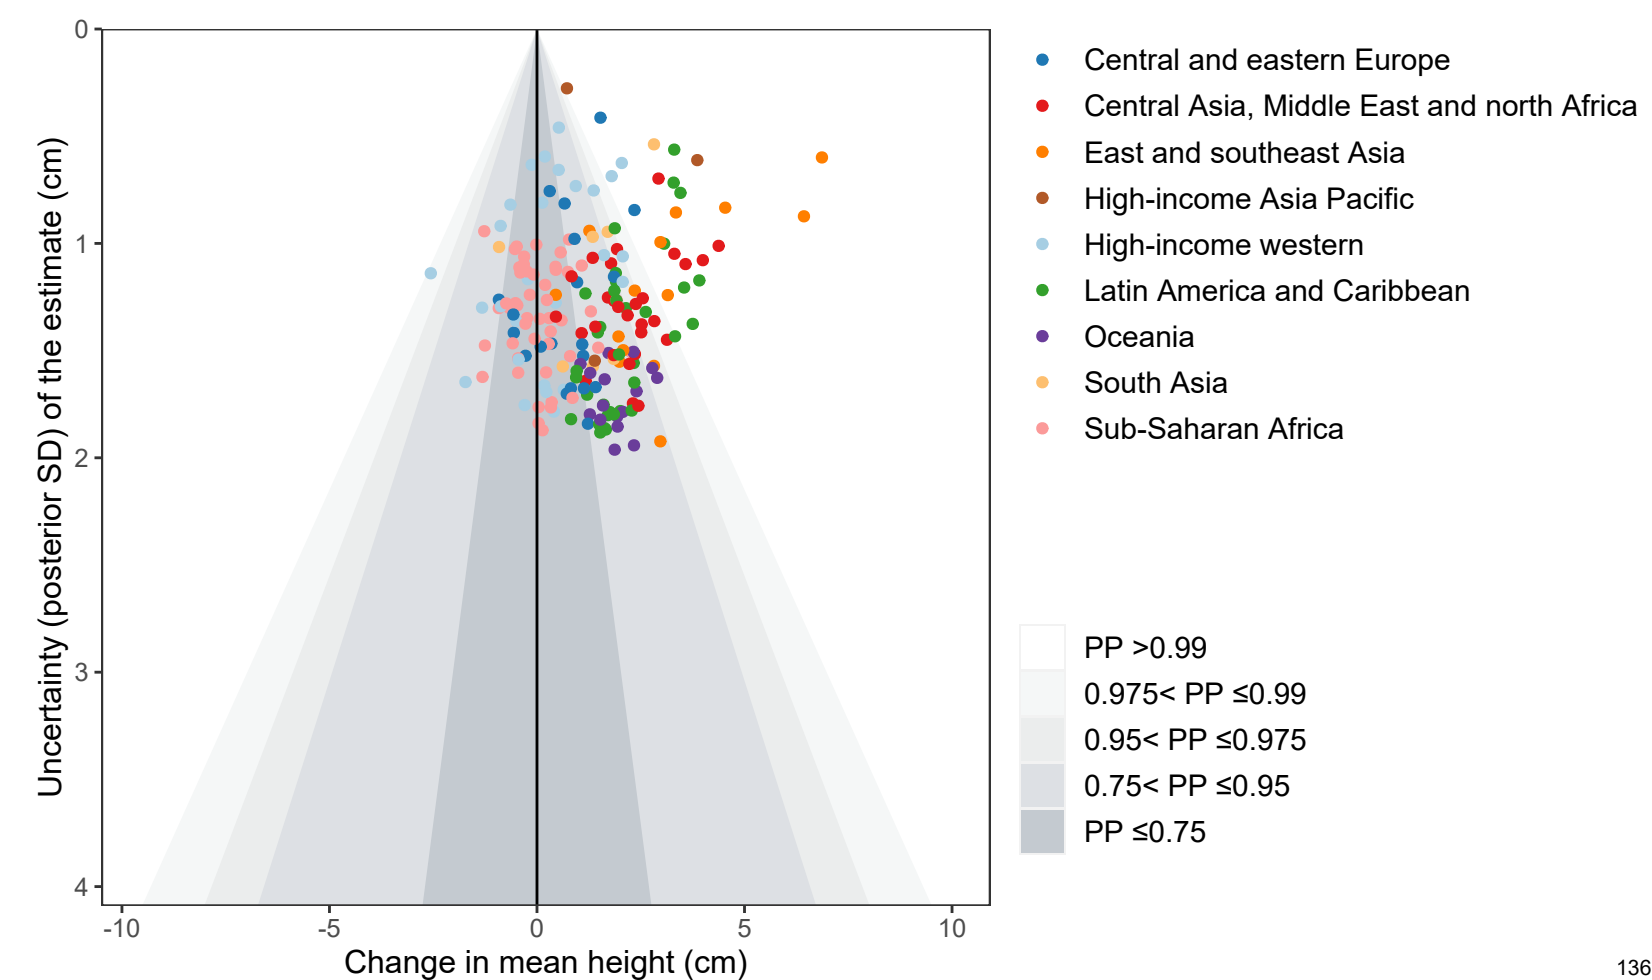



Mean height in 2020 (girls, age 15, rural)

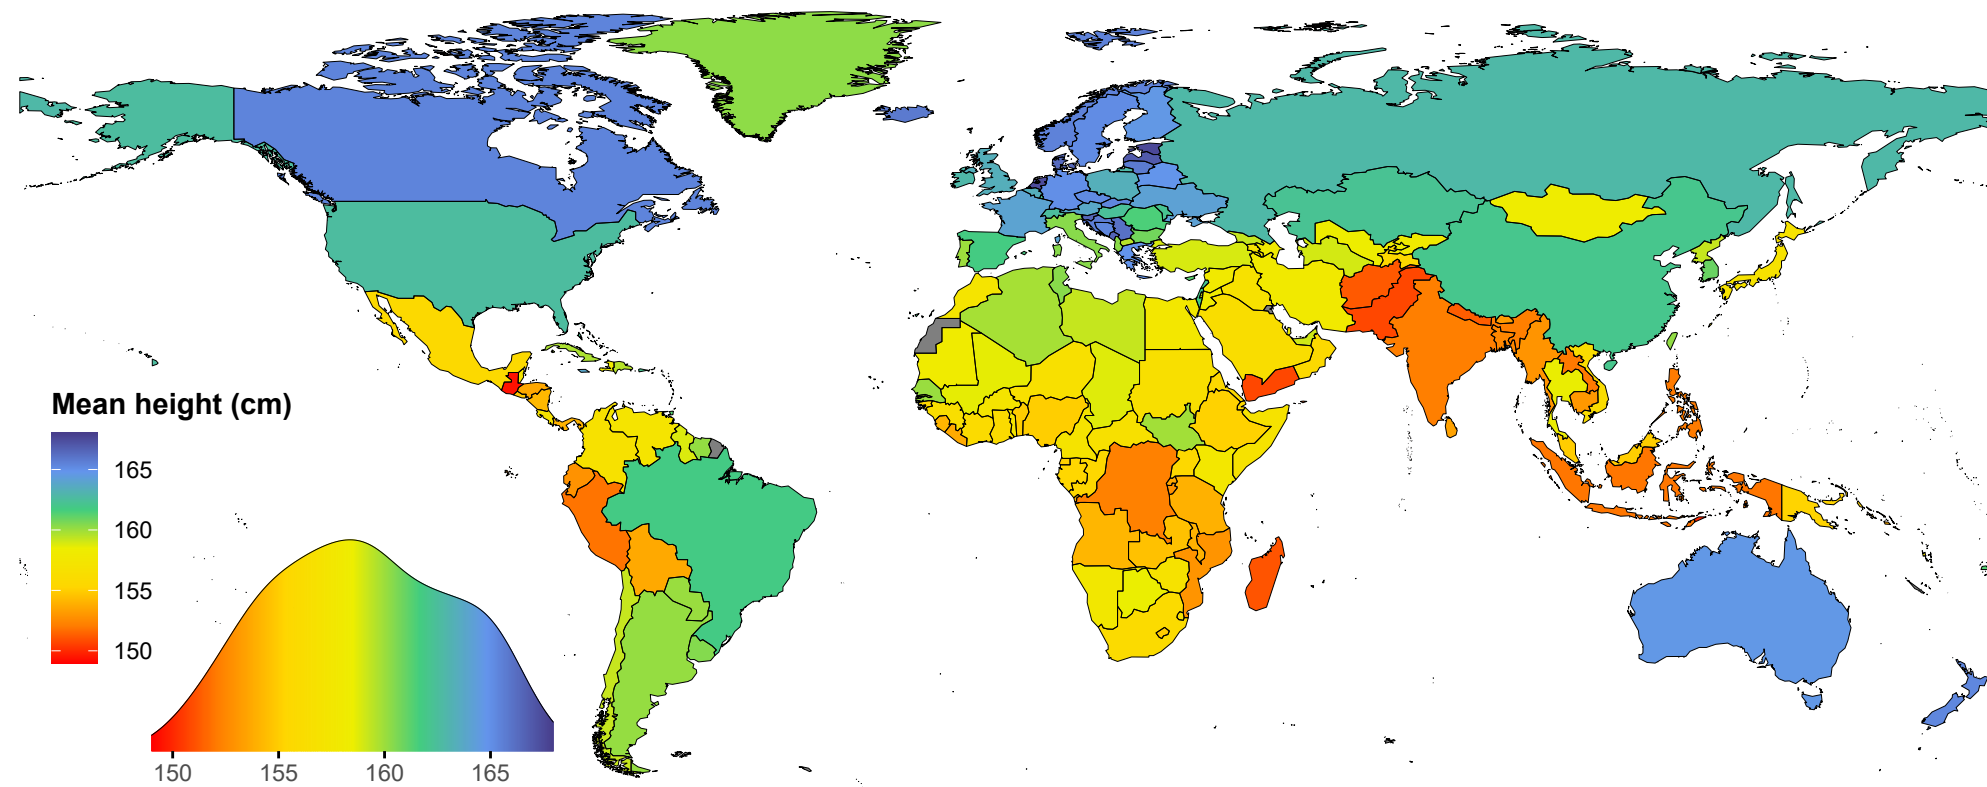

- |                   |                                 |                       |                 |
|-------------------|---------------------------------|-----------------------|-----------------|
| American Samoa    | Fiji                            | Montenegro            | Seychelles      |
| Bahrain           | French Polynesia                | Nauru                 | Solomon Islands |
| Bermuda           | Kiribati                        | Niue                  | Tokelau         |
| Brunei Darussalam | Maldives                        | Palau                 | Tonga           |
| Cape Verde        | Marshall Islands                | Samoa                 | Tuvalu          |
| Comoros           | Mauritius                       | Sao Tome and Principe | Vanuatu         |
| Cook Islands      | Mirconesia, Federated States of |                       |                 |

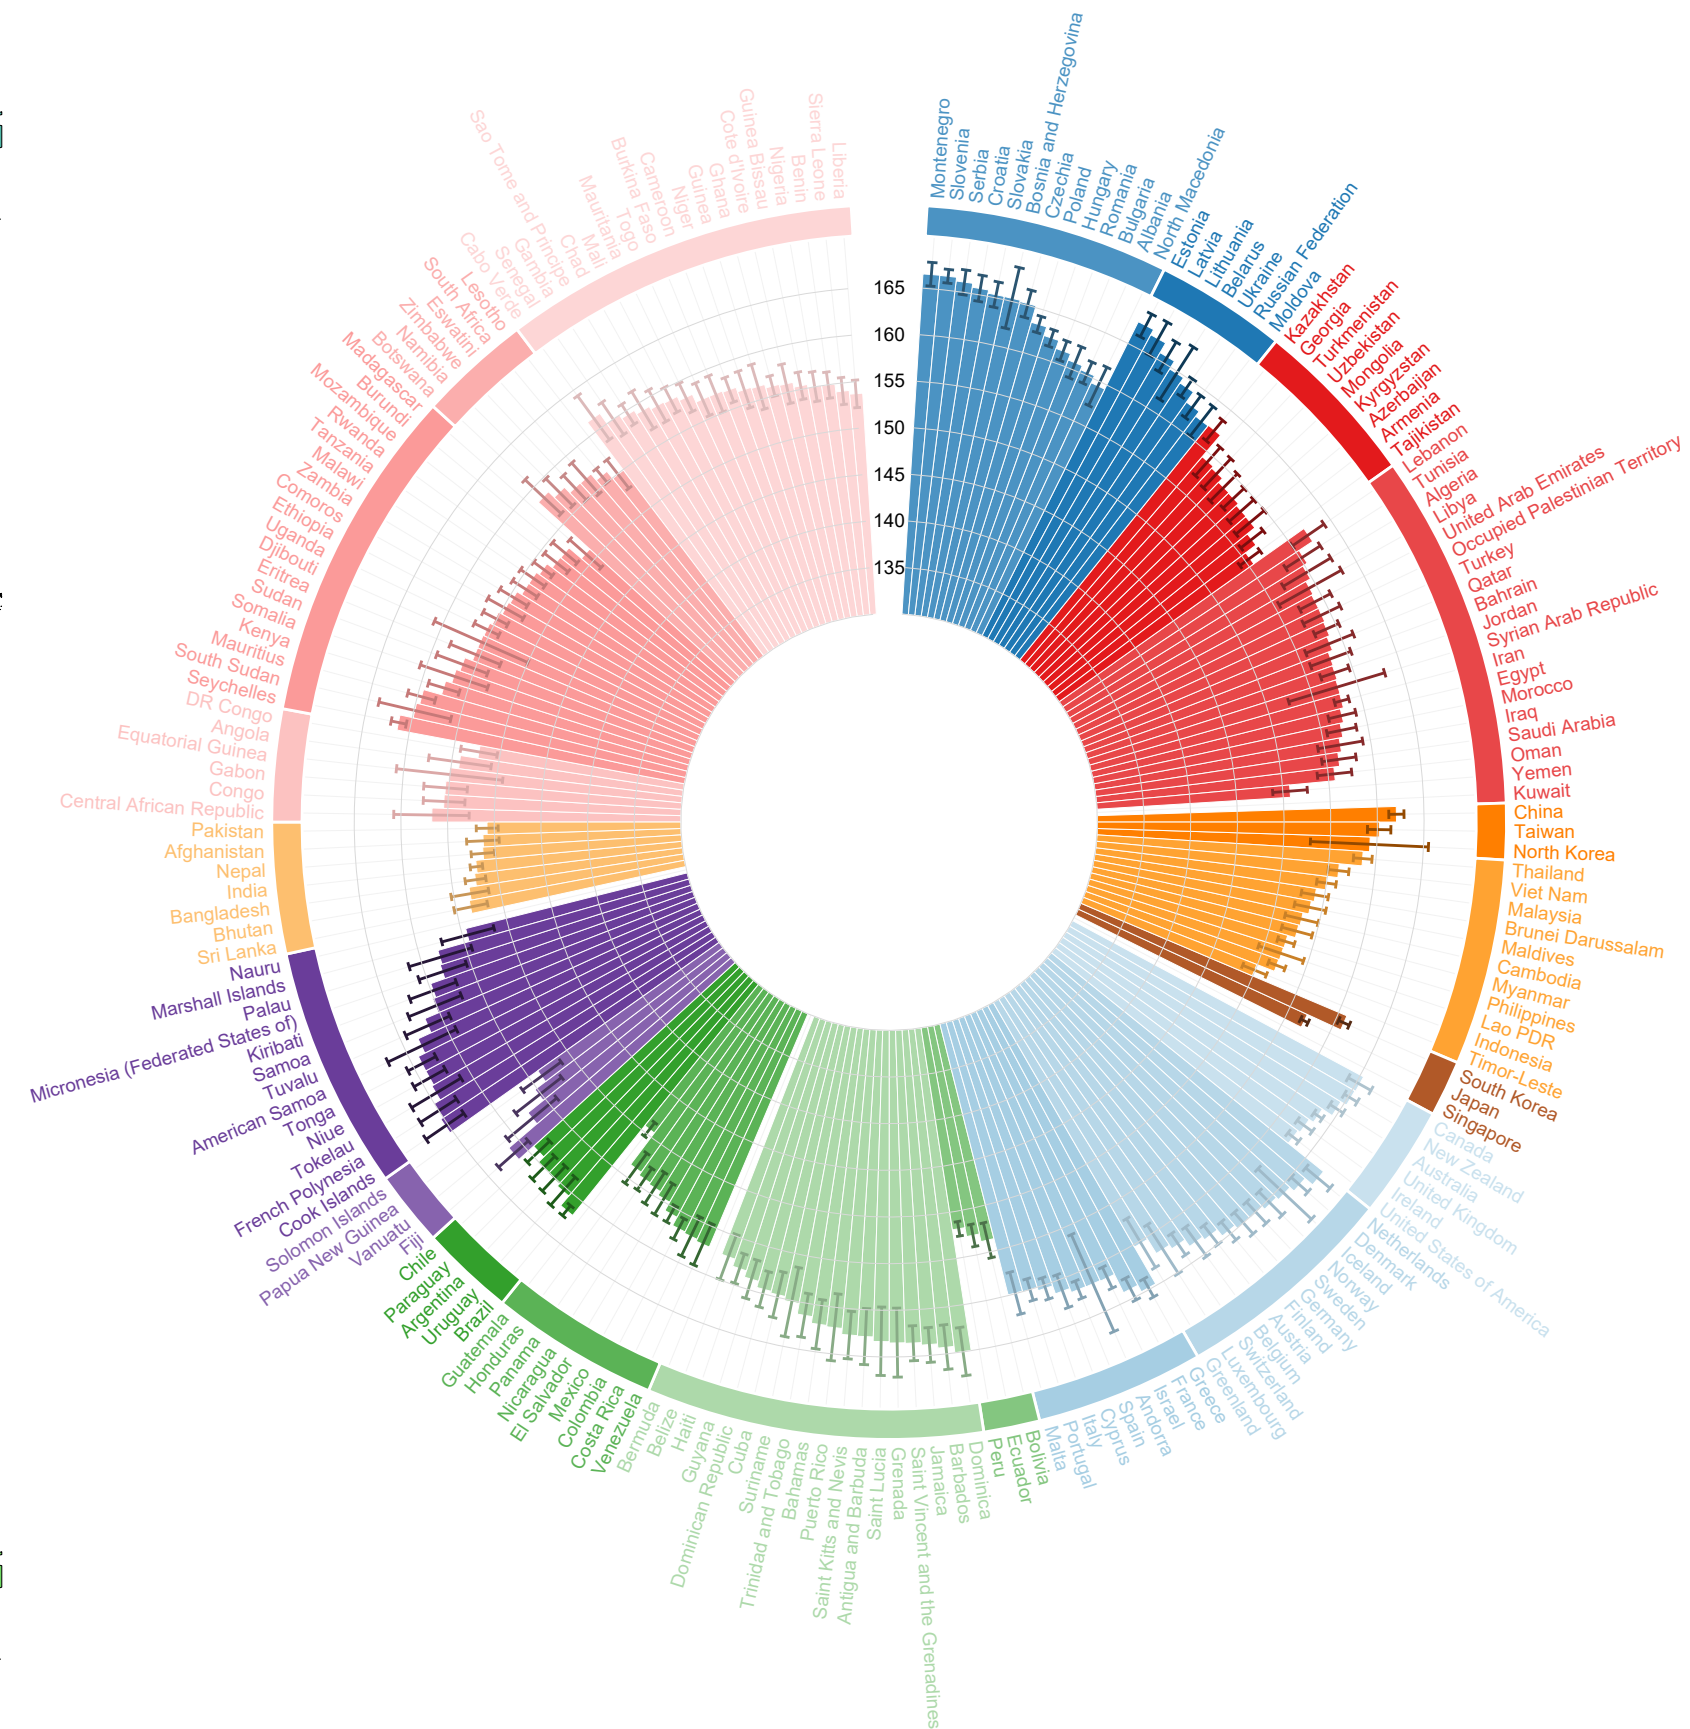

Change 1990-2020 (girls, age 15, rural)

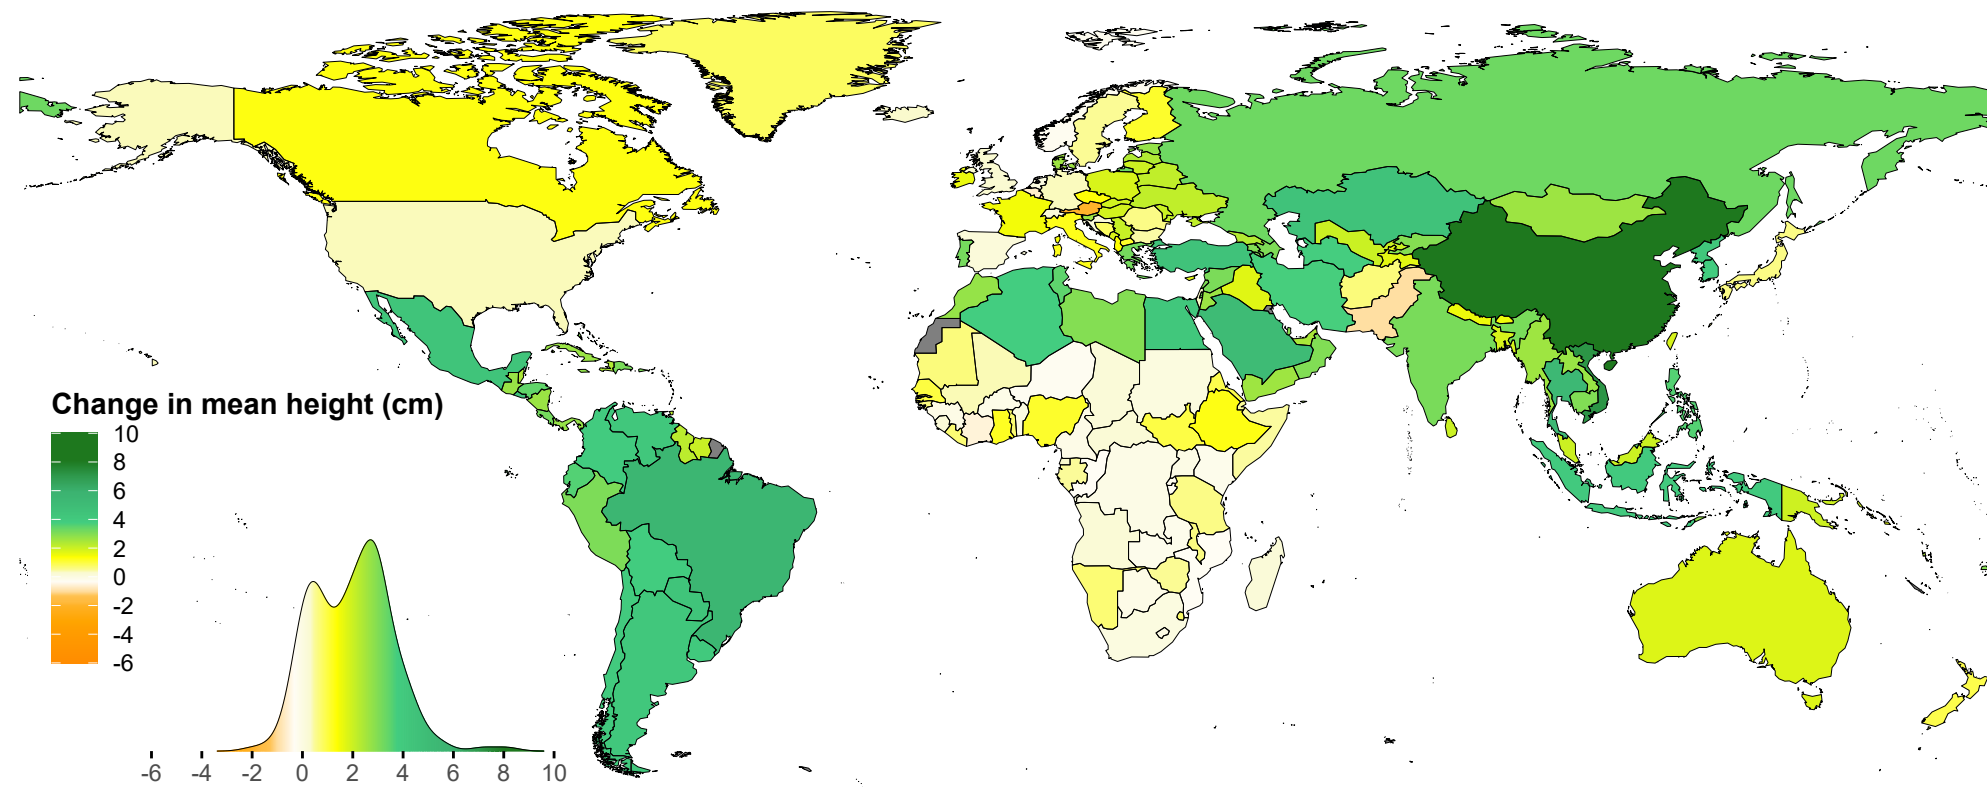

- |                   |                                 |                       |                 |
|-------------------|---------------------------------|-----------------------|-----------------|
| American Samoa    | Fiji                            | Montenegro            | Seychelles      |
| Bahrain           | French Polynesia                | Nauru                 | Solomon Islands |
| Bermuda           | Kiribati                        | Niue                  | Tokelau         |
| Brunei Darussalam | Maldives                        | Palau                 | Tonga           |
| Cape Verde        | Marshall Islands                | Samoa                 | Tuvalu          |
| Comoros           | Mauritius                       | Sao Tome and Principe | Vanuatu         |
| Cook Islands      | Mirconesia, Federated States of |                       |                 |

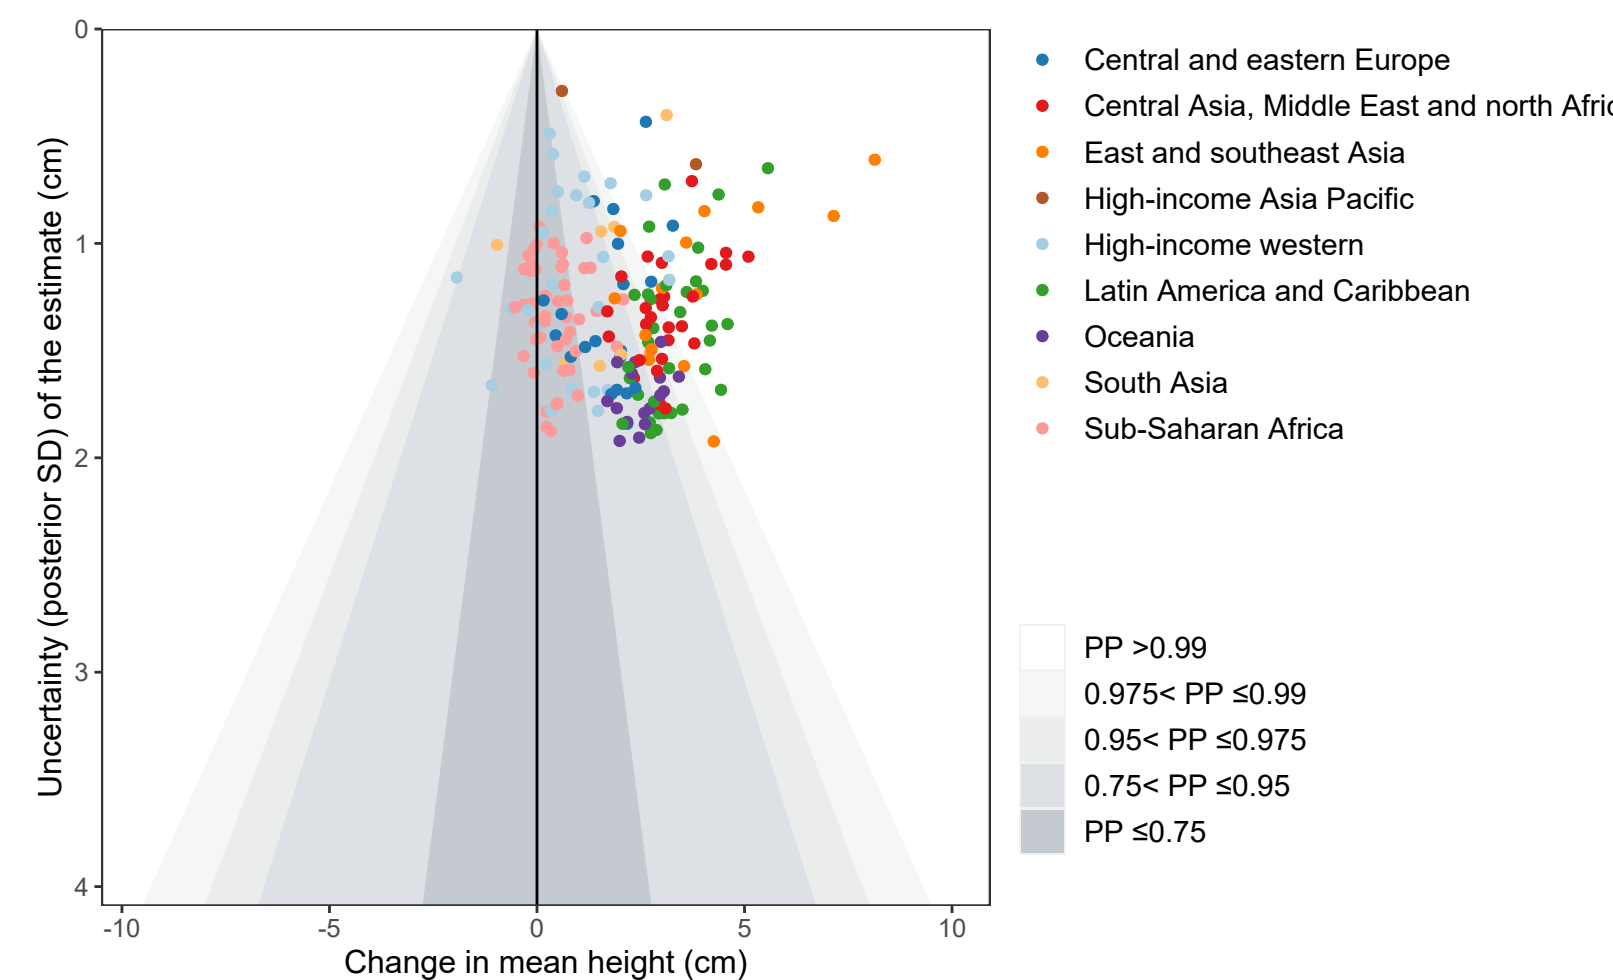



Mean height in 2020 (boys, age 15, urban)

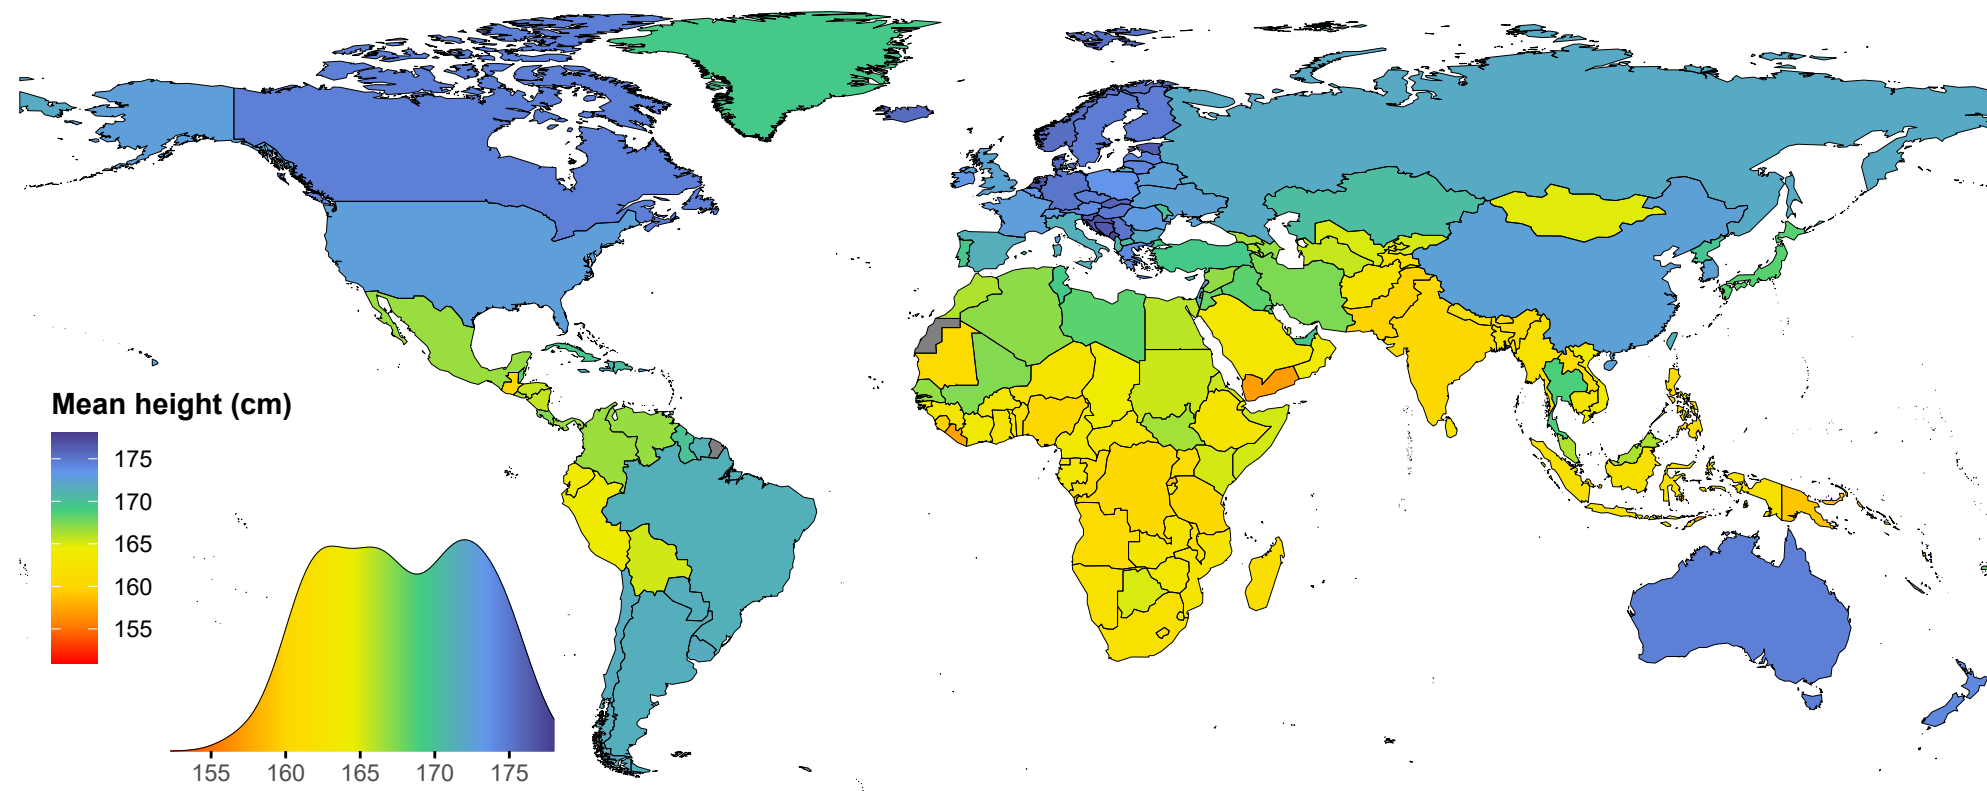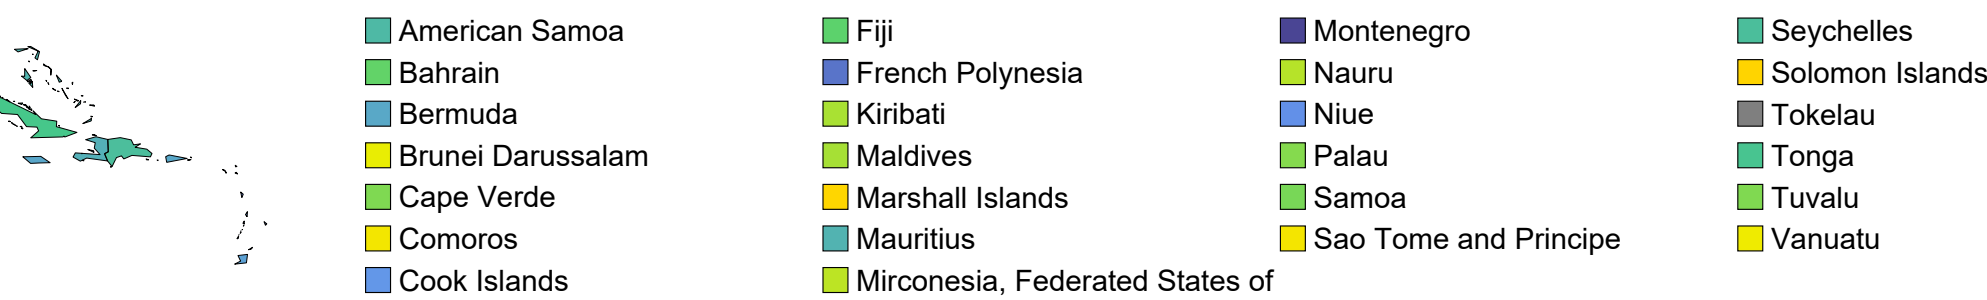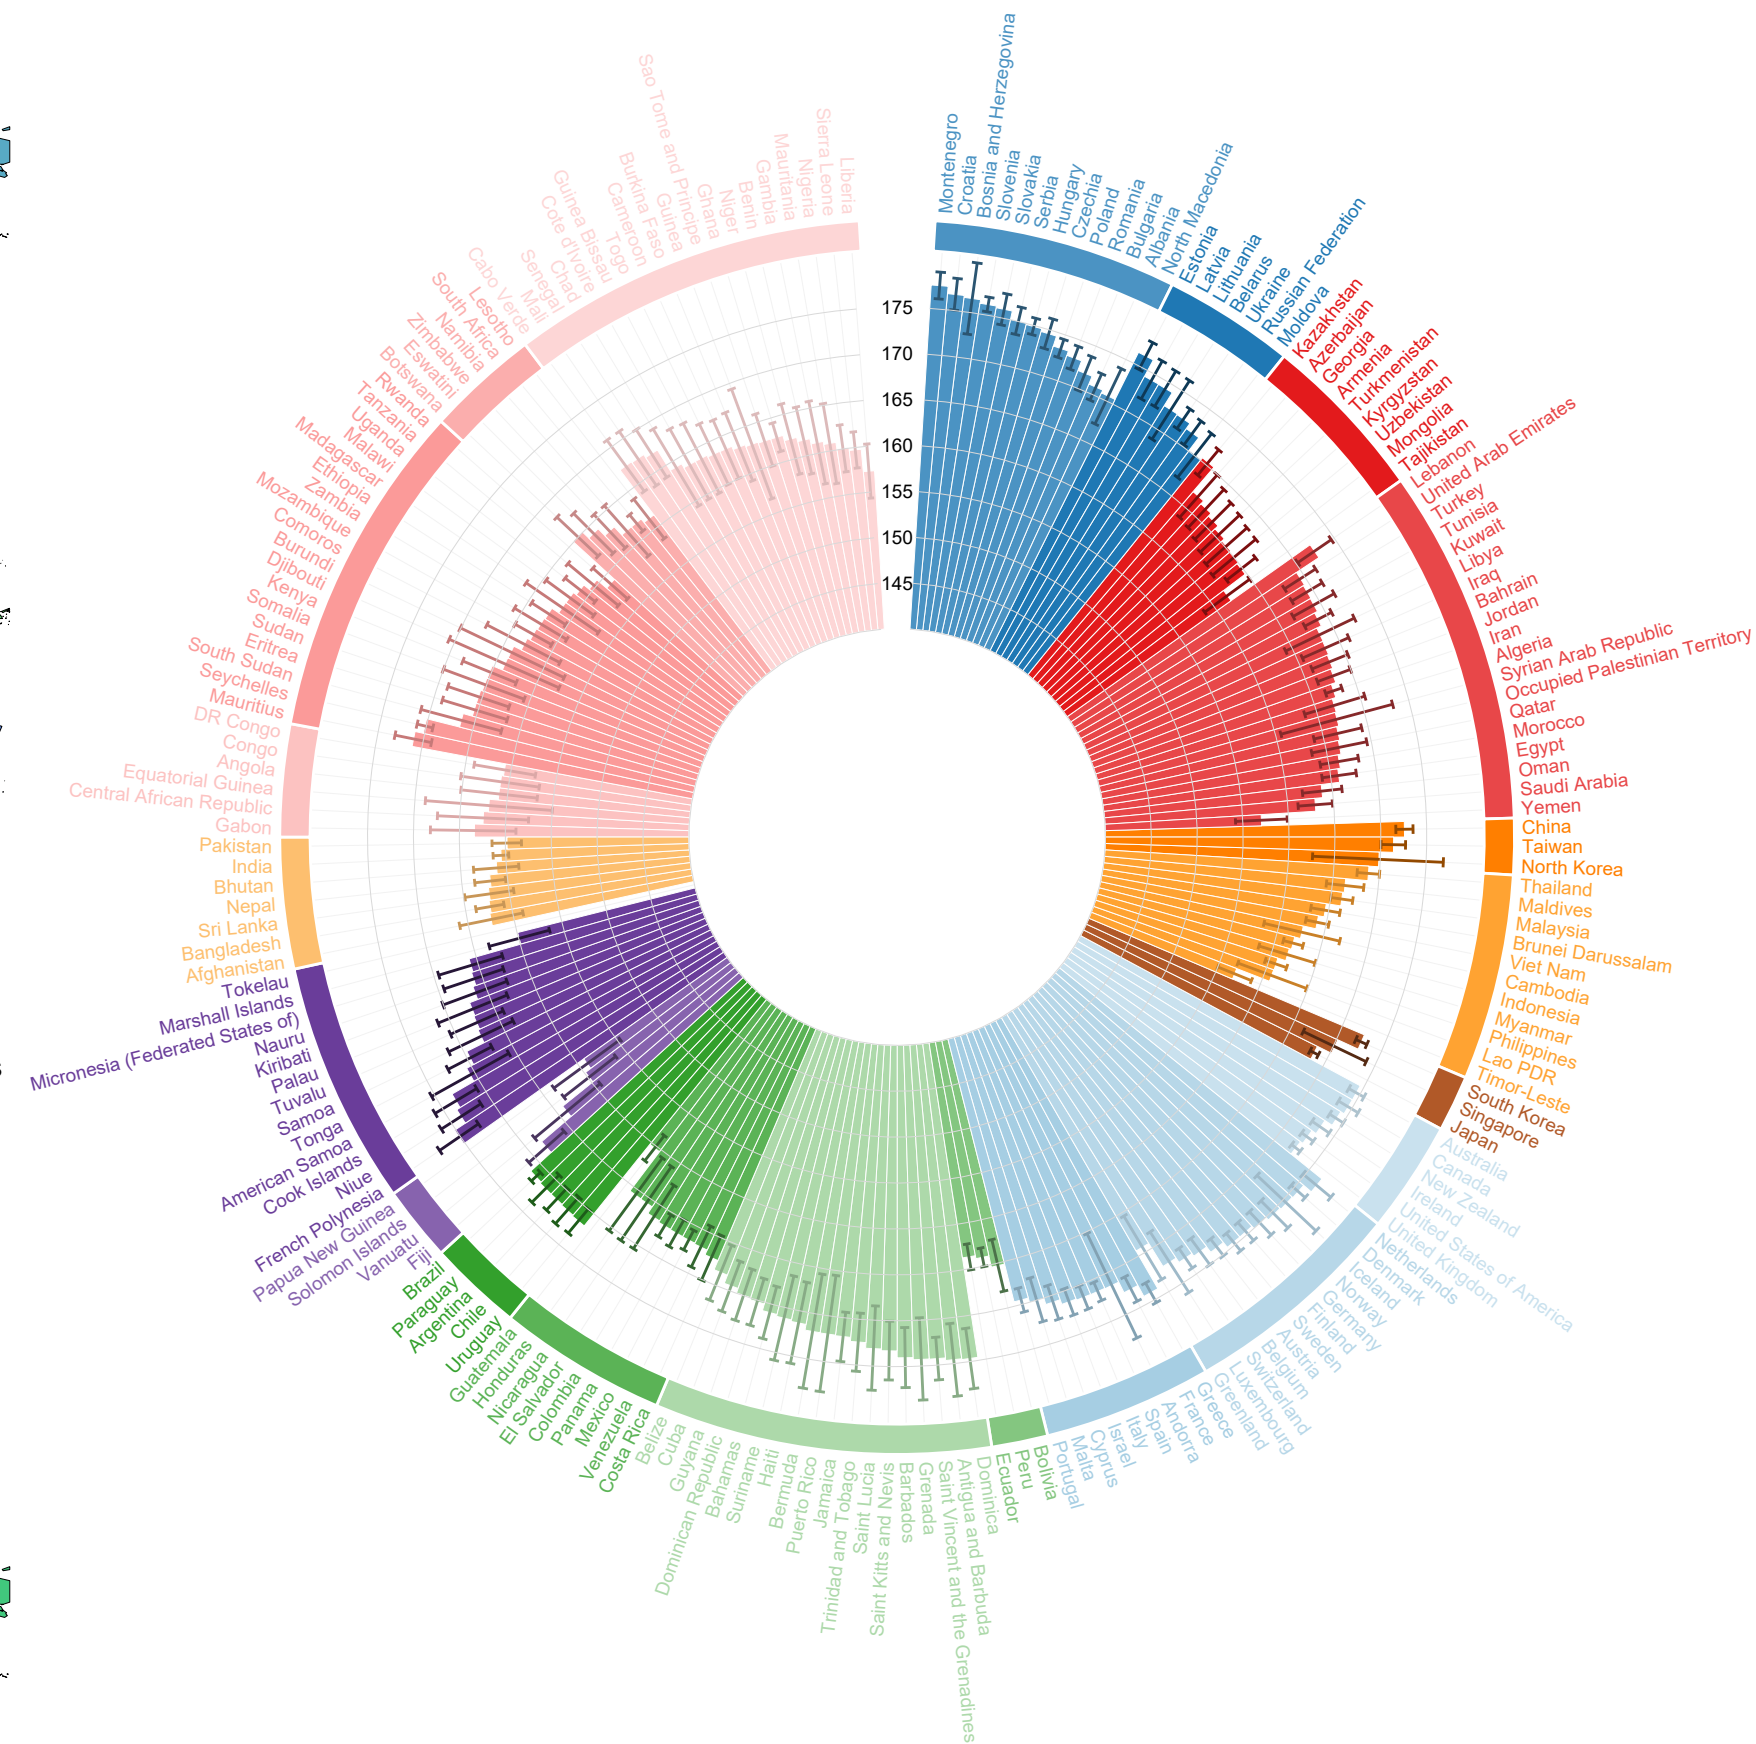

Change 1990-2020 (boys, age 15, urban)

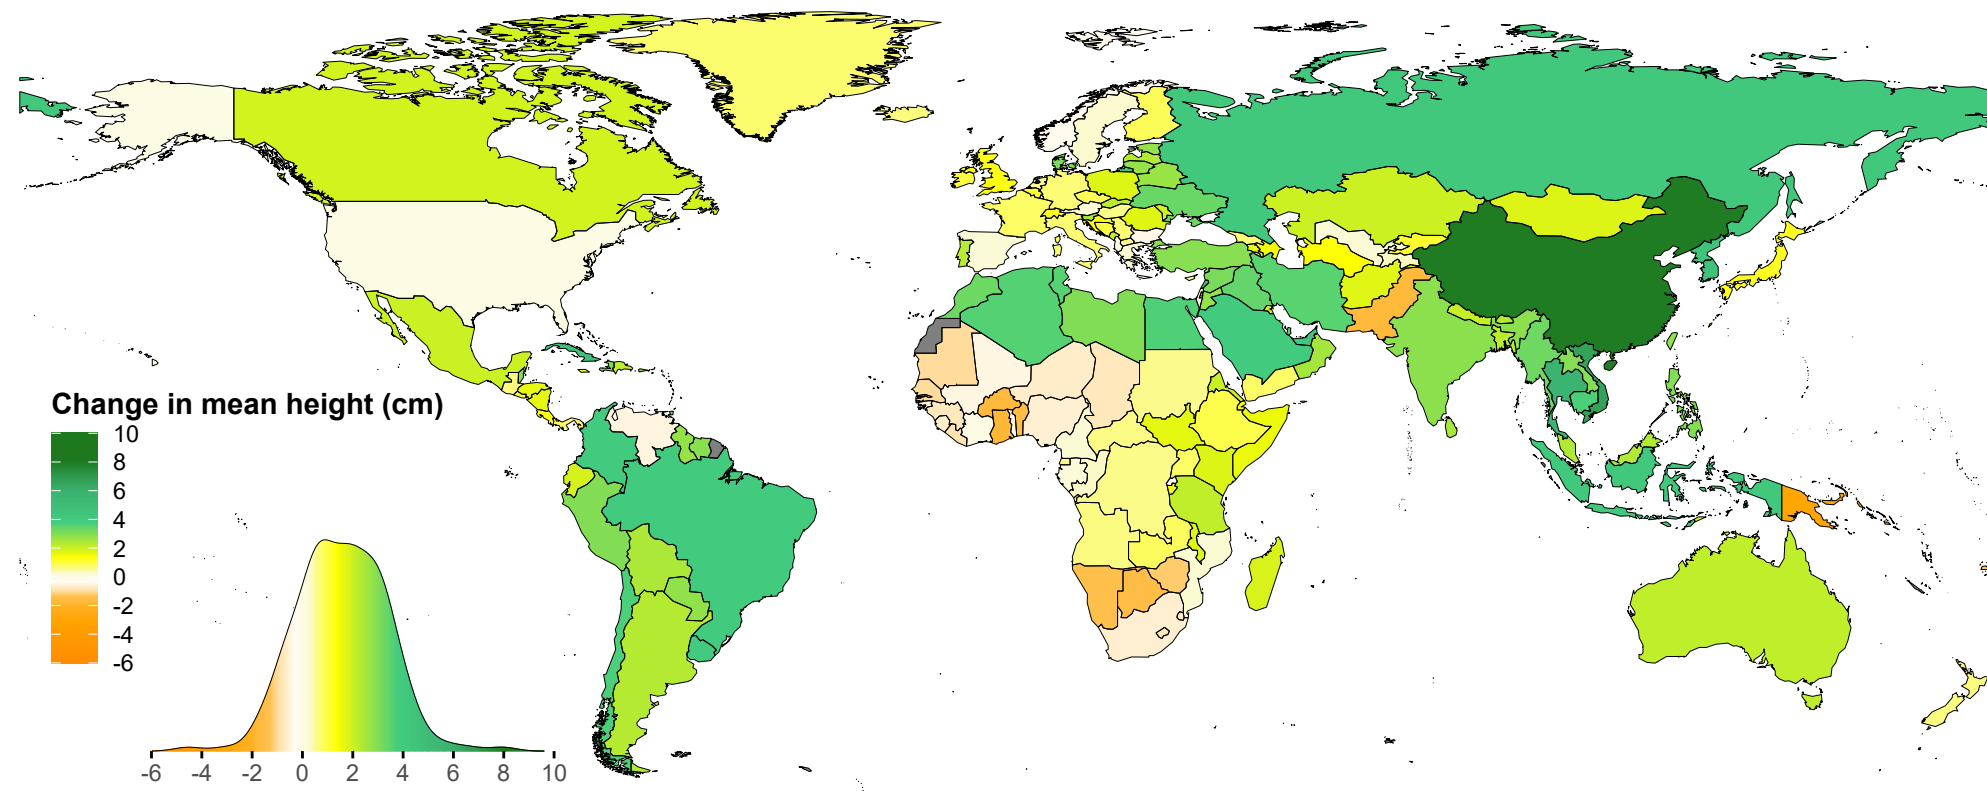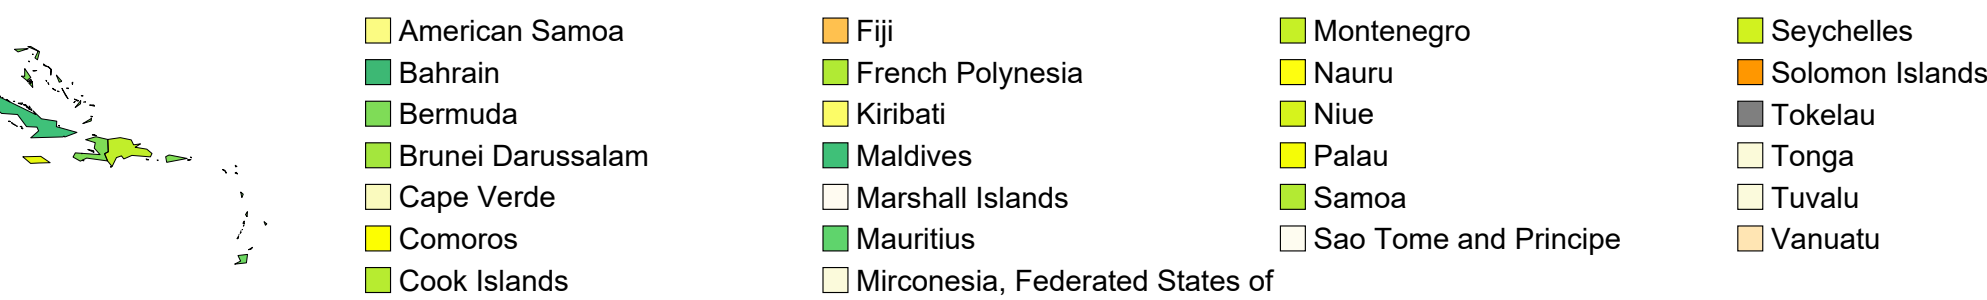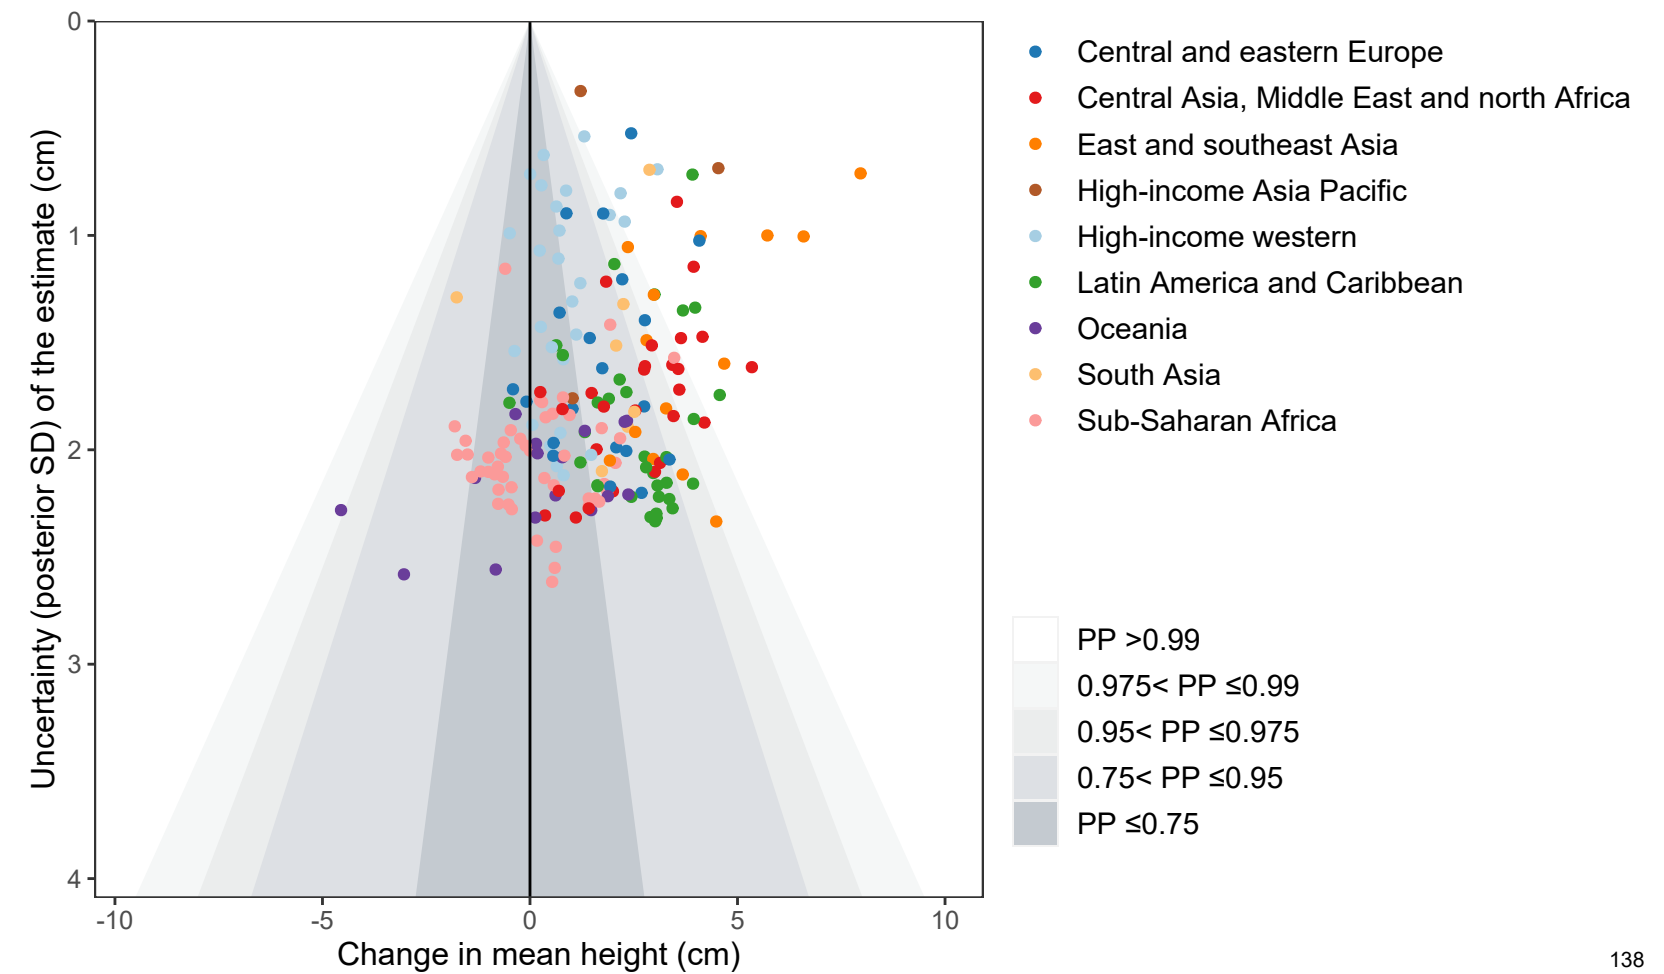



Mean height in 2020 (boys, age 15, rural)

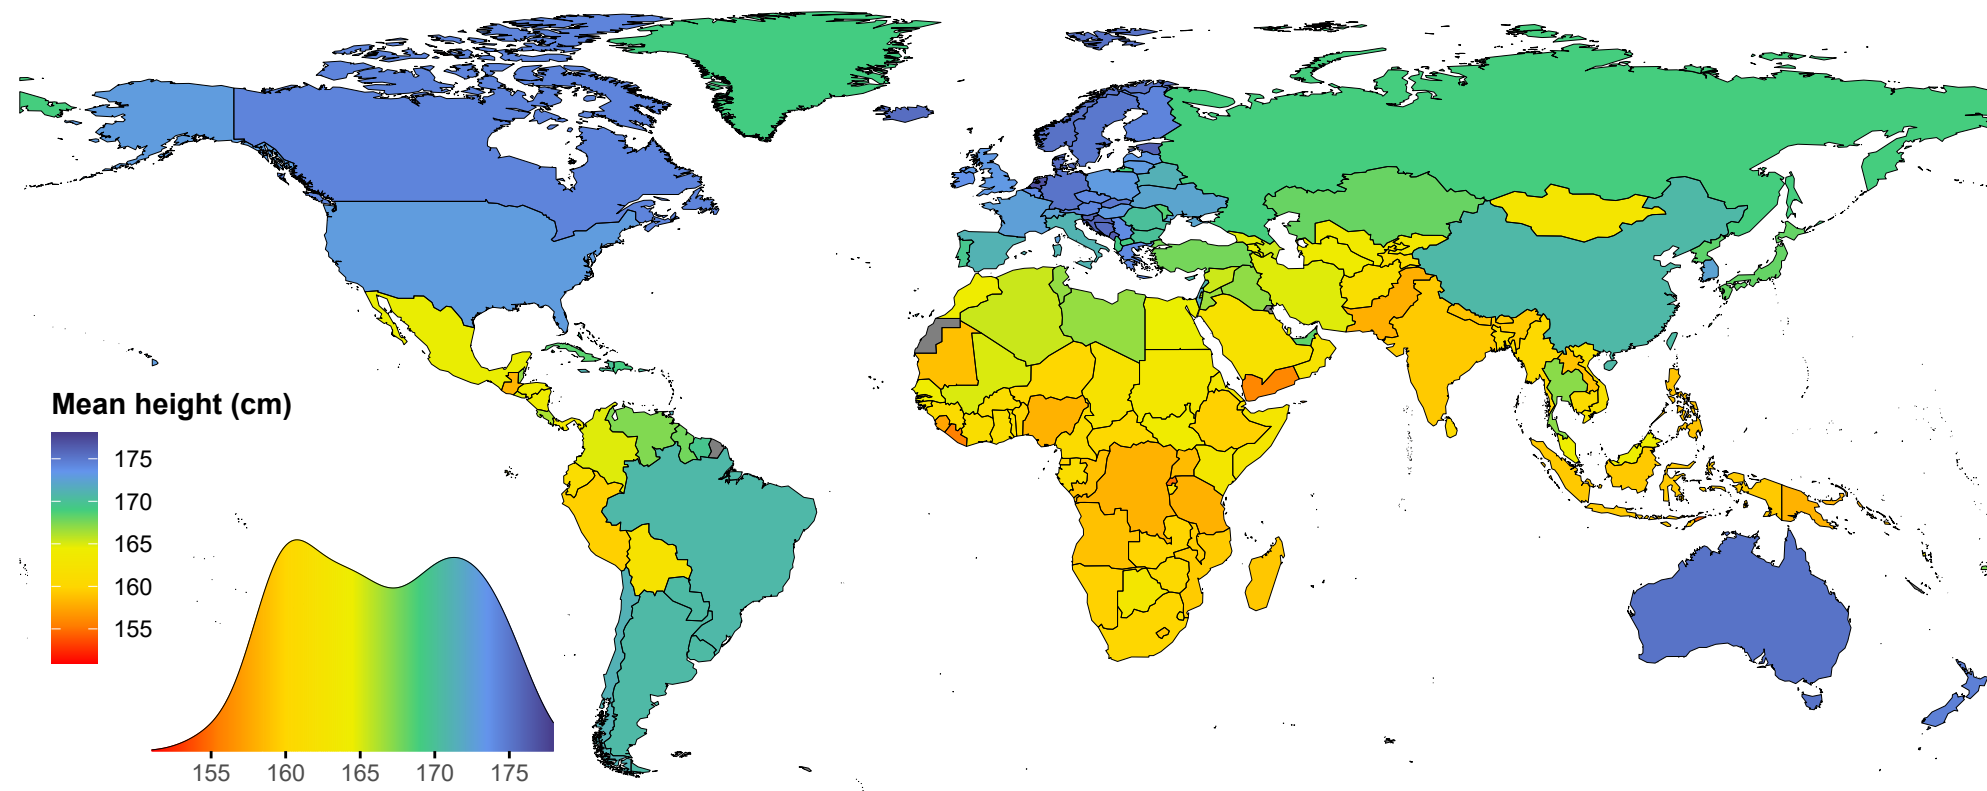

- |                                                          |                                                                        |                                                              |                                                        |
|----------------------------------------------------------|------------------------------------------------------------------------|--------------------------------------------------------------|--------------------------------------------------------|
| <span style="color: #4682B4;">■</span> American Samoa    | <span style="color: #3CB371;">■</span> Fiji                            | <span style="color: #191970;">■</span> Montenegro            | <span style="color: #4682B4;">■</span> Seychelles      |
| <span style="color: #90EE90;">■</span> Bahrain           | <span style="color: #4169E1;">■</span> French Polynesia                | <span style="color: #696969;">■</span> Nauru                 | <span style="color: #FFD700;">■</span> Solomon Islands |
| <span style="color: #696969;">■</span> Bermuda           | <span style="color: #9ACD32;">■</span> Kiribati                        | <span style="color: #4682B4;">■</span> Niue                  | <span style="color: #4682B4;">■</span> Tokelau         |
| <span style="color: #FFD700;">■</span> Brunei Darussalam | <span style="color: #9ACD32;">■</span> Maldives                        | <span style="color: #90EE90;">■</span> Palau                 | <span style="color: #3CB371;">■</span> Tonga           |
| <span style="color: #9ACD32;">■</span> Cape Verde        | <span style="color: #FFA500;">■</span> Marshall Islands                | <span style="color: #90EE90;">■</span> Samoa                 | <span style="color: #90EE90;">■</span> Tuvalu          |
| <span style="color: #FFA500;">■</span> Comoros           | <span style="color: #3CB371;">■</span> Mauritius                       | <span style="color: #FFD700;">■</span> Sao Tome and Principe | <span style="color: #FFD700;">■</span> Vanuatu         |
| <span style="color: #4682B4;">■</span> Cook Islands      | <span style="color: #9ACD32;">■</span> Mirconesia, Federated States of |                                                              |                                                        |

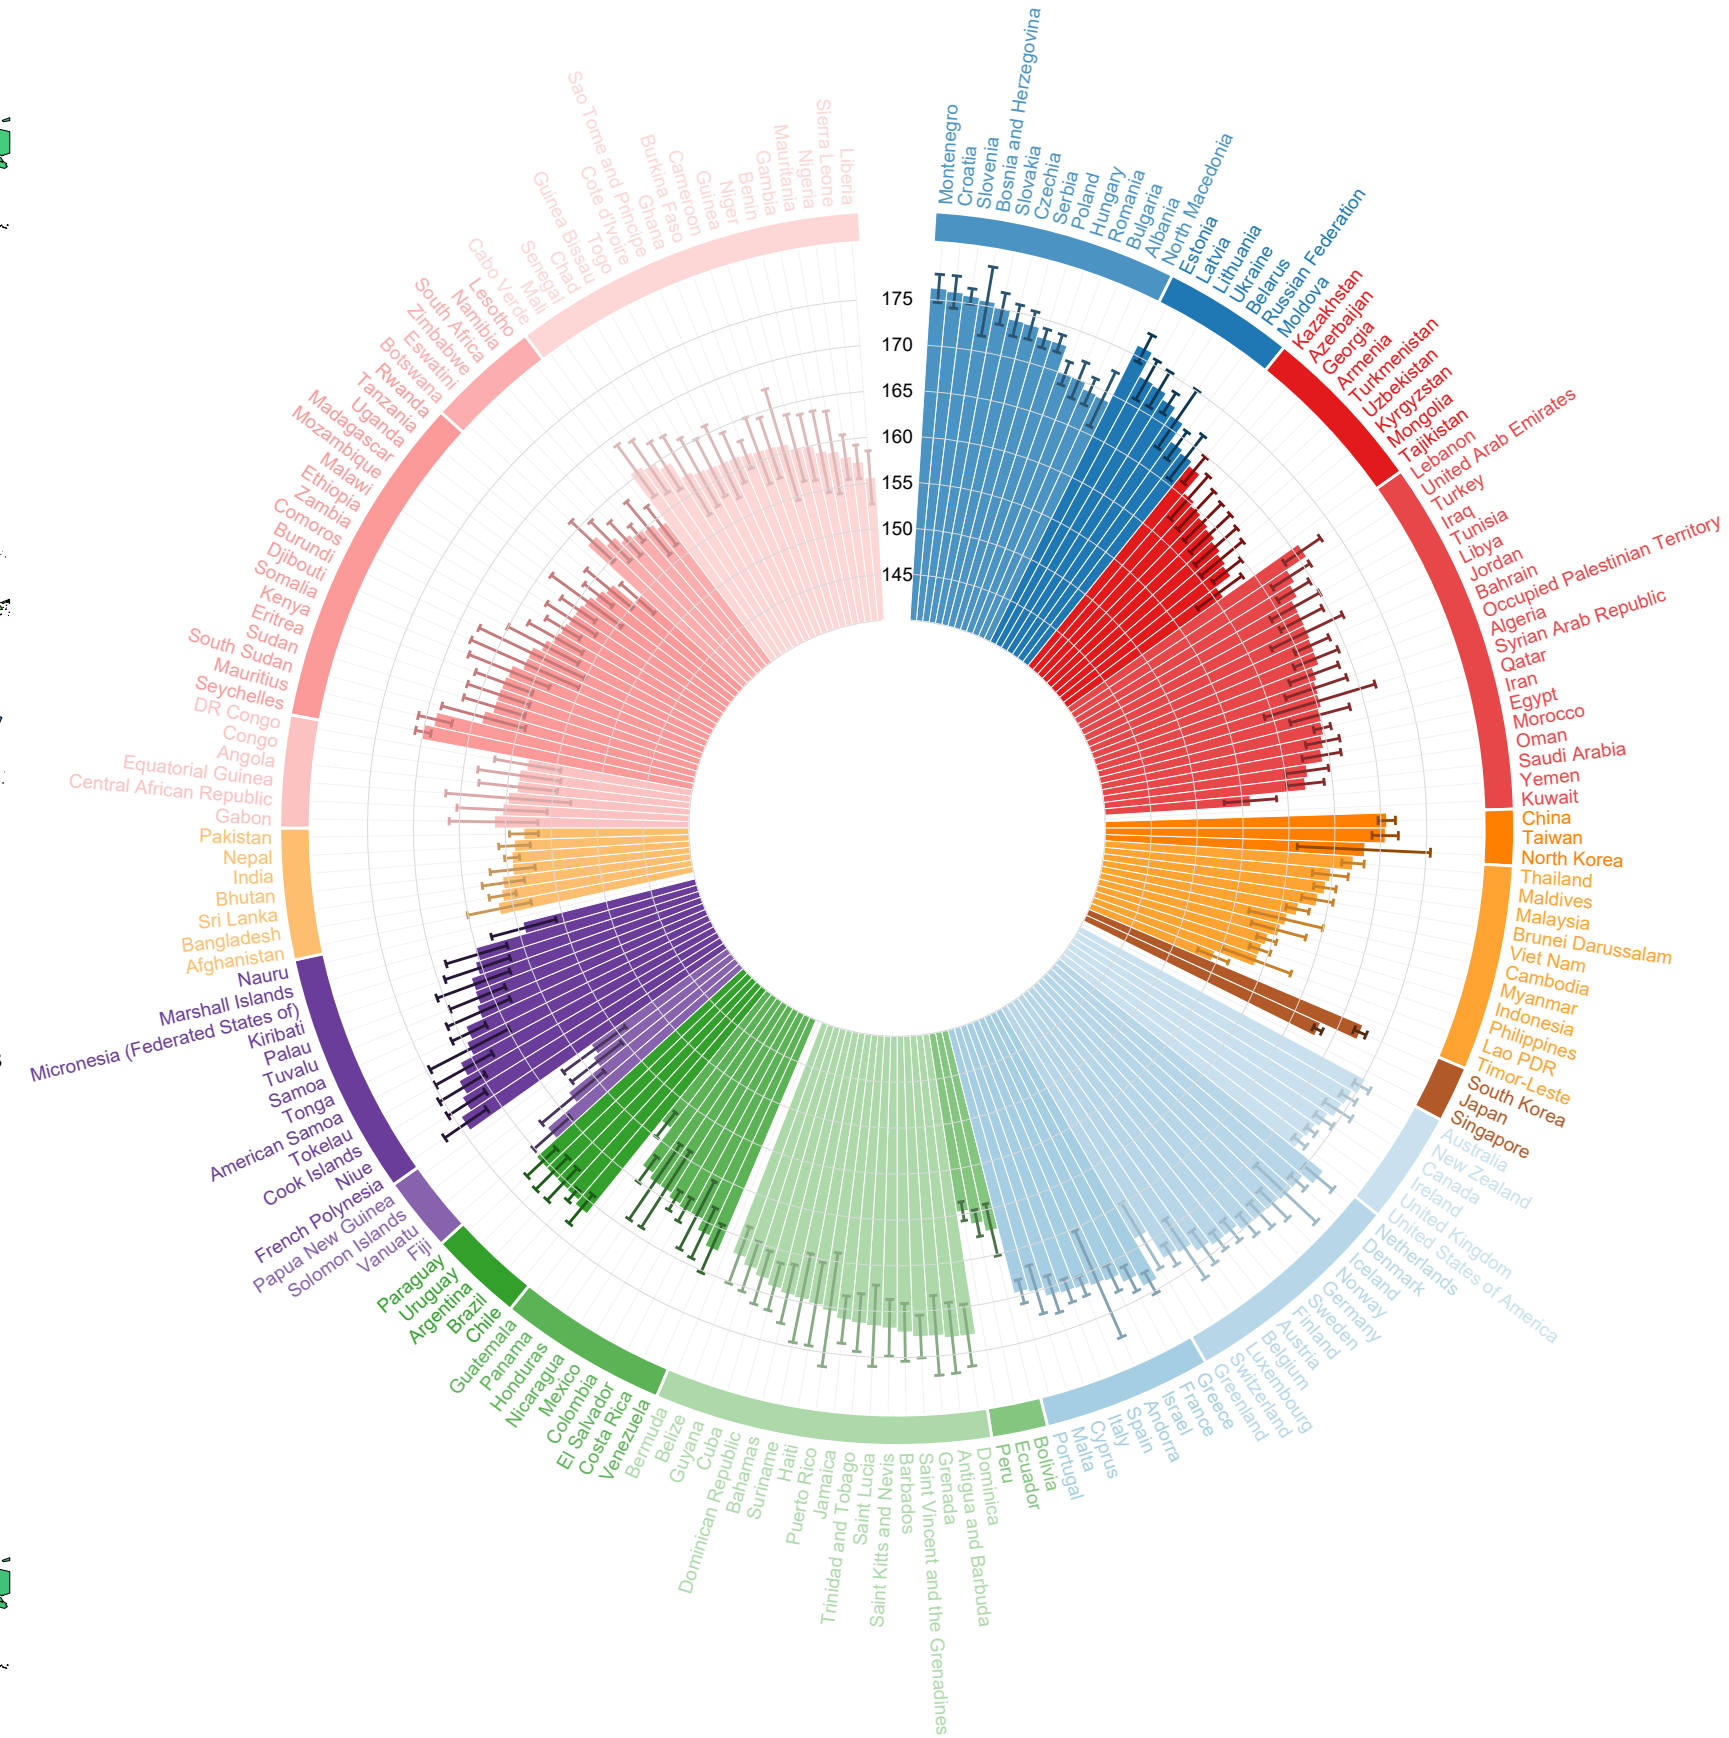

Change 1990-2020 (boys, age 15, rural)

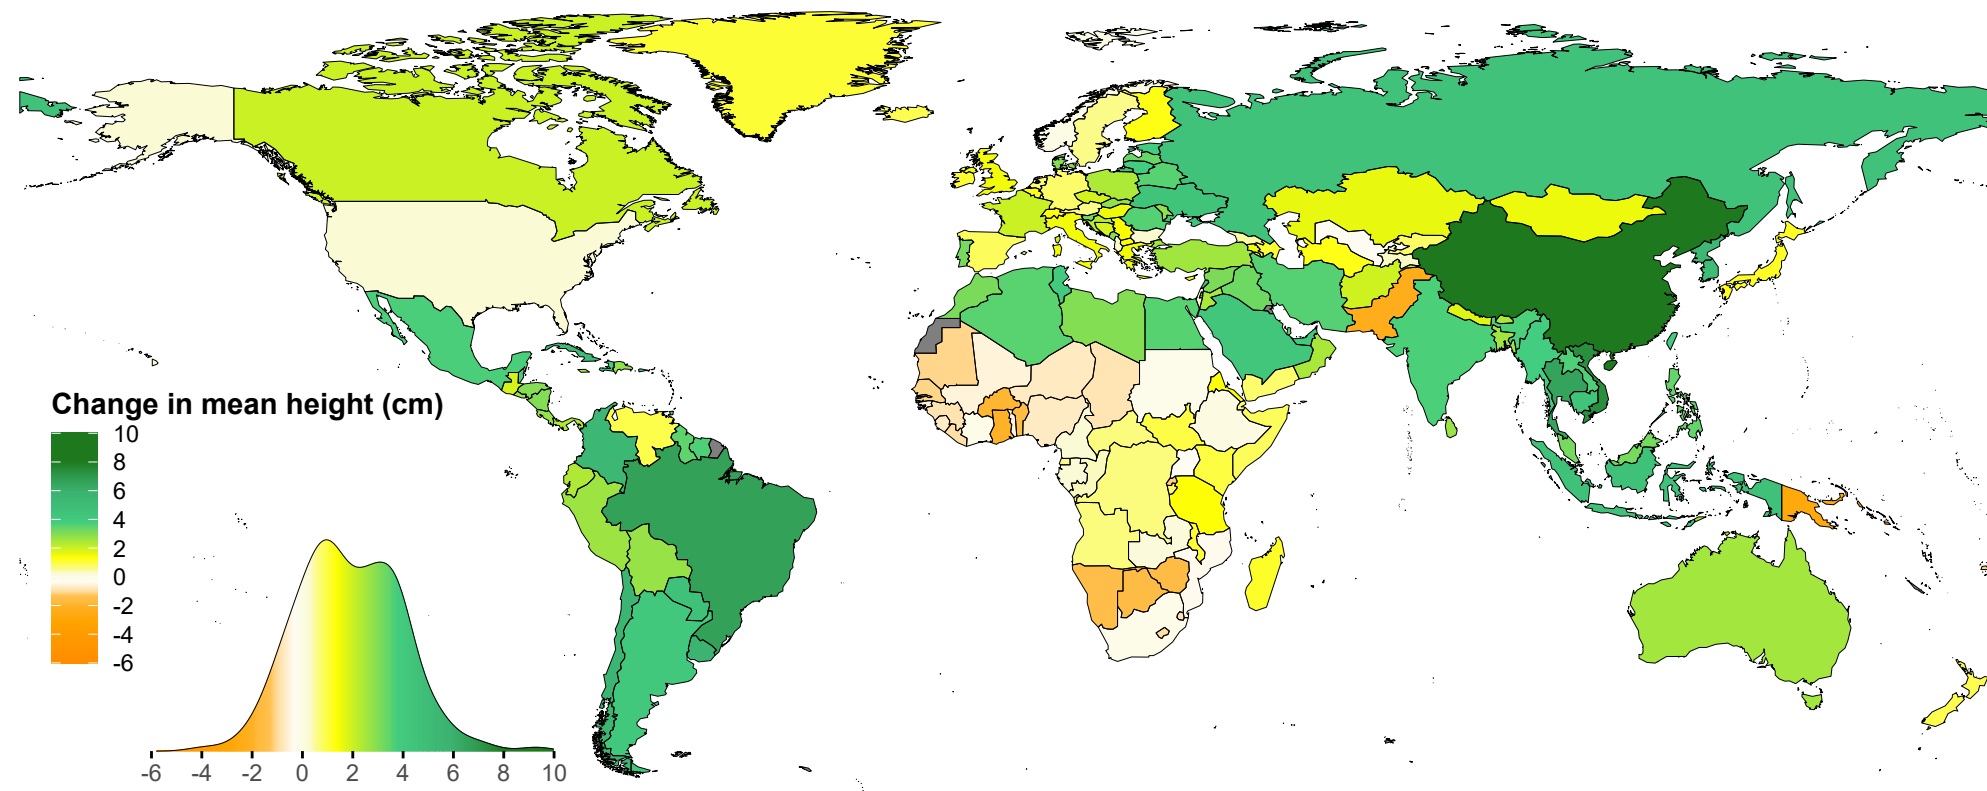

- |                                                          |                                                                        |                                                              |                                                        |
|----------------------------------------------------------|------------------------------------------------------------------------|--------------------------------------------------------------|--------------------------------------------------------|
| <span style="color: #FFD700;">■</span> American Samoa    | <span style="color: #FFA500;">■</span> Fiji                            | <span style="color: #3CB371;">■</span> Montenegro            | <span style="color: #FFD700;">■</span> Seychelles      |
| <span style="color: #3CB371;">■</span> Bahrain           | <span style="color: #9ACD32;">■</span> French Polynesia                | <span style="color: #696969;">■</span> Nauru                 | <span style="color: #FFA500;">■</span> Solomon Islands |
| <span style="color: #696969;">■</span> Bermuda           | <span style="color: #9ACD32;">■</span> Kiribati                        | <span style="color: #90EE90;">■</span> Niue                  | <span style="color: #FFD700;">■</span> Tokelau         |
| <span style="color: #3CB371;">■</span> Brunei Darussalam | <span style="color: #3CB371;">■</span> Maldives                        | <span style="color: #FFD700;">■</span> Palau                 | <span style="color: #FFD700;">■</span> Tonga           |
| <span style="color: #FFD700;">■</span> Cape Verde        | <span style="color: #FFD700;">■</span> Marshall Islands                | <span style="color: #90EE90;">■</span> Samoa                 | <span style="color: #FFD700;">■</span> Tuvalu          |
| <span style="color: #FFD700;">■</span> Comoros           | <span style="color: #3CB371;">■</span> Mauritius                       | <span style="color: #FFD700;">■</span> Sao Tome and Principe | <span style="color: #FFD700;">■</span> Vanuatu         |
| <span style="color: #9ACD32;">■</span> Cook Islands      | <span style="color: #FFD700;">■</span> Mirconesia, Federated States of |                                                              |                                                        |

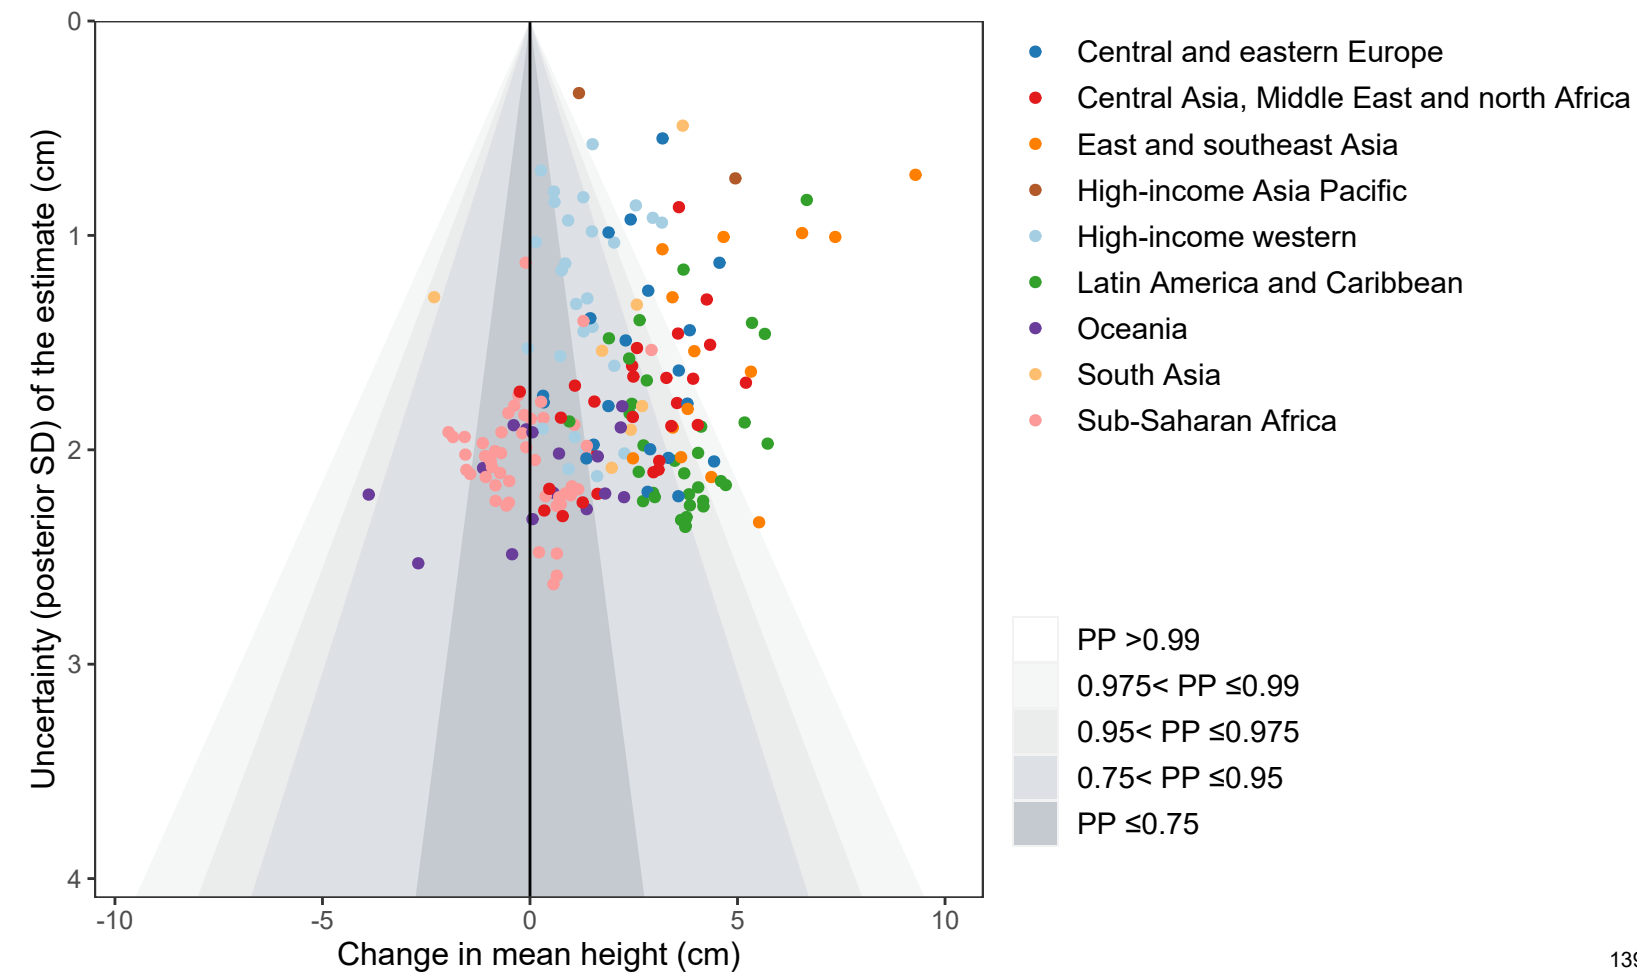



Mean height in 2020 (girls, age 19, urban)

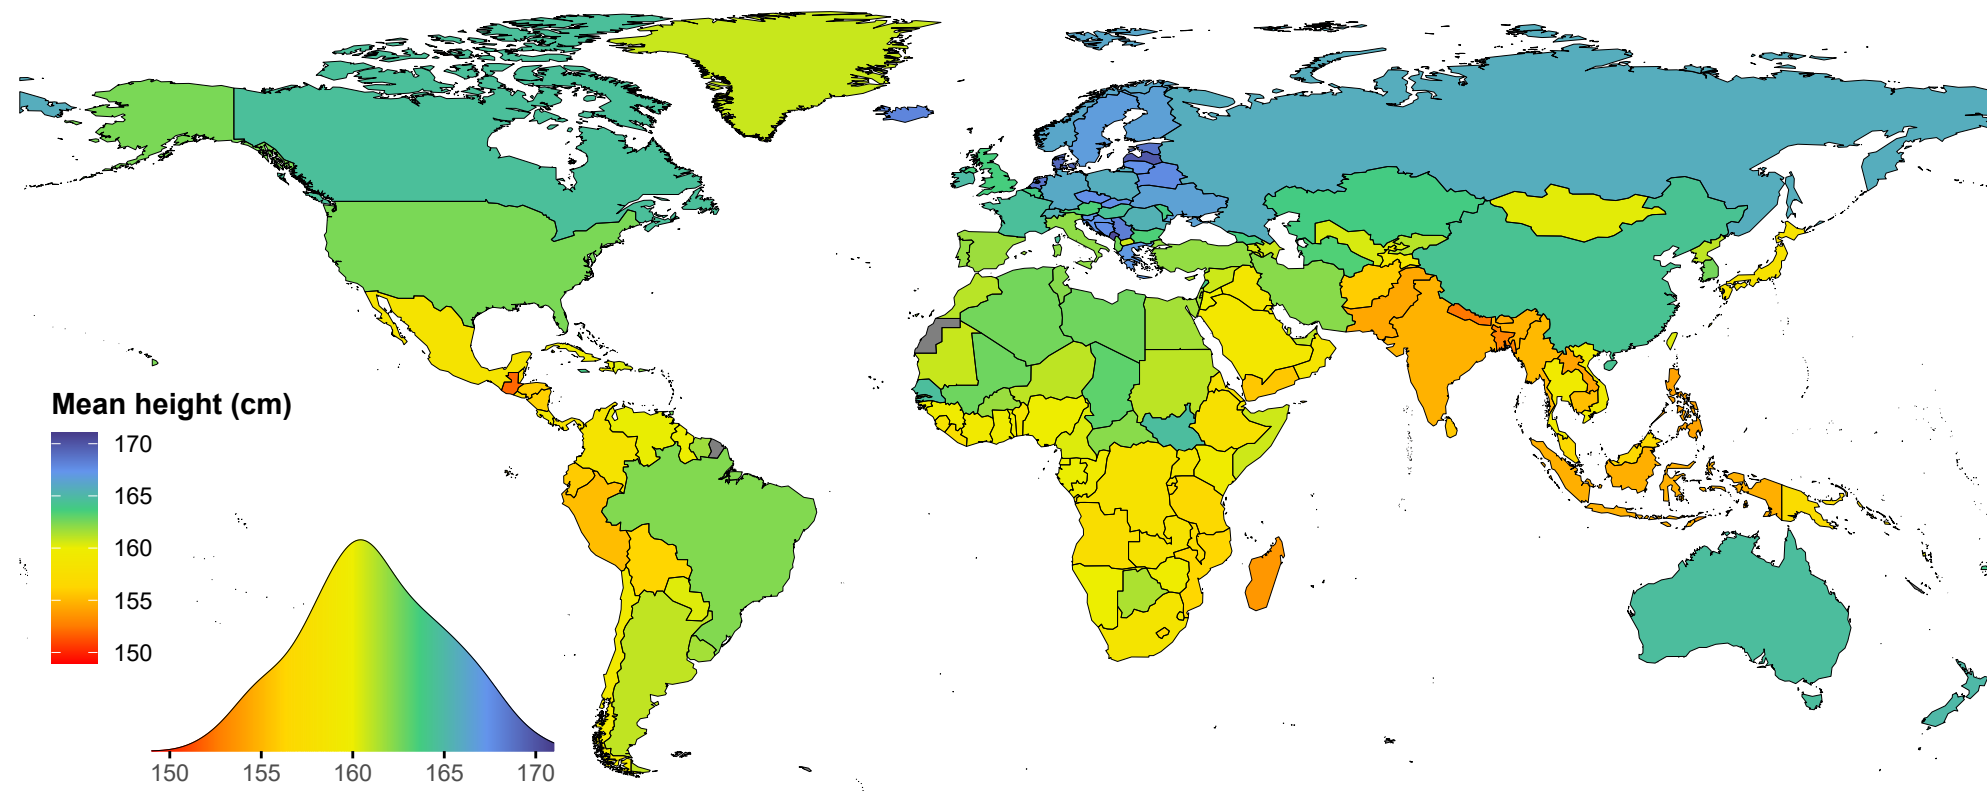

- |                                                          |                                                                        |                                                              |                                                        |
|----------------------------------------------------------|------------------------------------------------------------------------|--------------------------------------------------------------|--------------------------------------------------------|
| <span style="color: #4682B4;">■</span> American Samoa    | <span style="color: #3CB371;">■</span> Fiji                            | <span style="color: #191970;">■</span> Montenegro            | <span style="color: #9ACD32;">■</span> Seychelles      |
| <span style="color: #FFD700;">■</span> Bahrain           | <span style="color: #4682B4;">■</span> French Polynesia                | <span style="color: #FFD700;">■</span> Nauru                 | <span style="color: #FFD700;">■</span> Solomon Islands |
| <span style="color: #3CB371;">■</span> Bermuda           | <span style="color: #9ACD32;">■</span> Kiribati                        | <span style="color: #4682B4;">■</span> Niue                  | <span style="color: #696969;">■</span> Tokelau         |
| <span style="color: #FF8C00;">■</span> Brunei Darussalam | <span style="color: #FF8C00;">■</span> Maldives                        | <span style="color: #FFD700;">■</span> Palau                 | <span style="color: #4682B4;">■</span> Tonga           |
| <span style="color: #4682B4;">■</span> Cape Verde        | <span style="color: #FF8C00;">■</span> Marshall Islands                | <span style="color: #3CB371;">■</span> Samoa                 | <span style="color: #3CB371;">■</span> Tuvalu          |
| <span style="color: #FFD700;">■</span> Comoros           | <span style="color: #9ACD32;">■</span> Mauritius                       | <span style="color: #3CB371;">■</span> Sao Tome and Principe | <span style="color: #FFD700;">■</span> Vanuatu         |
| <span style="color: #4682B4;">■</span> Cook Islands      | <span style="color: #FFD700;">■</span> Mirconesia, Federated States of |                                                              |                                                        |

Change 1990-2020 (girls, age 19, urban)

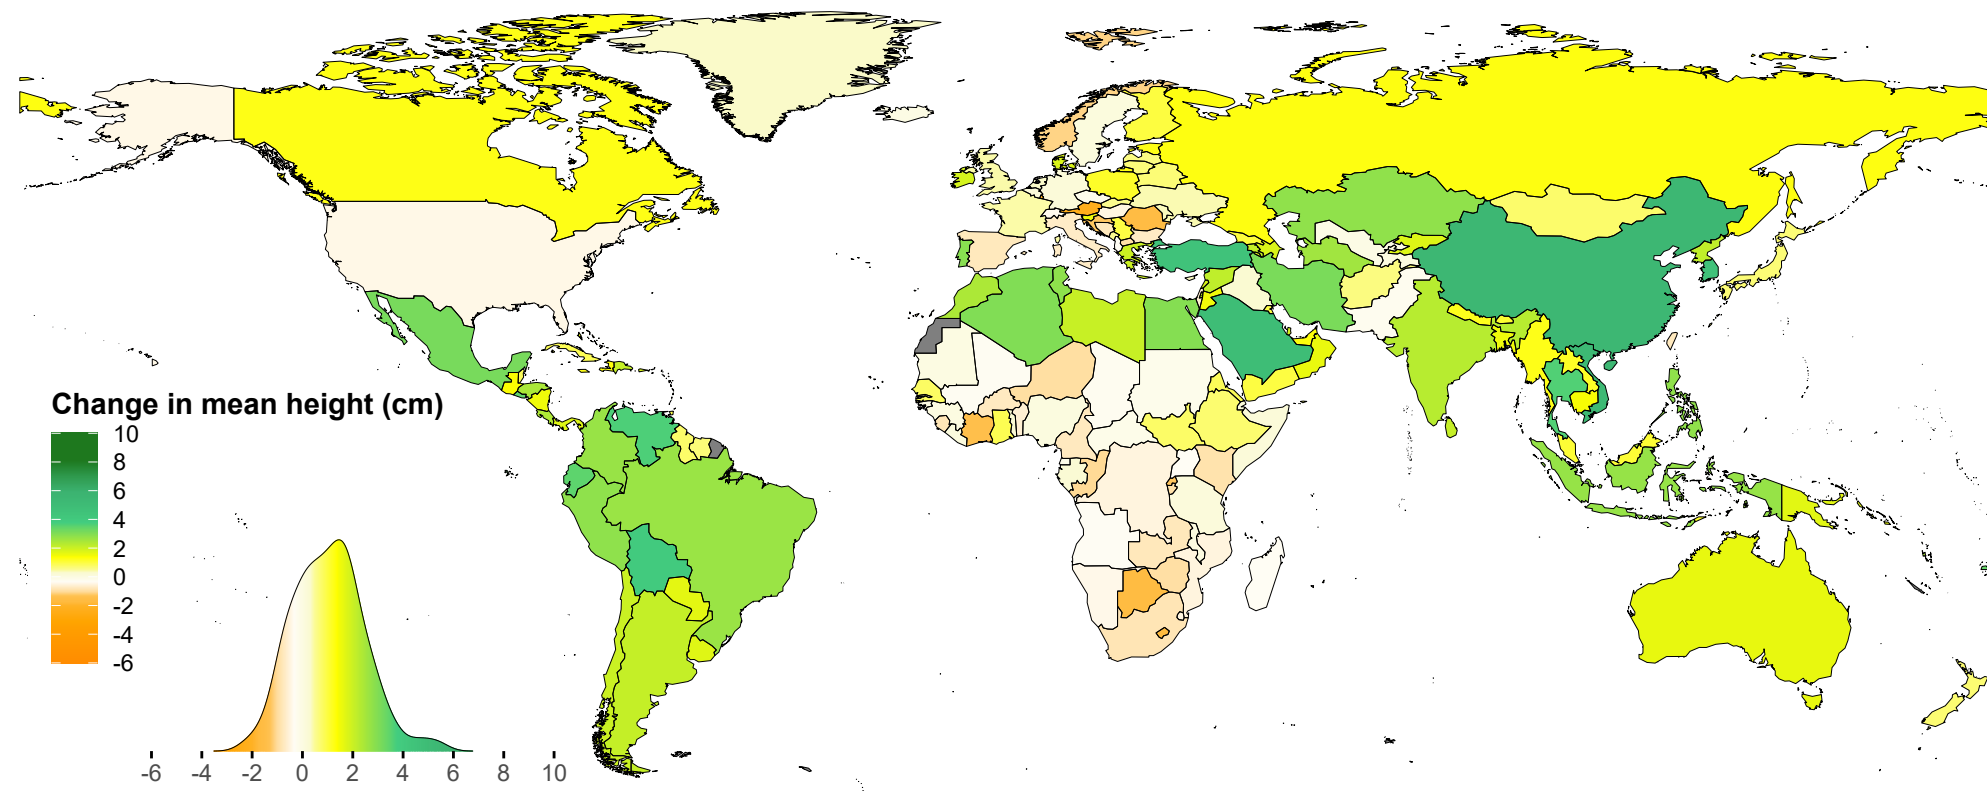

- |                                                          |                                                                        |                                                              |                                                        |
|----------------------------------------------------------|------------------------------------------------------------------------|--------------------------------------------------------------|--------------------------------------------------------|
| <span style="color: #FFD700;">■</span> American Samoa    | <span style="color: #3CB371;">■</span> Fiji                            | <span style="color: #FFD700;">■</span> Montenegro            | <span style="color: #FFD700;">■</span> Seychelles      |
| <span style="color: #FFD700;">■</span> Bahrain           | <span style="color: #9ACD32;">■</span> French Polynesia                | <span style="color: #FFD700;">■</span> Nauru                 | <span style="color: #FFD700;">■</span> Solomon Islands |
| <span style="color: #9ACD32;">■</span> Bermuda           | <span style="color: #9ACD32;">■</span> Kiribati                        | <span style="color: #9ACD32;">■</span> Niue                  | <span style="color: #696969;">■</span> Tokelau         |
| <span style="color: #9ACD32;">■</span> Brunei Darussalam | <span style="color: #9ACD32;">■</span> Maldives                        | <span style="color: #FFD700;">■</span> Palau                 | <span style="color: #FFD700;">■</span> Tonga           |
| <span style="color: #FFD700;">■</span> Cape Verde        | <span style="color: #FFD700;">■</span> Marshall Islands                | <span style="color: #9ACD32;">■</span> Samoa                 | <span style="color: #FFD700;">■</span> Tuvalu          |
| <span style="color: #FFD700;">■</span> Comoros           | <span style="color: #9ACD32;">■</span> Mauritius                       | <span style="color: #FFD700;">■</span> Sao Tome and Principe | <span style="color: #9ACD32;">■</span> Vanuatu         |
| <span style="color: #3CB371;">■</span> Cook Islands      | <span style="color: #FFD700;">■</span> Mirconesia, Federated States of |                                                              |                                                        |

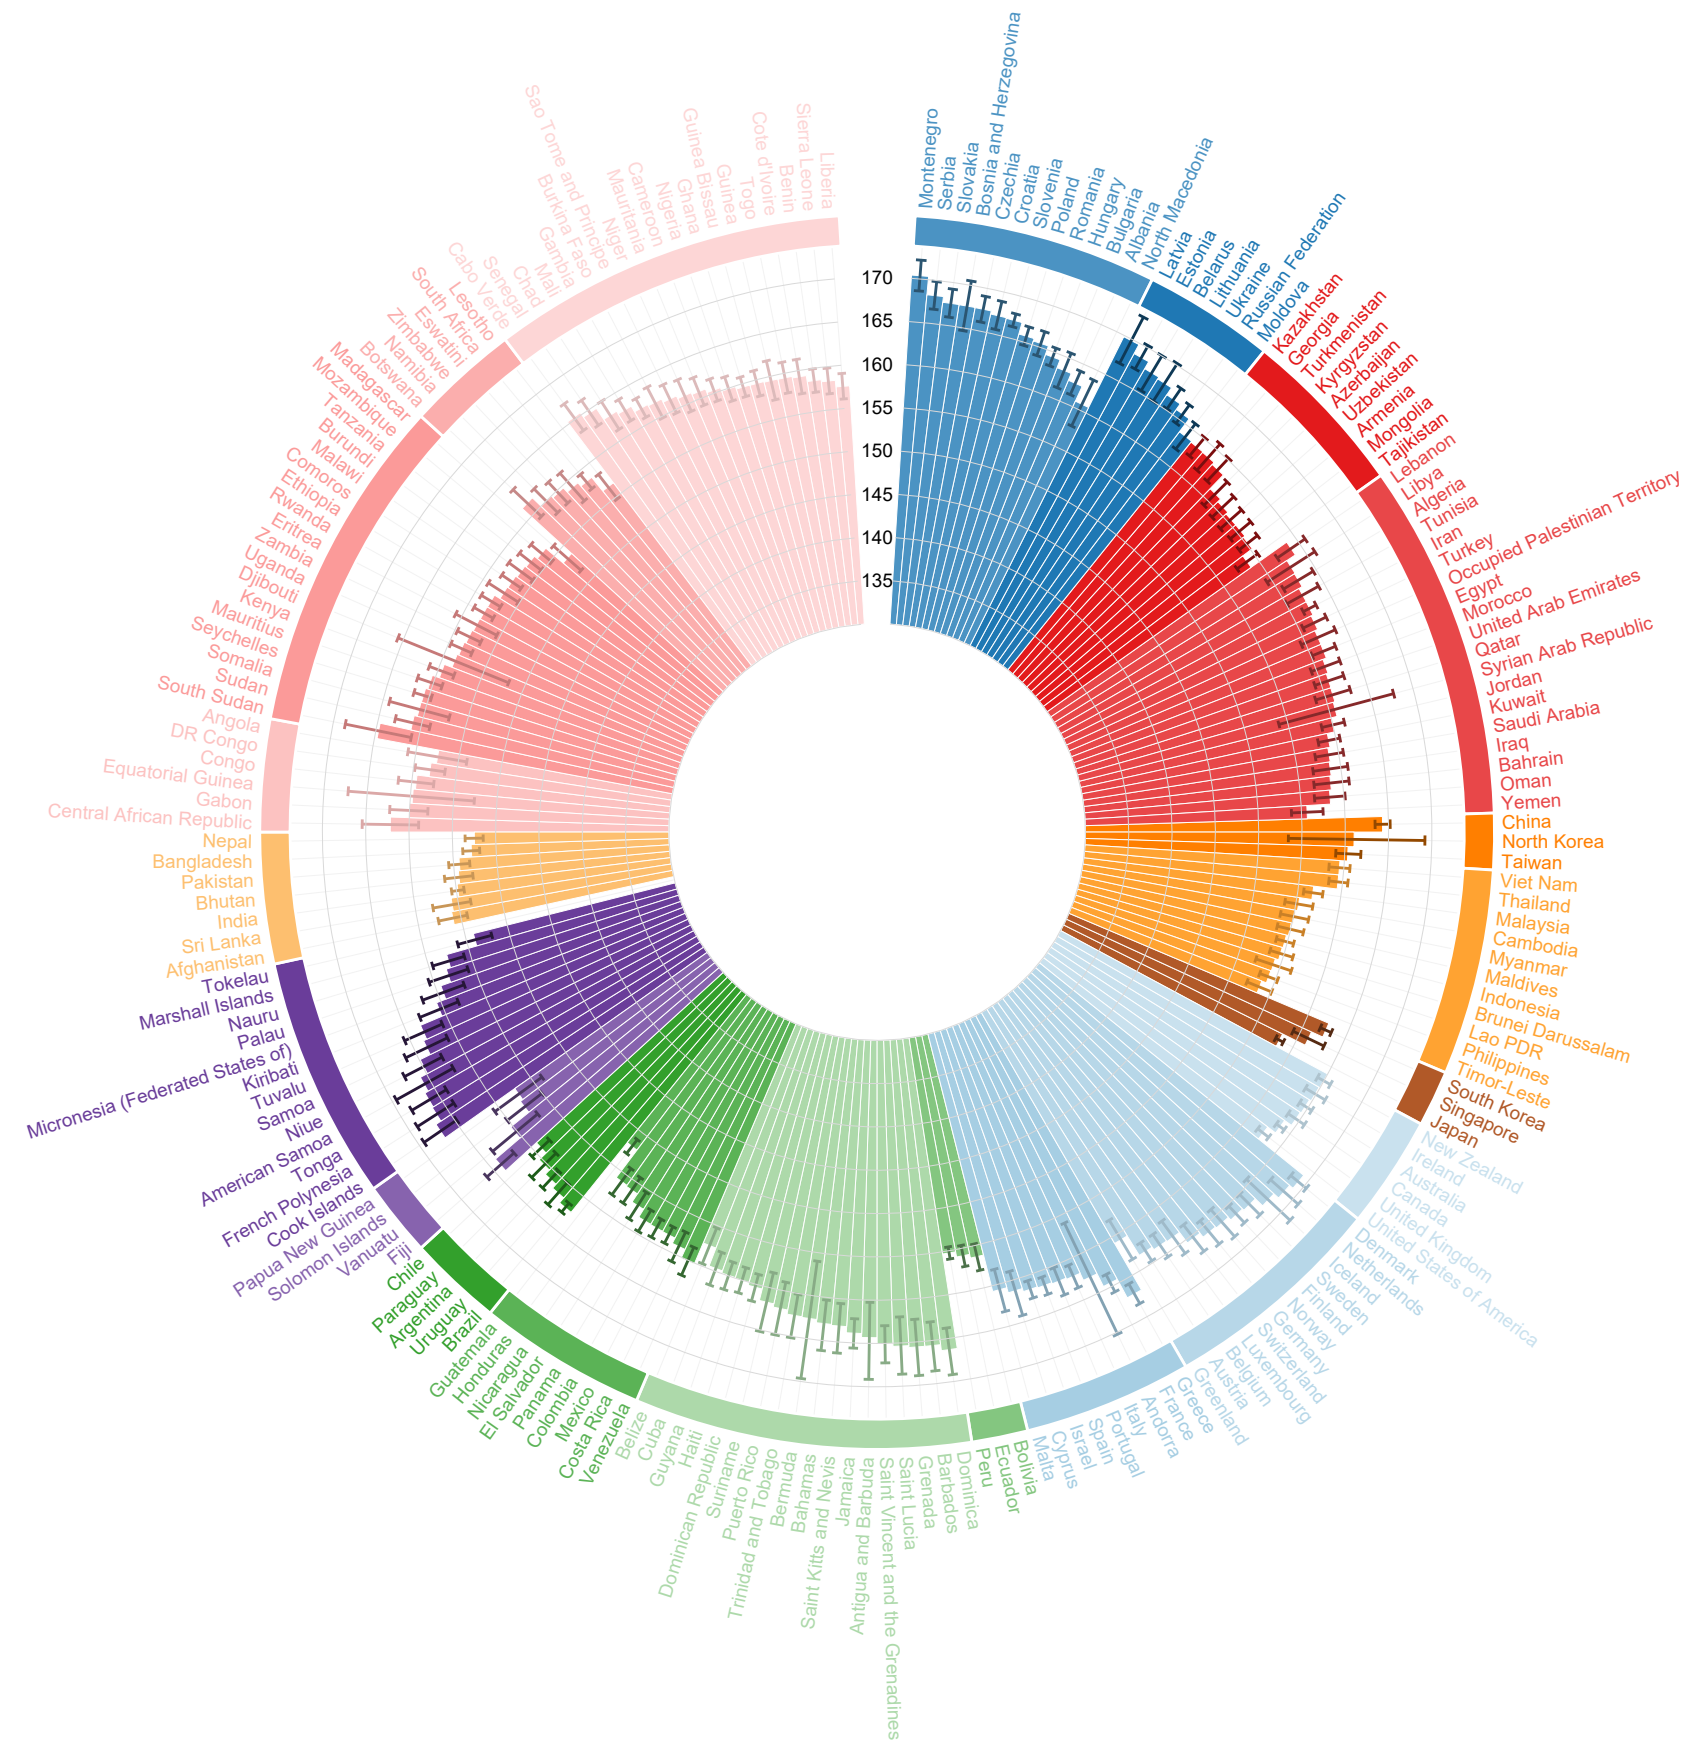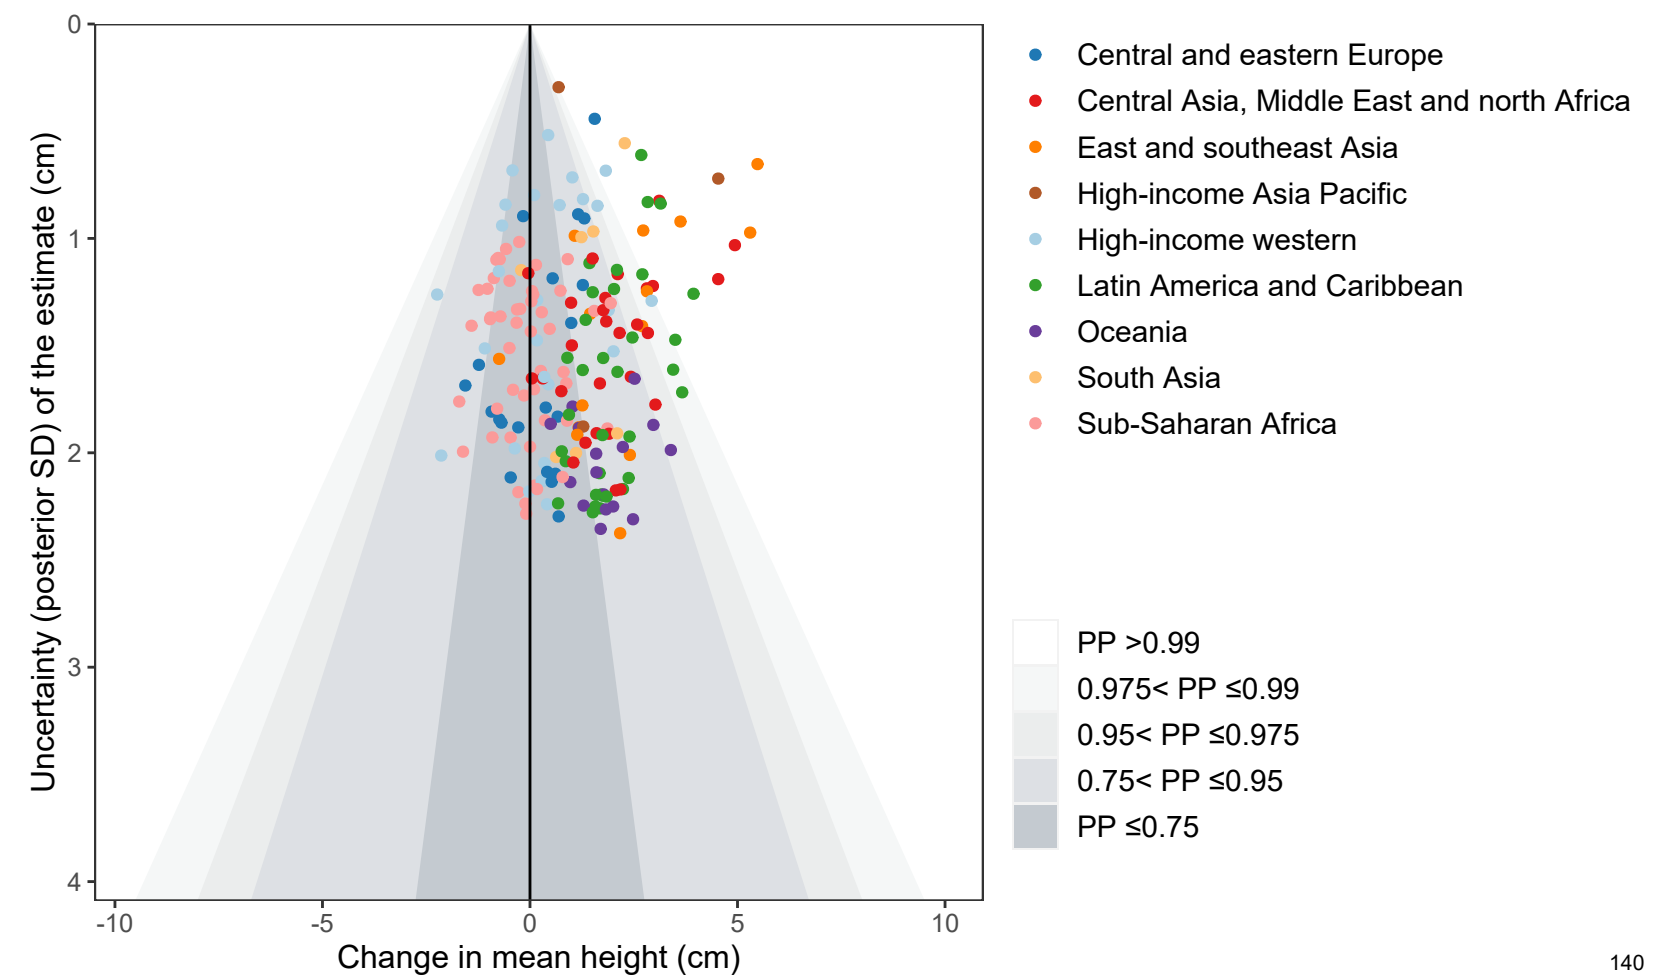



Mean height in 2020 (girls, age 19, rural)

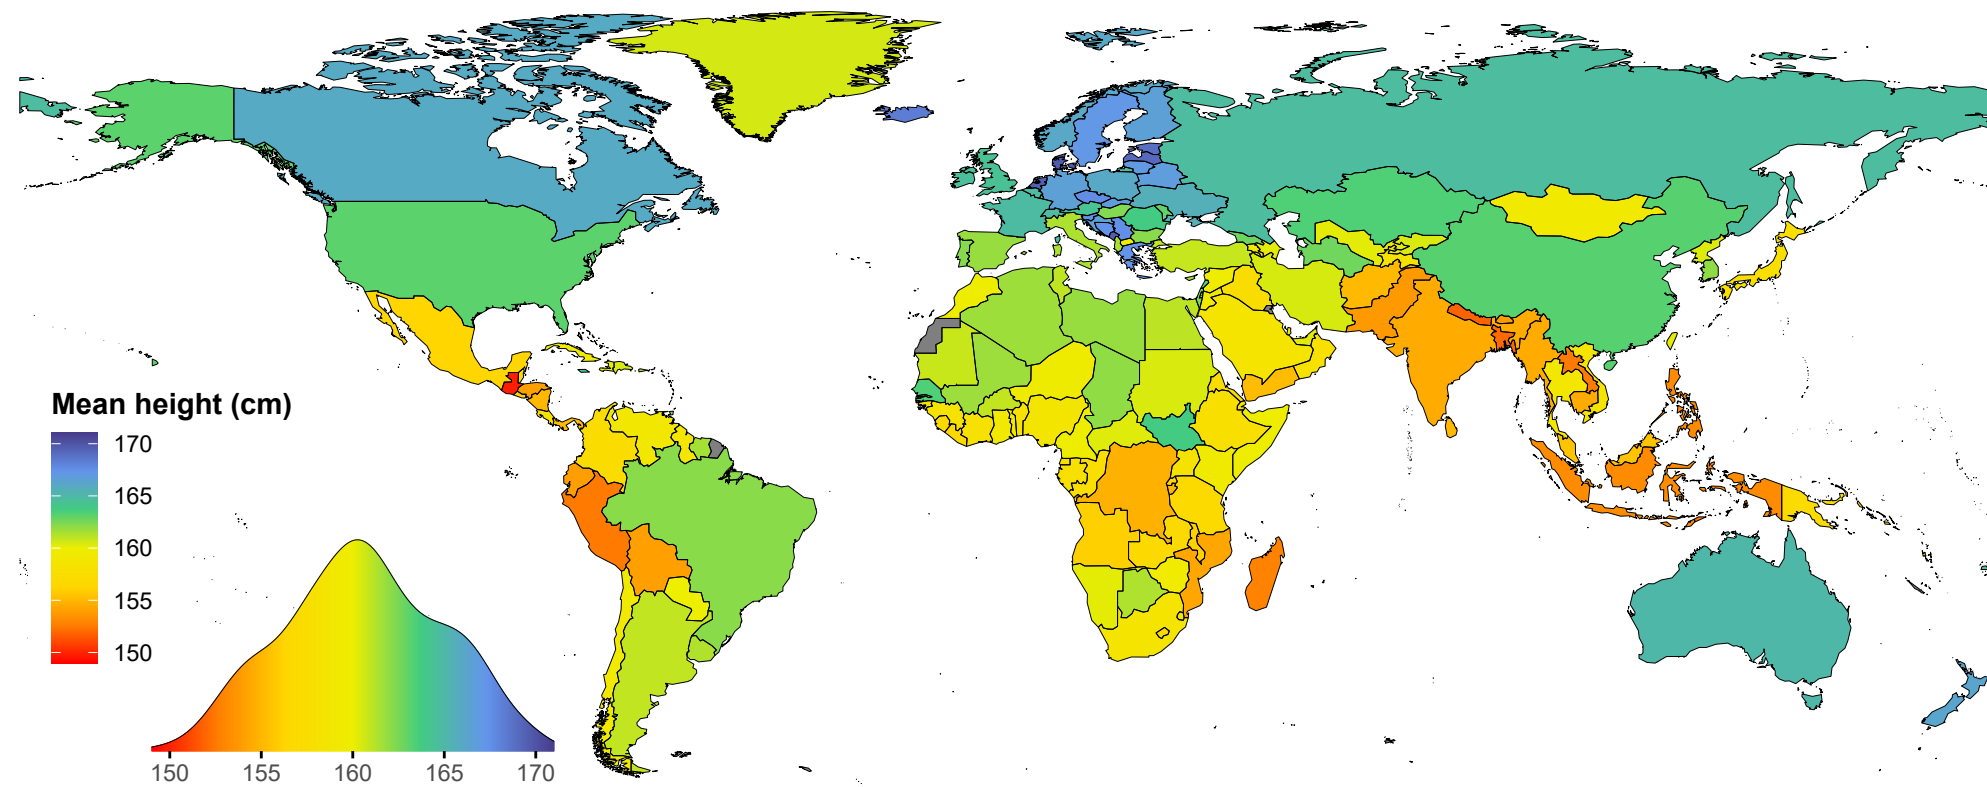

- |                                                          |                                                                        |                                                              |                                                        |
|----------------------------------------------------------|------------------------------------------------------------------------|--------------------------------------------------------------|--------------------------------------------------------|
| <span style="color: #4682B4;">■</span> American Samoa    | <span style="color: #4682B4;">■</span> Fiji                            | <span style="color: #4682B4;">■</span> Montenegro            | <span style="color: #90EE90;">■</span> Seychelles      |
| <span style="color: #FFD700;">■</span> Bahrain           | <span style="color: #4682B4;">■</span> French Polynesia                | <span style="color: #4682B4;">■</span> Nauru                 | <span style="color: #FFD700;">■</span> Solomon Islands |
| <span style="color: #808080;">■</span> Bermuda           | <span style="color: #90EE90;">■</span> Kiribati                        | <span style="color: #4682B4;">■</span> Niue                  | <span style="color: #4682B4;">■</span> Tokelau         |
| <span style="color: #FF8C00;">■</span> Brunei Darussalam | <span style="color: #FF8C00;">■</span> Maldives                        | <span style="color: #FFD700;">■</span> Palau                 | <span style="color: #4682B4;">■</span> Tonga           |
| <span style="color: #3CB371;">■</span> Cape Verde        | <span style="color: #FF8C00;">■</span> Marshall Islands                | <span style="color: #3CB371;">■</span> Samoa                 | <span style="color: #3CB371;">■</span> Tuvalu          |
| <span style="color: #FFD700;">■</span> Comoros           | <span style="color: #FFD700;">■</span> Mauritius                       | <span style="color: #90EE90;">■</span> Sao Tome and Principe | <span style="color: #FFD700;">■</span> Vanuatu         |
| <span style="color: #4682B4;">■</span> Cook Islands      | <span style="color: #FFD700;">■</span> Mirconesia, Federated States of |                                                              |                                                        |

Change 1990-2020 (girls, age 19, rural)

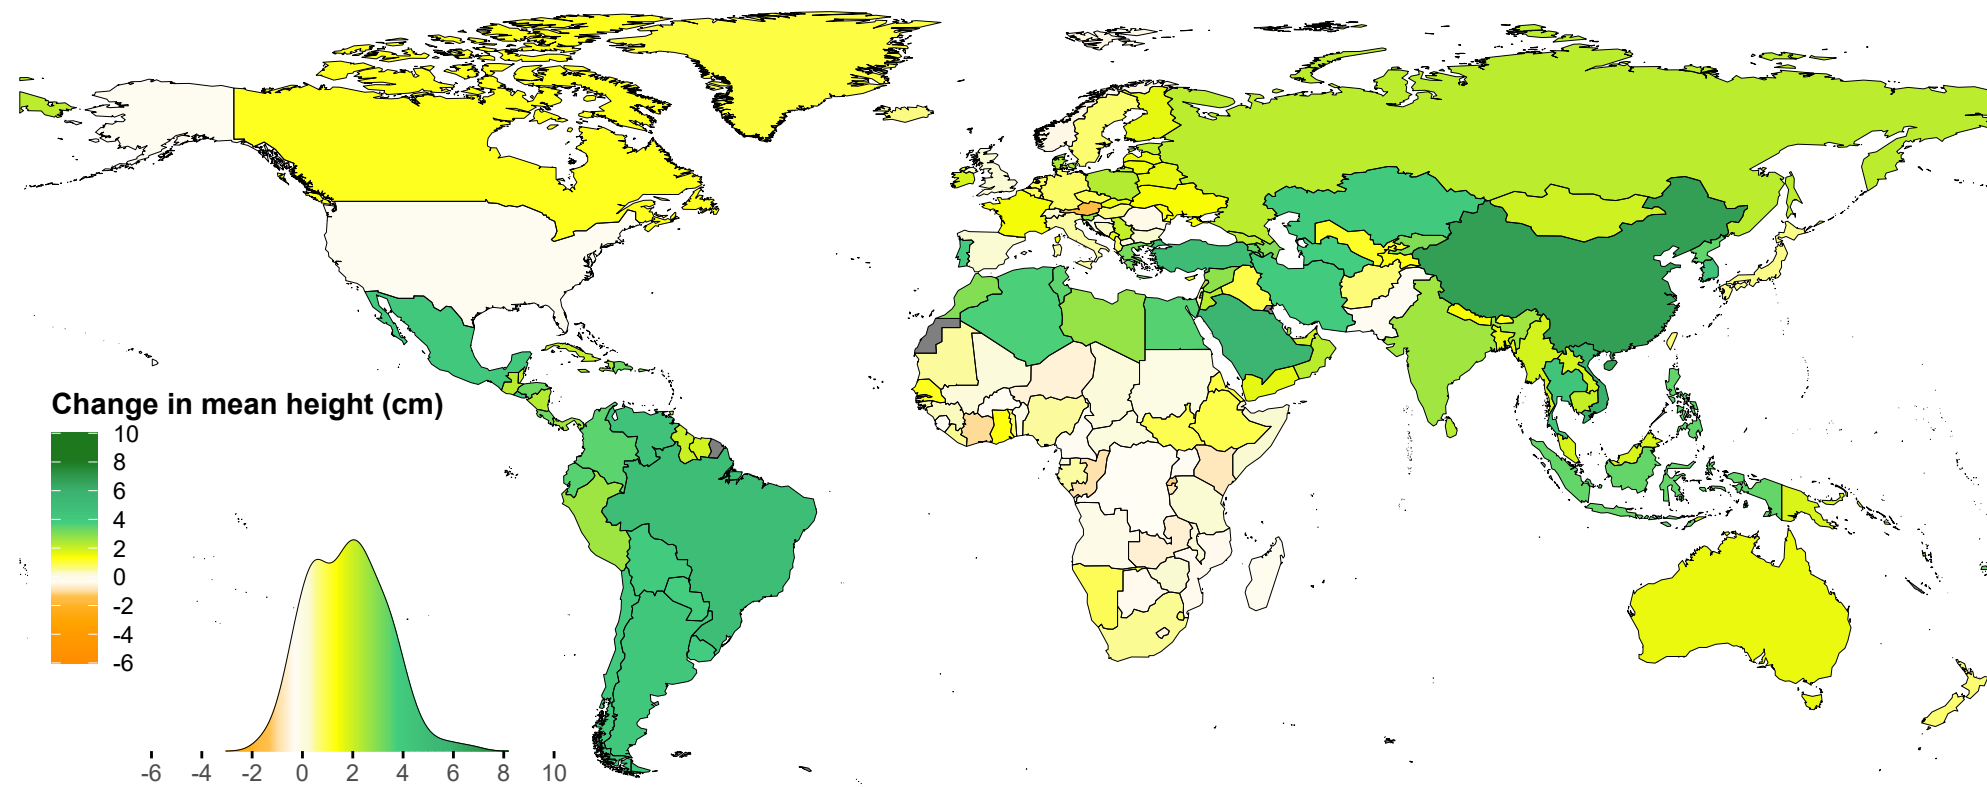

- |                                                          |                                                                        |                                                              |                                                        |
|----------------------------------------------------------|------------------------------------------------------------------------|--------------------------------------------------------------|--------------------------------------------------------|
| <span style="color: #FFD700;">■</span> American Samoa    | <span style="color: #3CB371;">■</span> Fiji                            | <span style="color: #FFD700;">■</span> Montenegro            | <span style="color: #FFD700;">■</span> Seychelles      |
| <span style="color: #90EE90;">■</span> Bahrain           | <span style="color: #90EE90;">■</span> French Polynesia                | <span style="color: #808080;">■</span> Nauru                 | <span style="color: #FFD700;">■</span> Solomon Islands |
| <span style="color: #808080;">■</span> Bermuda           | <span style="color: #90EE90;">■</span> Kiribati                        | <span style="color: #90EE90;">■</span> Niue                  | <span style="color: #90EE90;">■</span> Tokelau         |
| <span style="color: #90EE90;">■</span> Brunei Darussalam | <span style="color: #90EE90;">■</span> Maldives                        | <span style="color: #FFD700;">■</span> Palau                 | <span style="color: #90EE90;">■</span> Tonga           |
| <span style="color: #90EE90;">■</span> Cape Verde        | <span style="color: #FFD700;">■</span> Marshall Islands                | <span style="color: #90EE90;">■</span> Samoa                 | <span style="color: #90EE90;">■</span> Tuvalu          |
| <span style="color: #FFD700;">■</span> Comoros           | <span style="color: #90EE90;">■</span> Mauritius                       | <span style="color: #FFD700;">■</span> Sao Tome and Principe | <span style="color: #90EE90;">■</span> Vanuatu         |
| <span style="color: #3CB371;">■</span> Cook Islands      | <span style="color: #FFD700;">■</span> Mirconesia, Federated States of |                                                              |                                                        |

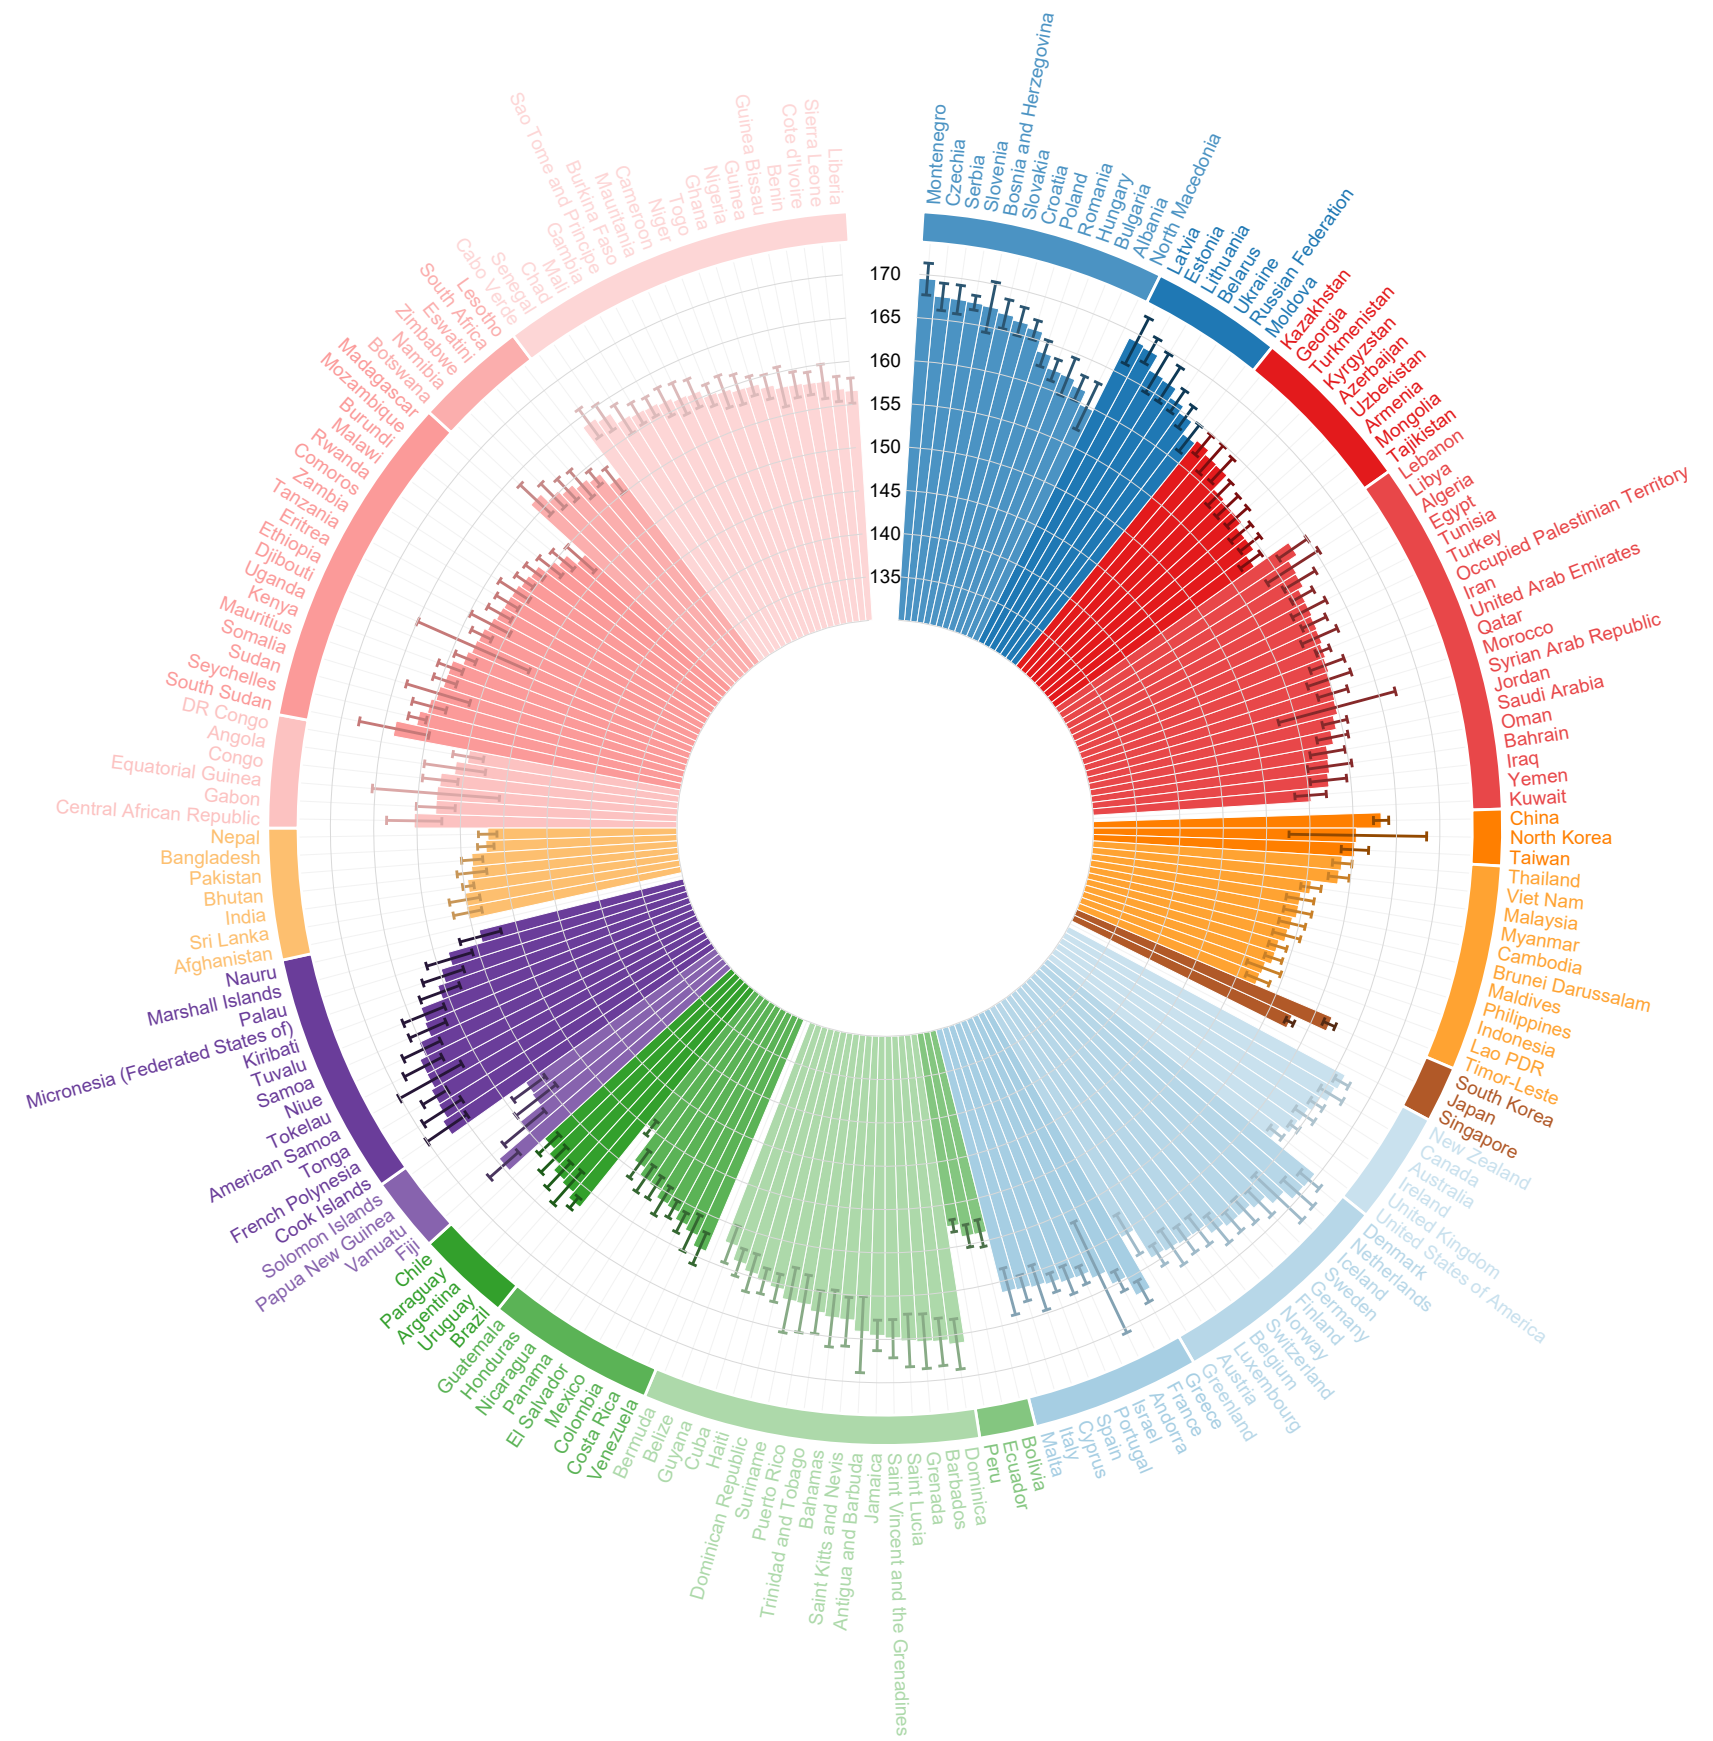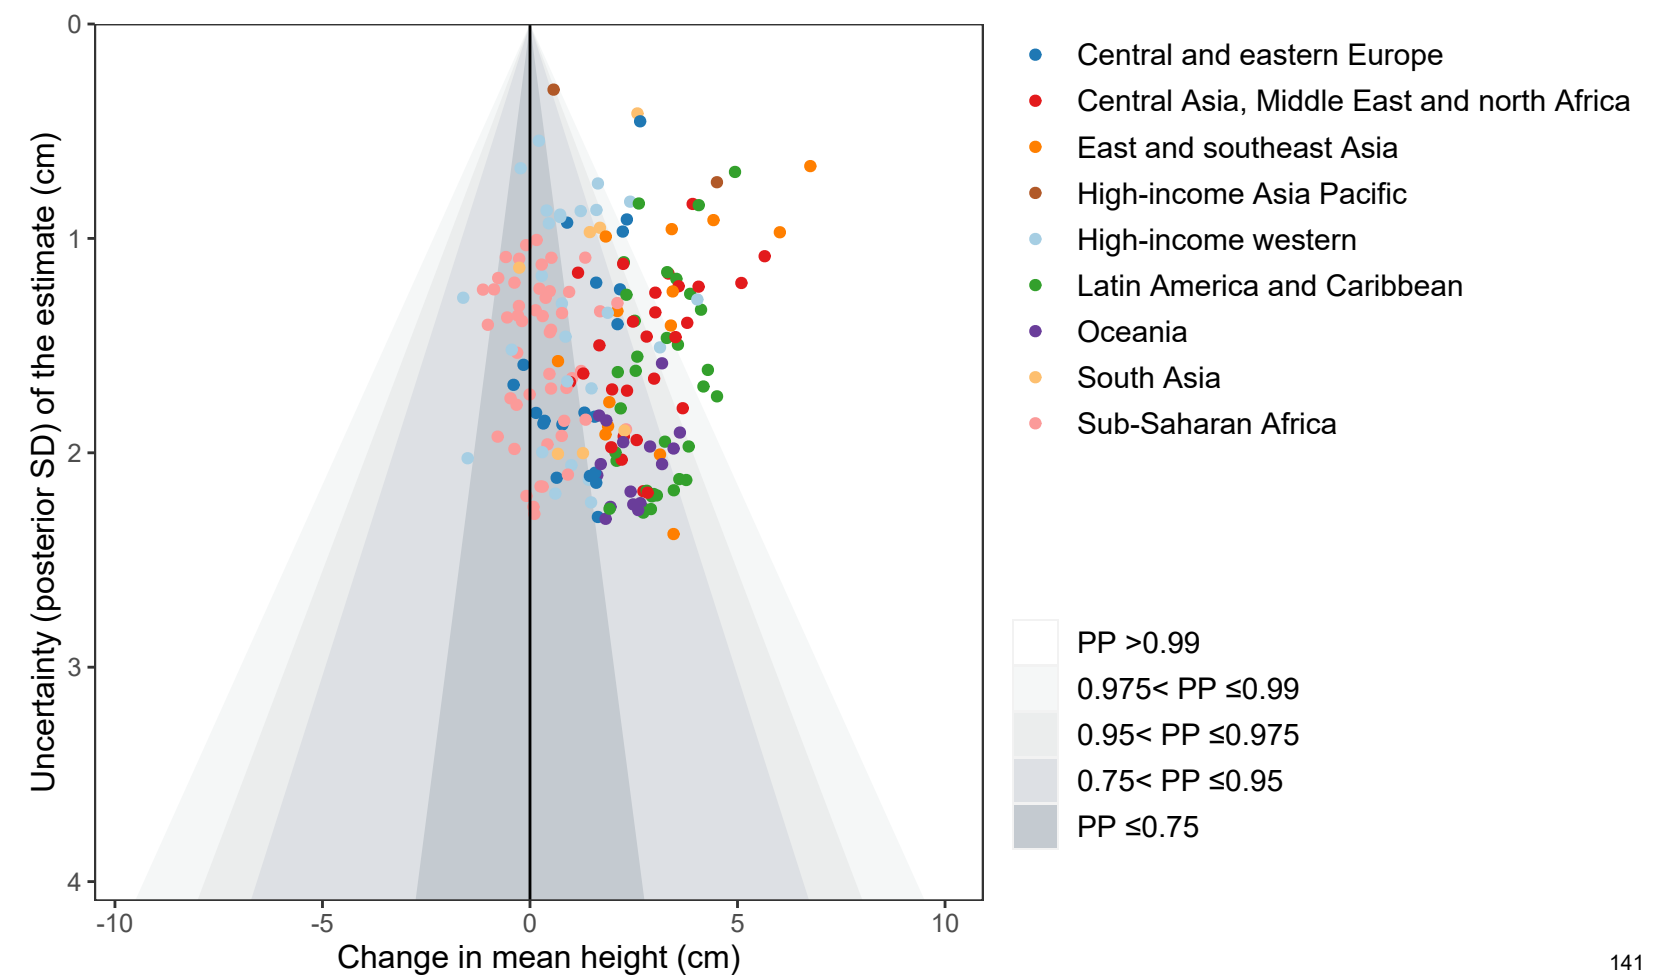



Mean height in 2020 (boys, age 19, urban)

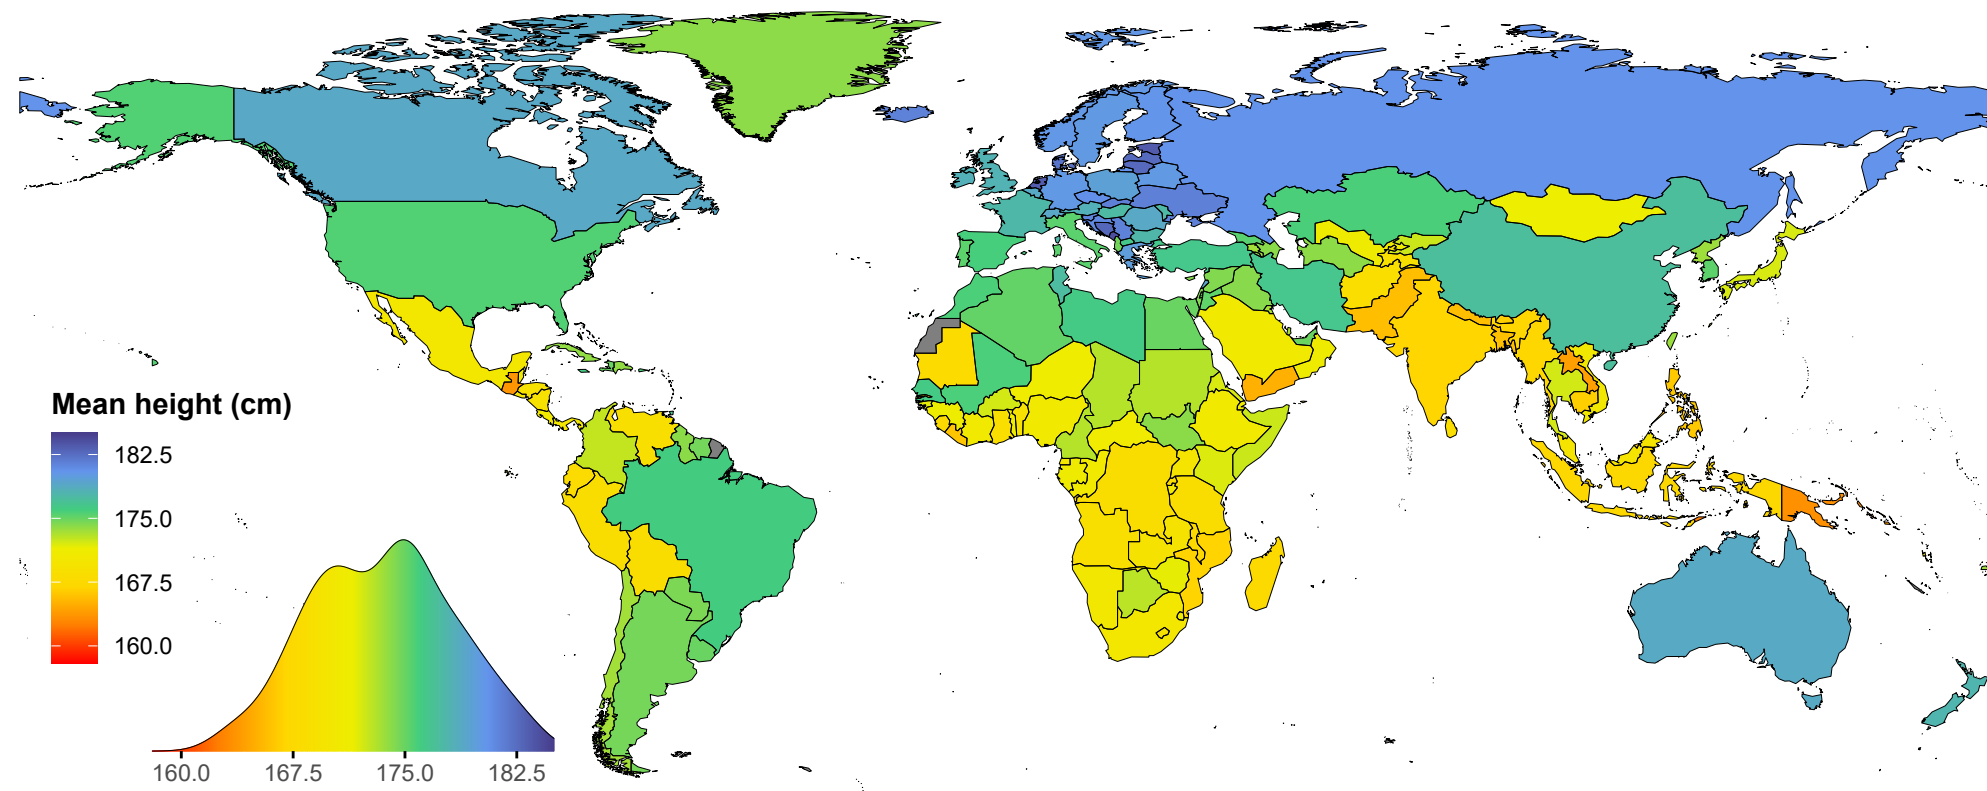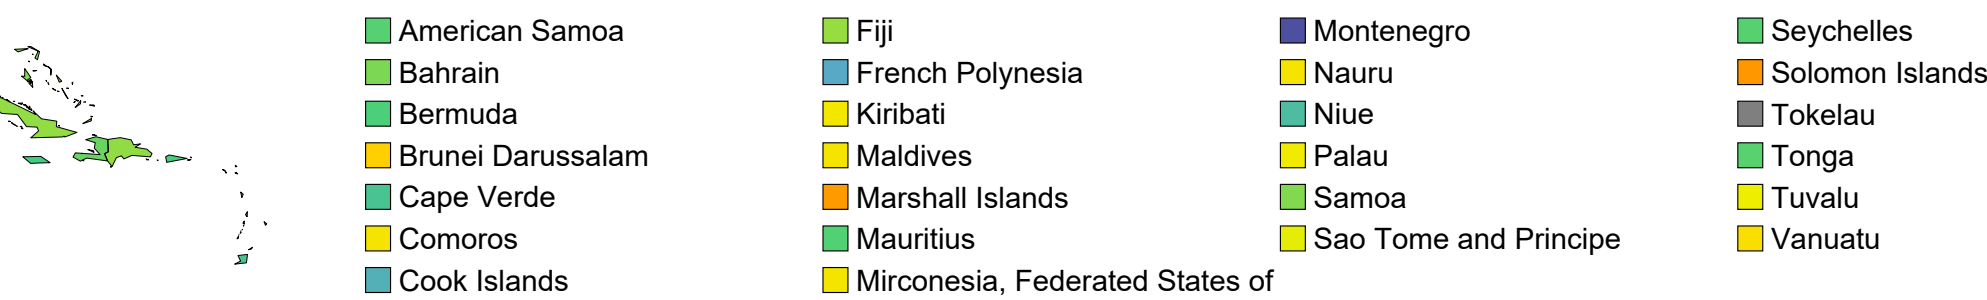

Change 1990-2020 (boys, age 19, urban)

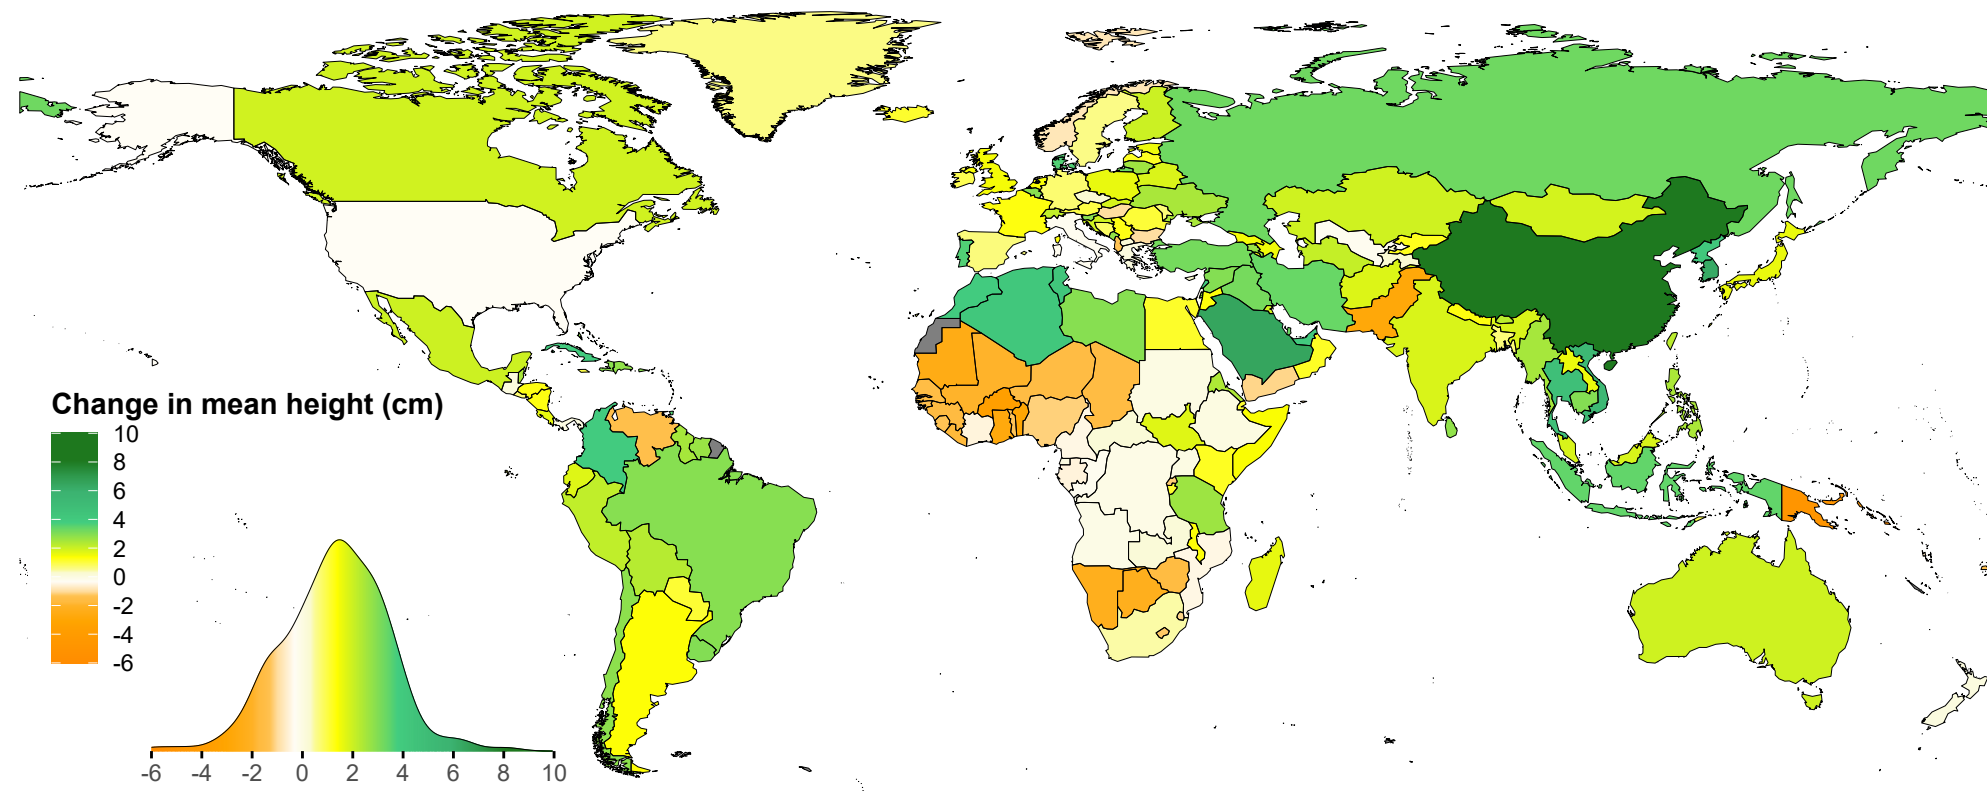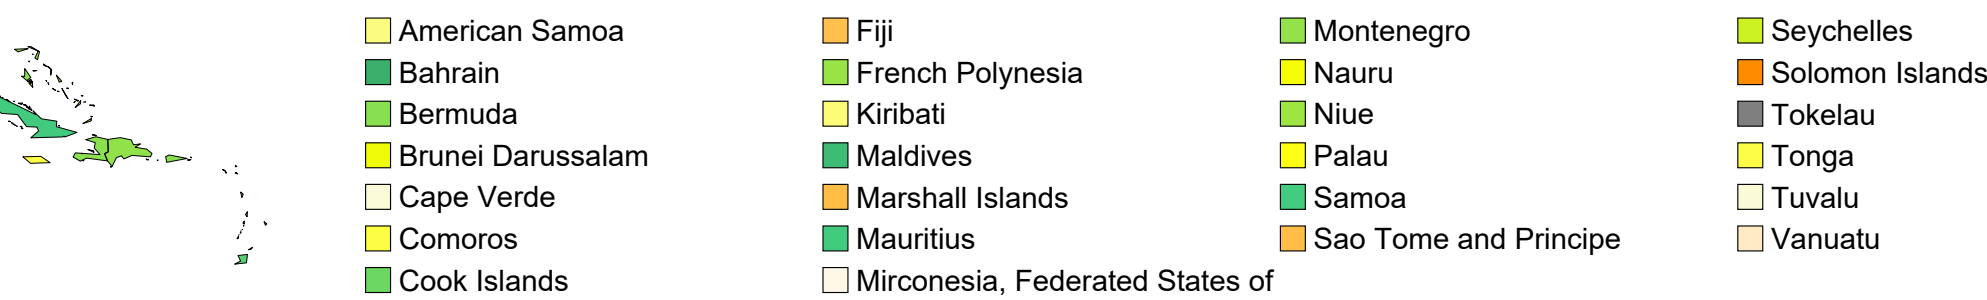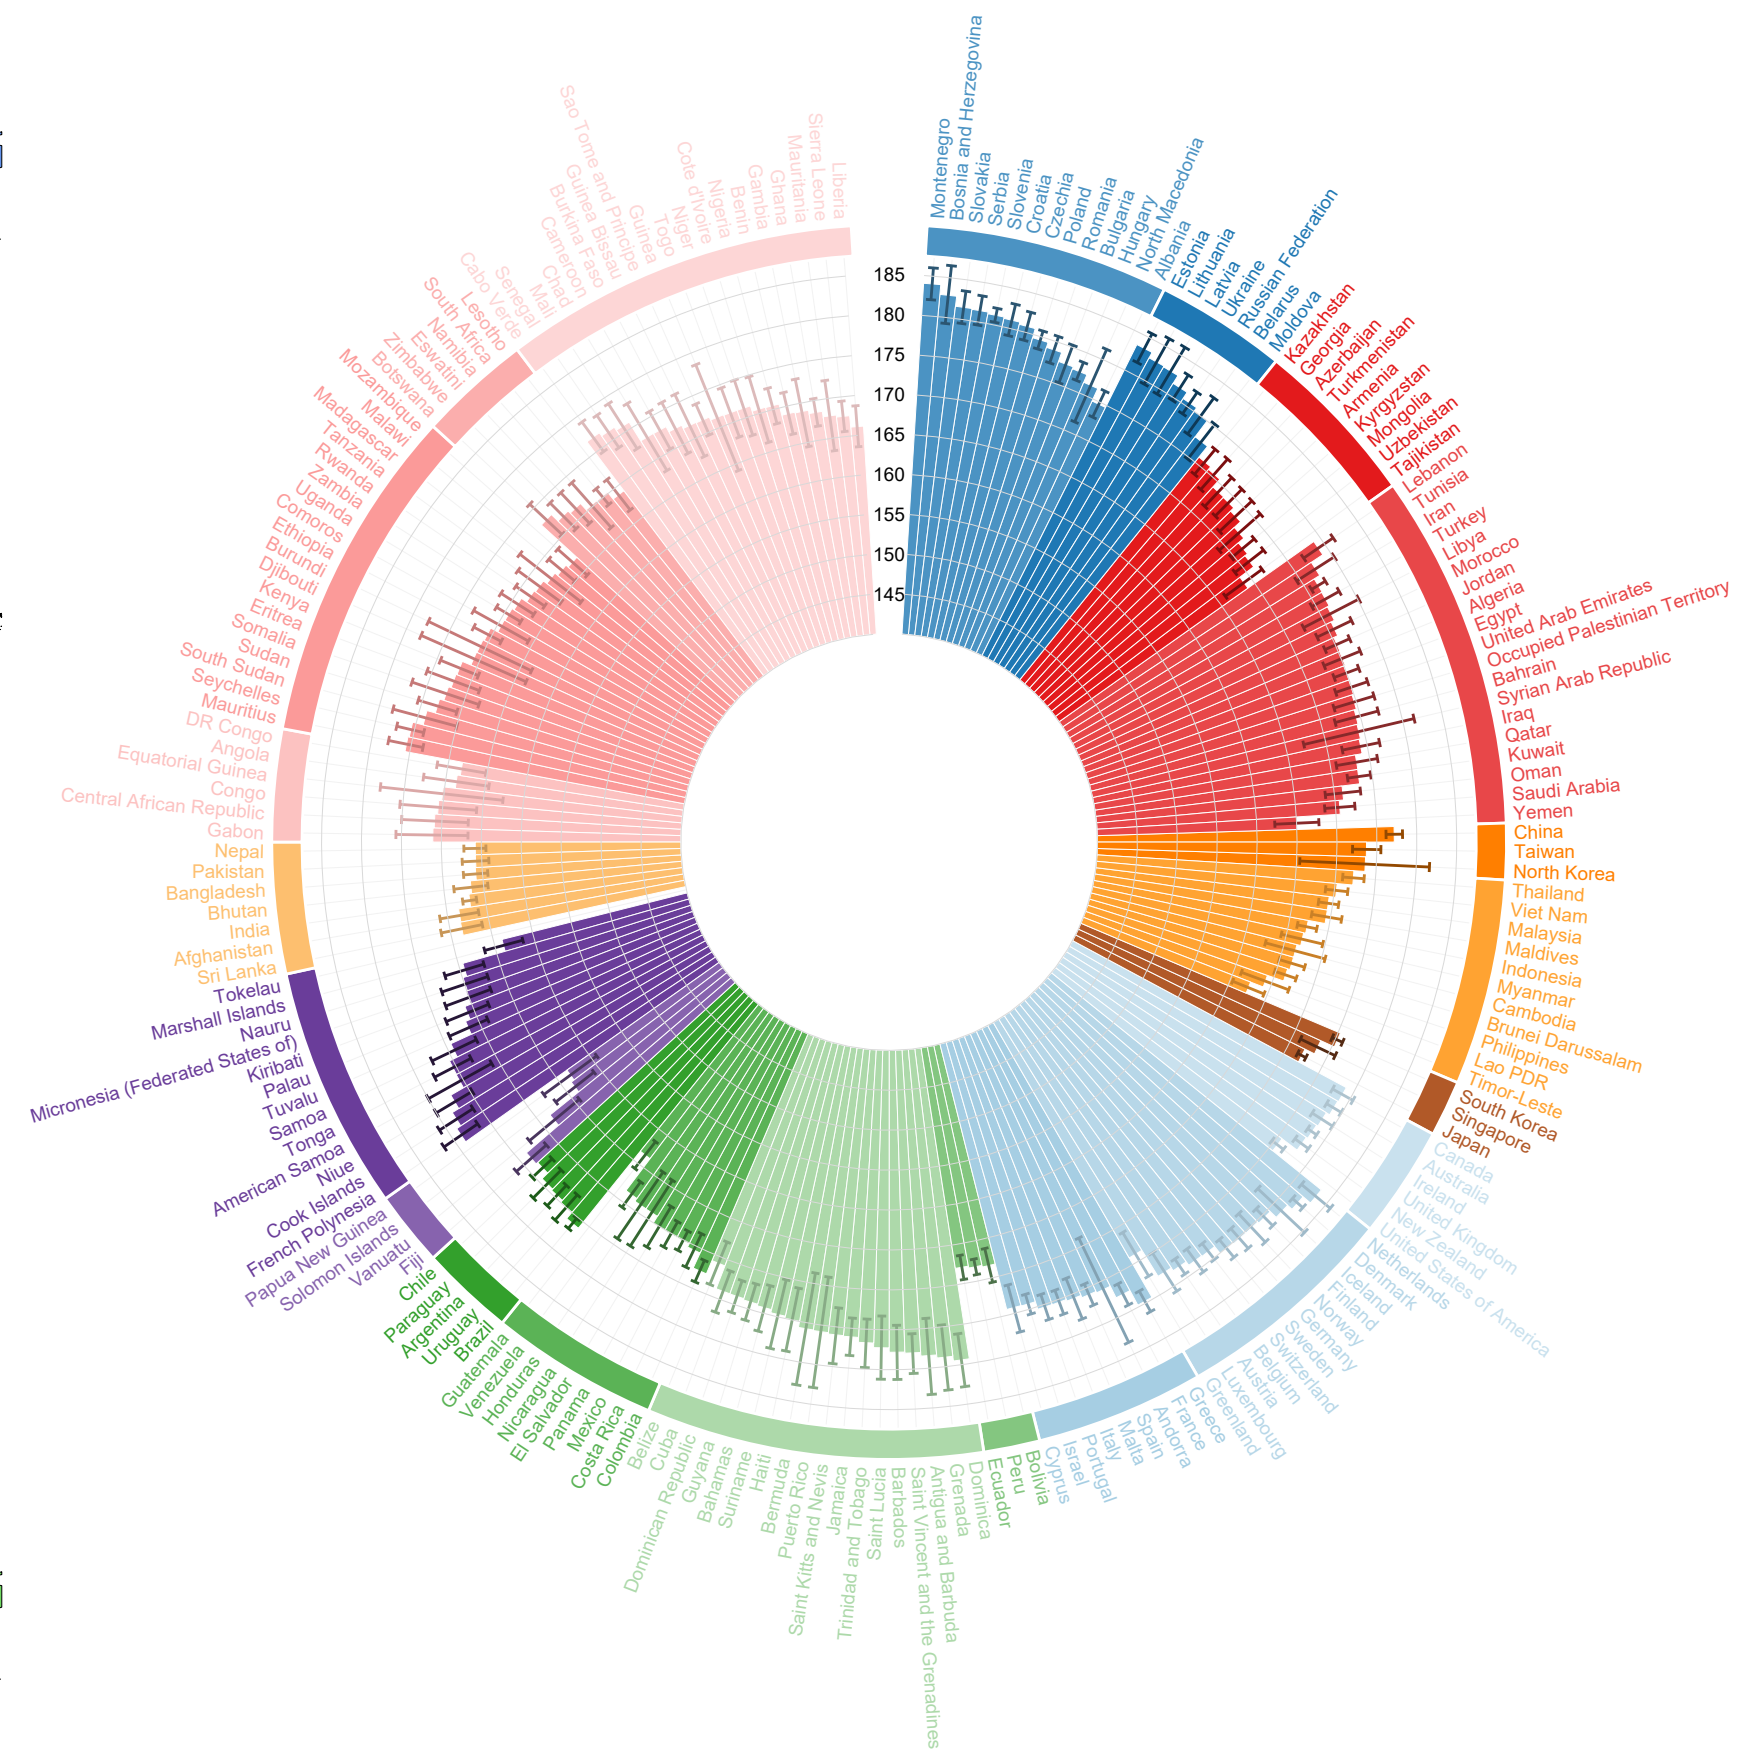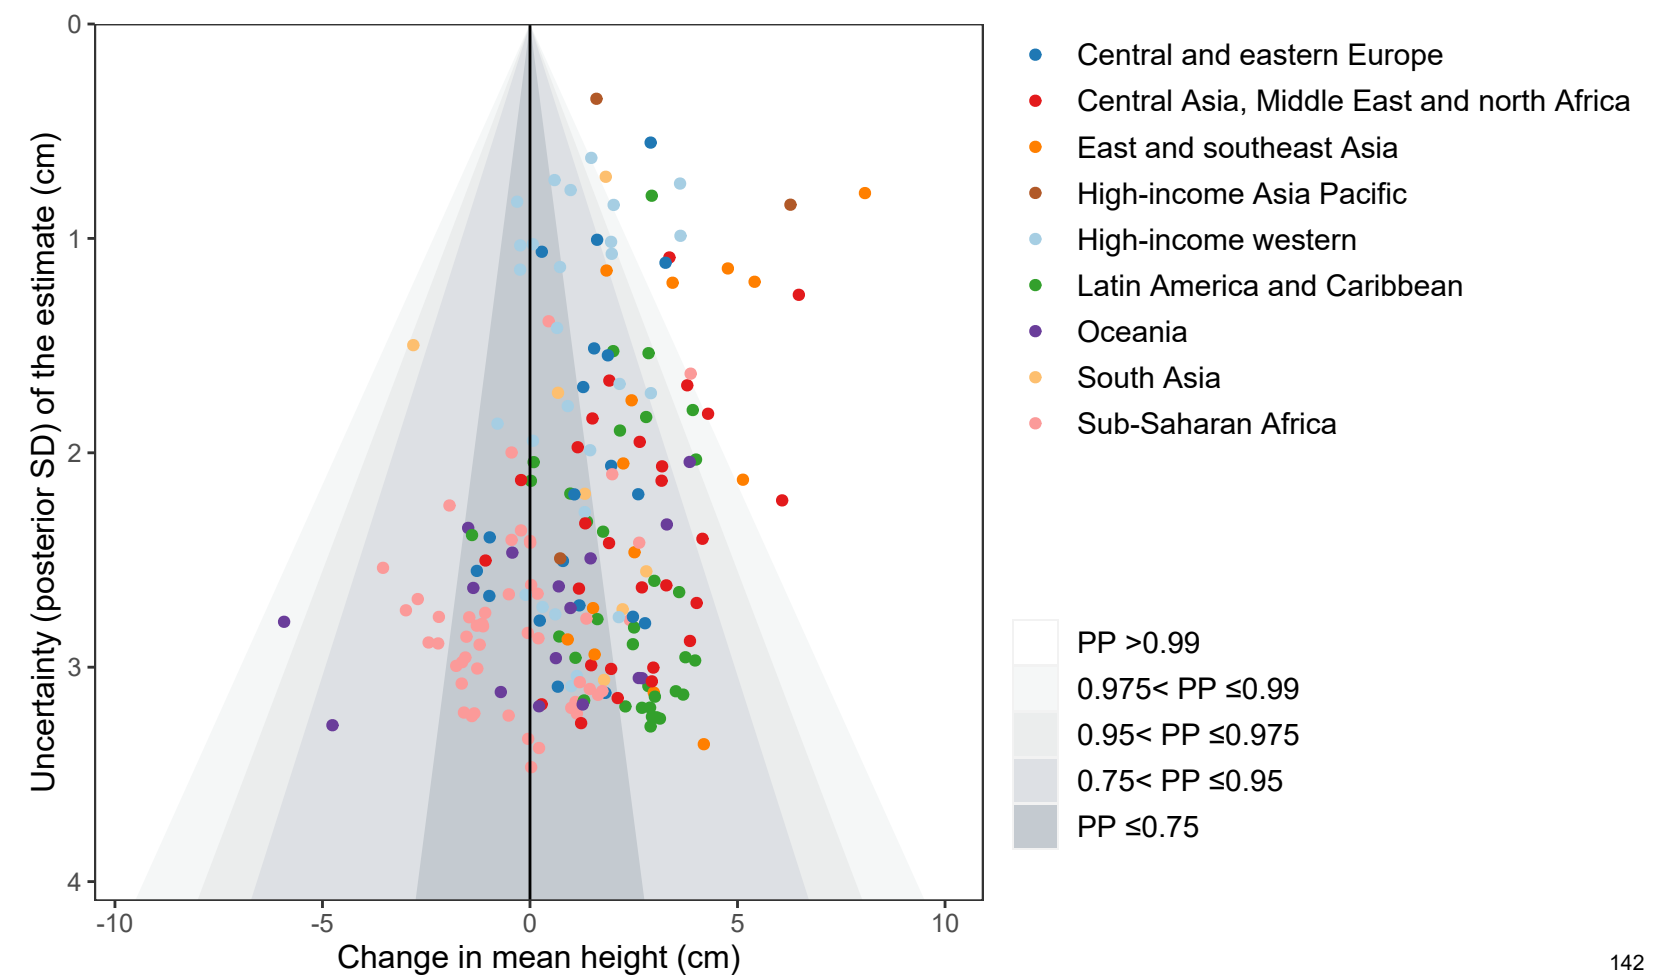



Mean height in 2020 (boys, age 19, rural)

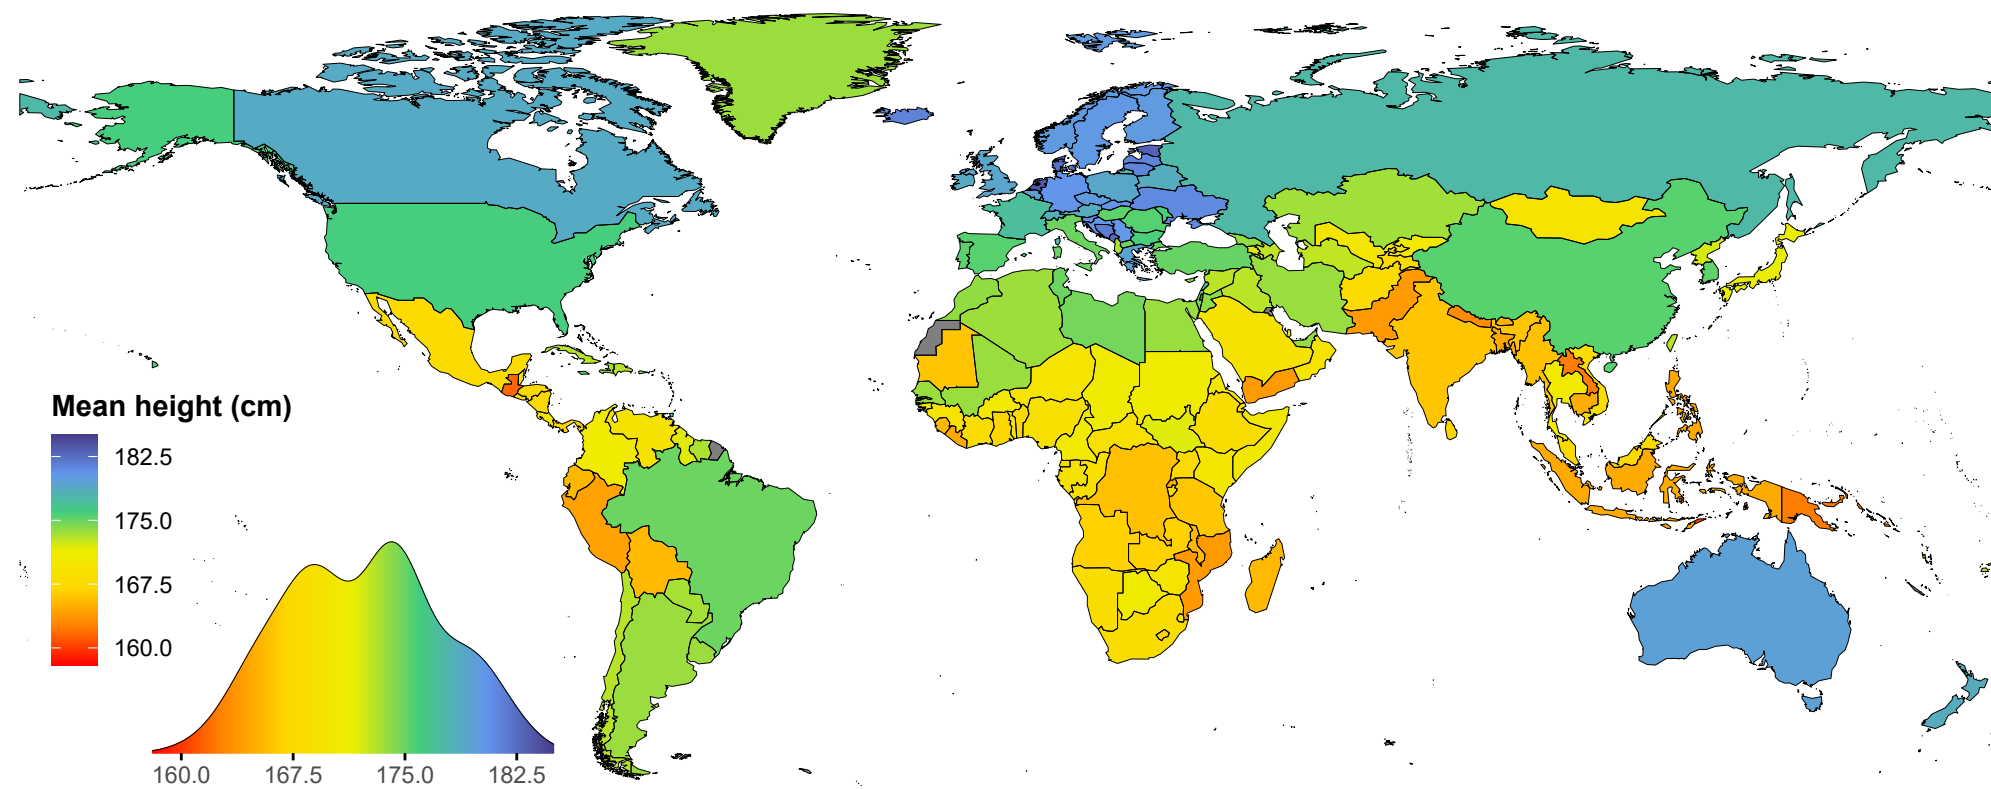

- |                                                          |                                                                        |                                                              |                                                        |
|----------------------------------------------------------|------------------------------------------------------------------------|--------------------------------------------------------------|--------------------------------------------------------|
| <span style="color: #90EE90;">■</span> American Samoa    | <span style="color: #90EE90;">■</span> Fiji                            | <span style="color: #4169E1;">■</span> Montenegro            | <span style="color: #90EE90;">■</span> Seychelles      |
| <span style="color: #90EE90;">■</span> Bahrain           | <span style="color: #4169E1;">■</span> French Polynesia                | <span style="color: #808080;">■</span> Nauru                 | <span style="color: #FF8C00;">■</span> Solomon Islands |
| <span style="color: #808080;">■</span> Bermuda           | <span style="color: #FFD700;">■</span> Kiribati                        | <span style="color: #4682B4;">■</span> Niue                  | <span style="color: #40E0D0;">■</span> Tokelau         |
| <span style="color: #FFD700;">■</span> Brunei Darussalam | <span style="color: #FFD700;">■</span> Maldives                        | <span style="color: #FFD700;">■</span> Palau                 | <span style="color: #90EE90;">■</span> Tonga           |
| <span style="color: #90EE90;">■</span> Cape Verde        | <span style="color: #FF8C00;">■</span> Marshall Islands                | <span style="color: #90EE90;">■</span> Samoa                 | <span style="color: #FFD700;">■</span> Tuvalu          |
| <span style="color: #FFD700;">■</span> Comoros           | <span style="color: #90EE90;">■</span> Mauritius                       | <span style="color: #FFD700;">■</span> Sao Tome and Principe | <span style="color: #FFD700;">■</span> Vanuatu         |
| <span style="color: #4682B4;">■</span> Cook Islands      | <span style="color: #FFD700;">■</span> Mirconesia, Federated States of |                                                              |                                                        |

Change 1990-2020 (boys, age 19, rural)

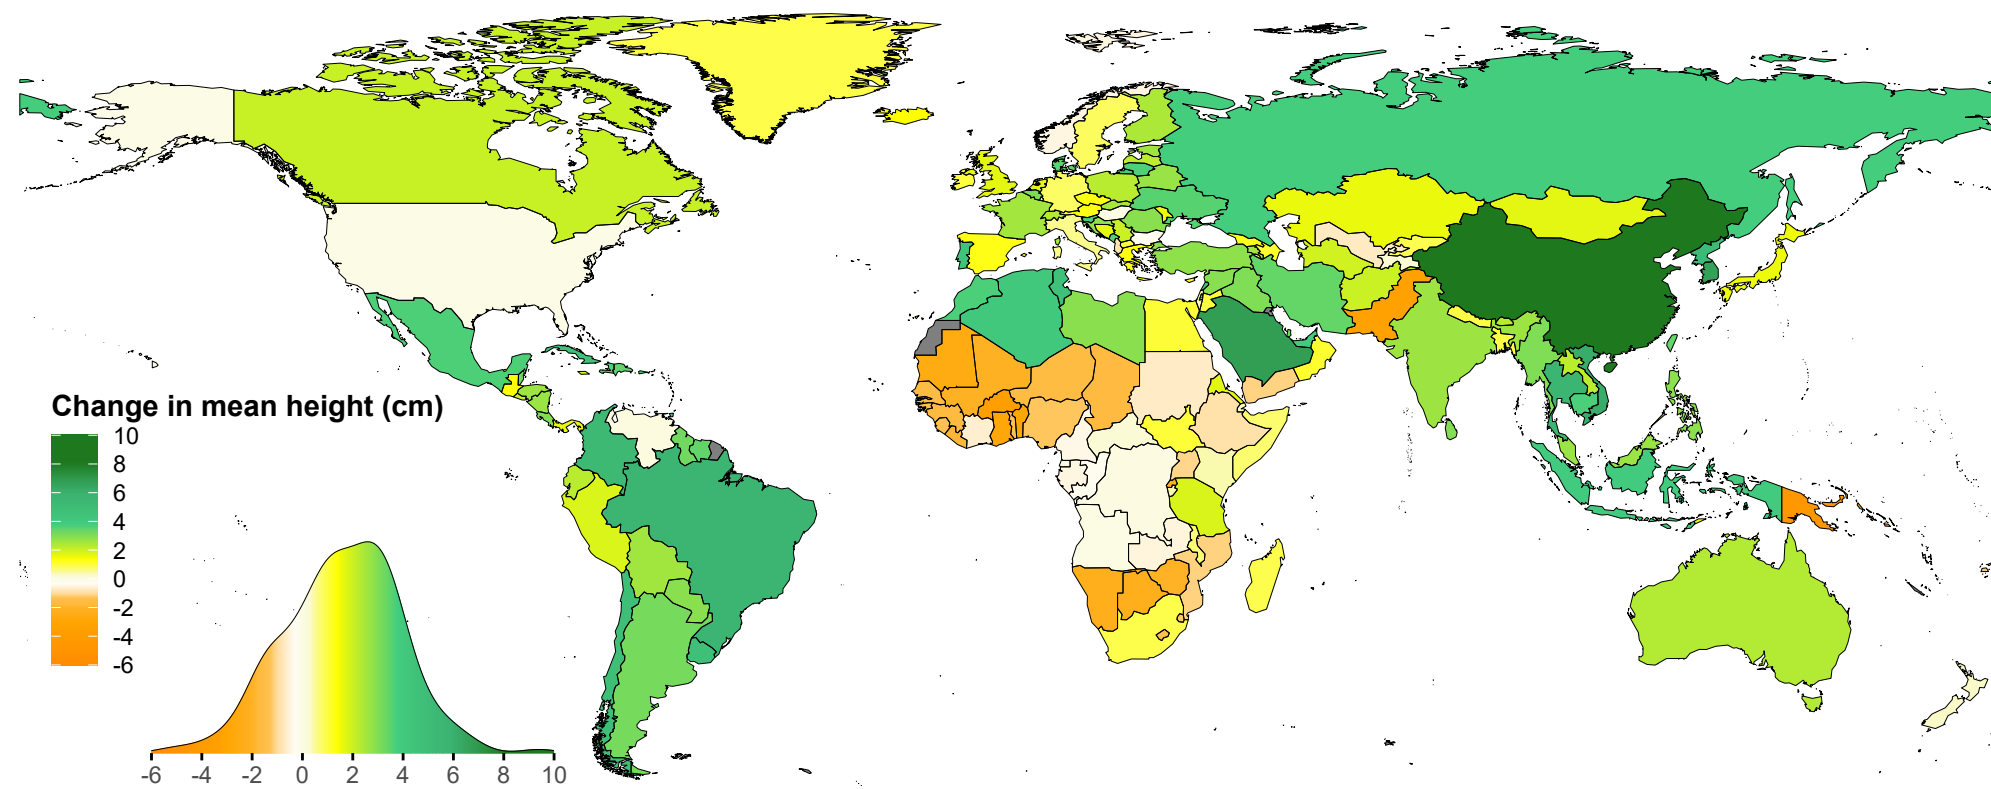

- |                                                          |                                                                        |                                                              |                                                        |
|----------------------------------------------------------|------------------------------------------------------------------------|--------------------------------------------------------------|--------------------------------------------------------|
| <span style="color: #FFFF00;">■</span> American Samoa    | <span style="color: #FF8C00;">■</span> Fiji                            | <span style="color: #4682B4;">■</span> Montenegro            | <span style="color: #FFFF00;">■</span> Seychelles      |
| <span style="color: #4682B4;">■</span> Bahrain           | <span style="color: #90EE90;">■</span> French Polynesia                | <span style="color: #808080;">■</span> Nauru                 | <span style="color: #FF8C00;">■</span> Solomon Islands |
| <span style="color: #808080;">■</span> Bermuda           | <span style="color: #FFFF00;">■</span> Kiribati                        | <span style="color: #90EE90;">■</span> Niue                  | <span style="color: #90EE90;">■</span> Tokelau         |
| <span style="color: #90EE90;">■</span> Brunei Darussalam | <span style="color: #4682B4;">■</span> Maldives                        | <span style="color: #FFFF00;">■</span> Palau                 | <span style="color: #FFFF00;">■</span> Tonga           |
| <span style="color: #FFFF00;">■</span> Cape Verde        | <span style="color: #FF8C00;">■</span> Marshall Islands                | <span style="color: #4682B4;">■</span> Samoa                 | <span style="color: #FFFF00;">■</span> Tuvalu          |
| <span style="color: #FFFF00;">■</span> Comoros           | <span style="color: #90EE90;">■</span> Mauritius                       | <span style="color: #FF8C00;">■</span> Sao Tome and Principe | <span style="color: #FFFF00;">■</span> Vanuatu         |
| <span style="color: #4682B4;">■</span> Cook Islands      | <span style="color: #FFD700;">■</span> Mirconesia, Federated States of |                                                              |                                                        |

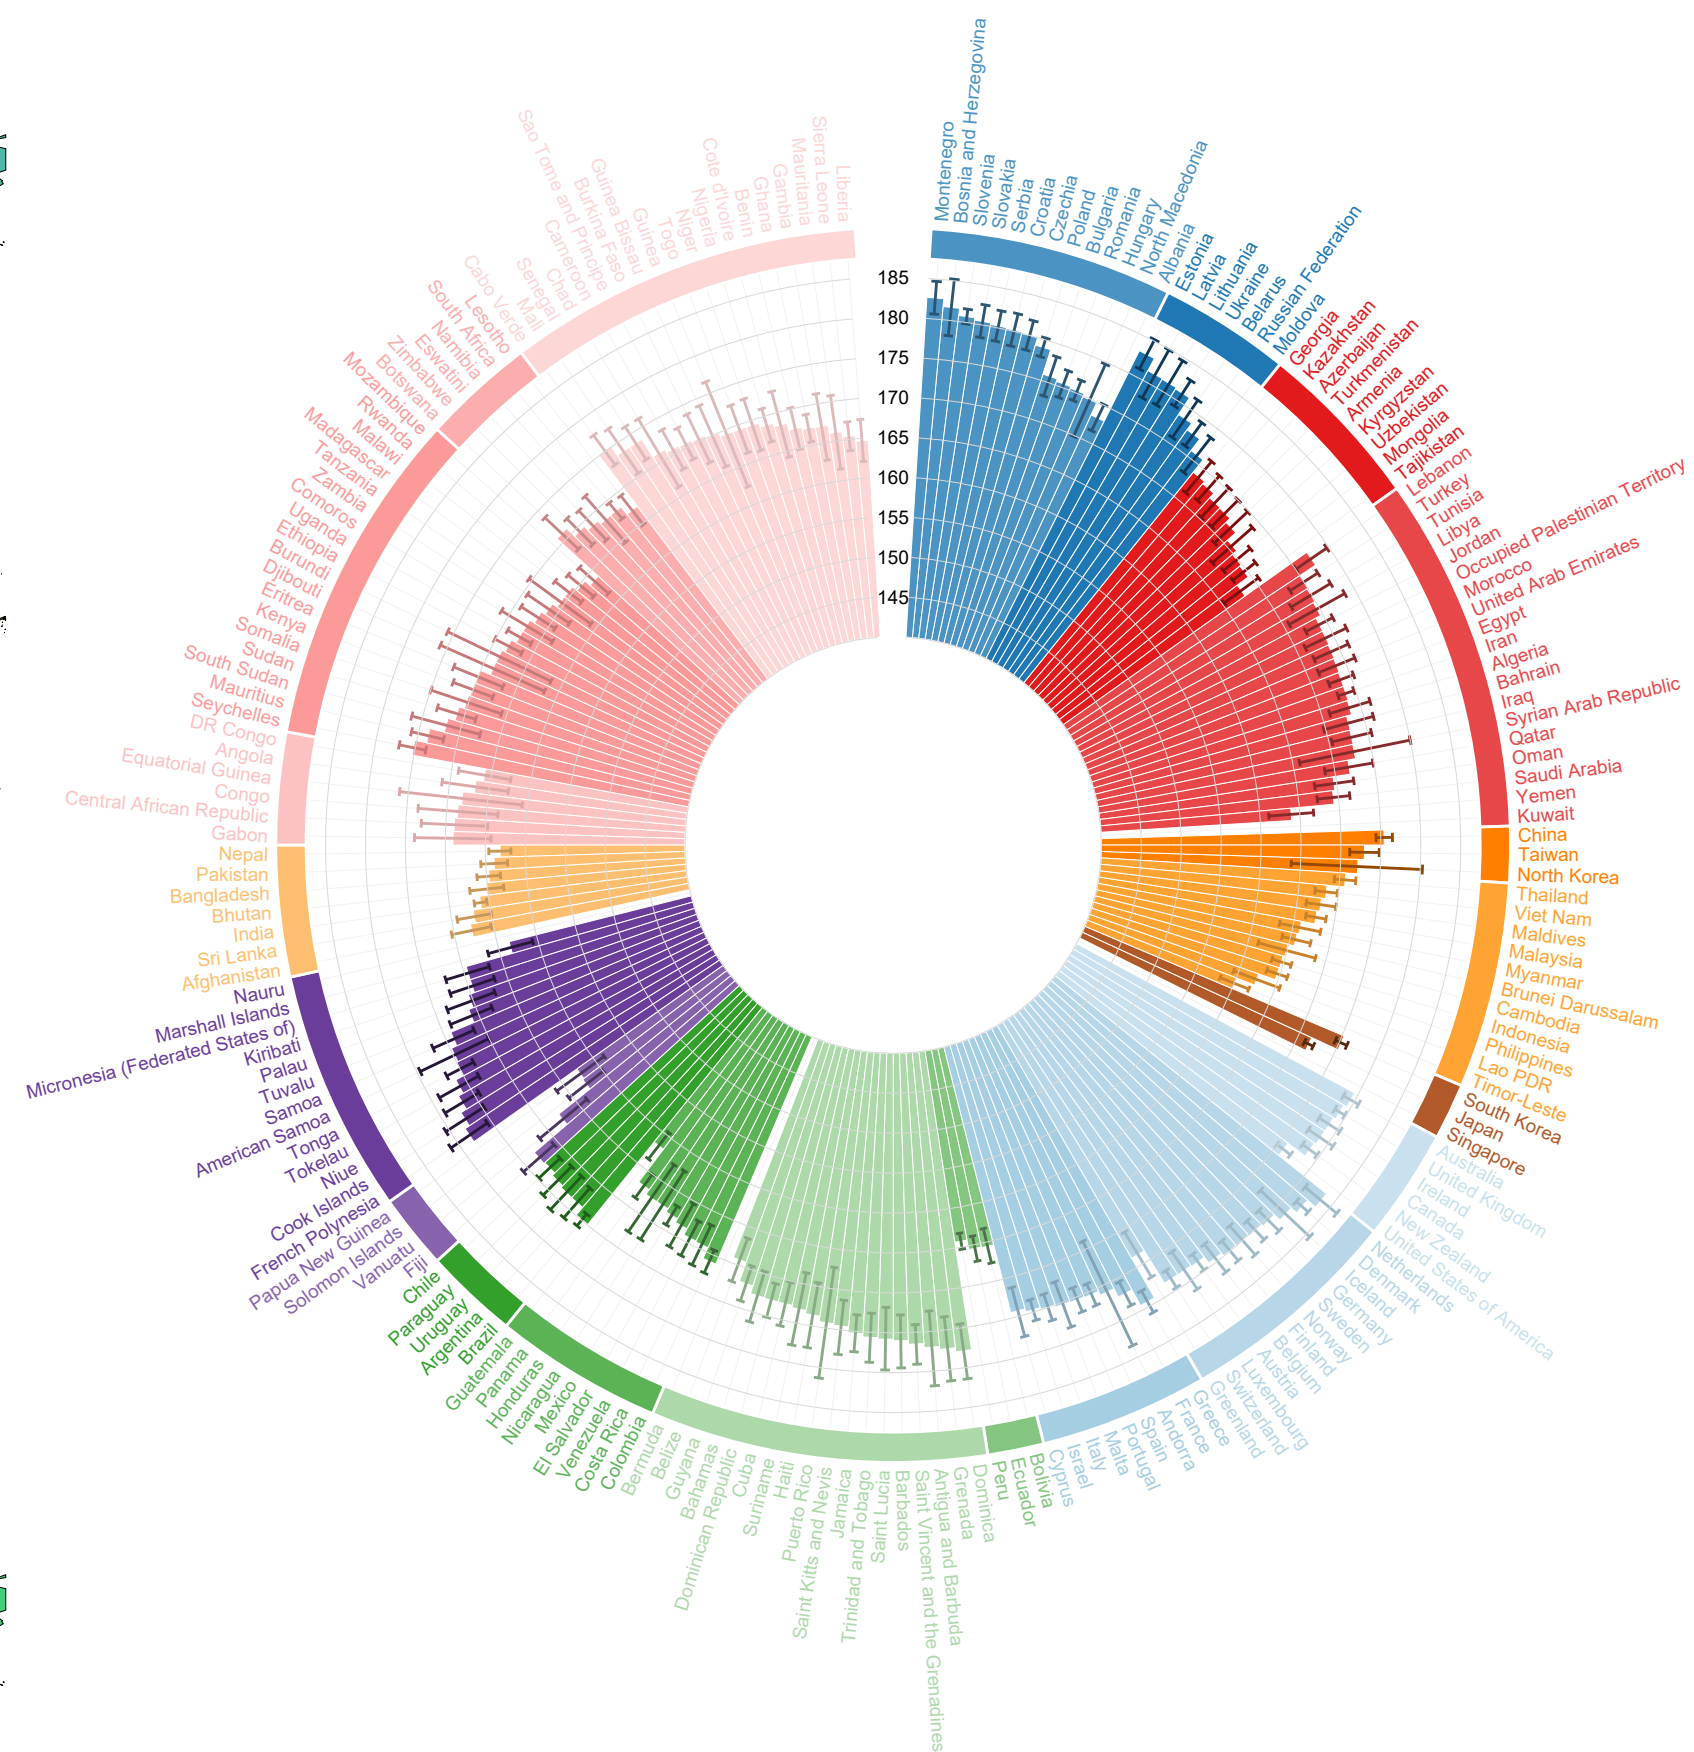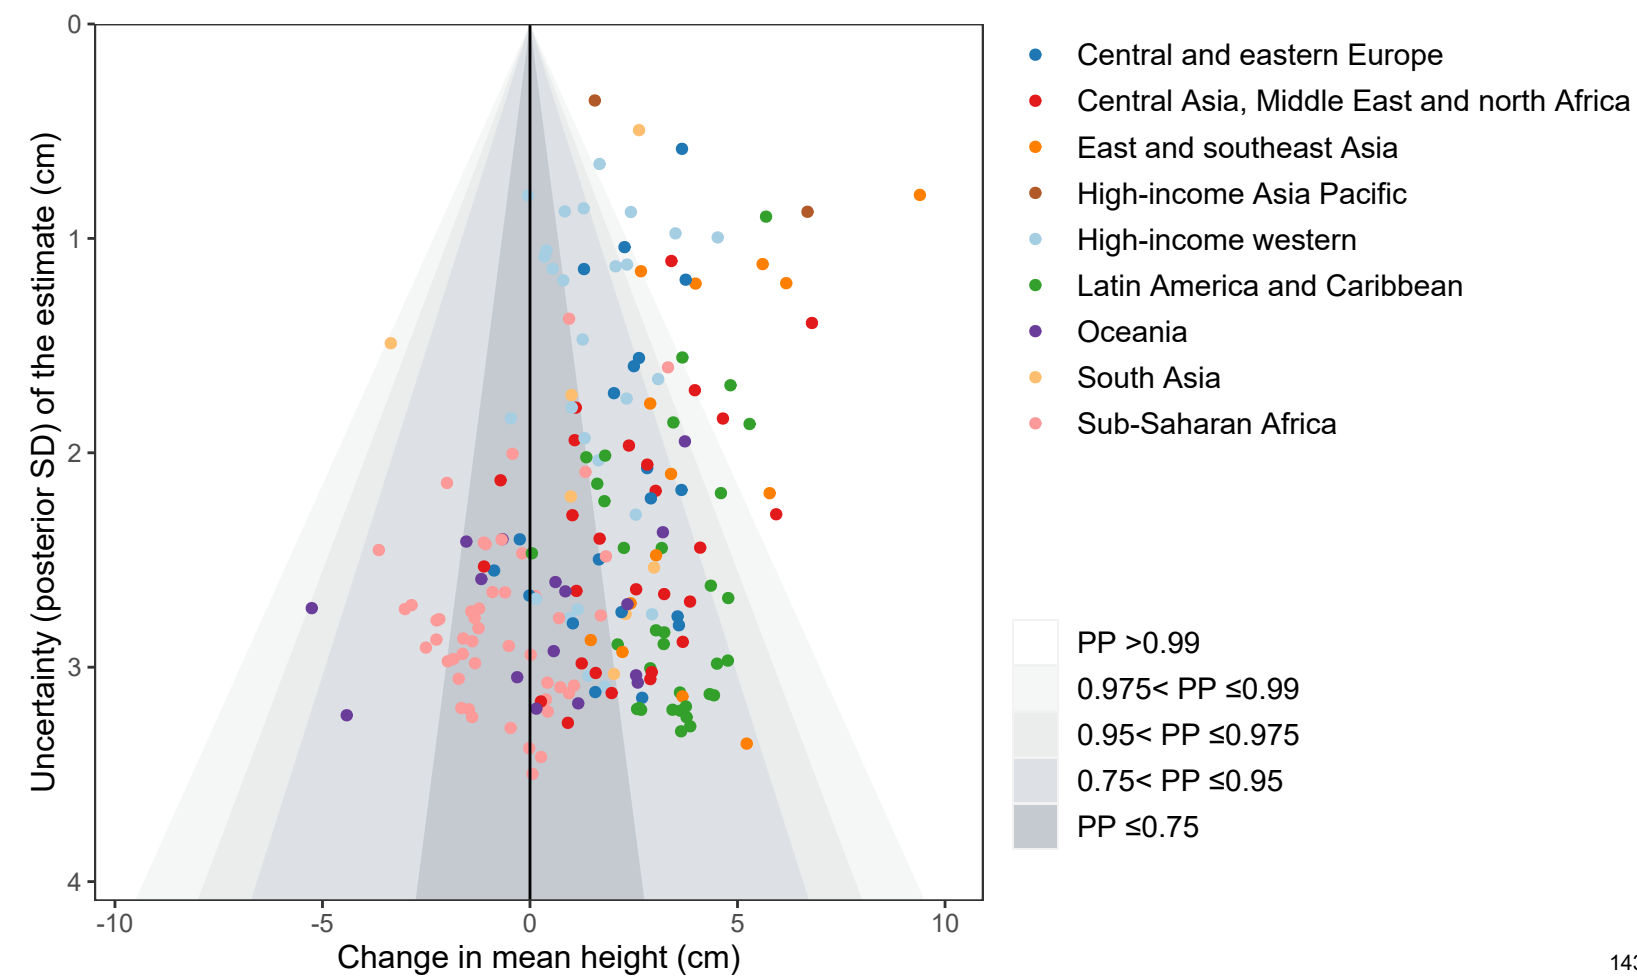

**Supplementary Figure 6.** Urban and rural body-mass index (BMI) in 2020 and change from 1990 to 2020, by age.

The maps show mean BMI in 2020 and change from 1990 to 2020, by urban and rural place of residence and country for girls and boys at ages 5, 10, 15 and 19 years. See Supplementary Figure 5 caption for descriptions of other sections of the figure.

We did not estimate mean rural BMI in areas classified as entirely urban (Bermuda, Kuwait, Nauru and Singapore), mean urban BMI in areas classified as entirely rural (Tokelau), or their change over time in these areas, as indicated by grey colour.



Mean BMI in 2020 (girls, age 5, urban)

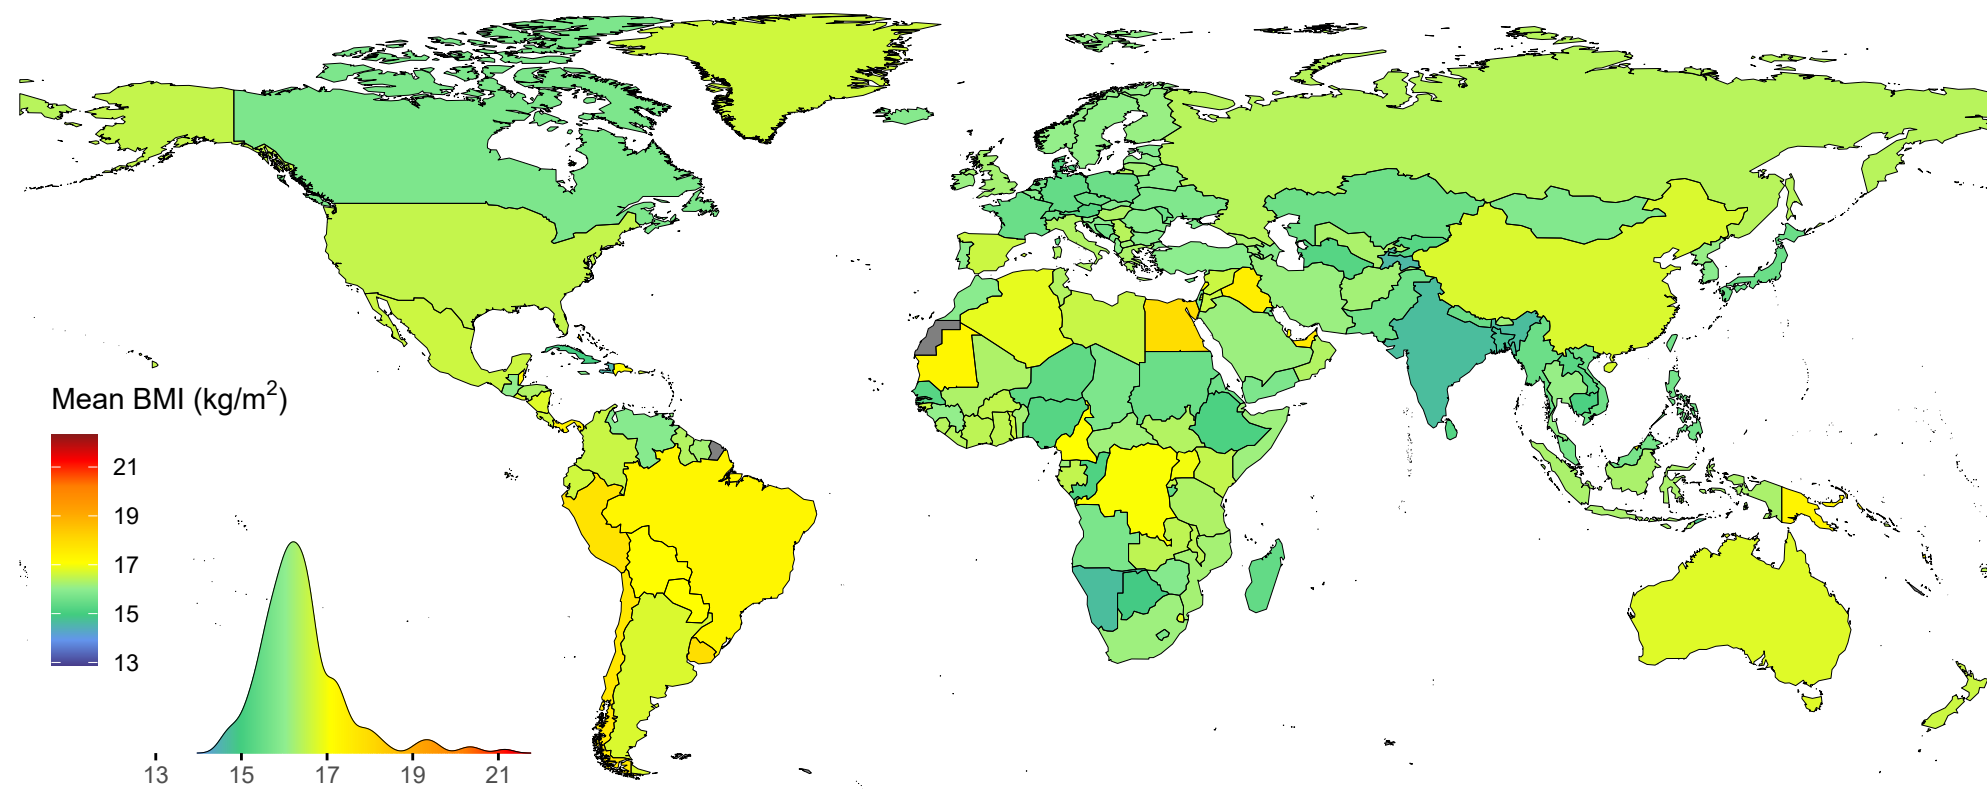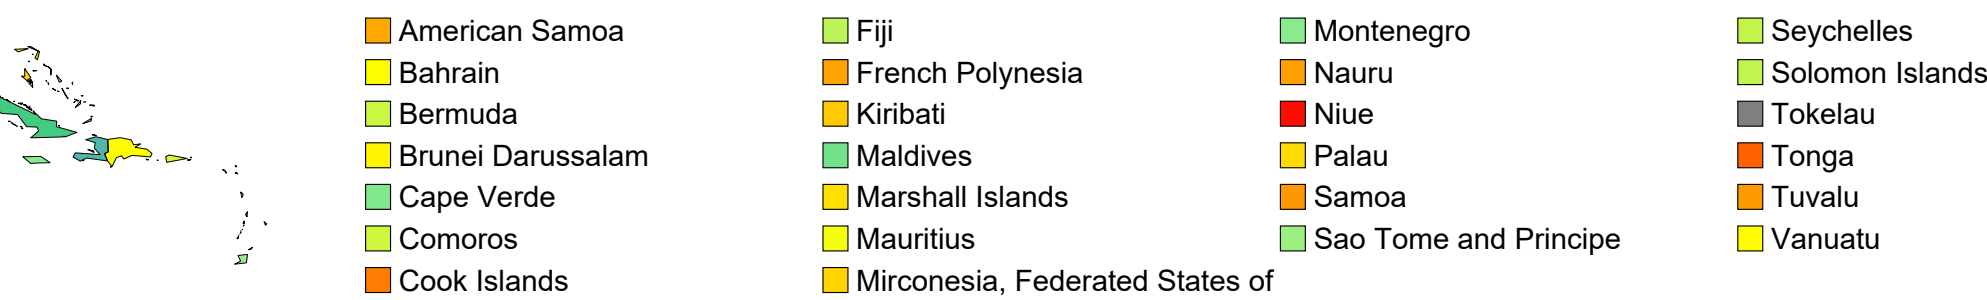

Change 1990-2020 (girls, age 5, urban)

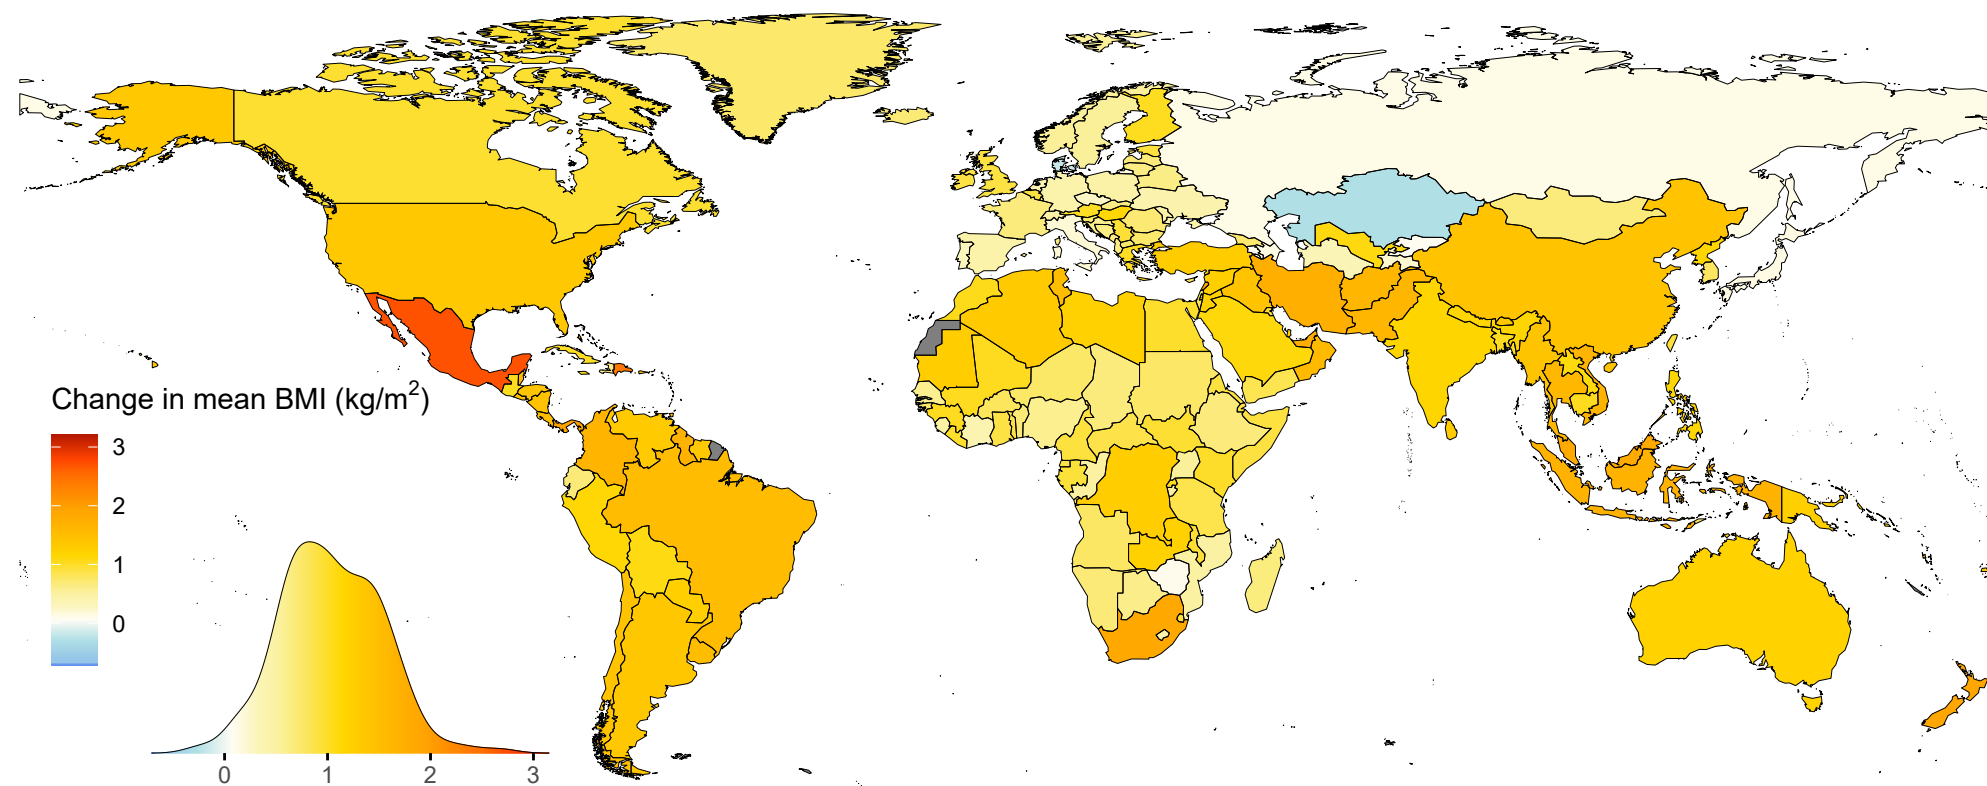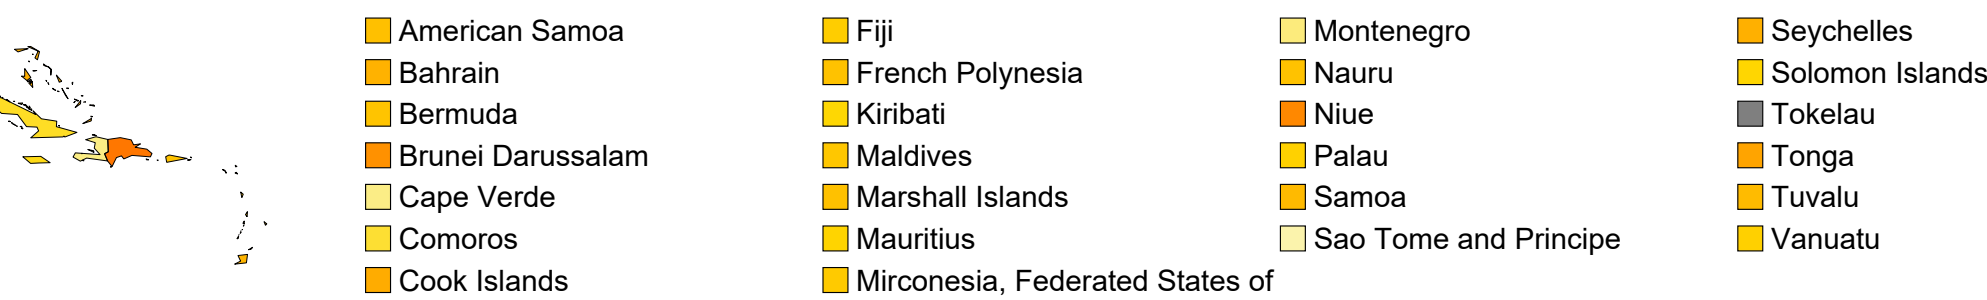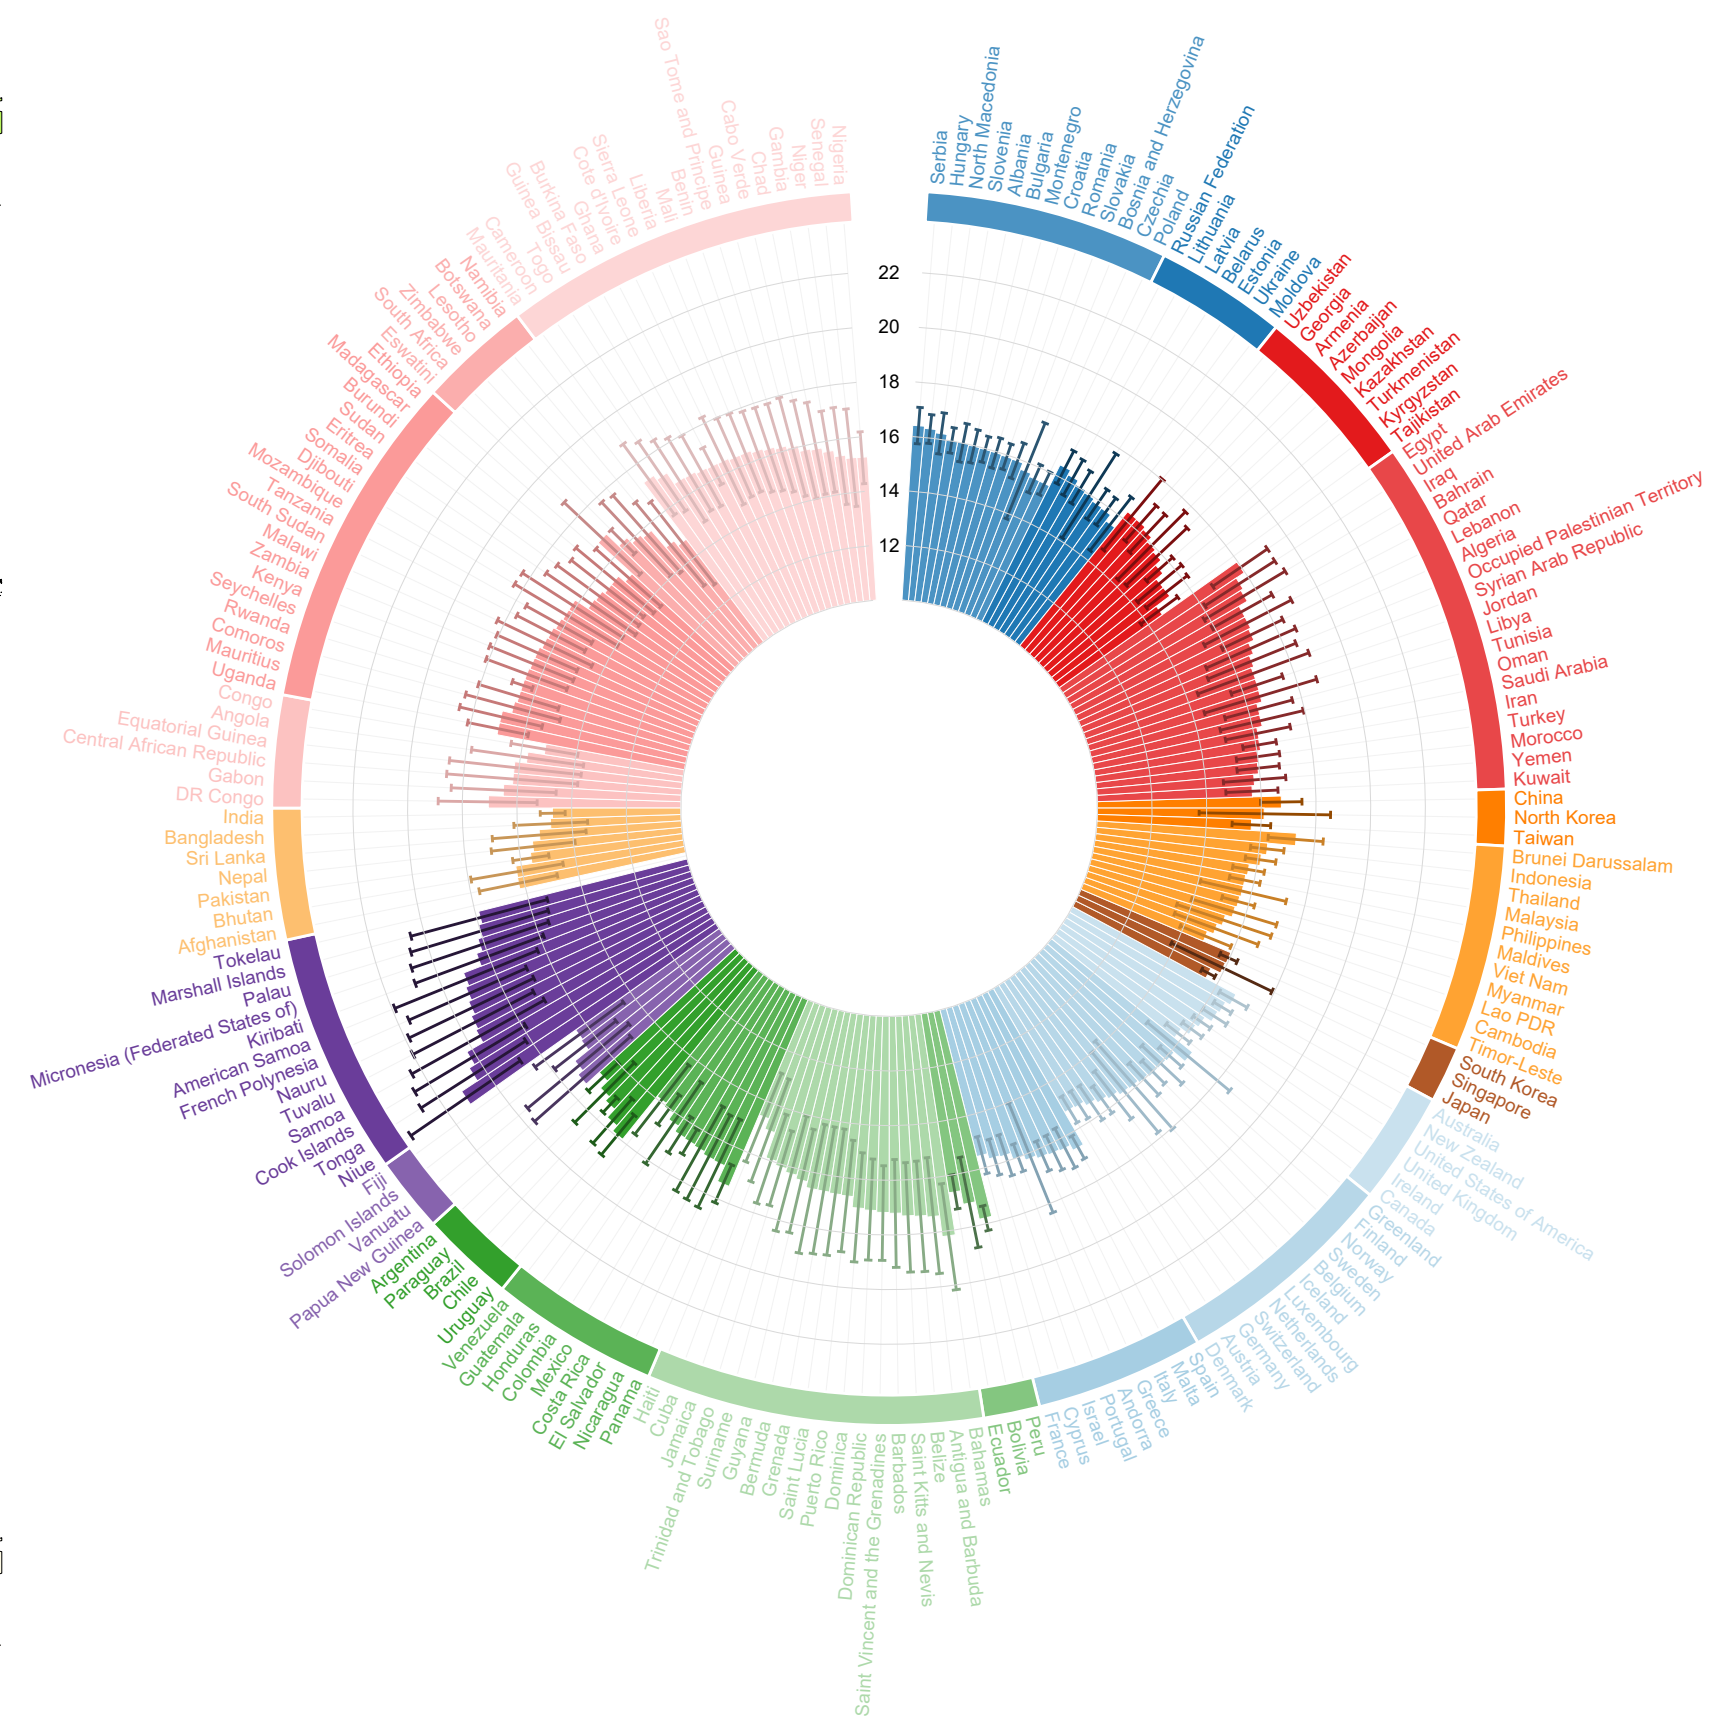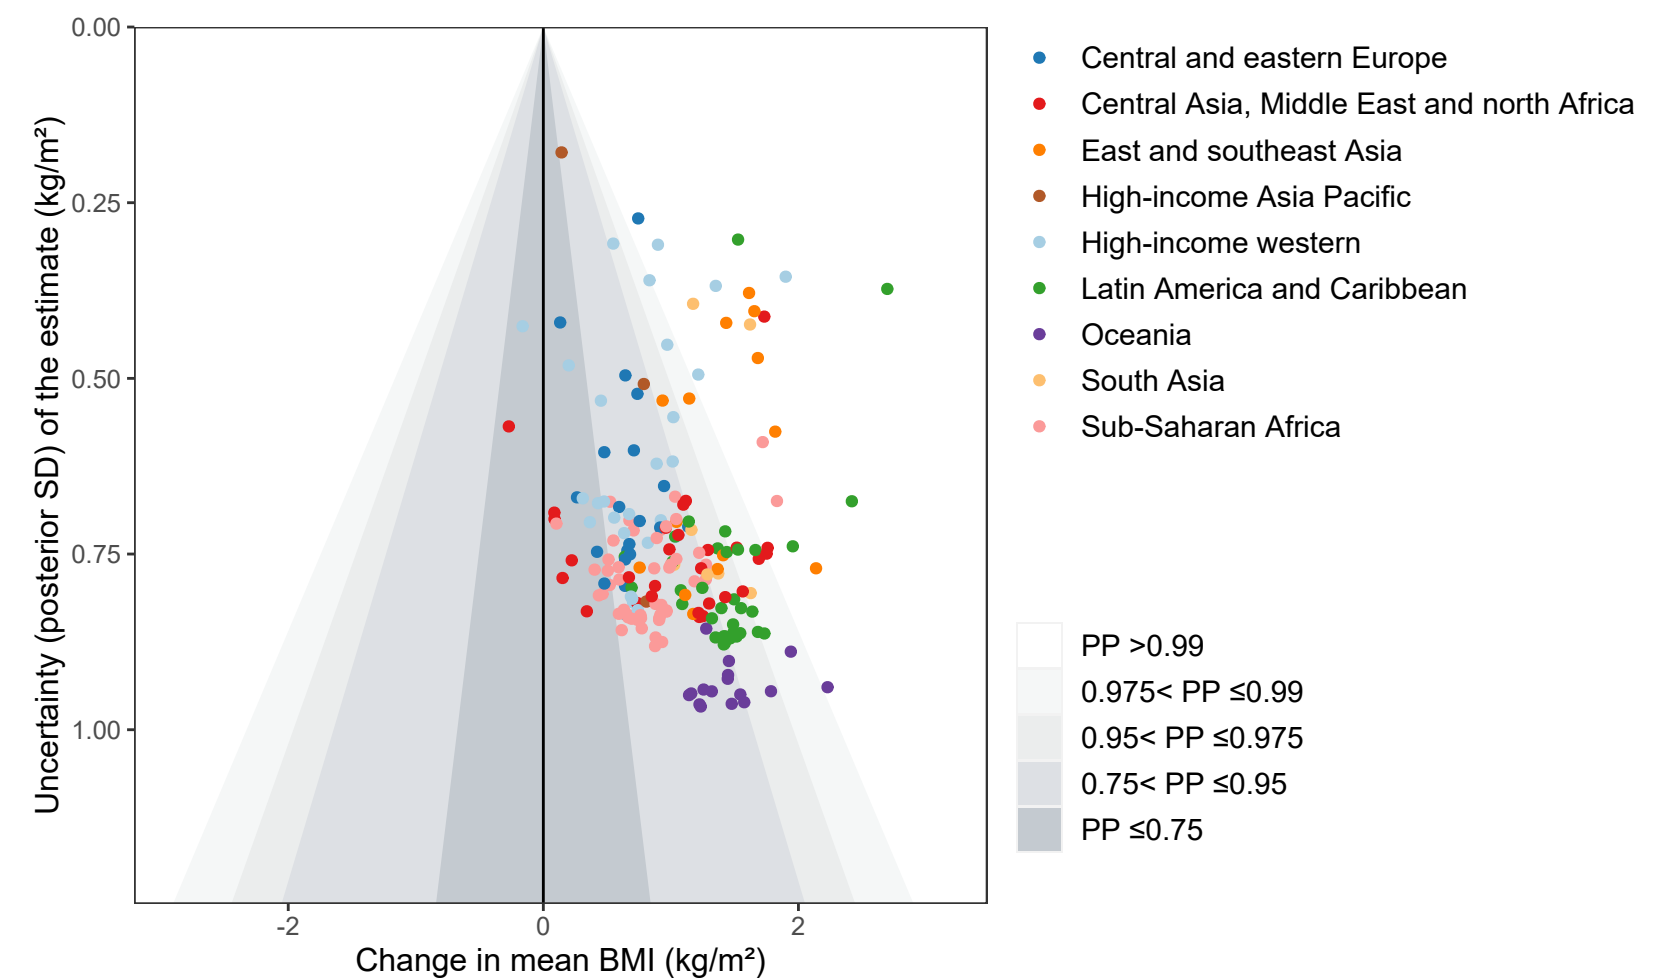



Mean BMI in 2020 (girls, age 5, rural)

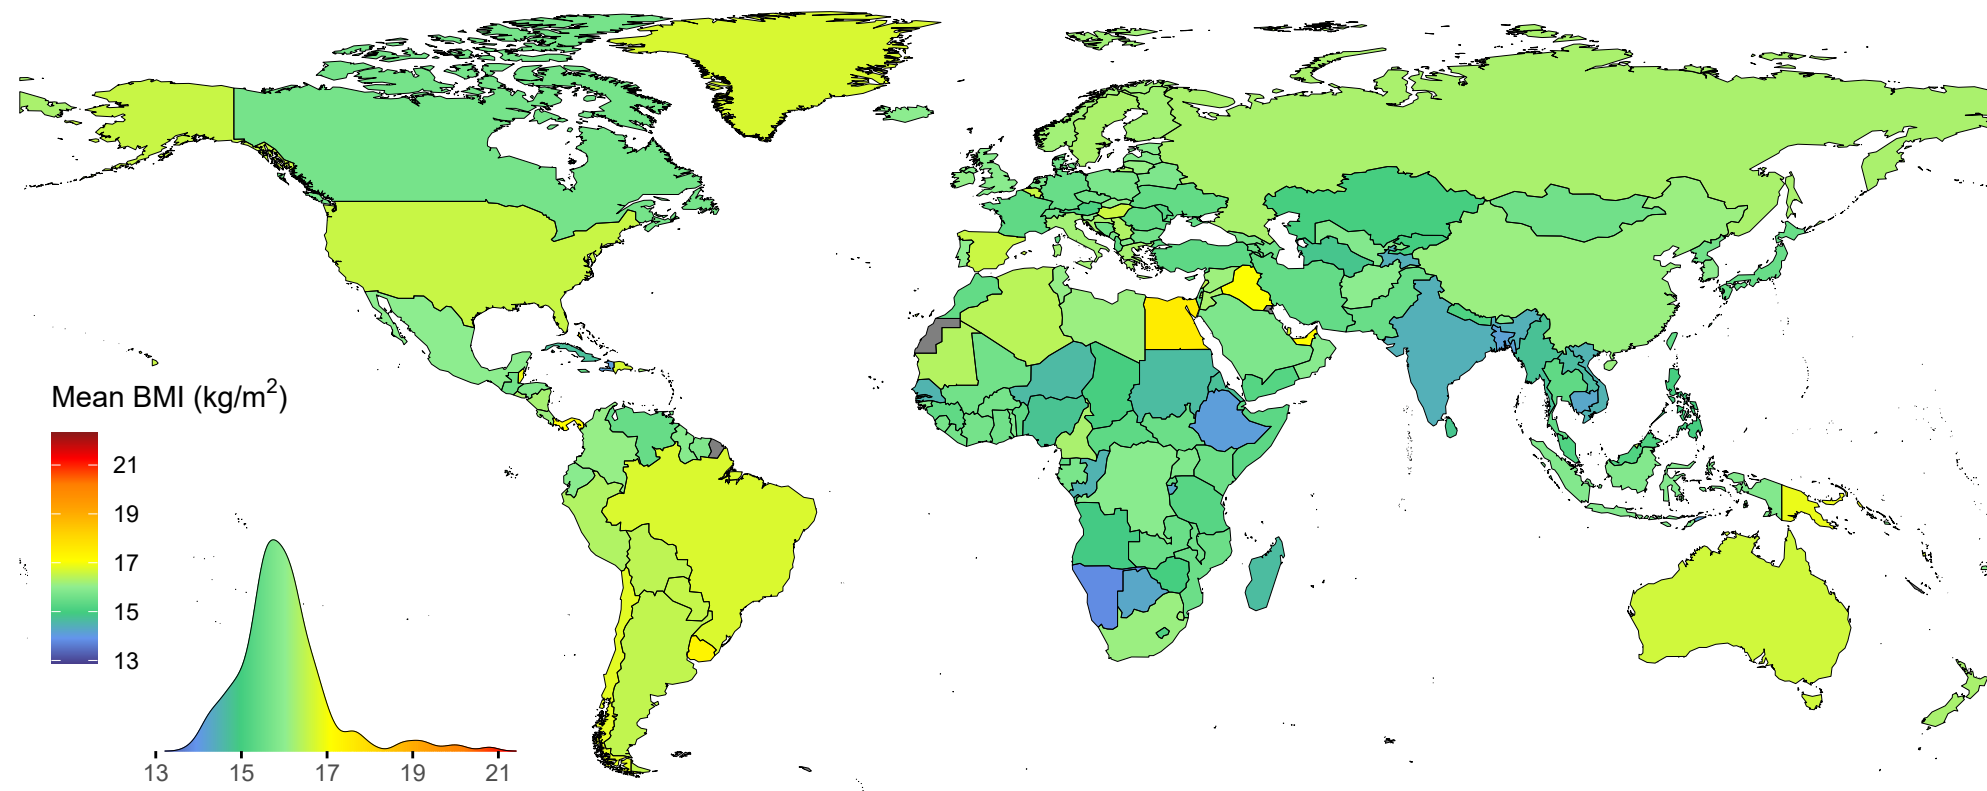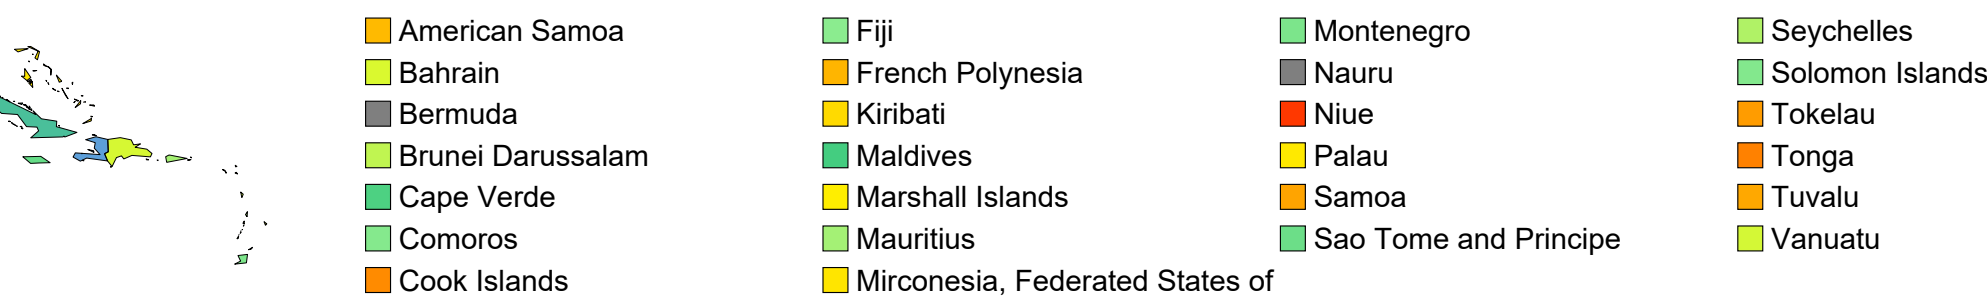

Change 1990-2020 (girls, age 5, rural)

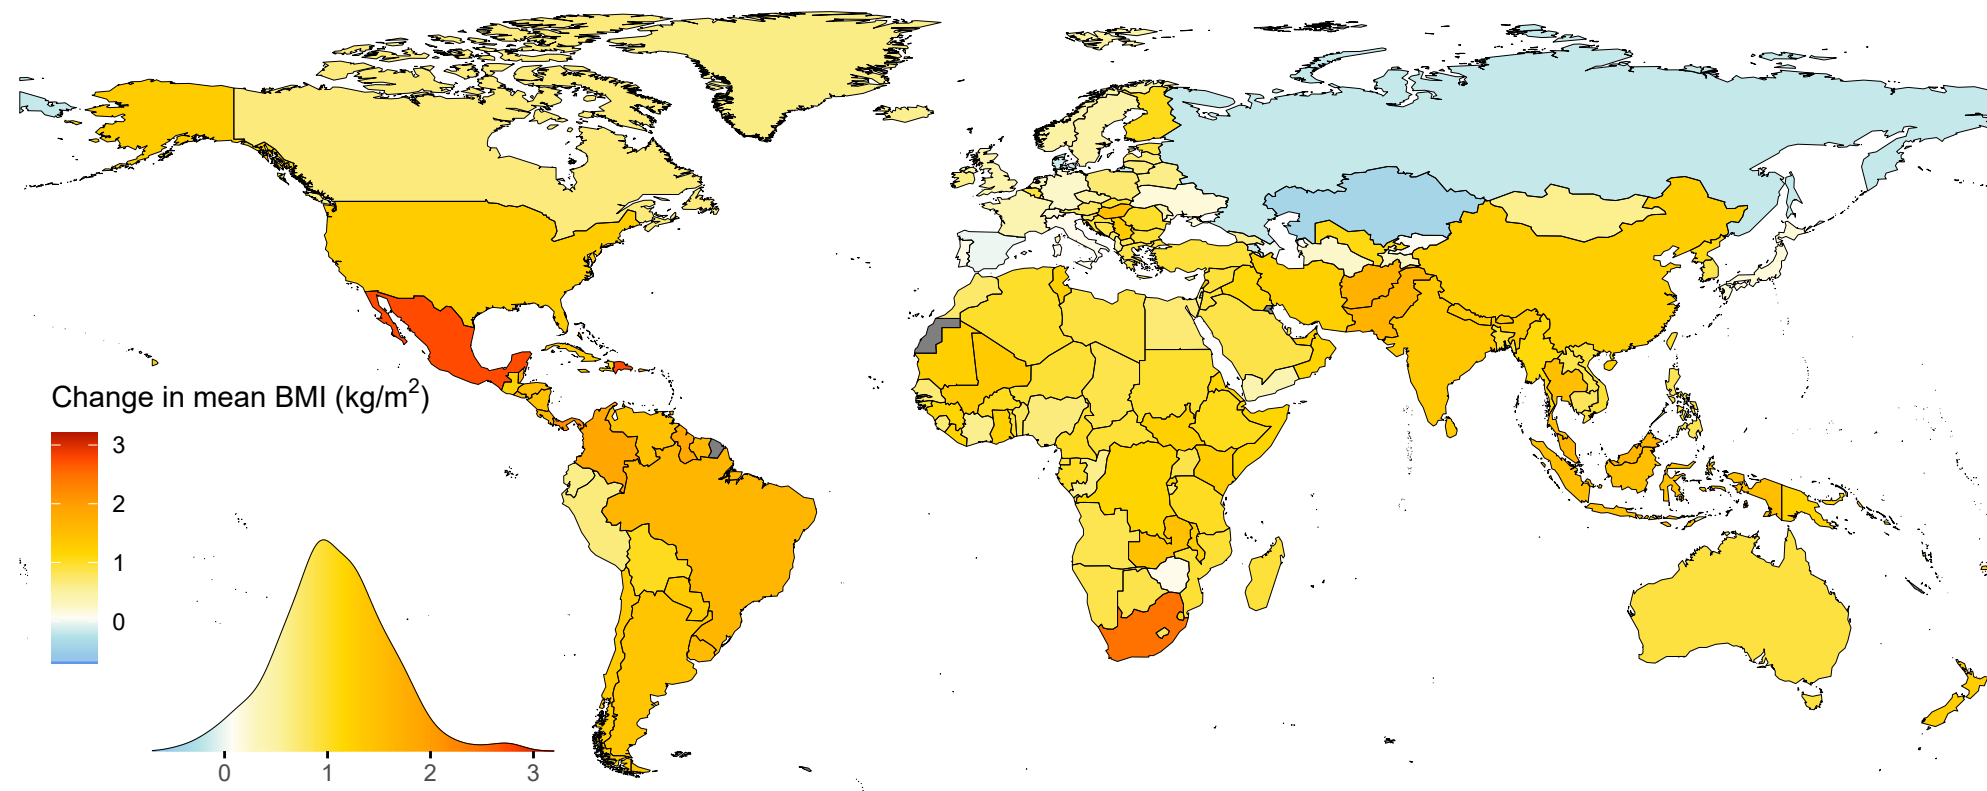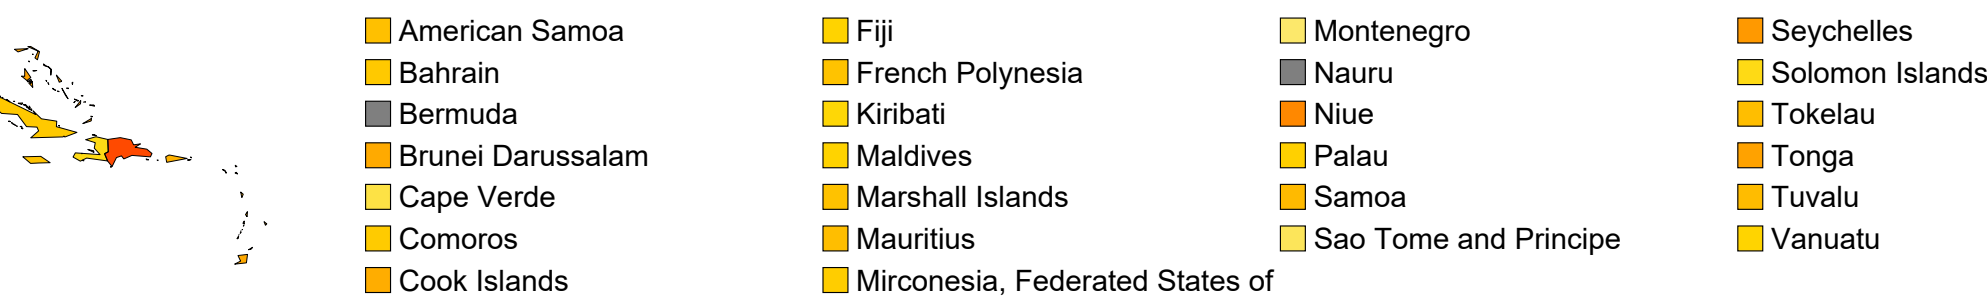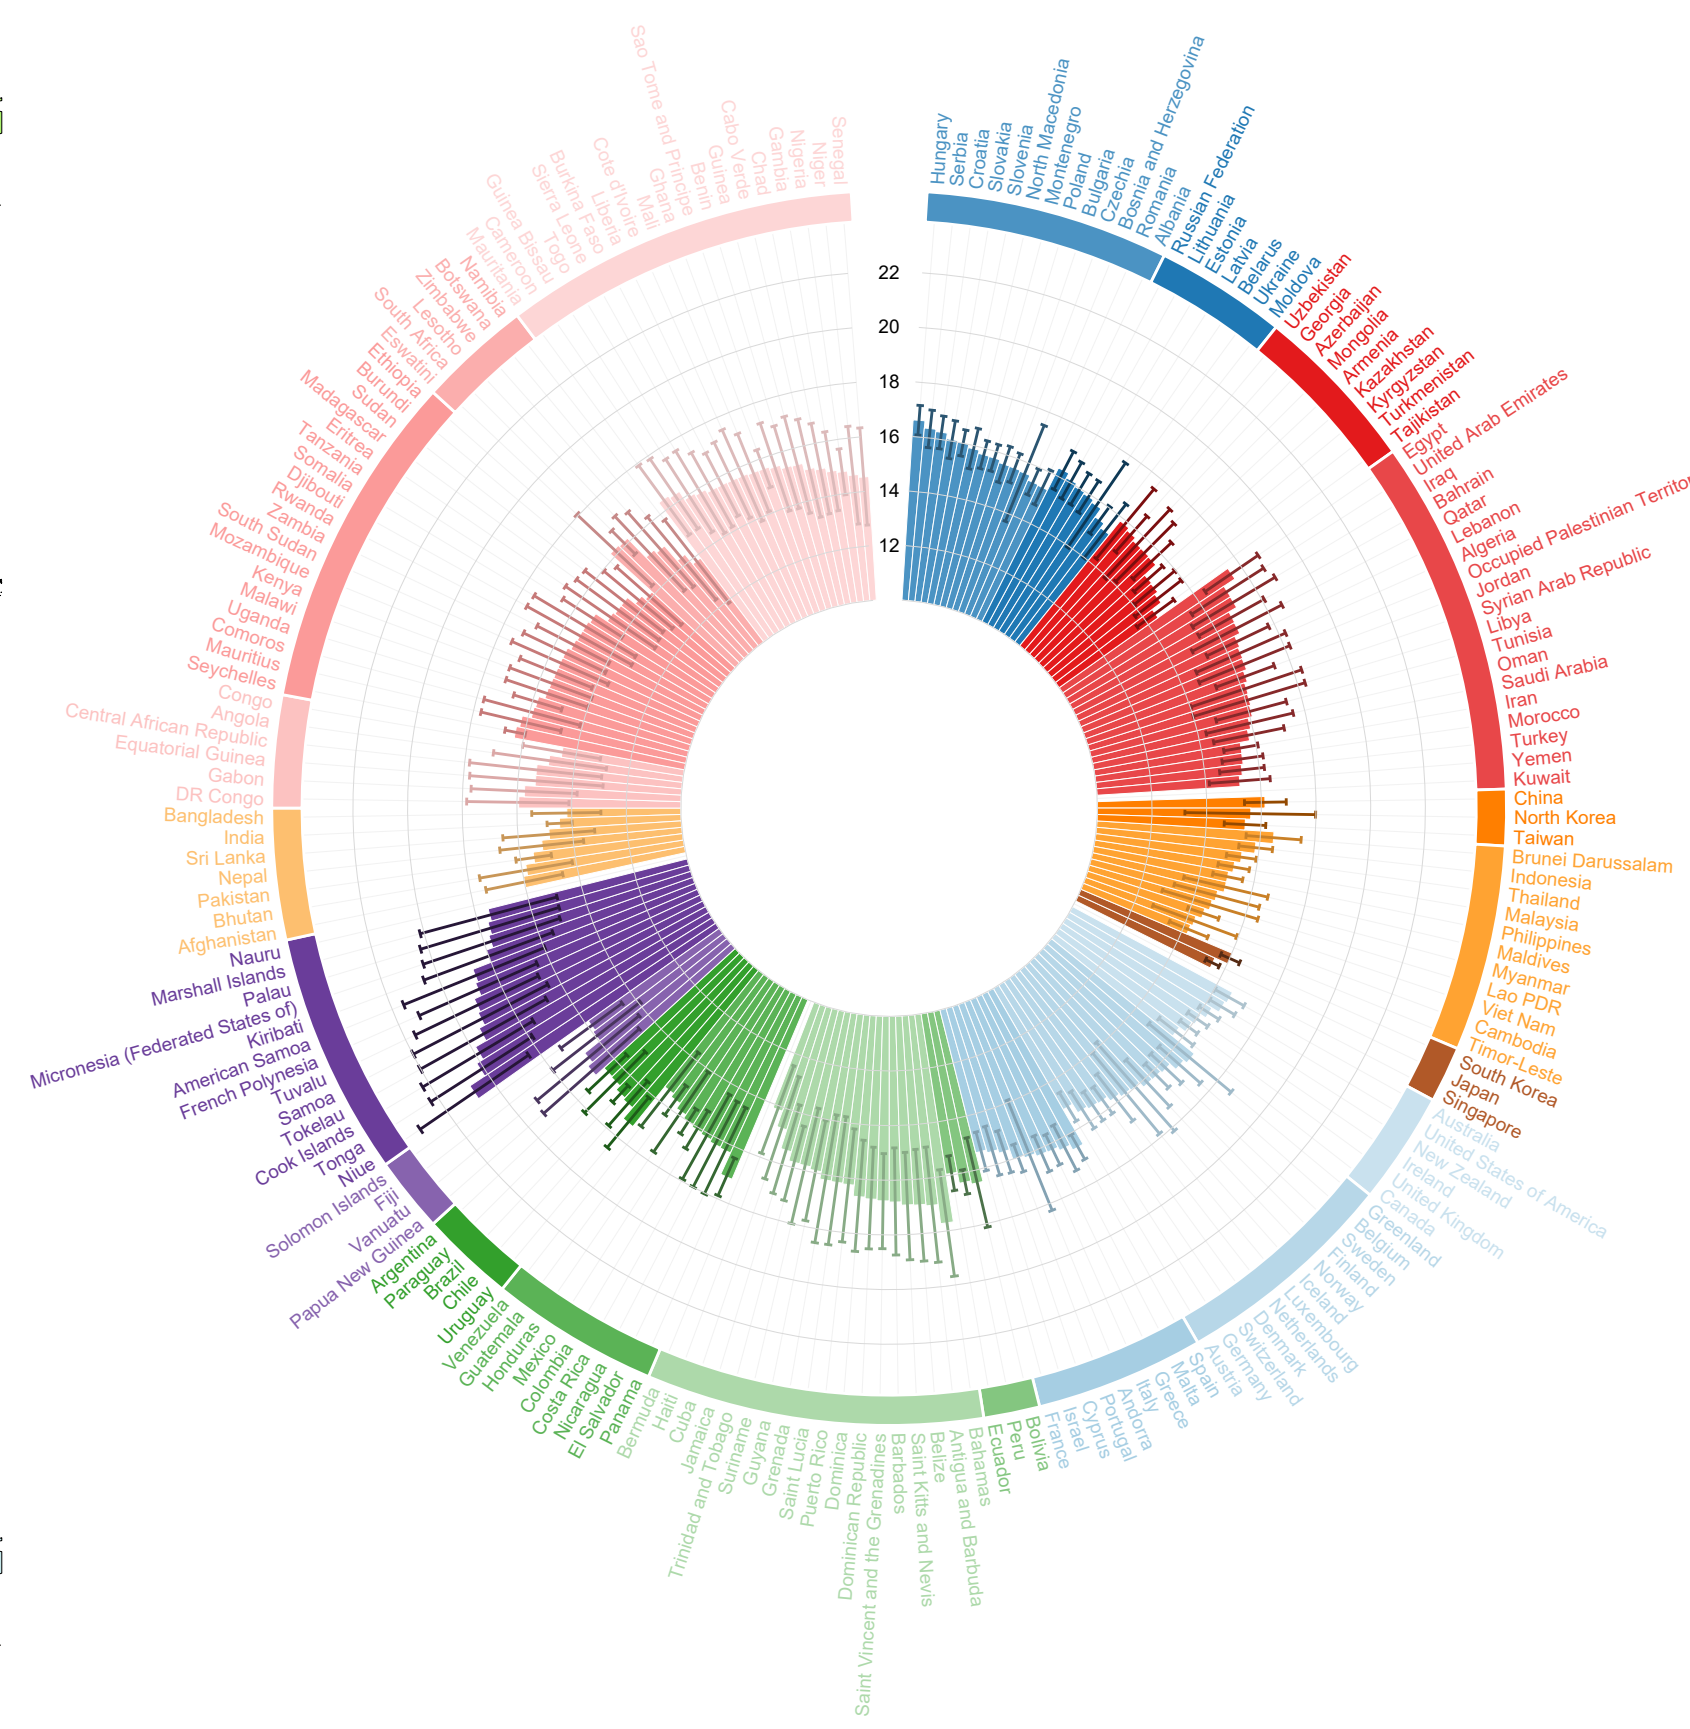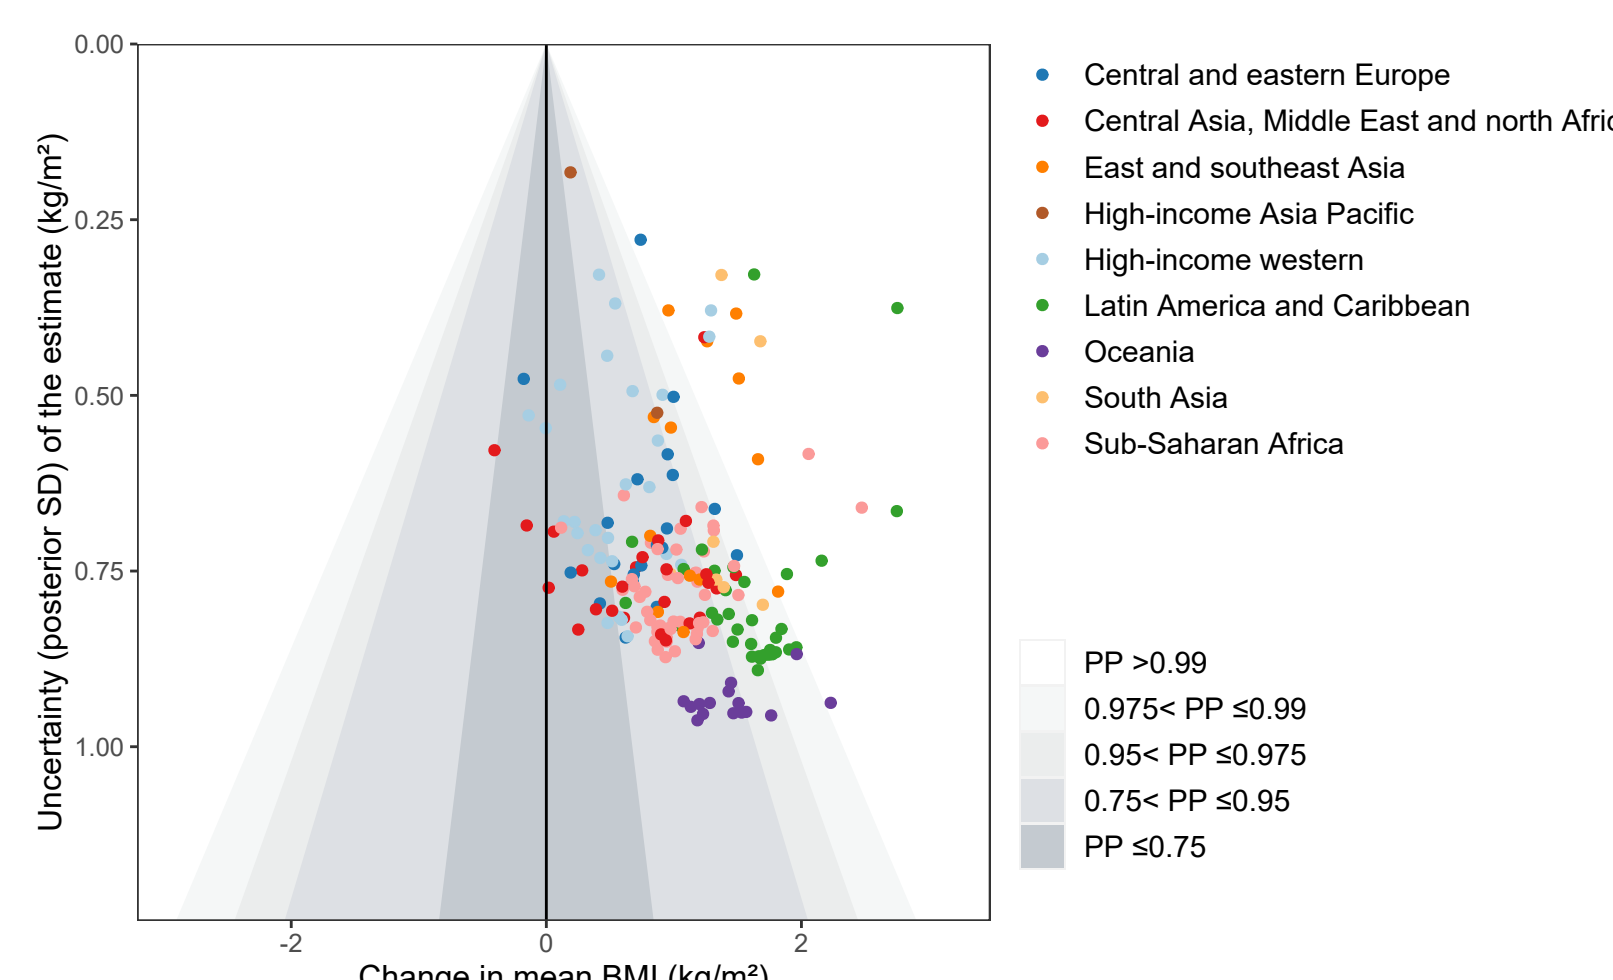



Mean BMI in 2020 (boys, age 5, urban)

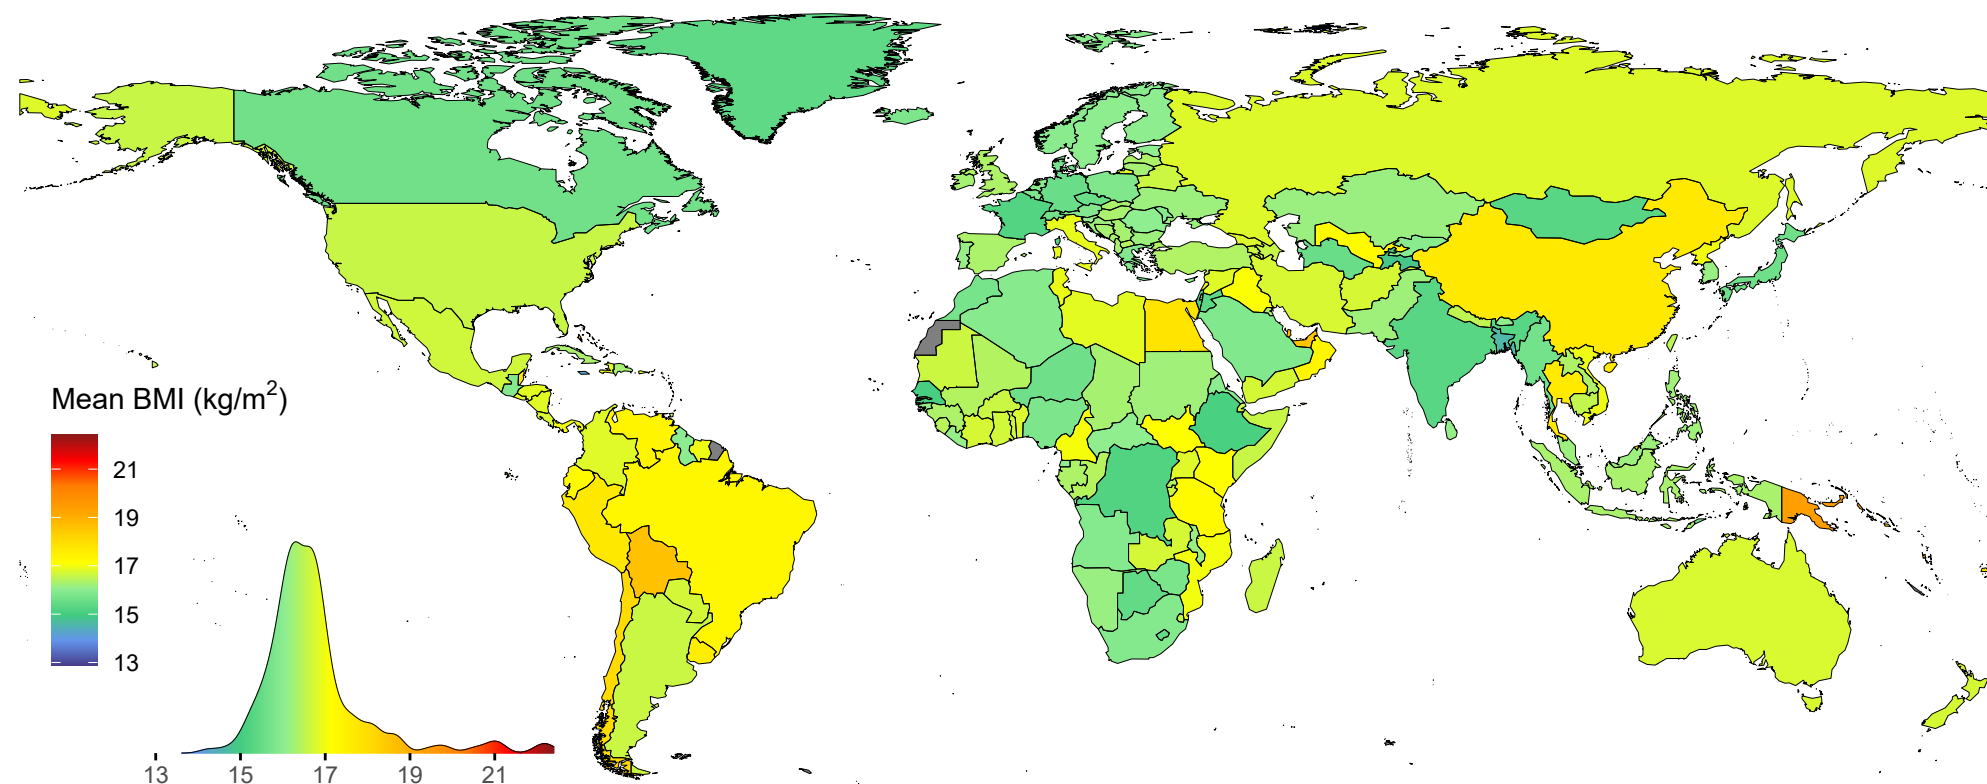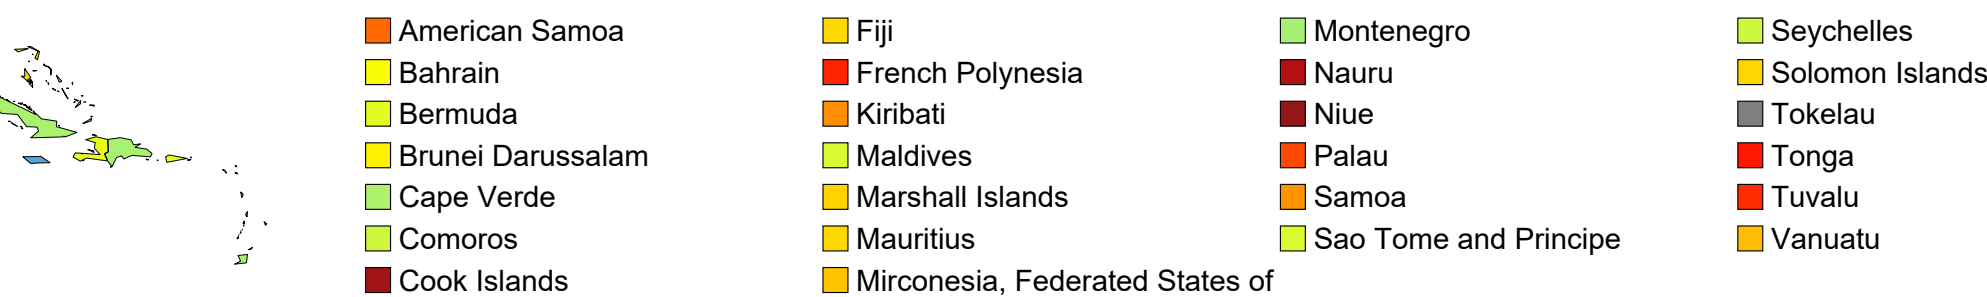

Change 1990-2020 (boys, age 5, urban)

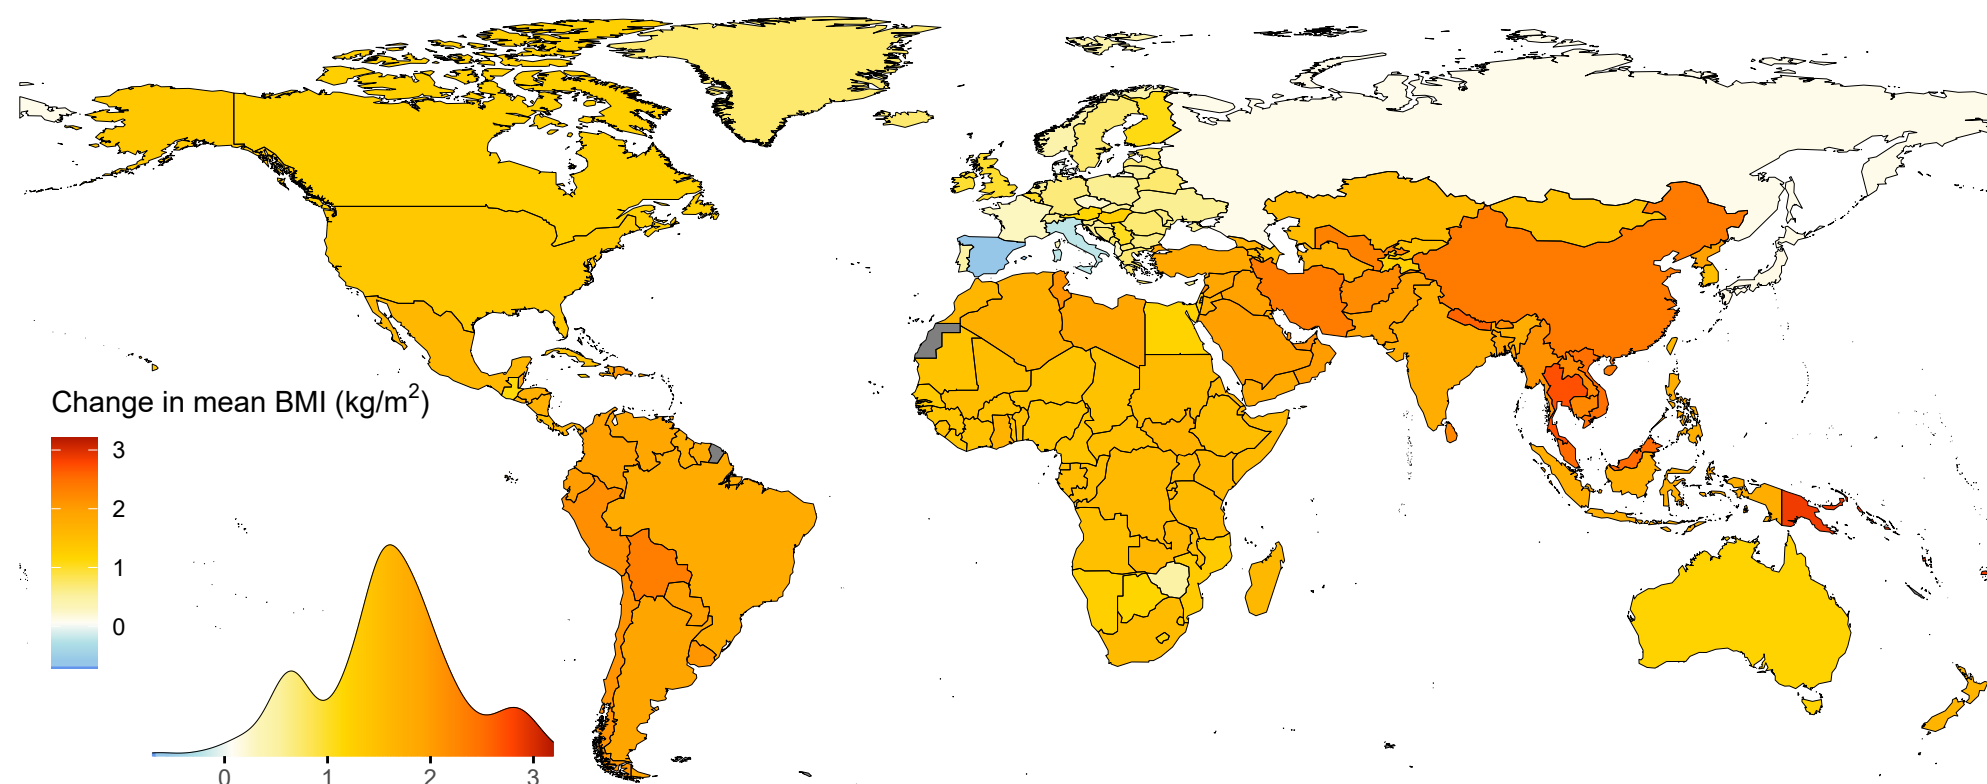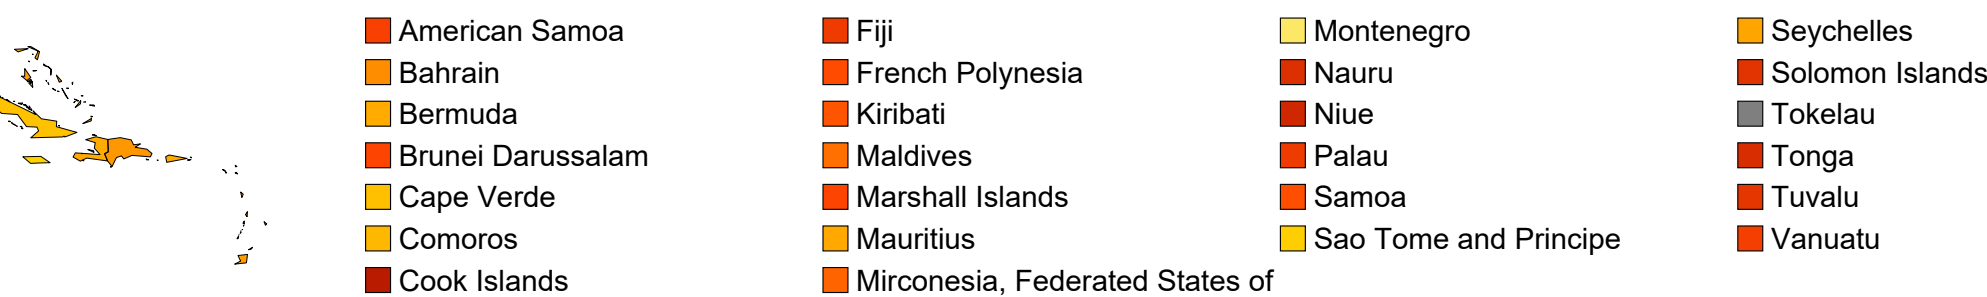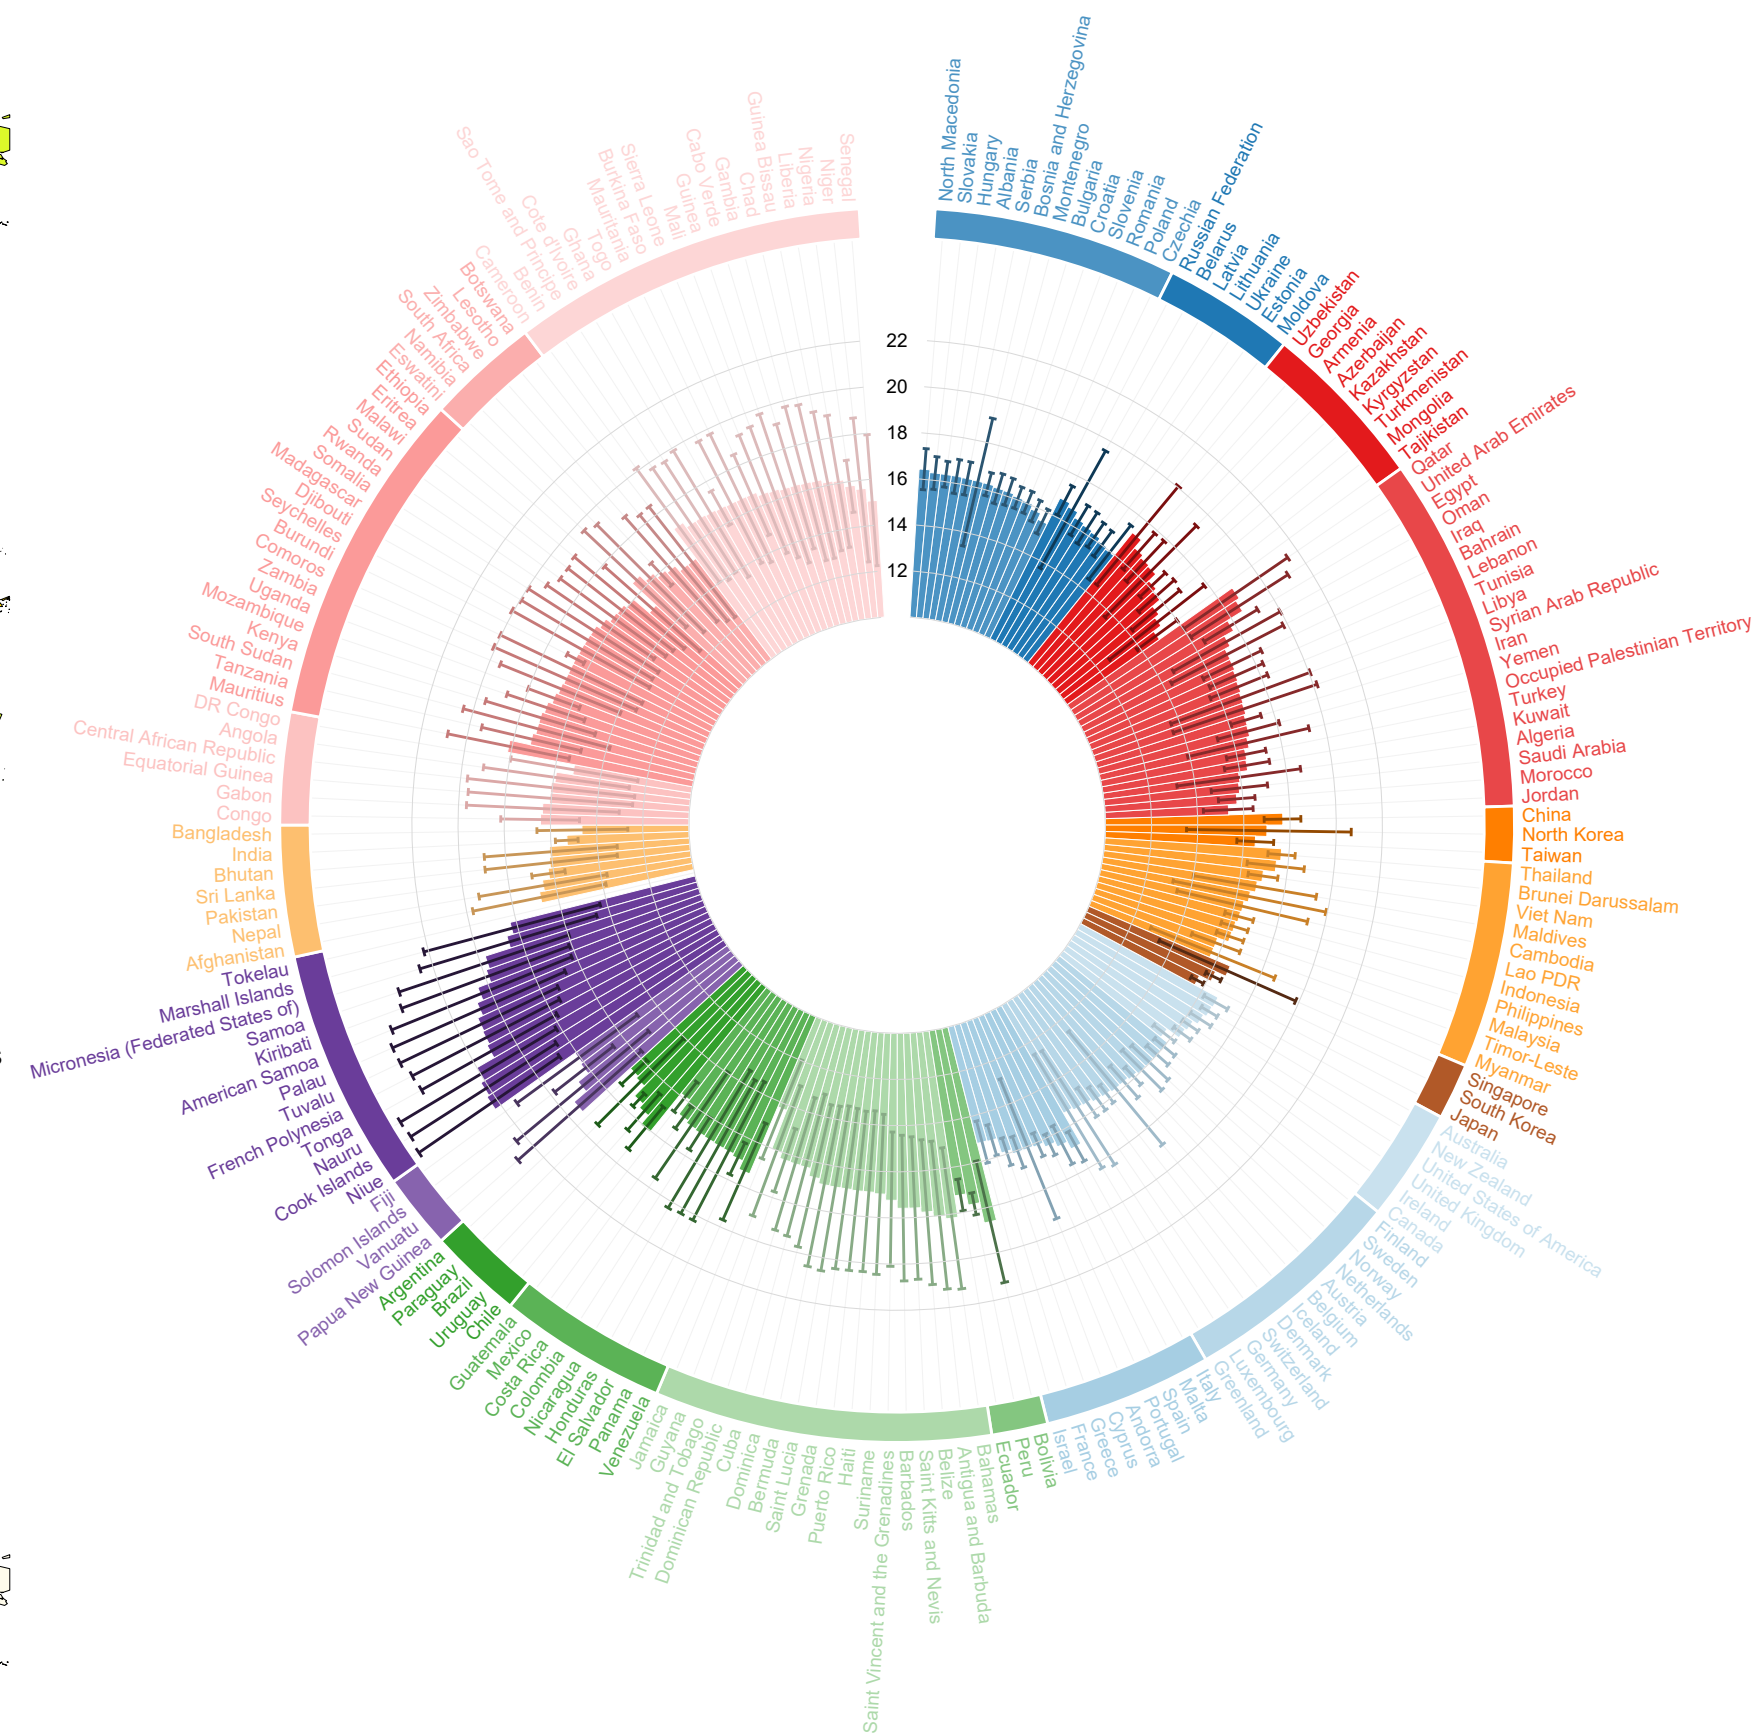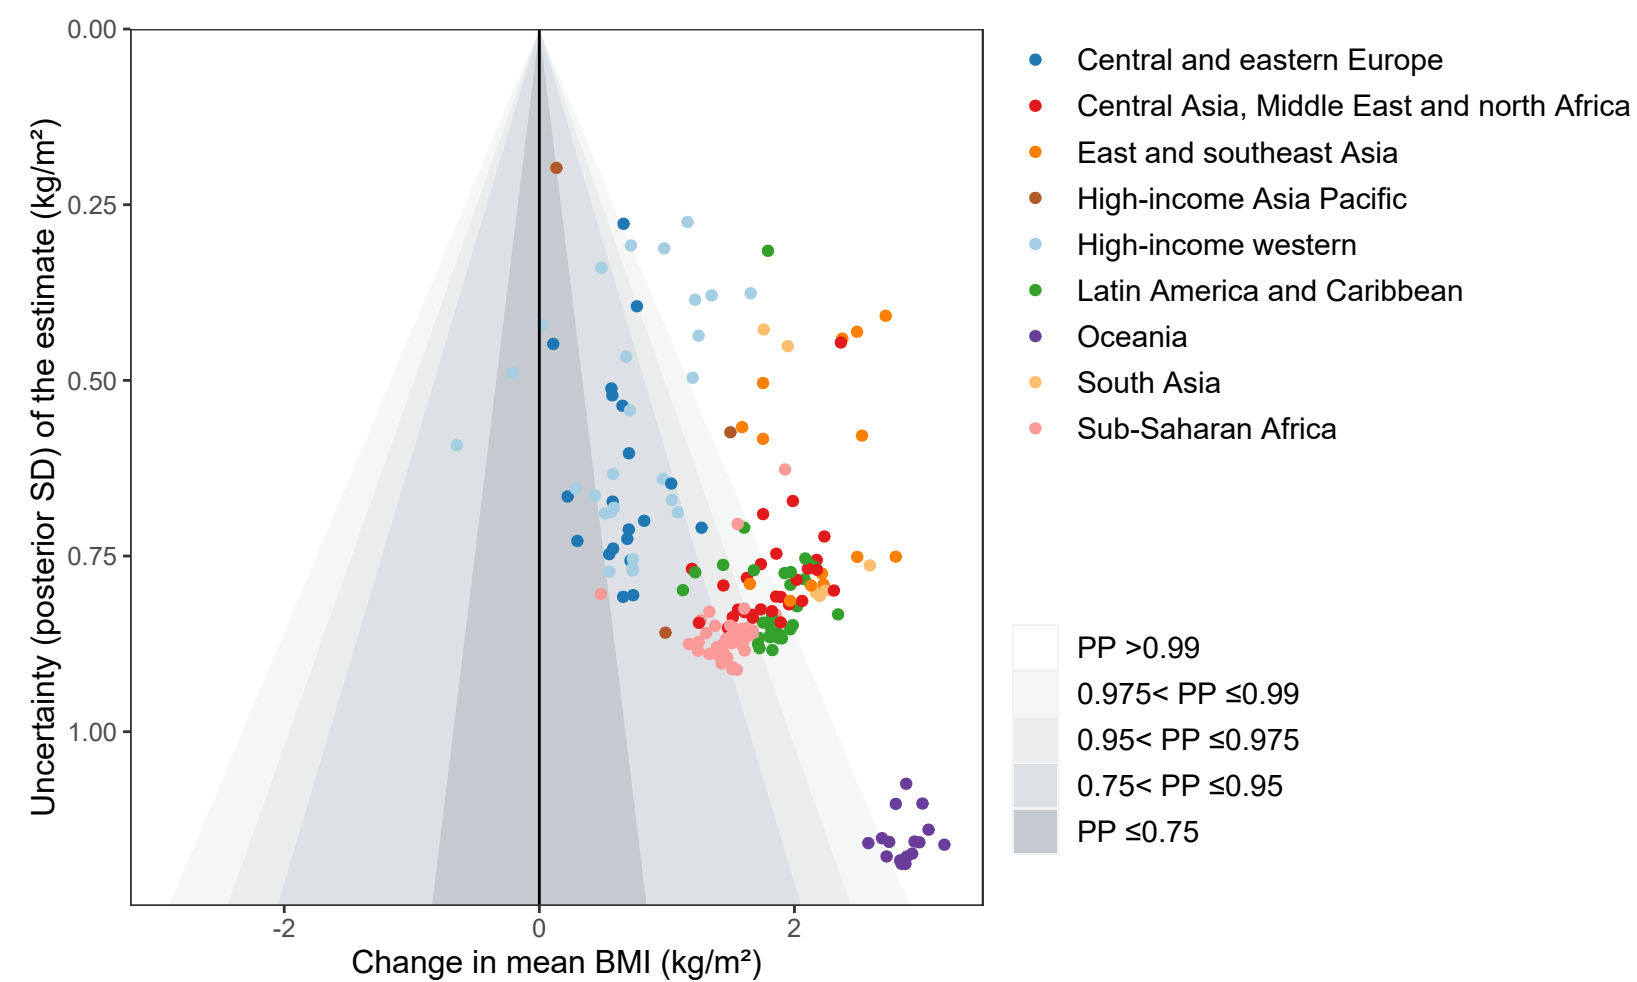



Mean BMI in 2020 (boys, age 5, rural)

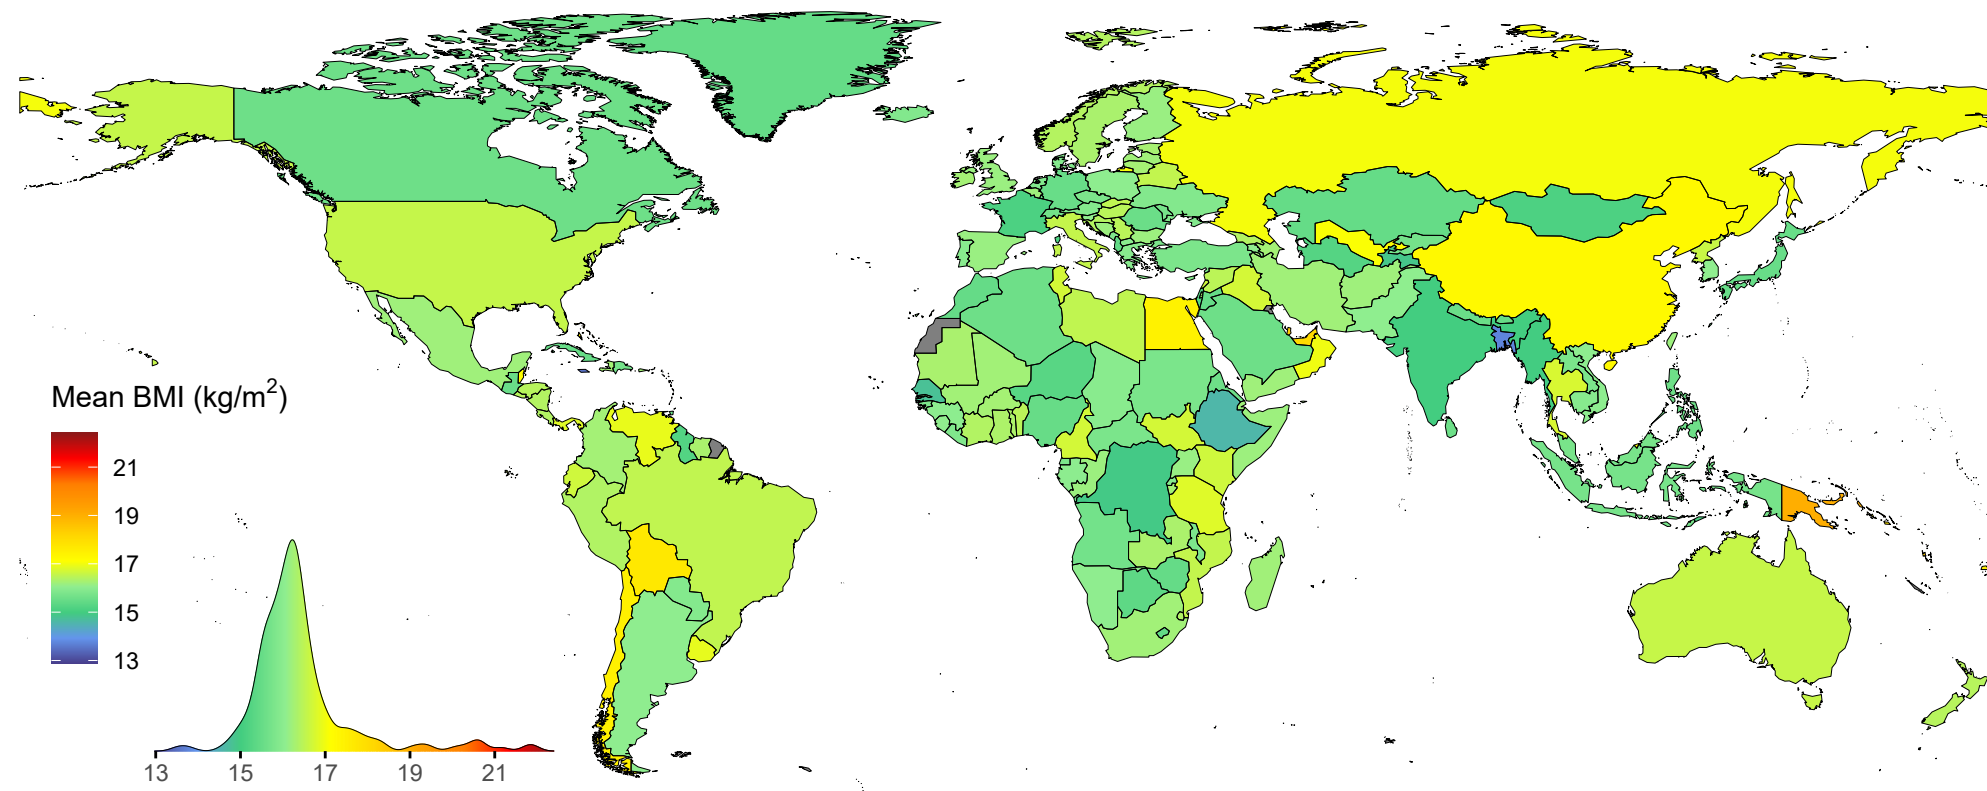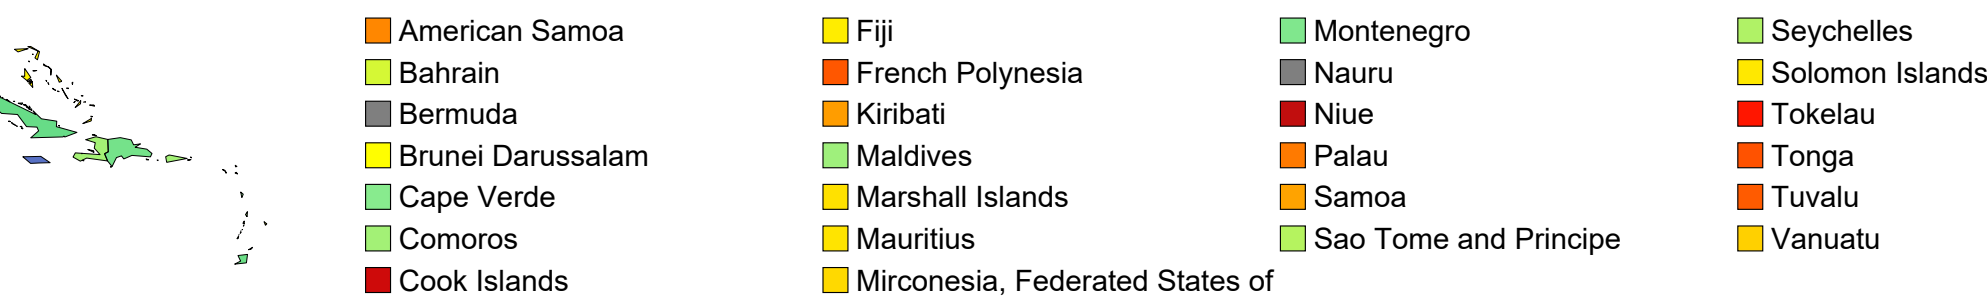

Change 1990-2020 (boys, age 5, rural)

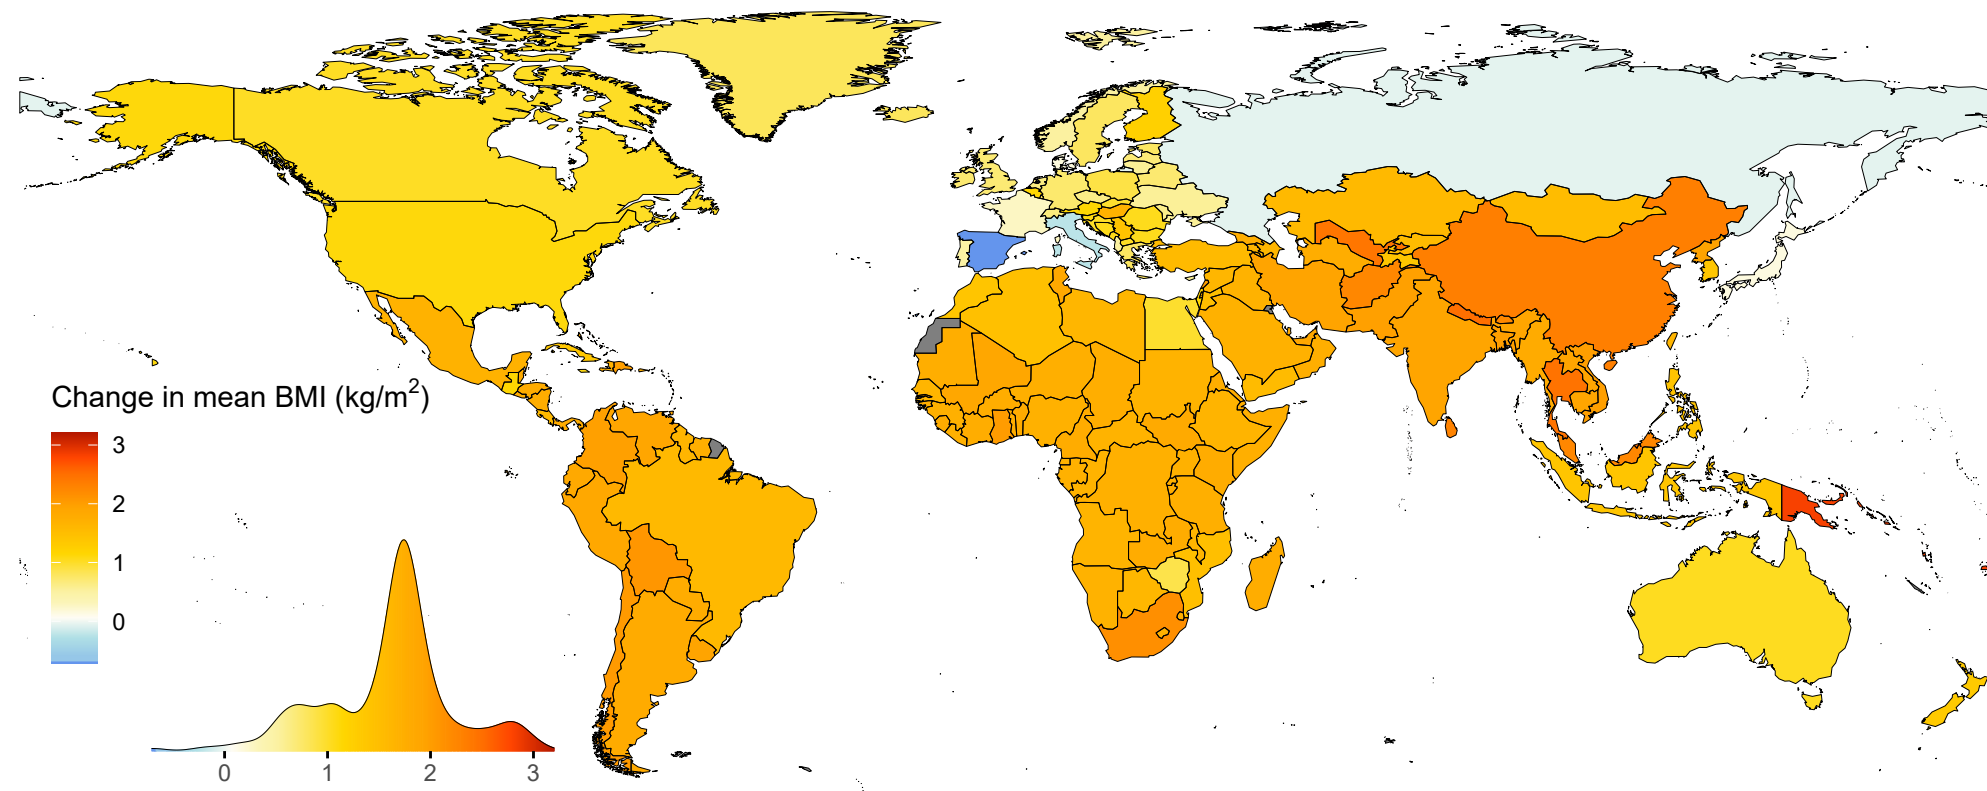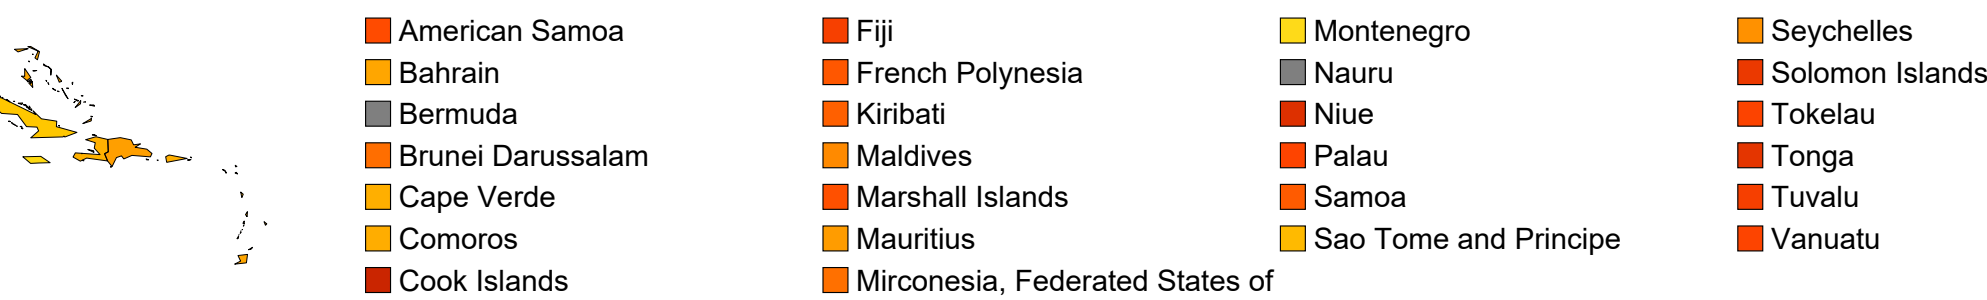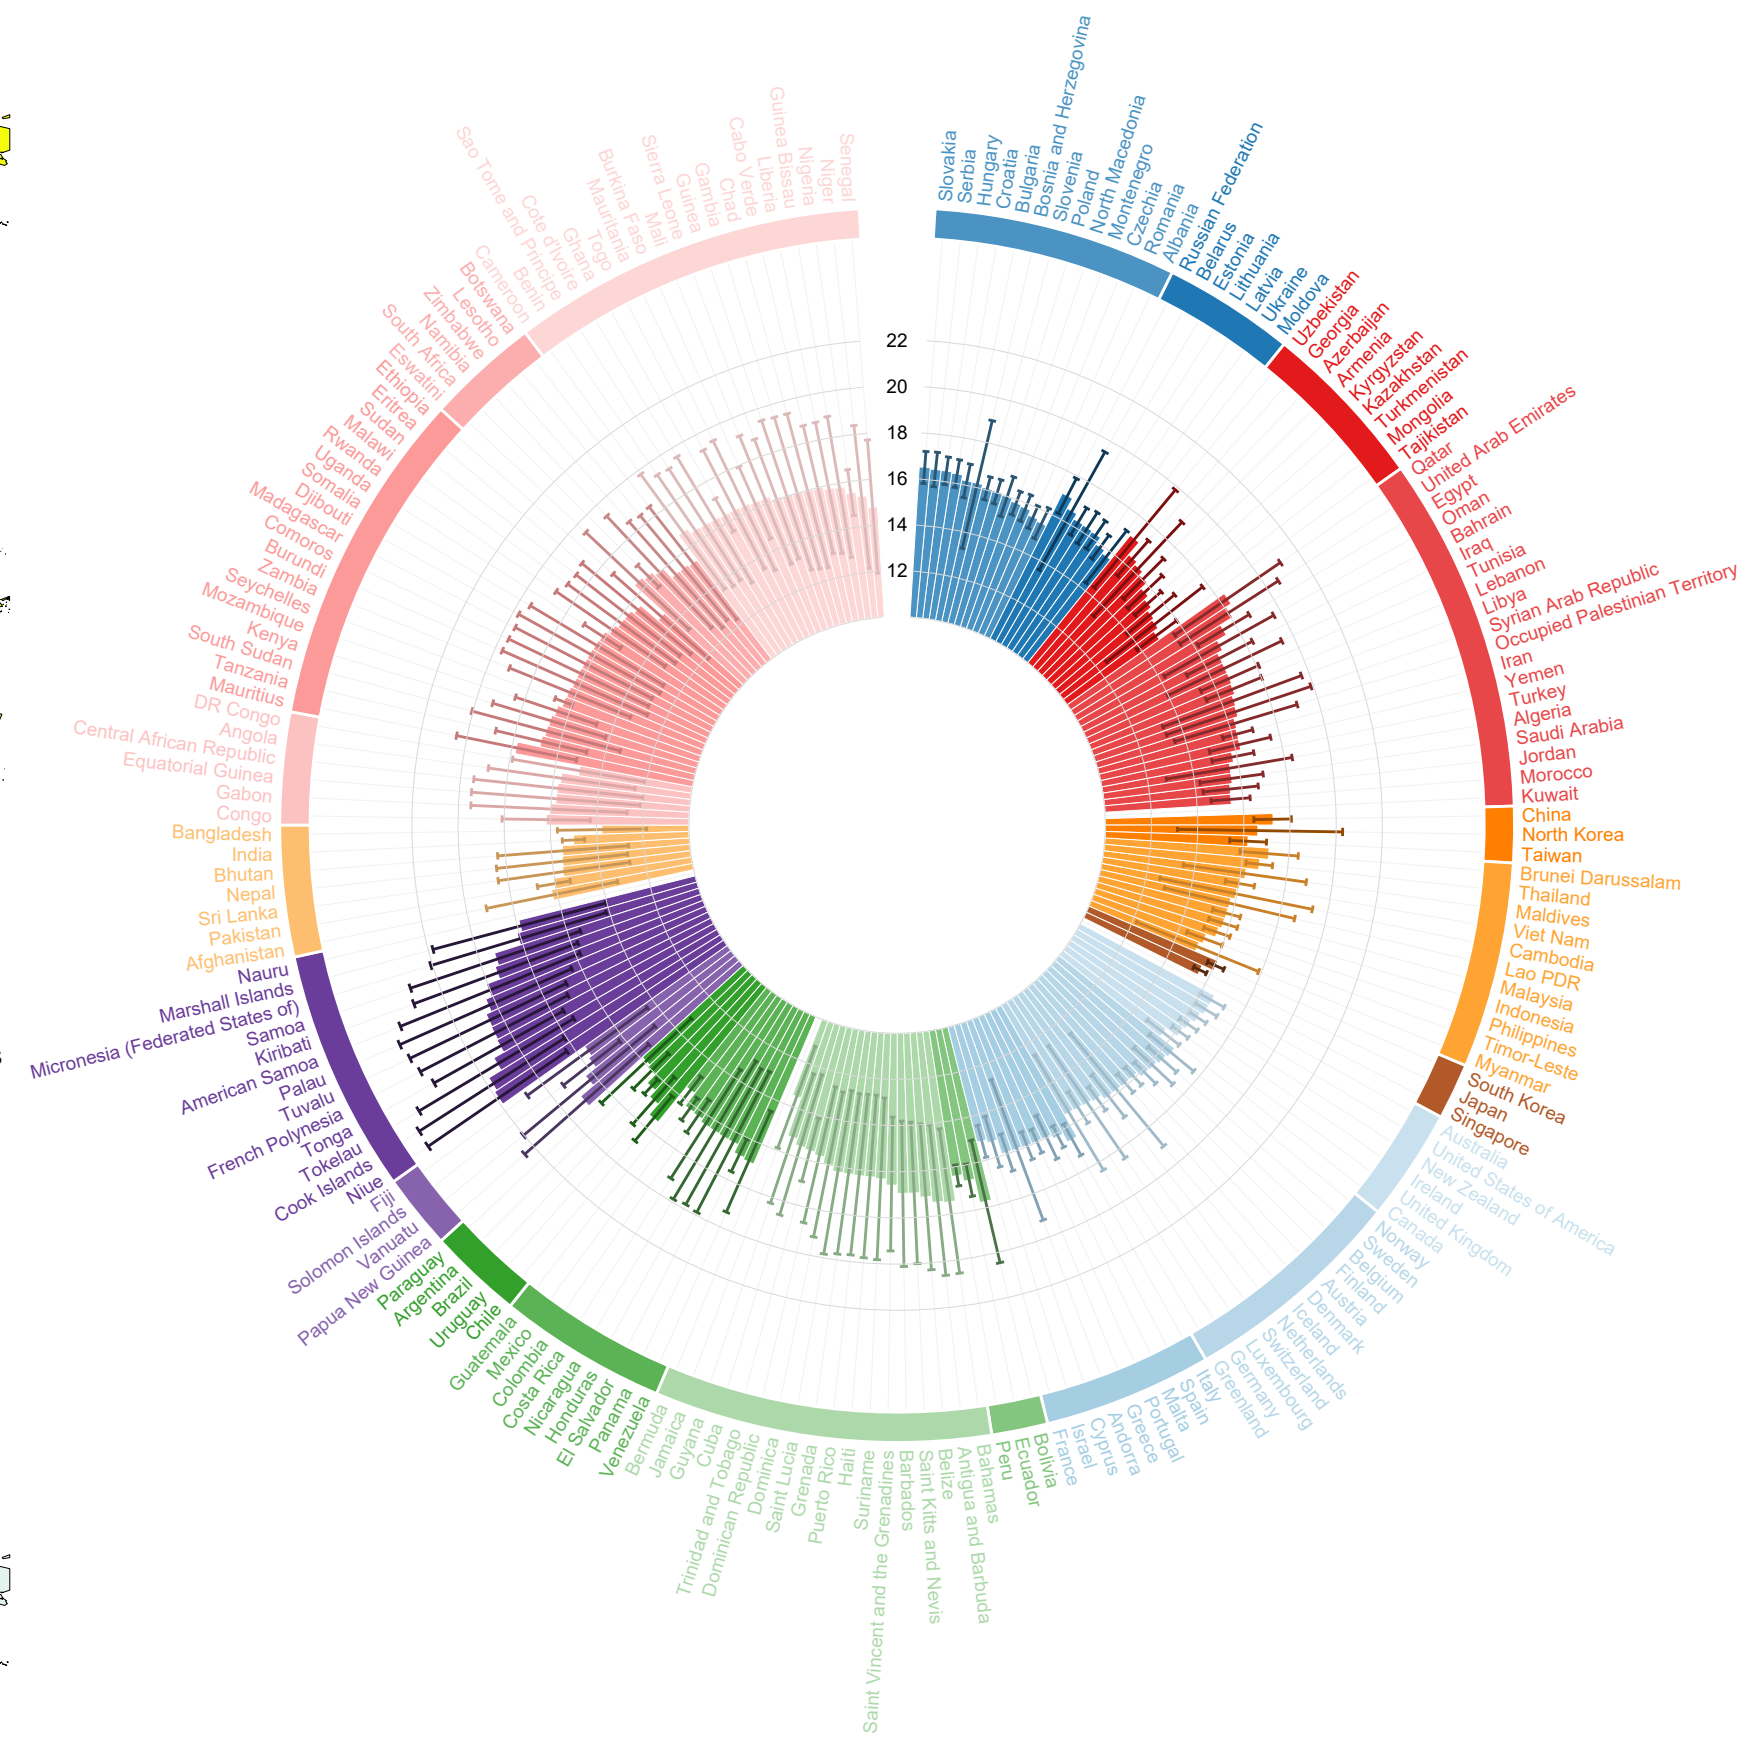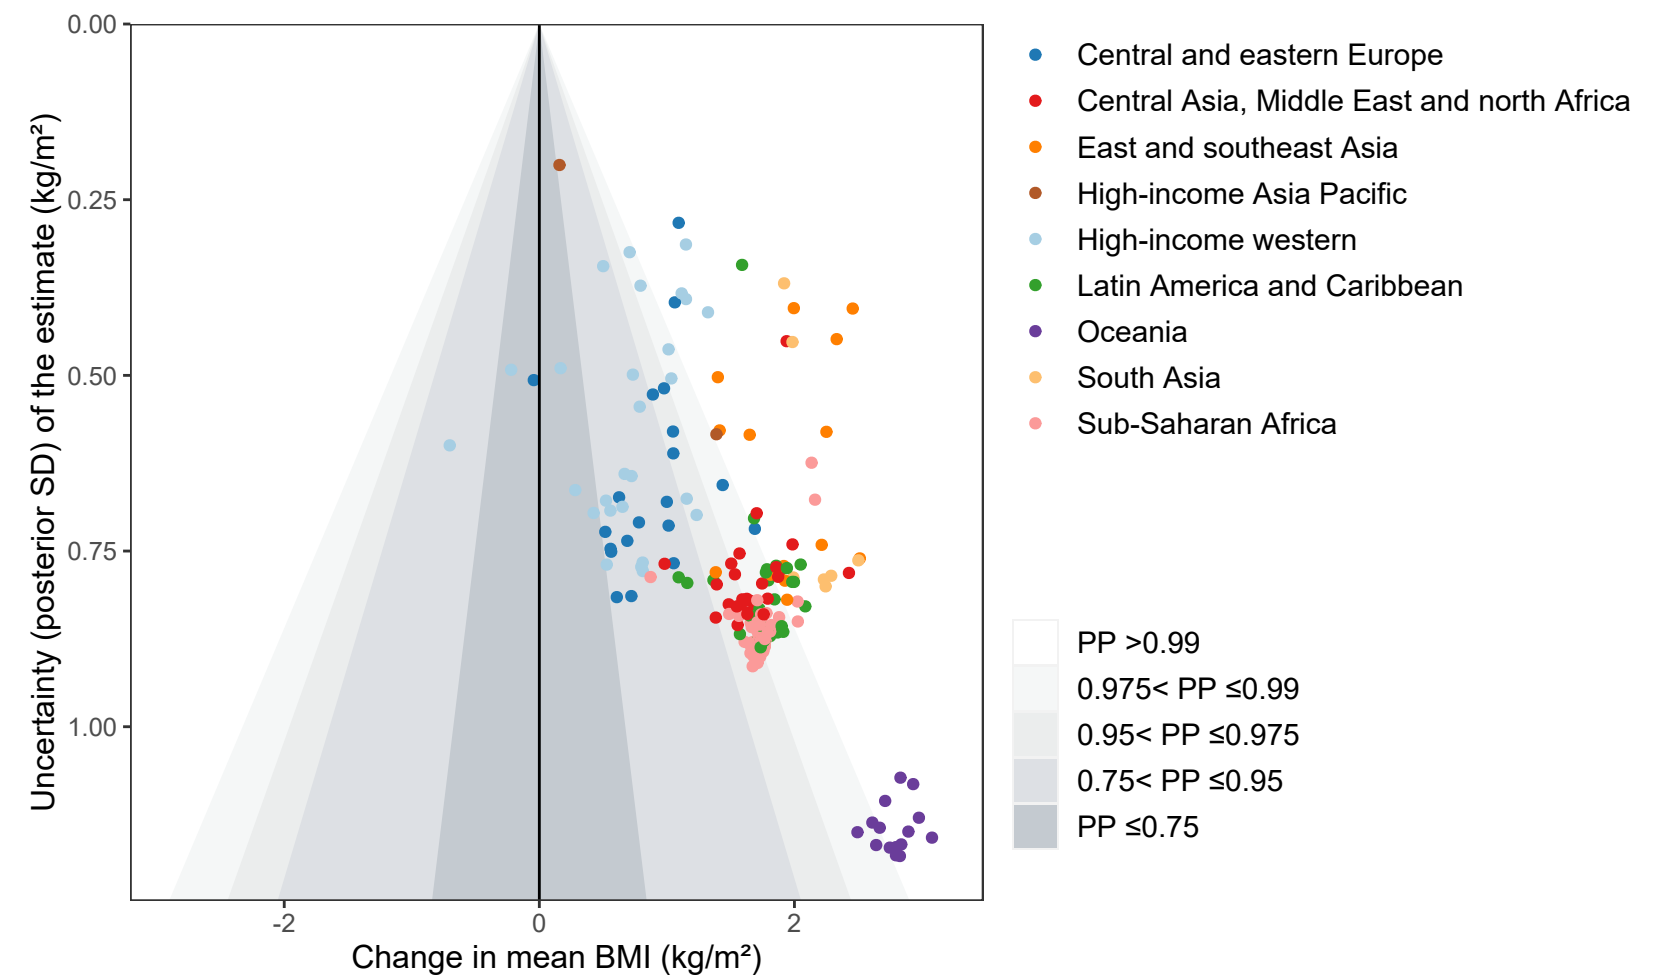



Mean BMI in 2020 (girls, age 10, urban)

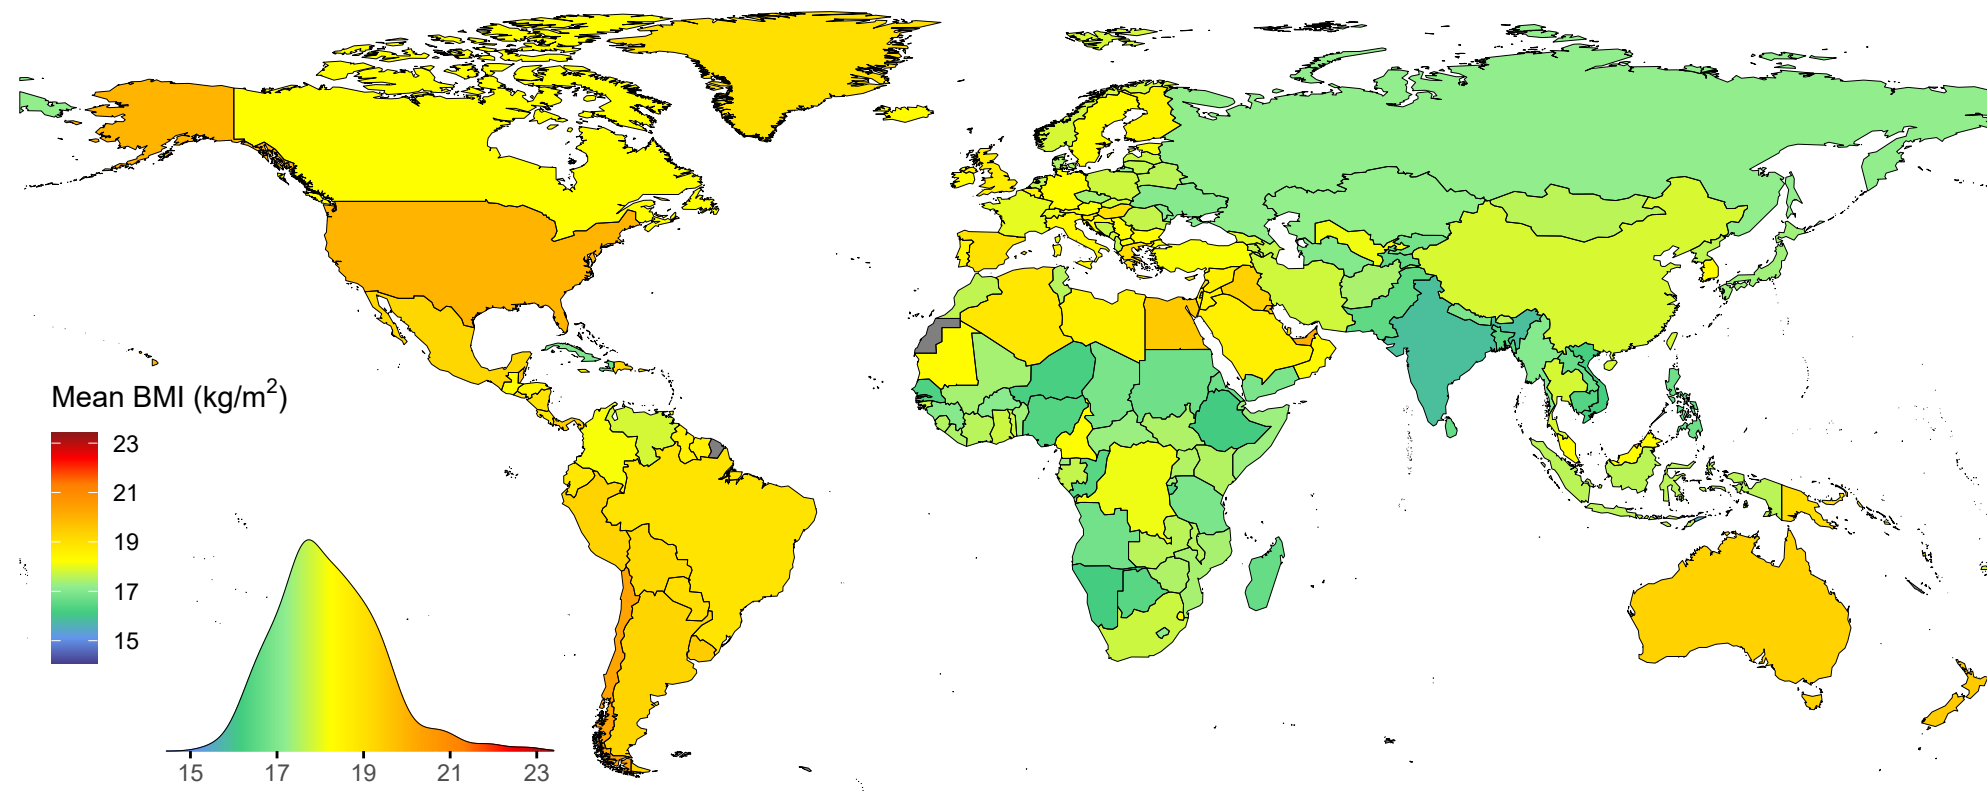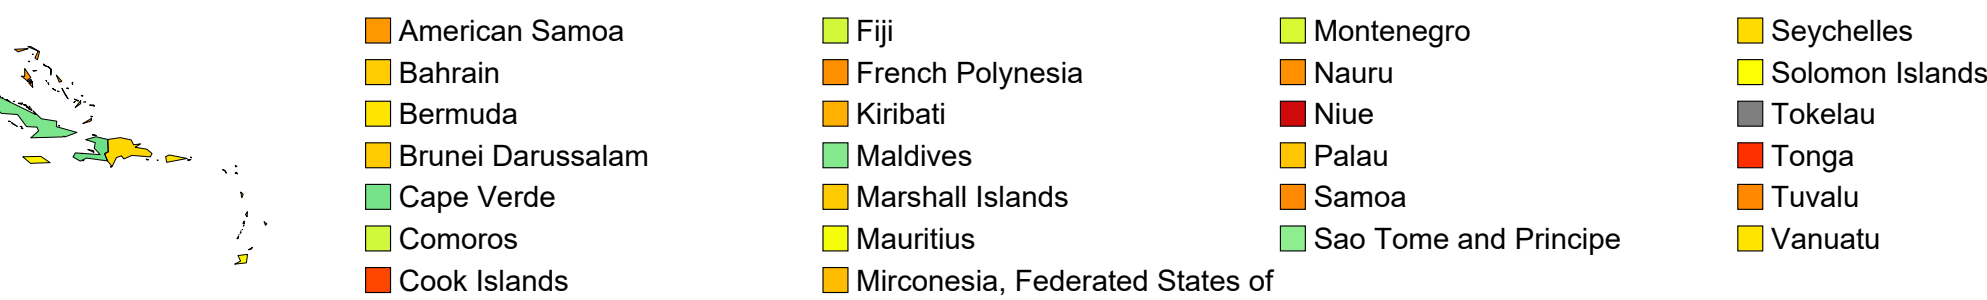

Change 1990-2020 (girls, age 10, urban)

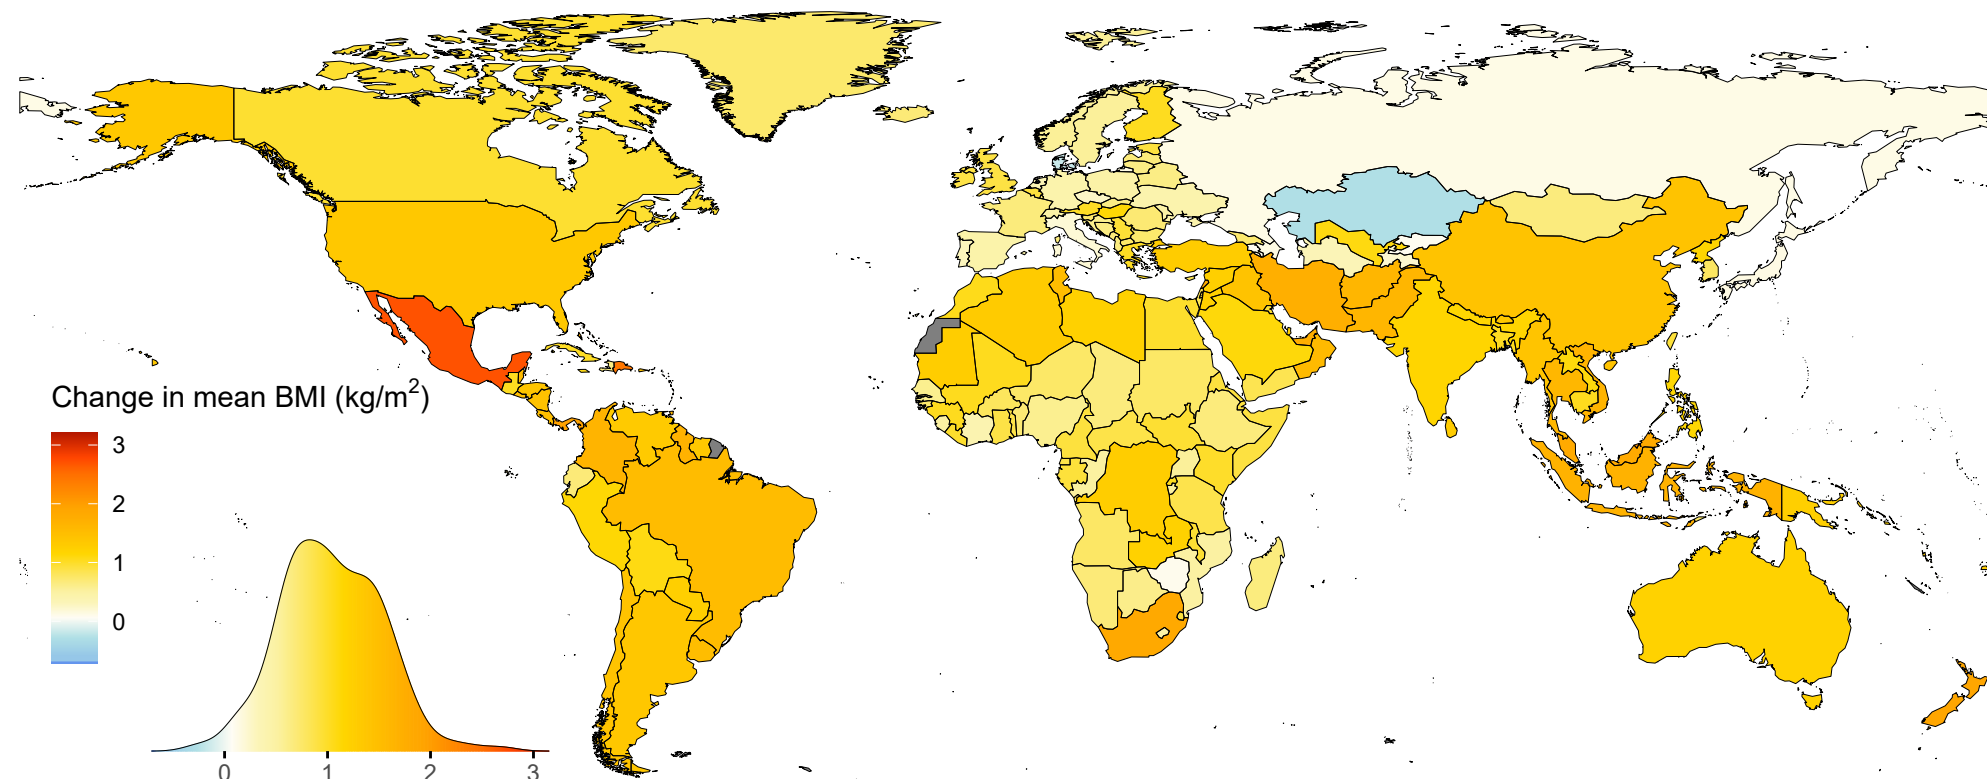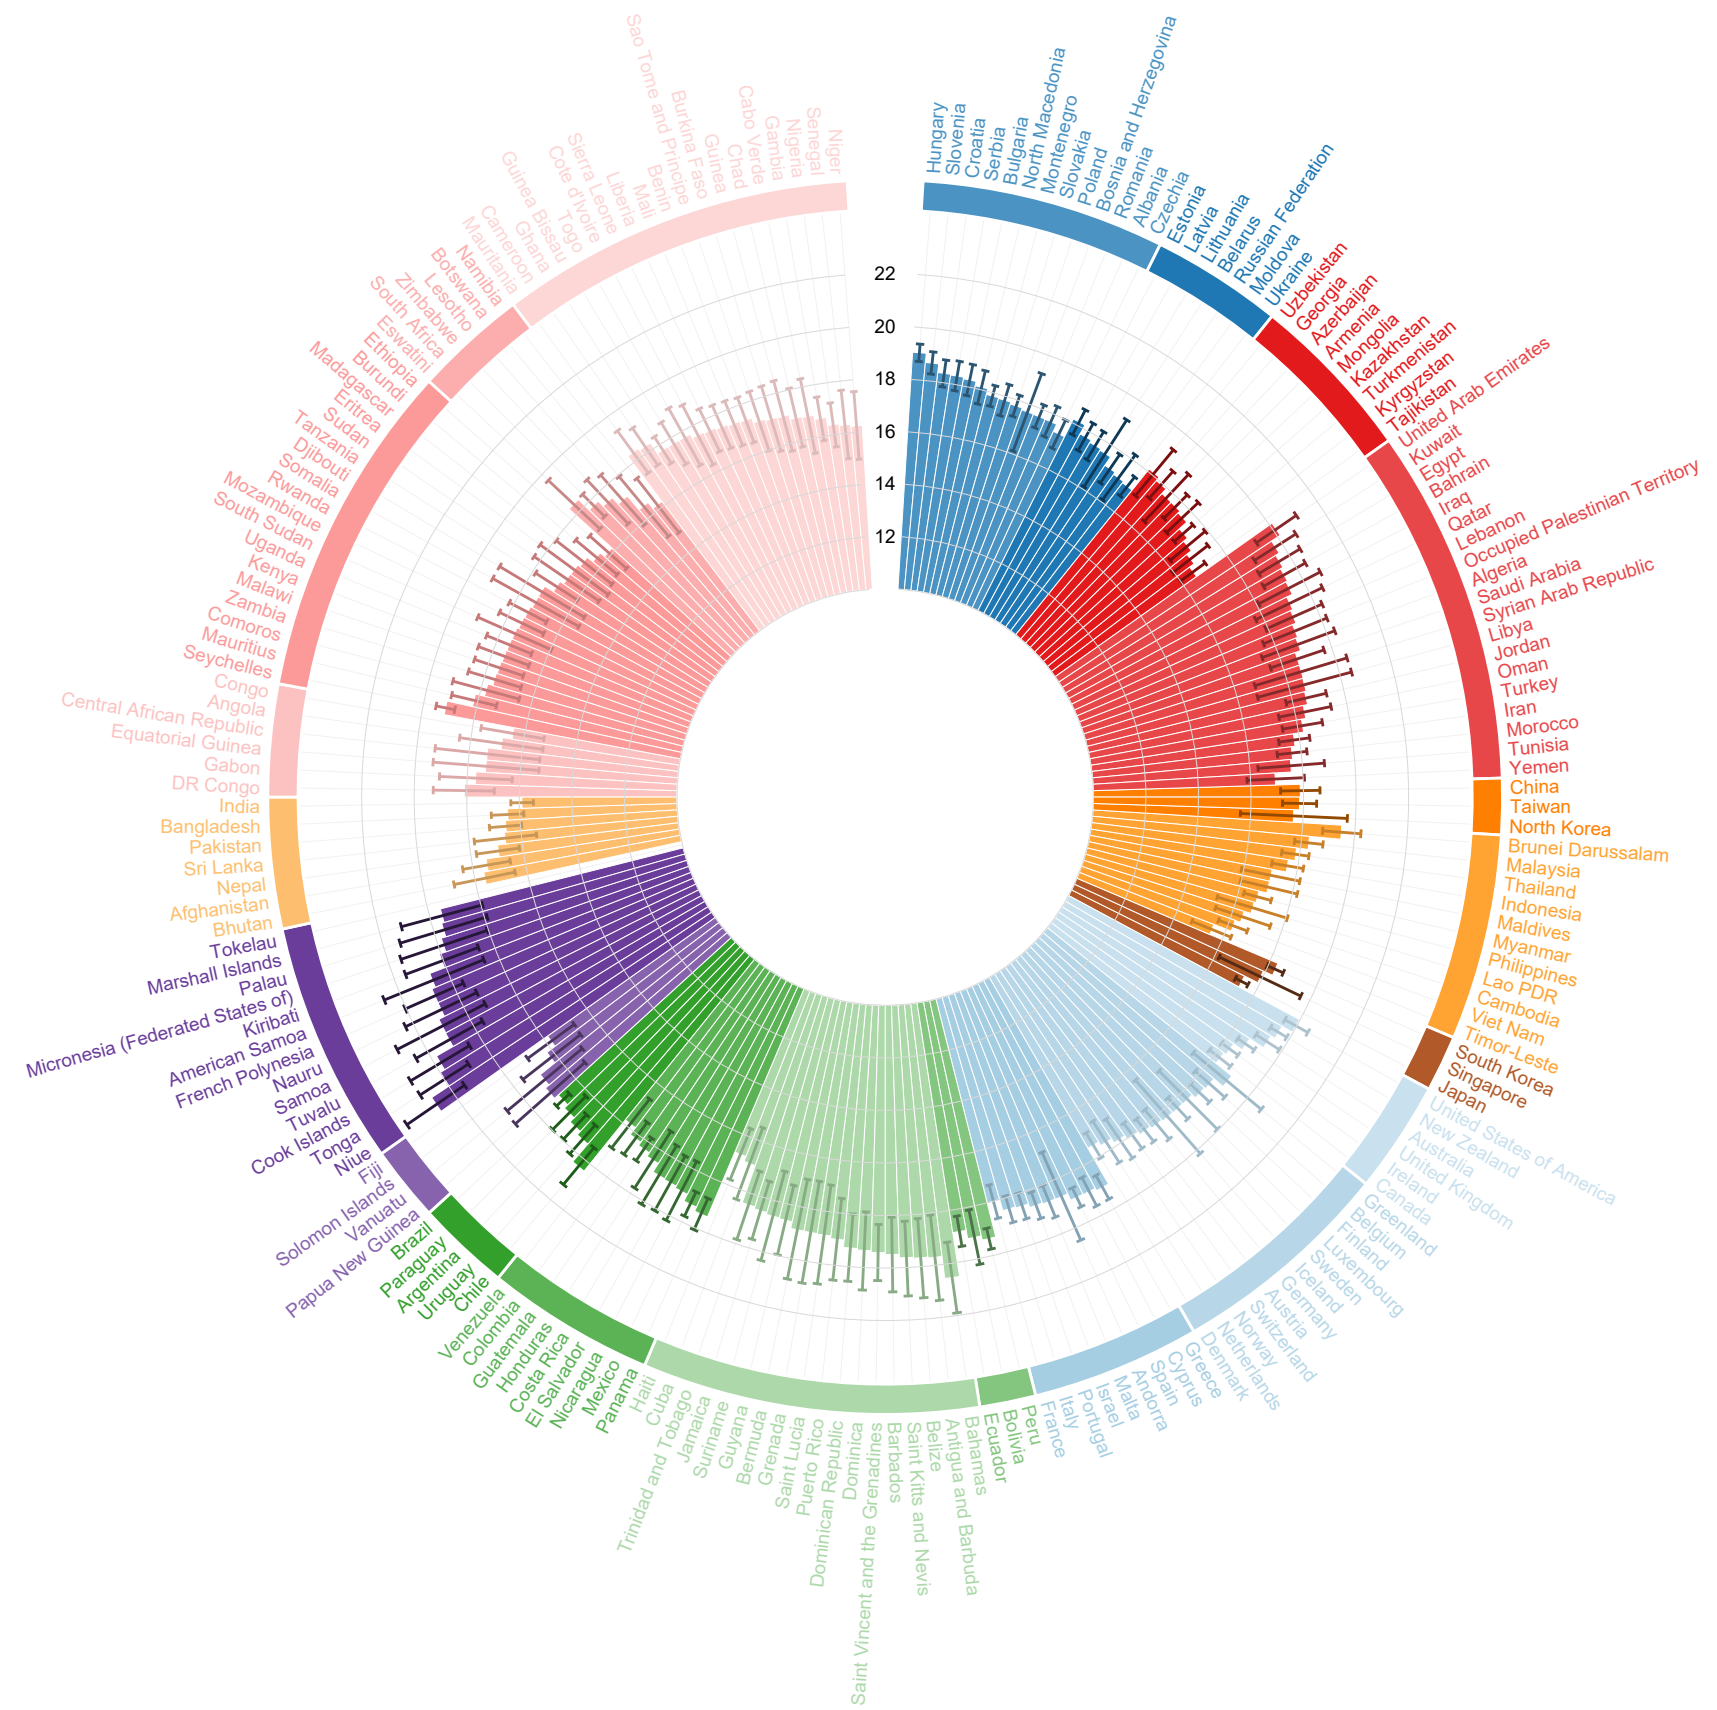



Mean BMI in 2020 (girls, age 10, rural)

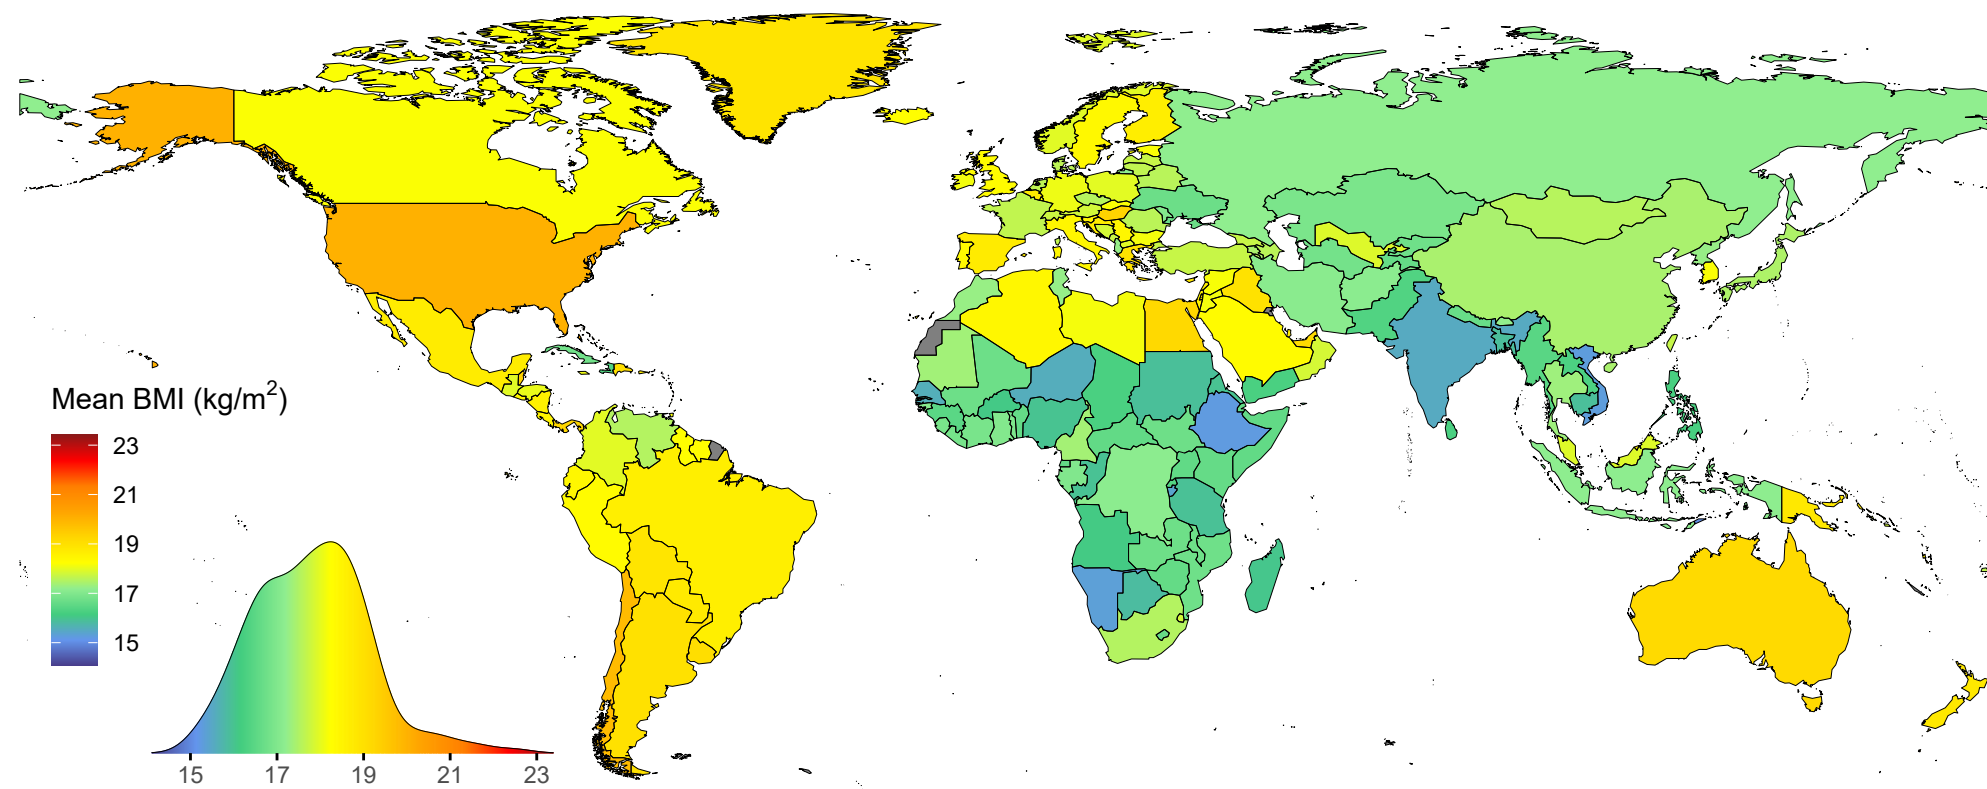

- |                   |                                 |                       |                 |
|-------------------|---------------------------------|-----------------------|-----------------|
| American Samoa    | Fiji                            | Montenegro            | Seychelles      |
| Bahrain           | French Polynesia                | Nauru                 | Solomon Islands |
| Bermuda           | Kiribati                        | Niue                  | Tokelau         |
| Brunei Darussalam | Maldives                        | Palau                 | Tonga           |
| Cape Verde        | Marshall Islands                | Samoa                 | Tuvalu          |
| Comoros           | Mauritius                       | Sao Tome and Principe | Vanuatu         |
| Cook Islands      | Mirconesia, Federated States of |                       |                 |

Change 1990-2020 (girls, age 10, rural)

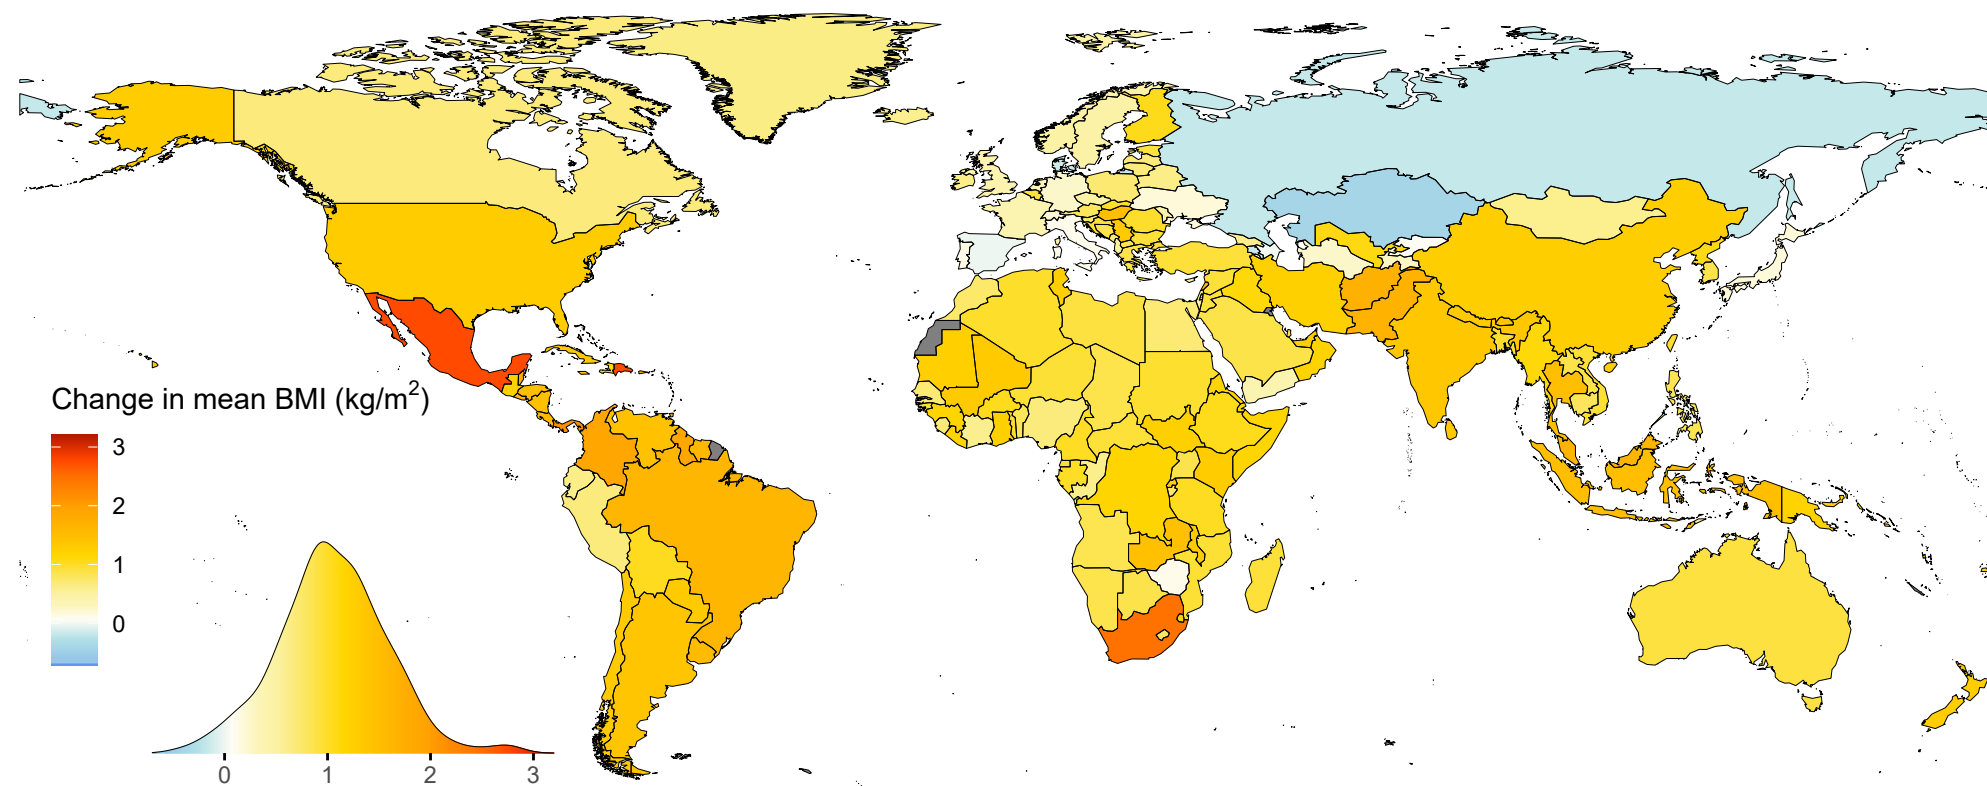

- |                   |                                 |                       |                 |
|-------------------|---------------------------------|-----------------------|-----------------|
| American Samoa    | Fiji                            | Montenegro            | Seychelles      |
| Bahrain           | French Polynesia                | Nauru                 | Solomon Islands |
| Bermuda           | Kiribati                        | Niue                  | Tokelau         |
| Brunei Darussalam | Maldives                        | Palau                 | Tonga           |
| Cape Verde        | Marshall Islands                | Samoa                 | Tuvalu          |
| Comoros           | Mauritius                       | Sao Tome and Principe | Vanuatu         |
| Cook Islands      | Mirconesia, Federated States of |                       |                 |

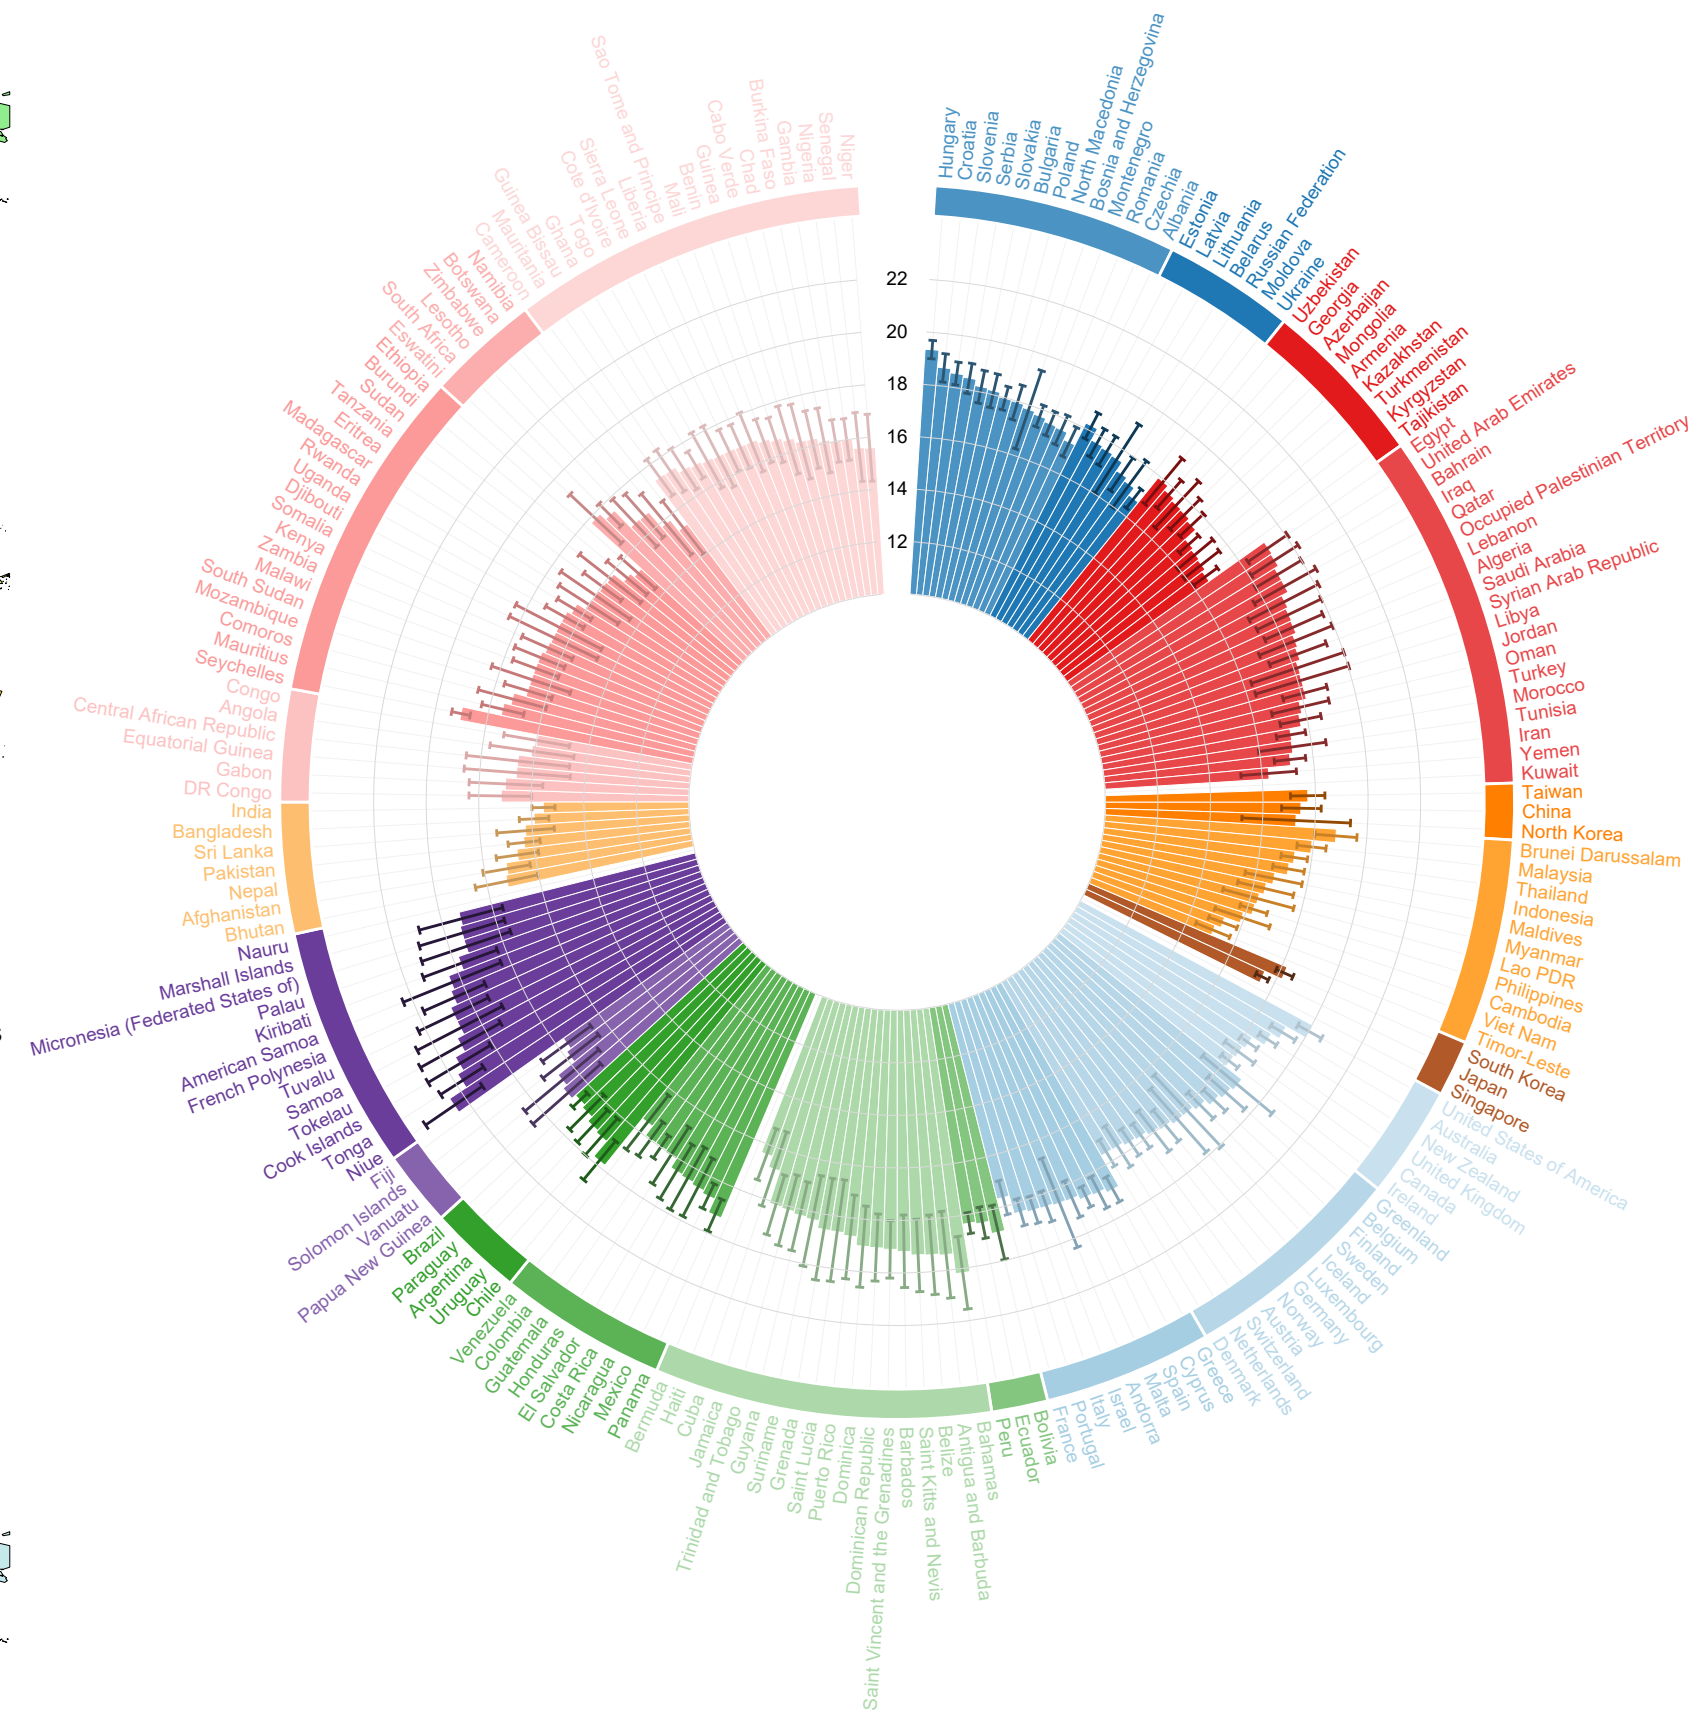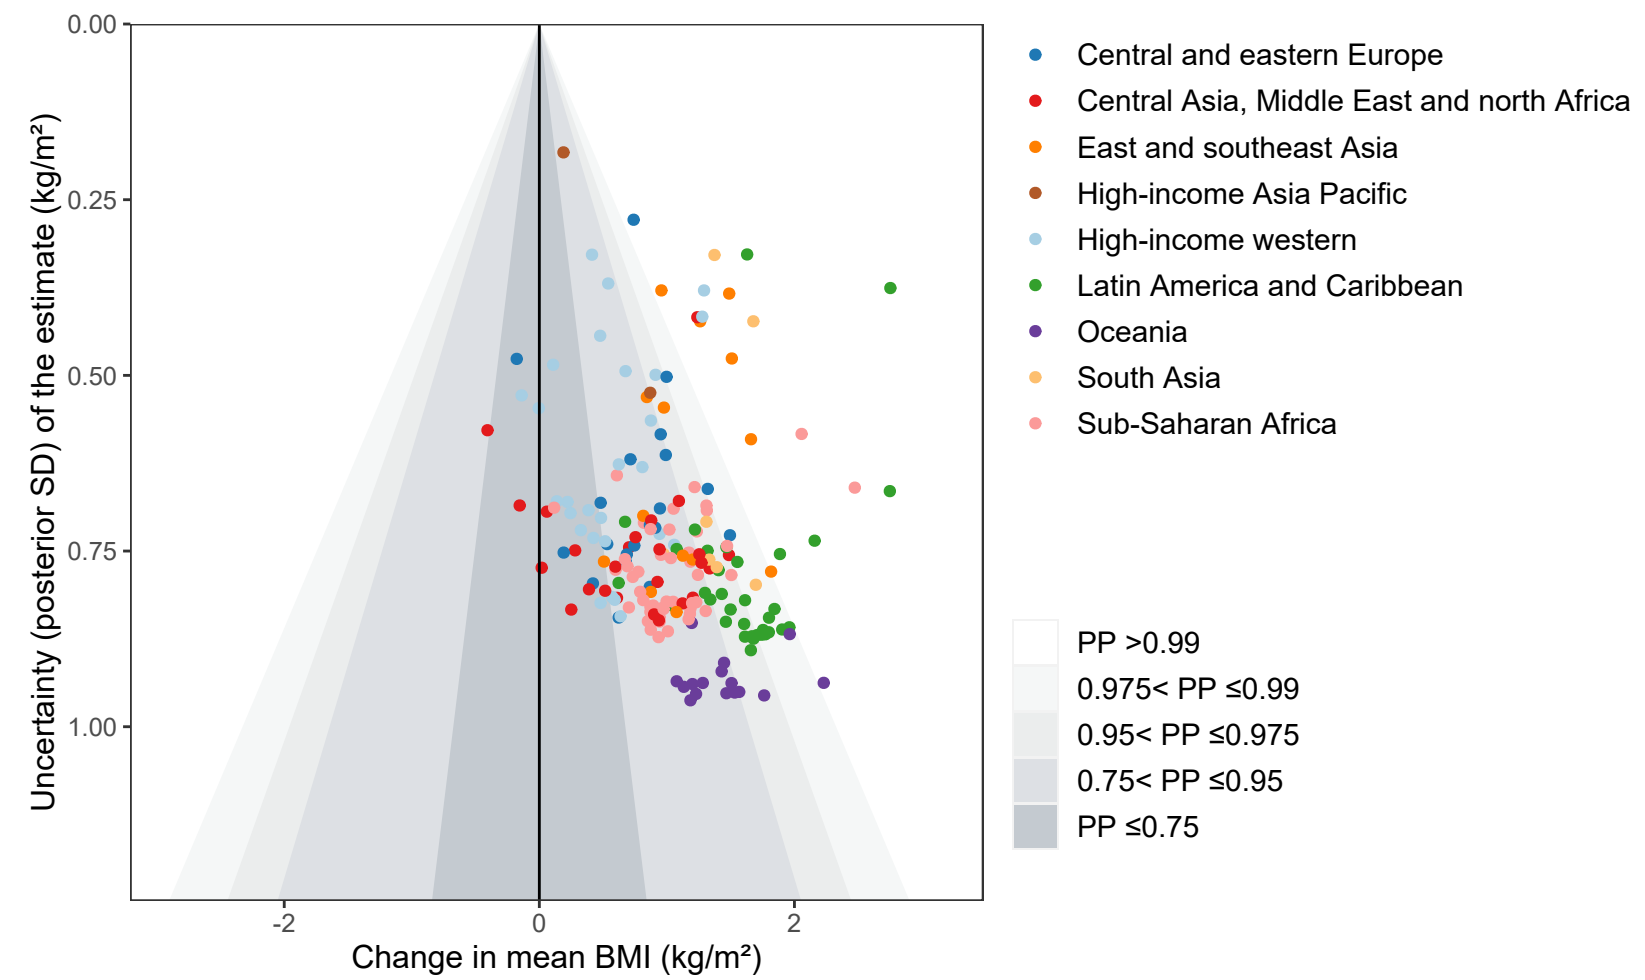



Mean BMI in 2020 (boys, age 10, urban)

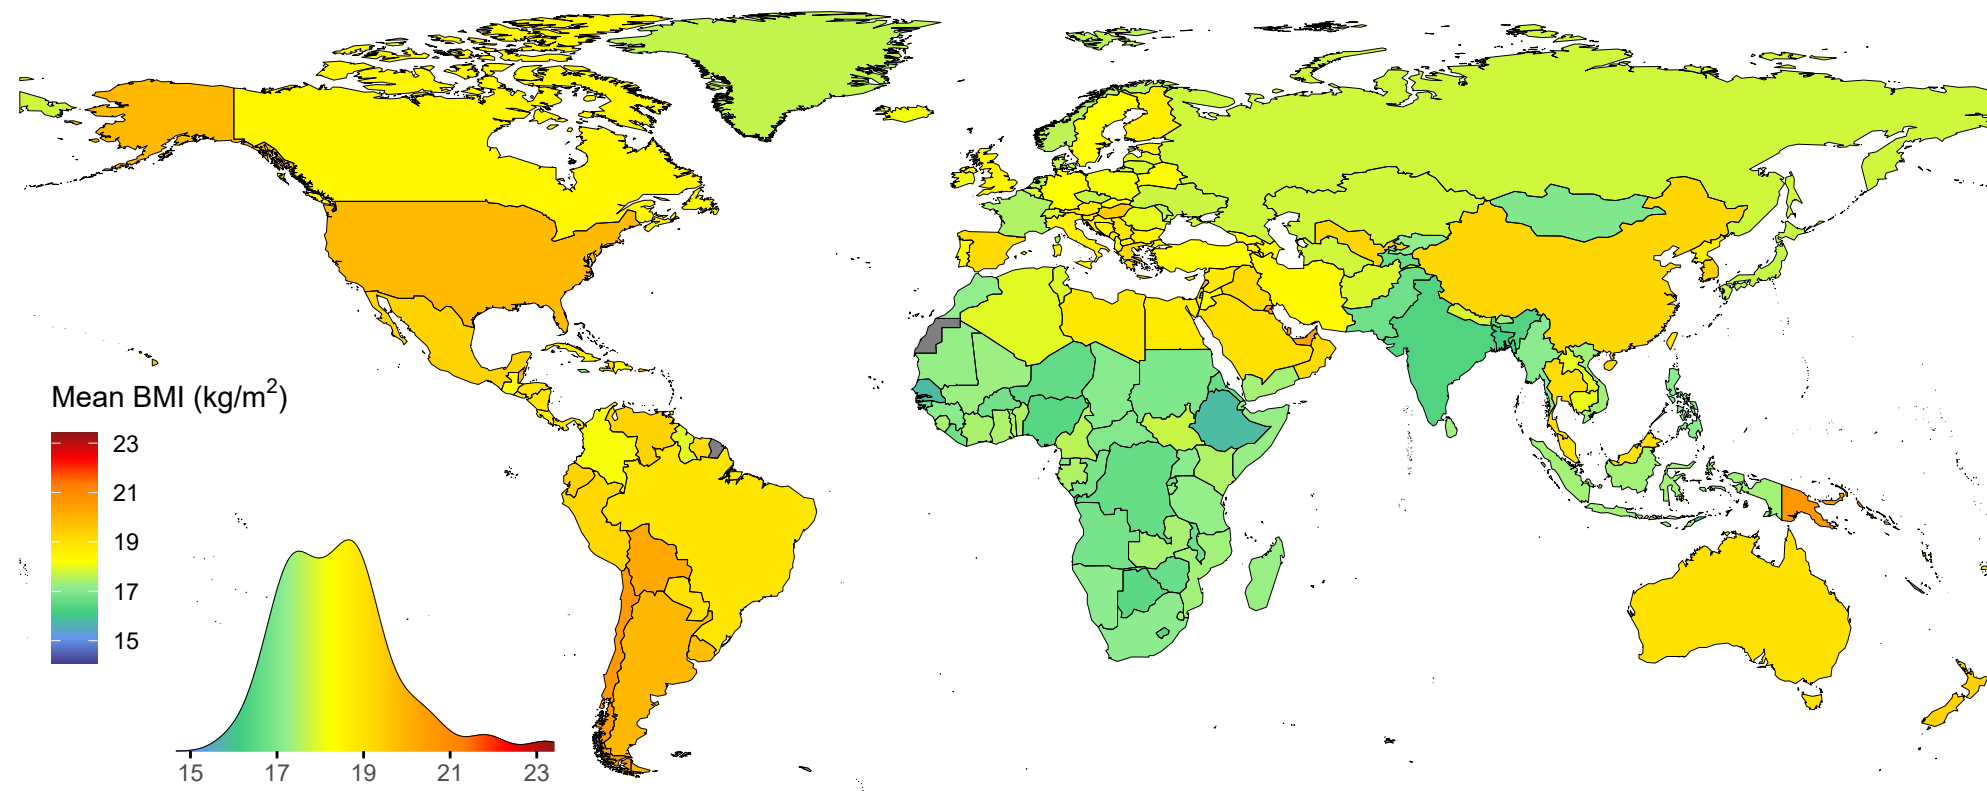

Mean BMI (kg/m<sup>2</sup>)

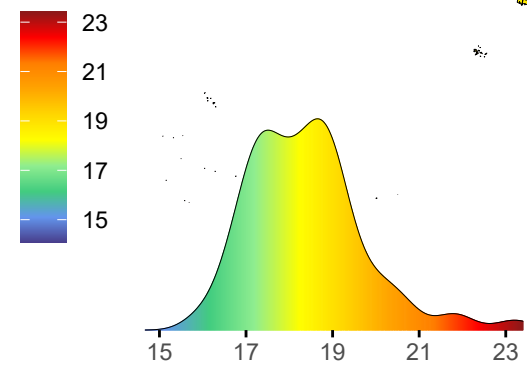

- |                                                          |                                                                        |                                                              |                                                        |
|----------------------------------------------------------|------------------------------------------------------------------------|--------------------------------------------------------------|--------------------------------------------------------|
| <span style="color: #e67e22;">■</span> American Samoa    | <span style="color: #f1c40f;">■</span> Fiji                            | <span style="color: #f1c40f;">■</span> Montenegro            | <span style="color: #f1c40f;">■</span> Seychelles      |
| <span style="color: #e67e22;">■</span> Bahrain           | <span style="color: #e67e22;">■</span> French Polynesia                | <span style="color: #8e44ad;">■</span> Nauru                 | <span style="color: #f1c40f;">■</span> Solomon Islands |
| <span style="color: #e67e22;">■</span> Bermuda           | <span style="color: #e67e22;">■</span> Kiribati                        | <span style="color: #8e44ad;">■</span> Niue                  | <span style="color: #8e44ad;">■</span> Tokelau         |
| <span style="color: #e67e22;">■</span> Brunei Darussalam | <span style="color: #e67e22;">■</span> Maldives                        | <span style="color: #e67e22;">■</span> Palau                 | <span style="color: #e67e22;">■</span> Tonga           |
| <span style="color: #e67e22;">■</span> Cape Verde        | <span style="color: #e67e22;">■</span> Marshall Islands                | <span style="color: #e67e22;">■</span> Samoa                 | <span style="color: #e67e22;">■</span> Tuvalu          |
| <span style="color: #e67e22;">■</span> Comoros           | <span style="color: #e67e22;">■</span> Mauritius                       | <span style="color: #e67e22;">■</span> Sao Tome and Principe | <span style="color: #e67e22;">■</span> Vanuatu         |
| <span style="color: #e67e22;">■</span> Cook Islands      | <span style="color: #e67e22;">■</span> Mirconesia, Federated States of |                                                              |                                                        |

Change 1990-2020 (boys, age 10, urban)

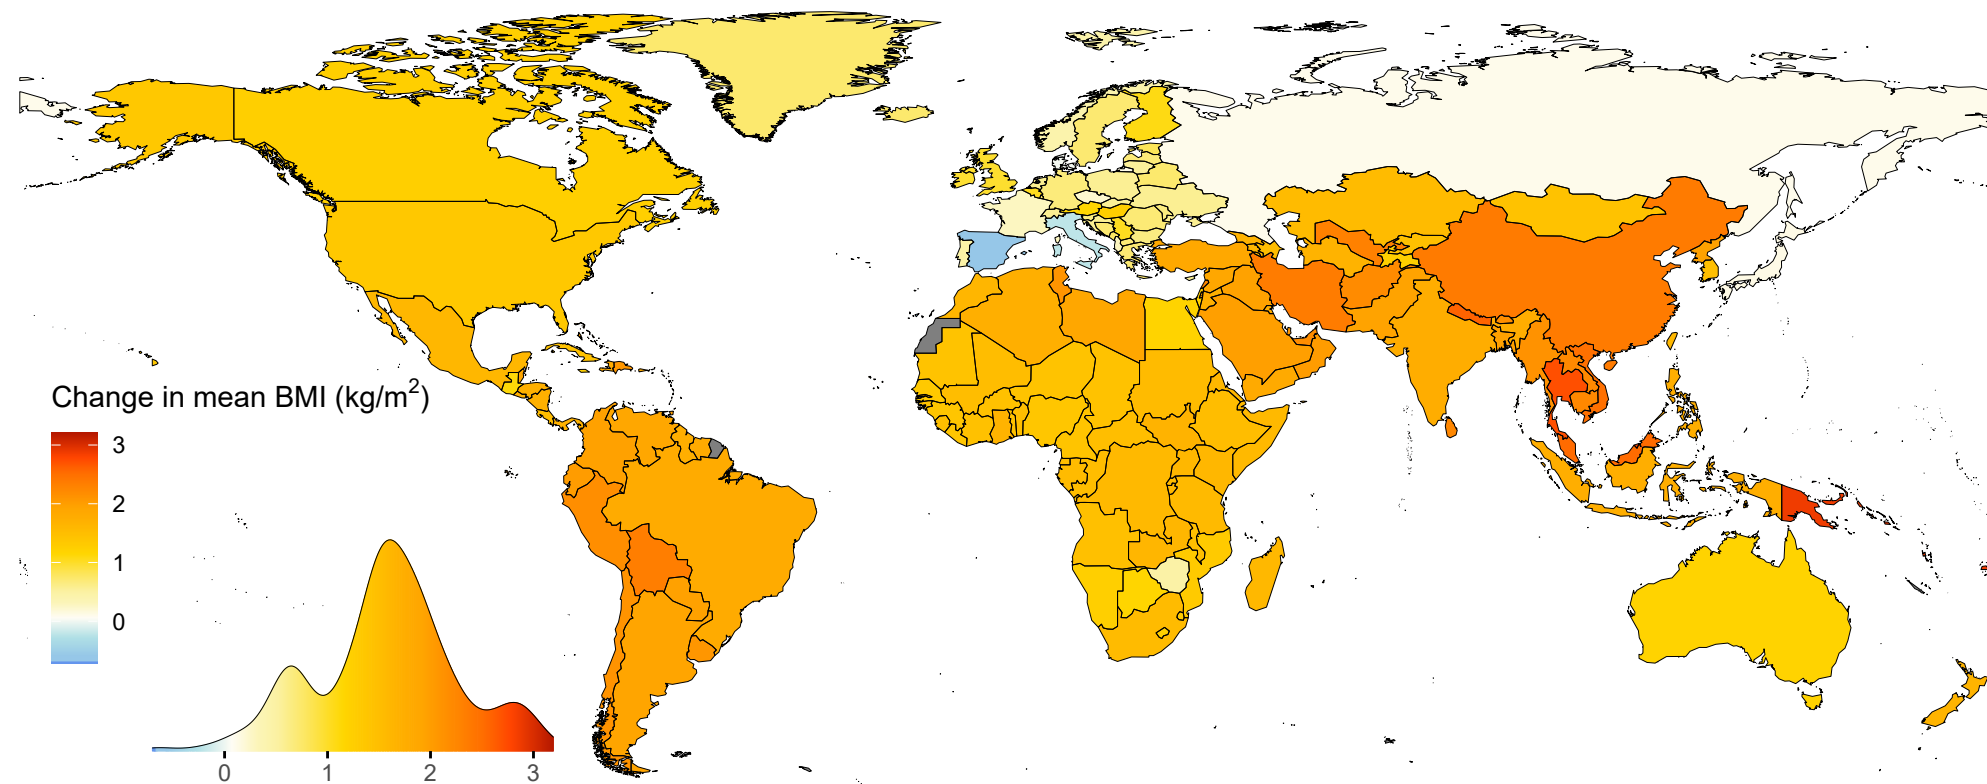

Change in mean BMI (kg/m<sup>2</sup>)

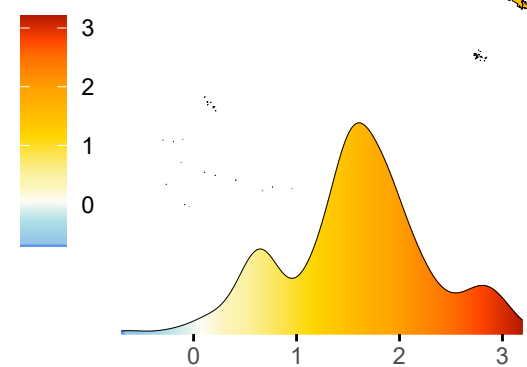

- |                                                          |                                                                        |                                                              |                                                        |
|----------------------------------------------------------|------------------------------------------------------------------------|--------------------------------------------------------------|--------------------------------------------------------|
| <span style="color: #e67e22;">■</span> American Samoa    | <span style="color: #e67e22;">■</span> Fiji                            | <span style="color: #f1c40f;">■</span> Montenegro            | <span style="color: #f1c40f;">■</span> Seychelles      |
| <span style="color: #e67e22;">■</span> Bahrain           | <span style="color: #e67e22;">■</span> French Polynesia                | <span style="color: #8e44ad;">■</span> Nauru                 | <span style="color: #e67e22;">■</span> Solomon Islands |
| <span style="color: #e67e22;">■</span> Bermuda           | <span style="color: #e67e22;">■</span> Kiribati                        | <span style="color: #8e44ad;">■</span> Niue                  | <span style="color: #8e44ad;">■</span> Tokelau         |
| <span style="color: #e67e22;">■</span> Brunei Darussalam | <span style="color: #e67e22;">■</span> Maldives                        | <span style="color: #e67e22;">■</span> Palau                 | <span style="color: #e67e22;">■</span> Tonga           |
| <span style="color: #e67e22;">■</span> Cape Verde        | <span style="color: #e67e22;">■</span> Marshall Islands                | <span style="color: #e67e22;">■</span> Samoa                 | <span style="color: #e67e22;">■</span> Tuvalu          |
| <span style="color: #e67e22;">■</span> Comoros           | <span style="color: #e67e22;">■</span> Mauritius                       | <span style="color: #e67e22;">■</span> Sao Tome and Principe | <span style="color: #e67e22;">■</span> Vanuatu         |
| <span style="color: #e67e22;">■</span> Cook Islands      | <span style="color: #e67e22;">■</span> Mirconesia, Federated States of |                                                              |                                                        |

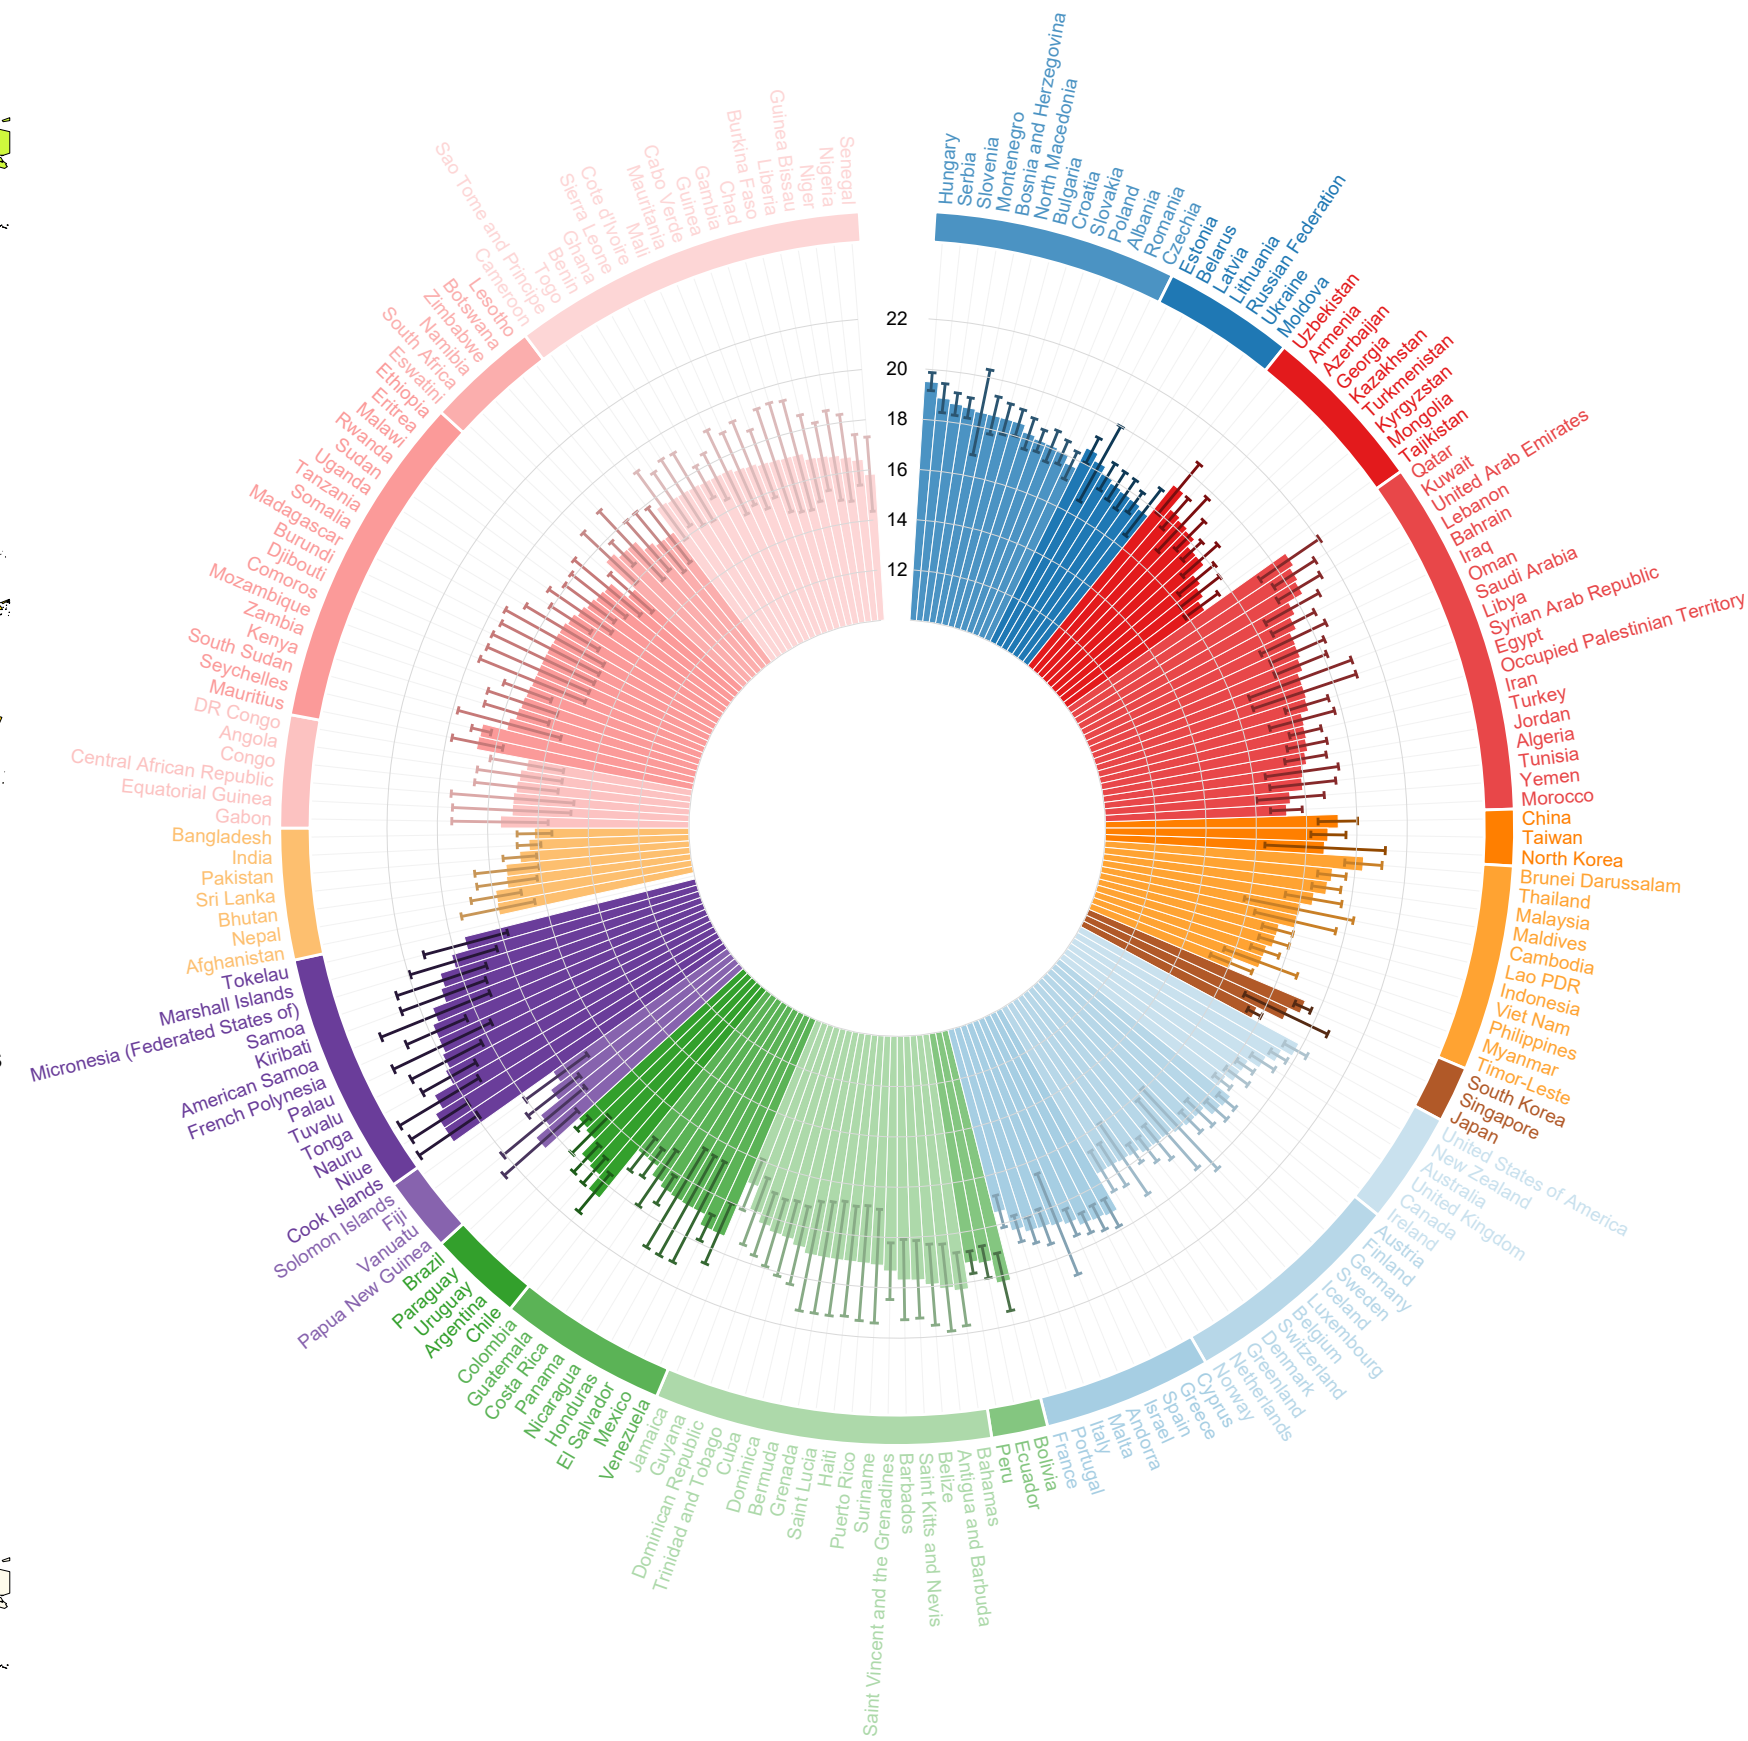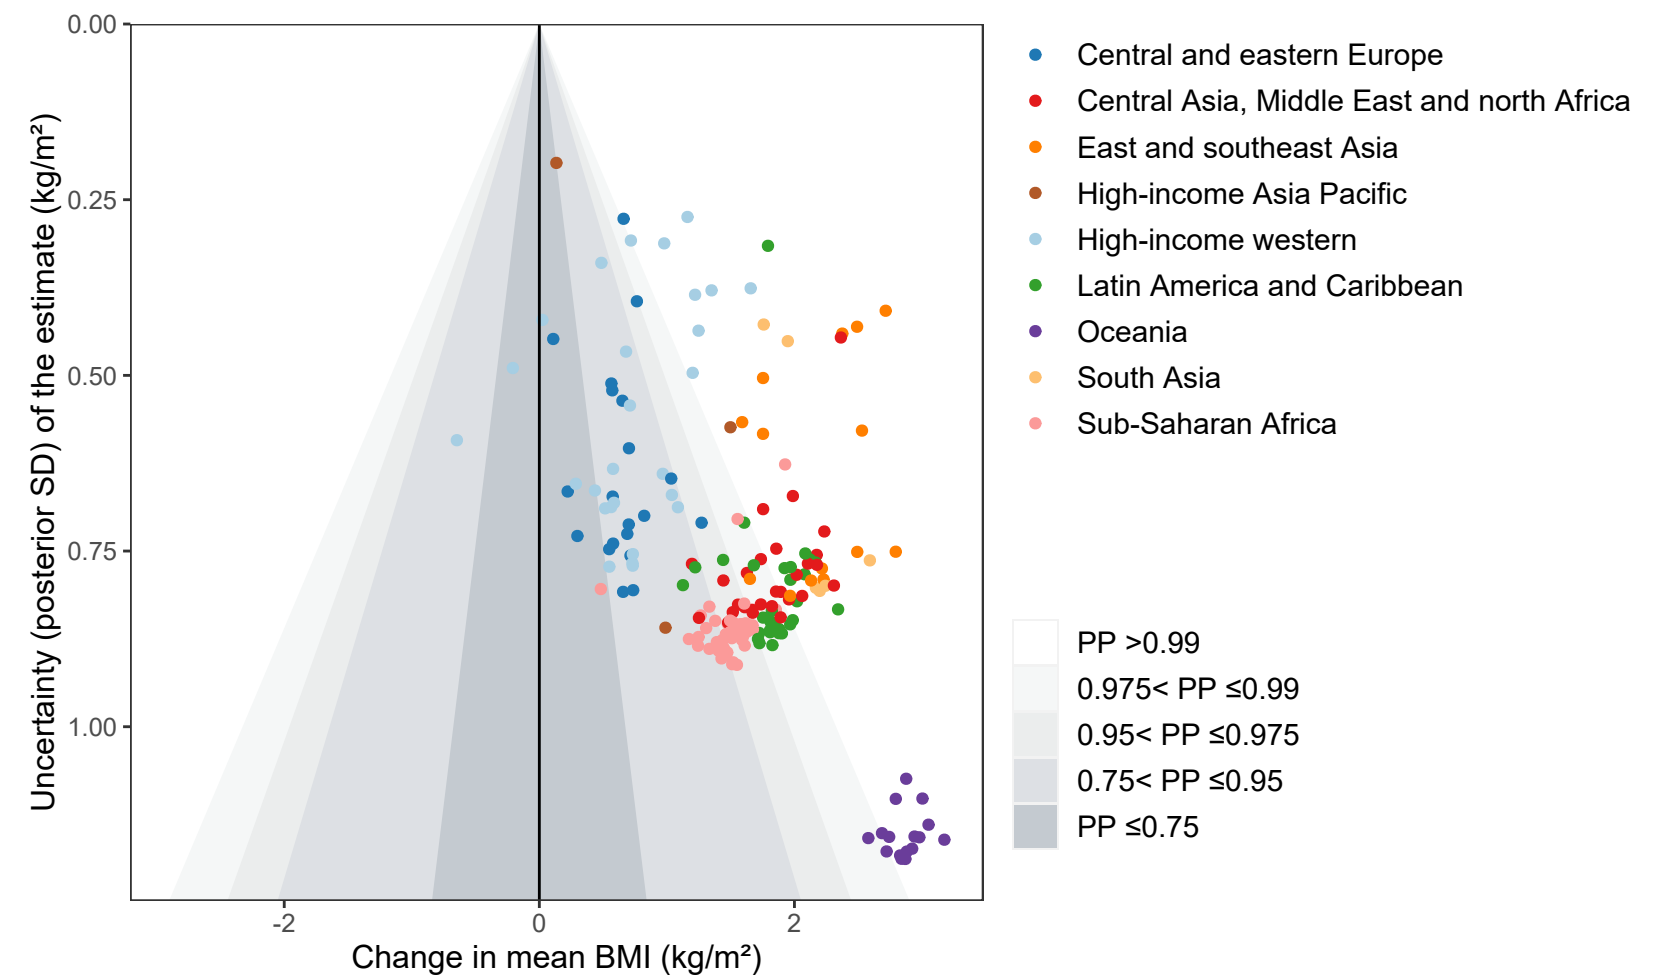



Mean BMI in 2020 (boys, age 10, rural)

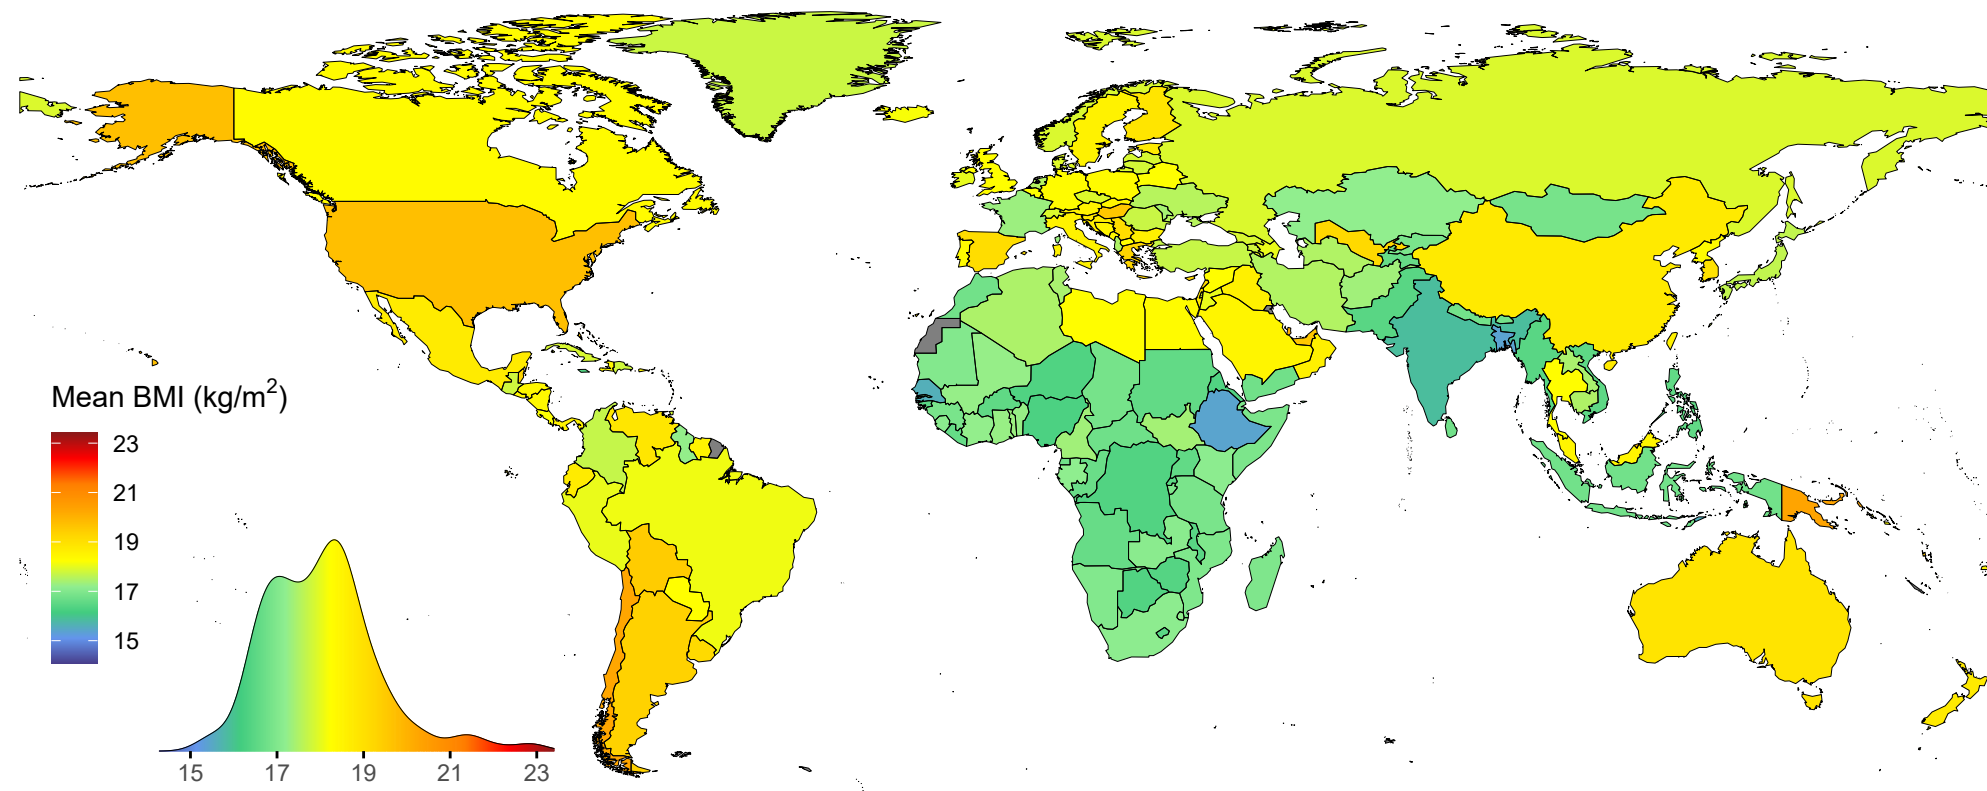

- |                                                          |                                                                        |                                                              |                                                        |
|----------------------------------------------------------|------------------------------------------------------------------------|--------------------------------------------------------------|--------------------------------------------------------|
| <span style="color: #e67e22;">■</span> American Samoa    | <span style="color: #f1c40f;">■</span> Fiji                            | <span style="color: #f1c40f;">■</span> Montenegro            | <span style="color: #f1c40f;">■</span> Seychelles      |
| <span style="color: #e67e22;">■</span> Bahrain           | <span style="color: #e67e22;">■</span> French Polynesia                | <span style="color: #34495e;">■</span> Nauru                 | <span style="color: #f1c40f;">■</span> Solomon Islands |
| <span style="color: #34495e;">■</span> Bermuda           | <span style="color: #e67e22;">■</span> Kiribati                        | <span style="color: #c0392b;">■</span> Niue                  | <span style="color: #c0392b;">■</span> Tokelau         |
| <span style="color: #e67e22;">■</span> Brunei Darussalam | <span style="color: #f1c40f;">■</span> Maldives                        | <span style="color: #e67e22;">■</span> Palau                 | <span style="color: #e67e22;">■</span> Tonga           |
| <span style="color: #27ae60;">■</span> Cape Verde        | <span style="color: #f1c40f;">■</span> Marshall Islands                | <span style="color: #e67e22;">■</span> Samoa                 | <span style="color: #e67e22;">■</span> Tuvalu          |
| <span style="color: #27ae60;">■</span> Comoros           | <span style="color: #f1c40f;">■</span> Mauritius                       | <span style="color: #27ae60;">■</span> Sao Tome and Principe | <span style="color: #f1c40f;">■</span> Vanuatu         |
| <span style="color: #c0392b;">■</span> Cook Islands      | <span style="color: #e67e22;">■</span> Mirconesia, Federated States of |                                                              |                                                        |

Change 1990-2020 (boys, age 10, rural)



- |                                                          |                                                                        |                                                              |                                                        |
|----------------------------------------------------------|------------------------------------------------------------------------|--------------------------------------------------------------|--------------------------------------------------------|
| <span style="color: #c0392b;">■</span> American Samoa    | <span style="color: #c0392b;">■</span> Fiji                            | <span style="color: #f1c40f;">■</span> Montenegro            | <span style="color: #e67e22;">■</span> Seychelles      |
| <span style="color: #e67e22;">■</span> Bahrain           | <span style="color: #c0392b;">■</span> French Polynesia                | <span style="color: #34495e;">■</span> Nauru                 | <span style="color: #c0392b;">■</span> Solomon Islands |
| <span style="color: #34495e;">■</span> Bermuda           | <span style="color: #c0392b;">■</span> Kiribati                        | <span style="color: #c0392b;">■</span> Niue                  | <span style="color: #c0392b;">■</span> Tokelau         |
| <span style="color: #e67e22;">■</span> Brunei Darussalam | <span style="color: #e67e22;">■</span> Maldives                        | <span style="color: #e67e22;">■</span> Palau                 | <span style="color: #c0392b;">■</span> Tonga           |
| <span style="color: #e67e22;">■</span> Cape Verde        | <span style="color: #e67e22;">■</span> Marshall Islands                | <span style="color: #e67e22;">■</span> Samoa                 | <span style="color: #c0392b;">■</span> Tuvalu          |
| <span style="color: #e67e22;">■</span> Comoros           | <span style="color: #e67e22;">■</span> Mauritius                       | <span style="color: #f1c40f;">■</span> Sao Tome and Principe | <span style="color: #c0392b;">■</span> Vanuatu         |
| <span style="color: #c0392b;">■</span> Cook Islands      | <span style="color: #e67e22;">■</span> Mirconesia, Federated States of |                                                              |                                                        |

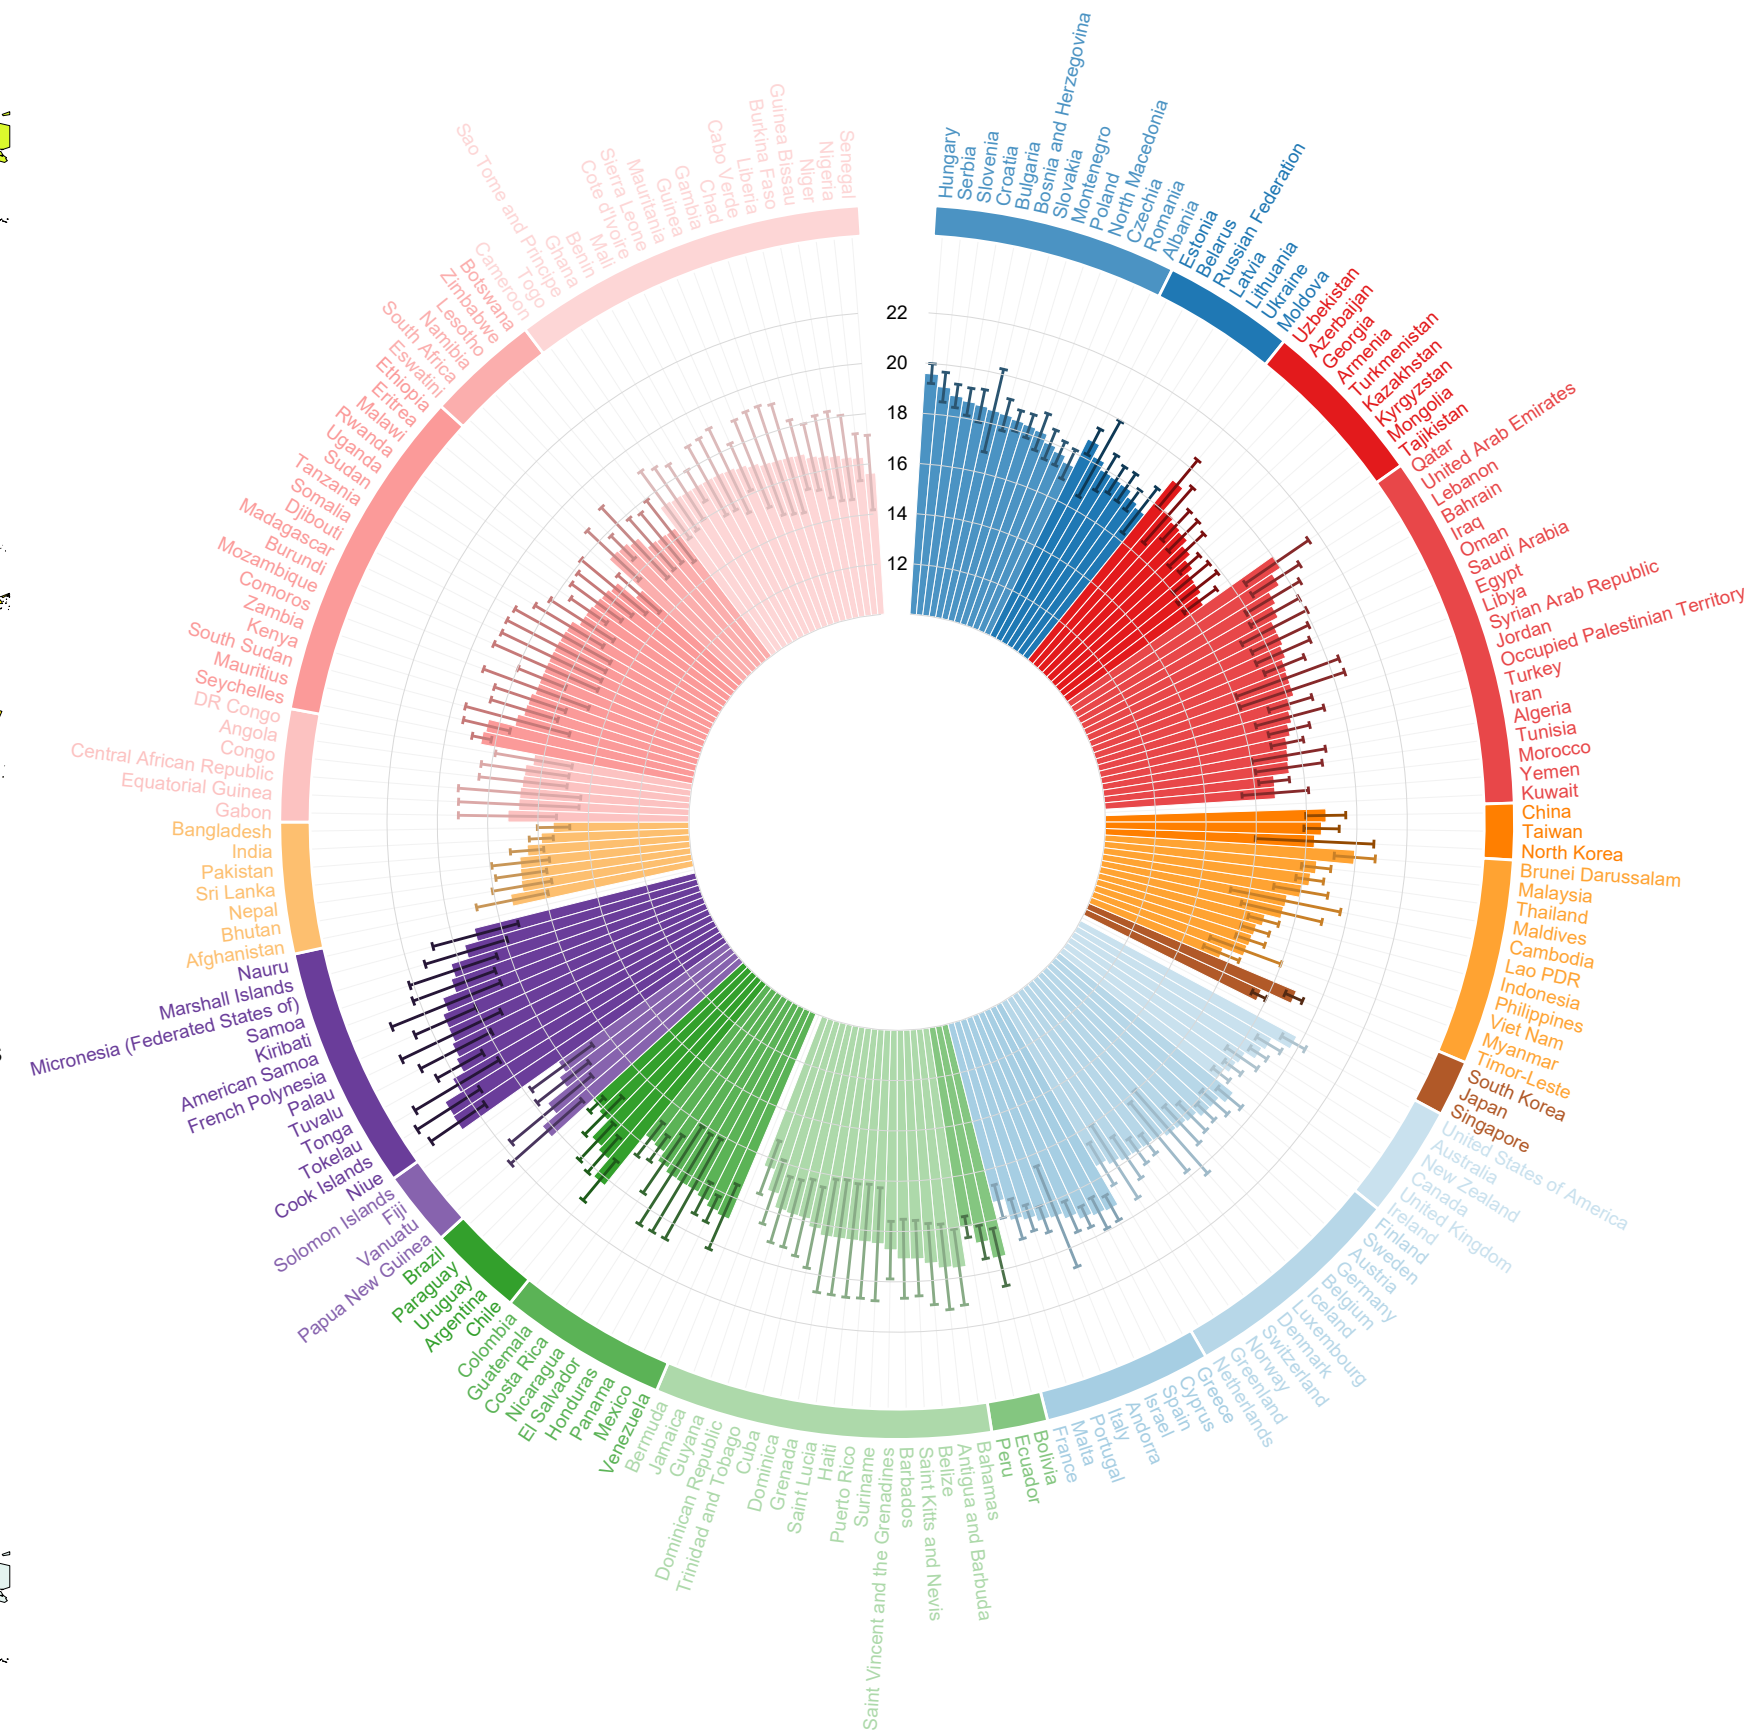



Mean BMI in 2020 (girls, age 15, urban)

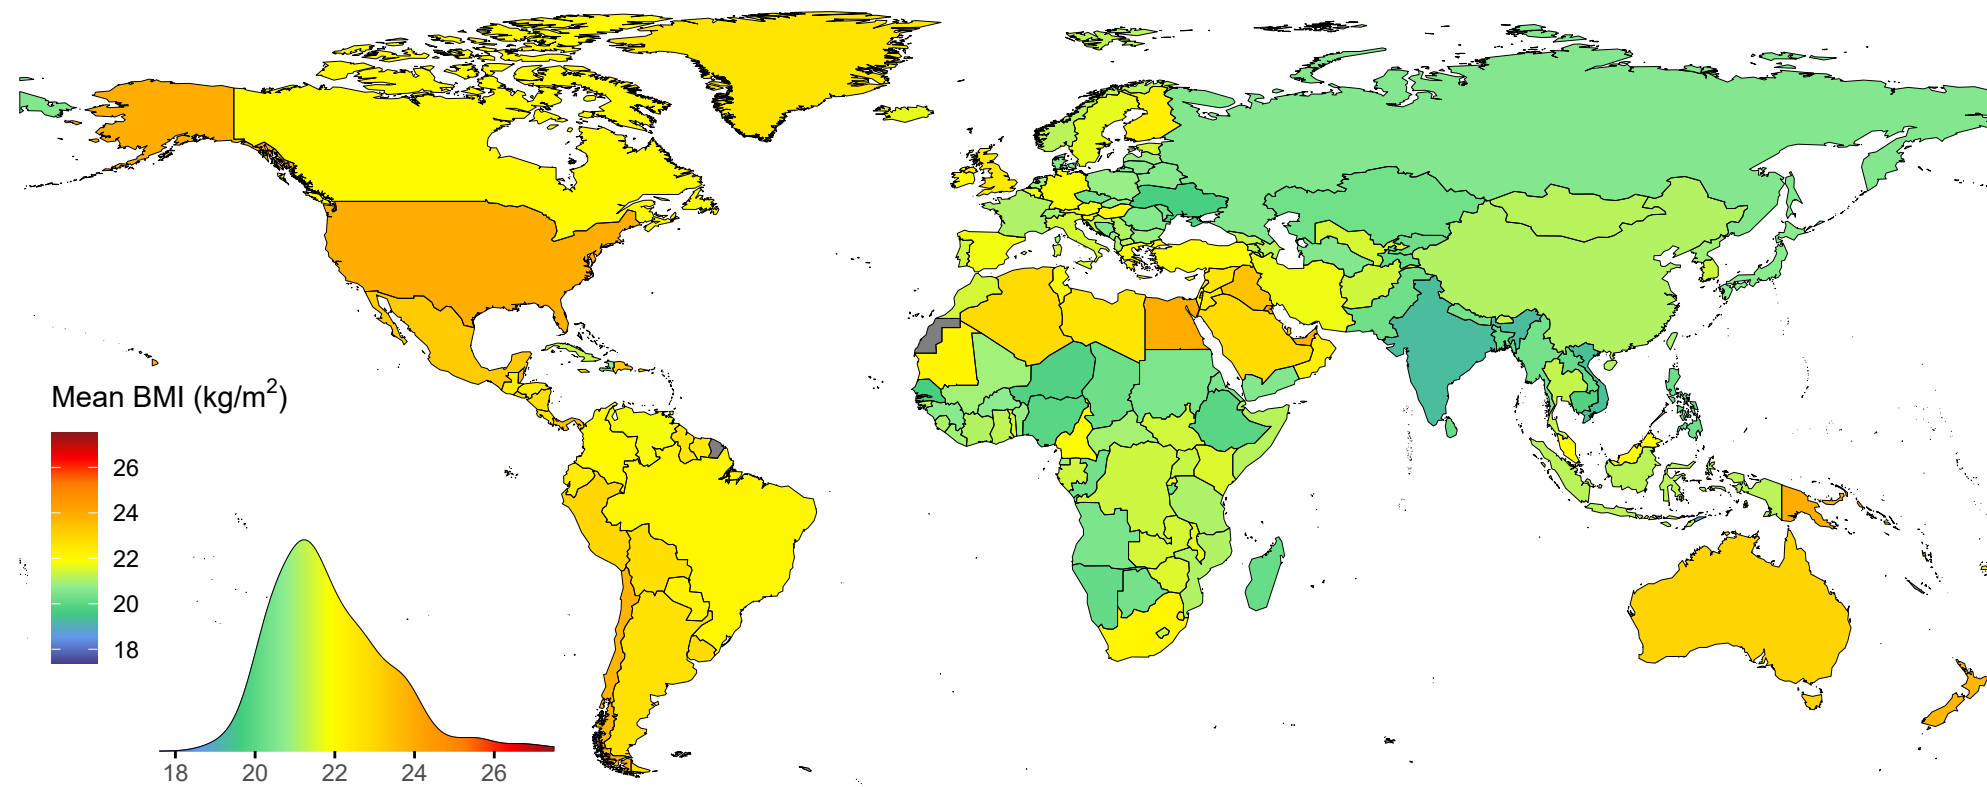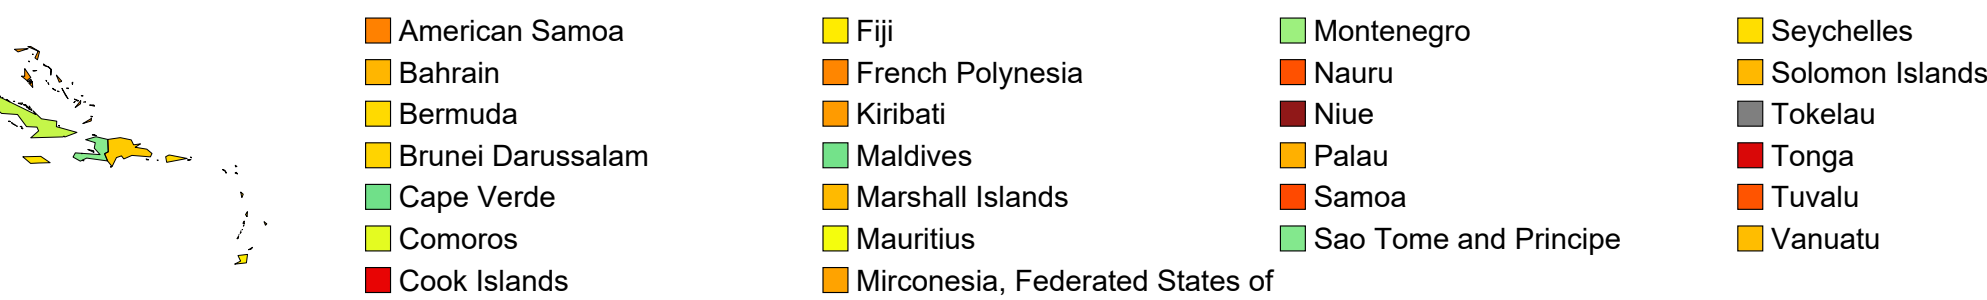

Change 1990-2020 (girls, age 15, urban)

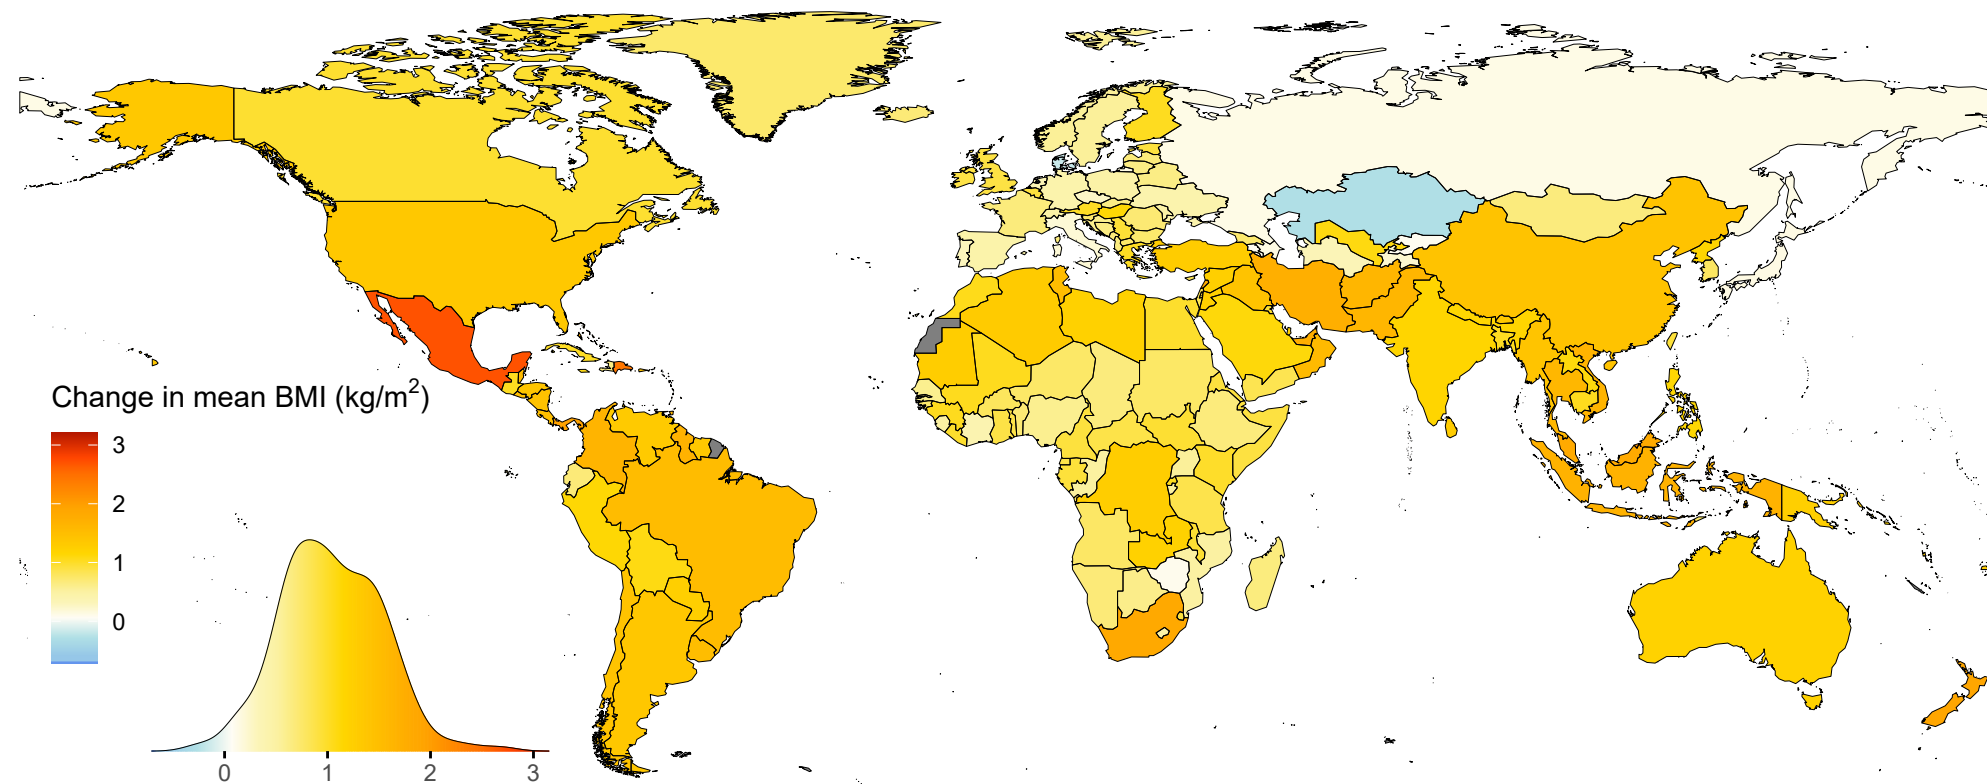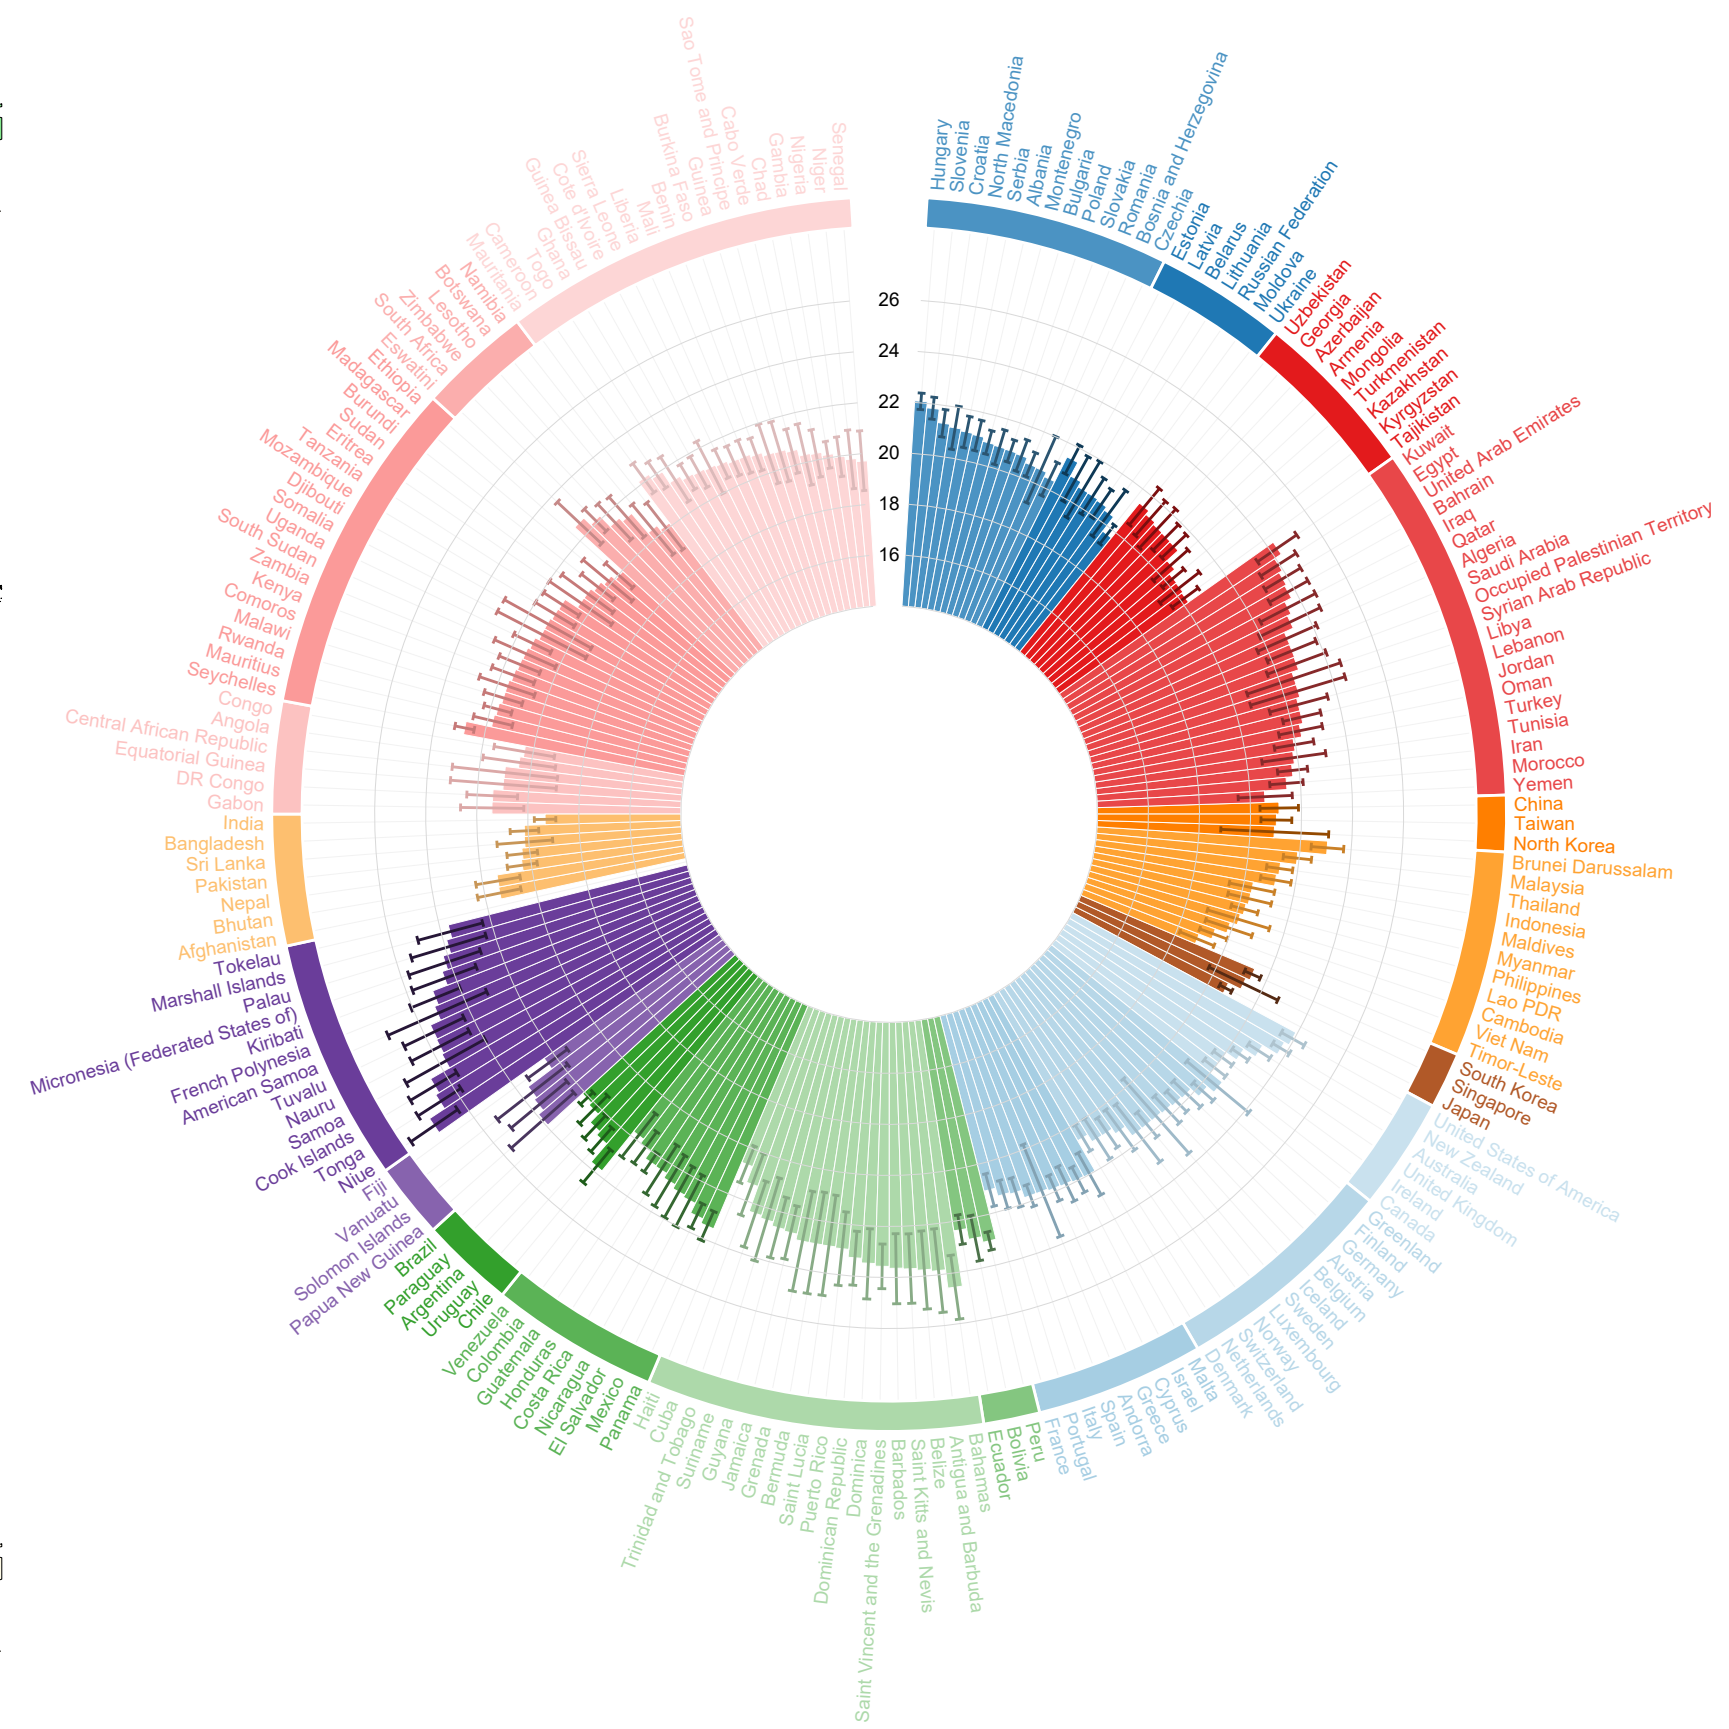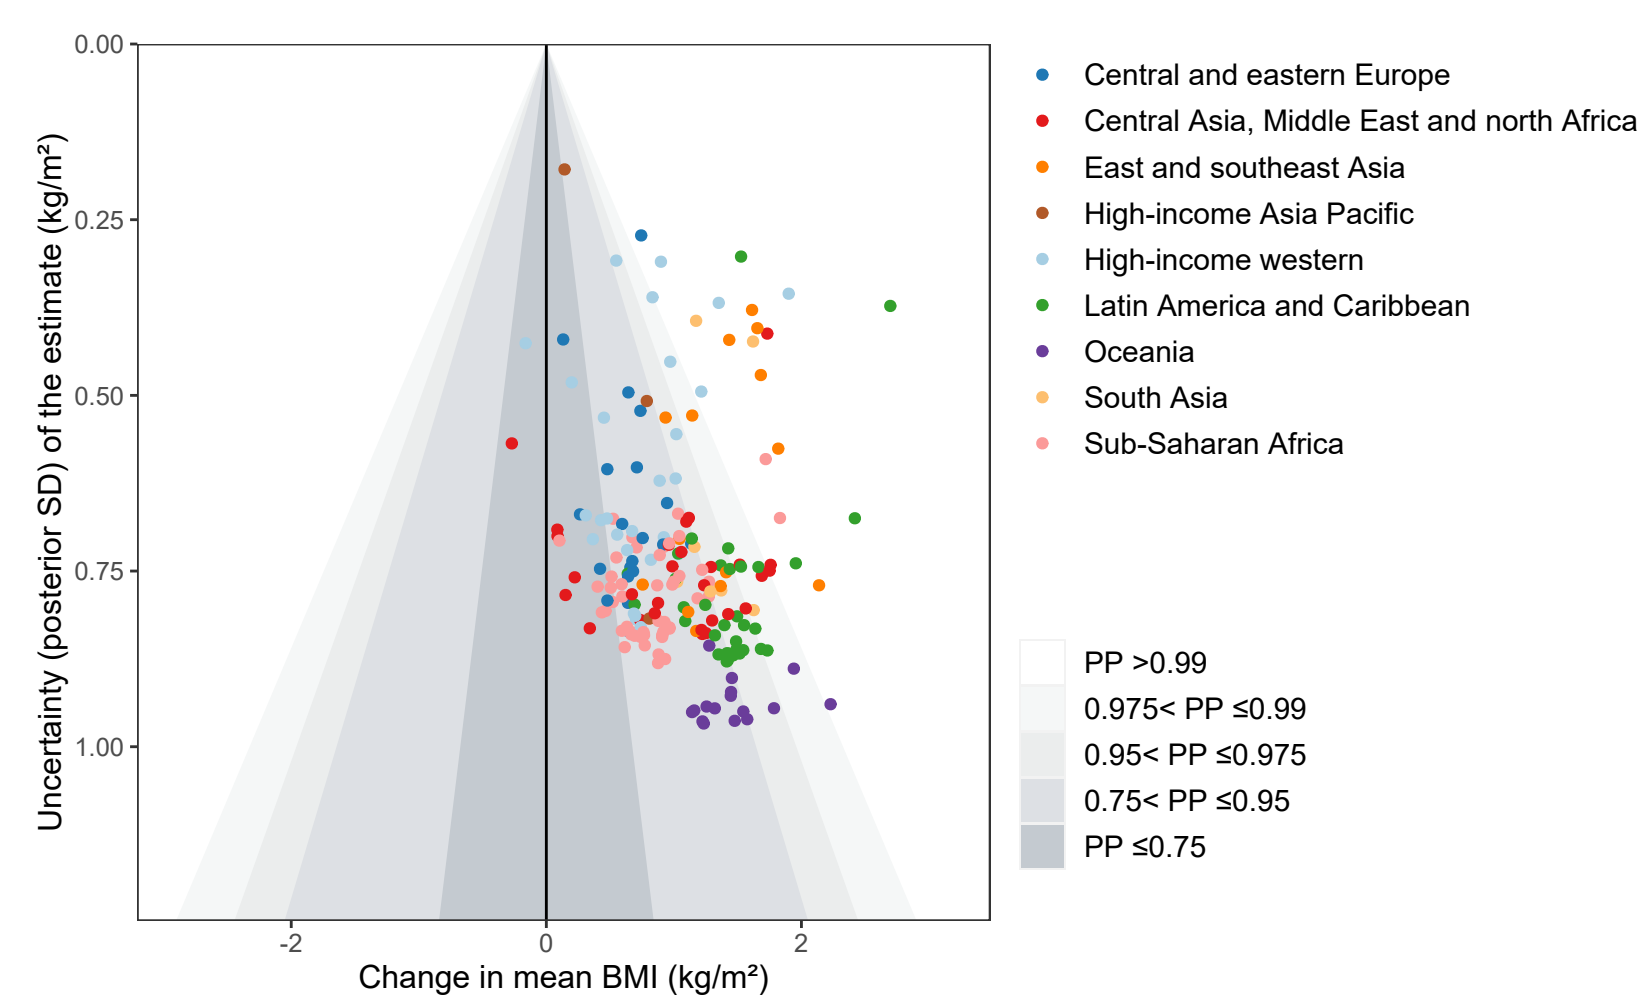



Mean BMI in 2020 (girls, age 15, rural)

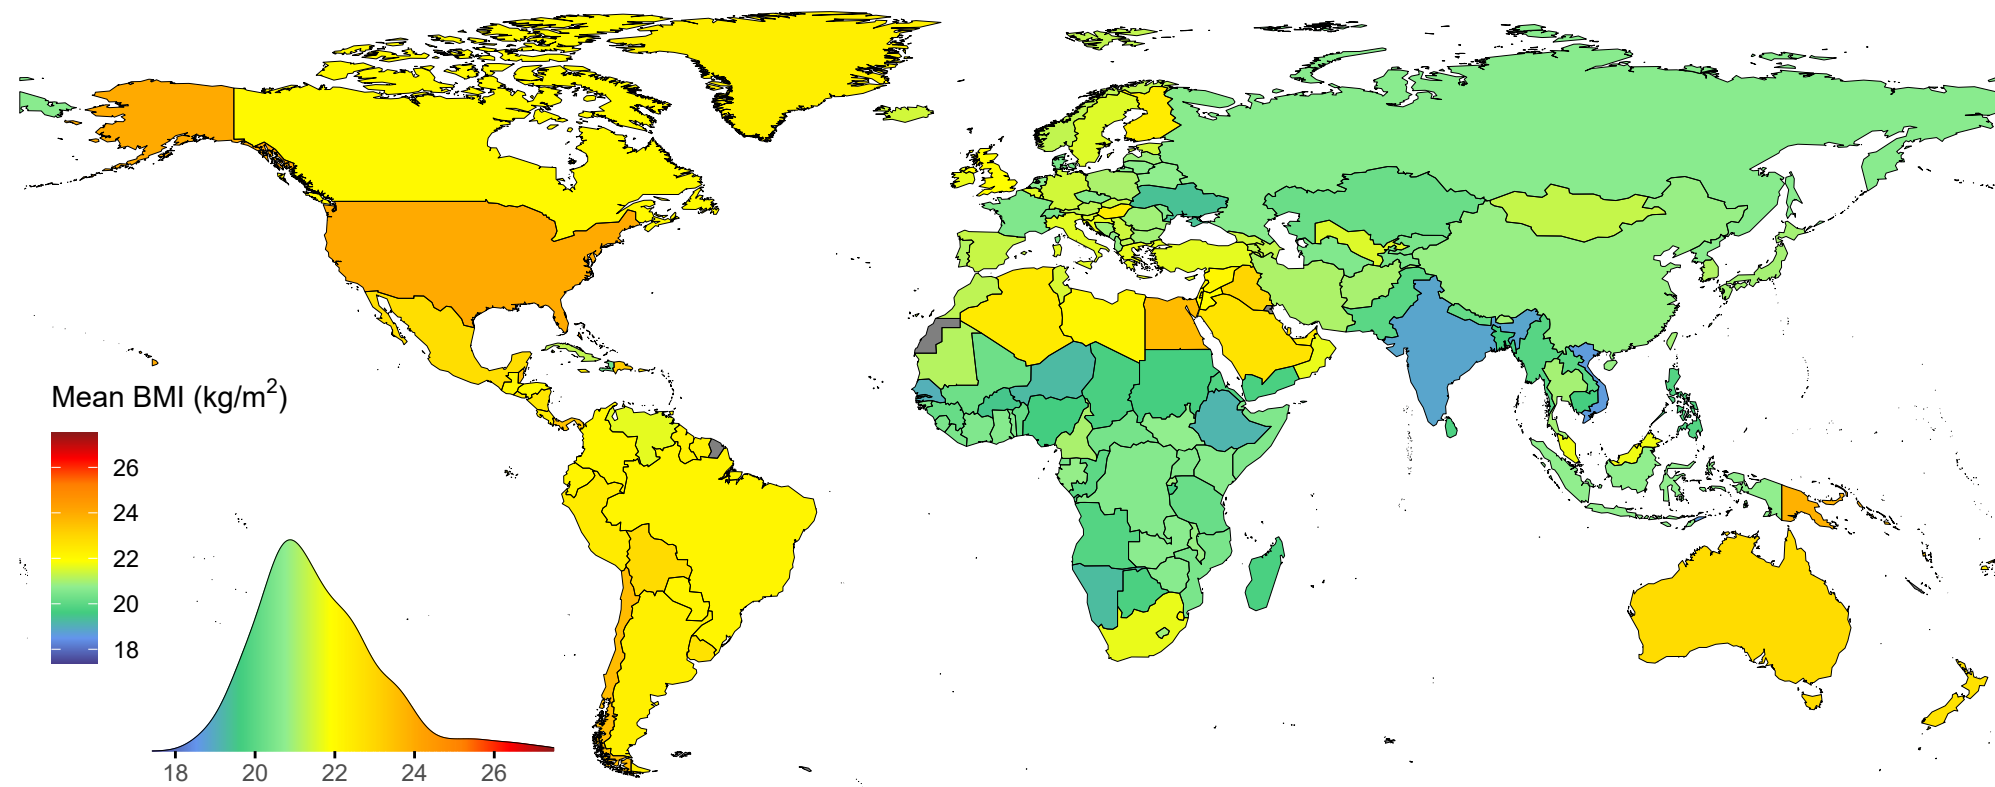

- |                                                          |                                                                        |                                                              |                                                        |
|----------------------------------------------------------|------------------------------------------------------------------------|--------------------------------------------------------------|--------------------------------------------------------|
| <span style="color: #e67e22;">■</span> American Samoa    | <span style="color: #f1c40f;">■</span> Fiji                            | <span style="color: #27ae60;">■</span> Montenegro            | <span style="color: #f1c40f;">■</span> Seychelles      |
| <span style="color: #e67e22;">■</span> Bahrain           | <span style="color: #e67e22;">■</span> French Polynesia                | <span style="color: #34495e;">■</span> Nauru                 | <span style="color: #f1c40f;">■</span> Solomon Islands |
| <span style="color: #34495e;">■</span> Bermuda           | <span style="color: #e67e22;">■</span> Kiribati                        | <span style="color: #8e44ad;">■</span> Niue                  | <span style="color: #e67e22;">■</span> Tokelau         |
| <span style="color: #f1c40f;">■</span> Brunei Darussalam | <span style="color: #27ae60;">■</span> Maldives                        | <span style="color: #e67e22;">■</span> Palau                 | <span style="color: #e67e22;">■</span> Tonga           |
| <span style="color: #27ae60;">■</span> Cape Verde        | <span style="color: #e67e22;">■</span> Marshall Islands                | <span style="color: #e67e22;">■</span> Samoa                 | <span style="color: #e67e22;">■</span> Tuvalu          |
| <span style="color: #27ae60;">■</span> Comoros           | <span style="color: #27ae60;">■</span> Mauritius                       | <span style="color: #27ae60;">■</span> Sao Tome and Principe | <span style="color: #e67e22;">■</span> Vanuatu         |
| <span style="color: #e67e22;">■</span> Cook Islands      | <span style="color: #e67e22;">■</span> Mirconesia, Federated States of |                                                              |                                                        |

Change 1990-2020 (girls, age 15, rural)

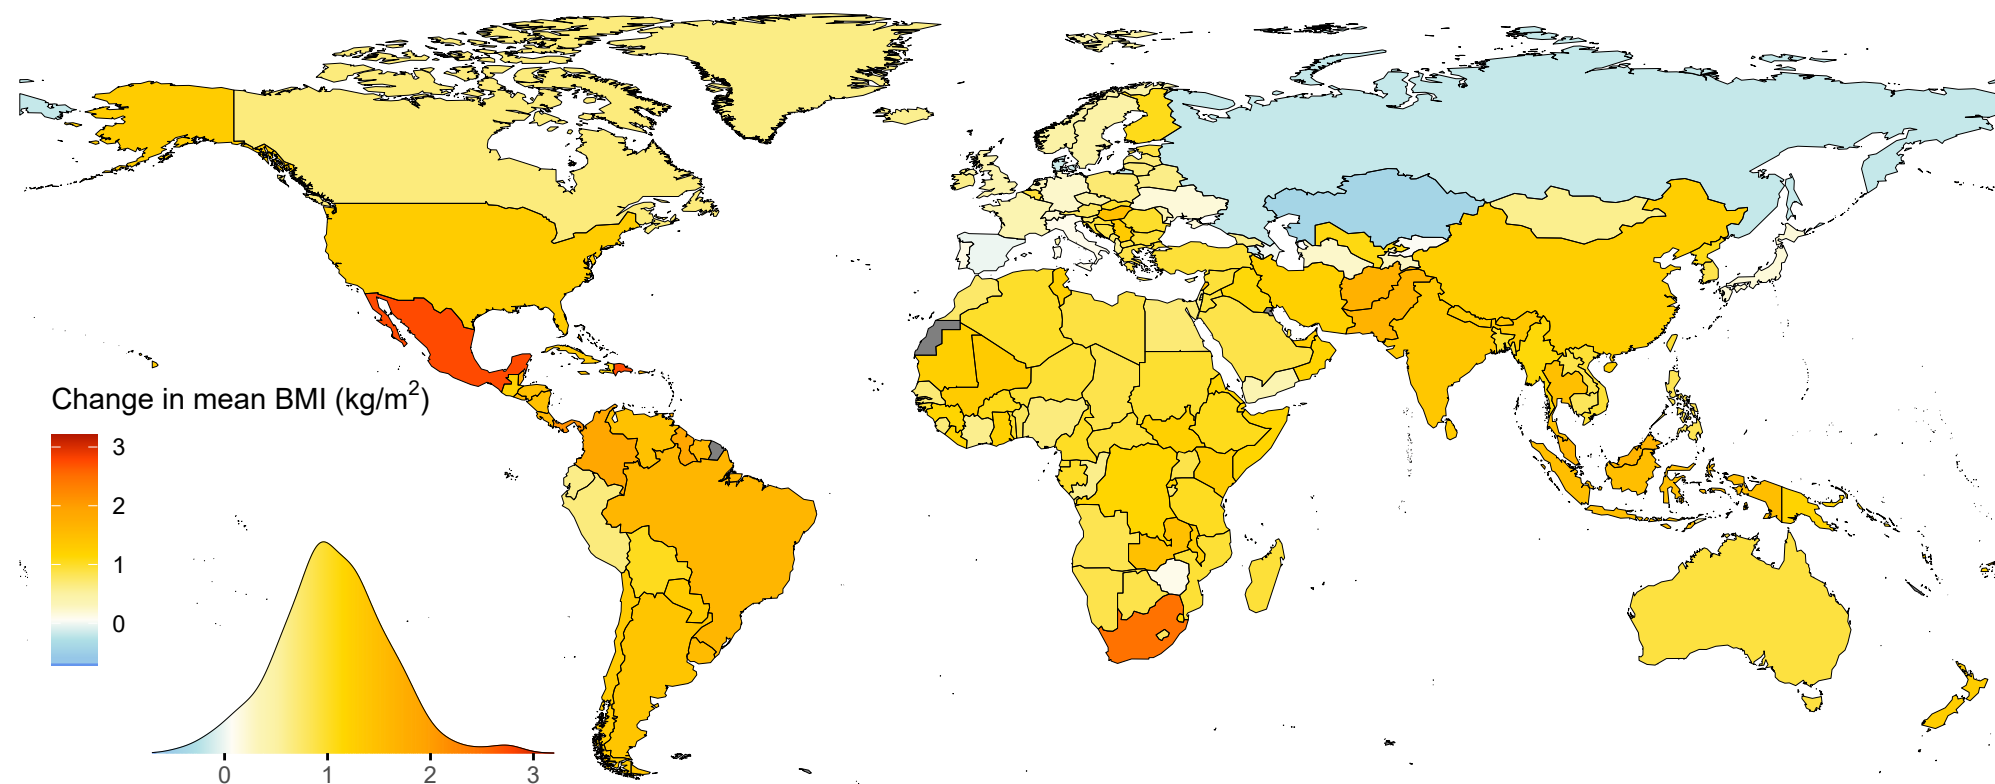

- |                                                          |                                                                        |                                                              |                                                        |
|----------------------------------------------------------|------------------------------------------------------------------------|--------------------------------------------------------------|--------------------------------------------------------|
| <span style="color: #f1c40f;">■</span> American Samoa    | <span style="color: #f1c40f;">■</span> Fiji                            | <span style="color: #f1c40f;">■</span> Montenegro            | <span style="color: #e67e22;">■</span> Seychelles      |
| <span style="color: #f1c40f;">■</span> Bahrain           | <span style="color: #f1c40f;">■</span> French Polynesia                | <span style="color: #34495e;">■</span> Nauru                 | <span style="color: #f1c40f;">■</span> Solomon Islands |
| <span style="color: #34495e;">■</span> Bermuda           | <span style="color: #f1c40f;">■</span> Kiribati                        | <span style="color: #8e44ad;">■</span> Niue                  | <span style="color: #f1c40f;">■</span> Tokelau         |
| <span style="color: #f1c40f;">■</span> Brunei Darussalam | <span style="color: #f1c40f;">■</span> Maldives                        | <span style="color: #f1c40f;">■</span> Palau                 | <span style="color: #f1c40f;">■</span> Tonga           |
| <span style="color: #f1c40f;">■</span> Cape Verde        | <span style="color: #f1c40f;">■</span> Marshall Islands                | <span style="color: #f1c40f;">■</span> Samoa                 | <span style="color: #f1c40f;">■</span> Tuvalu          |
| <span style="color: #f1c40f;">■</span> Comoros           | <span style="color: #f1c40f;">■</span> Mauritius                       | <span style="color: #f1c40f;">■</span> Sao Tome and Principe | <span style="color: #f1c40f;">■</span> Vanuatu         |
| <span style="color: #f1c40f;">■</span> Cook Islands      | <span style="color: #f1c40f;">■</span> Mirconesia, Federated States of |                                                              |                                                        |

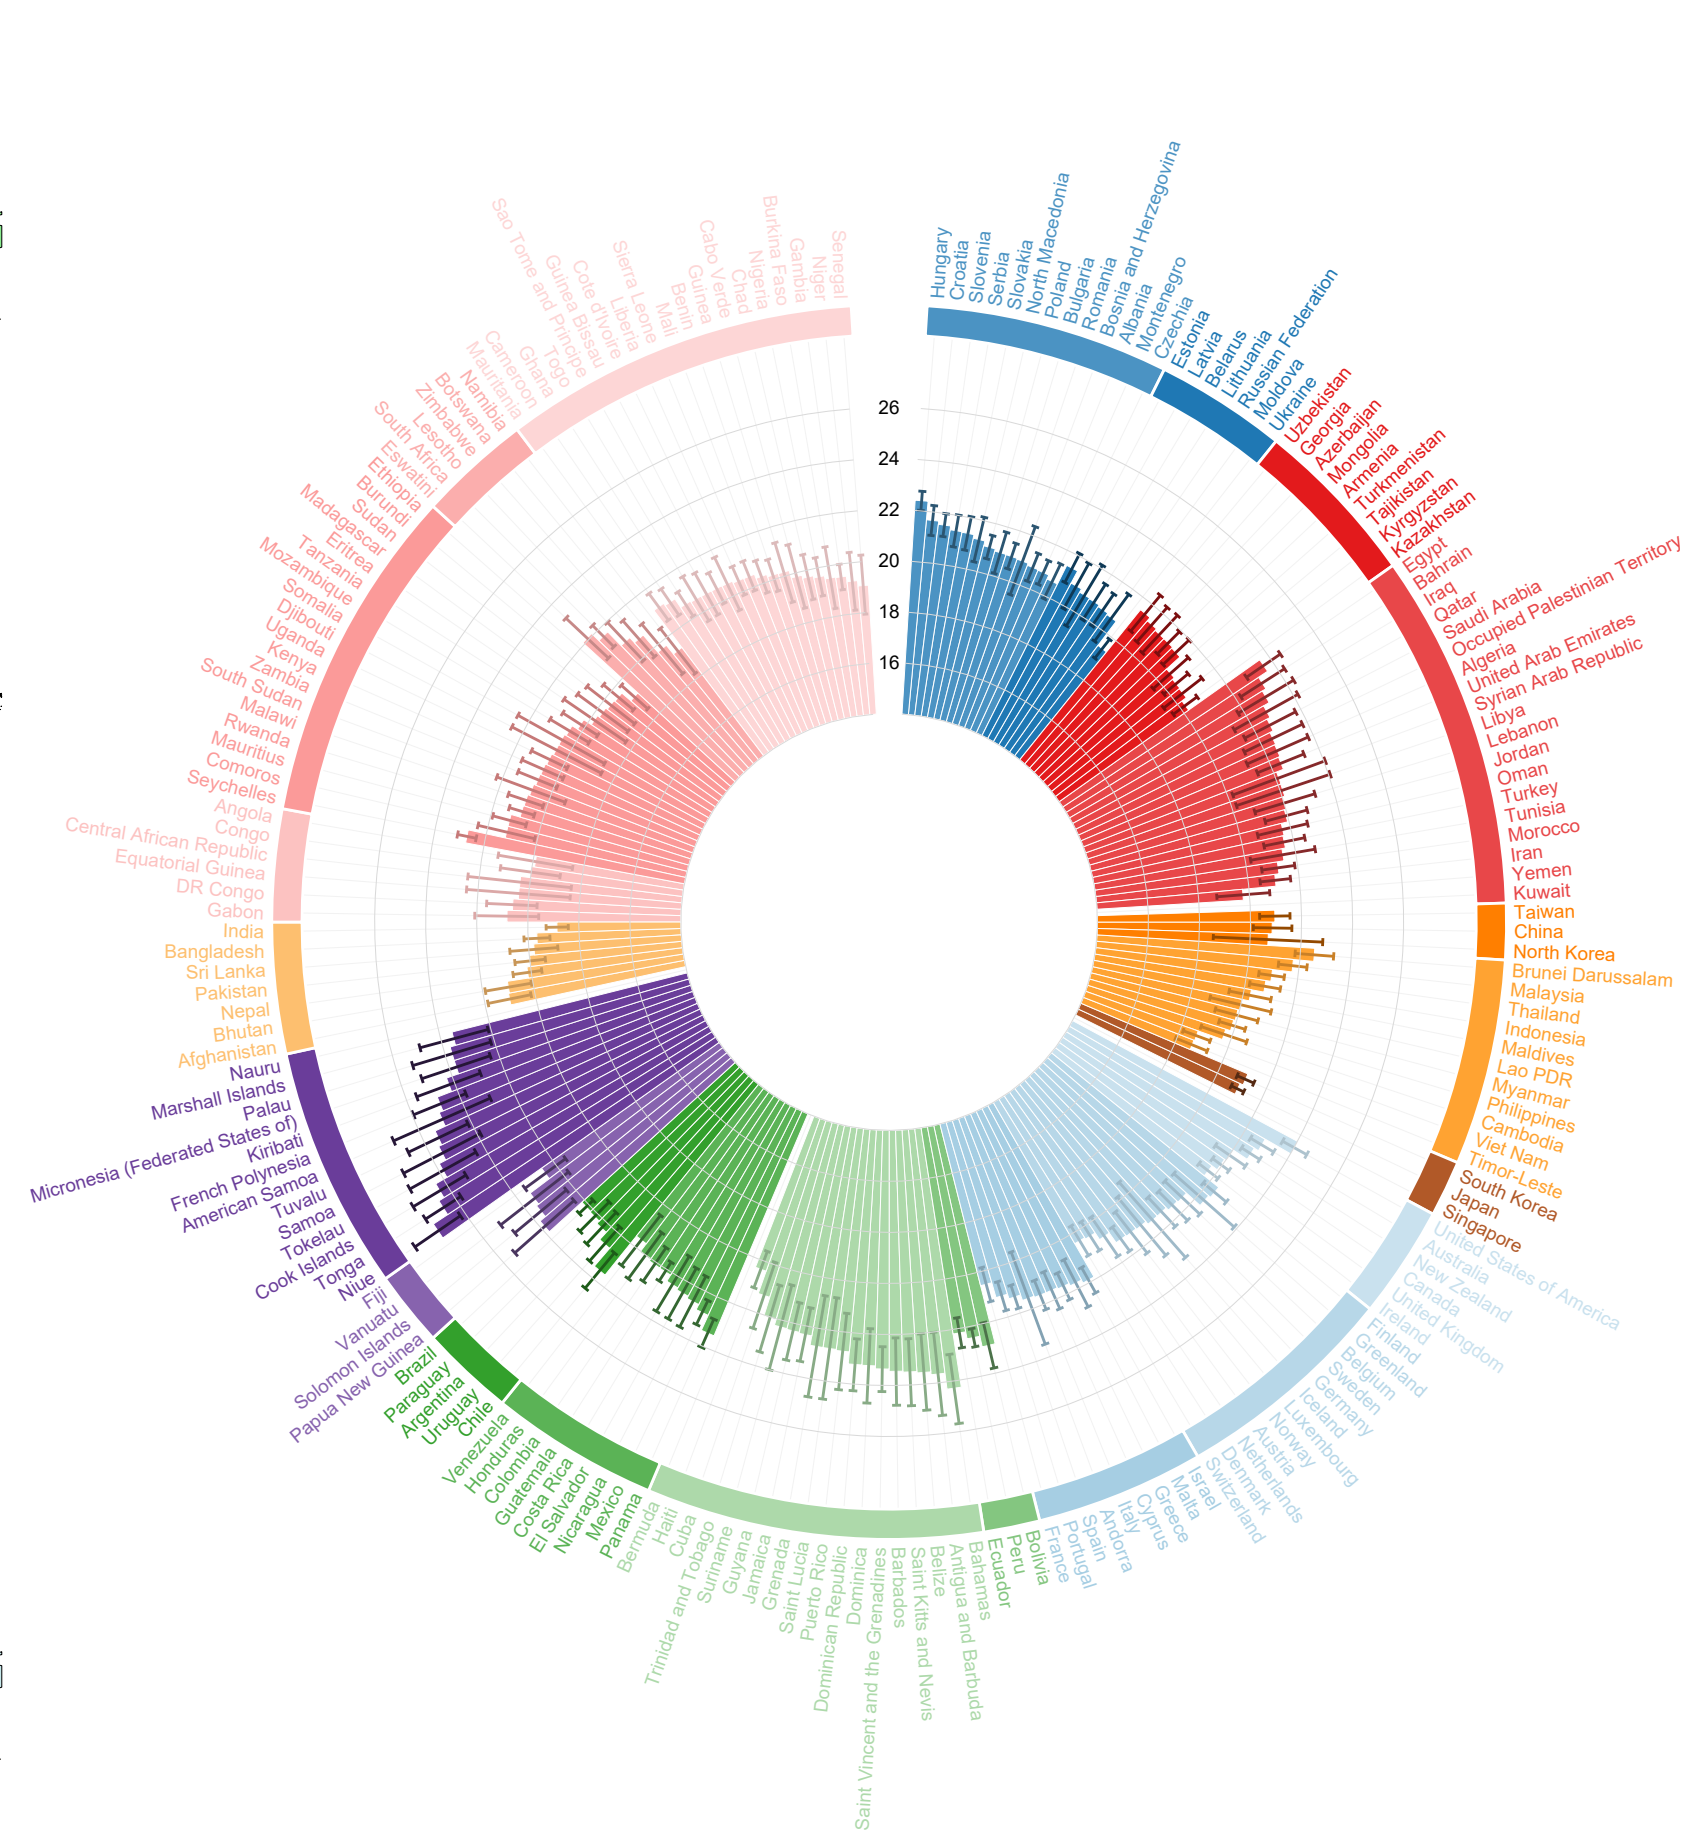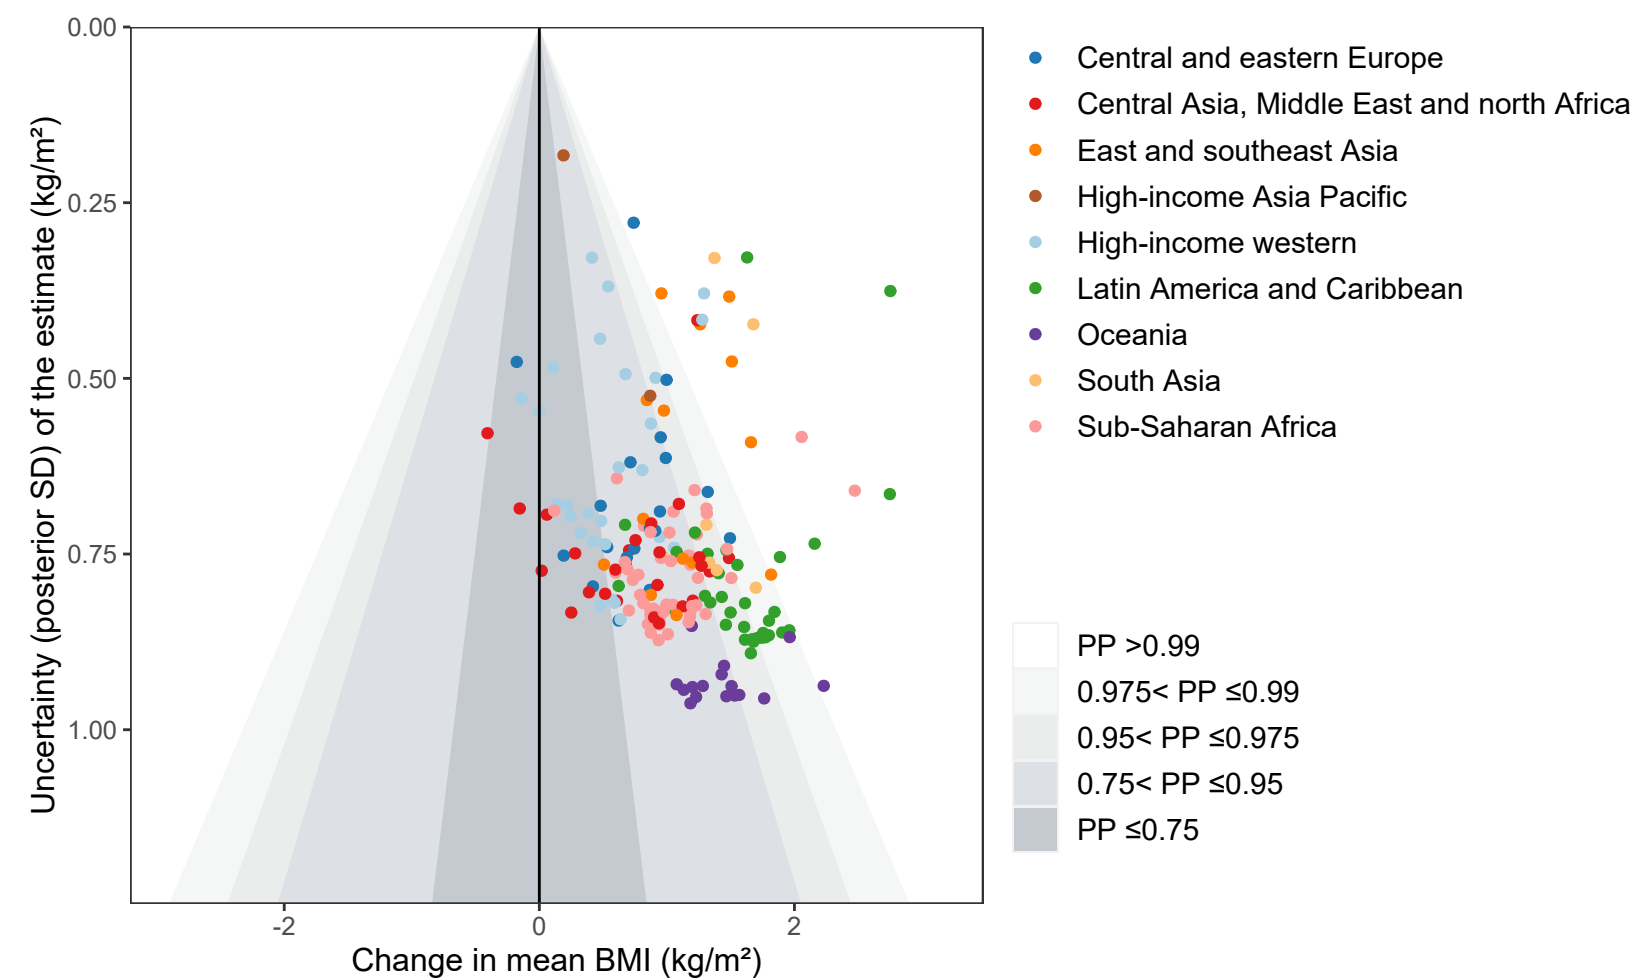



Mean BMI in 2020 (boys, age 15, urban)

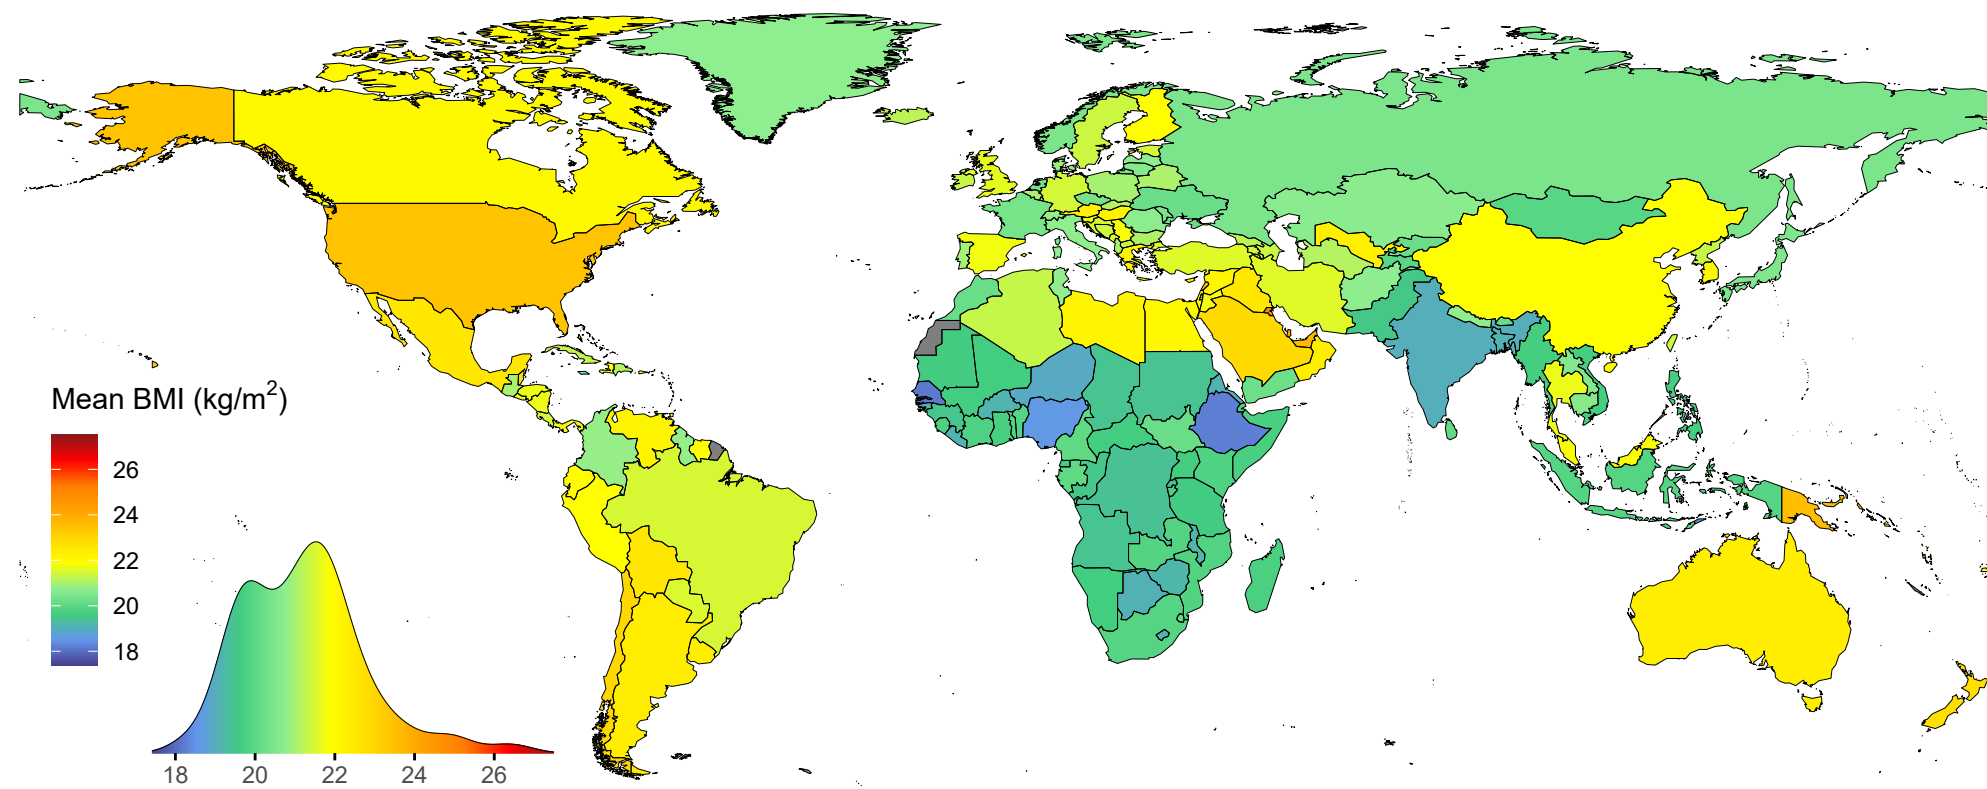

- |                                                          |                                                                        |                                                              |                                                        |
|----------------------------------------------------------|------------------------------------------------------------------------|--------------------------------------------------------------|--------------------------------------------------------|
| <span style="color: #e67e22;">■</span> American Samoa    | <span style="color: #f1c40f;">■</span> Fiji                            | <span style="color: #9b59b6;">■</span> Montenegro            | <span style="color: #27ae60;">■</span> Seychelles      |
| <span style="color: #f1c40f;">■</span> Bahrain           | <span style="color: #e67e22;">■</span> French Polynesia                | <span style="color: #e74c3c;">■</span> Nauru                 | <span style="color: #9b59b6;">■</span> Solomon Islands |
| <span style="color: #f1c40f;">■</span> Bermuda           | <span style="color: #e67e22;">■</span> Kiribati                        | <span style="color: #e74c3c;">■</span> Niue                  | <span style="color: #34495e;">■</span> Tokelau         |
| <span style="color: #f1c40f;">■</span> Brunei Darussalam | <span style="color: #27ae60;">■</span> Maldives                        | <span style="color: #e67e22;">■</span> Palau                 | <span style="color: #e67e22;">■</span> Tonga           |
| <span style="color: #27ae60;">■</span> Cape Verde        | <span style="color: #f1c40f;">■</span> Marshall Islands                | <span style="color: #e67e22;">■</span> Samoa                 | <span style="color: #e67e22;">■</span> Tuvalu          |
| <span style="color: #27ae60;">■</span> Comoros           | <span style="color: #27ae60;">■</span> Mauritius                       | <span style="color: #27ae60;">■</span> Sao Tome and Principe | <span style="color: #f1c40f;">■</span> Vanuatu         |
| <span style="color: #e74c3c;">■</span> Cook Islands      | <span style="color: #e67e22;">■</span> Mirconesia, Federated States of |                                                              |                                                        |

Change 1990-2020 (boys, age 15, urban)

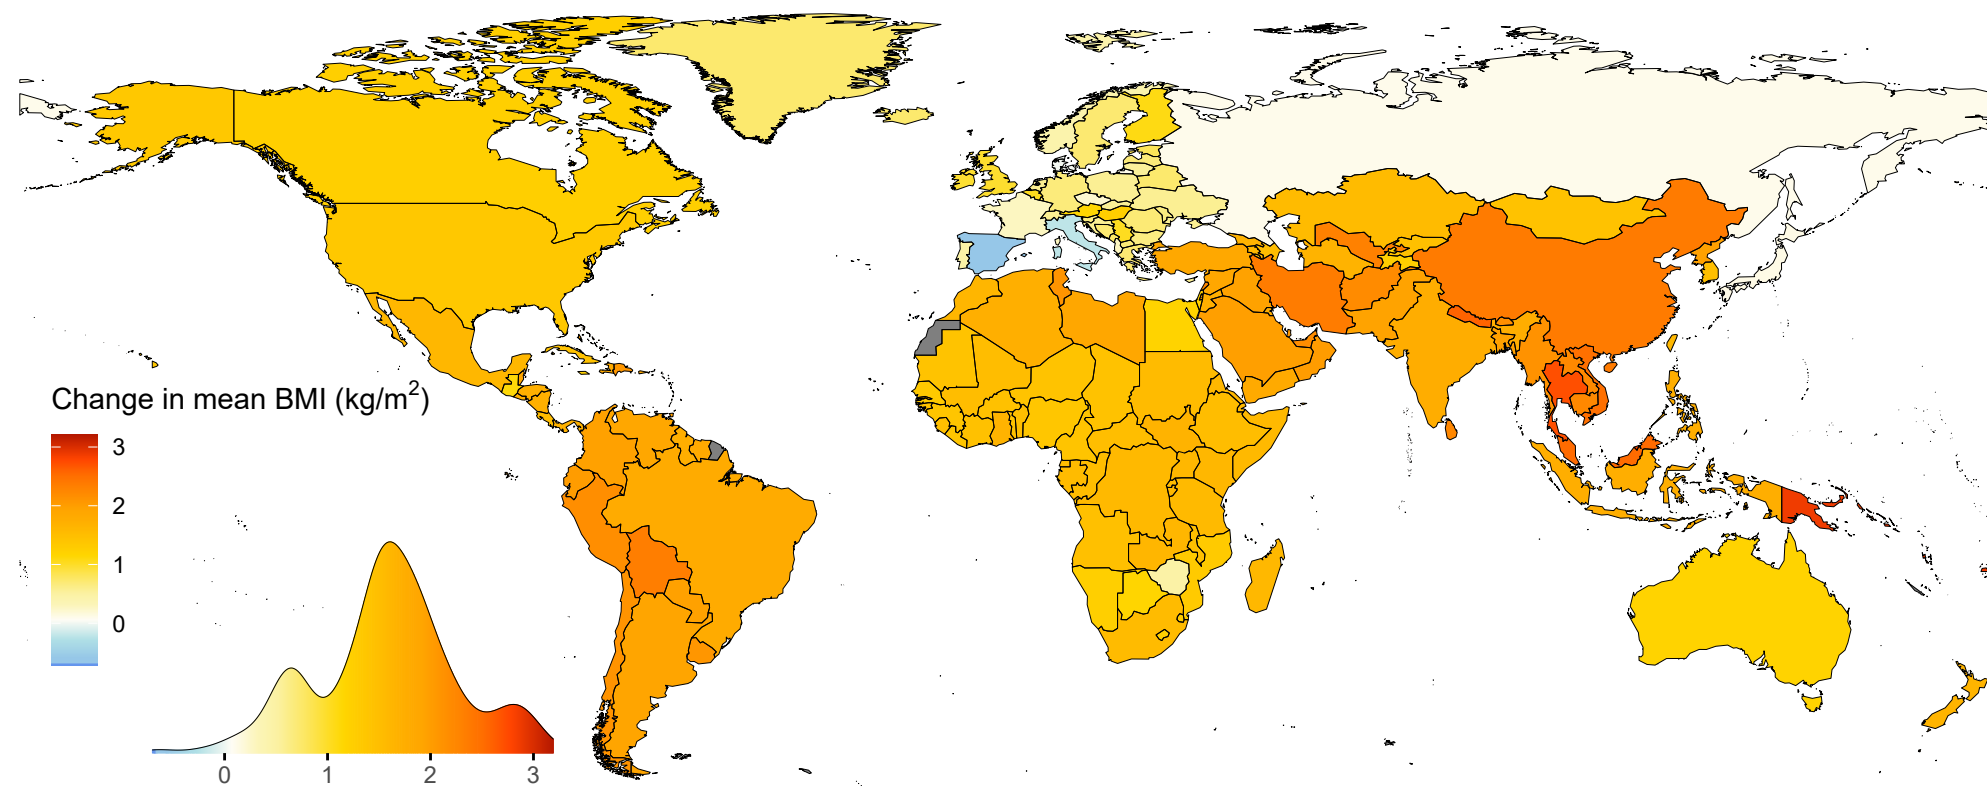

- |                                                          |                                                                        |                                                              |                                                        |
|----------------------------------------------------------|------------------------------------------------------------------------|--------------------------------------------------------------|--------------------------------------------------------|
| <span style="color: #e74c3c;">■</span> American Samoa    | <span style="color: #e74c3c;">■</span> Fiji                            | <span style="color: #f1c40f;">■</span> Montenegro            | <span style="color: #f1c40f;">■</span> Seychelles      |
| <span style="color: #e67e22;">■</span> Bahrain           | <span style="color: #e74c3c;">■</span> French Polynesia                | <span style="color: #e74c3c;">■</span> Nauru                 | <span style="color: #e74c3c;">■</span> Solomon Islands |
| <span style="color: #e67e22;">■</span> Bermuda           | <span style="color: #e67e22;">■</span> Kiribati                        | <span style="color: #e74c3c;">■</span> Niue                  | <span style="color: #34495e;">■</span> Tokelau         |
| <span style="color: #e67e22;">■</span> Brunei Darussalam | <span style="color: #e67e22;">■</span> Maldives                        | <span style="color: #e67e22;">■</span> Palau                 | <span style="color: #e67e22;">■</span> Tonga           |
| <span style="color: #e67e22;">■</span> Cape Verde        | <span style="color: #e67e22;">■</span> Marshall Islands                | <span style="color: #e67e22;">■</span> Samoa                 | <span style="color: #e67e22;">■</span> Tuvalu          |
| <span style="color: #e67e22;">■</span> Comoros           | <span style="color: #e67e22;">■</span> Mauritius                       | <span style="color: #f1c40f;">■</span> Sao Tome and Principe | <span style="color: #e67e22;">■</span> Vanuatu         |
| <span style="color: #e74c3c;">■</span> Cook Islands      | <span style="color: #e67e22;">■</span> Mirconesia, Federated States of |                                                              |                                                        |

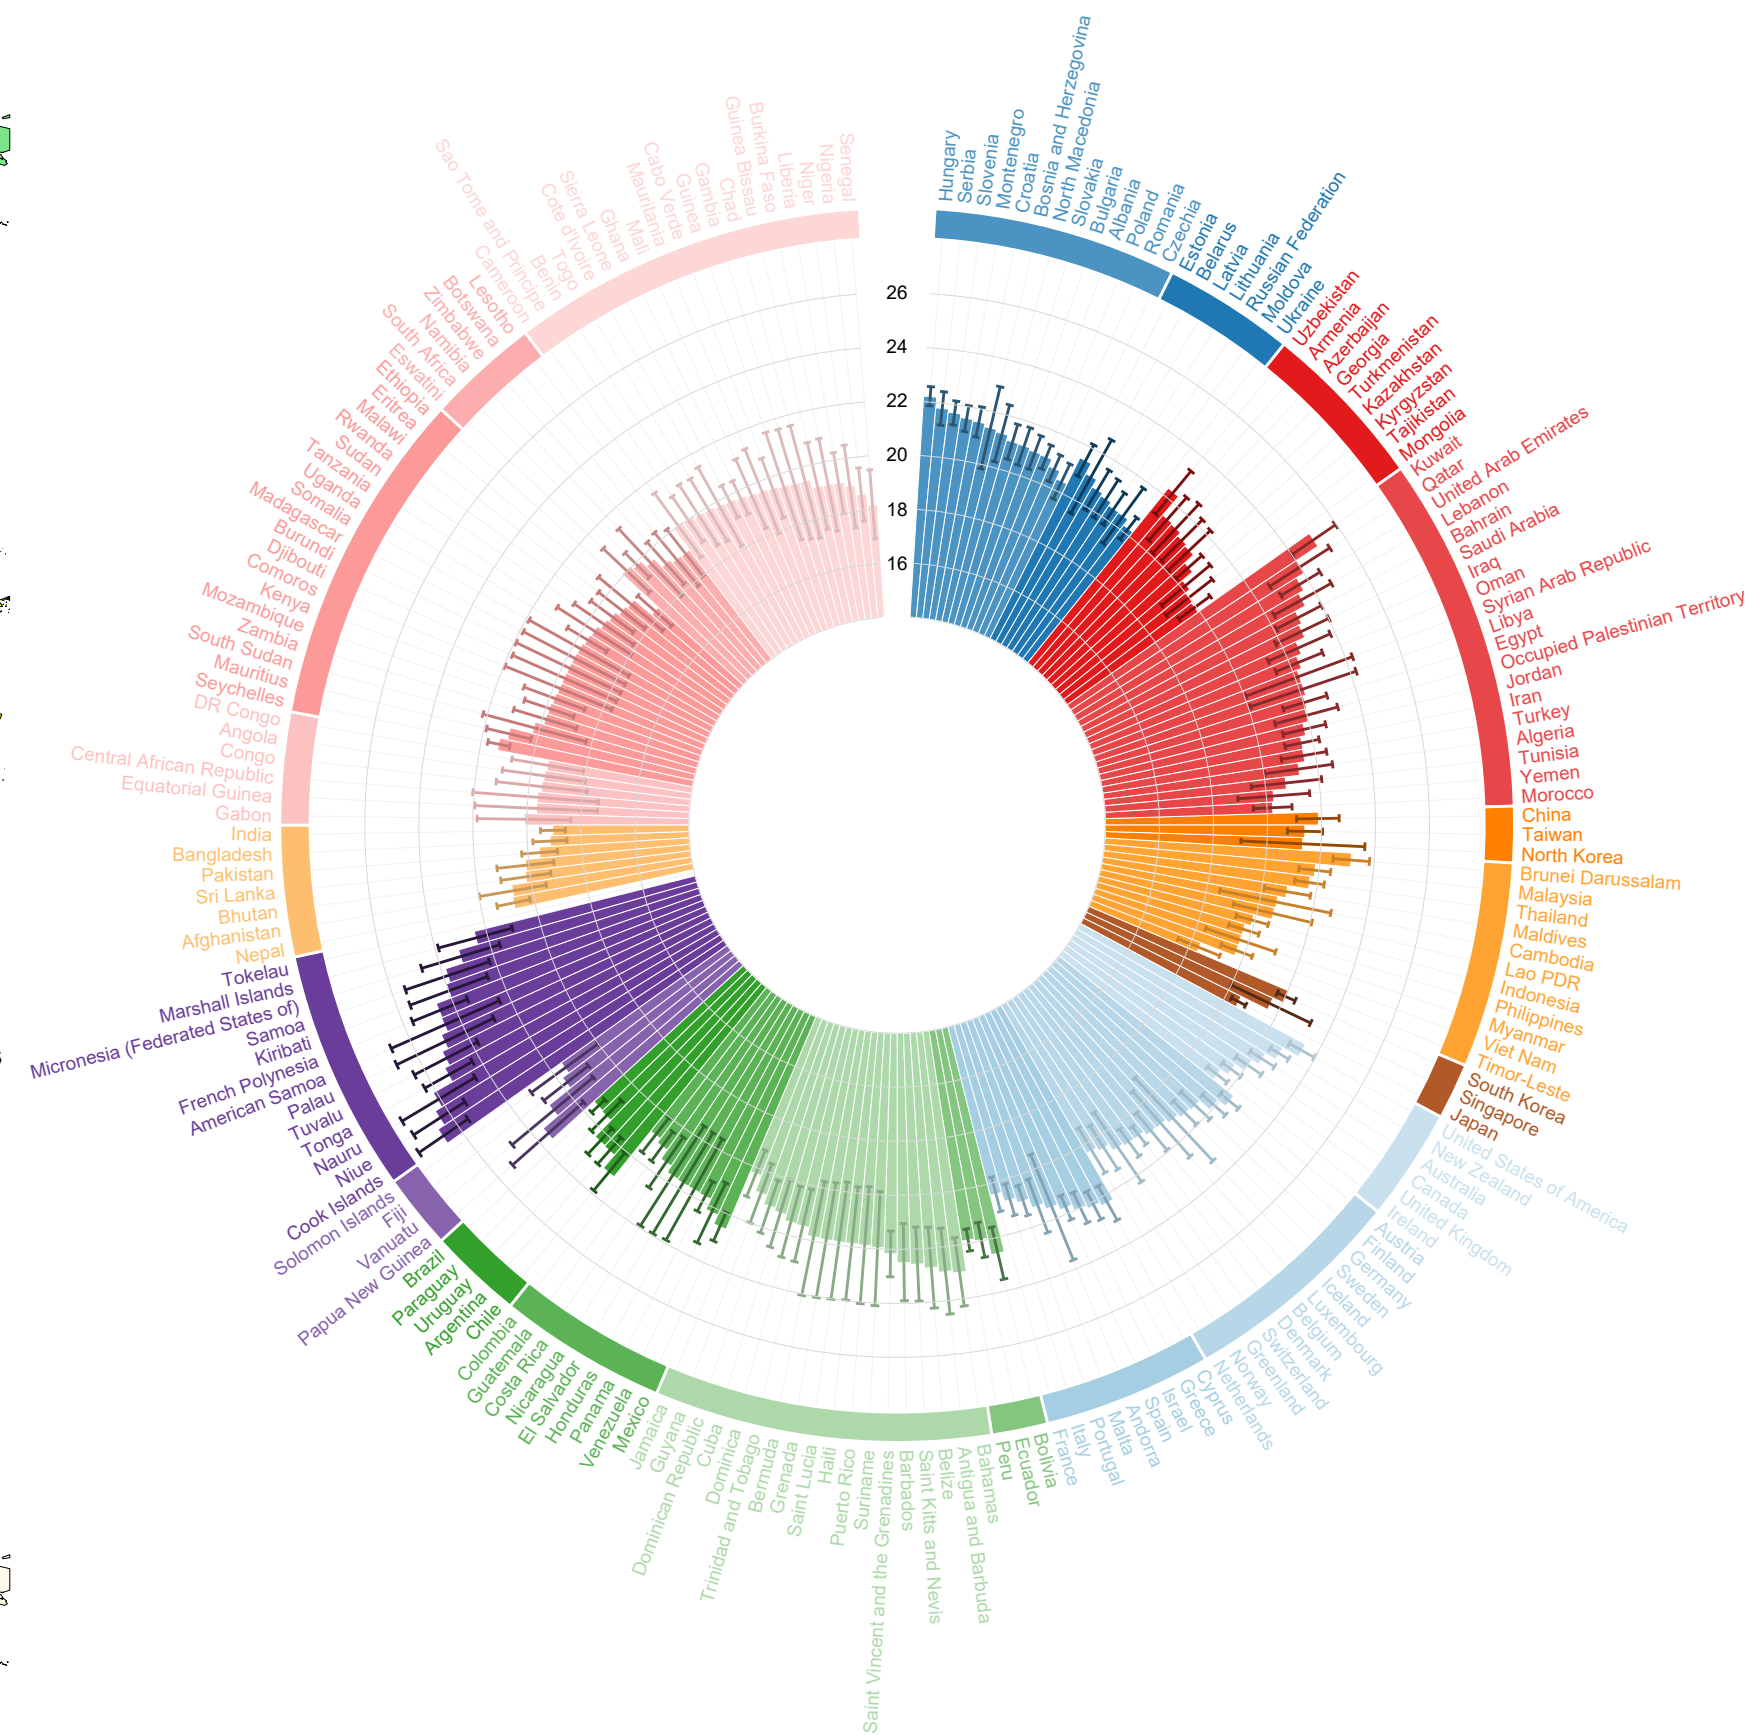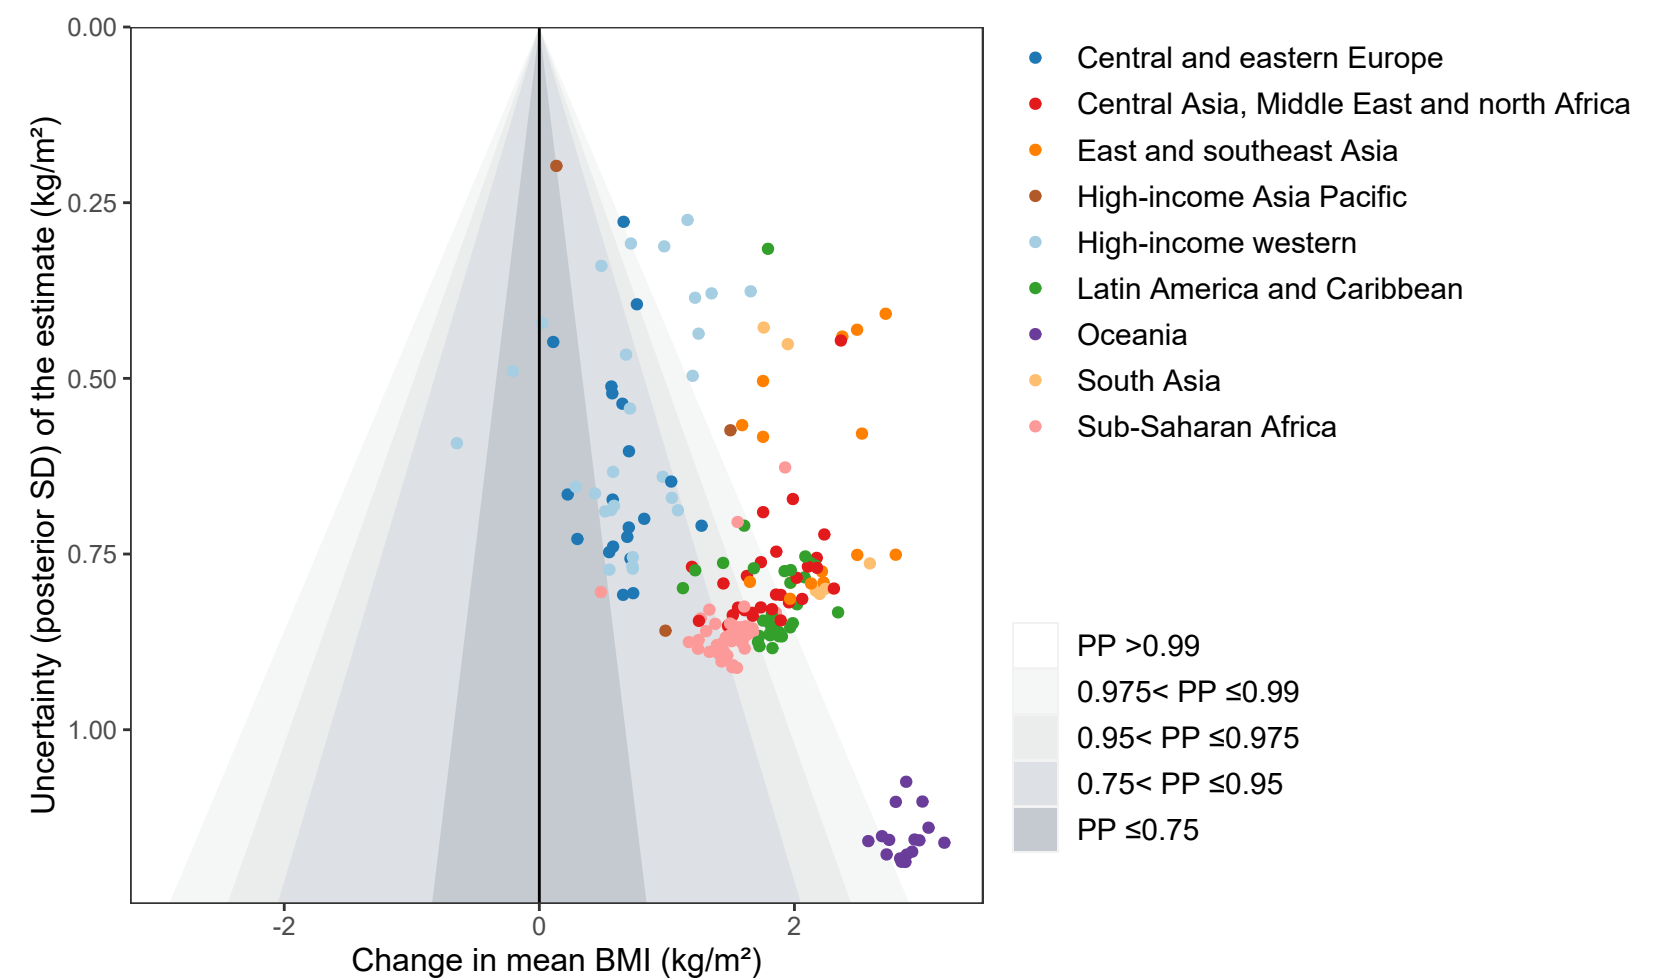

- Central and eastern Europe
- Central Asia, Middle East and north Africa
- East and southeast Asia
- High-income Asia Pacific
- High-income western
- Latin America and Caribbean
- Oceania
- South Asia
- Sub-Saharan Africa

- PP > 0.99
- 0.975 < PP ≤ 0.99
- 0.95 < PP ≤ 0.975
- 0.75 < PP ≤ 0.95
- PP ≤ 0.75



Mean BMI in 2020 (boys, age 15, rural)

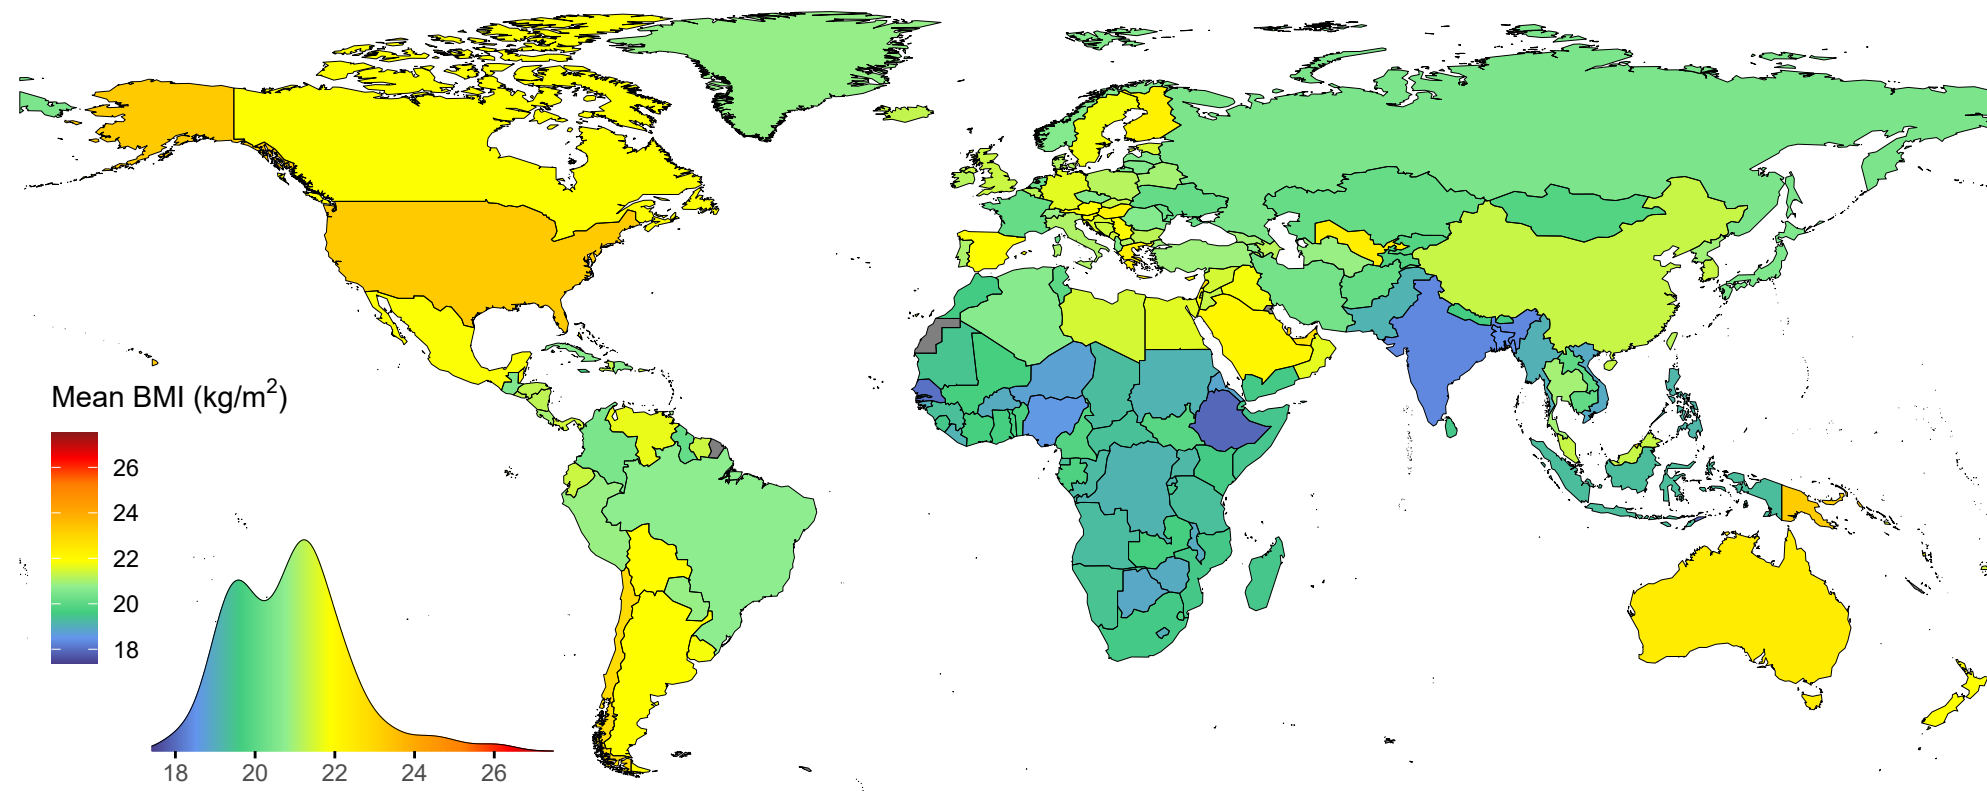

- |                                                          |                                                                        |                                                              |                                                        |
|----------------------------------------------------------|------------------------------------------------------------------------|--------------------------------------------------------------|--------------------------------------------------------|
| <span style="color: #e69d00;">■</span> American Samoa    | <span style="color: #c7e9c0;">■</span> Fiji                            | <span style="color: #c7e9c0;">■</span> Montenegro            | <span style="color: #c7e9c0;">■</span> Seychelles      |
| <span style="color: #ffff00;">■</span> Bahrain           | <span style="color: #e69d00;">■</span> French Polynesia                | <span style="color: #808080;">■</span> Nauru                 | <span style="color: #c7e9c0;">■</span> Solomon Islands |
| <span style="color: #808080;">■</span> Bermuda           | <span style="color: #e69d00;">■</span> Kiribati                        | <span style="color: #ff0000;">■</span> Niue                  | <span style="color: #e69d00;">■</span> Tokelau         |
| <span style="color: #ffff00;">■</span> Brunei Darussalam | <span style="color: #c7e9c0;">■</span> Maldives                        | <span style="color: #e69d00;">■</span> Palau                 | <span style="color: #e69d00;">■</span> Tonga           |
| <span style="color: #4db6ac;">■</span> Cape Verde        | <span style="color: #ffff00;">■</span> Marshall Islands                | <span style="color: #ffff00;">■</span> Samoa                 | <span style="color: #e69d00;">■</span> Tuvalu          |
| <span style="color: #4db6ac;">■</span> Comoros           | <span style="color: #c7e9c0;">■</span> Mauritius                       | <span style="color: #4db6ac;">■</span> Sao Tome and Principe | <span style="color: #ffff00;">■</span> Vanuatu         |
| <span style="color: #ff0000;">■</span> Cook Islands      | <span style="color: #ffff00;">■</span> Mirconesia, Federated States of |                                                              |                                                        |

Change 1990-2020 (boys, age 15, rural)



- |                                                          |                                                                        |                                                              |                                                        |
|----------------------------------------------------------|------------------------------------------------------------------------|--------------------------------------------------------------|--------------------------------------------------------|
| <span style="color: #ff0000;">■</span> American Samoa    | <span style="color: #ff0000;">■</span> Fiji                            | <span style="color: #ffff00;">■</span> Montenegro            | <span style="color: #e69d00;">■</span> Seychelles      |
| <span style="color: #e69d00;">■</span> Bahrain           | <span style="color: #ff0000;">■</span> French Polynesia                | <span style="color: #808080;">■</span> Nauru                 | <span style="color: #ff0000;">■</span> Solomon Islands |
| <span style="color: #808080;">■</span> Bermuda           | <span style="color: #ff0000;">■</span> Kiribati                        | <span style="color: #ff0000;">■</span> Niue                  | <span style="color: #ff0000;">■</span> Tokelau         |
| <span style="color: #e69d00;">■</span> Brunei Darussalam | <span style="color: #ff0000;">■</span> Maldives                        | <span style="color: #e69d00;">■</span> Palau                 | <span style="color: #ff0000;">■</span> Tonga           |
| <span style="color: #e69d00;">■</span> Cape Verde        | <span style="color: #ff0000;">■</span> Marshall Islands                | <span style="color: #e69d00;">■</span> Samoa                 | <span style="color: #ff0000;">■</span> Tuvalu          |
| <span style="color: #e69d00;">■</span> Comoros           | <span style="color: #ff0000;">■</span> Mauritius                       | <span style="color: #ffff00;">■</span> Sao Tome and Principe | <span style="color: #ff0000;">■</span> Vanuatu         |
| <span style="color: #ff0000;">■</span> Cook Islands      | <span style="color: #ff0000;">■</span> Mirconesia, Federated States of |                                                              |                                                        |

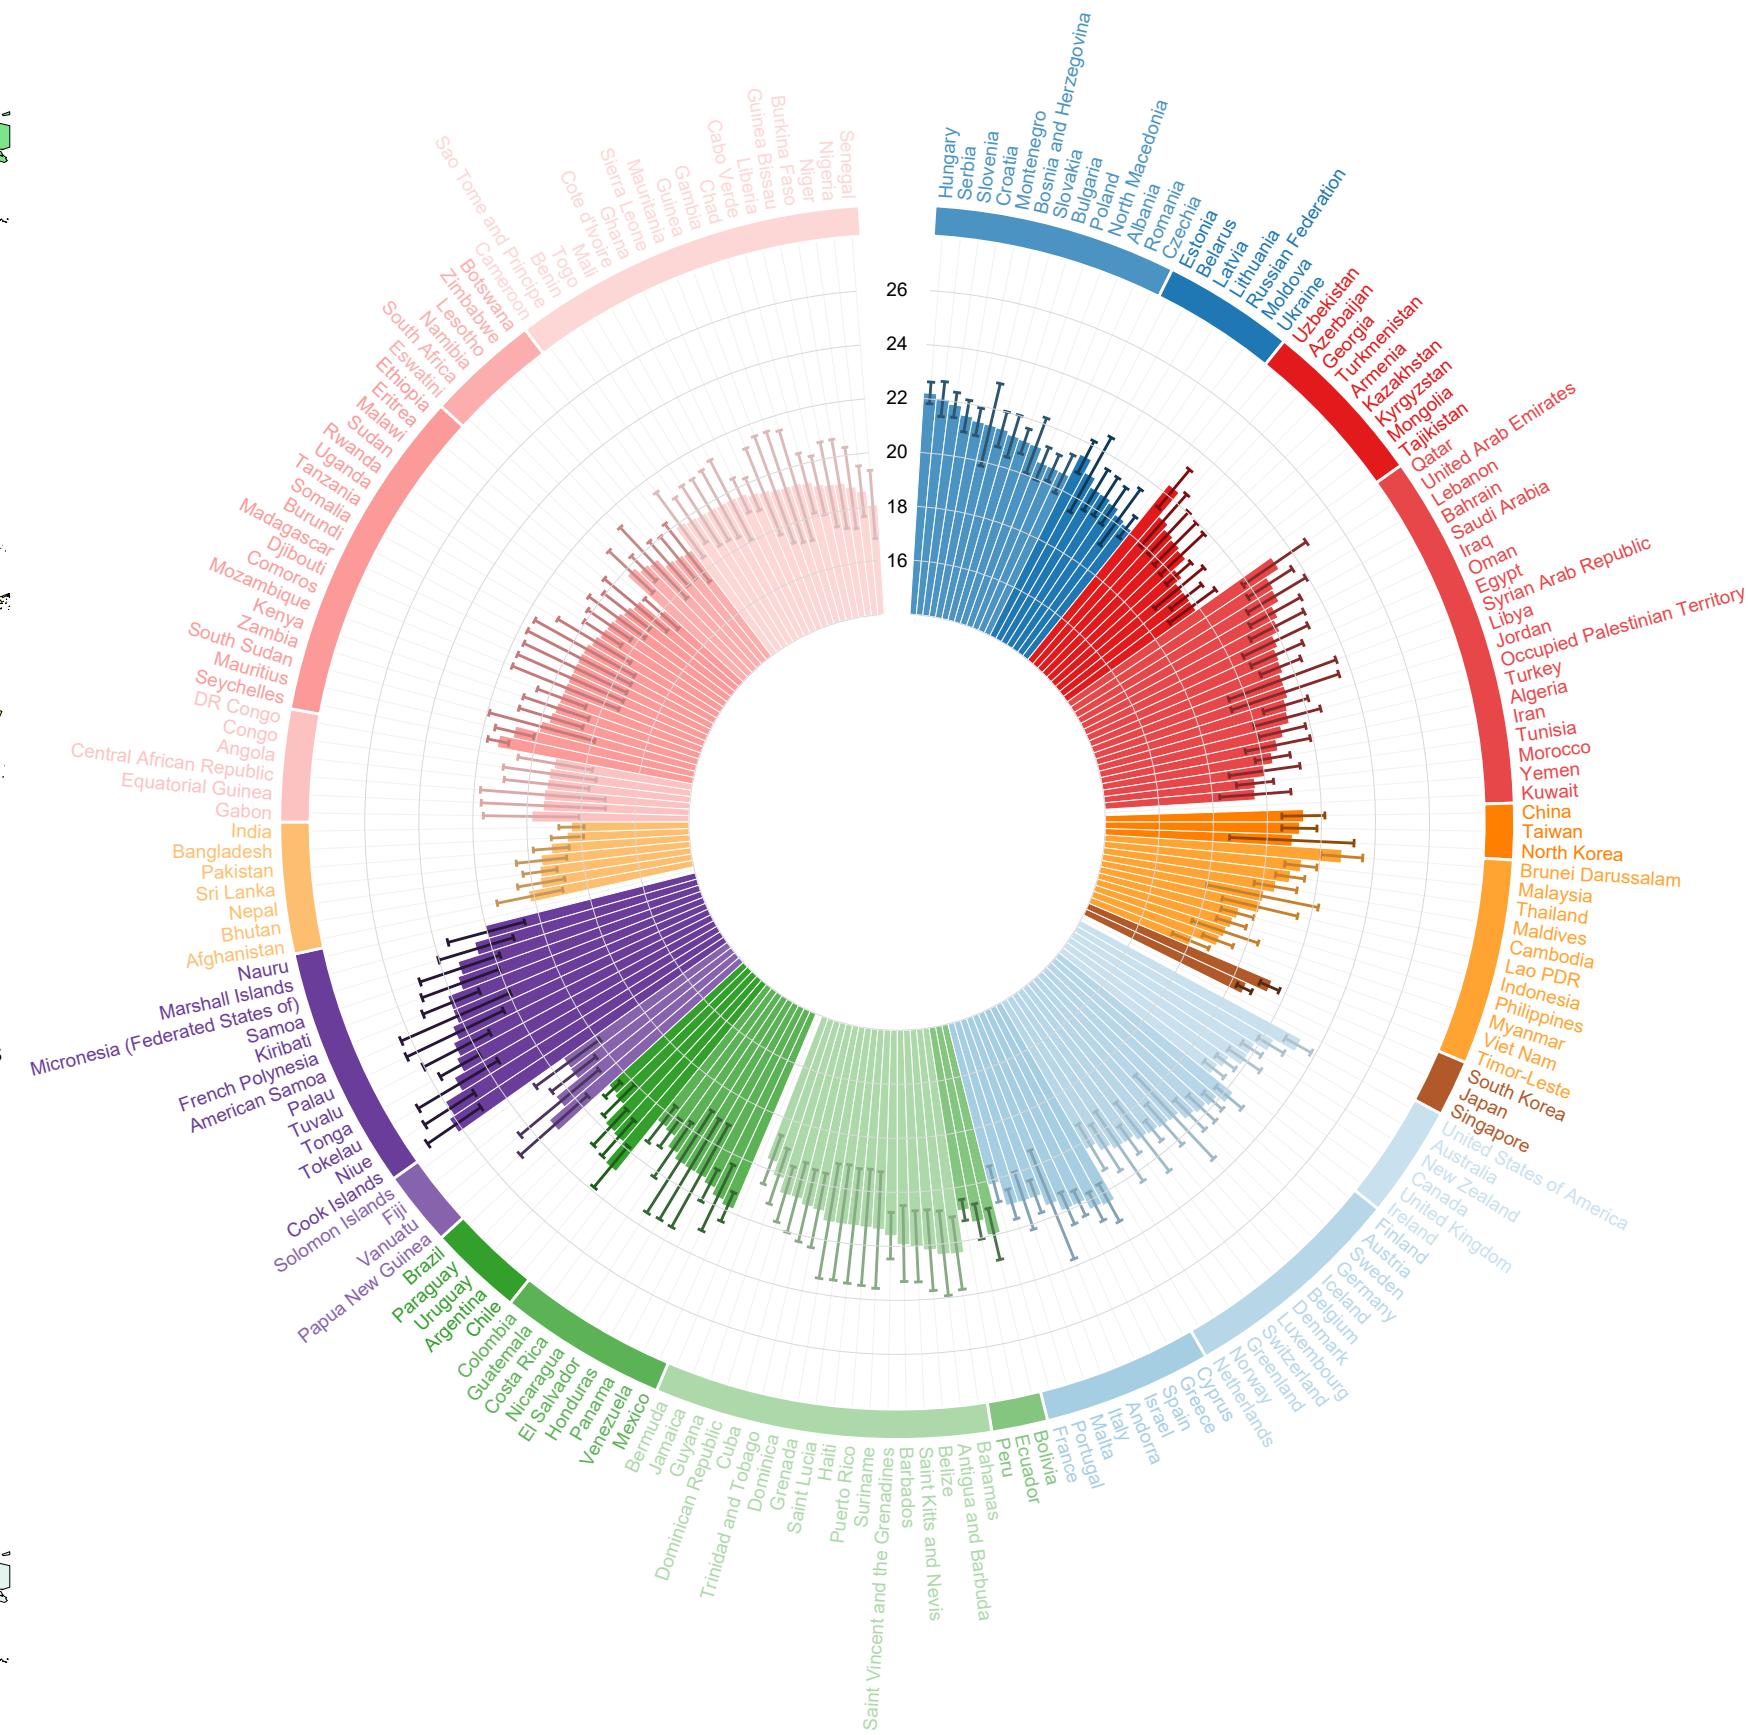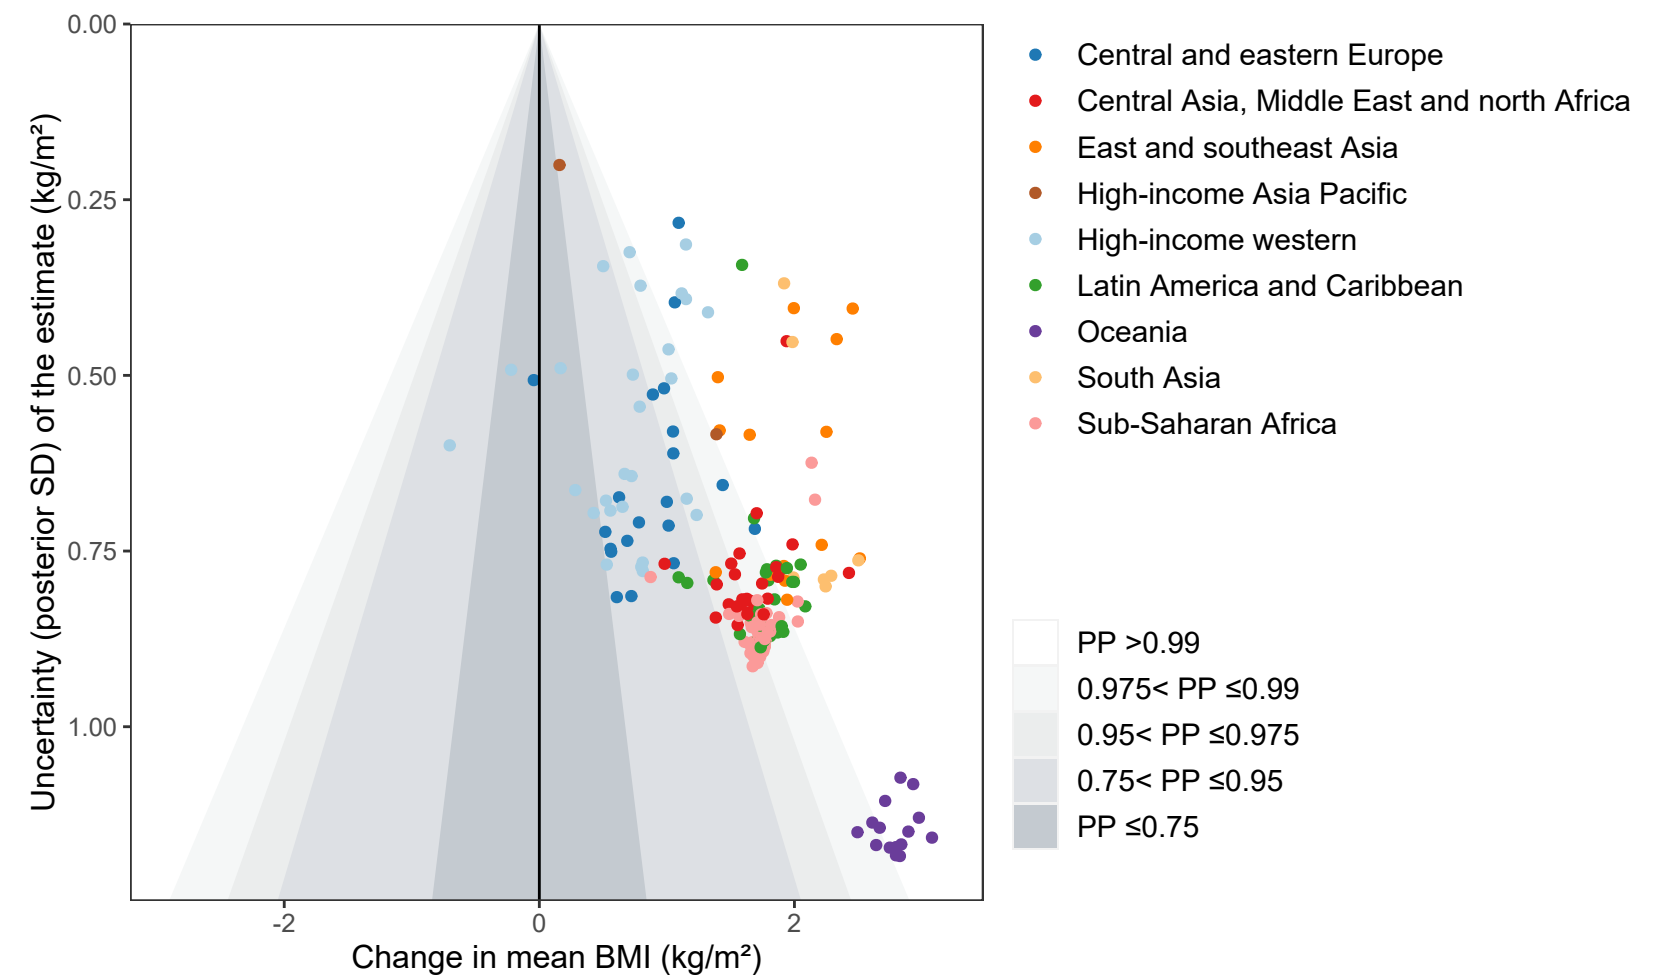



Mean BMI in 2020 (girls, age 19, urban)

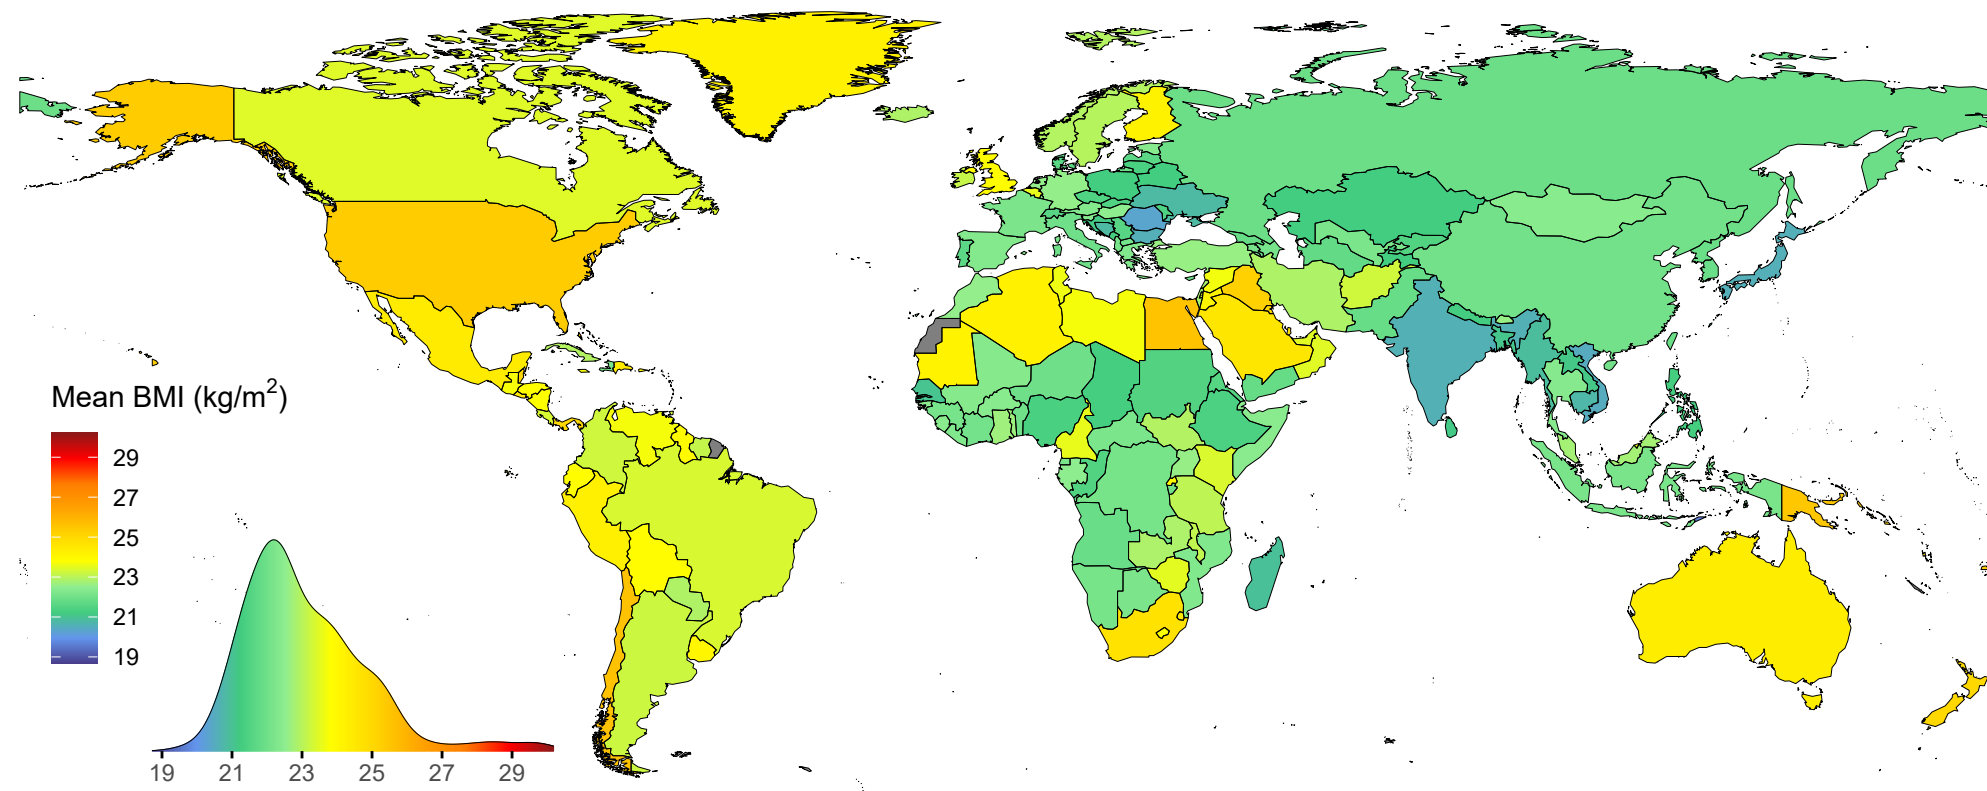

- |                                                          |                                                                        |                                                              |                                                        |
|----------------------------------------------------------|------------------------------------------------------------------------|--------------------------------------------------------------|--------------------------------------------------------|
| <span style="color: #e67e22;">■</span> American Samoa    | <span style="color: #f1c40f;">■</span> Fiji                            | <span style="color: #27ae60;">■</span> Montenegro            | <span style="color: #27ae60;">■</span> Seychelles      |
| <span style="color: #f1c40f;">■</span> Bahrain           | <span style="color: #e67e22;">■</span> French Polynesia                | <span style="color: #c0392b;">■</span> Nauru                 | <span style="color: #f1c40f;">■</span> Solomon Islands |
| <span style="color: #f1c40f;">■</span> Bermuda           | <span style="color: #e67e22;">■</span> Kiribati                        | <span style="color: #c0392b;">■</span> Niue                  | <span style="color: #808080;">■</span> Tokelau         |
| <span style="color: #f1c40f;">■</span> Brunei Darussalam | <span style="color: #27ae60;">■</span> Maldives                        | <span style="color: #f1c40f;">■</span> Palau                 | <span style="color: #c0392b;">■</span> Tonga           |
| <span style="color: #27ae60;">■</span> Cape Verde        | <span style="color: #f1c40f;">■</span> Marshall Islands                | <span style="color: #c0392b;">■</span> Samoa                 | <span style="color: #e67e22;">■</span> Tuvalu          |
| <span style="color: #27ae60;">■</span> Comoros           | <span style="color: #27ae60;">■</span> Mauritius                       | <span style="color: #27ae60;">■</span> Sao Tome and Principe | <span style="color: #f1c40f;">■</span> Vanuatu         |
| <span style="color: #c0392b;">■</span> Cook Islands      | <span style="color: #e67e22;">■</span> Mirconesia, Federated States of |                                                              |                                                        |

Change 1990-2020 (girls, age 19, urban)



- |                                                          |                                                                        |                                                              |                                                        |
|----------------------------------------------------------|------------------------------------------------------------------------|--------------------------------------------------------------|--------------------------------------------------------|
| <span style="color: #f1c40f;">■</span> American Samoa    | <span style="color: #f1c40f;">■</span> Fiji                            | <span style="color: #f1c40f;">■</span> Montenegro            | <span style="color: #f1c40f;">■</span> Seychelles      |
| <span style="color: #f1c40f;">■</span> Bahrain           | <span style="color: #f1c40f;">■</span> French Polynesia                | <span style="color: #f1c40f;">■</span> Nauru                 | <span style="color: #f1c40f;">■</span> Solomon Islands |
| <span style="color: #f1c40f;">■</span> Bermuda           | <span style="color: #f1c40f;">■</span> Kiribati                        | <span style="color: #c0392b;">■</span> Niue                  | <span style="color: #808080;">■</span> Tokelau         |
| <span style="color: #f1c40f;">■</span> Brunei Darussalam | <span style="color: #f1c40f;">■</span> Maldives                        | <span style="color: #f1c40f;">■</span> Palau                 | <span style="color: #c0392b;">■</span> Tonga           |
| <span style="color: #f1c40f;">■</span> Cape Verde        | <span style="color: #f1c40f;">■</span> Marshall Islands                | <span style="color: #f1c40f;">■</span> Samoa                 | <span style="color: #f1c40f;">■</span> Tuvalu          |
| <span style="color: #f1c40f;">■</span> Comoros           | <span style="color: #f1c40f;">■</span> Mauritius                       | <span style="color: #f1c40f;">■</span> Sao Tome and Principe | <span style="color: #f1c40f;">■</span> Vanuatu         |
| <span style="color: #f1c40f;">■</span> Cook Islands      | <span style="color: #f1c40f;">■</span> Mirconesia, Federated States of |                                                              |                                                        |

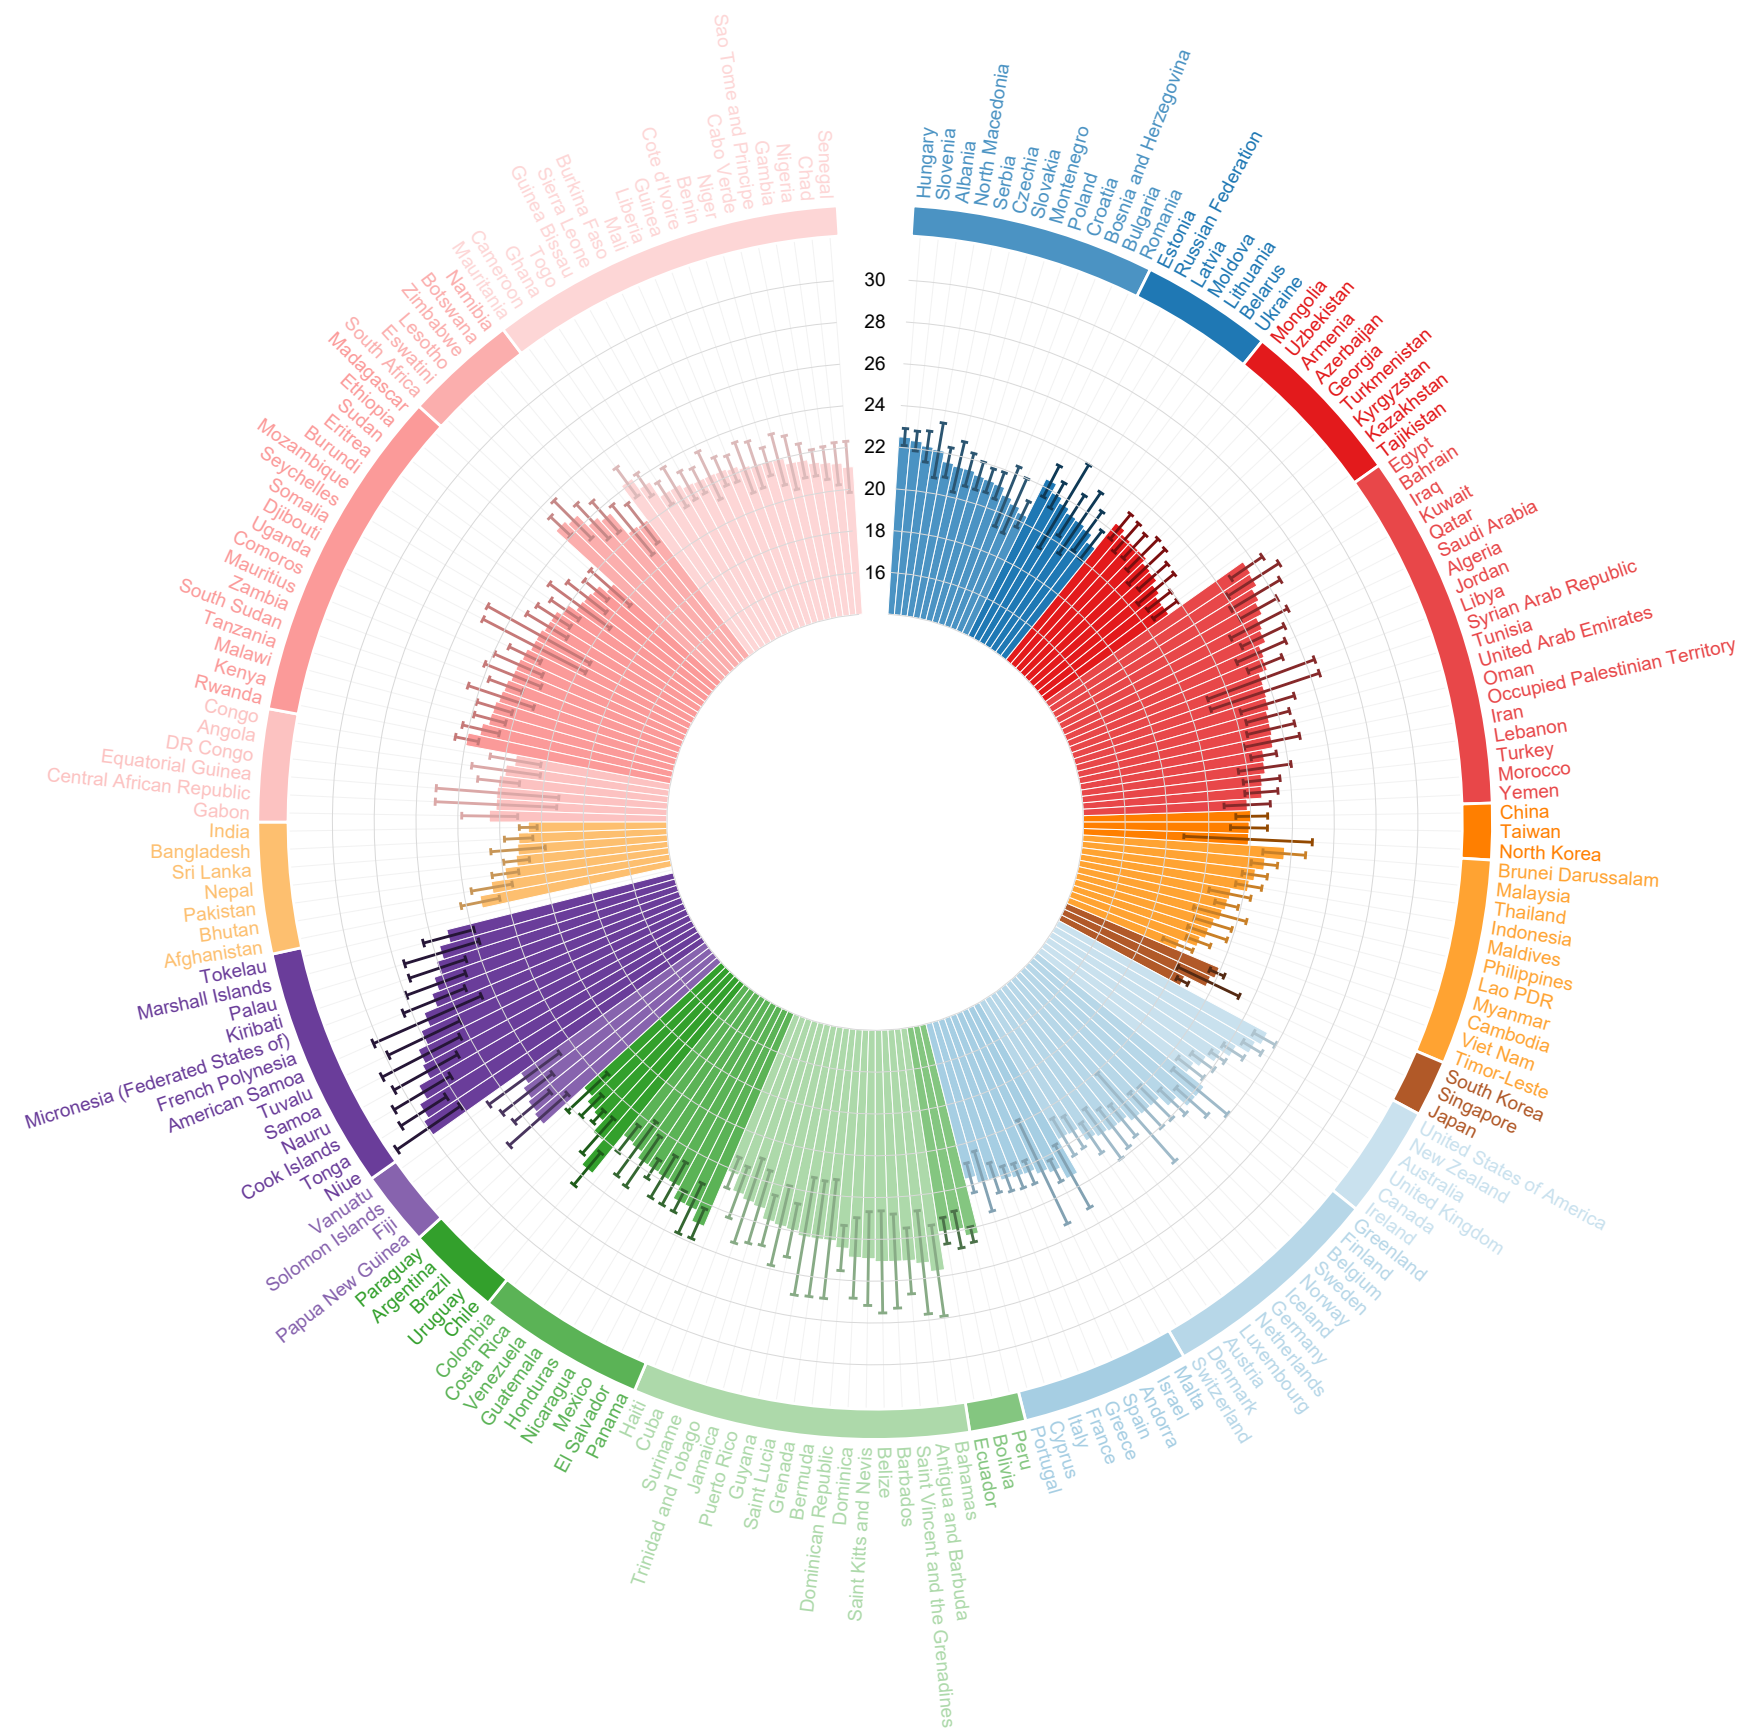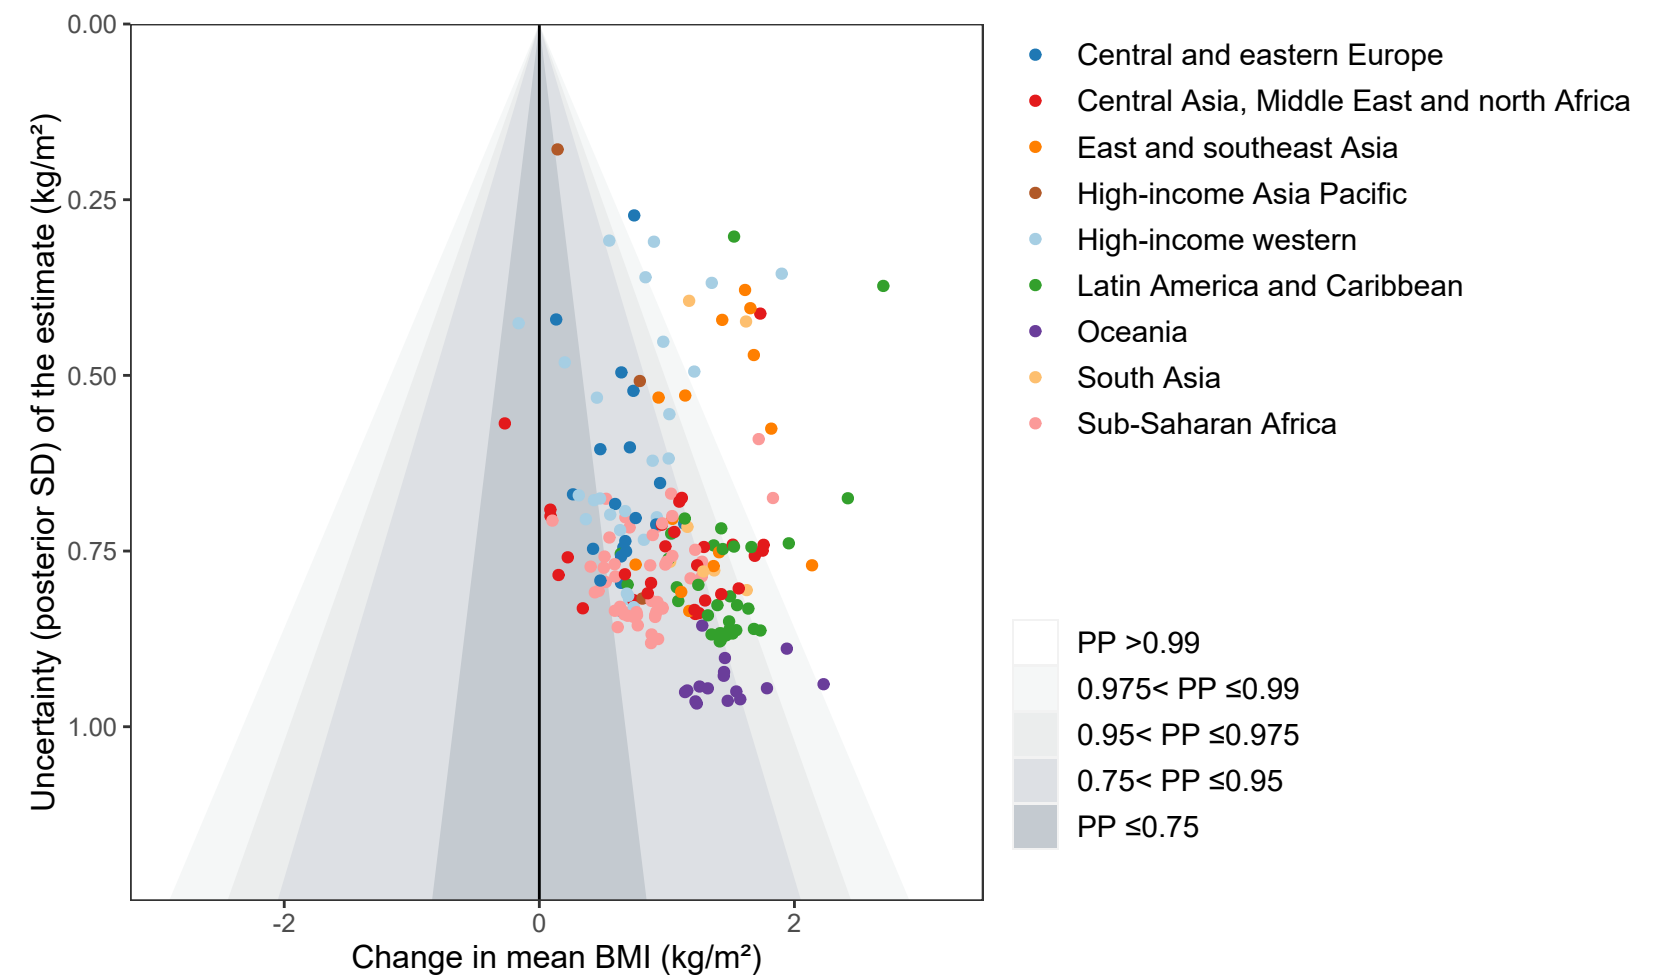



Mean BMI in 2020 (girls, age 19, rural)

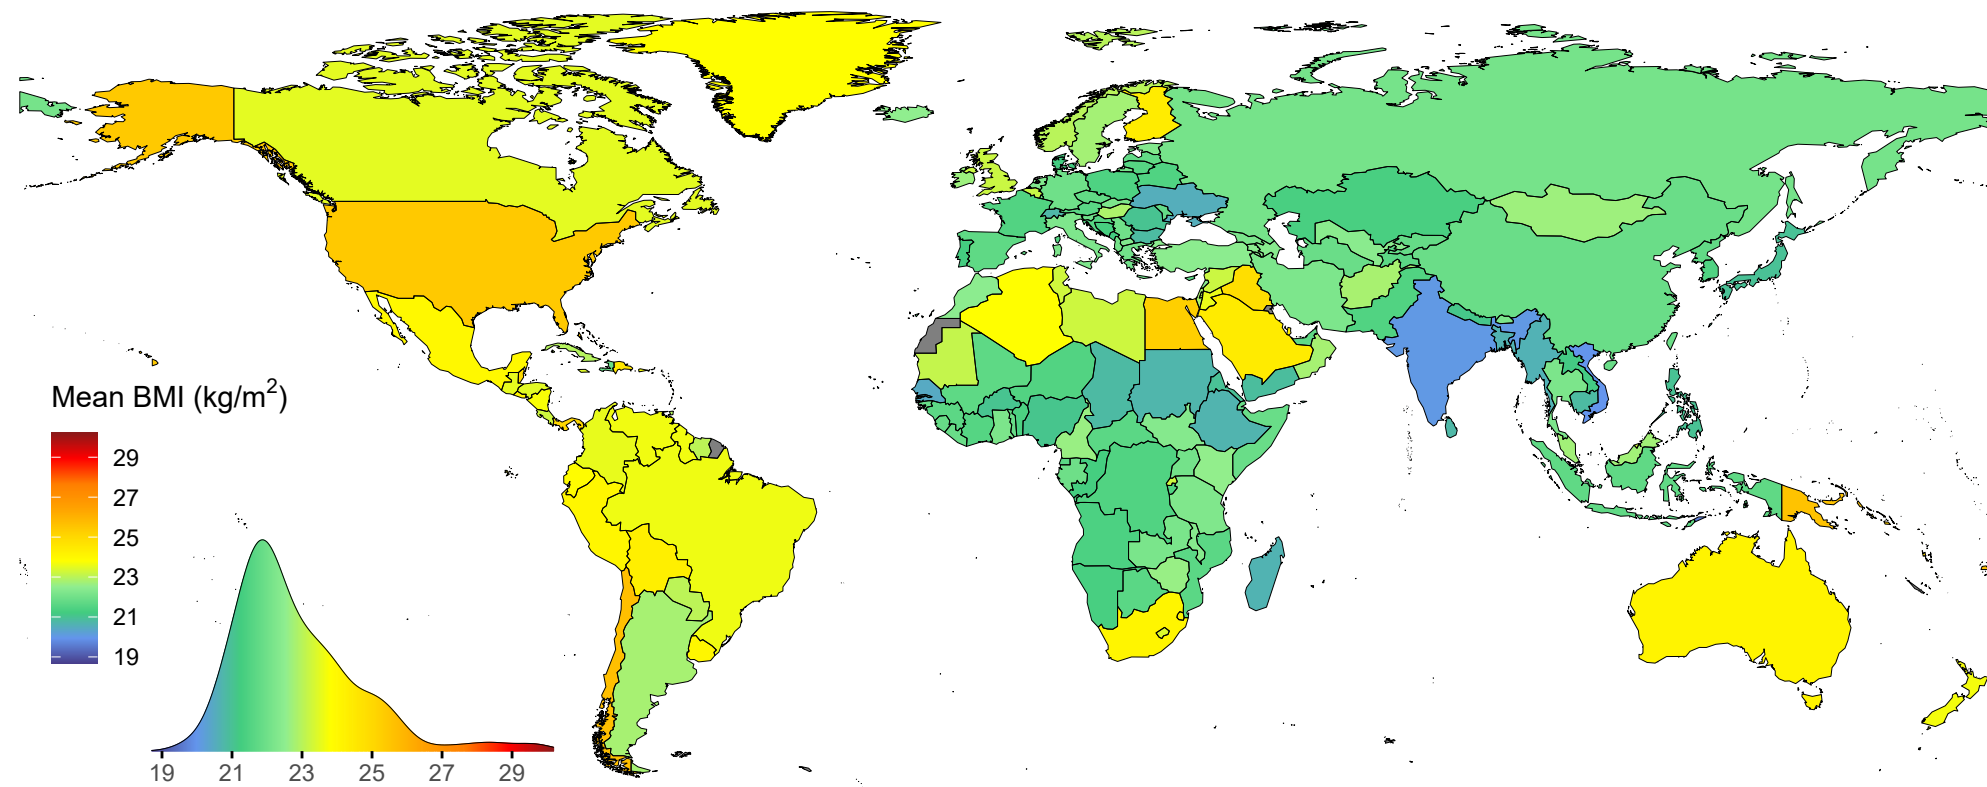

- |                                                          |                                                                        |                                                              |                                                        |
|----------------------------------------------------------|------------------------------------------------------------------------|--------------------------------------------------------------|--------------------------------------------------------|
| <span style="color: #e67e22;">■</span> American Samoa    | <span style="color: #f1c40f;">■</span> Fiji                            | <span style="color: #27ae60;">■</span> Montenegro            | <span style="color: #2ecc71;">■</span> Seychelles      |
| <span style="color: #f1c40f;">■</span> Bahrain           | <span style="color: #e67e22;">■</span> French Polynesia                | <span style="color: #34495e;">■</span> Nauru                 | <span style="color: #f1c40f;">■</span> Solomon Islands |
| <span style="color: #34495e;">■</span> Bermuda           | <span style="color: #f1c40f;">■</span> Kiribati                        | <span style="color: #8e44ad;">■</span> Niue                  | <span style="color: #e67e22;">■</span> Tokelau         |
| <span style="color: #2ecc71;">■</span> Brunei Darussalam | <span style="color: #2ecc71;">■</span> Maldives                        | <span style="color: #f1c40f;">■</span> Palau                 | <span style="color: #8e44ad;">■</span> Tonga           |
| <span style="color: #2ecc71;">■</span> Cape Verde        | <span style="color: #f1c40f;">■</span> Marshall Islands                | <span style="color: #e67e22;">■</span> Samoa                 | <span style="color: #e67e22;">■</span> Tuvalu          |
| <span style="color: #2ecc71;">■</span> Comoros           | <span style="color: #2ecc71;">■</span> Mauritius                       | <span style="color: #2ecc71;">■</span> Sao Tome and Principe | <span style="color: #f1c40f;">■</span> Vanuatu         |
| <span style="color: #e67e22;">■</span> Cook Islands      | <span style="color: #e67e22;">■</span> Mirconesia, Federated States of |                                                              |                                                        |

Change 1990-2020 (girls, age 19, rural)

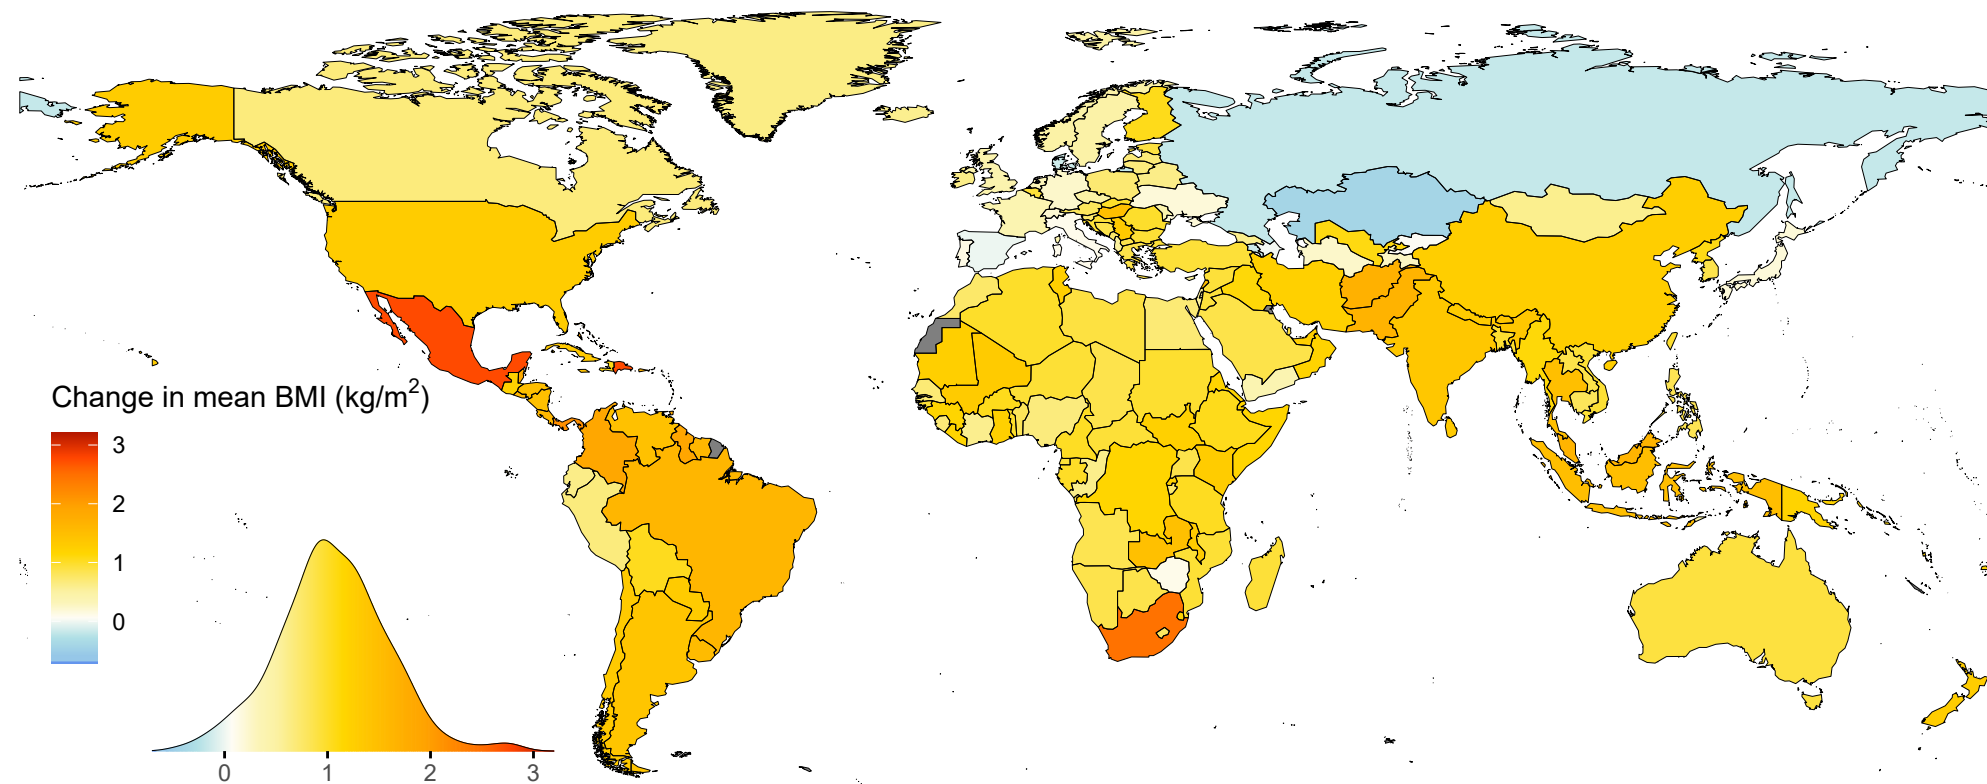

- |                                                          |                                                                        |                                                              |                                                        |
|----------------------------------------------------------|------------------------------------------------------------------------|--------------------------------------------------------------|--------------------------------------------------------|
| <span style="color: #f1c40f;">■</span> American Samoa    | <span style="color: #f1c40f;">■</span> Fiji                            | <span style="color: #f1c40f;">■</span> Montenegro            | <span style="color: #e67e22;">■</span> Seychelles      |
| <span style="color: #f1c40f;">■</span> Bahrain           | <span style="color: #f1c40f;">■</span> French Polynesia                | <span style="color: #34495e;">■</span> Nauru                 | <span style="color: #f1c40f;">■</span> Solomon Islands |
| <span style="color: #34495e;">■</span> Bermuda           | <span style="color: #f1c40f;">■</span> Kiribati                        | <span style="color: #8e44ad;">■</span> Niue                  | <span style="color: #f1c40f;">■</span> Tokelau         |
| <span style="color: #f1c40f;">■</span> Brunei Darussalam | <span style="color: #f1c40f;">■</span> Maldives                        | <span style="color: #f1c40f;">■</span> Palau                 | <span style="color: #f1c40f;">■</span> Tonga           |
| <span style="color: #f1c40f;">■</span> Cape Verde        | <span style="color: #f1c40f;">■</span> Marshall Islands                | <span style="color: #f1c40f;">■</span> Samoa                 | <span style="color: #f1c40f;">■</span> Tuvalu          |
| <span style="color: #f1c40f;">■</span> Comoros           | <span style="color: #f1c40f;">■</span> Mauritius                       | <span style="color: #f1c40f;">■</span> Sao Tome and Principe | <span style="color: #f1c40f;">■</span> Vanuatu         |
| <span style="color: #e67e22;">■</span> Cook Islands      | <span style="color: #f1c40f;">■</span> Mirconesia, Federated States of |                                                              |                                                        |

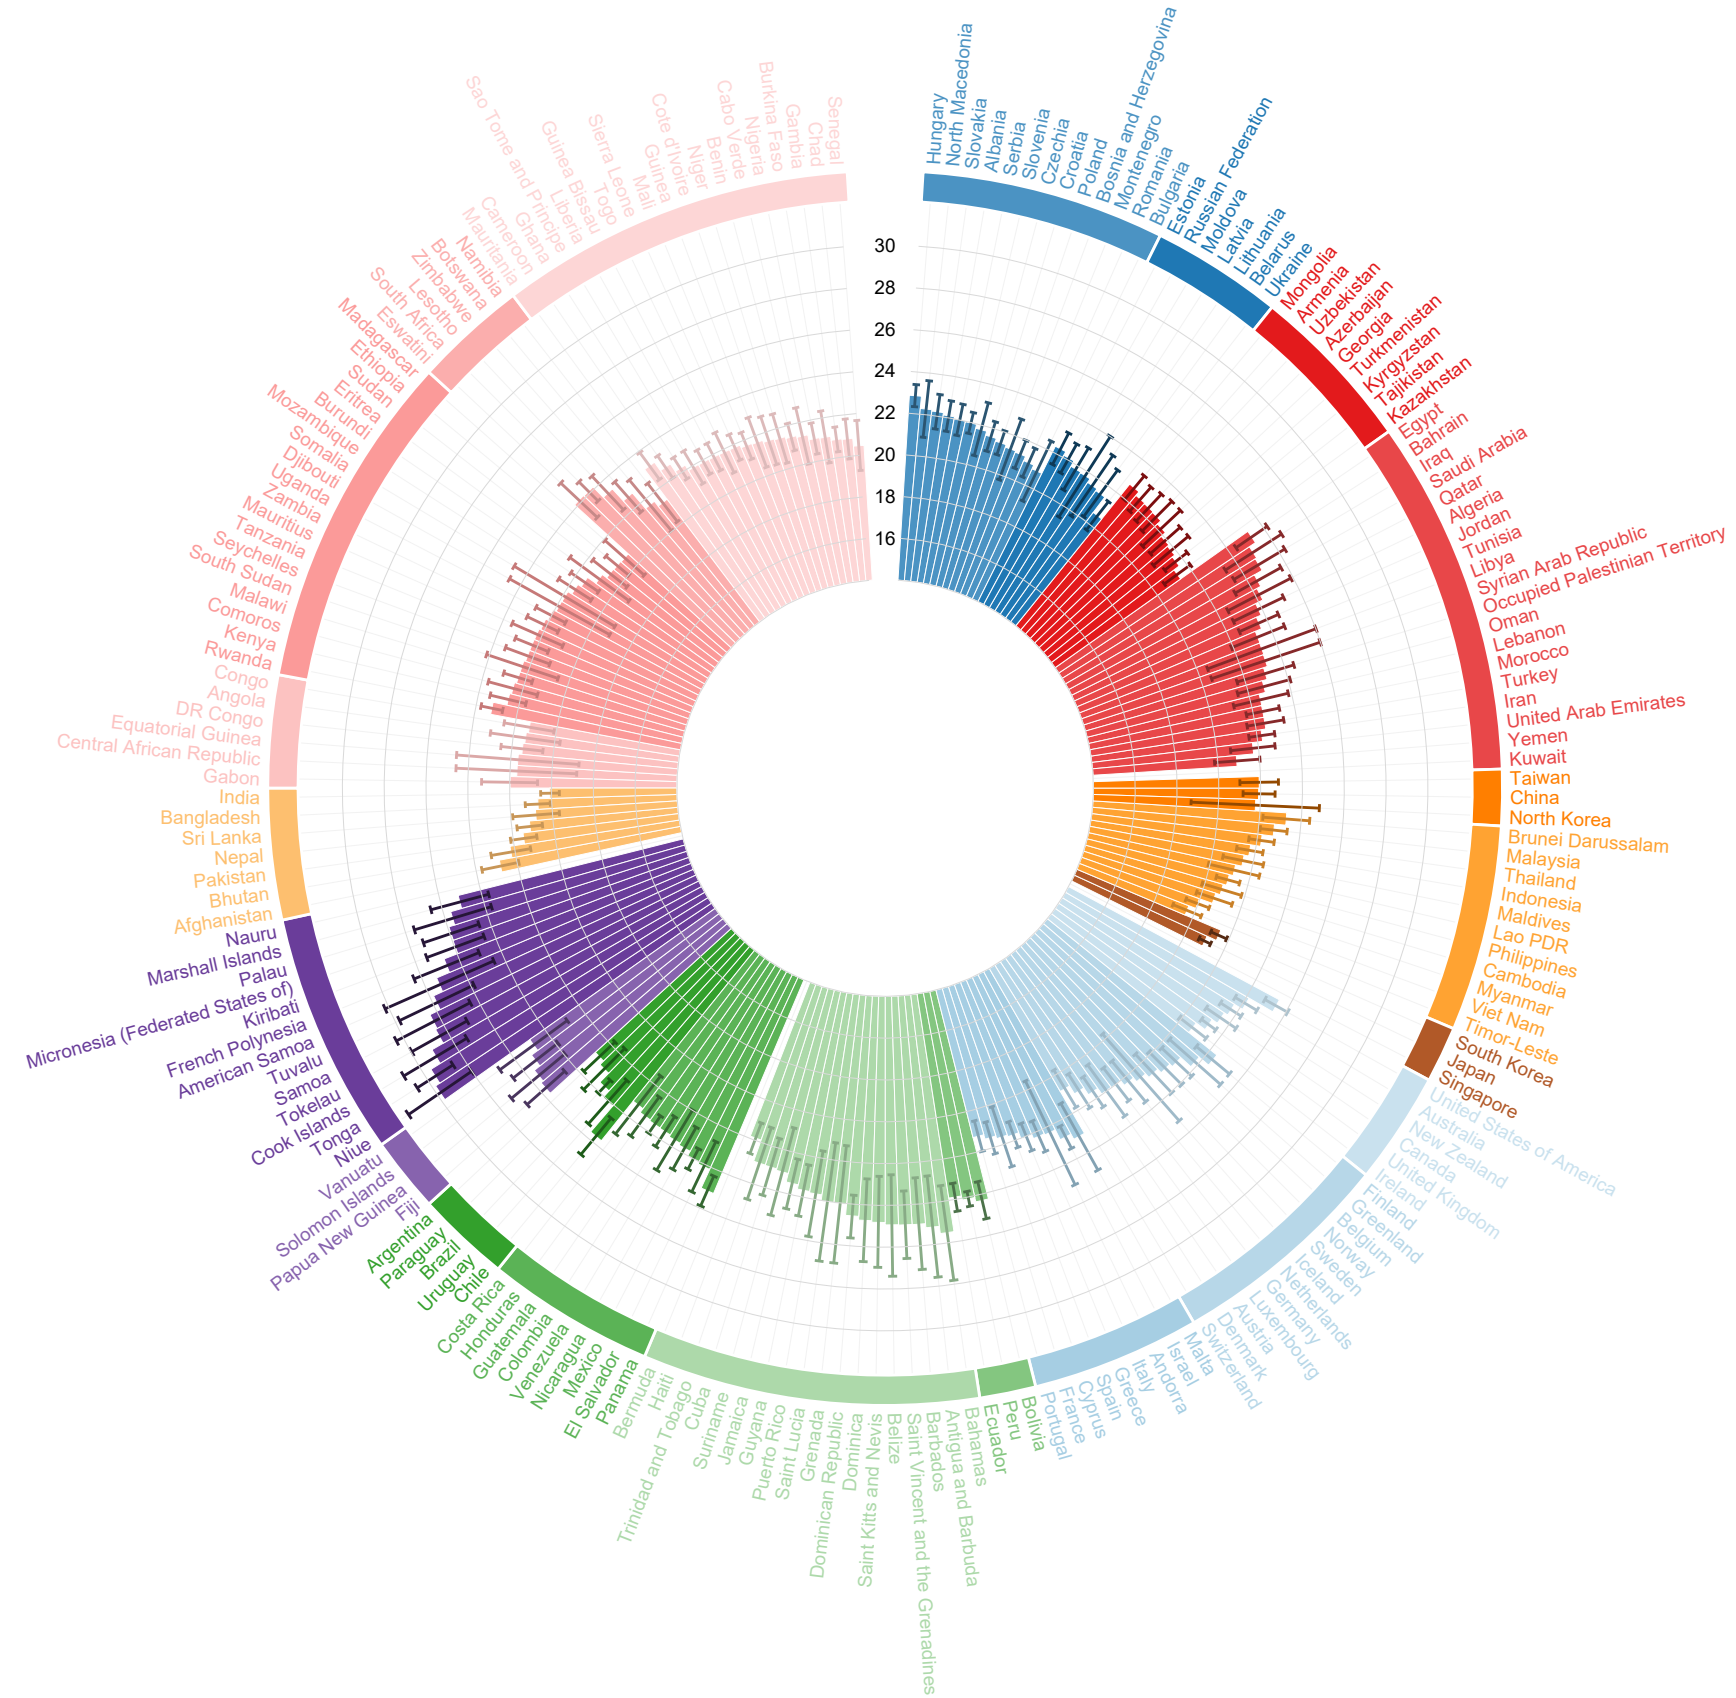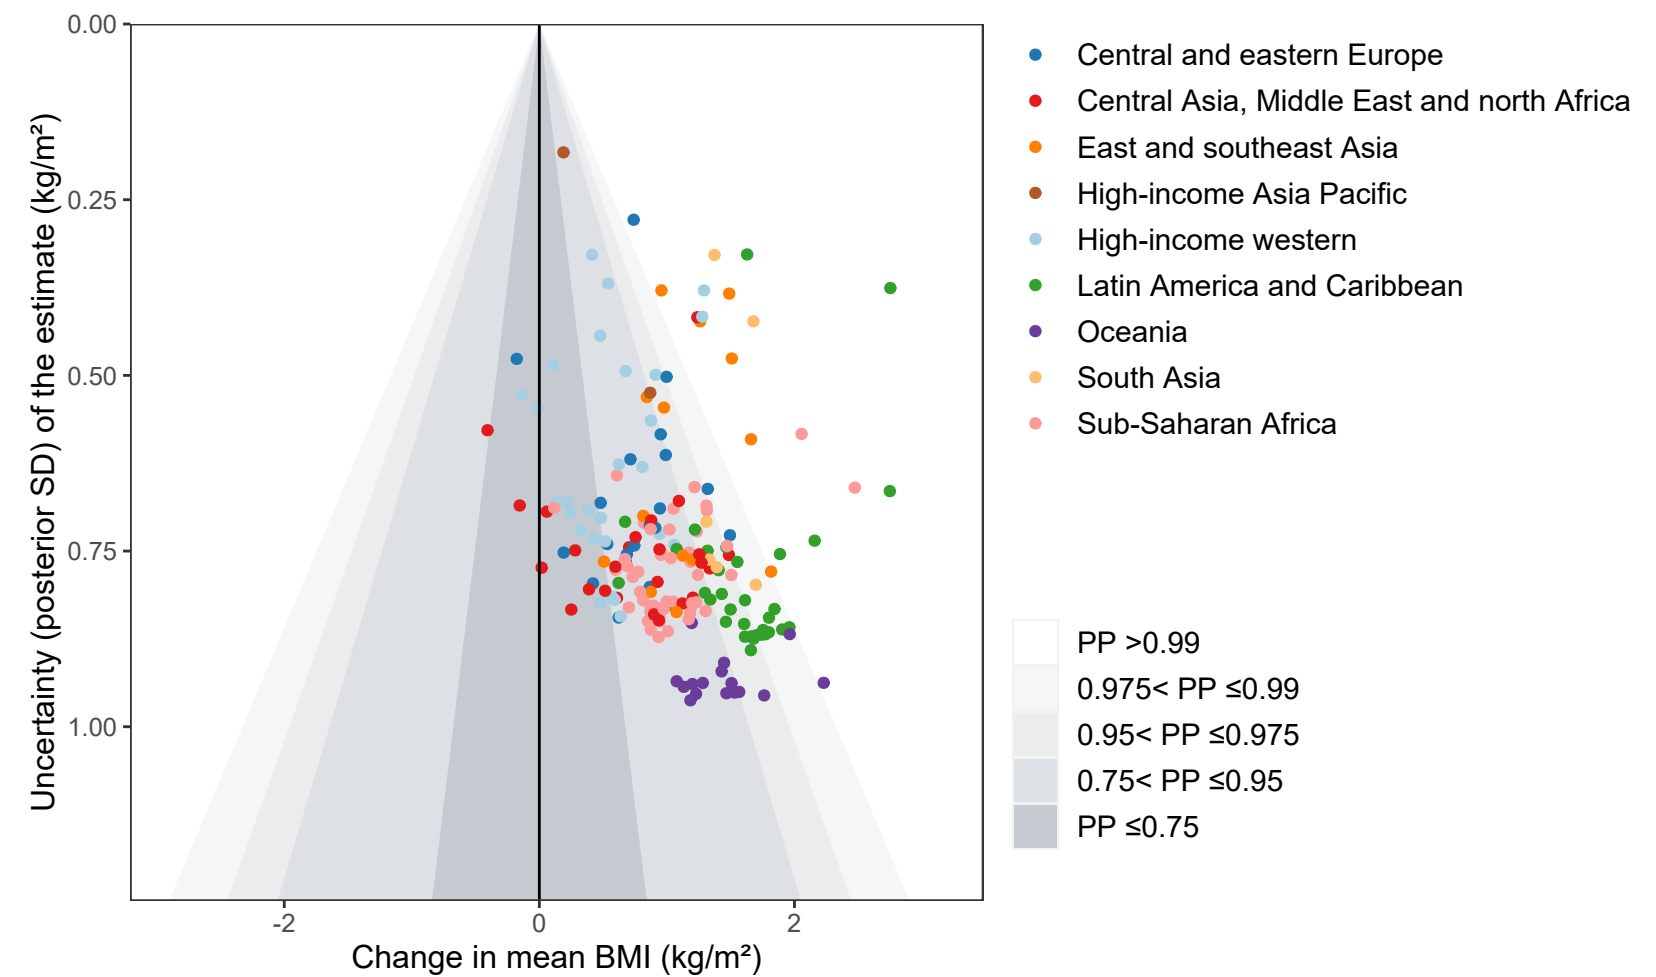



Mean BMI in 2020 (boys, age 19, urban)

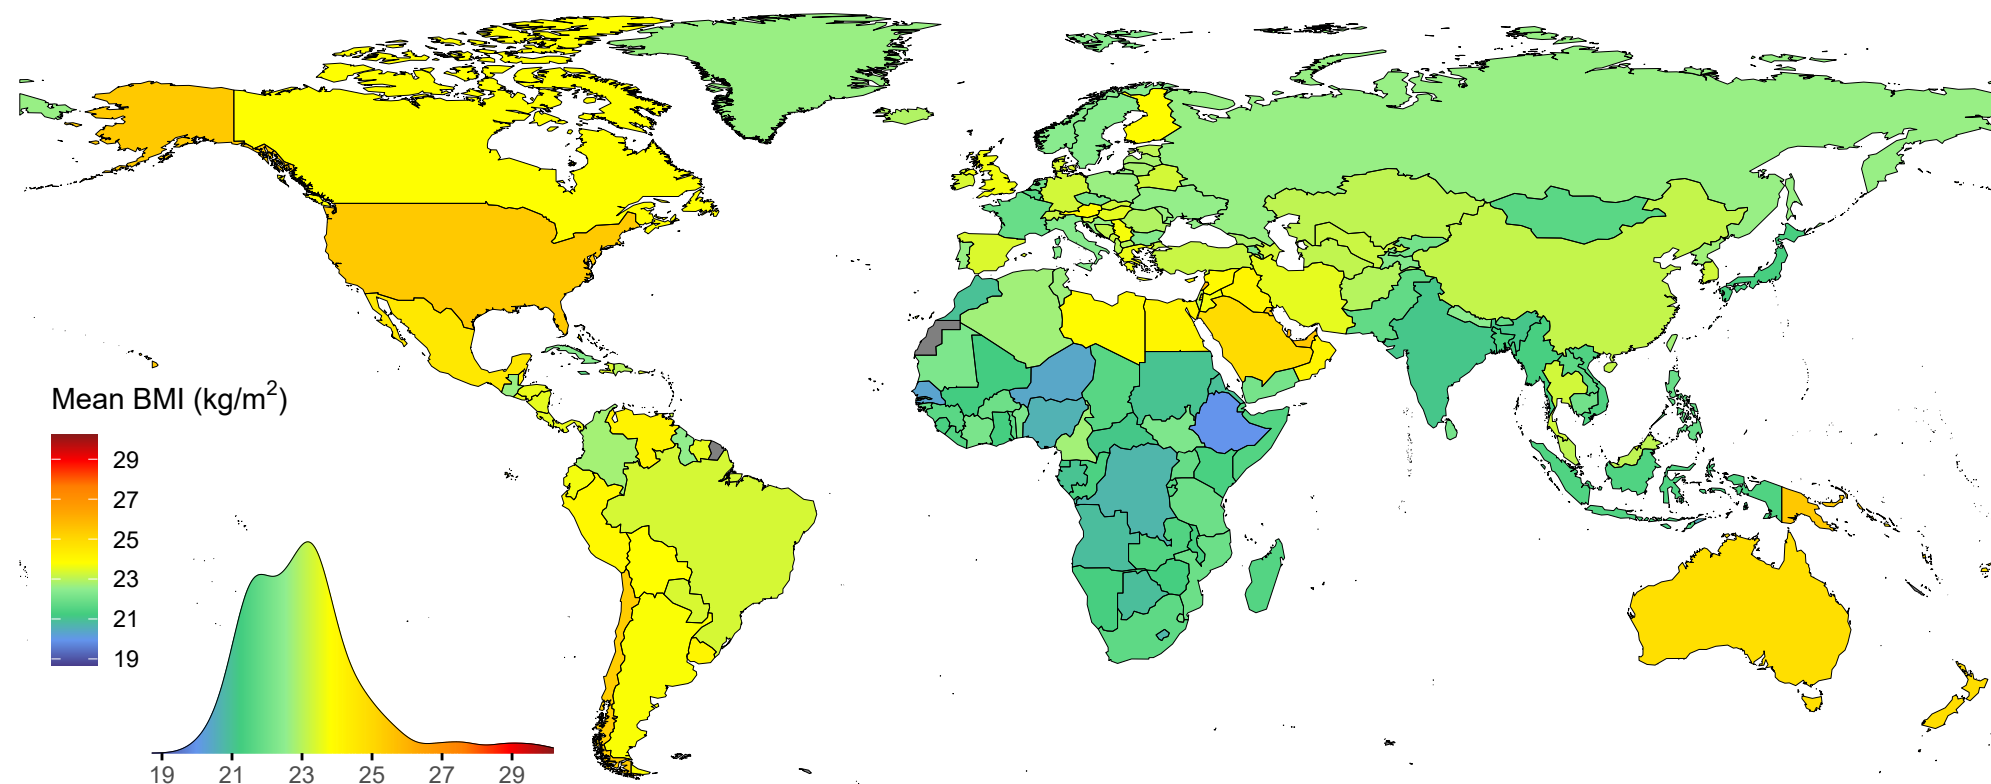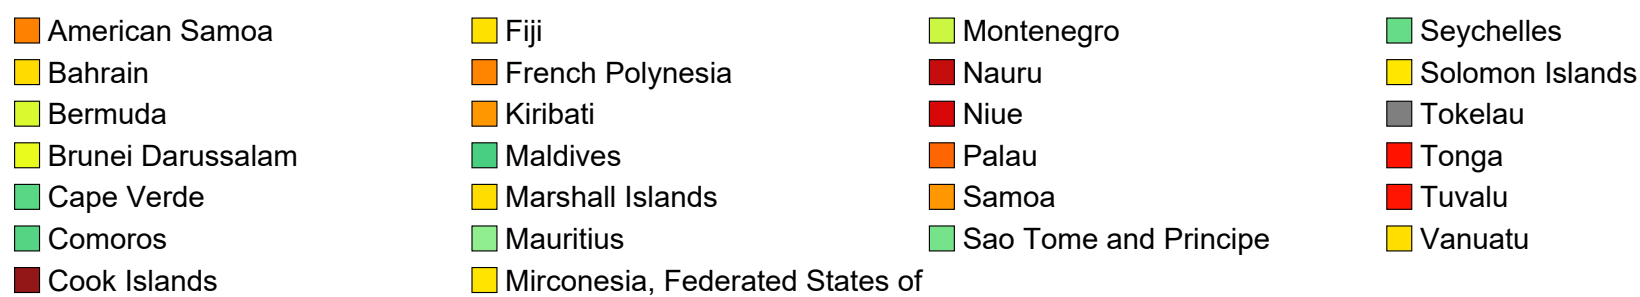

Change 1990-2020 (boys, age 19, urban)

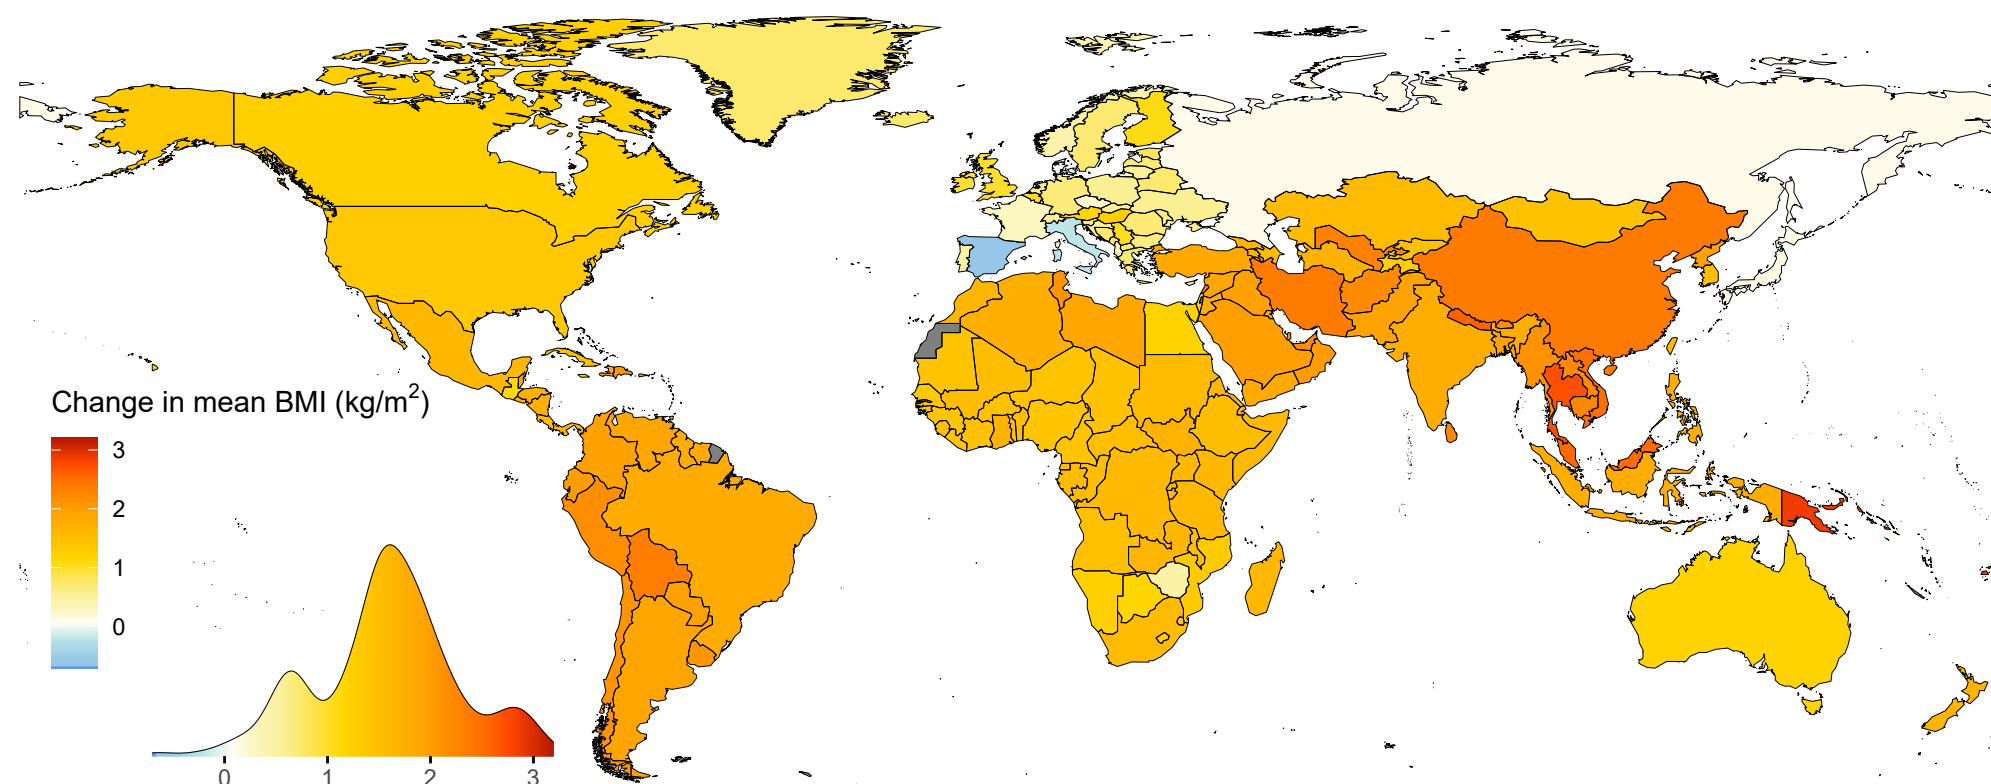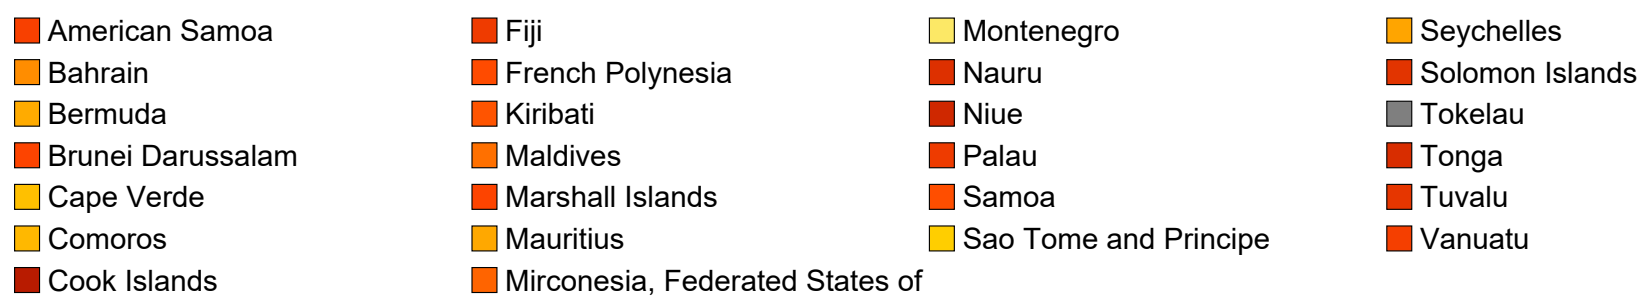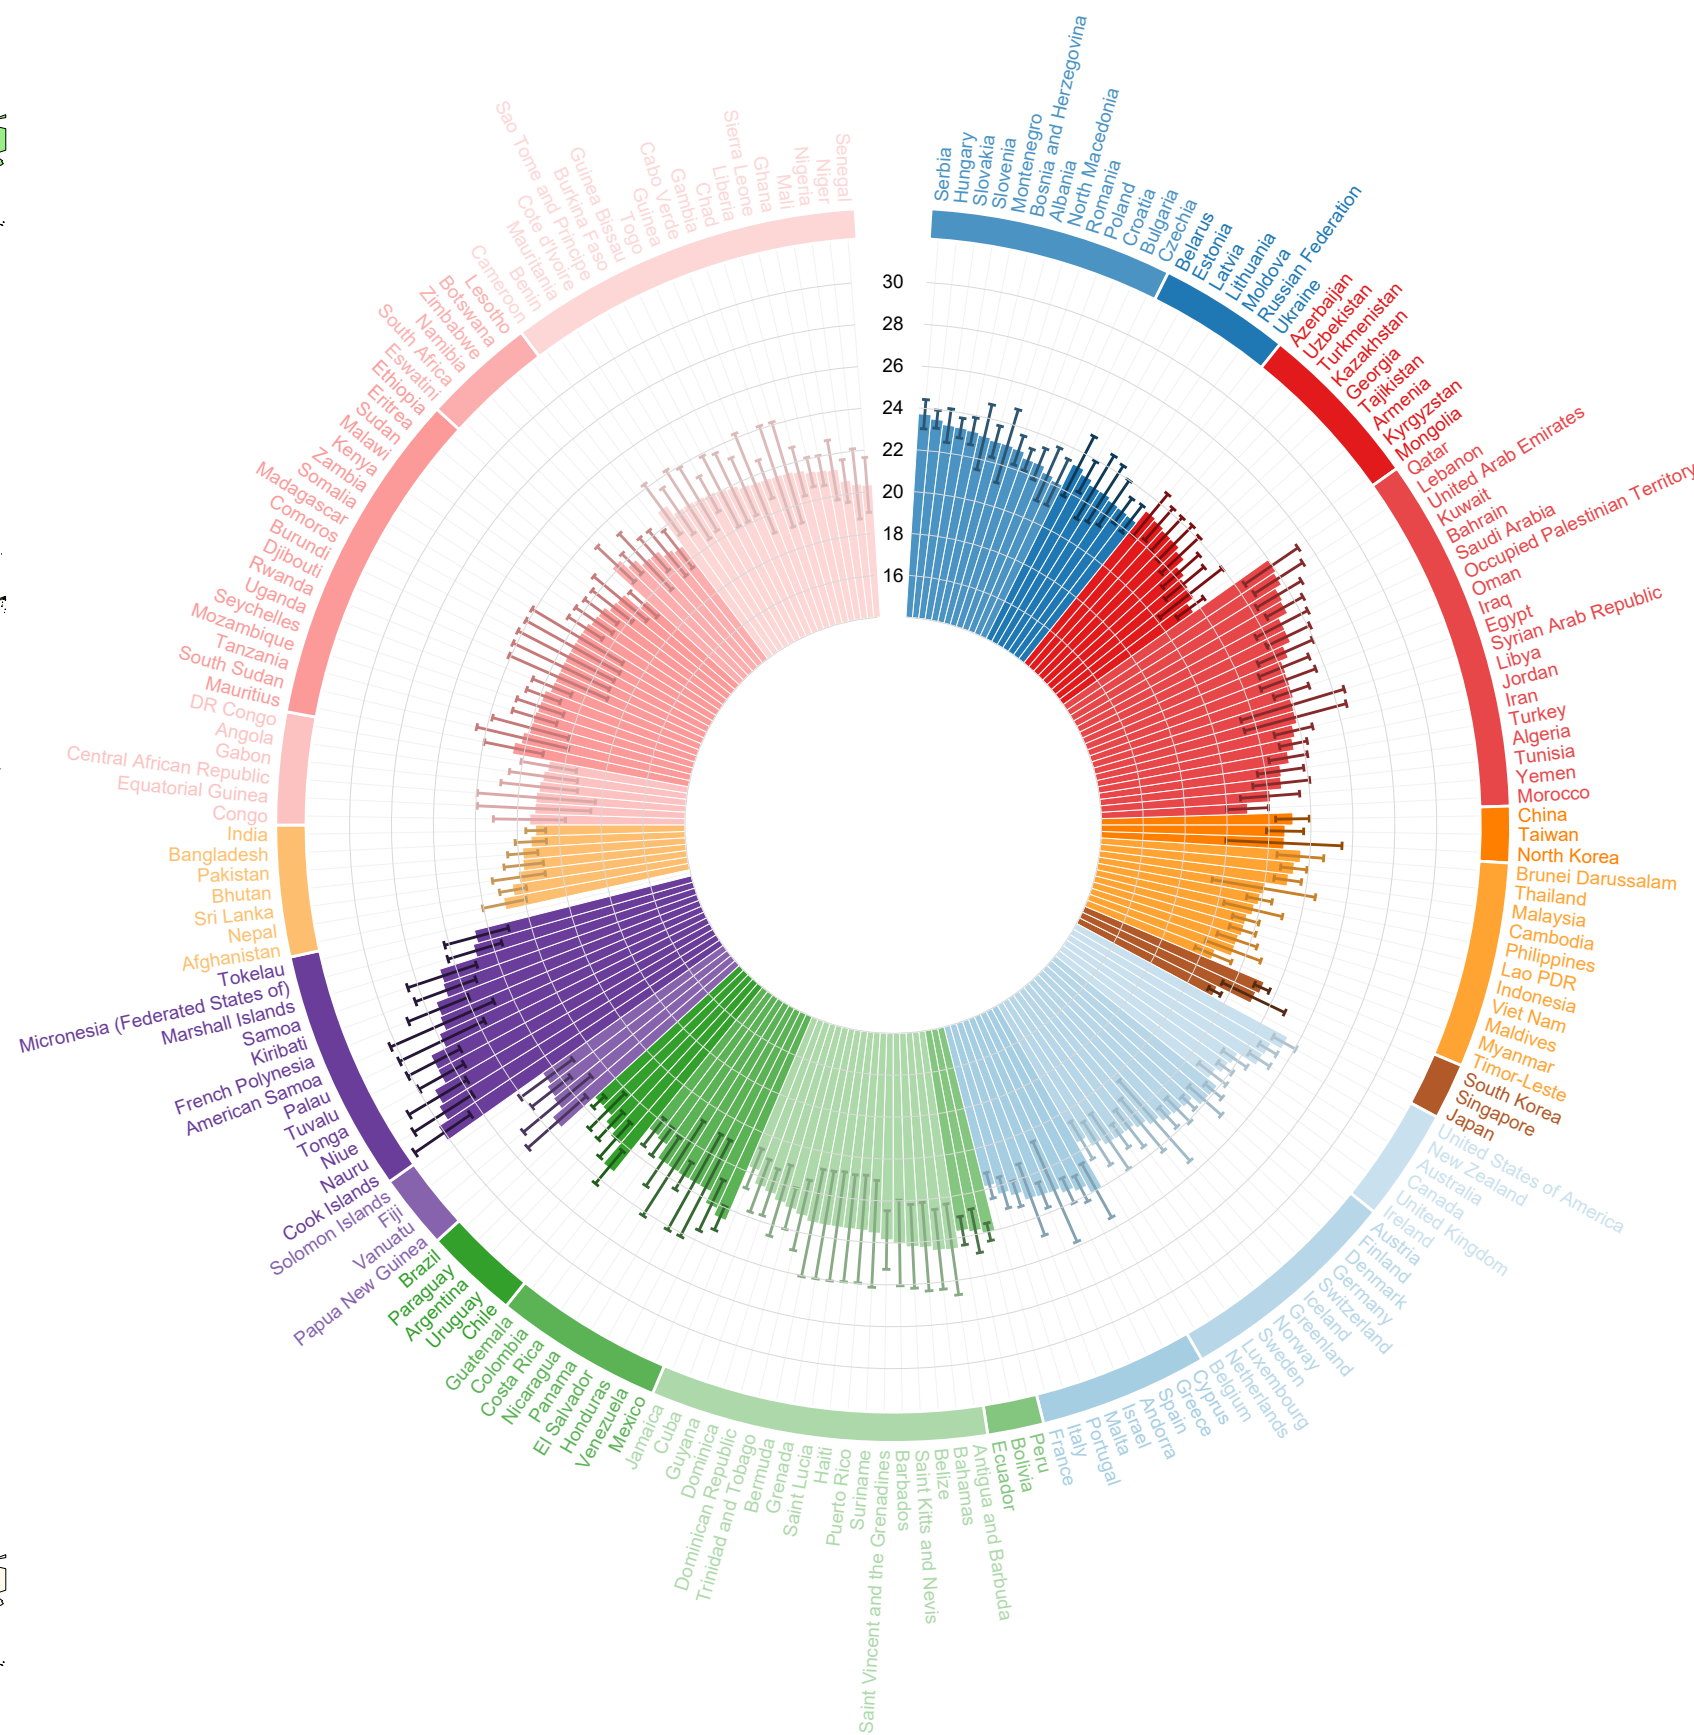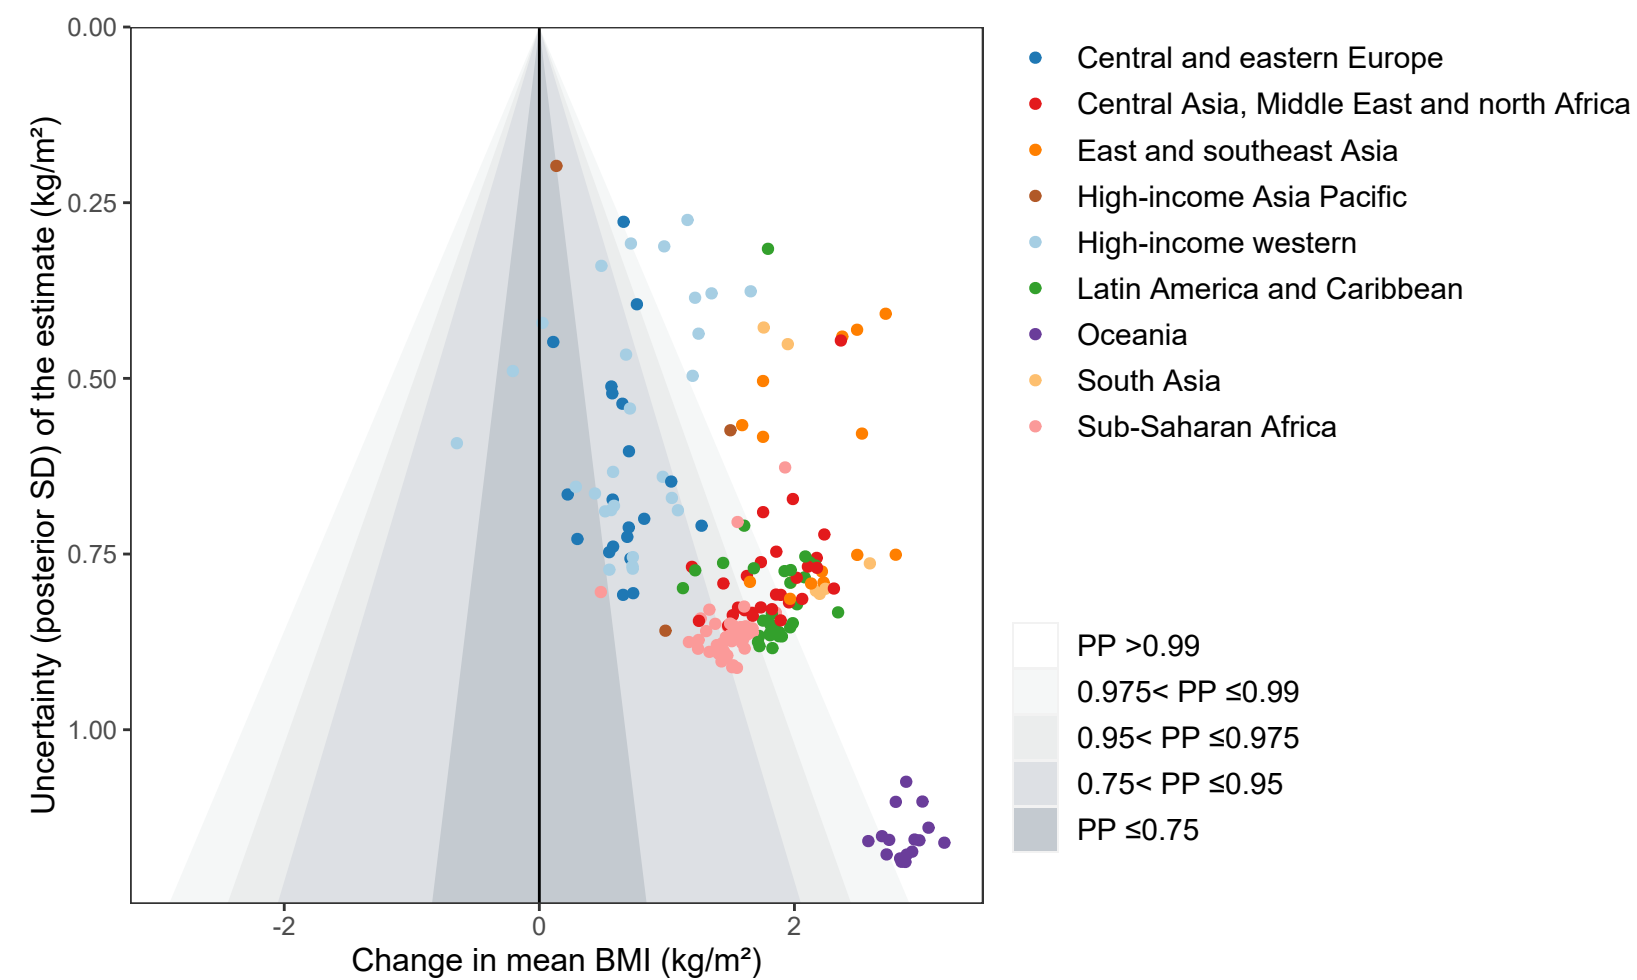



Mean BMI in 2020 (boys, age 19, rural)

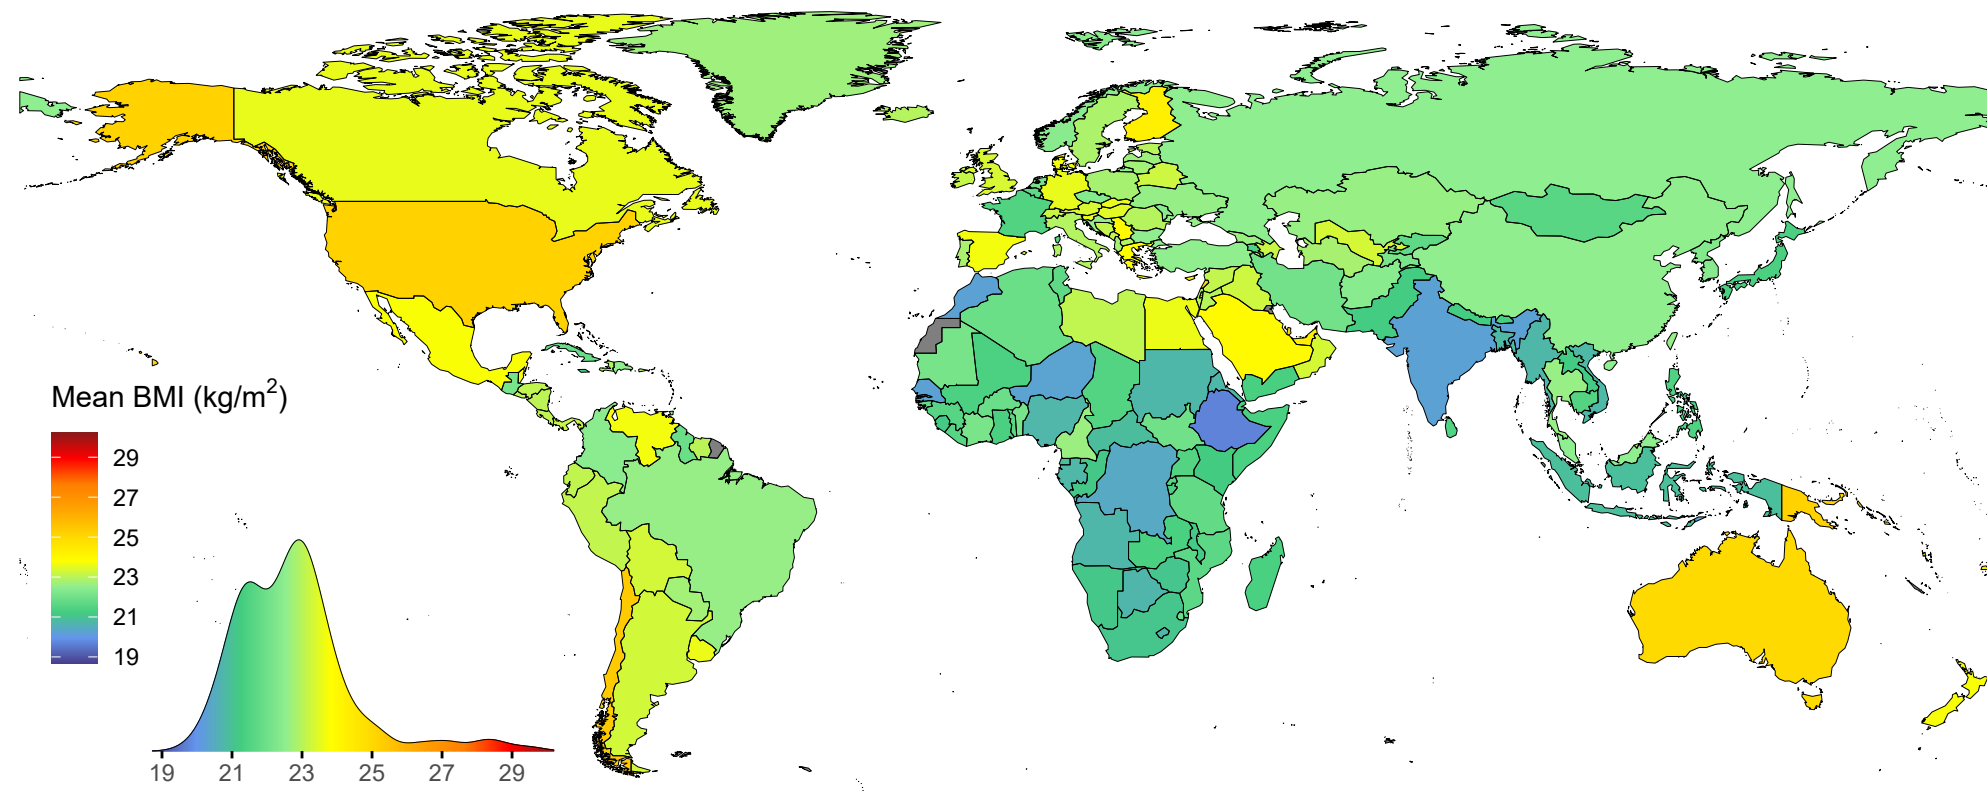

- |                                                          |                                                                        |                                                              |                                                        |
|----------------------------------------------------------|------------------------------------------------------------------------|--------------------------------------------------------------|--------------------------------------------------------|
| <span style="color: #e67e22;">■</span> American Samoa    | <span style="color: #f1c40f;">■</span> Fiji                            | <span style="color: #a9d0d9;">■</span> Montenegro            | <span style="color: #76d7c4;">■</span> Seychelles      |
| <span style="color: #f1c40f;">■</span> Bahrain           | <span style="color: #e67e22;">■</span> French Polynesia                | <span style="color: #8e8e8e;">■</span> Nauru                 | <span style="color: #f1c40f;">■</span> Solomon Islands |
| <span style="color: #8e8e8e;">■</span> Bermuda           | <span style="color: #e67e22;">■</span> Kiribati                        | <span style="color: #e74c3c;">■</span> Niue                  | <span style="color: #e74c3c;">■</span> Tokelau         |
| <span style="color: #a9d0d9;">■</span> Brunei Darussalam | <span style="color: #5dade2;">■</span> Maldives                        | <span style="color: #e67e22;">■</span> Palau                 | <span style="color: #e74c3c;">■</span> Tonga           |
| <span style="color: #76d7c4;">■</span> Cape Verde        | <span style="color: #f1c40f;">■</span> Marshall Islands                | <span style="color: #e67e22;">■</span> Samoa                 | <span style="color: #e74c3c;">■</span> Tuvalu          |
| <span style="color: #76d7c4;">■</span> Comoros           | <span style="color: #a9d0d9;">■</span> Mauritius                       | <span style="color: #a9d0d9;">■</span> Sao Tome and Principe | <span style="color: #f1c40f;">■</span> Vanuatu         |
| <span style="color: #e74c3c;">■</span> Cook Islands      | <span style="color: #f1c40f;">■</span> Mirconesia, Federated States of |                                                              |                                                        |

Change 1990-2020 (boys, age 19, rural)



- |                                                          |                                                                        |                                                              |                                                        |
|----------------------------------------------------------|------------------------------------------------------------------------|--------------------------------------------------------------|--------------------------------------------------------|
| <span style="color: #e74c3c;">■</span> American Samoa    | <span style="color: #e74c3c;">■</span> Fiji                            | <span style="color: #f1c40f;">■</span> Montenegro            | <span style="color: #e67e22;">■</span> Seychelles      |
| <span style="color: #e67e22;">■</span> Bahrain           | <span style="color: #e74c3c;">■</span> French Polynesia                | <span style="color: #8e8e8e;">■</span> Nauru                 | <span style="color: #e74c3c;">■</span> Solomon Islands |
| <span style="color: #8e8e8e;">■</span> Bermuda           | <span style="color: #e67e22;">■</span> Kiribati                        | <span style="color: #e74c3c;">■</span> Niue                  | <span style="color: #e74c3c;">■</span> Tokelau         |
| <span style="color: #e67e22;">■</span> Brunei Darussalam | <span style="color: #e67e22;">■</span> Maldives                        | <span style="color: #e67e22;">■</span> Palau                 | <span style="color: #e74c3c;">■</span> Tonga           |
| <span style="color: #e67e22;">■</span> Cape Verde        | <span style="color: #e67e22;">■</span> Marshall Islands                | <span style="color: #e67e22;">■</span> Samoa                 | <span style="color: #e74c3c;">■</span> Tuvalu          |
| <span style="color: #e67e22;">■</span> Comoros           | <span style="color: #e67e22;">■</span> Mauritius                       | <span style="color: #f1c40f;">■</span> Sao Tome and Principe | <span style="color: #e74c3c;">■</span> Vanuatu         |
| <span style="color: #e74c3c;">■</span> Cook Islands      | <span style="color: #e67e22;">■</span> Mirconesia, Federated States of |                                                              |                                                        |

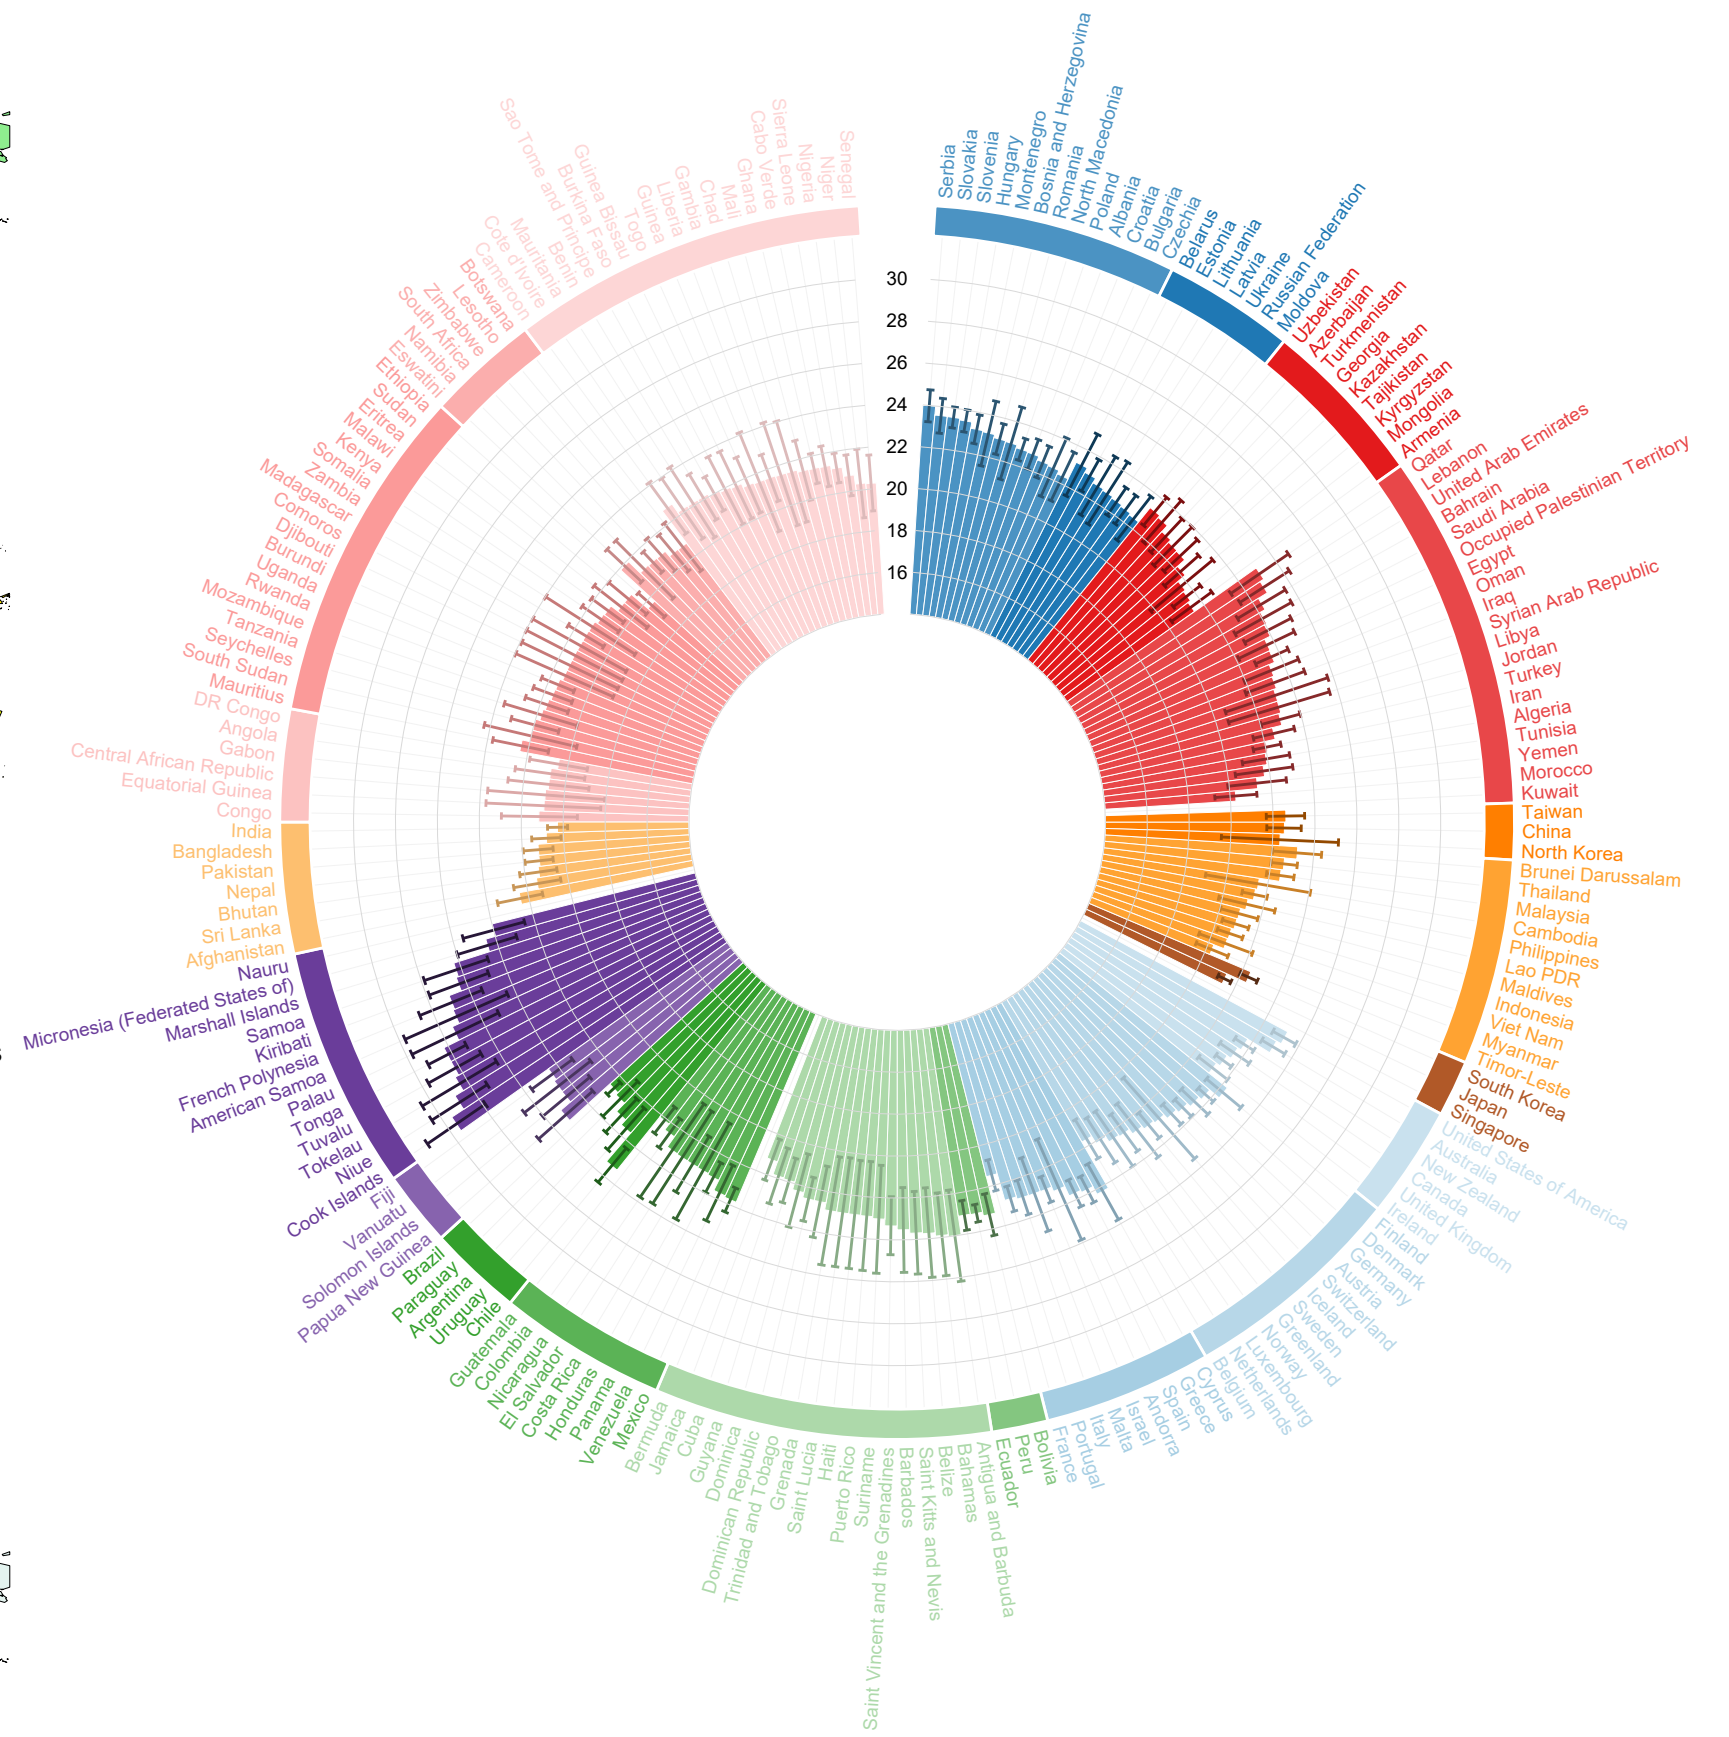

**Supplementary Figure 7.** Urban-rural height difference in 2020 and change from 1990 to 2020, by age.

The top map in each panel shows the urban-rural difference in mean height in 2020 for girls and boys at ages 5, 10, 15 and 19 years. A positive number shows higher urban mean height and a negative number shows higher rural mean height. The bottom map in each panel shows the change from 1990 to 2020. The density plot below each map shows the distribution of estimates across countries. The top right graph in each panel shows the urban-rural difference in age-standardised mean height in relation to the uncertainty of the difference measured by posterior standard deviation. The bottom right graph in each panel shows the change from 1990 to 2020 in urban-rural difference in mean height in relation to the uncertainty of the change measured by posterior standard deviation. Each point shows one country. Shaded areas approximately show the posterior probability (PP) of a true difference (top right panel) and a true increase or decrease in difference (bottom right panel).

We did not estimate the difference between rural and urban height for areas classified as entirely urban (Bermuda, Kuwait, Nauru and Singapore) or entirely rural (Tokelau), as indicated by grey colour.



### Urban-rural difference in 2020 (girls, age 5)

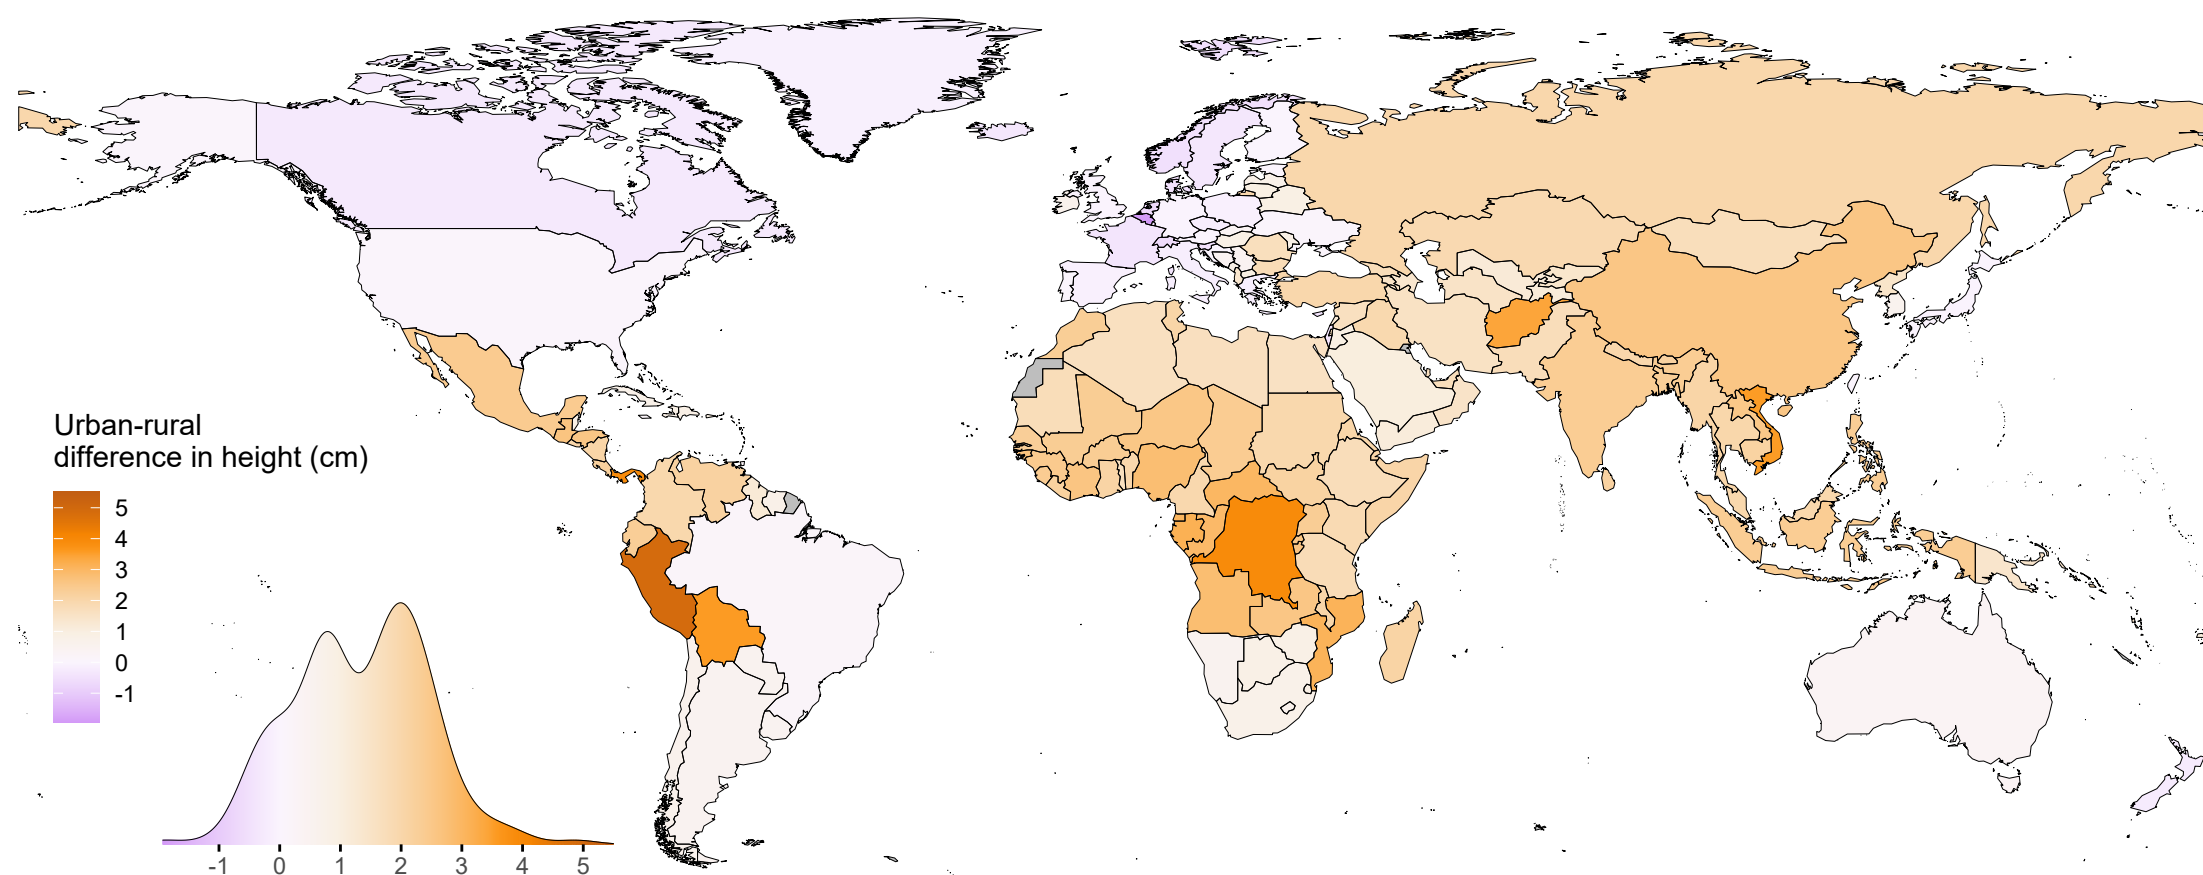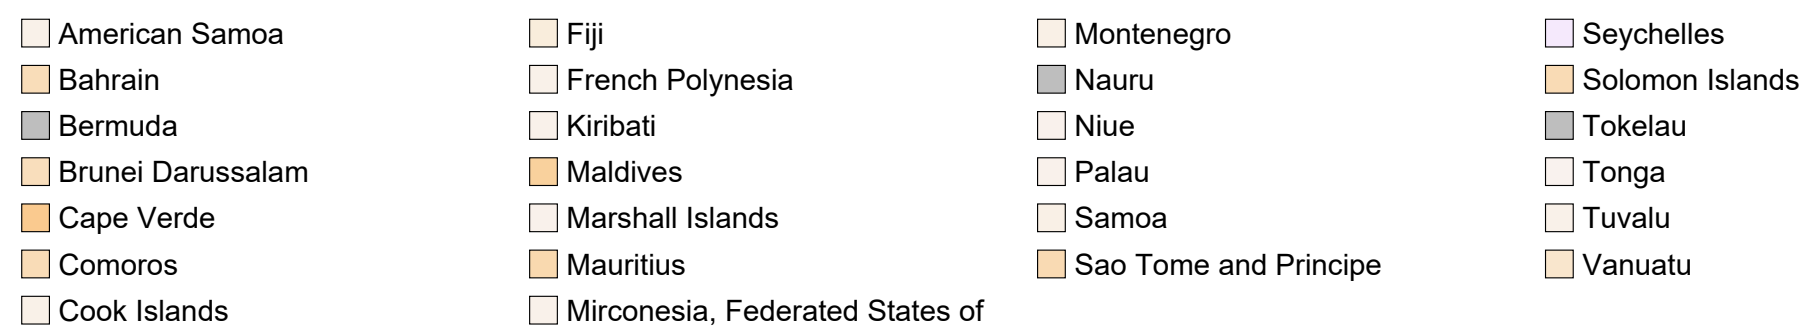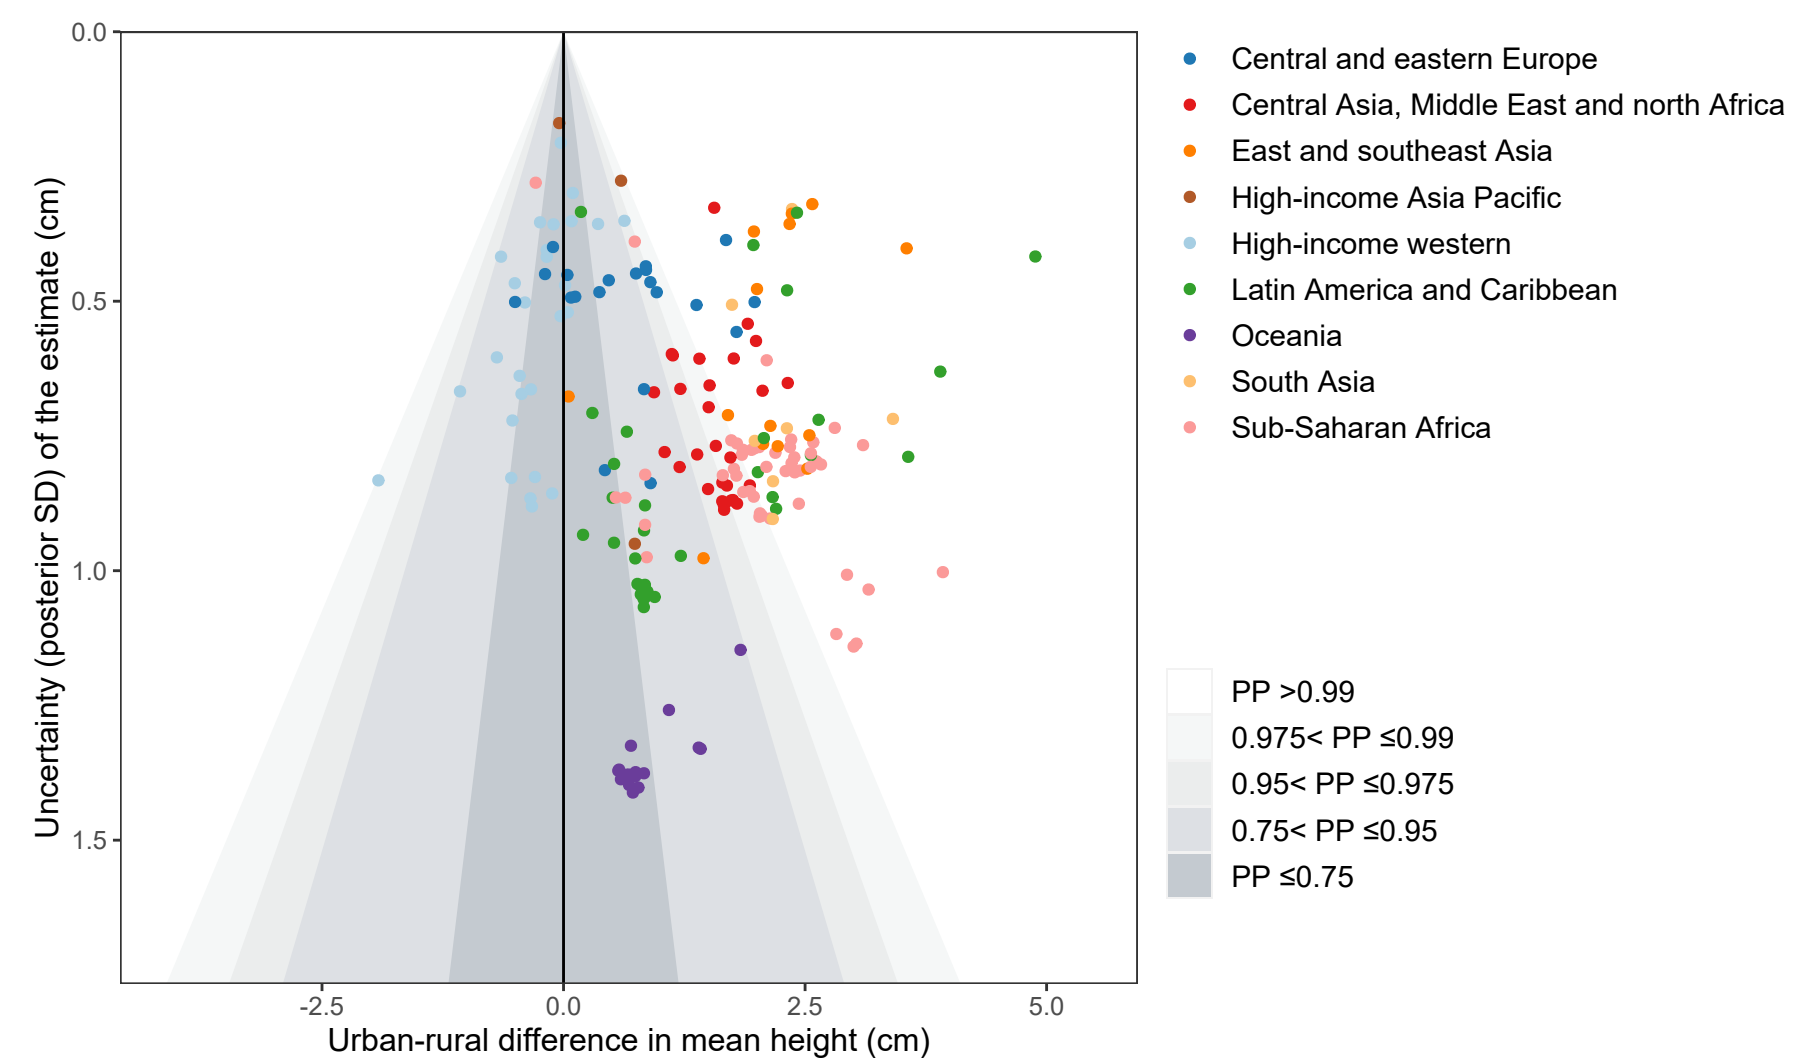

### Change 1990-2020 (girls, age 5)

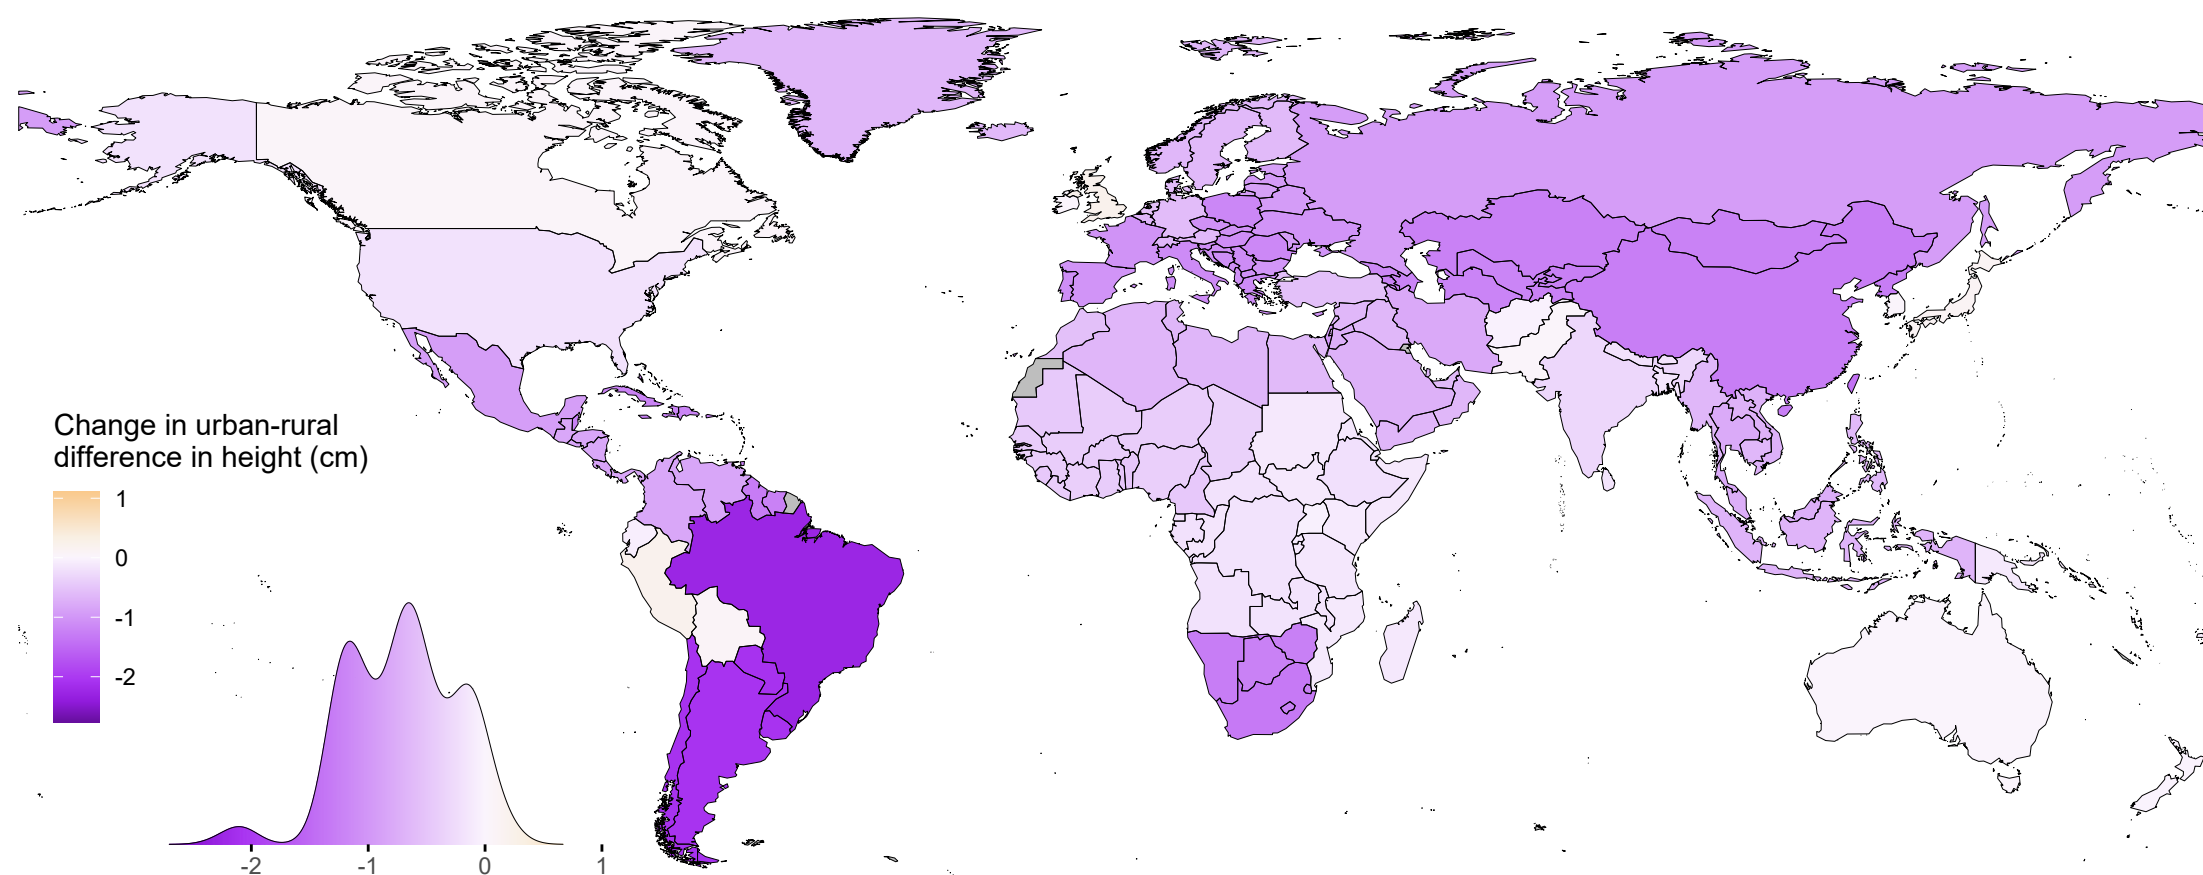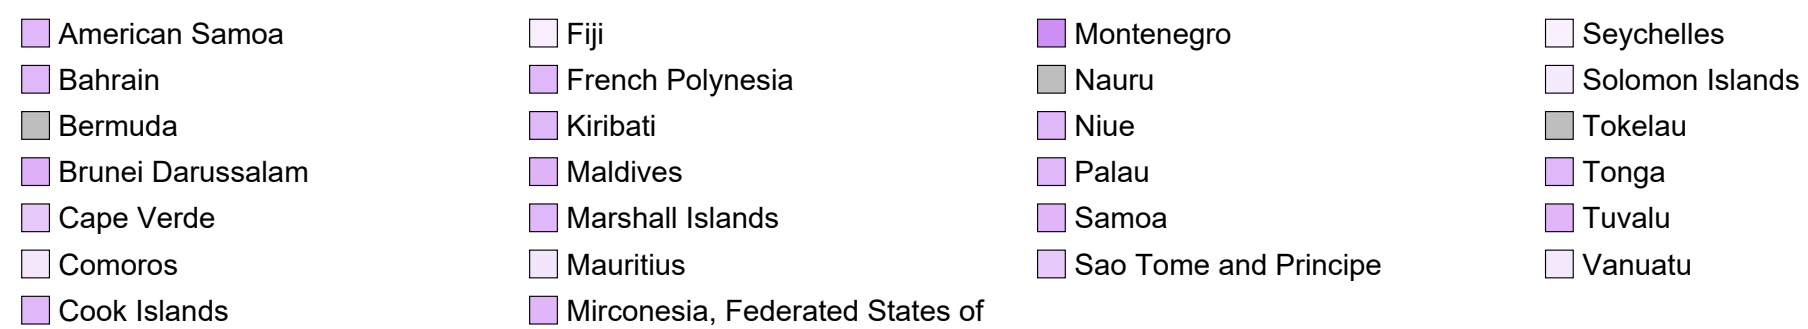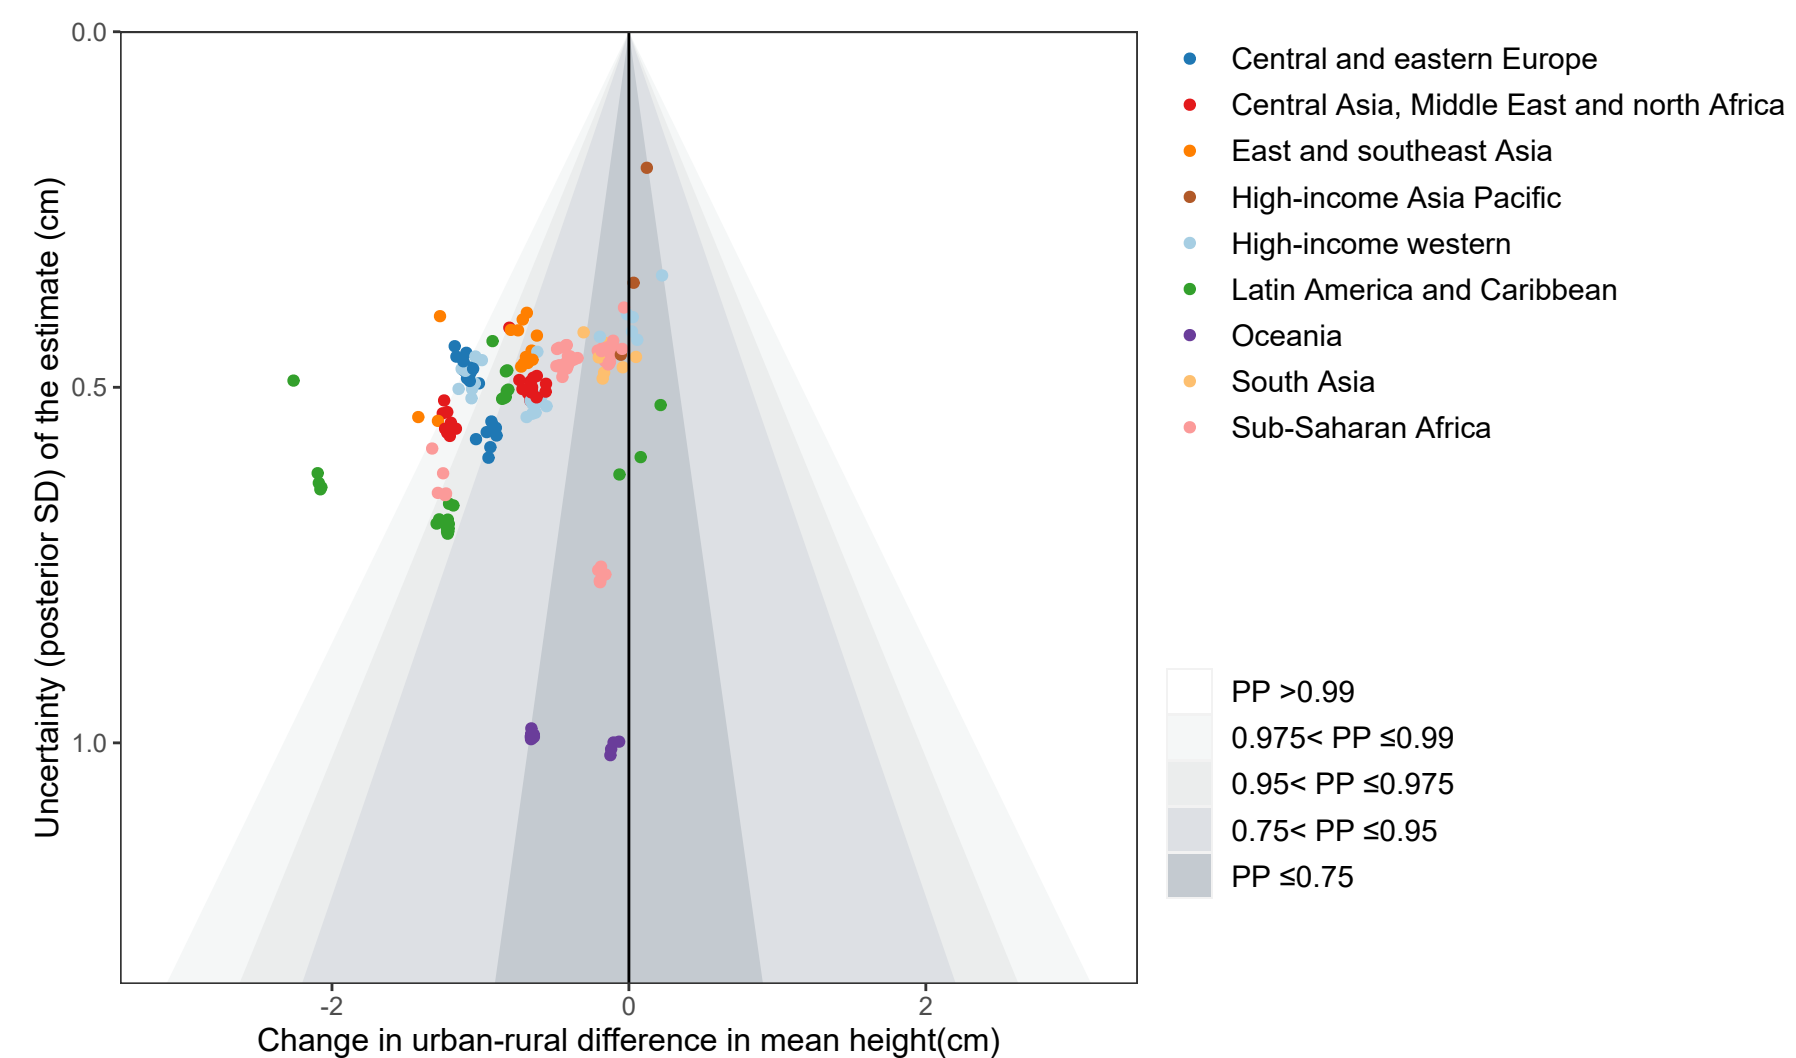

### Urban-rural difference in 2020 (boys, age 5)

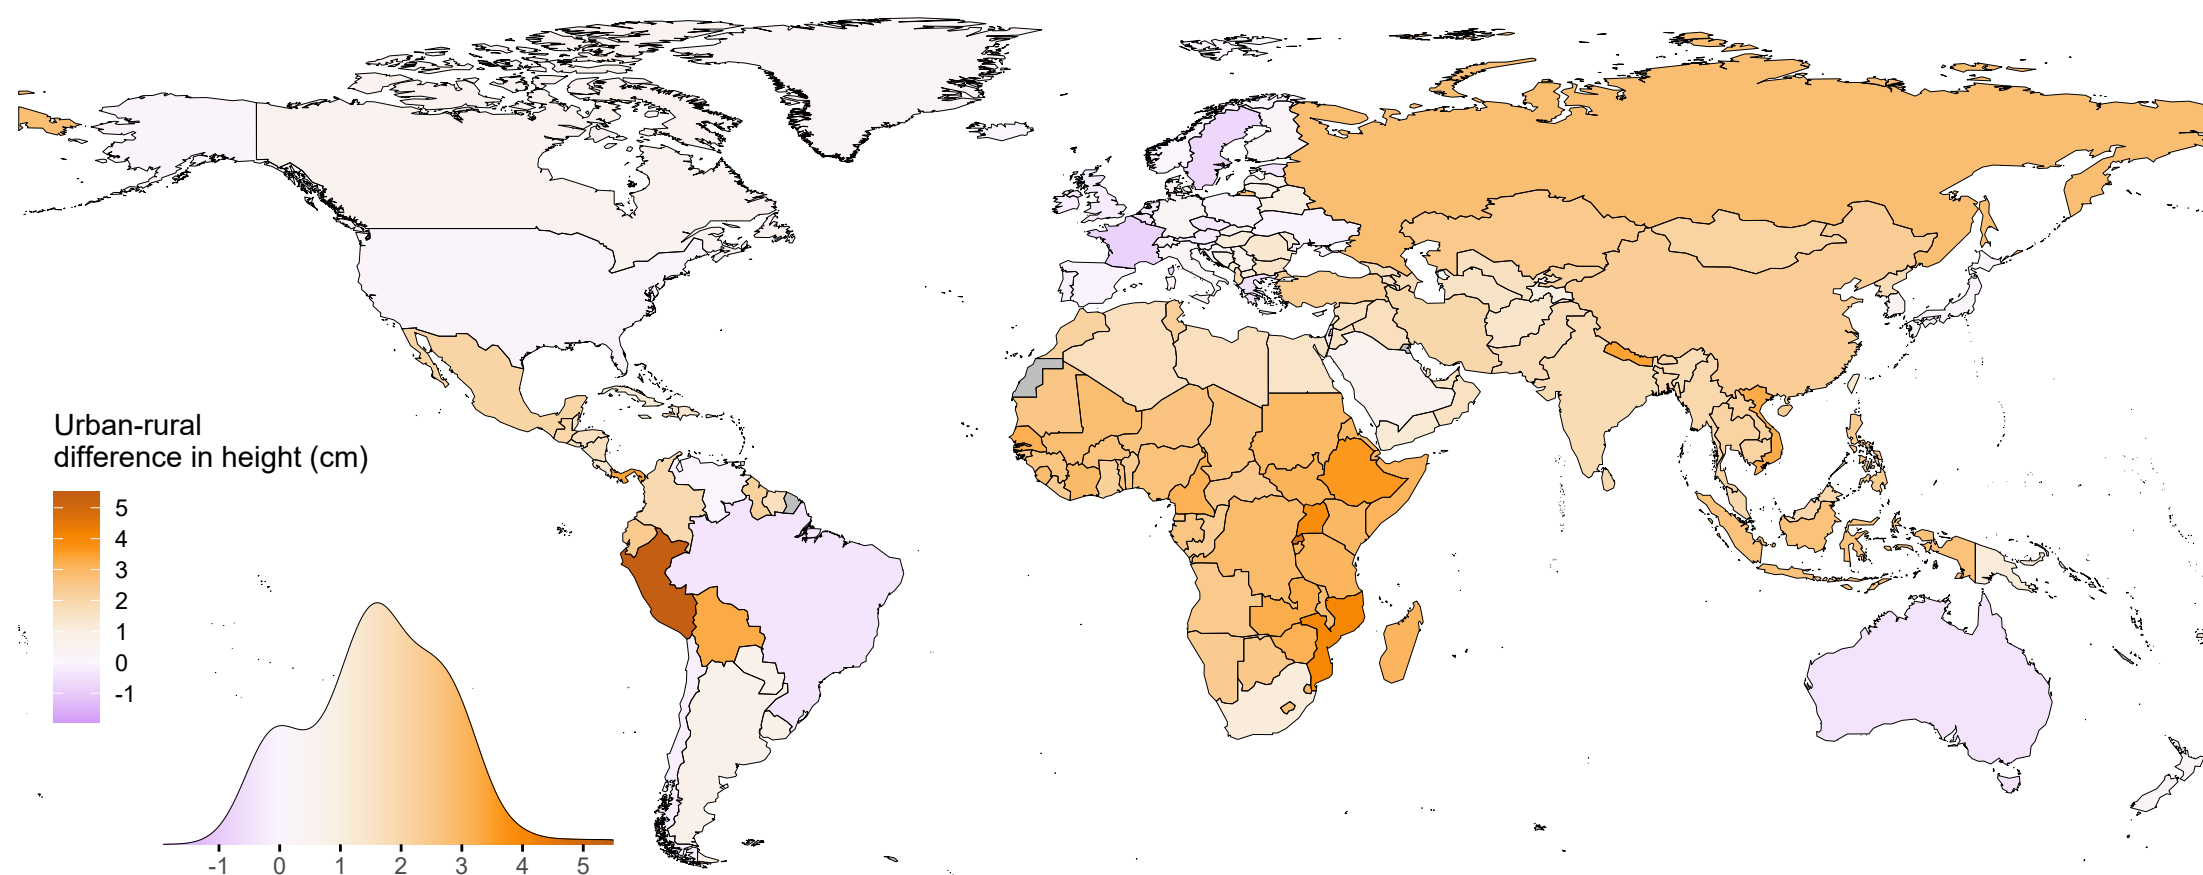

Urban-rural difference in height (cm)

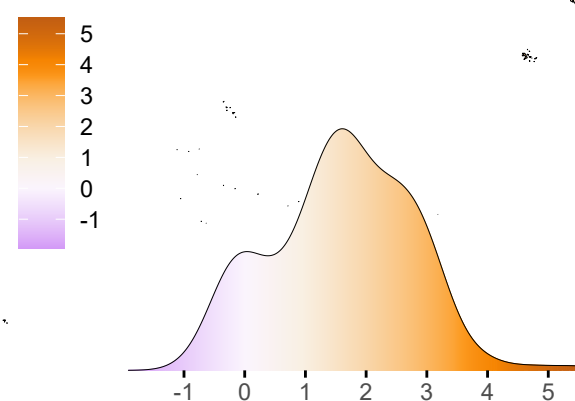

- |                   |                                 |                       |                 |
|-------------------|---------------------------------|-----------------------|-----------------|
| American Samoa    | Fiji                            | Montenegro            | Seychelles      |
| Bahrain           | French Polynesia                | Nauru                 | Solomon Islands |
| Bermuda           | Kiribati                        | Niue                  | Tokelau         |
| Brunei Darussalam | Maldives                        | Palau                 | Tonga           |
| Cape Verde        | Marshall Islands                | Samoa                 | Tuvalu          |
| Comoros           | Mauritius                       | Sao Tome and Principe | Vanuatu         |
| Cook Islands      | Mirconesia, Federated States of |                       |                 |

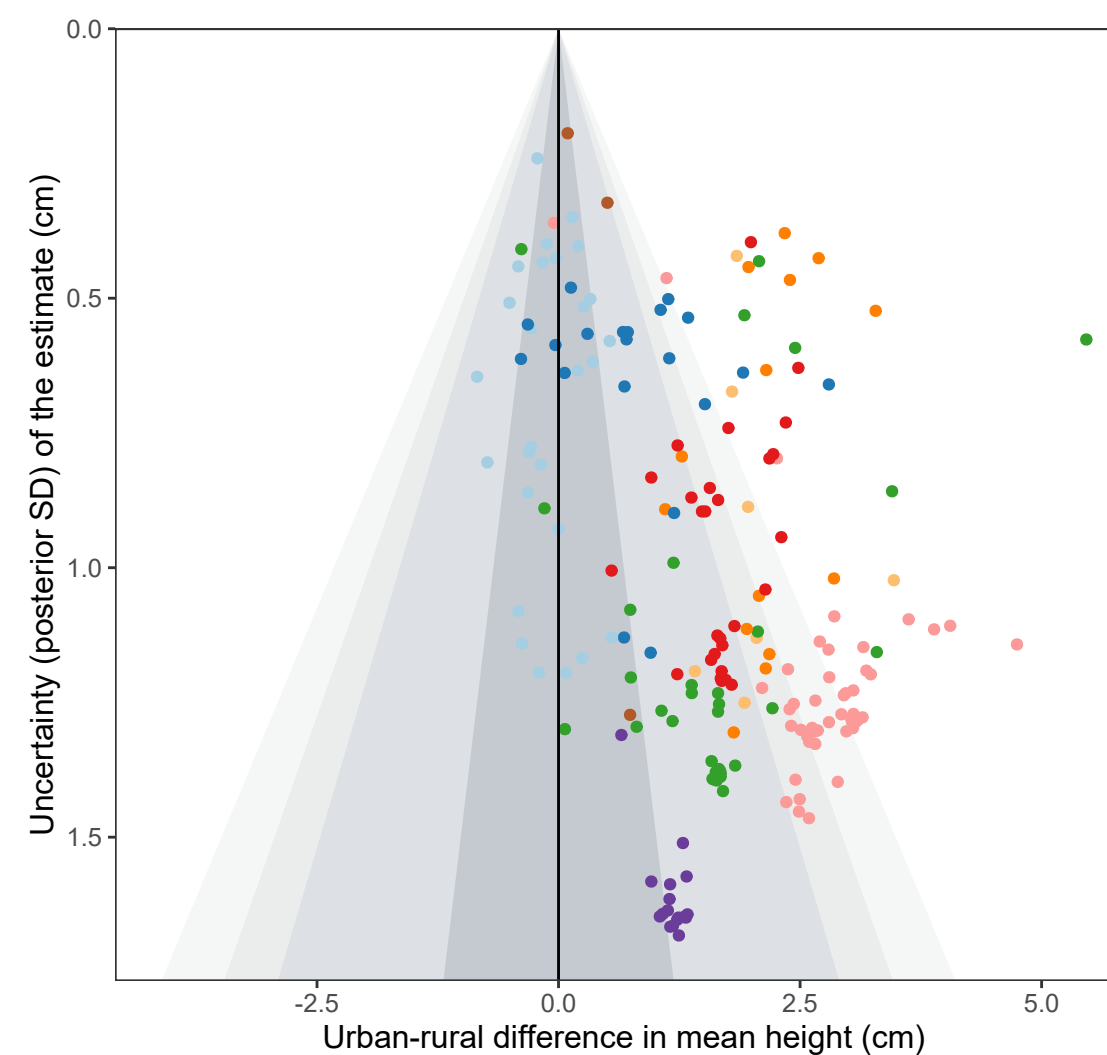

- Central and eastern Europe
- Central Asia, Middle East and north Africa
- East and southeast Asia
- High-income Asia Pacific
- High-income western
- Latin America and Caribbean
- Oceania
- South Asia
- Sub-Saharan Africa

- PP > 0.99
- 0.975 < PP ≤ 0.99
- 0.95 < PP ≤ 0.975
- 0.75 < PP ≤ 0.95
- PP ≤ 0.75

### Change 1990-2020 (boys, age 5)

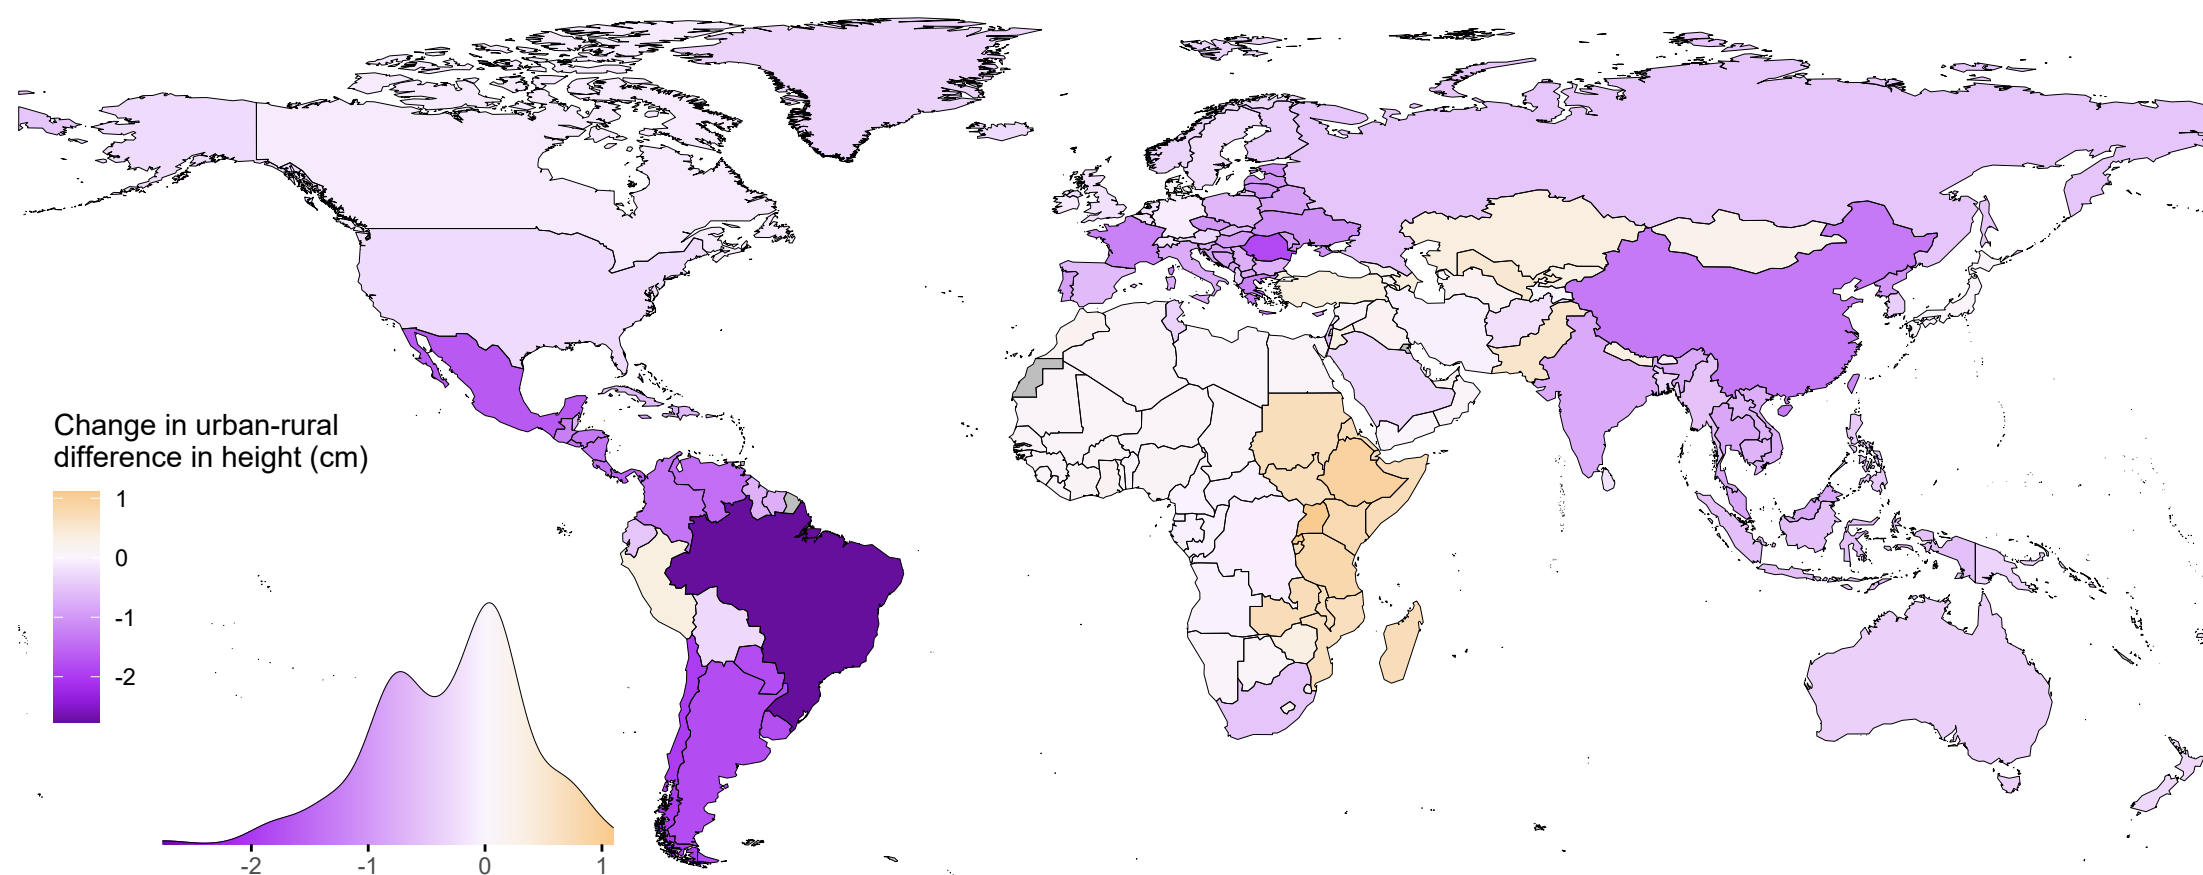

Change in urban-rural difference in height (cm)

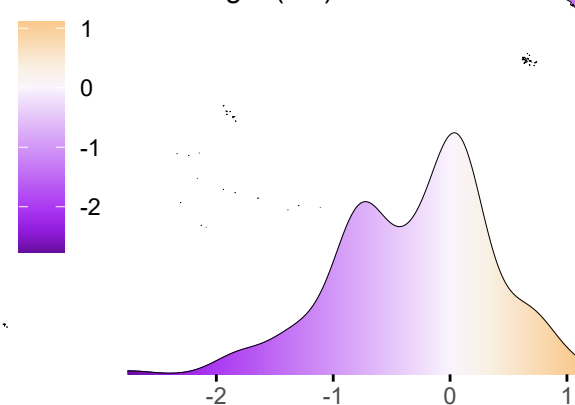

- |                   |                                 |                       |                 |
|-------------------|---------------------------------|-----------------------|-----------------|
| American Samoa    | Fiji                            | Montenegro            | Seychelles      |
| Bahrain           | French Polynesia                | Nauru                 | Solomon Islands |
| Bermuda           | Kiribati                        | Niue                  | Tokelau         |
| Brunei Darussalam | Maldives                        | Palau                 | Tonga           |
| Cape Verde        | Marshall Islands                | Samoa                 | Tuvalu          |
| Comoros           | Mauritius                       | Sao Tome and Principe | Vanuatu         |
| Cook Islands      | Mirconesia, Federated States of |                       |                 |

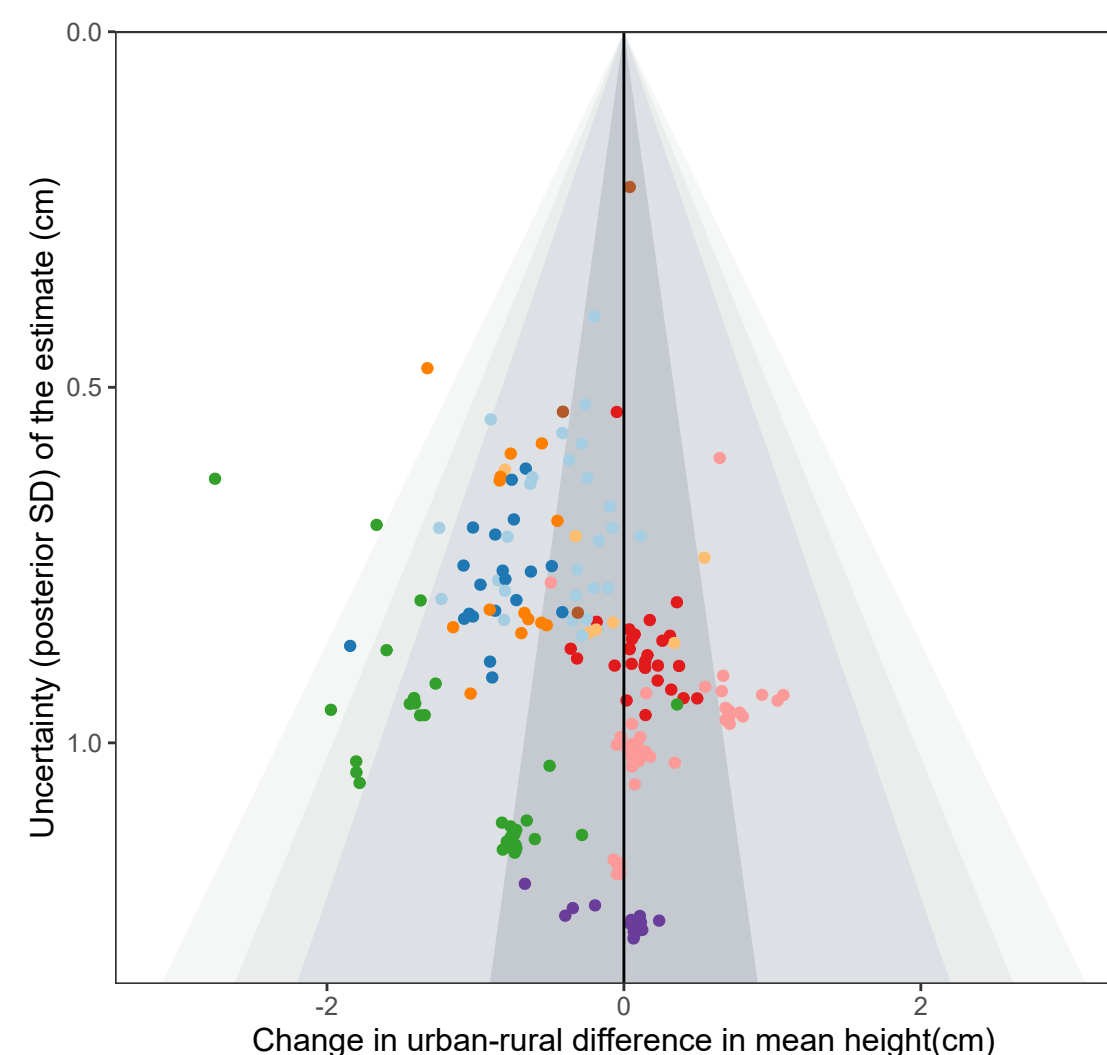

- Central and eastern Europe
- Central Asia, Middle East and north Africa
- East and southeast Asia
- High-income Asia Pacific
- High-income western
- Latin America and Caribbean
- Oceania
- South Asia
- Sub-Saharan Africa

- PP > 0.99
- 0.975 < PP ≤ 0.99
- 0.95 < PP ≤ 0.975
- 0.75 < PP ≤ 0.95
- PP ≤ 0.75



### Urban-rural difference in 2020 (girls, age 10)

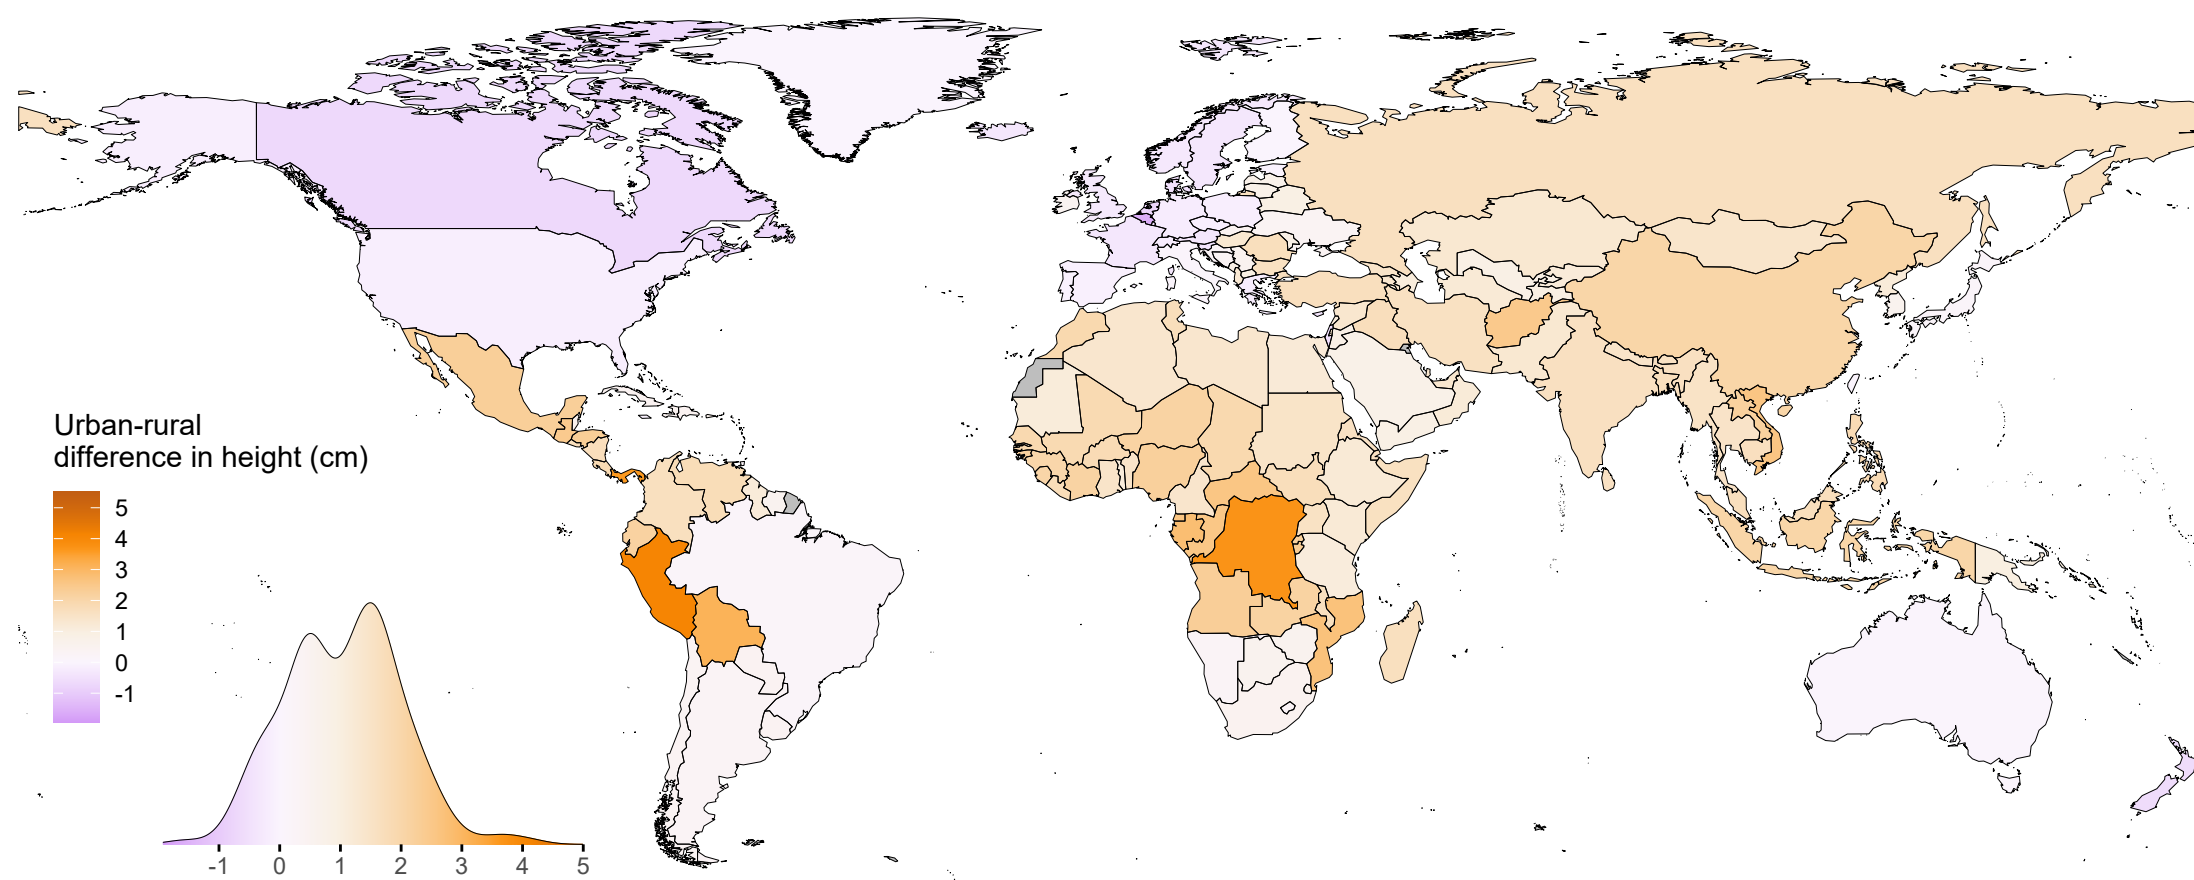

Urban-rural difference in height (cm)

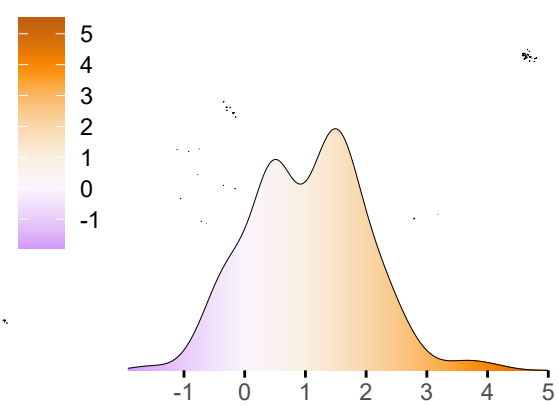

- |                                            |                                                          |                                                |                                          |
|--------------------------------------------|----------------------------------------------------------|------------------------------------------------|------------------------------------------|
| <input type="checkbox"/> American Samoa    | <input type="checkbox"/> Fiji                            | <input type="checkbox"/> Montenegro            | <input type="checkbox"/> Seychelles      |
| <input type="checkbox"/> Bahrain           | <input type="checkbox"/> French Polynesia                | <input type="checkbox"/> Nauru                 | <input type="checkbox"/> Solomon Islands |
| <input type="checkbox"/> Bermuda           | <input type="checkbox"/> Kiribati                        | <input type="checkbox"/> Niue                  | <input type="checkbox"/> Tokelau         |
| <input type="checkbox"/> Brunei Darussalam | <input type="checkbox"/> Maldives                        | <input type="checkbox"/> Palau                 | <input type="checkbox"/> Tonga           |
| <input type="checkbox"/> Cape Verde        | <input type="checkbox"/> Marshall Islands                | <input type="checkbox"/> Samoa                 | <input type="checkbox"/> Tuvalu          |
| <input type="checkbox"/> Comoros           | <input type="checkbox"/> Mauritius                       | <input type="checkbox"/> Sao Tome and Principe | <input type="checkbox"/> Vanuatu         |
| <input type="checkbox"/> Cook Islands      | <input type="checkbox"/> Mirconesia, Federated States of |                                                |                                          |

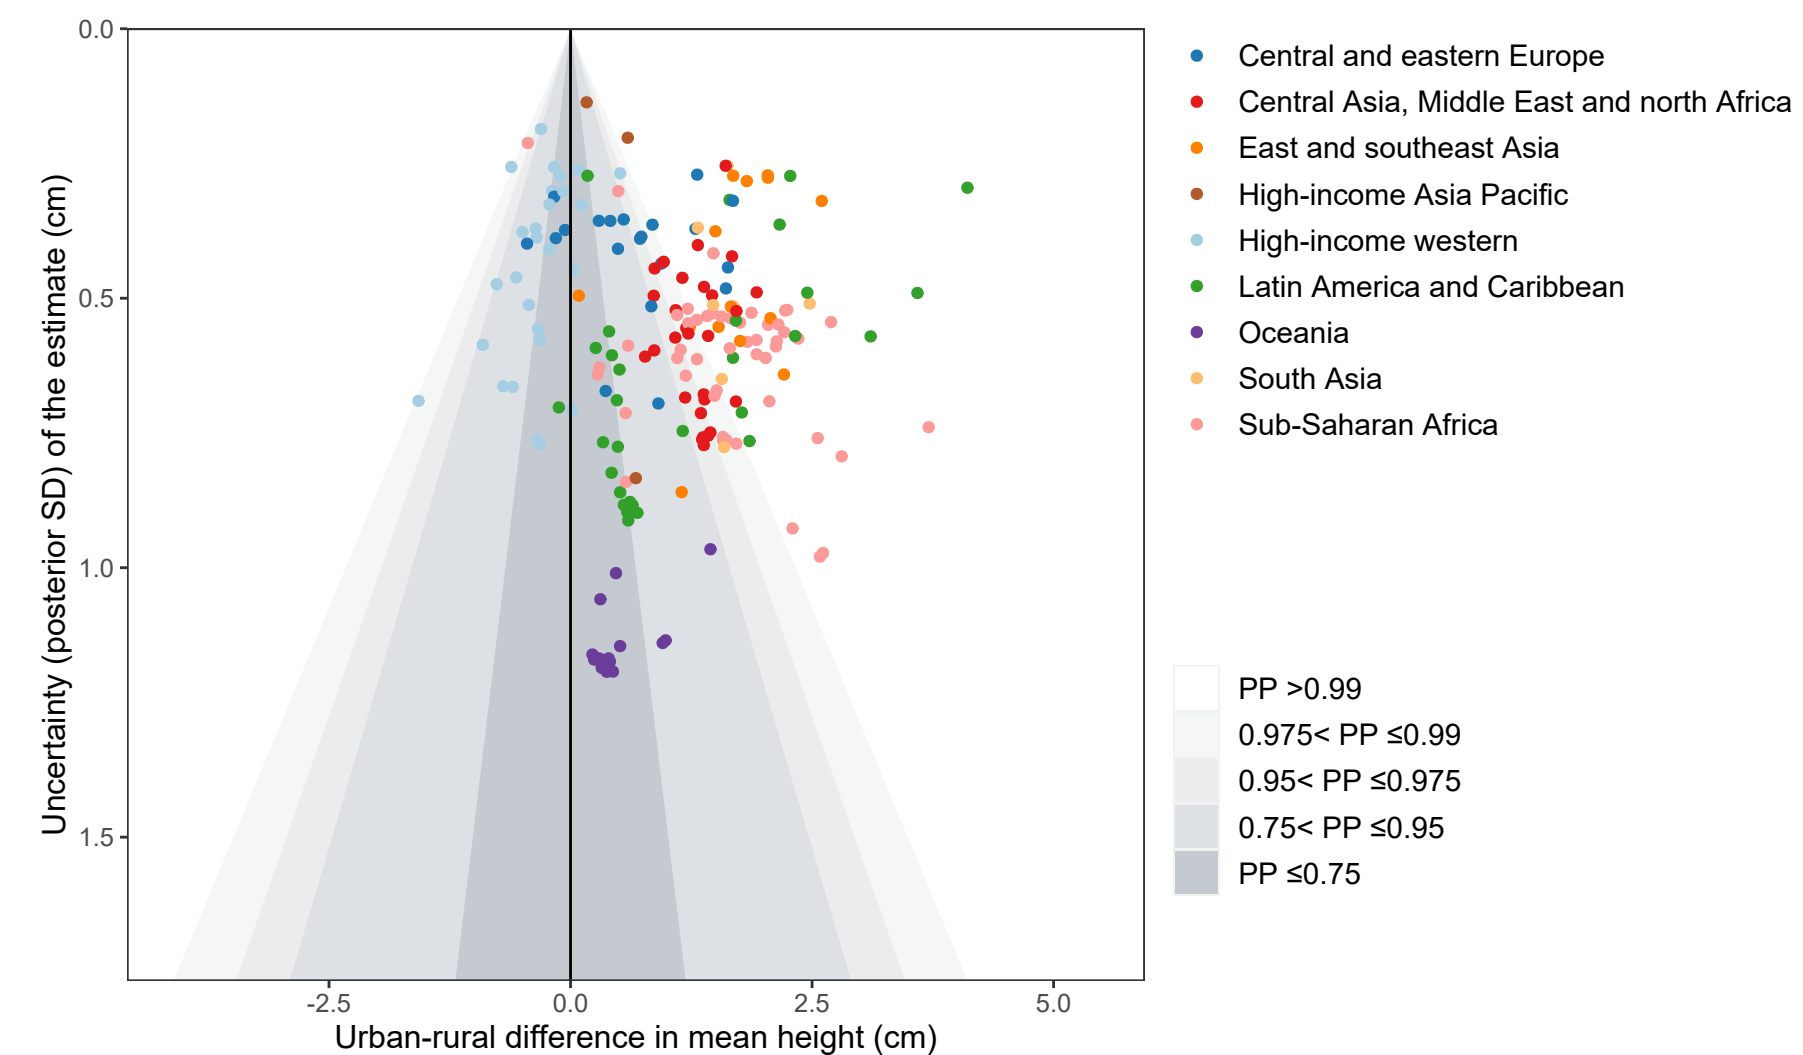

- Central and eastern Europe
- Central Asia, Middle East and north Africa
- East and southeast Asia
- High-income Asia Pacific
- High-income western
- Latin America and Caribbean
- Oceania
- South Asia
- Sub-Saharan Africa

- PP >0.99
- 0.975 < PP ≤ 0.99
- 0.95 < PP ≤ 0.975
- 0.75 < PP ≤ 0.95
- PP ≤ 0.75

### Change 1990-2020 (girls, age 10)

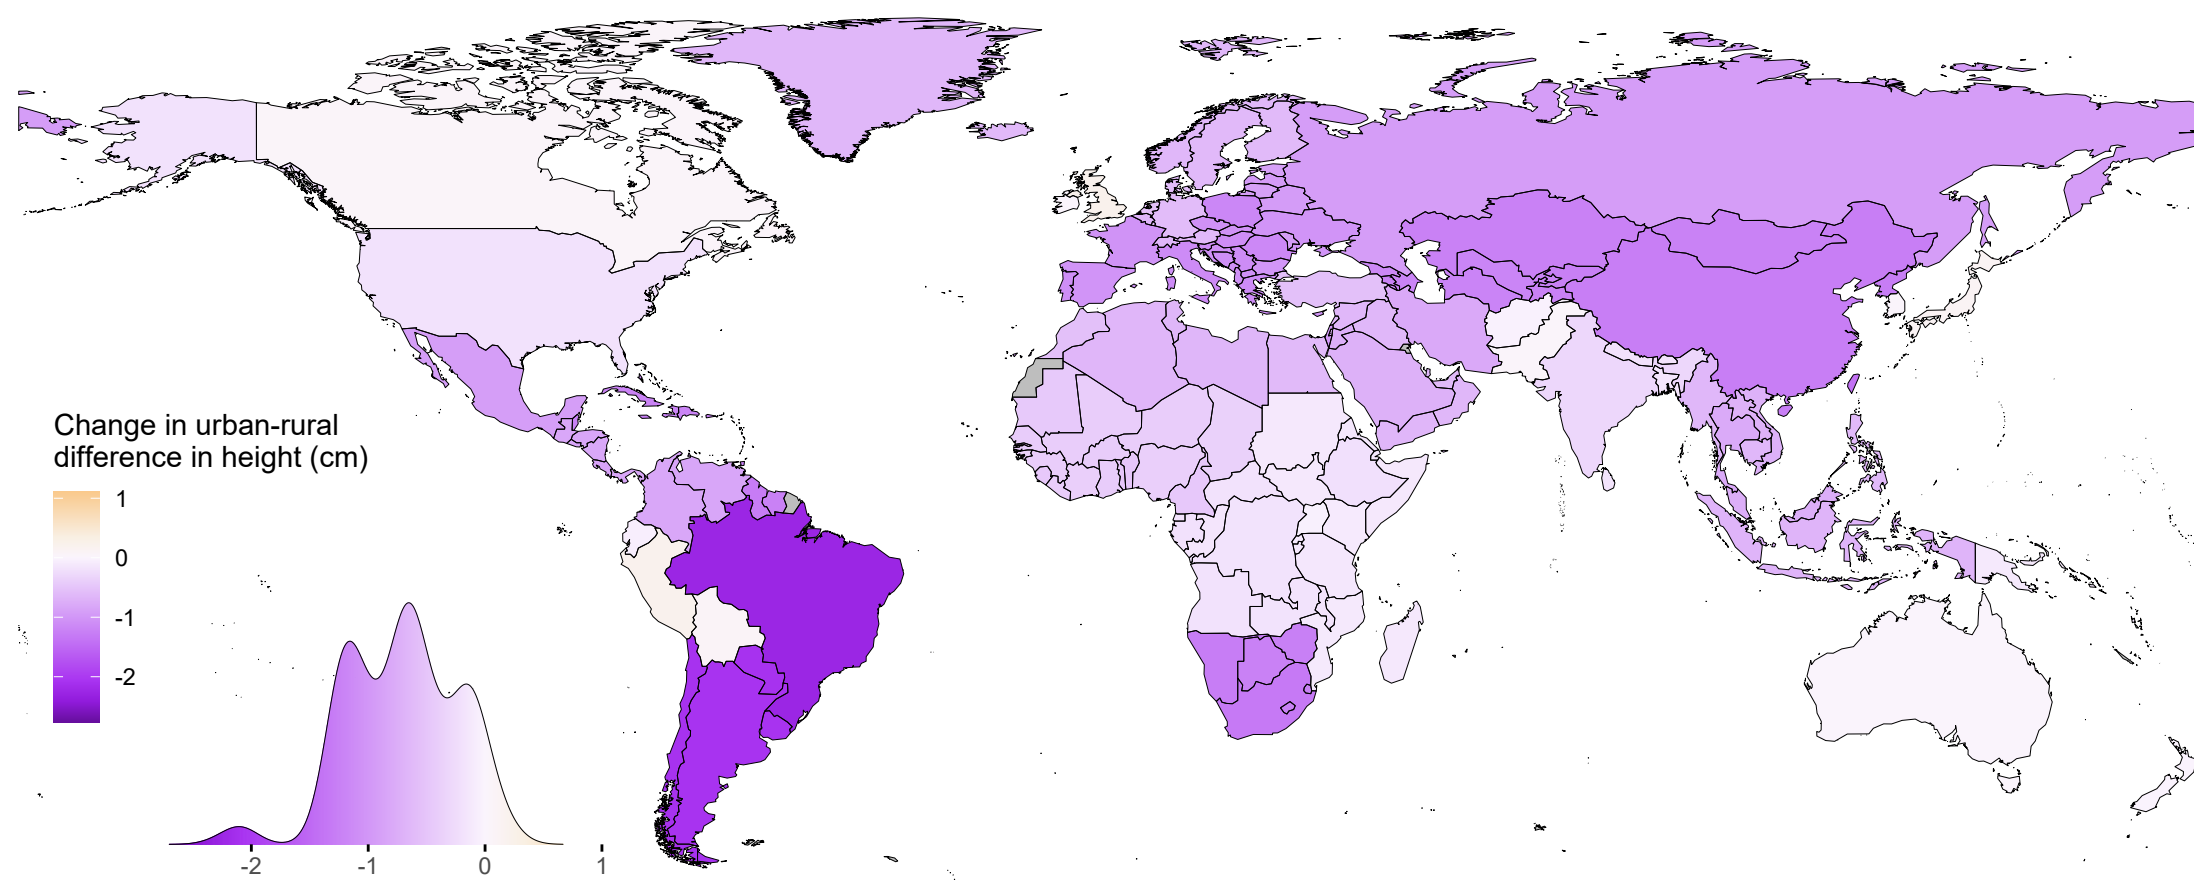

Change in urban-rural difference in height (cm)

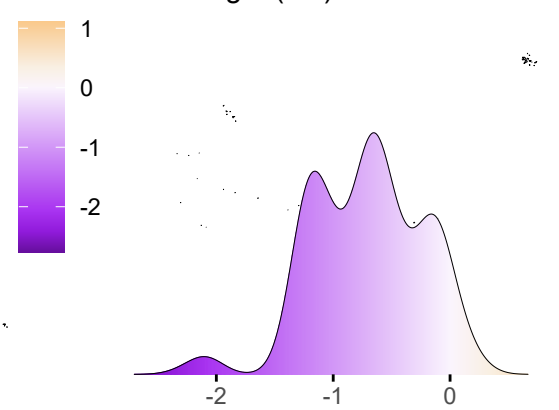

- |                                            |                                                          |                                                |                                          |
|--------------------------------------------|----------------------------------------------------------|------------------------------------------------|------------------------------------------|
| <input type="checkbox"/> American Samoa    | <input type="checkbox"/> Fiji                            | <input type="checkbox"/> Montenegro            | <input type="checkbox"/> Seychelles      |
| <input type="checkbox"/> Bahrain           | <input type="checkbox"/> French Polynesia                | <input type="checkbox"/> Nauru                 | <input type="checkbox"/> Solomon Islands |
| <input type="checkbox"/> Bermuda           | <input type="checkbox"/> Kiribati                        | <input type="checkbox"/> Niue                  | <input type="checkbox"/> Tokelau         |
| <input type="checkbox"/> Brunei Darussalam | <input type="checkbox"/> Maldives                        | <input type="checkbox"/> Palau                 | <input type="checkbox"/> Tonga           |
| <input type="checkbox"/> Cape Verde        | <input type="checkbox"/> Marshall Islands                | <input type="checkbox"/> Samoa                 | <input type="checkbox"/> Tuvalu          |
| <input type="checkbox"/> Comoros           | <input type="checkbox"/> Mauritius                       | <input type="checkbox"/> Sao Tome and Principe | <input type="checkbox"/> Vanuatu         |
| <input type="checkbox"/> Cook Islands      | <input type="checkbox"/> Mirconesia, Federated States of |                                                |                                          |

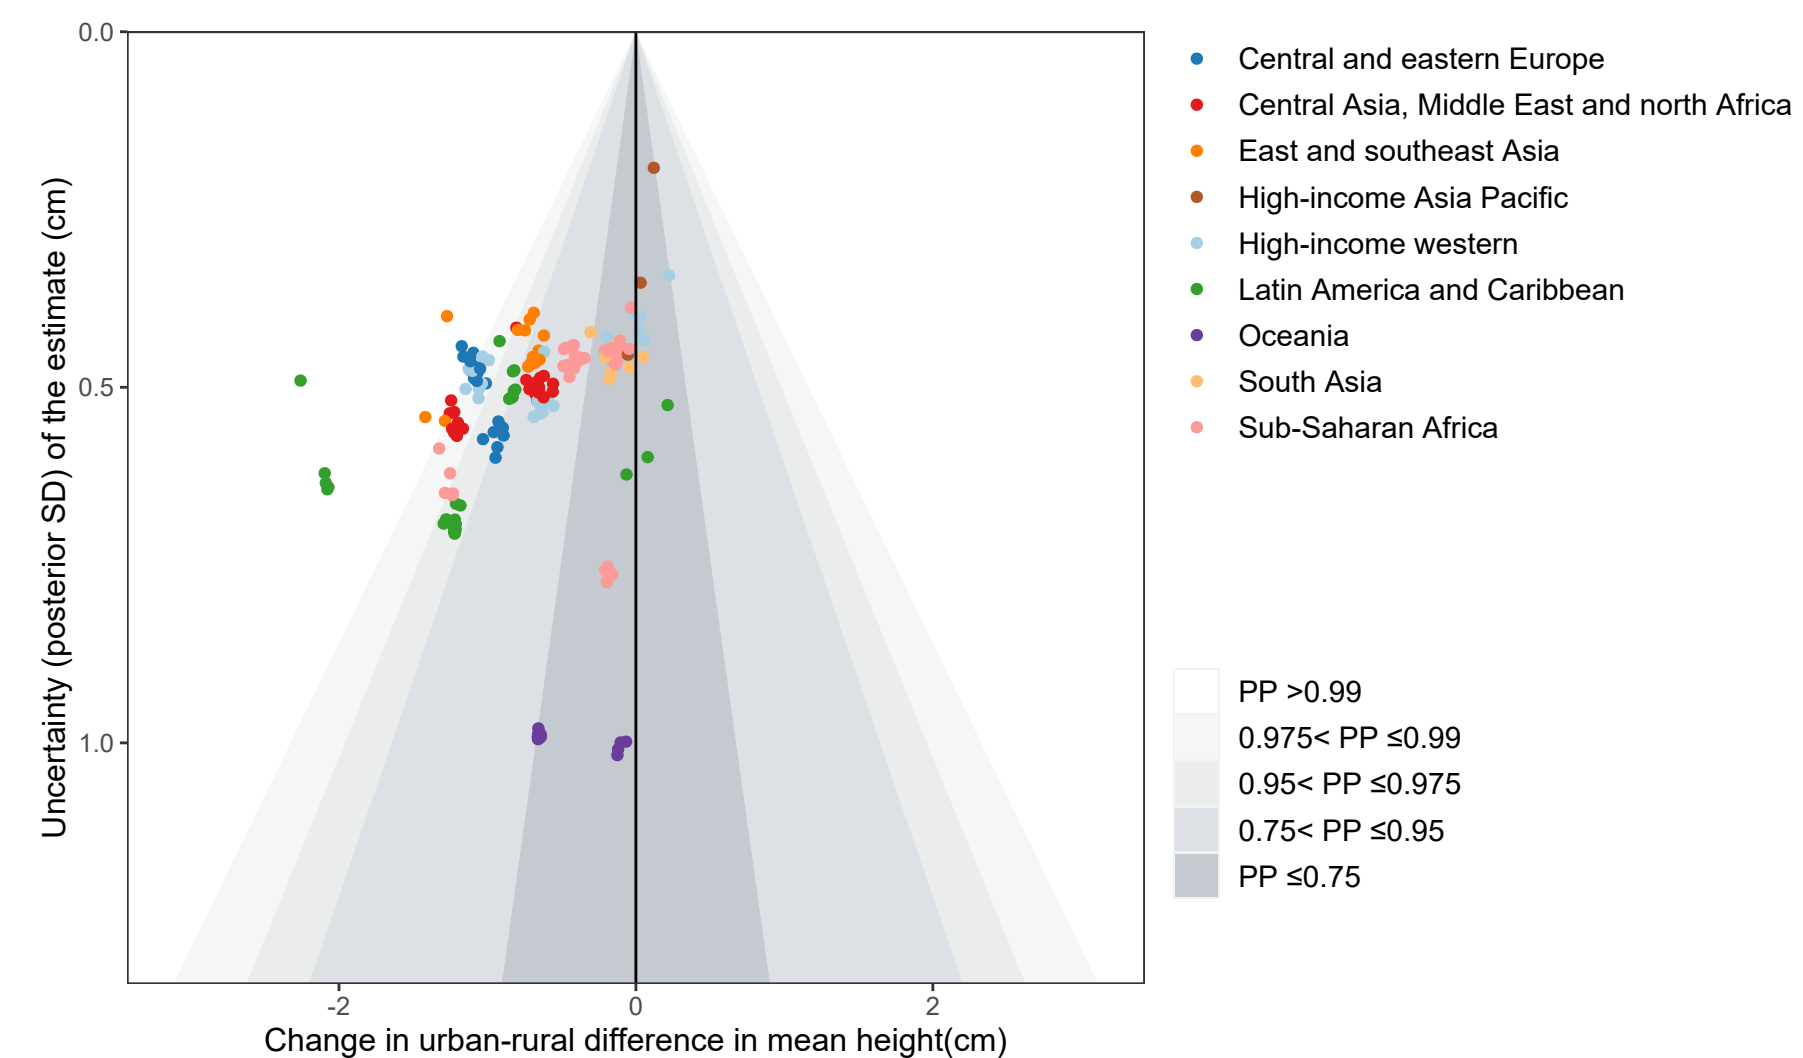

- Central and eastern Europe
- Central Asia, Middle East and north Africa
- East and southeast Asia
- High-income Asia Pacific
- High-income western
- Latin America and Caribbean
- Oceania
- South Asia
- Sub-Saharan Africa

- PP >0.99
- 0.975 < PP ≤ 0.99
- 0.95 < PP ≤ 0.975
- 0.75 < PP ≤ 0.95
- PP ≤ 0.75



### Urban-rural difference in 2020 (boys, age 10)

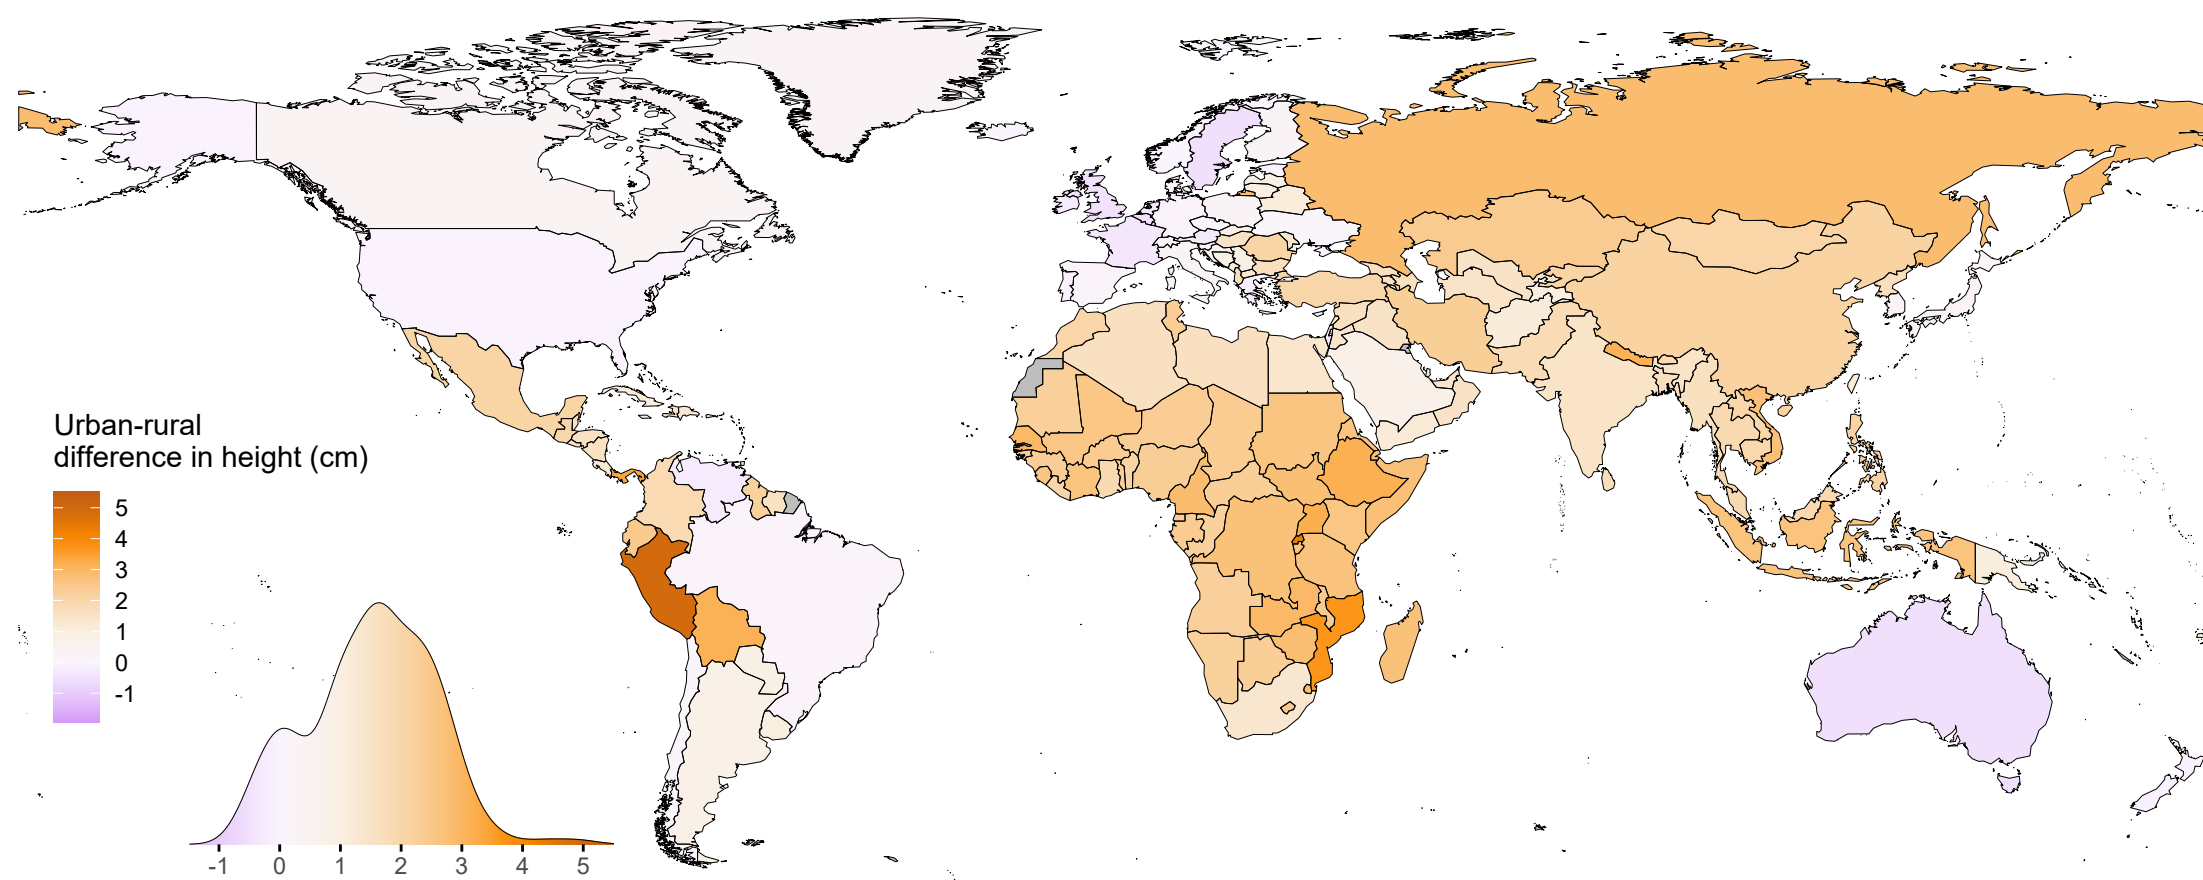

Urban-rural difference in height (cm)

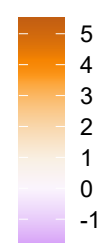

- |                   |                                 |                       |                 |
|-------------------|---------------------------------|-----------------------|-----------------|
| American Samoa    | Fiji                            | Montenegro            | Seychelles      |
| Bahrain           | French Polynesia                | Nauru                 | Solomon Islands |
| Bermuda           | Kiribati                        | Niue                  | Tokelau         |
| Brunei Darussalam | Maldives                        | Palau                 | Tonga           |
| Cape Verde        | Marshall Islands                | Samoa                 | Tuvalu          |
| Comoros           | Mauritius                       | Sao Tome and Principe | Vanuatu         |
| Cook Islands      | Mirconesia, Federated States of |                       |                 |

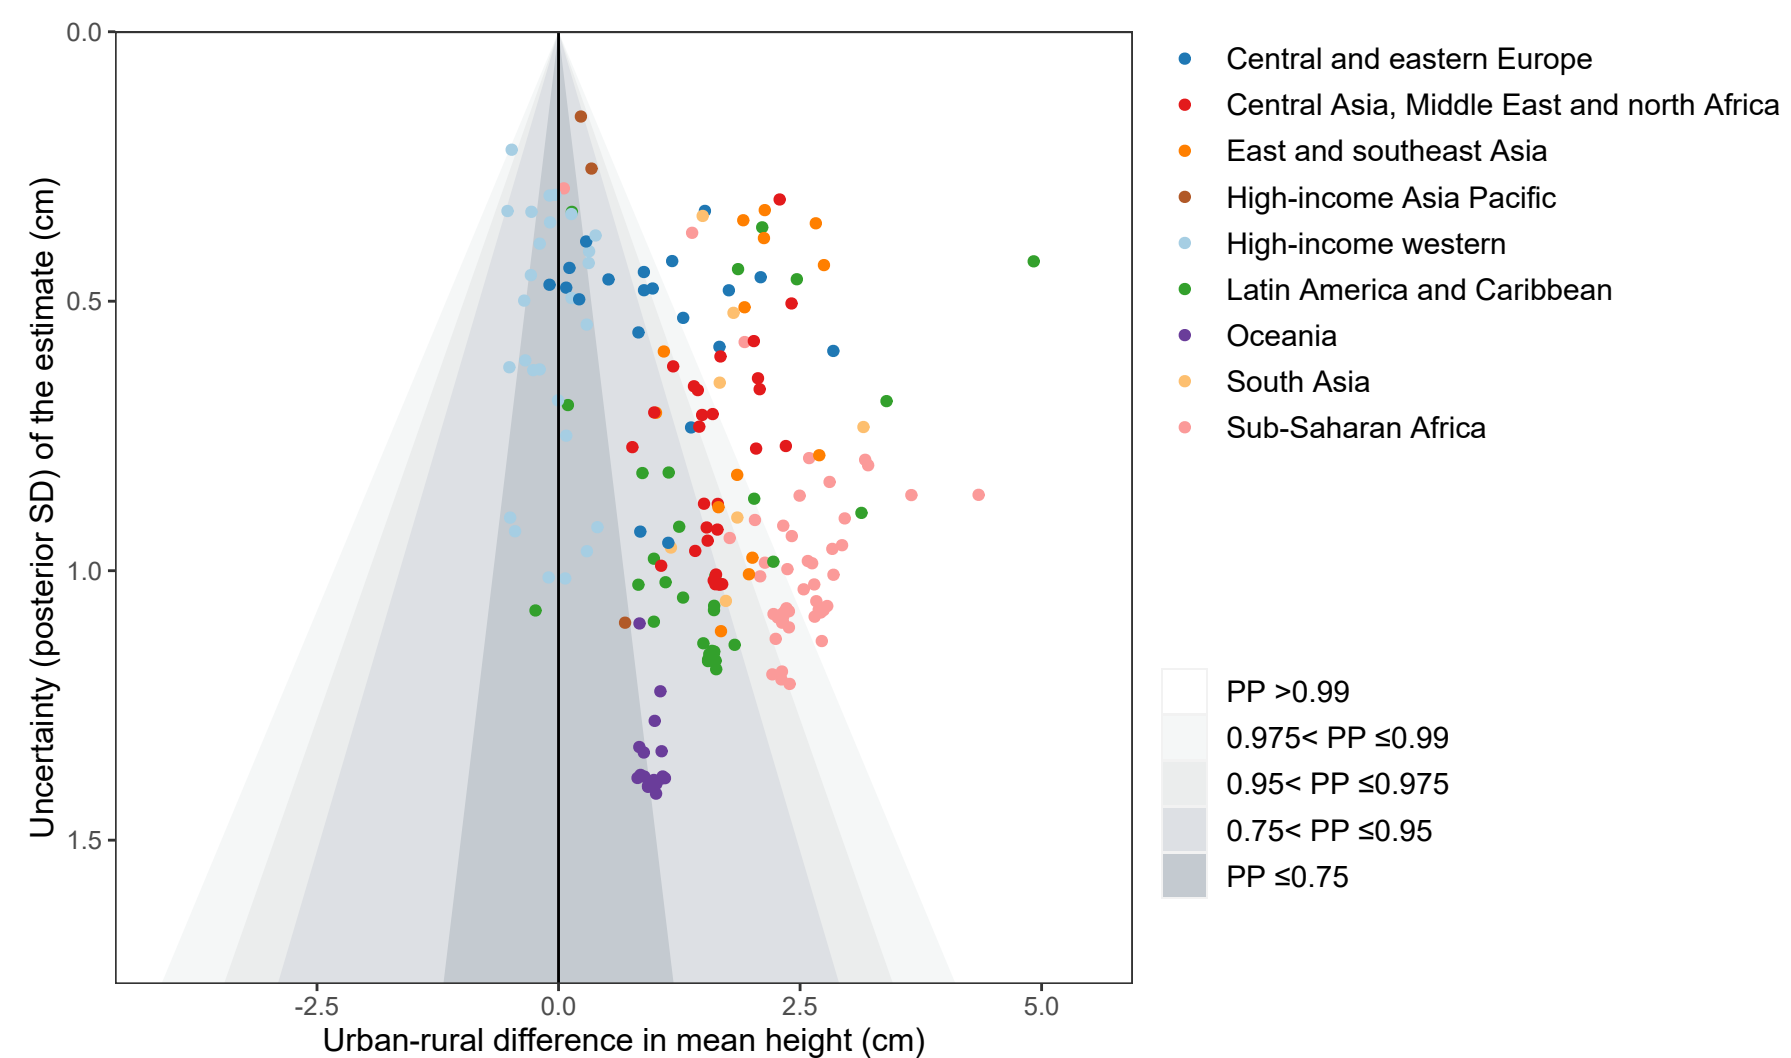

- Central and eastern Europe
- Central Asia, Middle East and north Africa
- East and southeast Asia
- High-income Asia Pacific
- High-income western
- Latin America and Caribbean
- Oceania
- South Asia
- Sub-Saharan Africa

- PP > 0.99
- 0.975 < PP ≤ 0.99
- 0.95 < PP ≤ 0.975
- 0.75 < PP ≤ 0.95
- PP ≤ 0.75

### Change 1990-2020 (boys, age 10)

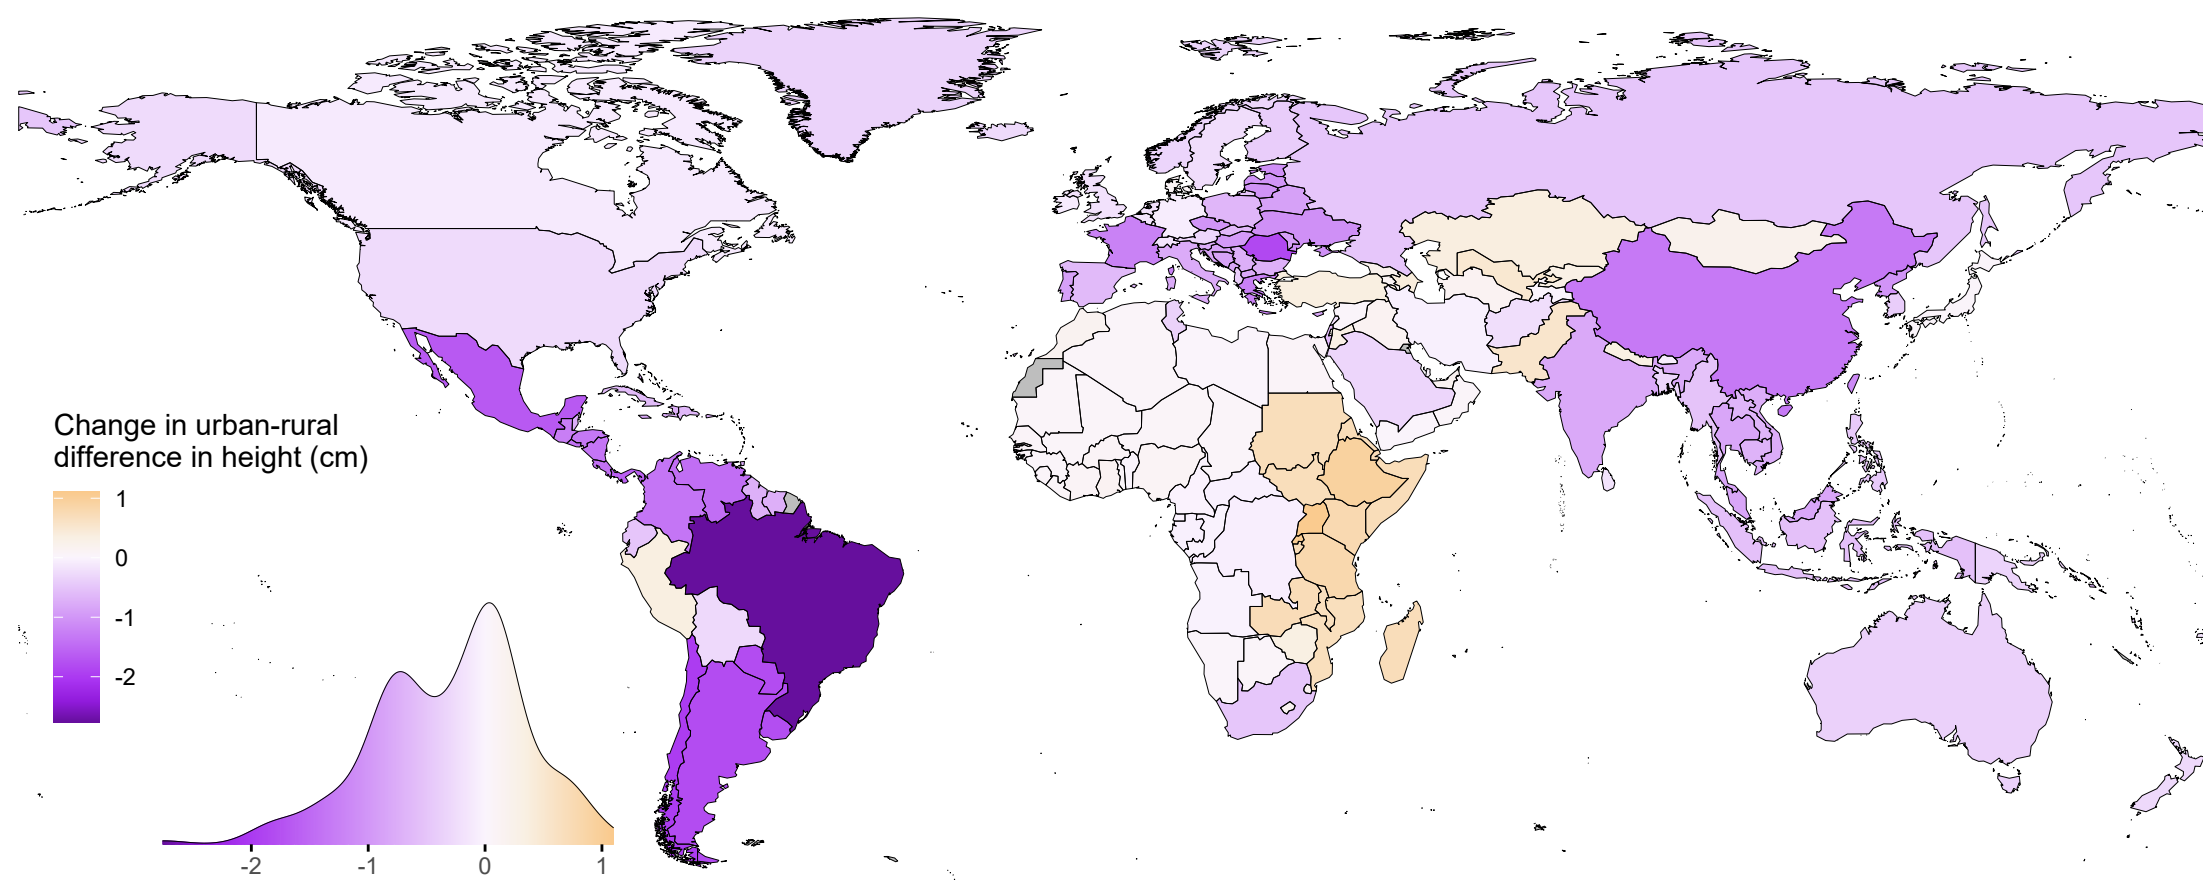

Change in urban-rural difference in height (cm)

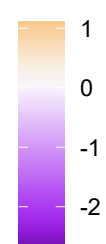

- |                   |                                 |                       |                 |
|-------------------|---------------------------------|-----------------------|-----------------|
| American Samoa    | Fiji                            | Montenegro            | Seychelles      |
| Bahrain           | French Polynesia                | Nauru                 | Solomon Islands |
| Bermuda           | Kiribati                        | Niue                  | Tokelau         |
| Brunei Darussalam | Maldives                        | Palau                 | Tonga           |
| Cape Verde        | Marshall Islands                | Samoa                 | Tuvalu          |
| Comoros           | Mauritius                       | Sao Tome and Principe | Vanuatu         |
| Cook Islands      | Mirconesia, Federated States of |                       |                 |

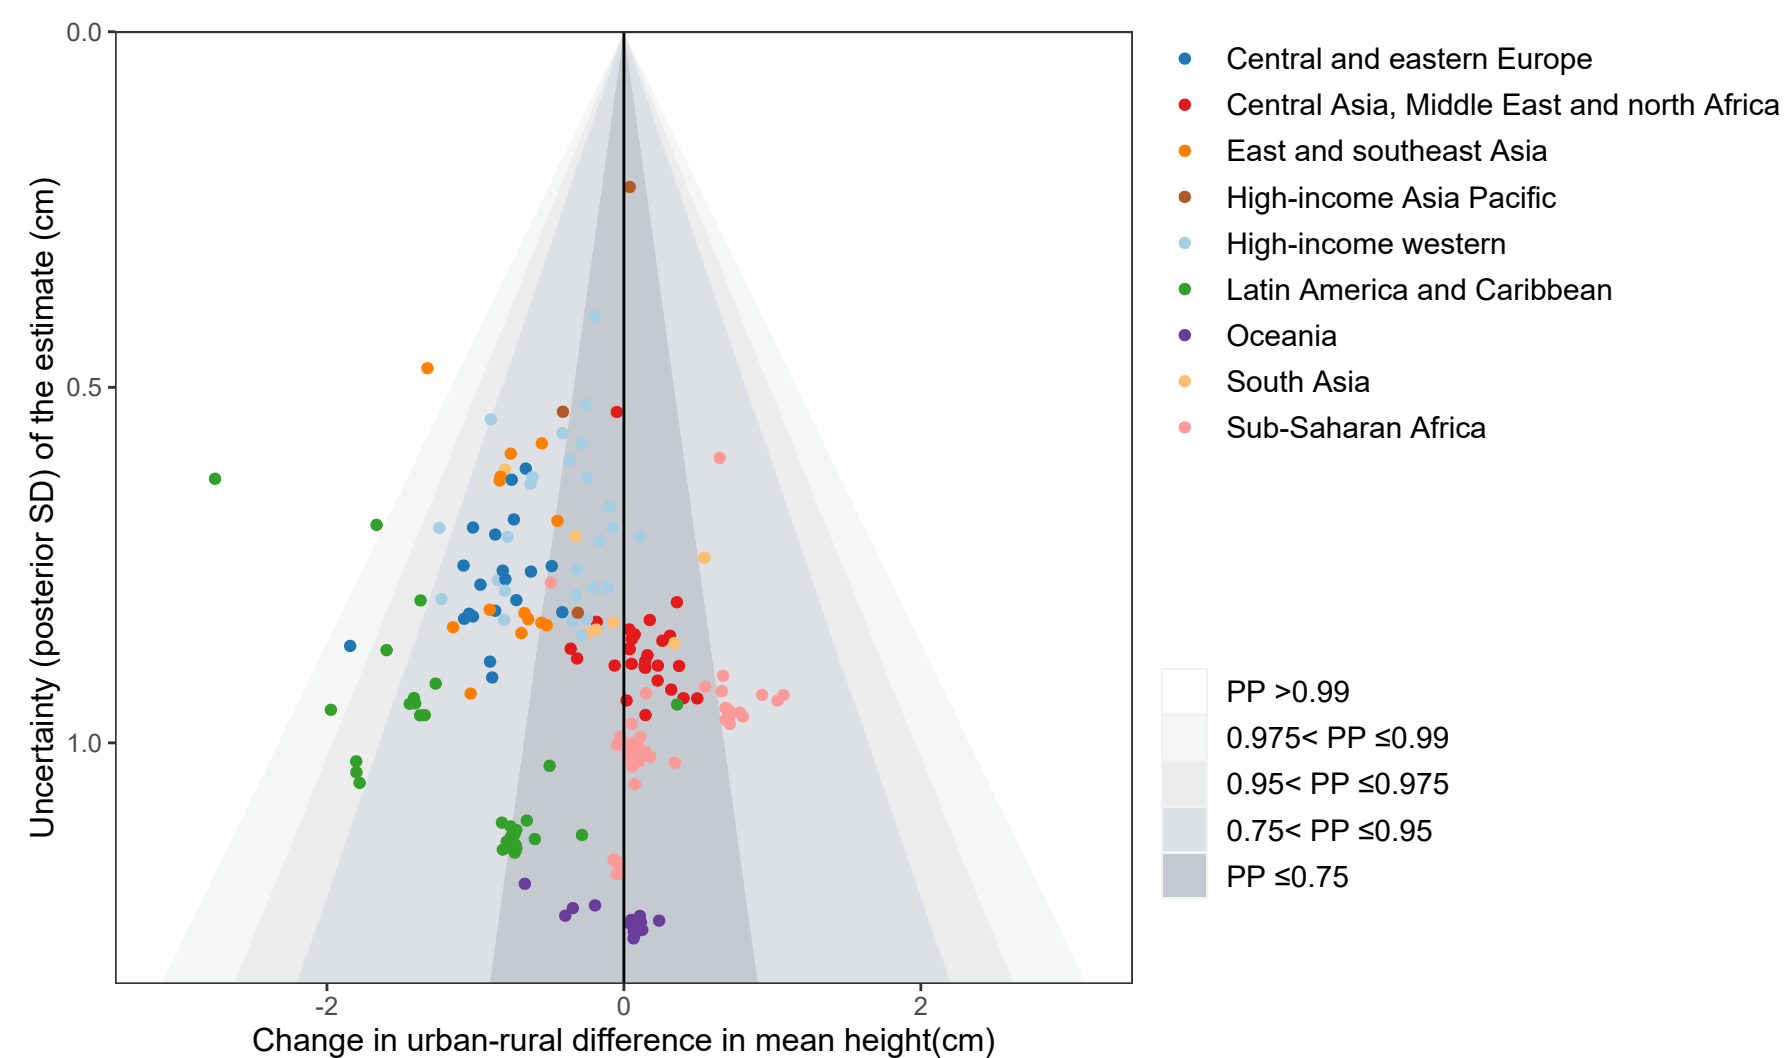

- Central and eastern Europe
- Central Asia, Middle East and north Africa
- East and southeast Asia
- High-income Asia Pacific
- High-income western
- Latin America and Caribbean
- Oceania
- South Asia
- Sub-Saharan Africa

- PP > 0.99
- 0.975 < PP ≤ 0.99
- 0.95 < PP ≤ 0.975
- 0.75 < PP ≤ 0.95
- PP ≤ 0.75

### Urban-rural difference in 2020 (girls, age 15)

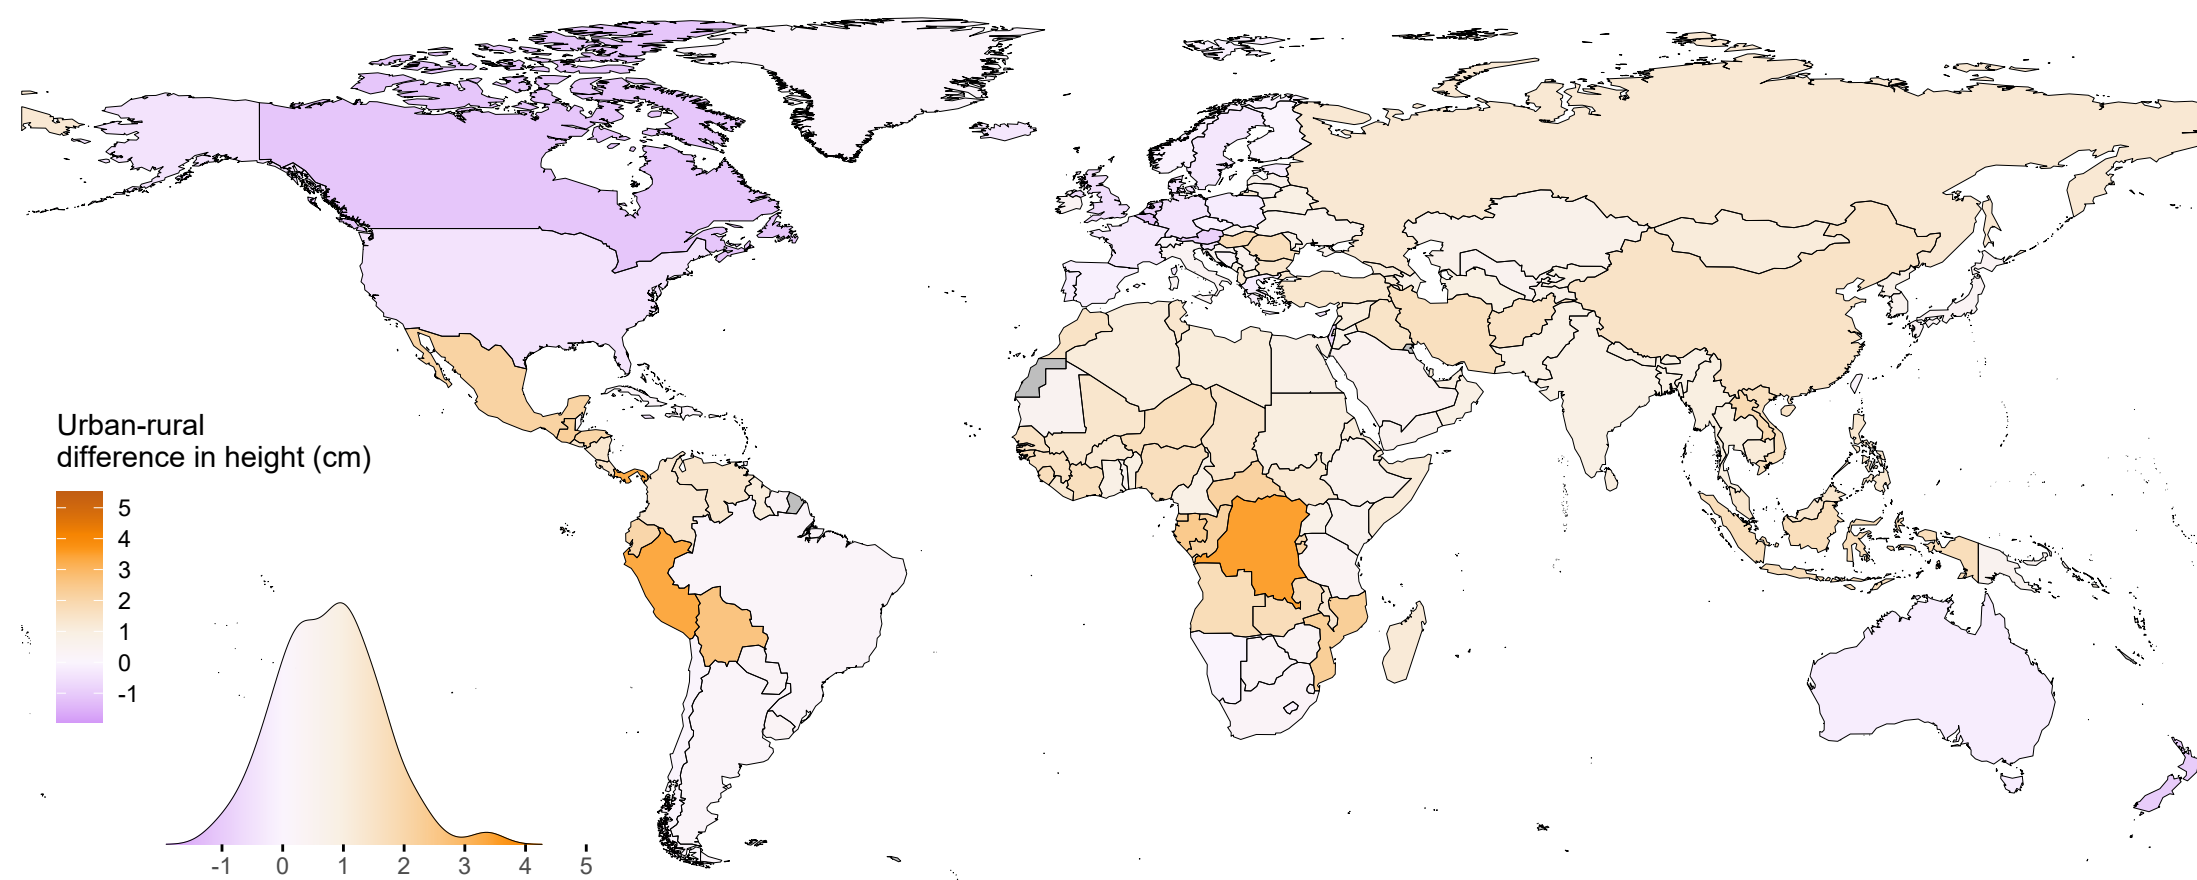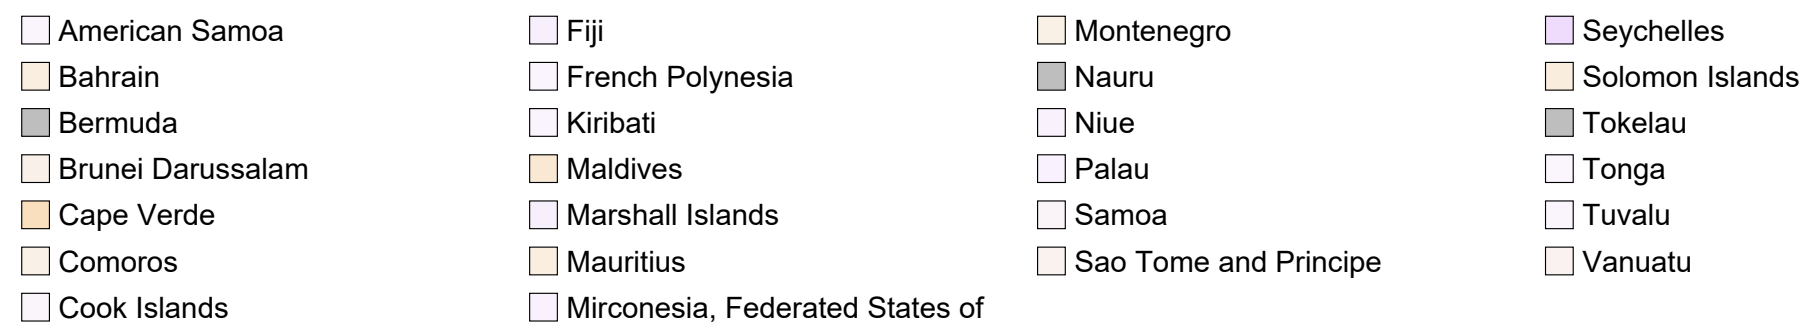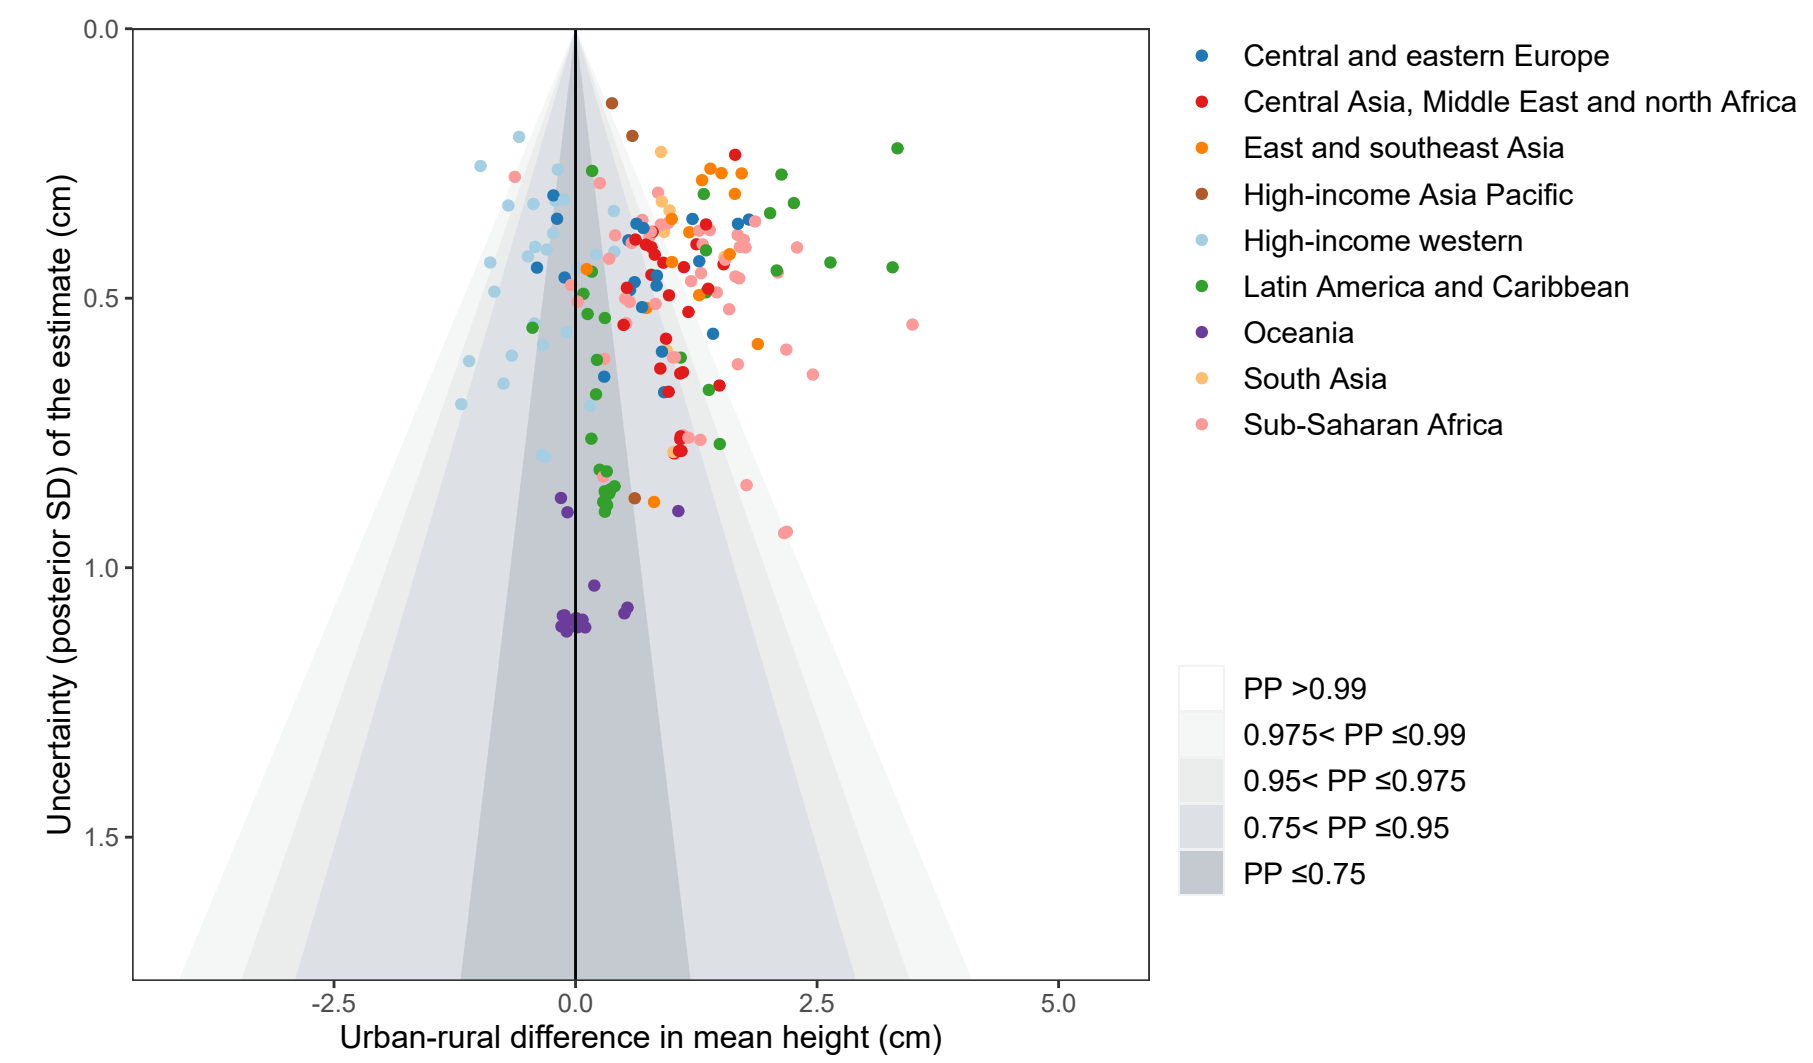

### Change 1990-2020 (girls, age 15)

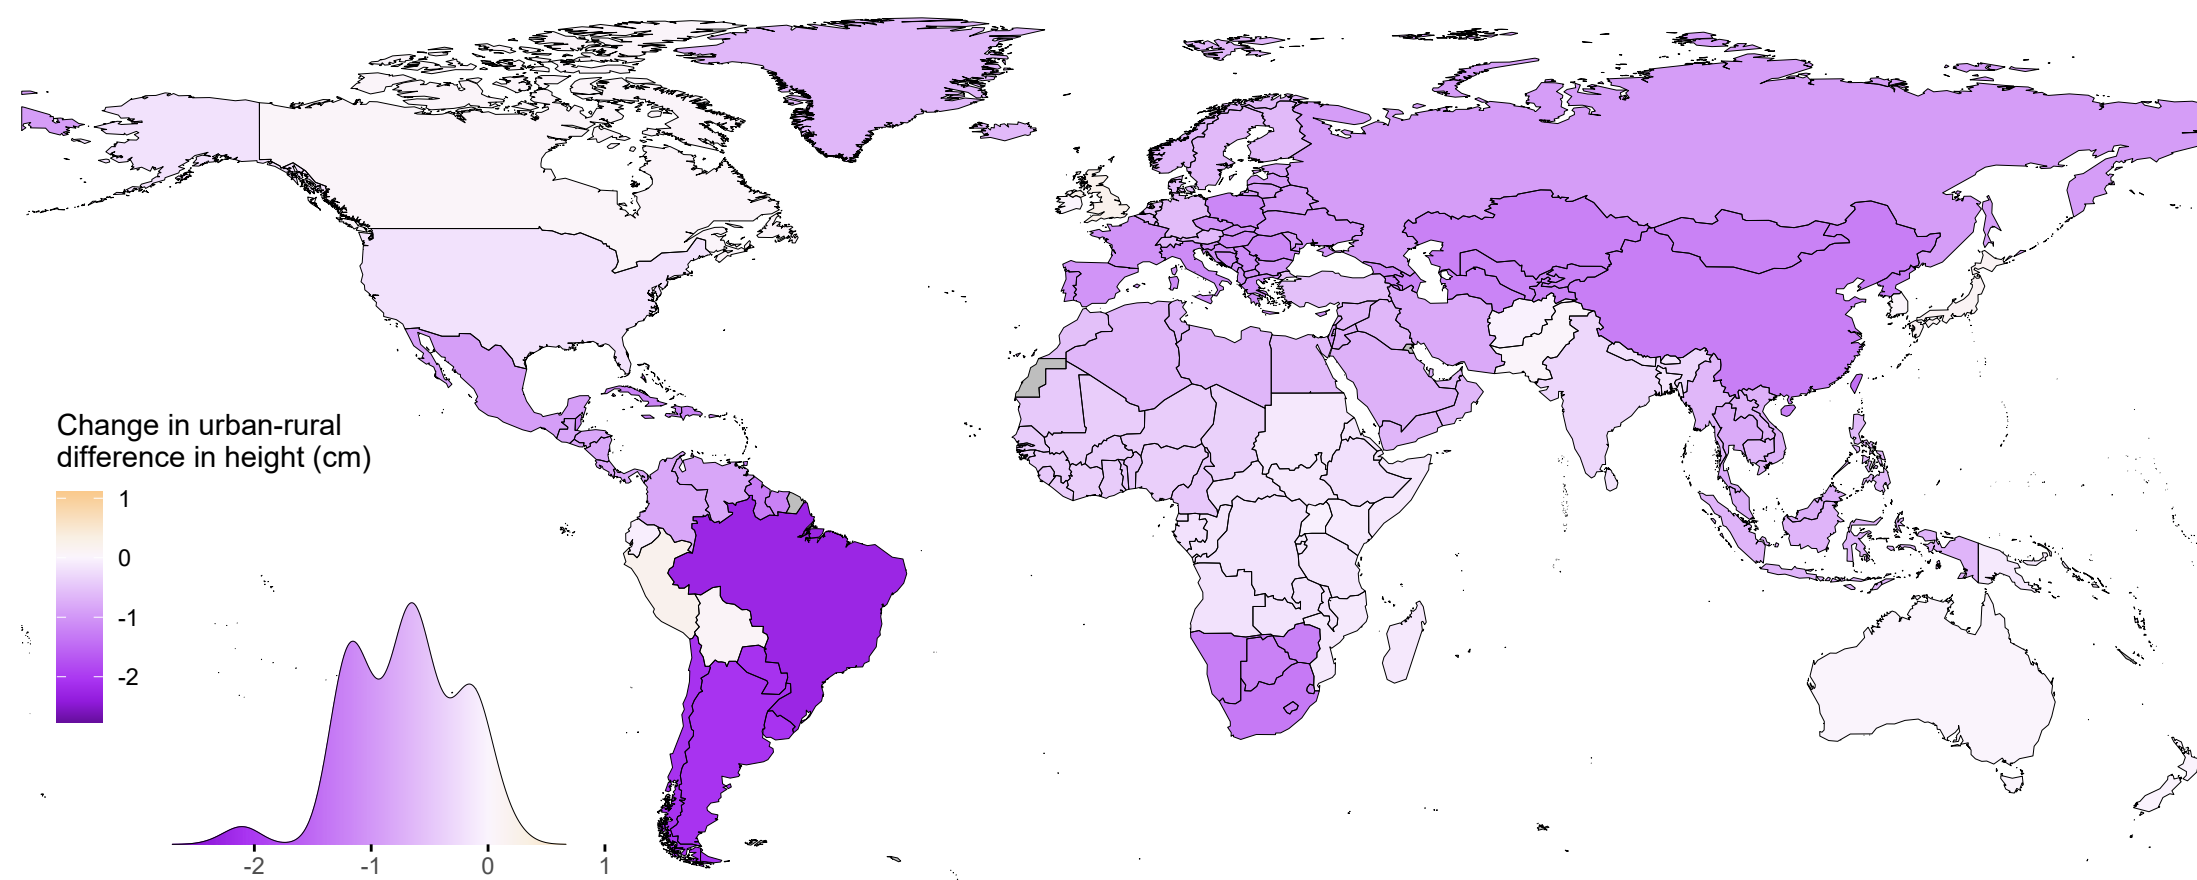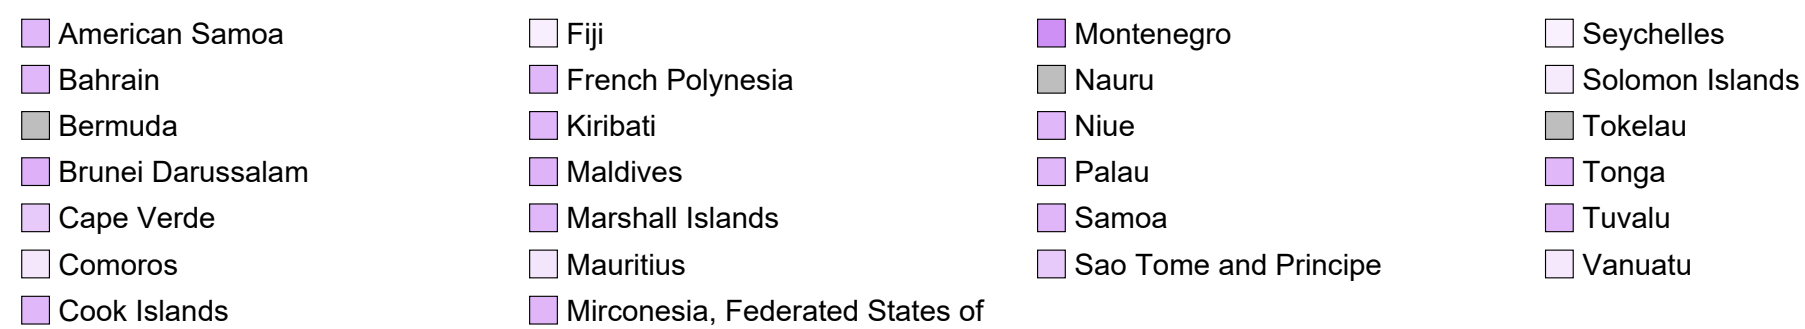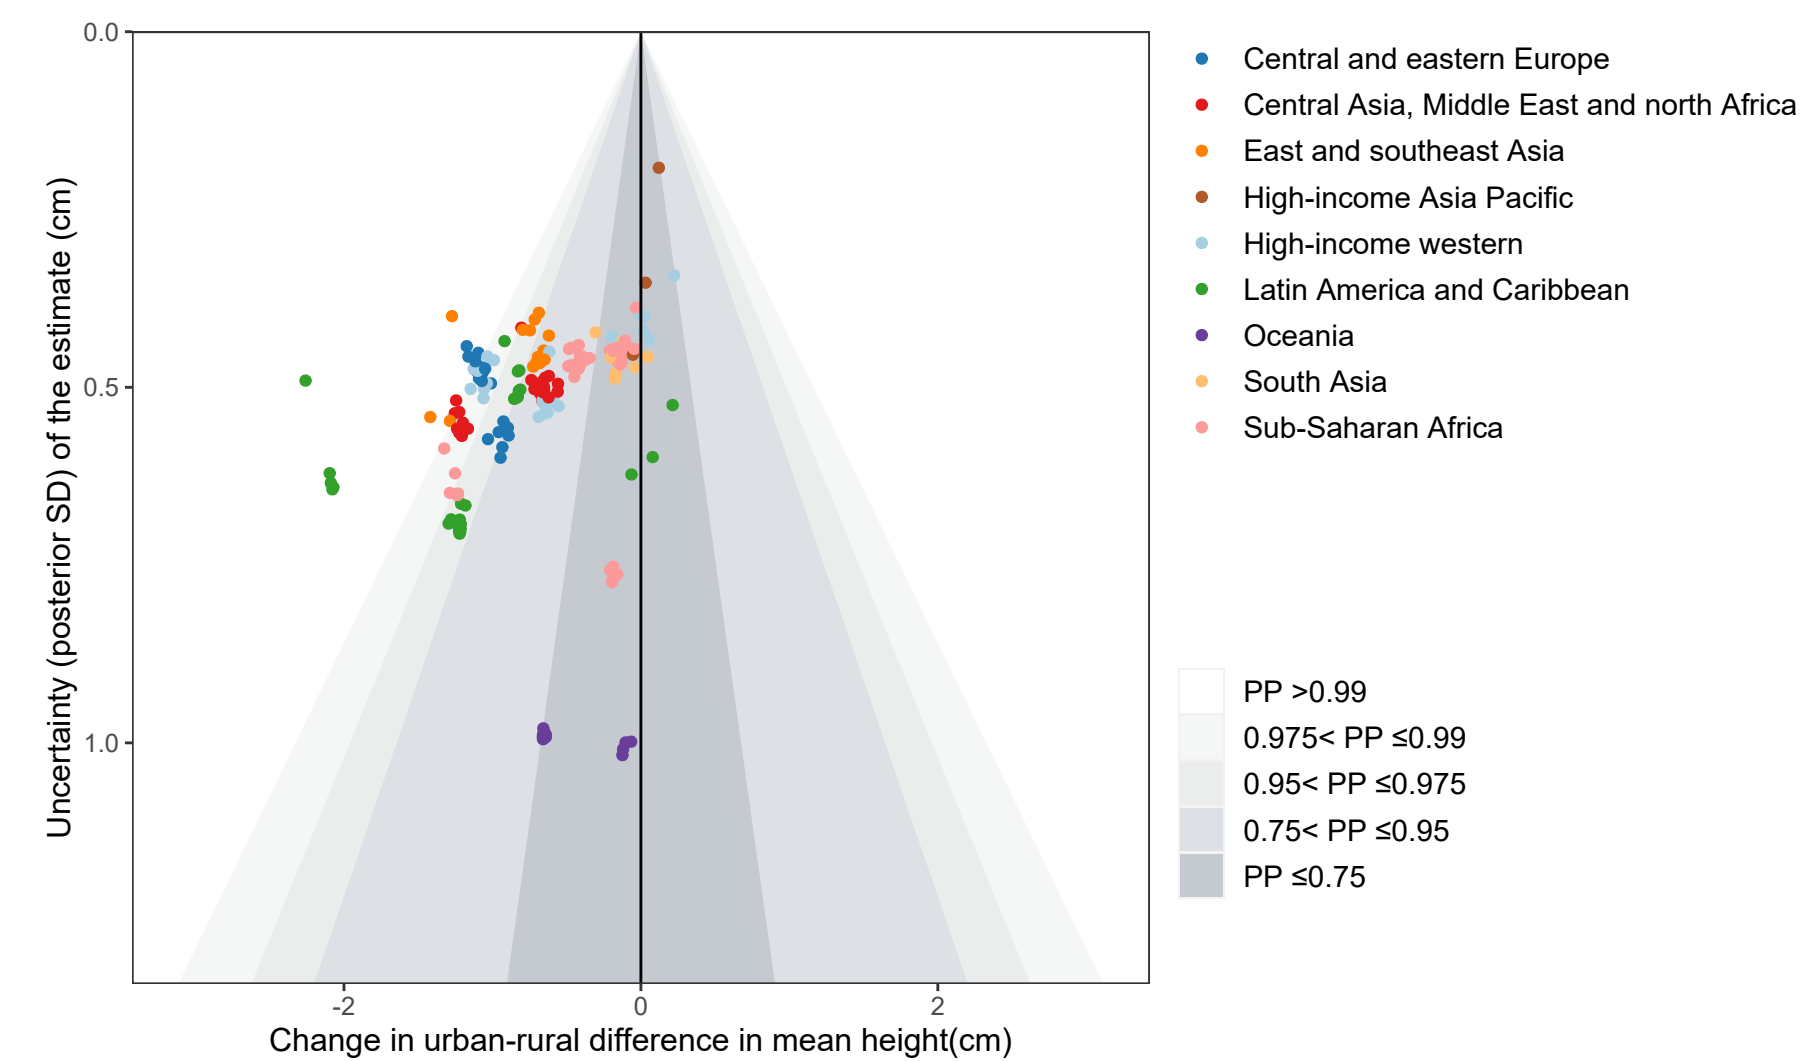



### Urban-rural difference in 2020 (boys, age 15)

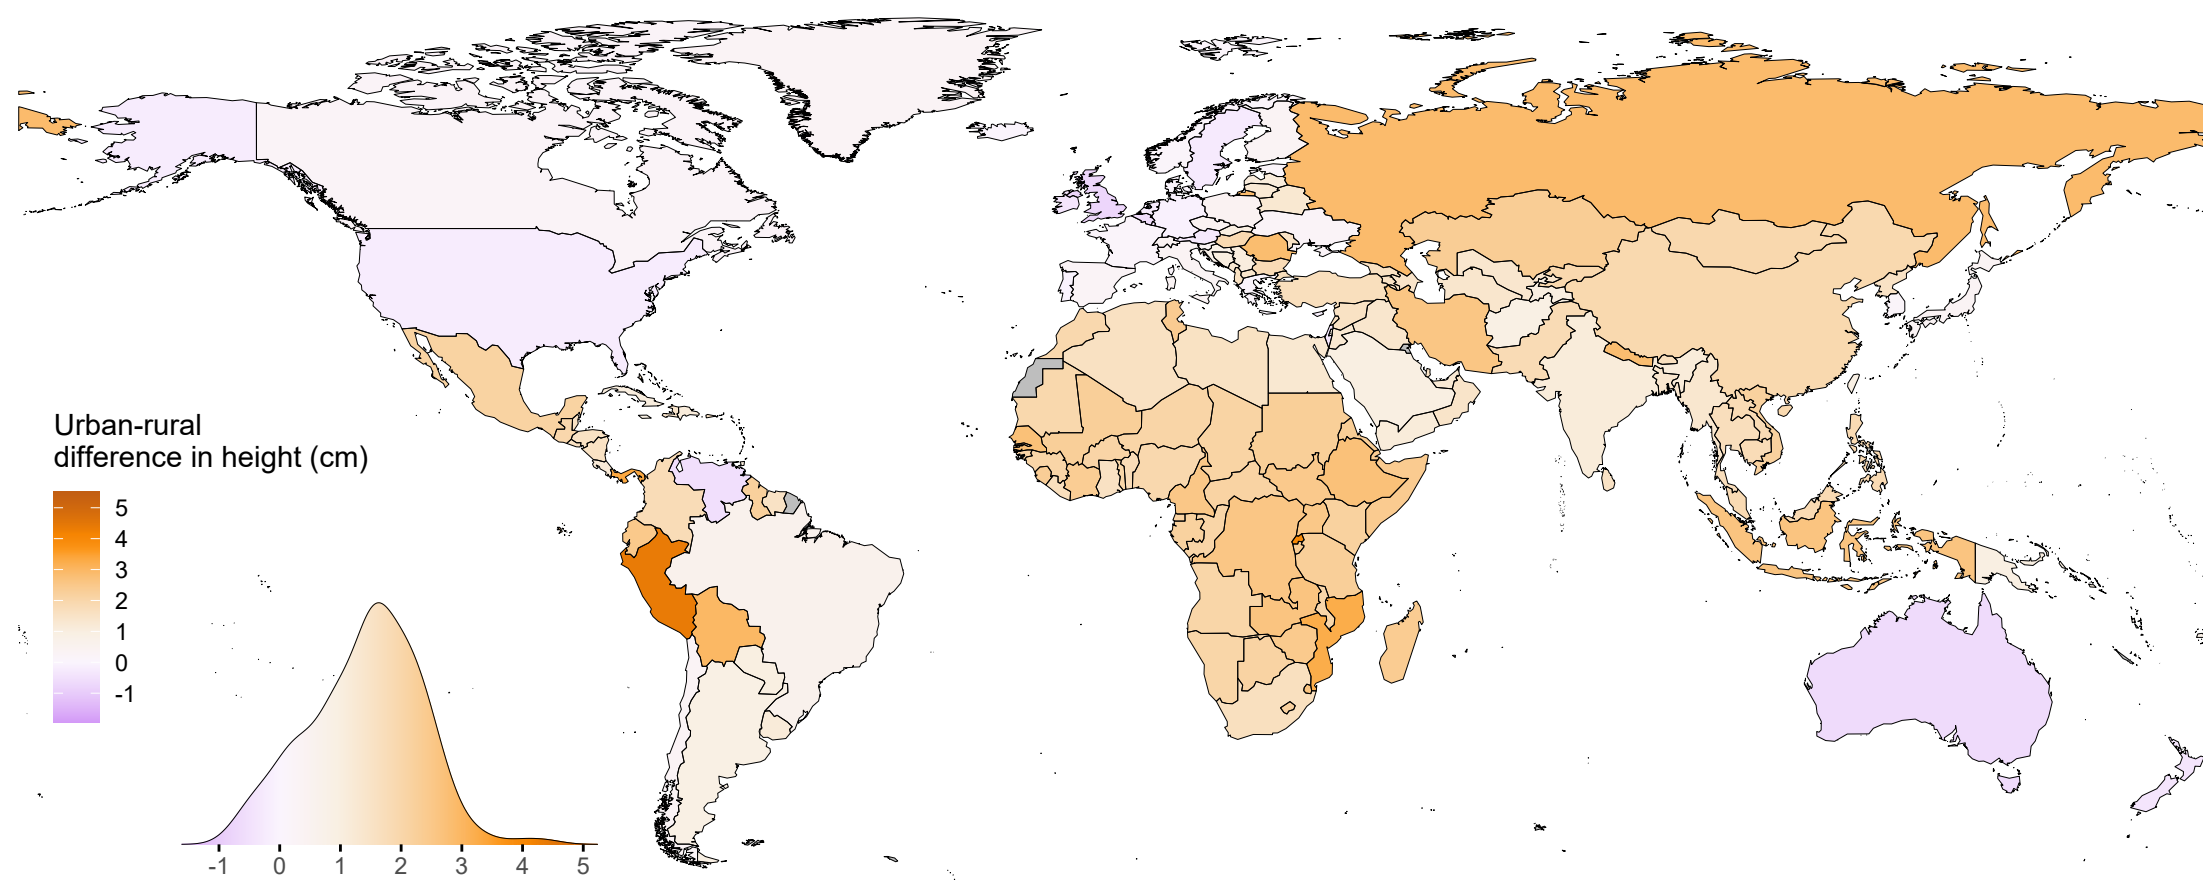

Urban-rural difference in height (cm)

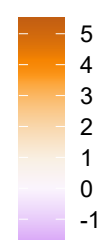

- |                                            |                                                          |                                                |                                          |
|--------------------------------------------|----------------------------------------------------------|------------------------------------------------|------------------------------------------|
| <input type="checkbox"/> American Samoa    | <input type="checkbox"/> Fiji                            | <input type="checkbox"/> Montenegro            | <input type="checkbox"/> Seychelles      |
| <input type="checkbox"/> Bahrain           | <input type="checkbox"/> French Polynesia                | <input type="checkbox"/> Nauru                 | <input type="checkbox"/> Solomon Islands |
| <input type="checkbox"/> Bermuda           | <input type="checkbox"/> Kiribati                        | <input type="checkbox"/> Niue                  | <input type="checkbox"/> Tokelau         |
| <input type="checkbox"/> Brunei Darussalam | <input type="checkbox"/> Maldives                        | <input type="checkbox"/> Palau                 | <input type="checkbox"/> Tonga           |
| <input type="checkbox"/> Cape Verde        | <input type="checkbox"/> Marshall Islands                | <input type="checkbox"/> Samoa                 | <input type="checkbox"/> Tuvalu          |
| <input type="checkbox"/> Comoros           | <input type="checkbox"/> Mauritius                       | <input type="checkbox"/> Sao Tome and Principe | <input type="checkbox"/> Vanuatu         |
| <input type="checkbox"/> Cook Islands      | <input type="checkbox"/> Mirconesia, Federated States of |                                                |                                          |

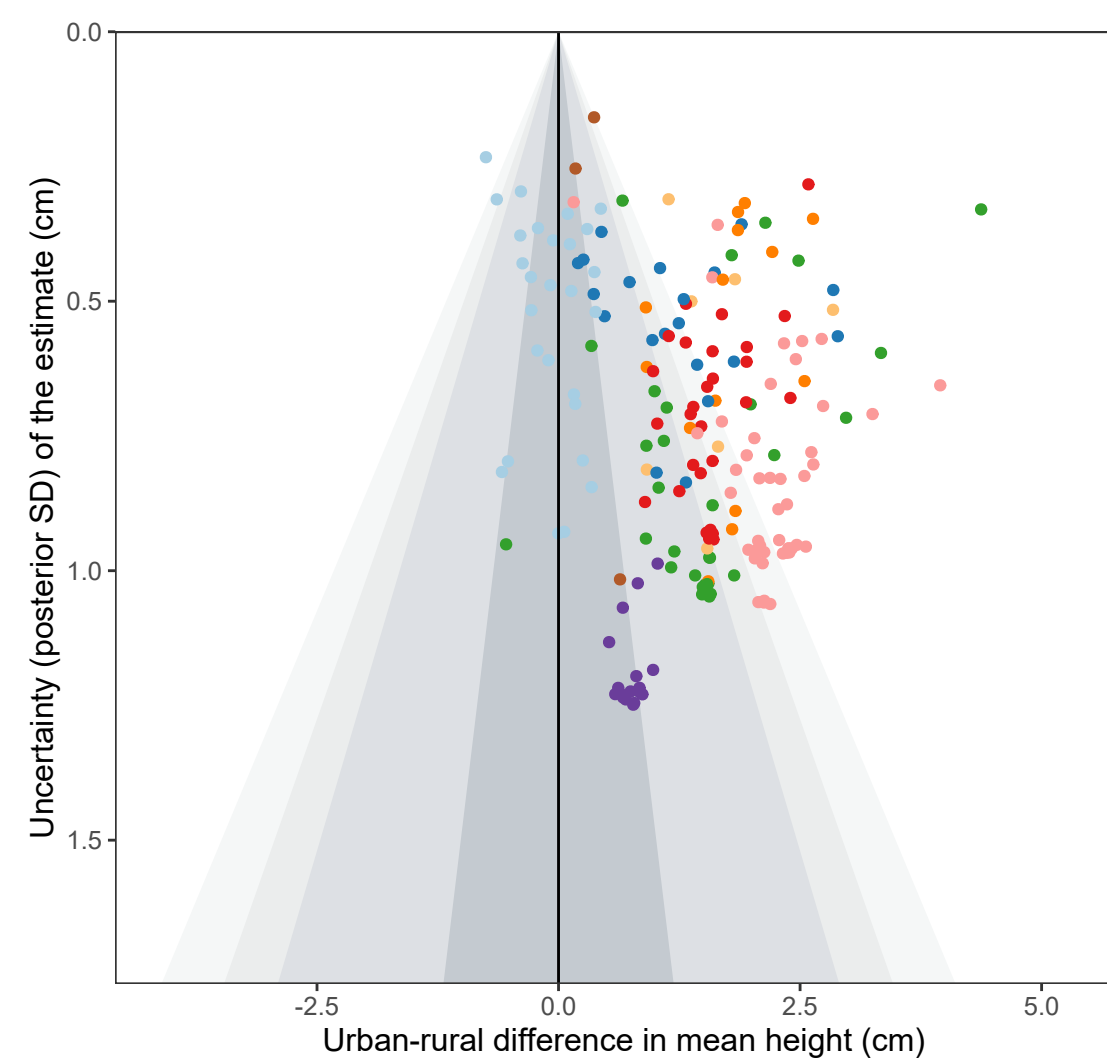

- Central and eastern Europe
- Central Asia, Middle East and north Africa
- East and southeast Asia
- High-income Asia Pacific
- High-income western
- Latin America and Caribbean
- Oceania
- South Asia
- Sub-Saharan Africa

- PP > 0.99
- 0.975 < PP ≤ 0.99
- 0.95 < PP ≤ 0.975
- 0.75 < PP ≤ 0.95
- PP ≤ 0.75

### Change 1990-2020 (boys, age 15)



Change in urban-rural difference in height (cm)

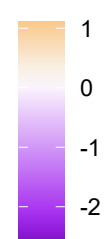

- |                                            |                                                          |                                                |                                          |
|--------------------------------------------|----------------------------------------------------------|------------------------------------------------|------------------------------------------|
| <input type="checkbox"/> American Samoa    | <input type="checkbox"/> Fiji                            | <input type="checkbox"/> Montenegro            | <input type="checkbox"/> Seychelles      |
| <input type="checkbox"/> Bahrain           | <input type="checkbox"/> French Polynesia                | <input type="checkbox"/> Nauru                 | <input type="checkbox"/> Solomon Islands |
| <input type="checkbox"/> Bermuda           | <input type="checkbox"/> Kiribati                        | <input type="checkbox"/> Niue                  | <input type="checkbox"/> Tokelau         |
| <input type="checkbox"/> Brunei Darussalam | <input type="checkbox"/> Maldives                        | <input type="checkbox"/> Palau                 | <input type="checkbox"/> Tonga           |
| <input type="checkbox"/> Cape Verde        | <input type="checkbox"/> Marshall Islands                | <input type="checkbox"/> Samoa                 | <input type="checkbox"/> Tuvalu          |
| <input type="checkbox"/> Comoros           | <input type="checkbox"/> Mauritius                       | <input type="checkbox"/> Sao Tome and Principe | <input type="checkbox"/> Vanuatu         |
| <input type="checkbox"/> Cook Islands      | <input type="checkbox"/> Mirconesia, Federated States of |                                                |                                          |

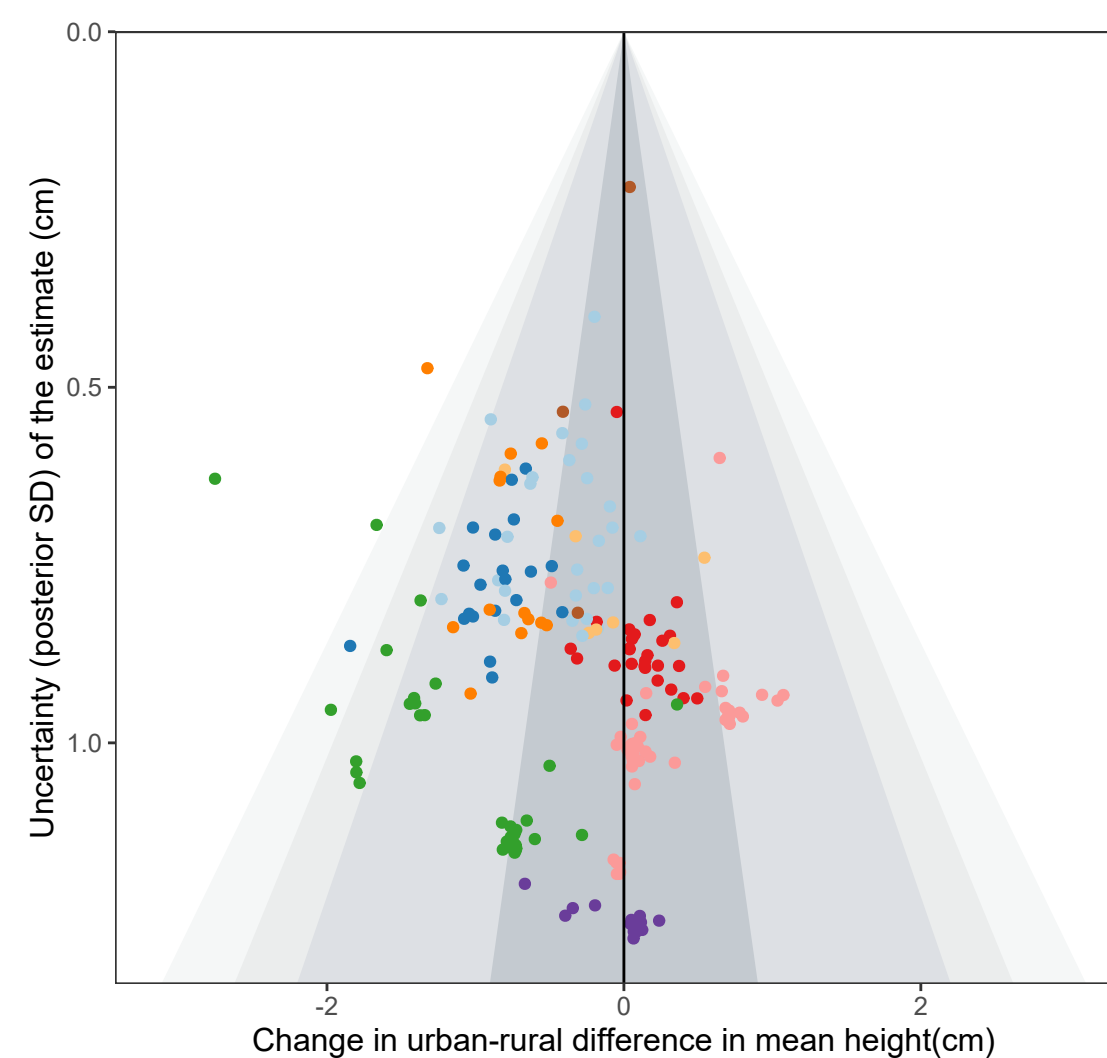

- Central and eastern Europe
- Central Asia, Middle East and north Africa
- East and southeast Asia
- High-income Asia Pacific
- High-income western
- Latin America and Caribbean
- Oceania
- South Asia
- Sub-Saharan Africa

- PP > 0.99
- 0.975 < PP ≤ 0.99
- 0.95 < PP ≤ 0.975
- 0.75 < PP ≤ 0.95
- PP ≤ 0.75

### Urban-rural difference in 2020 (girls, age 19)

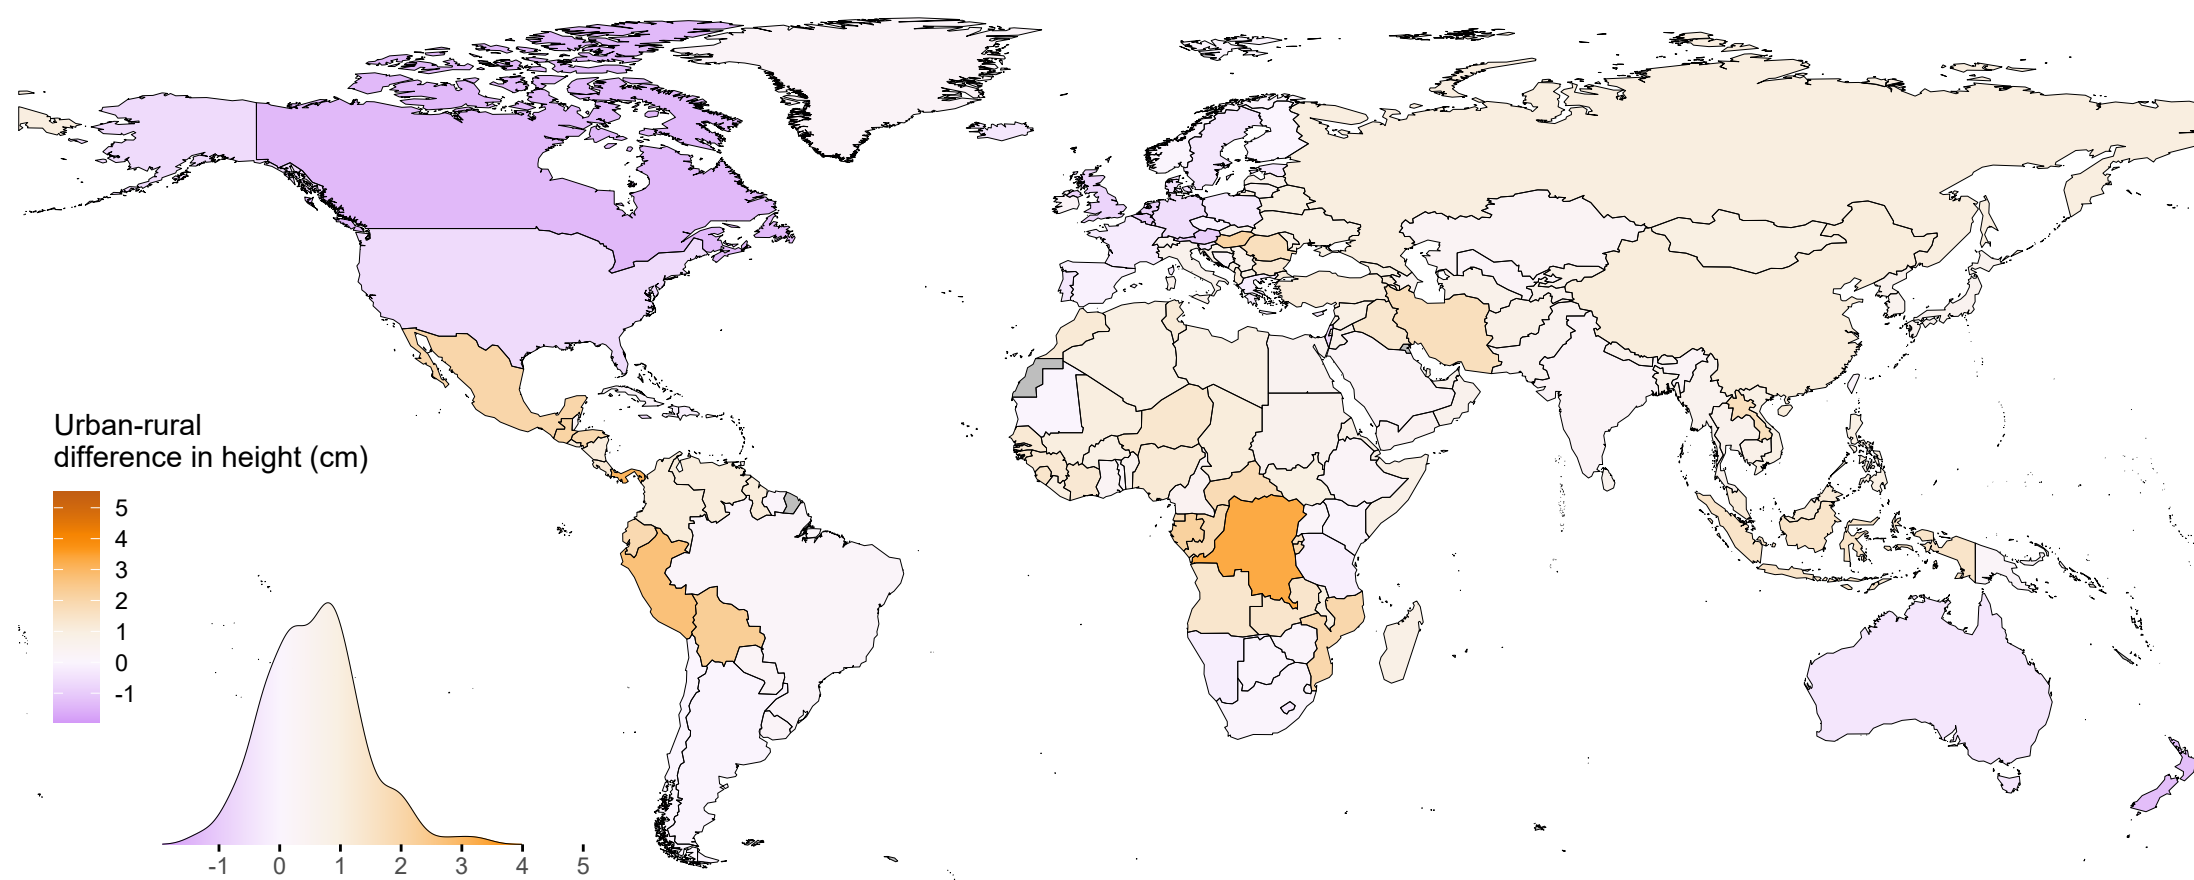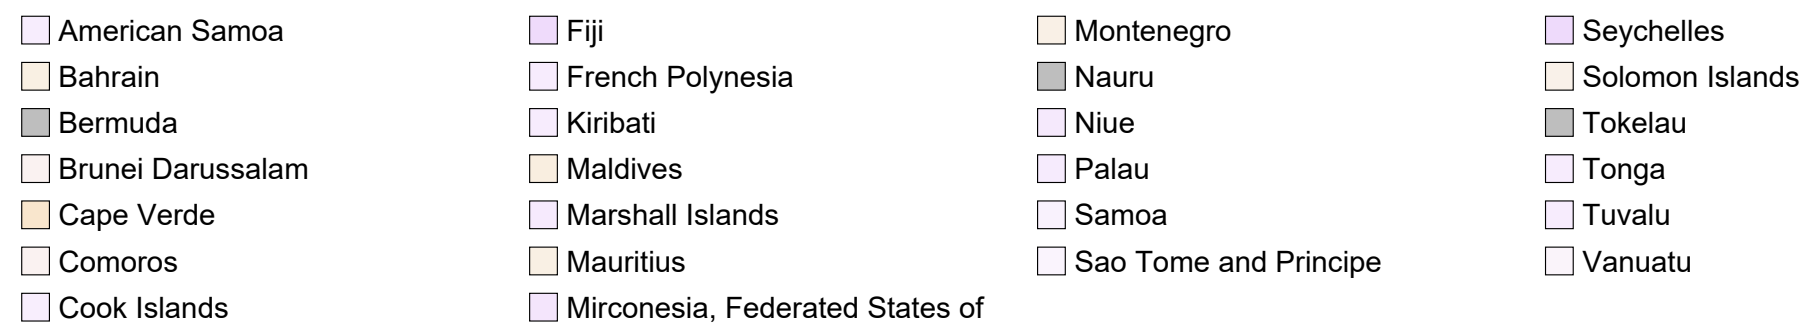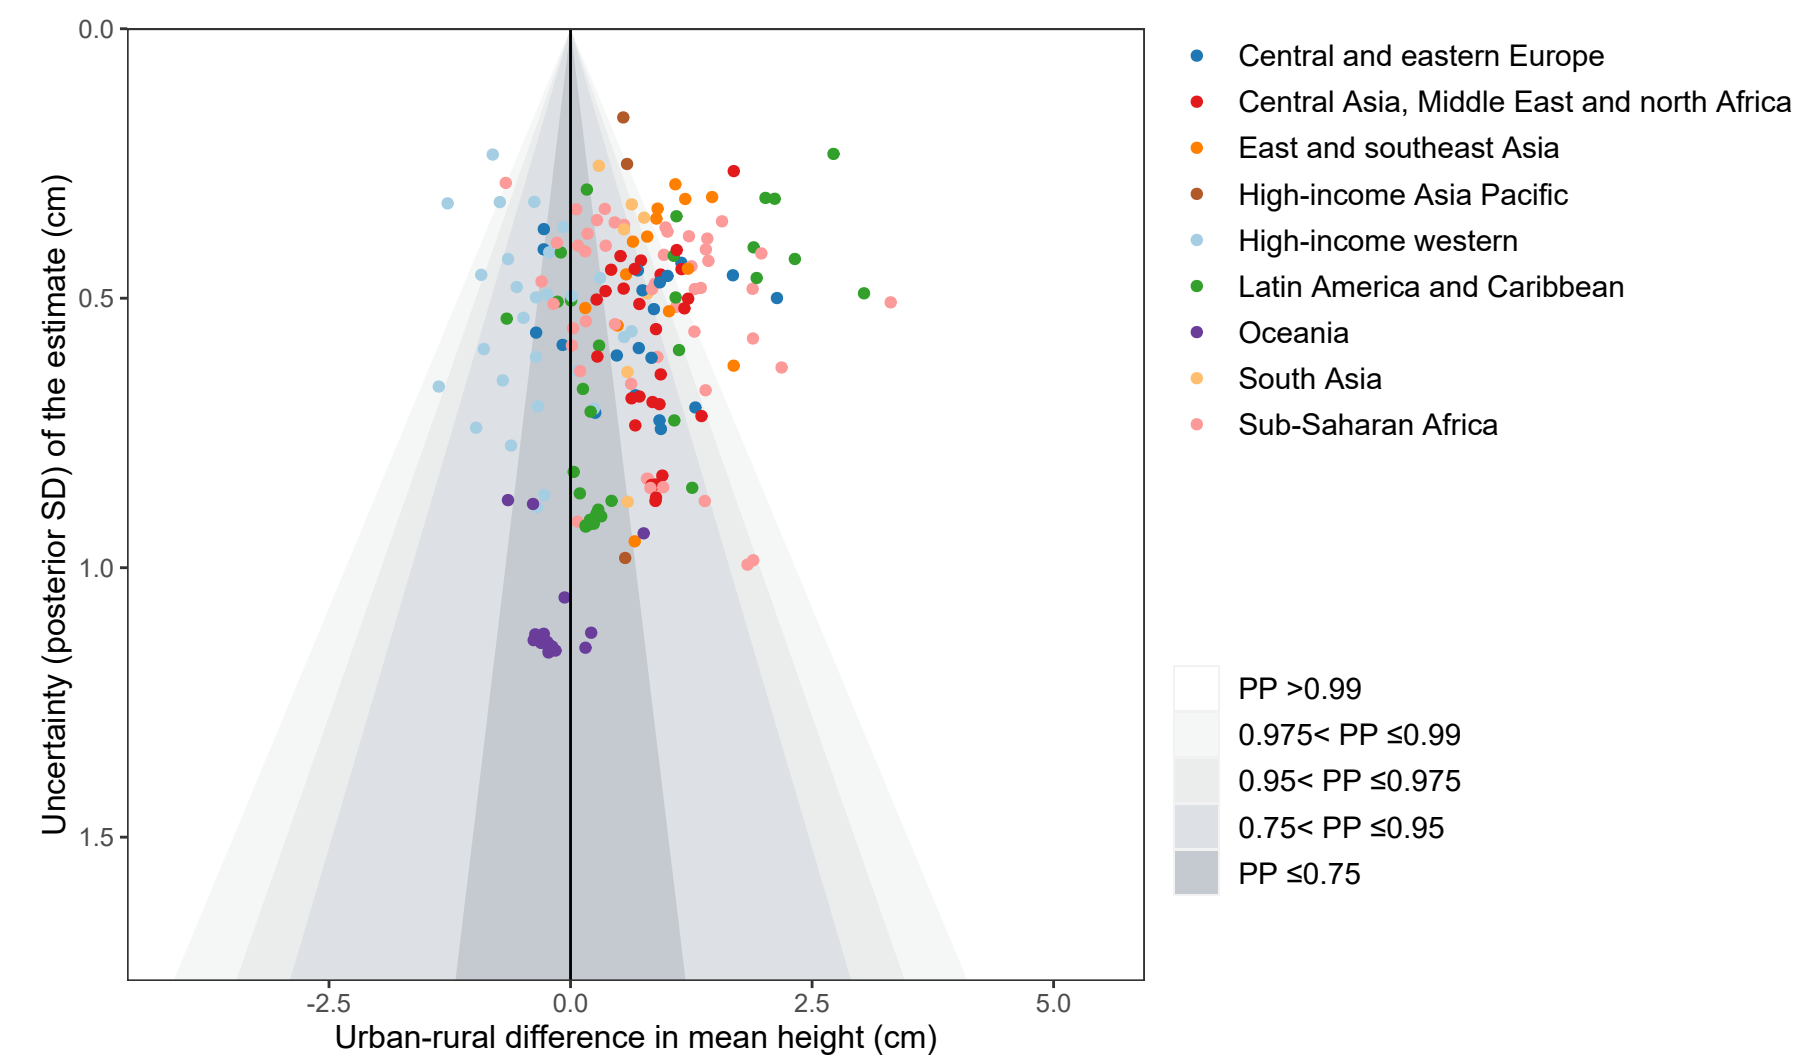

### Change 1990-2020 (girls, age 19)

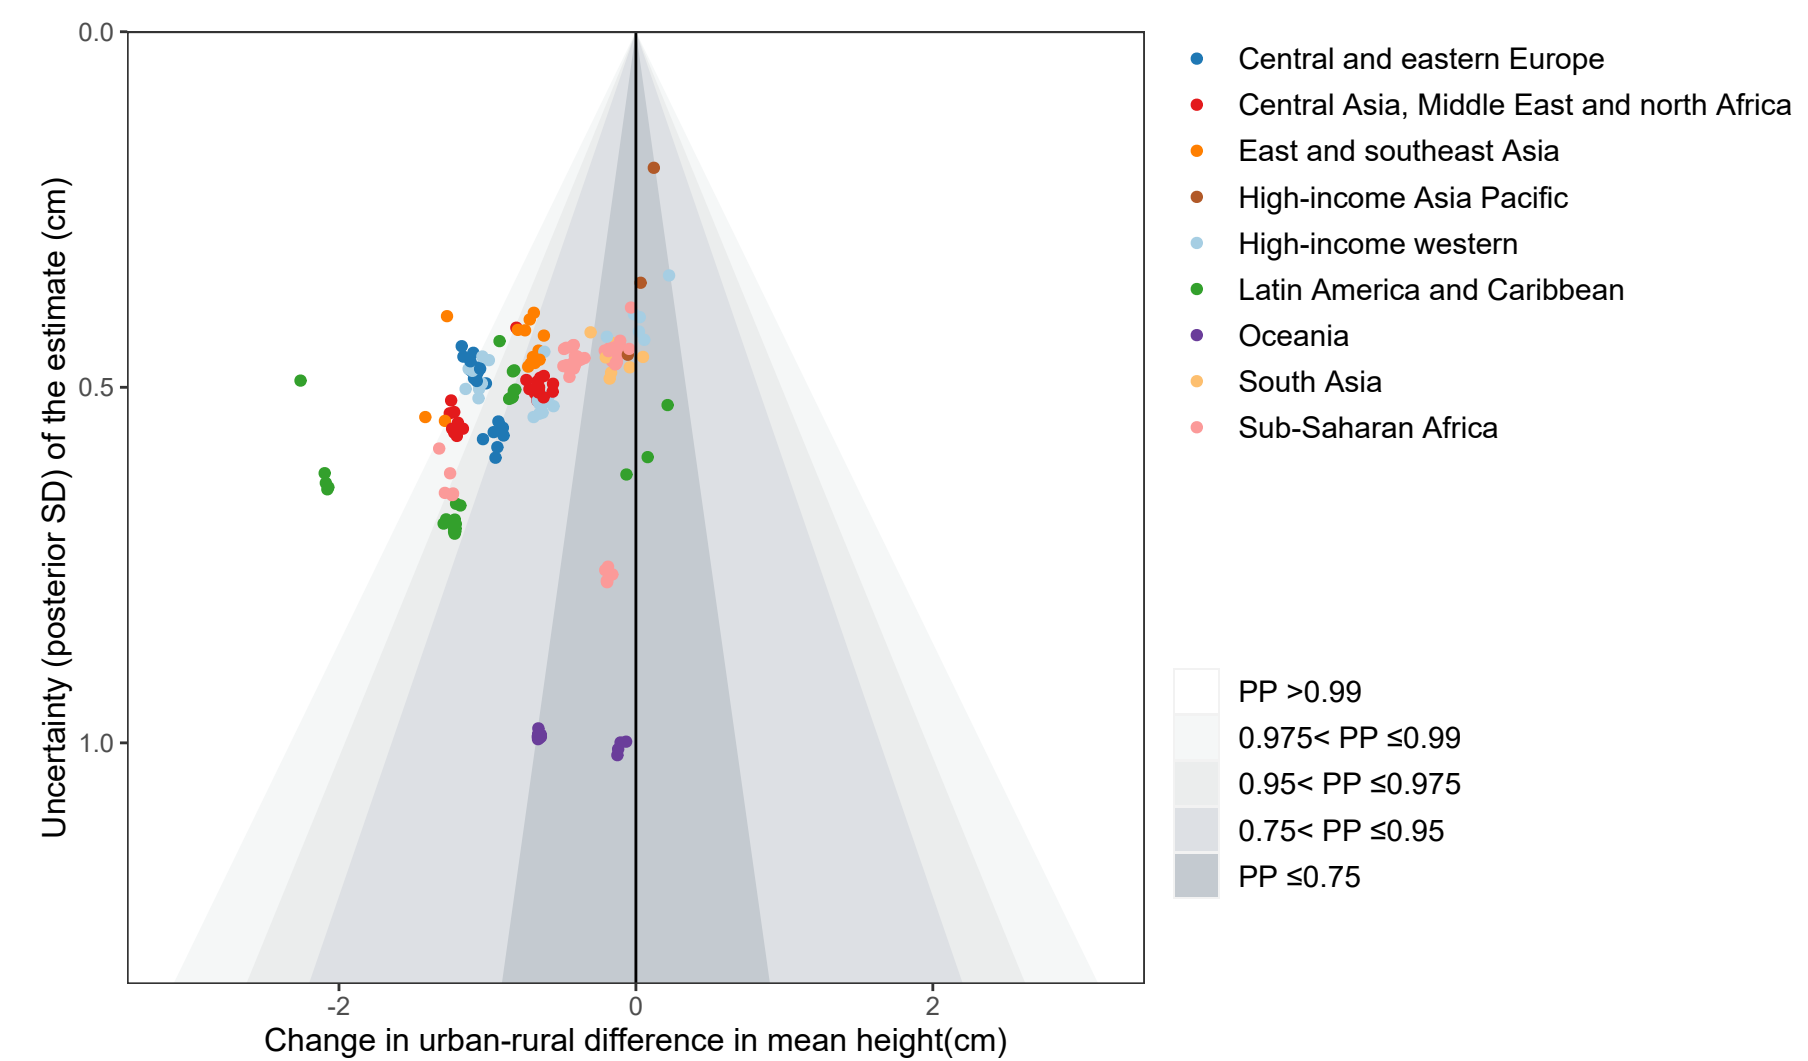



### Urban-rural difference in 2020 (boys, age 19)

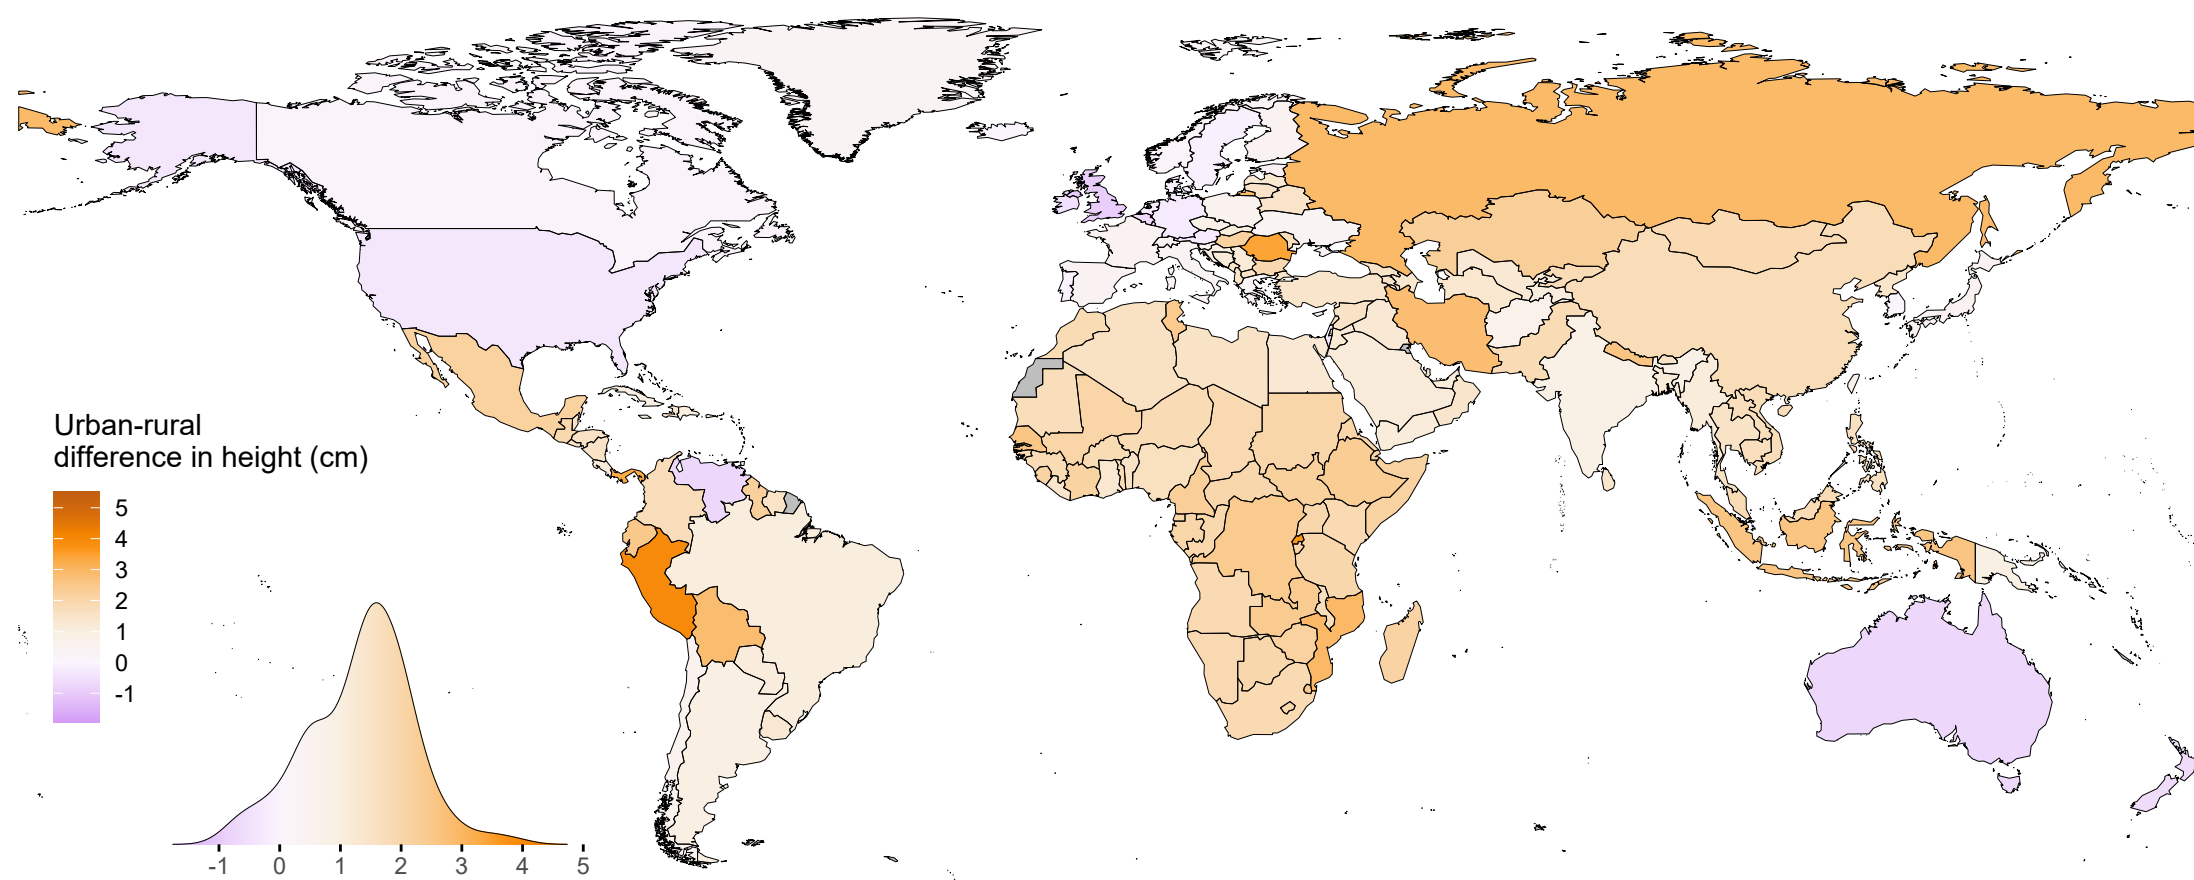

Urban-rural difference in height (cm)

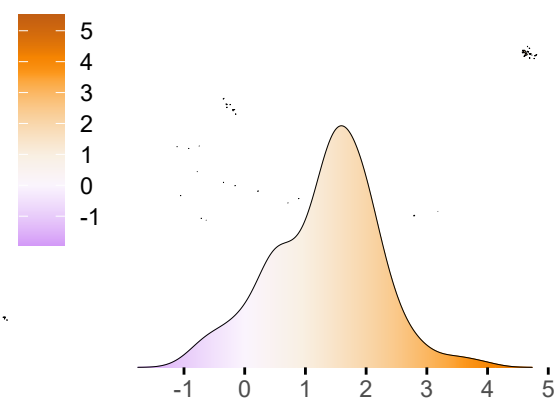

- |                                            |                                                          |                                                |                                          |
|--------------------------------------------|----------------------------------------------------------|------------------------------------------------|------------------------------------------|
| <input type="checkbox"/> American Samoa    | <input type="checkbox"/> Fiji                            | <input type="checkbox"/> Montenegro            | <input type="checkbox"/> Seychelles      |
| <input type="checkbox"/> Bahrain           | <input type="checkbox"/> French Polynesia                | <input type="checkbox"/> Nauru                 | <input type="checkbox"/> Solomon Islands |
| <input type="checkbox"/> Bermuda           | <input type="checkbox"/> Kiribati                        | <input type="checkbox"/> Niue                  | <input type="checkbox"/> Tokelau         |
| <input type="checkbox"/> Brunei Darussalam | <input type="checkbox"/> Maldives                        | <input type="checkbox"/> Palau                 | <input type="checkbox"/> Tonga           |
| <input type="checkbox"/> Cape Verde        | <input type="checkbox"/> Marshall Islands                | <input type="checkbox"/> Samoa                 | <input type="checkbox"/> Tuvalu          |
| <input type="checkbox"/> Comoros           | <input type="checkbox"/> Mauritius                       | <input type="checkbox"/> Sao Tome and Principe | <input type="checkbox"/> Vanuatu         |
| <input type="checkbox"/> Cook Islands      | <input type="checkbox"/> Mirconesia, Federated States of |                                                |                                          |

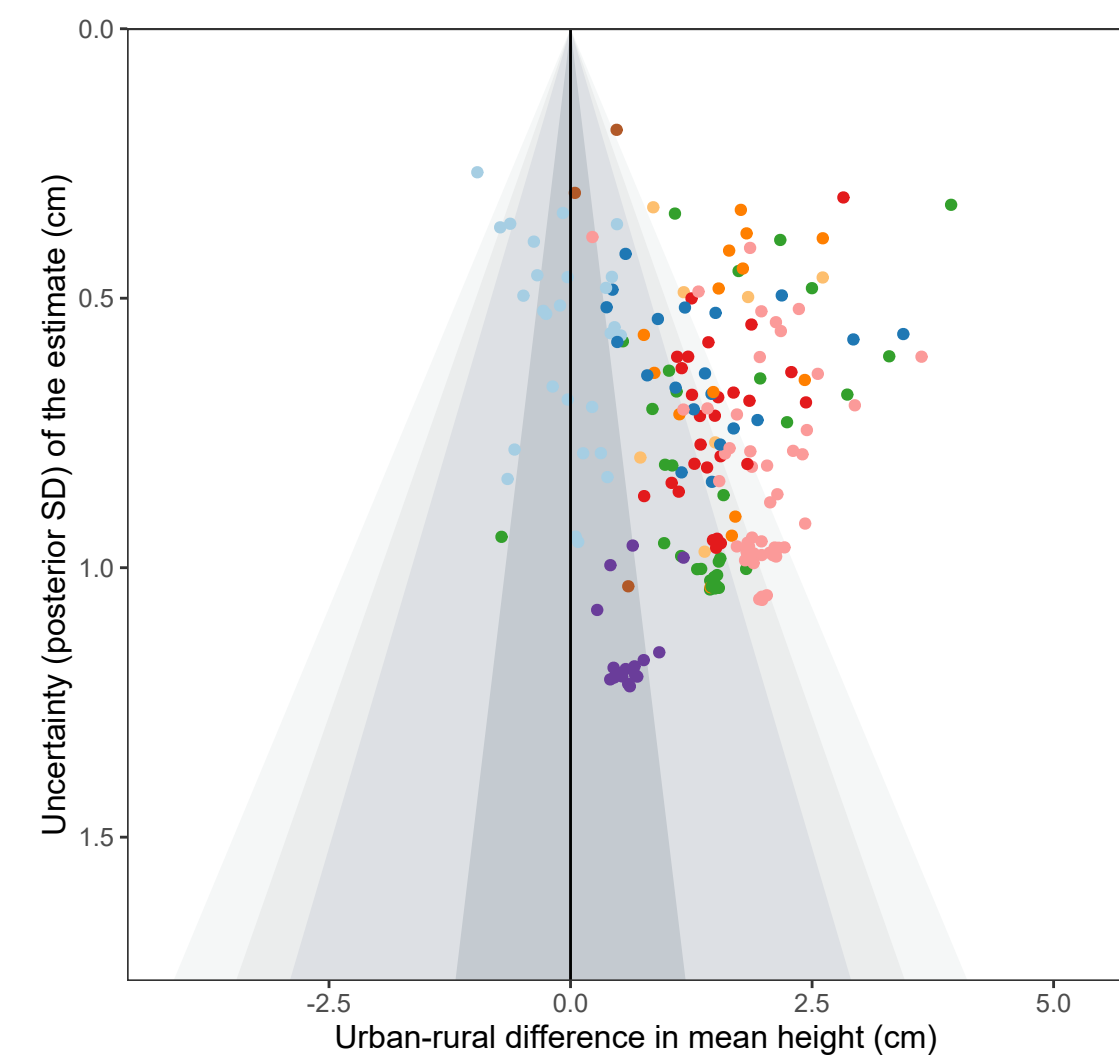

- Central and eastern Europe
- Central Asia, Middle East and north Africa
- East and southeast Asia
- High-income Asia Pacific
- High-income western
- Latin America and Caribbean
- Oceania
- South Asia
- Sub-Saharan Africa

- PP > 0.99
- 0.975 < PP ≤ 0.99
- 0.95 < PP ≤ 0.975
- 0.75 < PP ≤ 0.95
- PP ≤ 0.75

### Change 1990-2020 (boys, age 19)

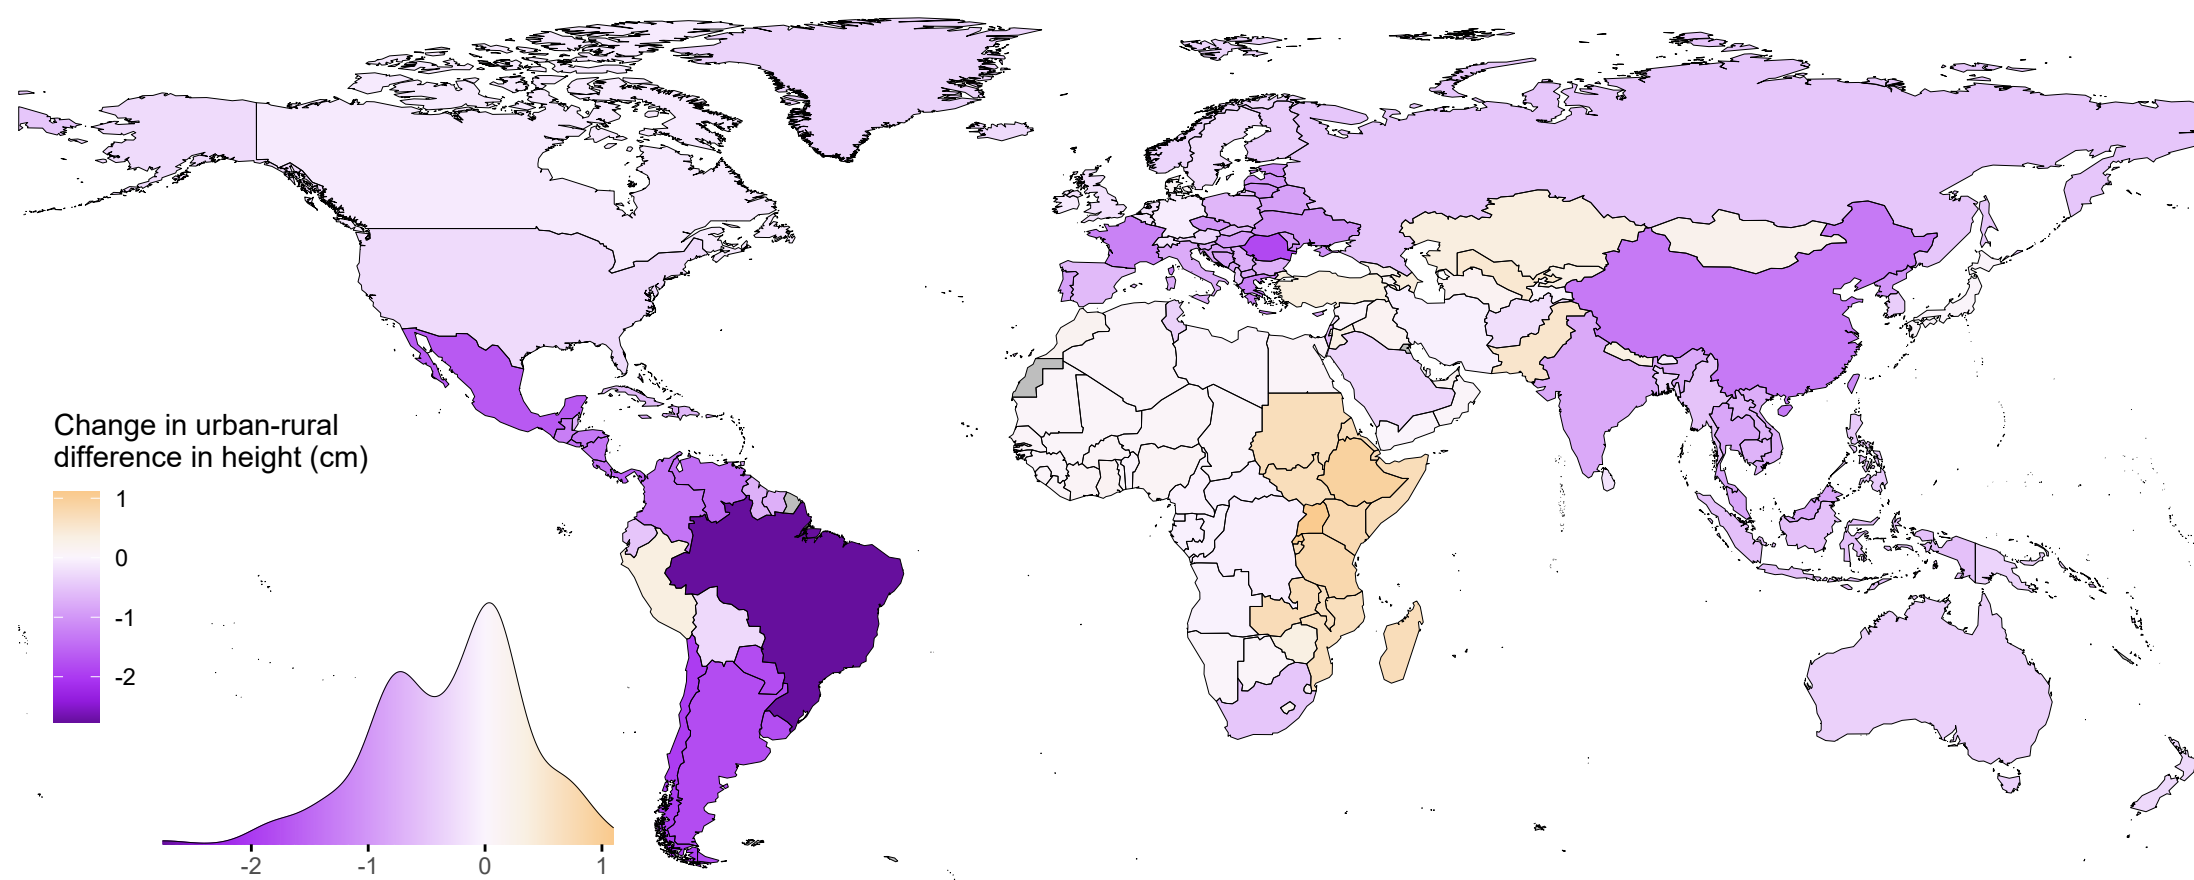

Change in urban-rural difference in height (cm)

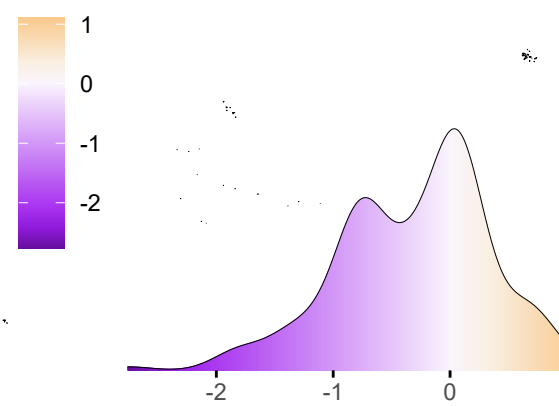

- |                                            |                                                          |                                                |                                          |
|--------------------------------------------|----------------------------------------------------------|------------------------------------------------|------------------------------------------|
| <input type="checkbox"/> American Samoa    | <input type="checkbox"/> Fiji                            | <input type="checkbox"/> Montenegro            | <input type="checkbox"/> Seychelles      |
| <input type="checkbox"/> Bahrain           | <input type="checkbox"/> French Polynesia                | <input type="checkbox"/> Nauru                 | <input type="checkbox"/> Solomon Islands |
| <input type="checkbox"/> Bermuda           | <input type="checkbox"/> Kiribati                        | <input type="checkbox"/> Niue                  | <input type="checkbox"/> Tokelau         |
| <input type="checkbox"/> Brunei Darussalam | <input type="checkbox"/> Maldives                        | <input type="checkbox"/> Palau                 | <input type="checkbox"/> Tonga           |
| <input type="checkbox"/> Cape Verde        | <input type="checkbox"/> Marshall Islands                | <input type="checkbox"/> Samoa                 | <input type="checkbox"/> Tuvalu          |
| <input type="checkbox"/> Comoros           | <input type="checkbox"/> Mauritius                       | <input type="checkbox"/> Sao Tome and Principe | <input type="checkbox"/> Vanuatu         |
| <input type="checkbox"/> Cook Islands      | <input type="checkbox"/> Mirconesia, Federated States of |                                                |                                          |

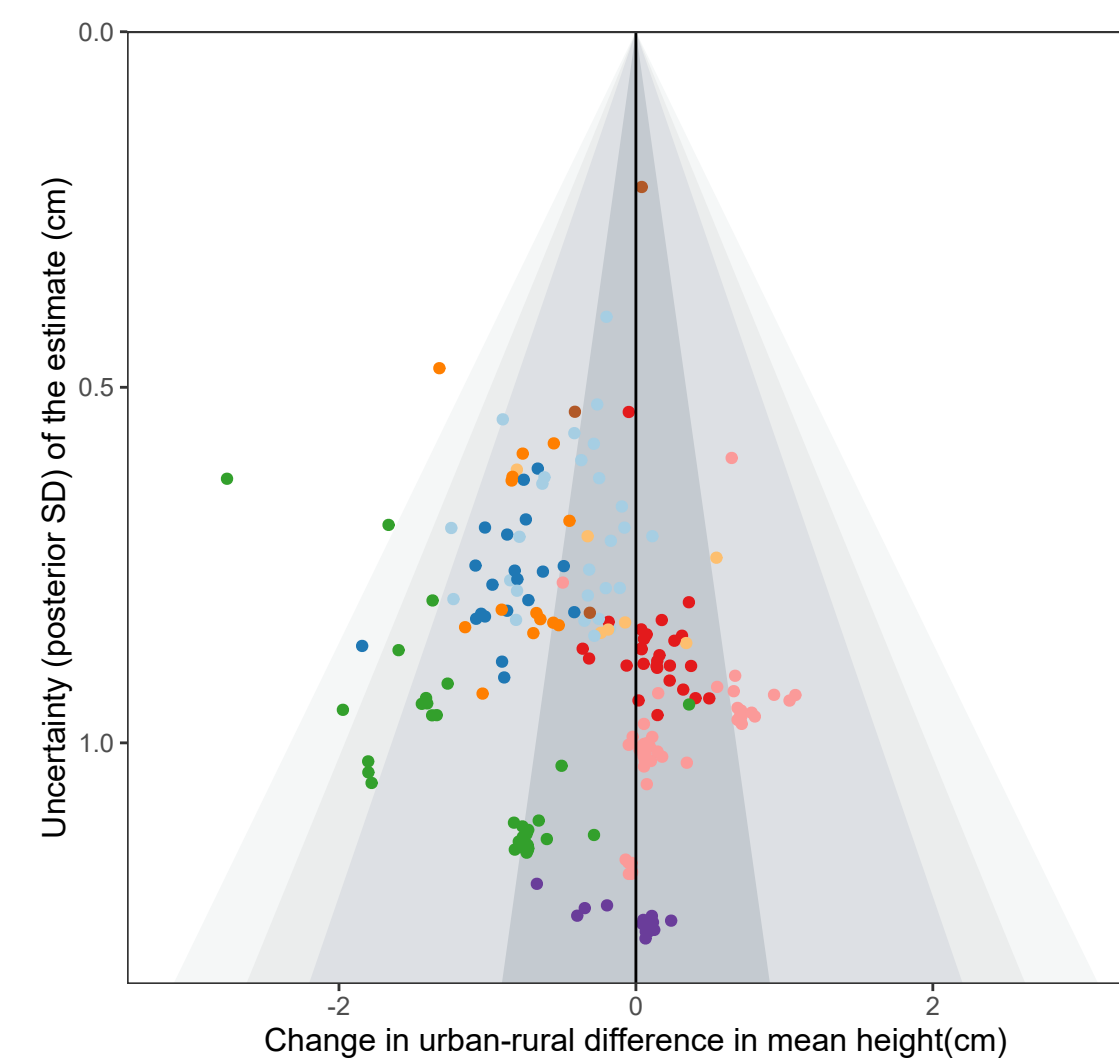

- Central and eastern Europe
- Central Asia, Middle East and north Africa
- East and southeast Asia
- High-income Asia Pacific
- High-income western
- Latin America and Caribbean
- Oceania
- South Asia
- Sub-Saharan Africa

- PP > 0.99
- 0.975 < PP ≤ 0.99
- 0.95 < PP ≤ 0.975
- 0.75 < PP ≤ 0.95
- PP ≤ 0.75



**Supplementary Figure 8.** Urban-rural body-mass index (BMI) difference in 2020 and change from 1990 to 2020, by age.

The maps show the urban-rural difference in mean BMI in 2020, and its change from 1990 to 2020 for girls and boys results at ages 5, 10, 15 and 19 years. A positive number shows higher urban mean BMI and a negative number show higher rural mean BMI. See Supplementary Figure 7 caption for descriptions of other sections of the figure.

We did not estimate the difference between rural and urban BMI for areas classified as entirely urban (Bermuda, Kuwait, Nauru and Singapore) or entirely rural (Tokelau), as indicated by grey colour.

### Urban-rural difference in 2020 (girls, age 5)

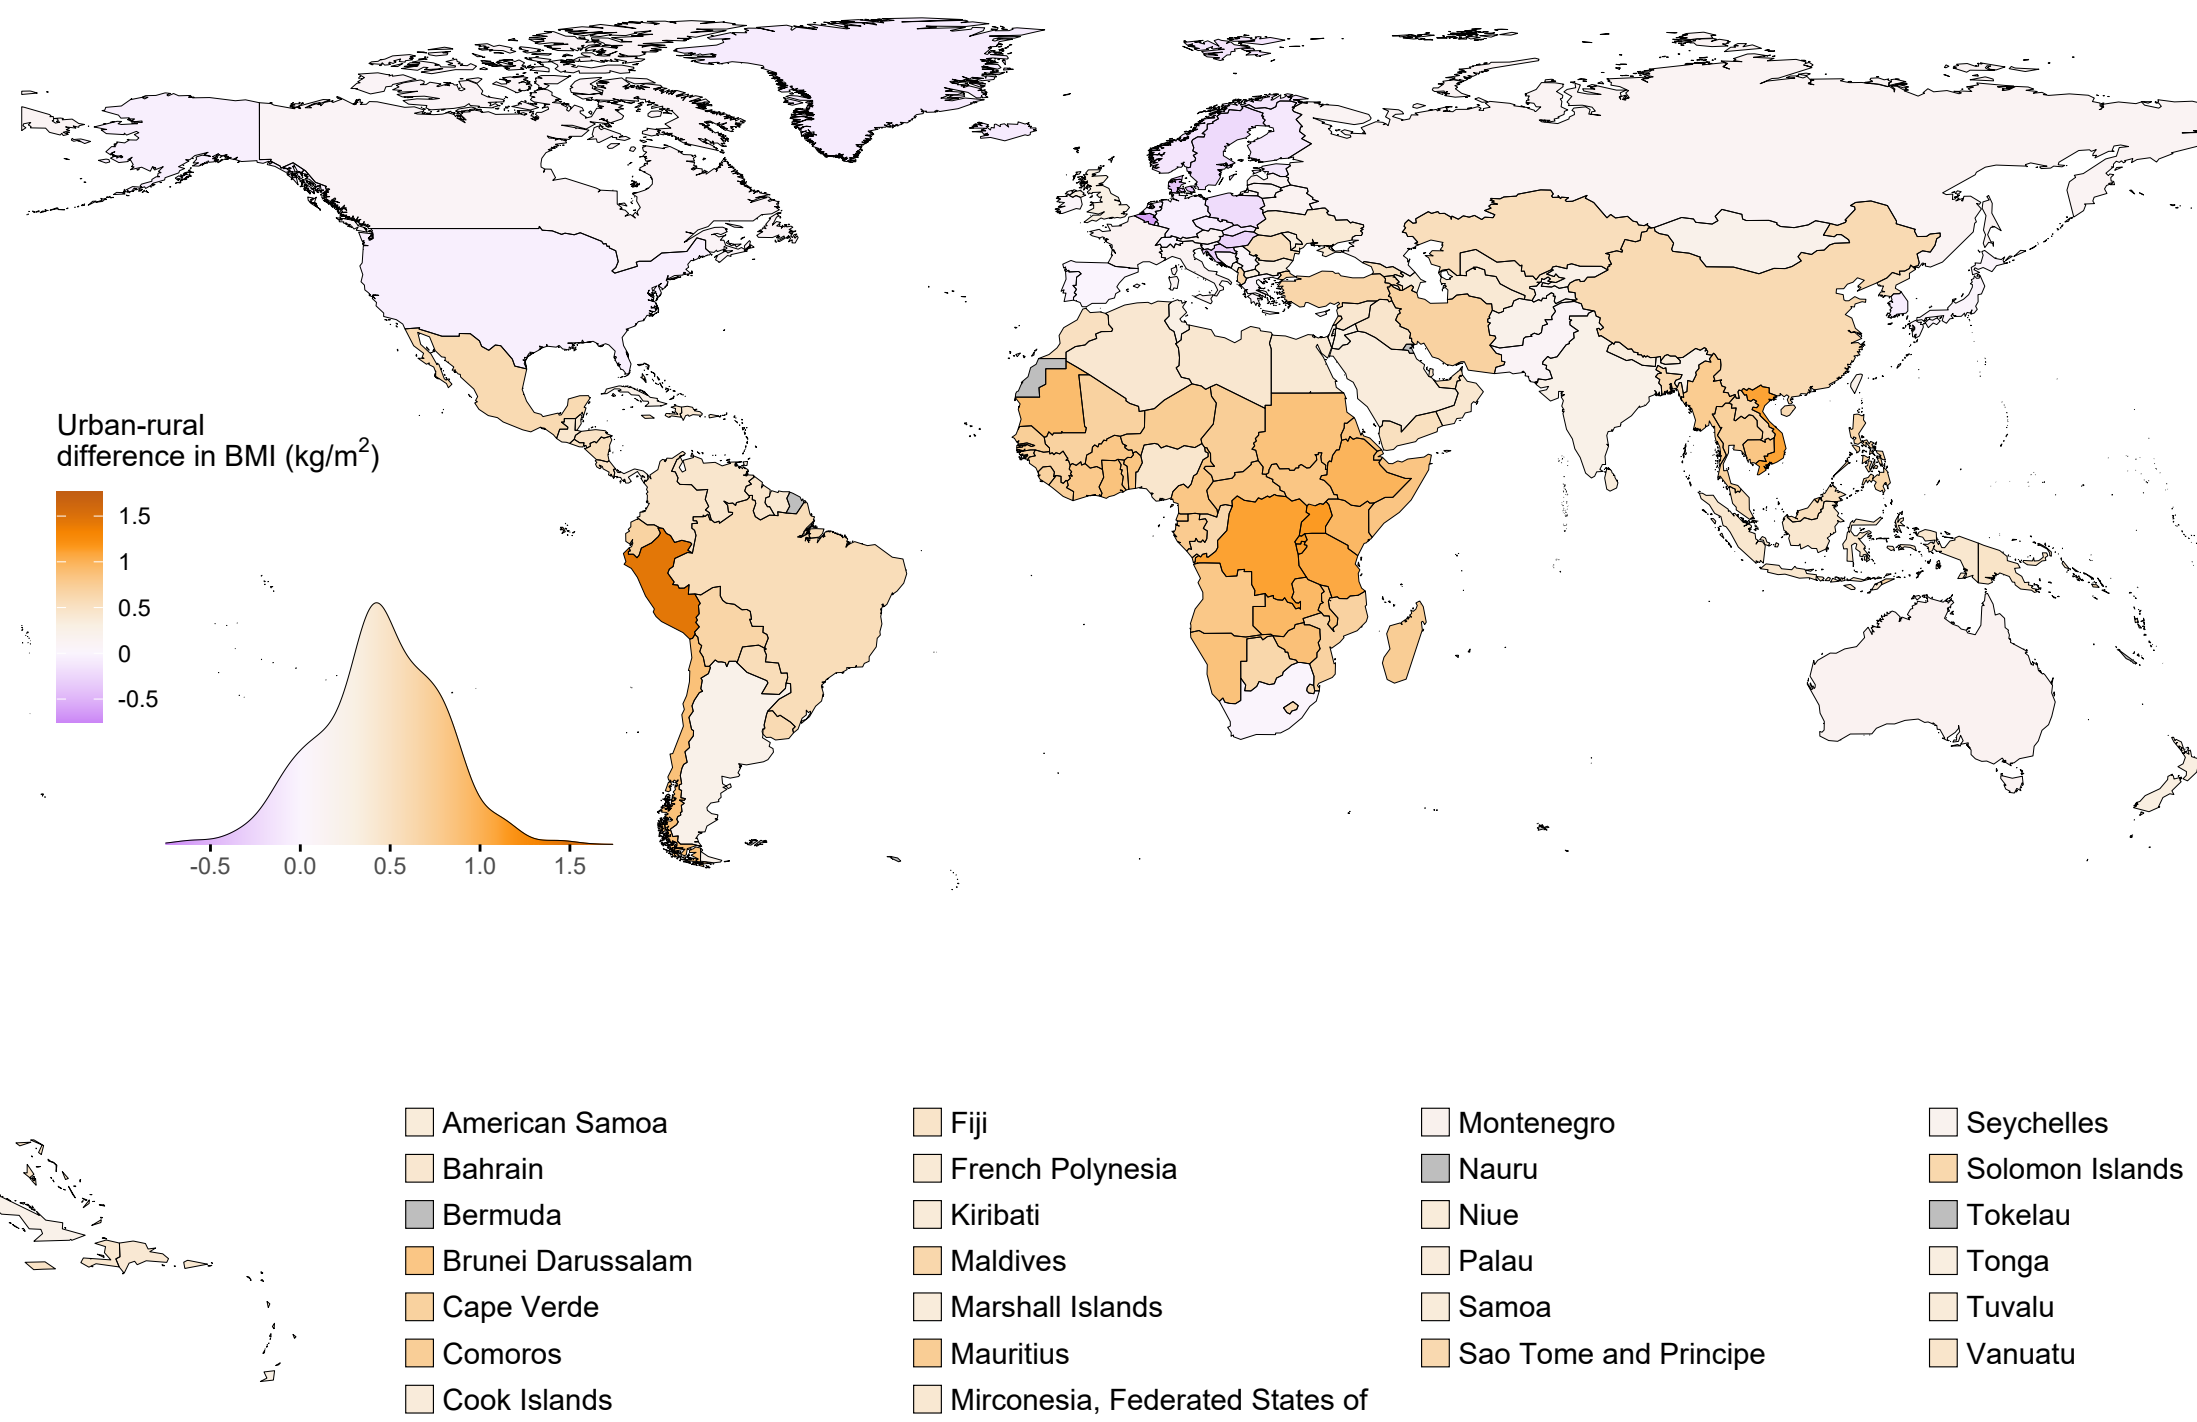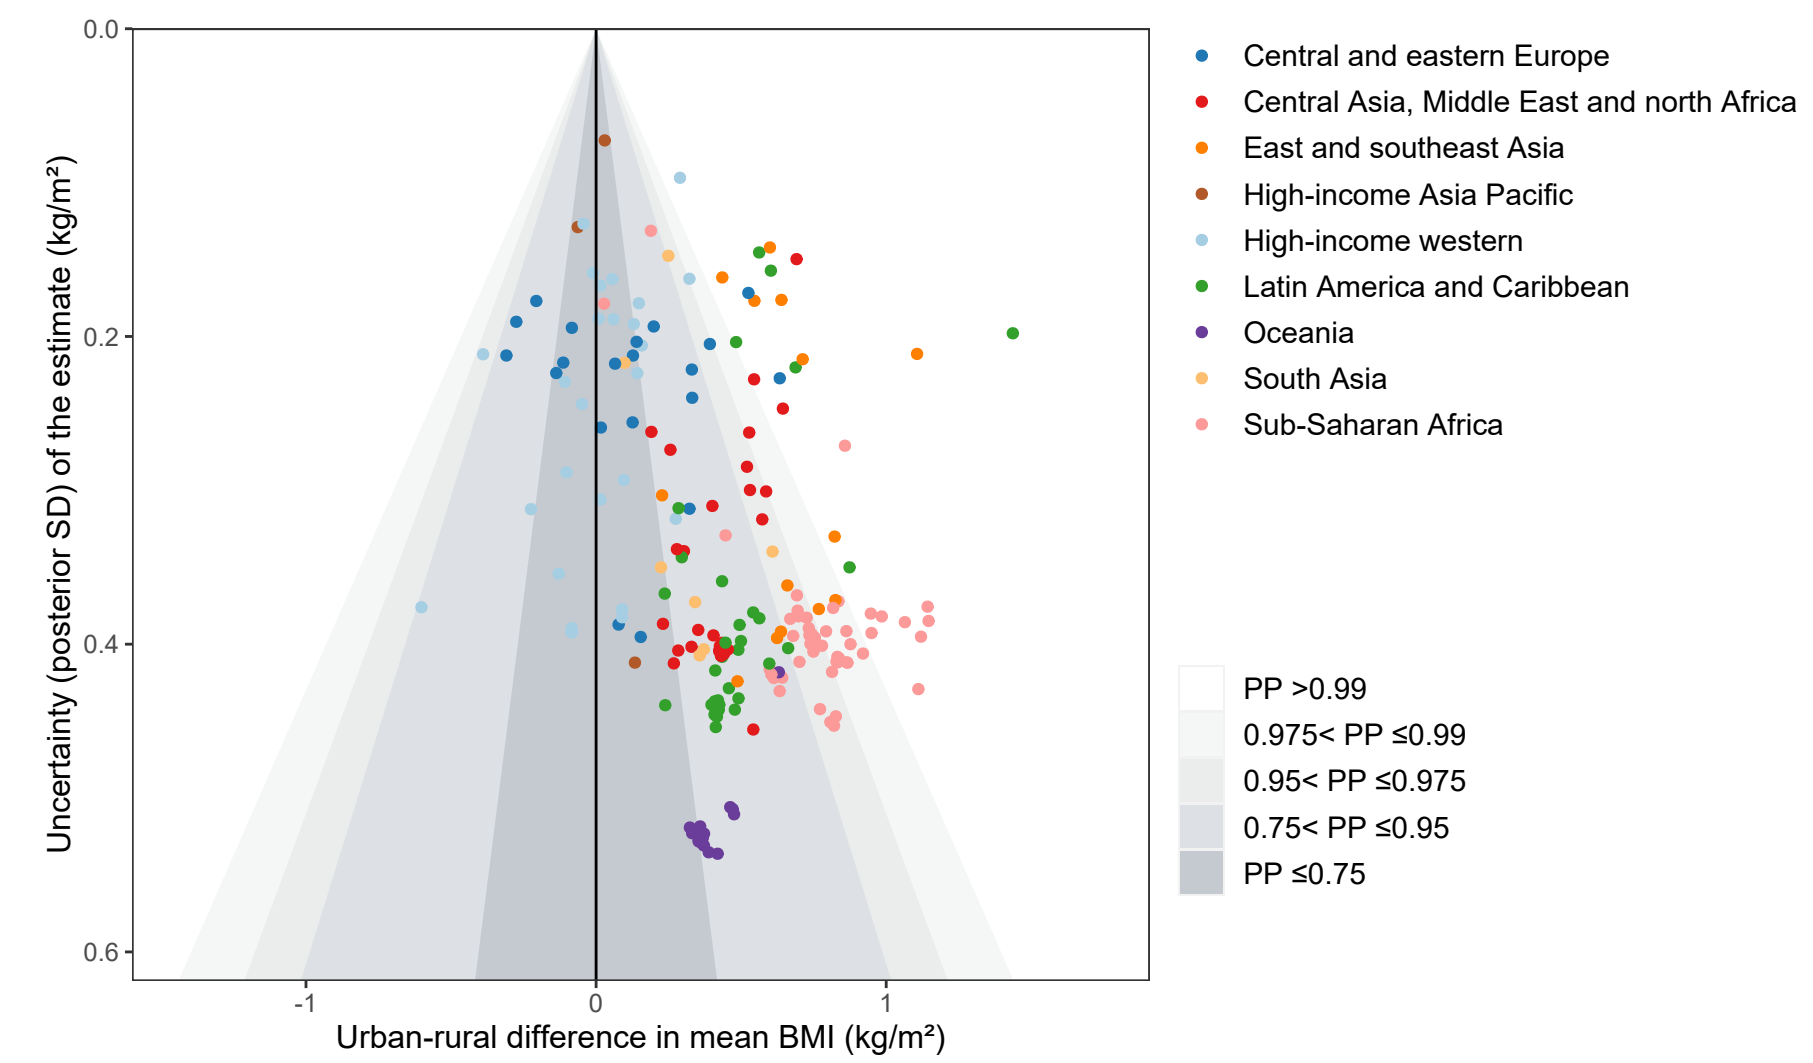

### Change 1990-2020 (girls, age 5)

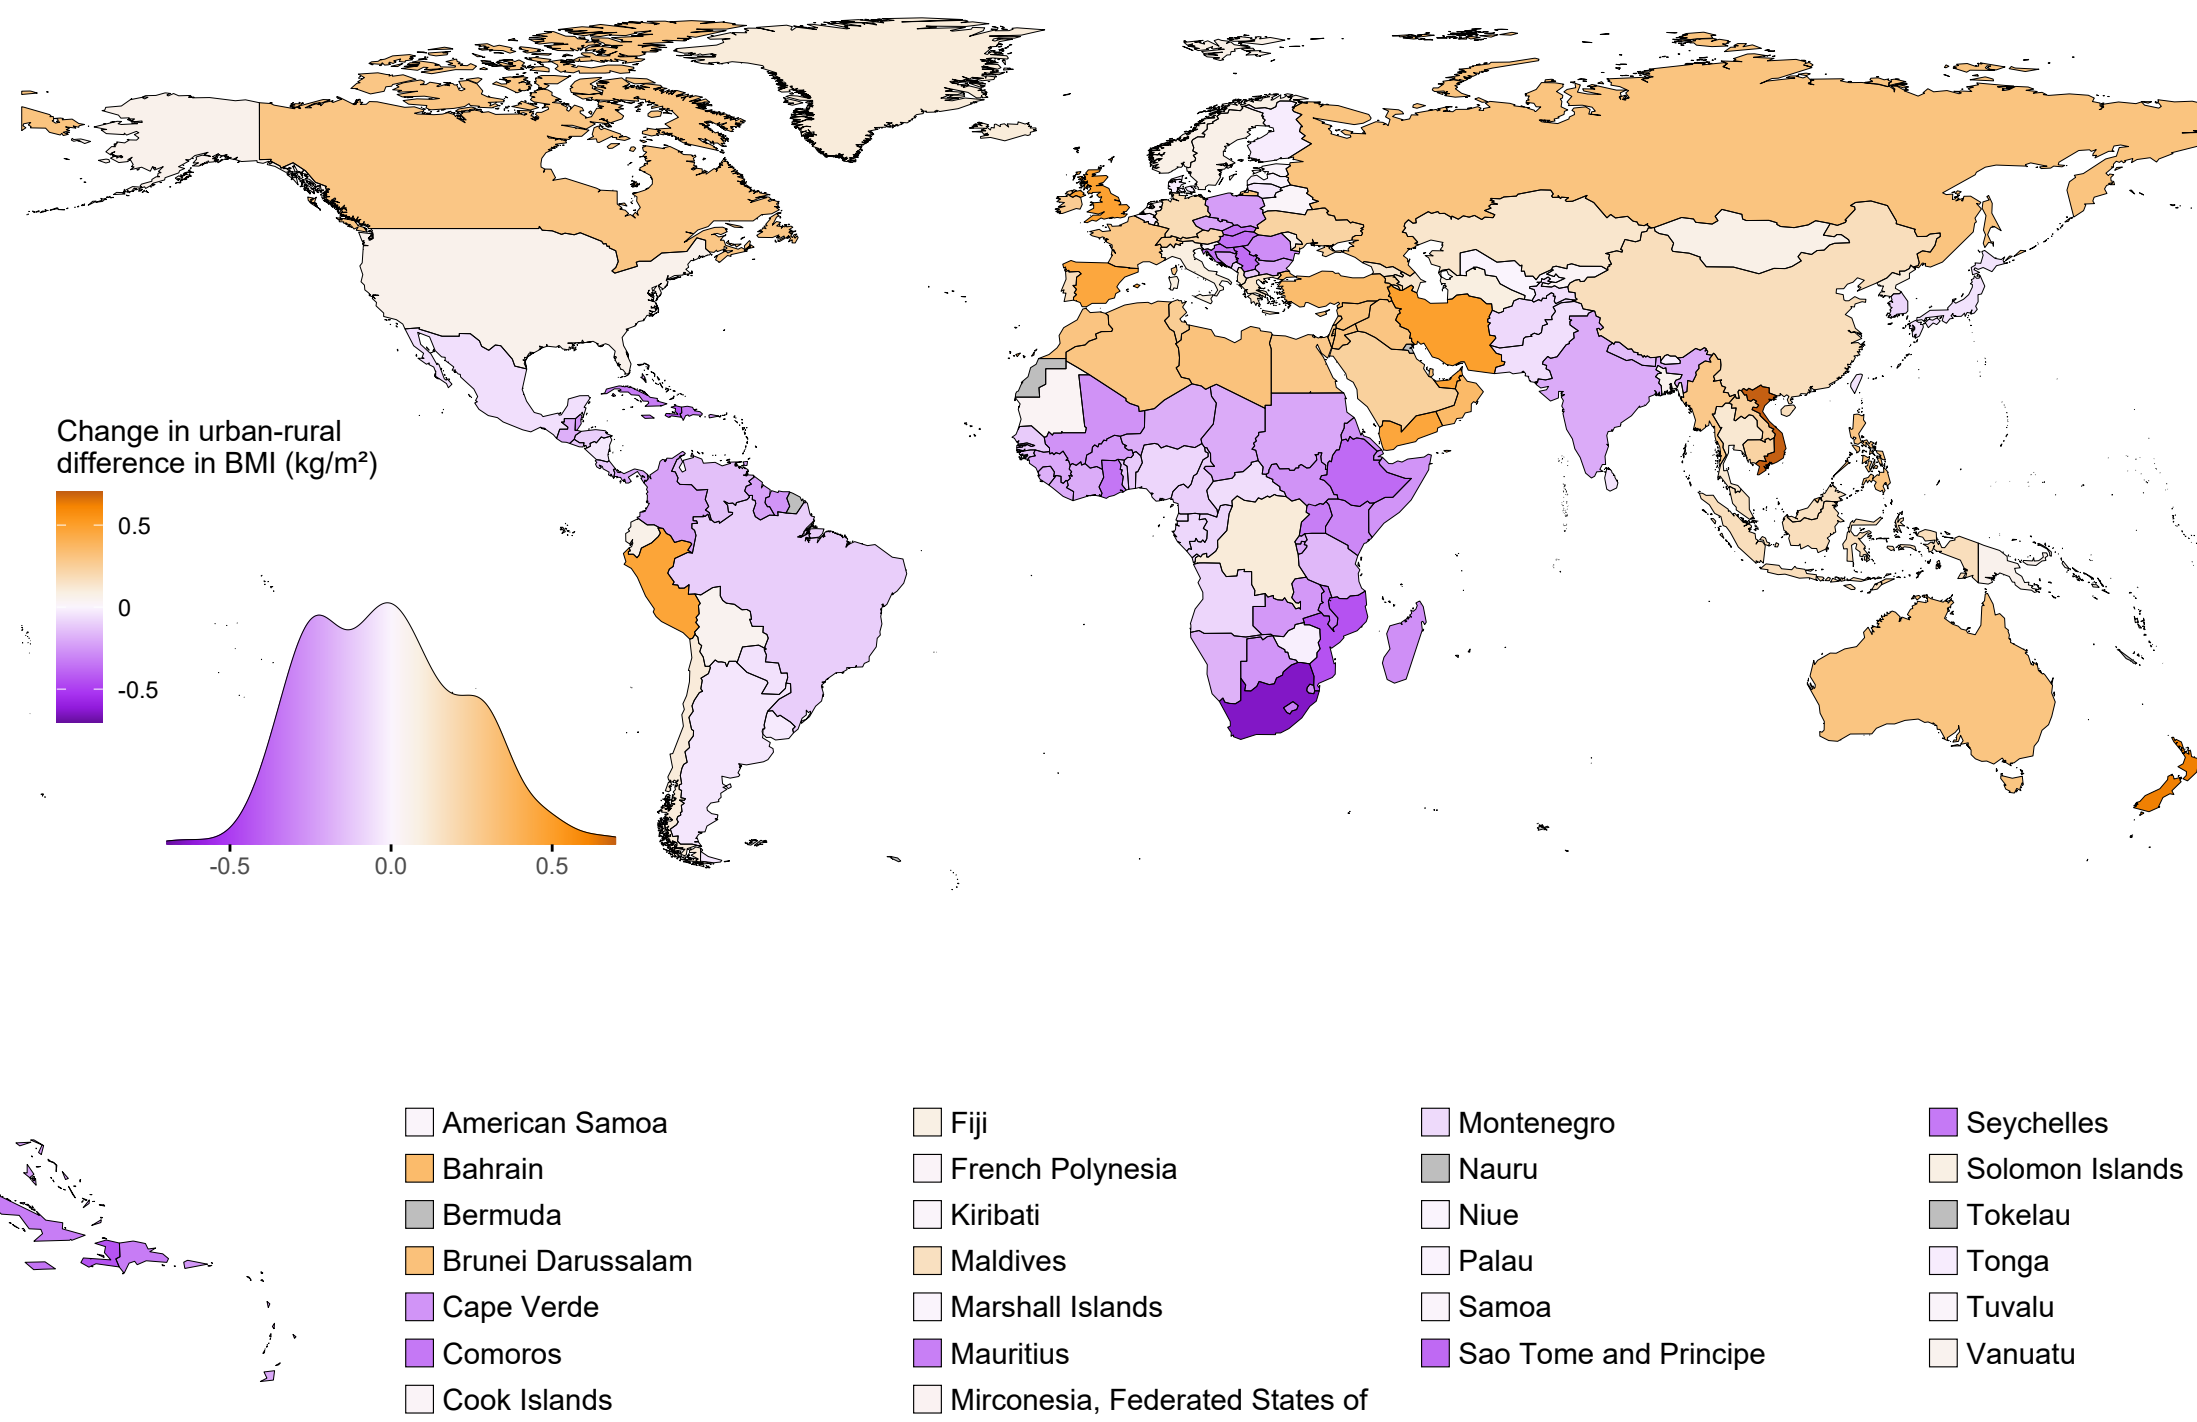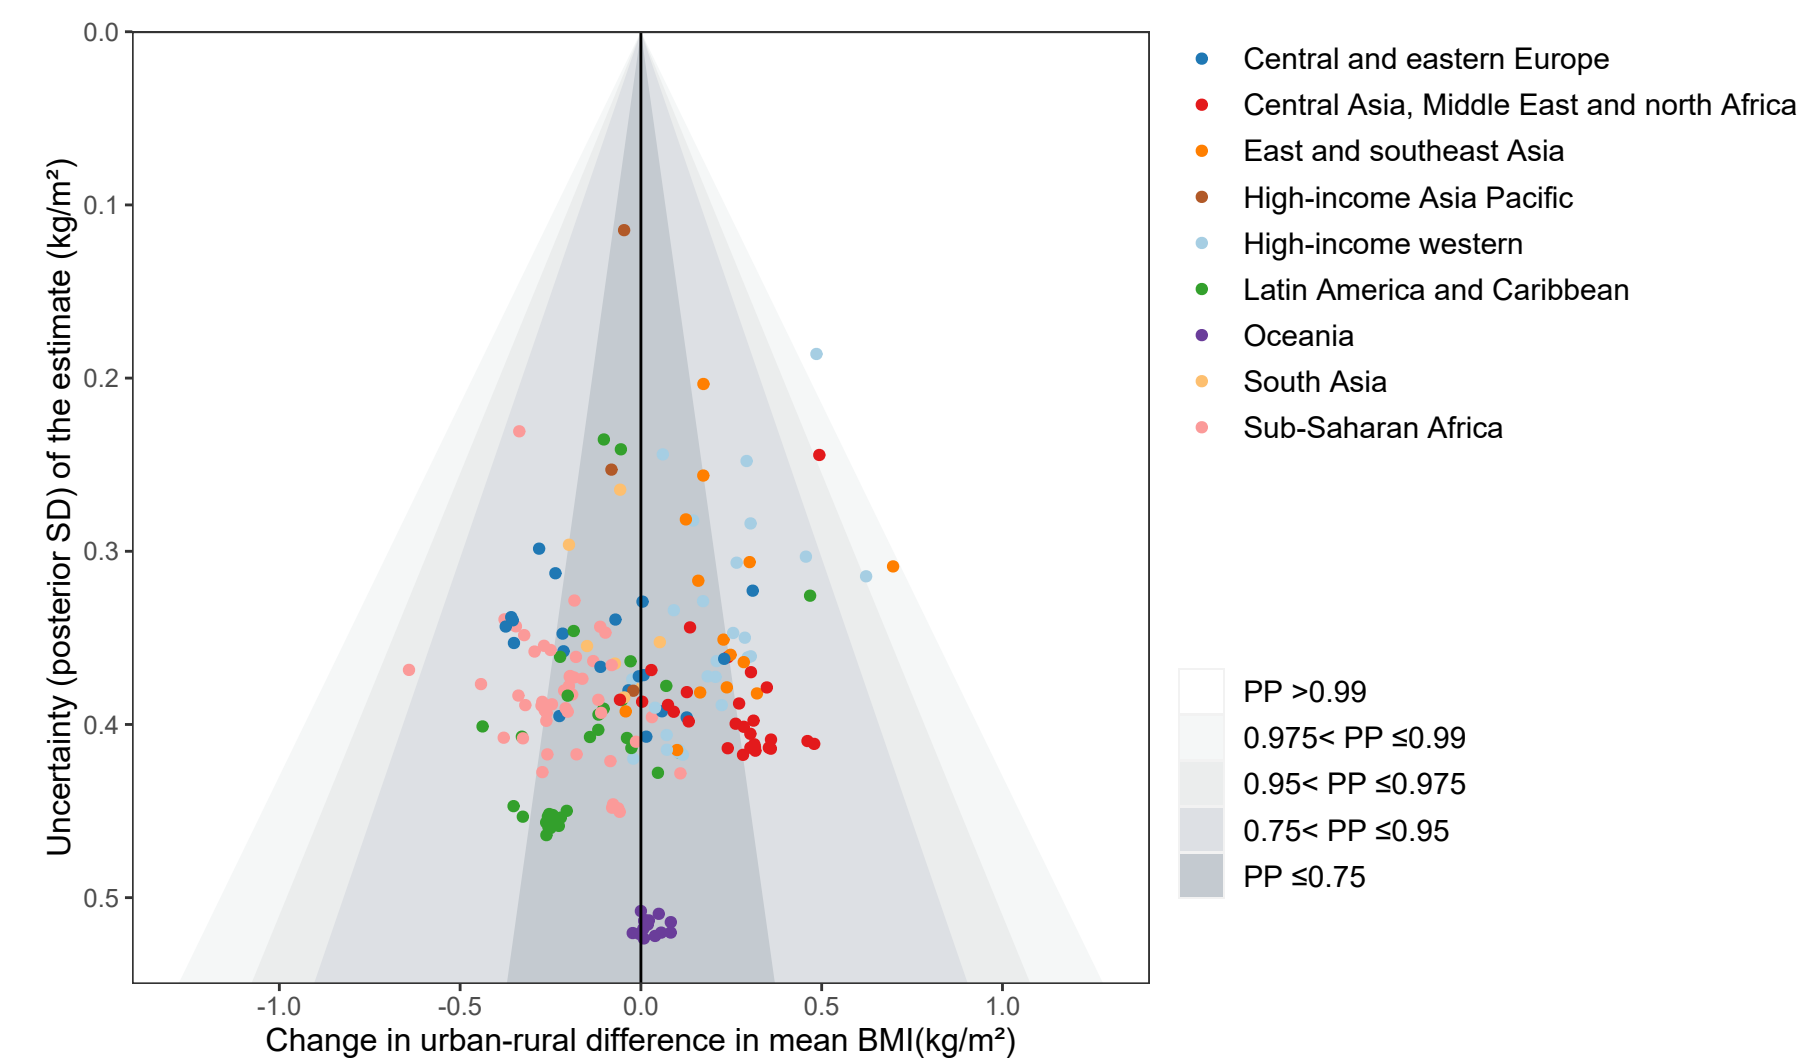

### Urban-rural difference in 2020 (boys, age 5)

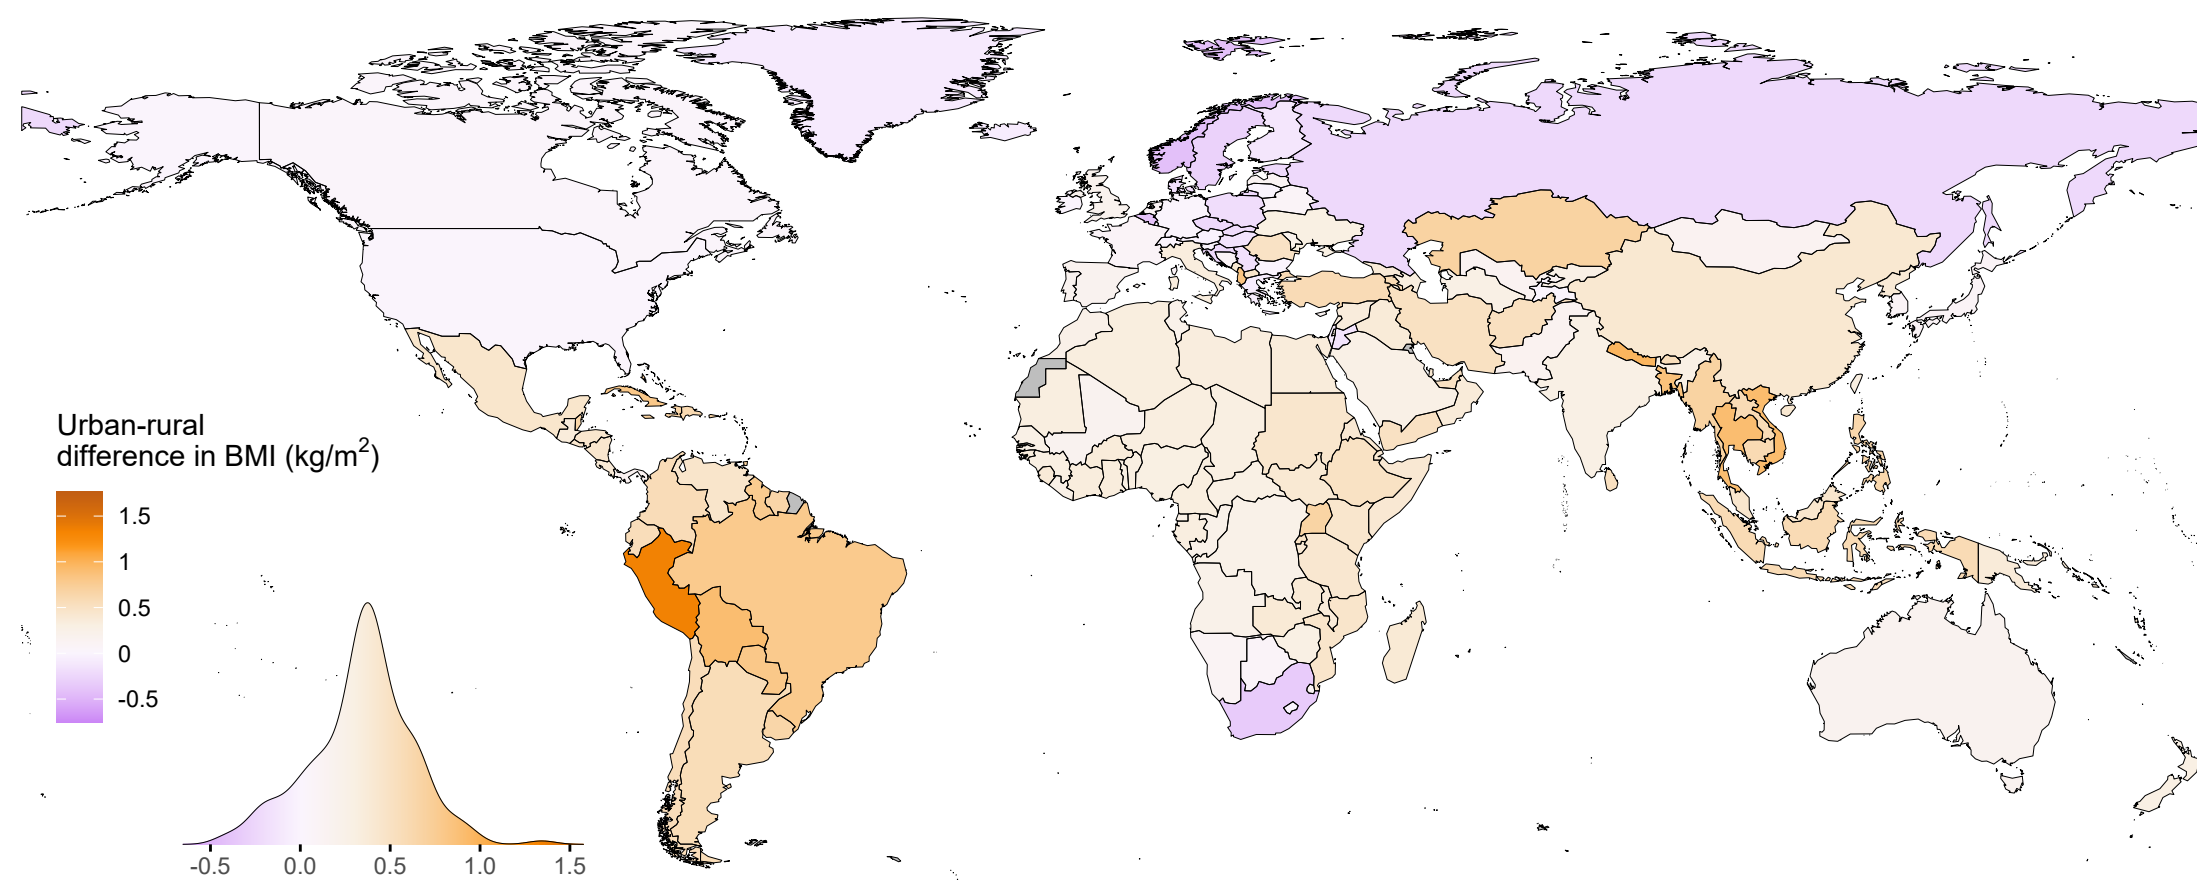

Urban-rural difference in BMI (kg/m<sup>2</sup>)

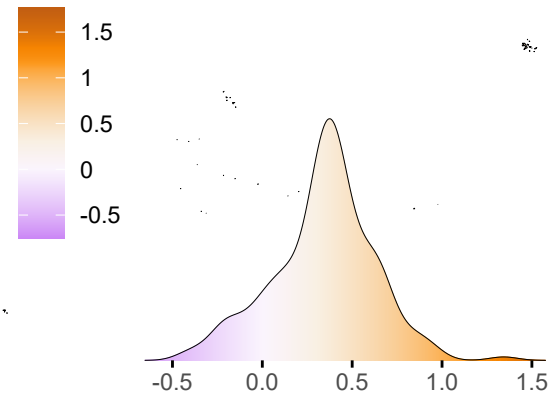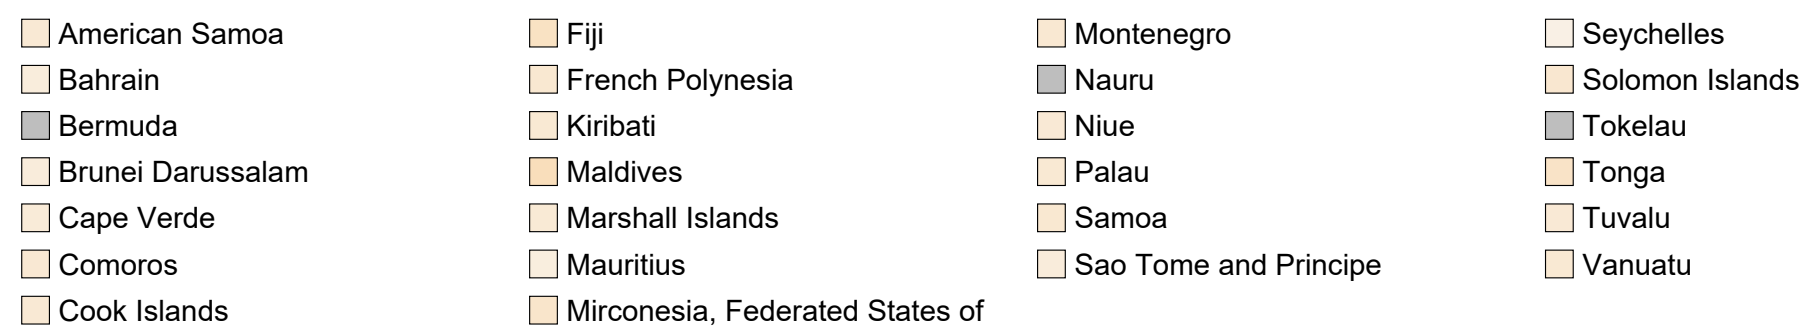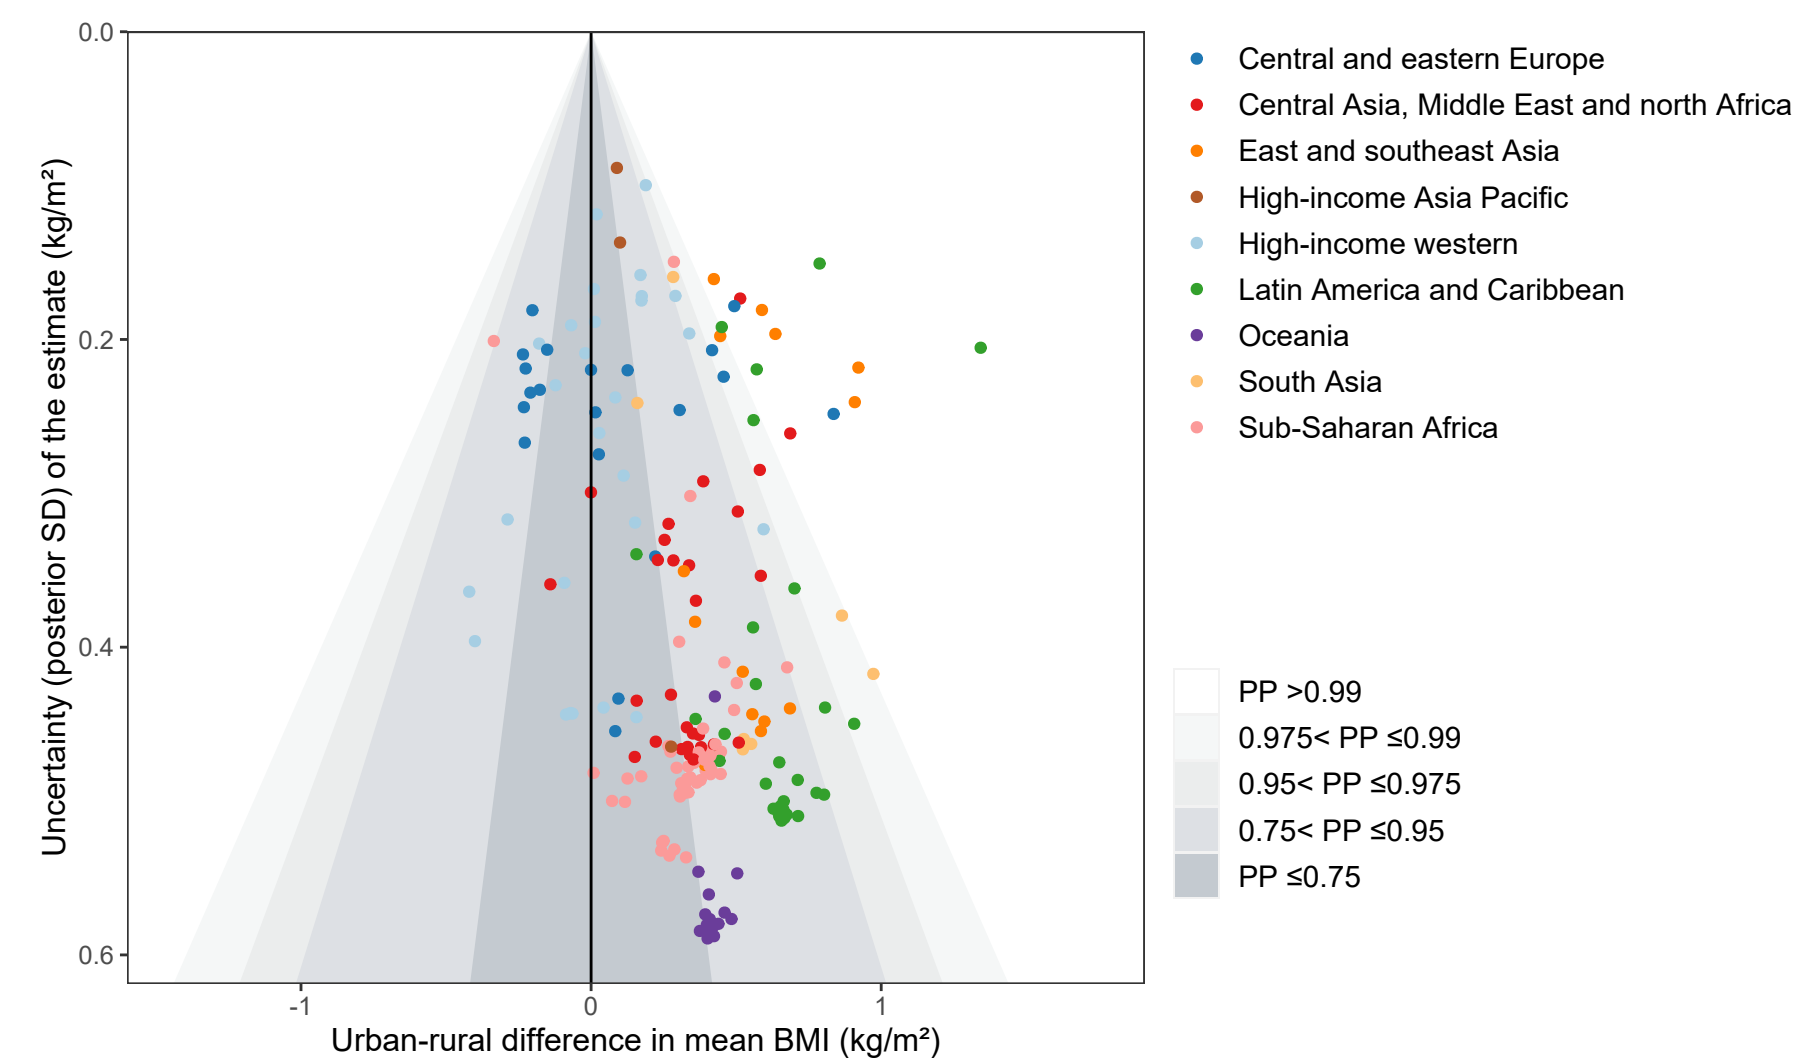

### Change 1990-2020 (boys, age 5)

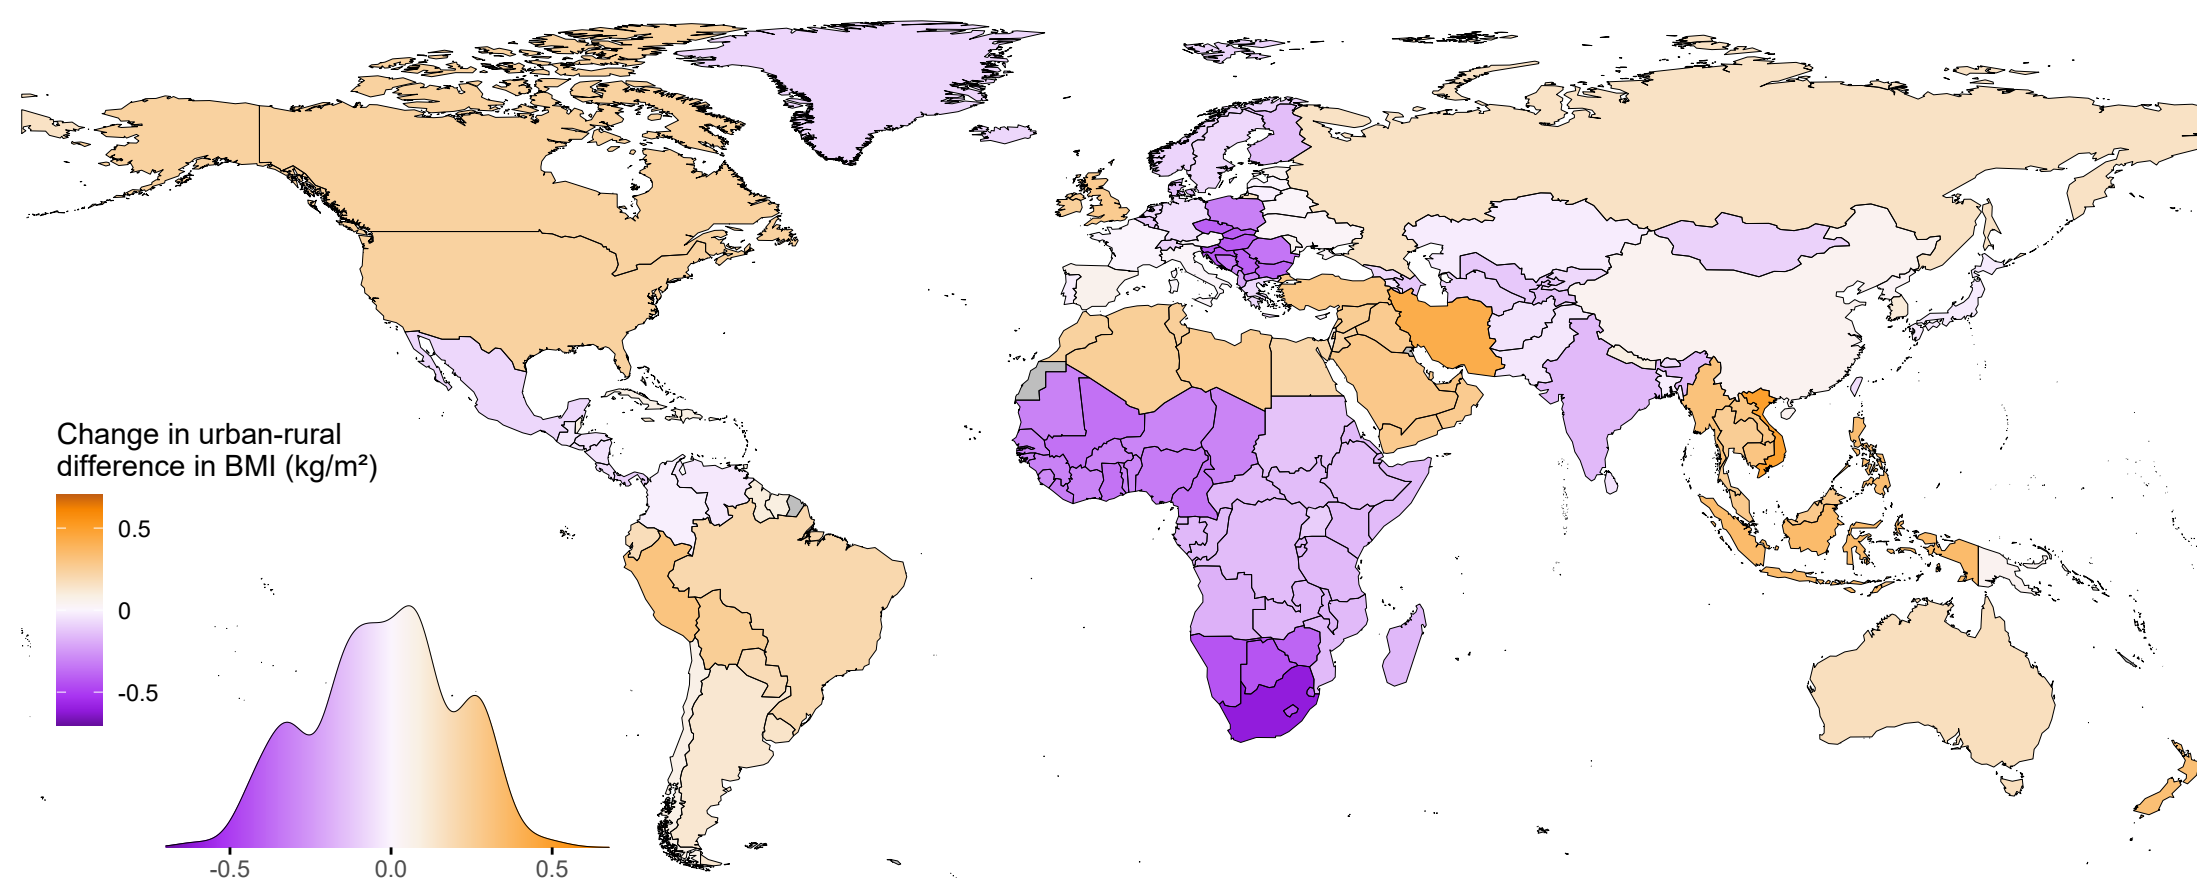

Change in urban-rural difference in BMI (kg/m<sup>2</sup>)

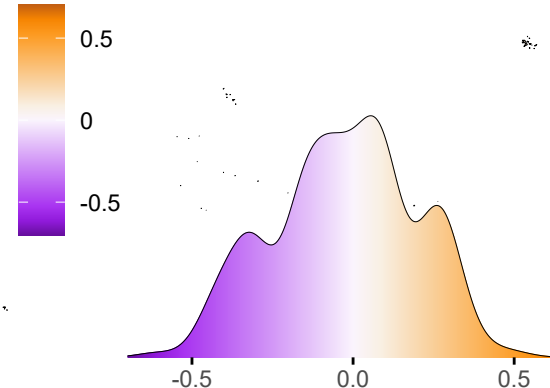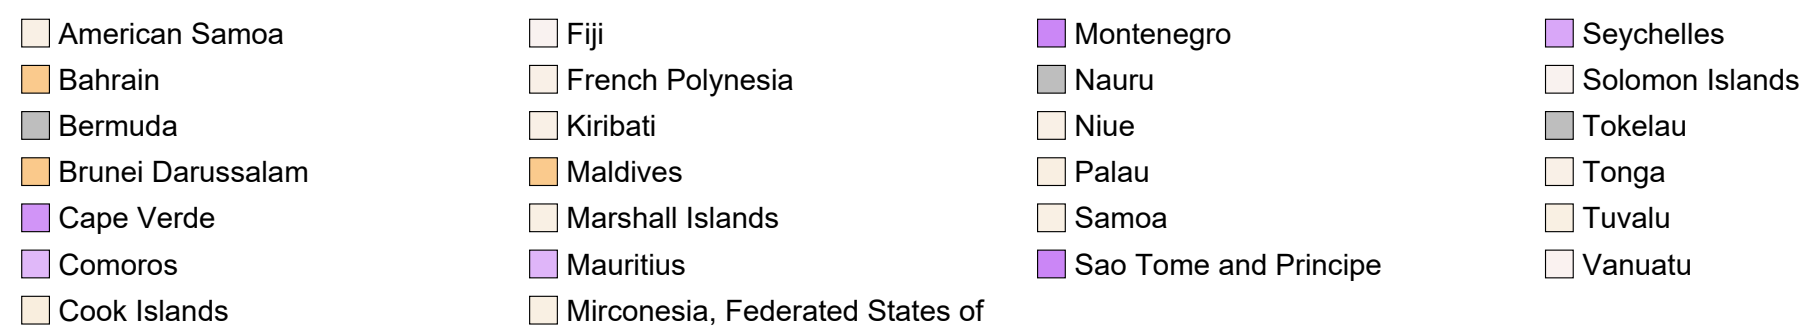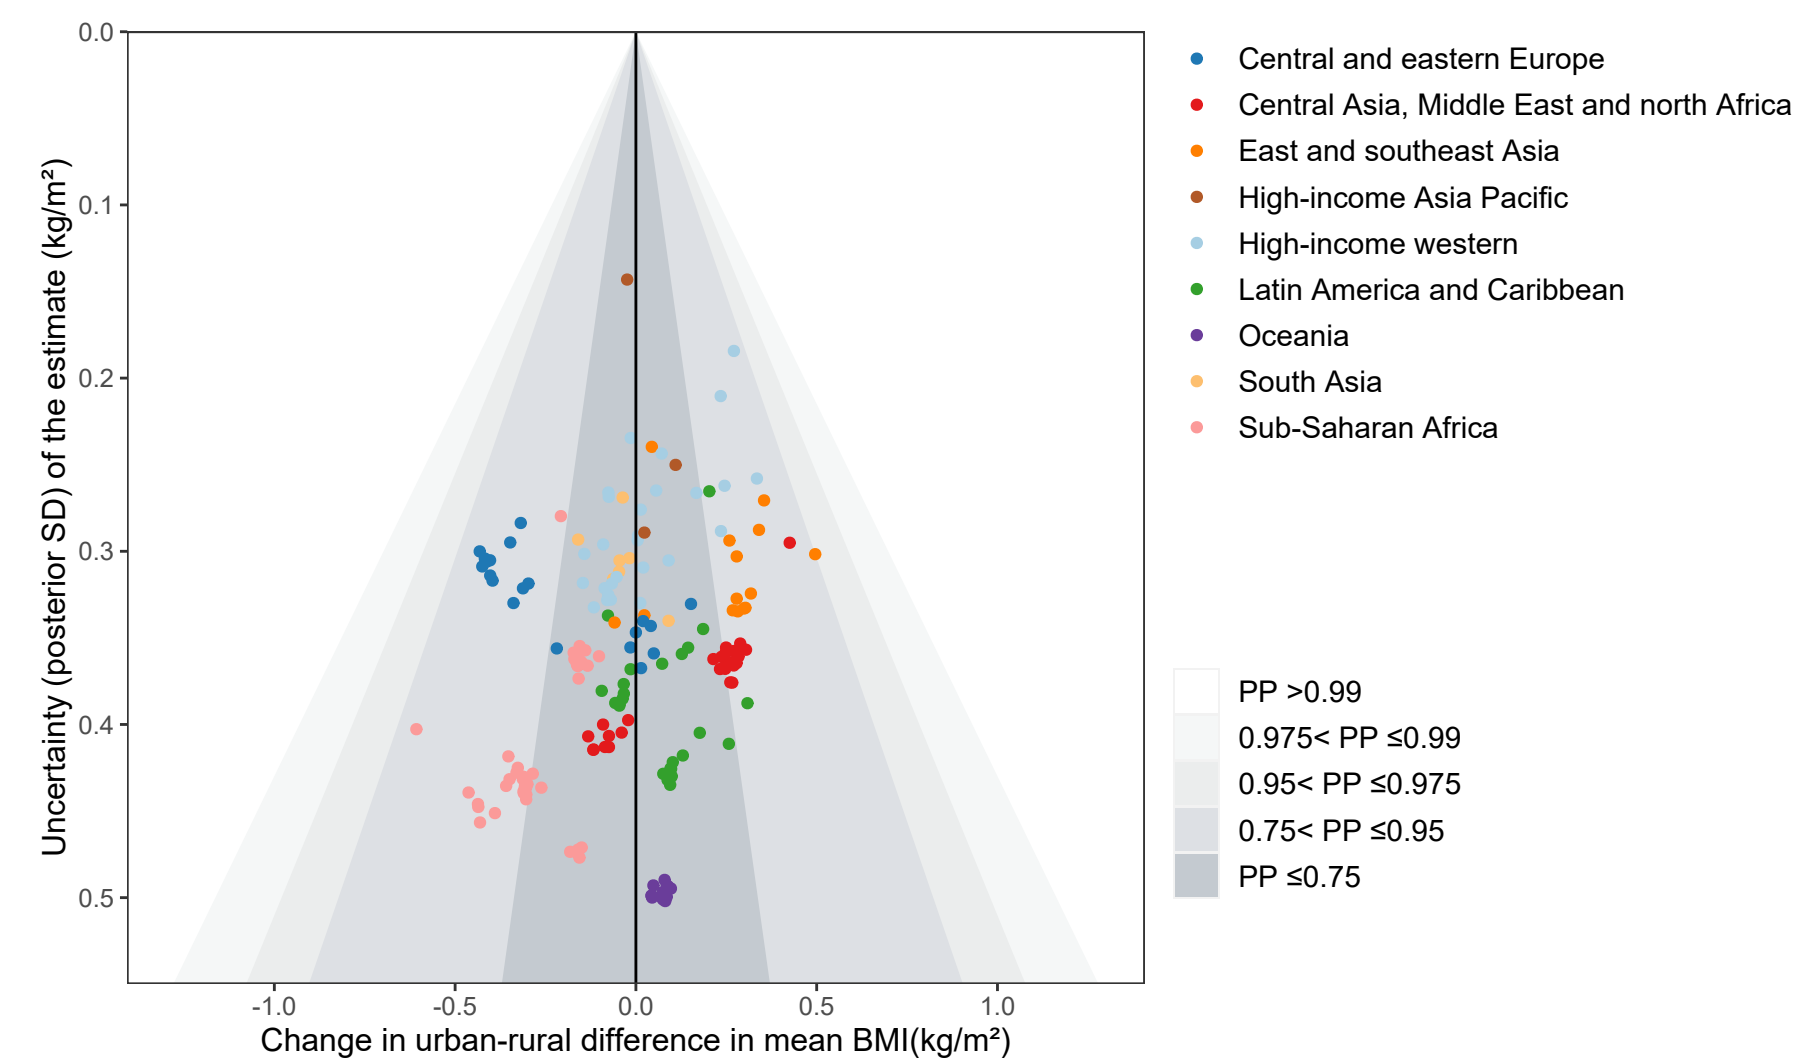



### Urban-rural difference in 2020 (girls, age 10)

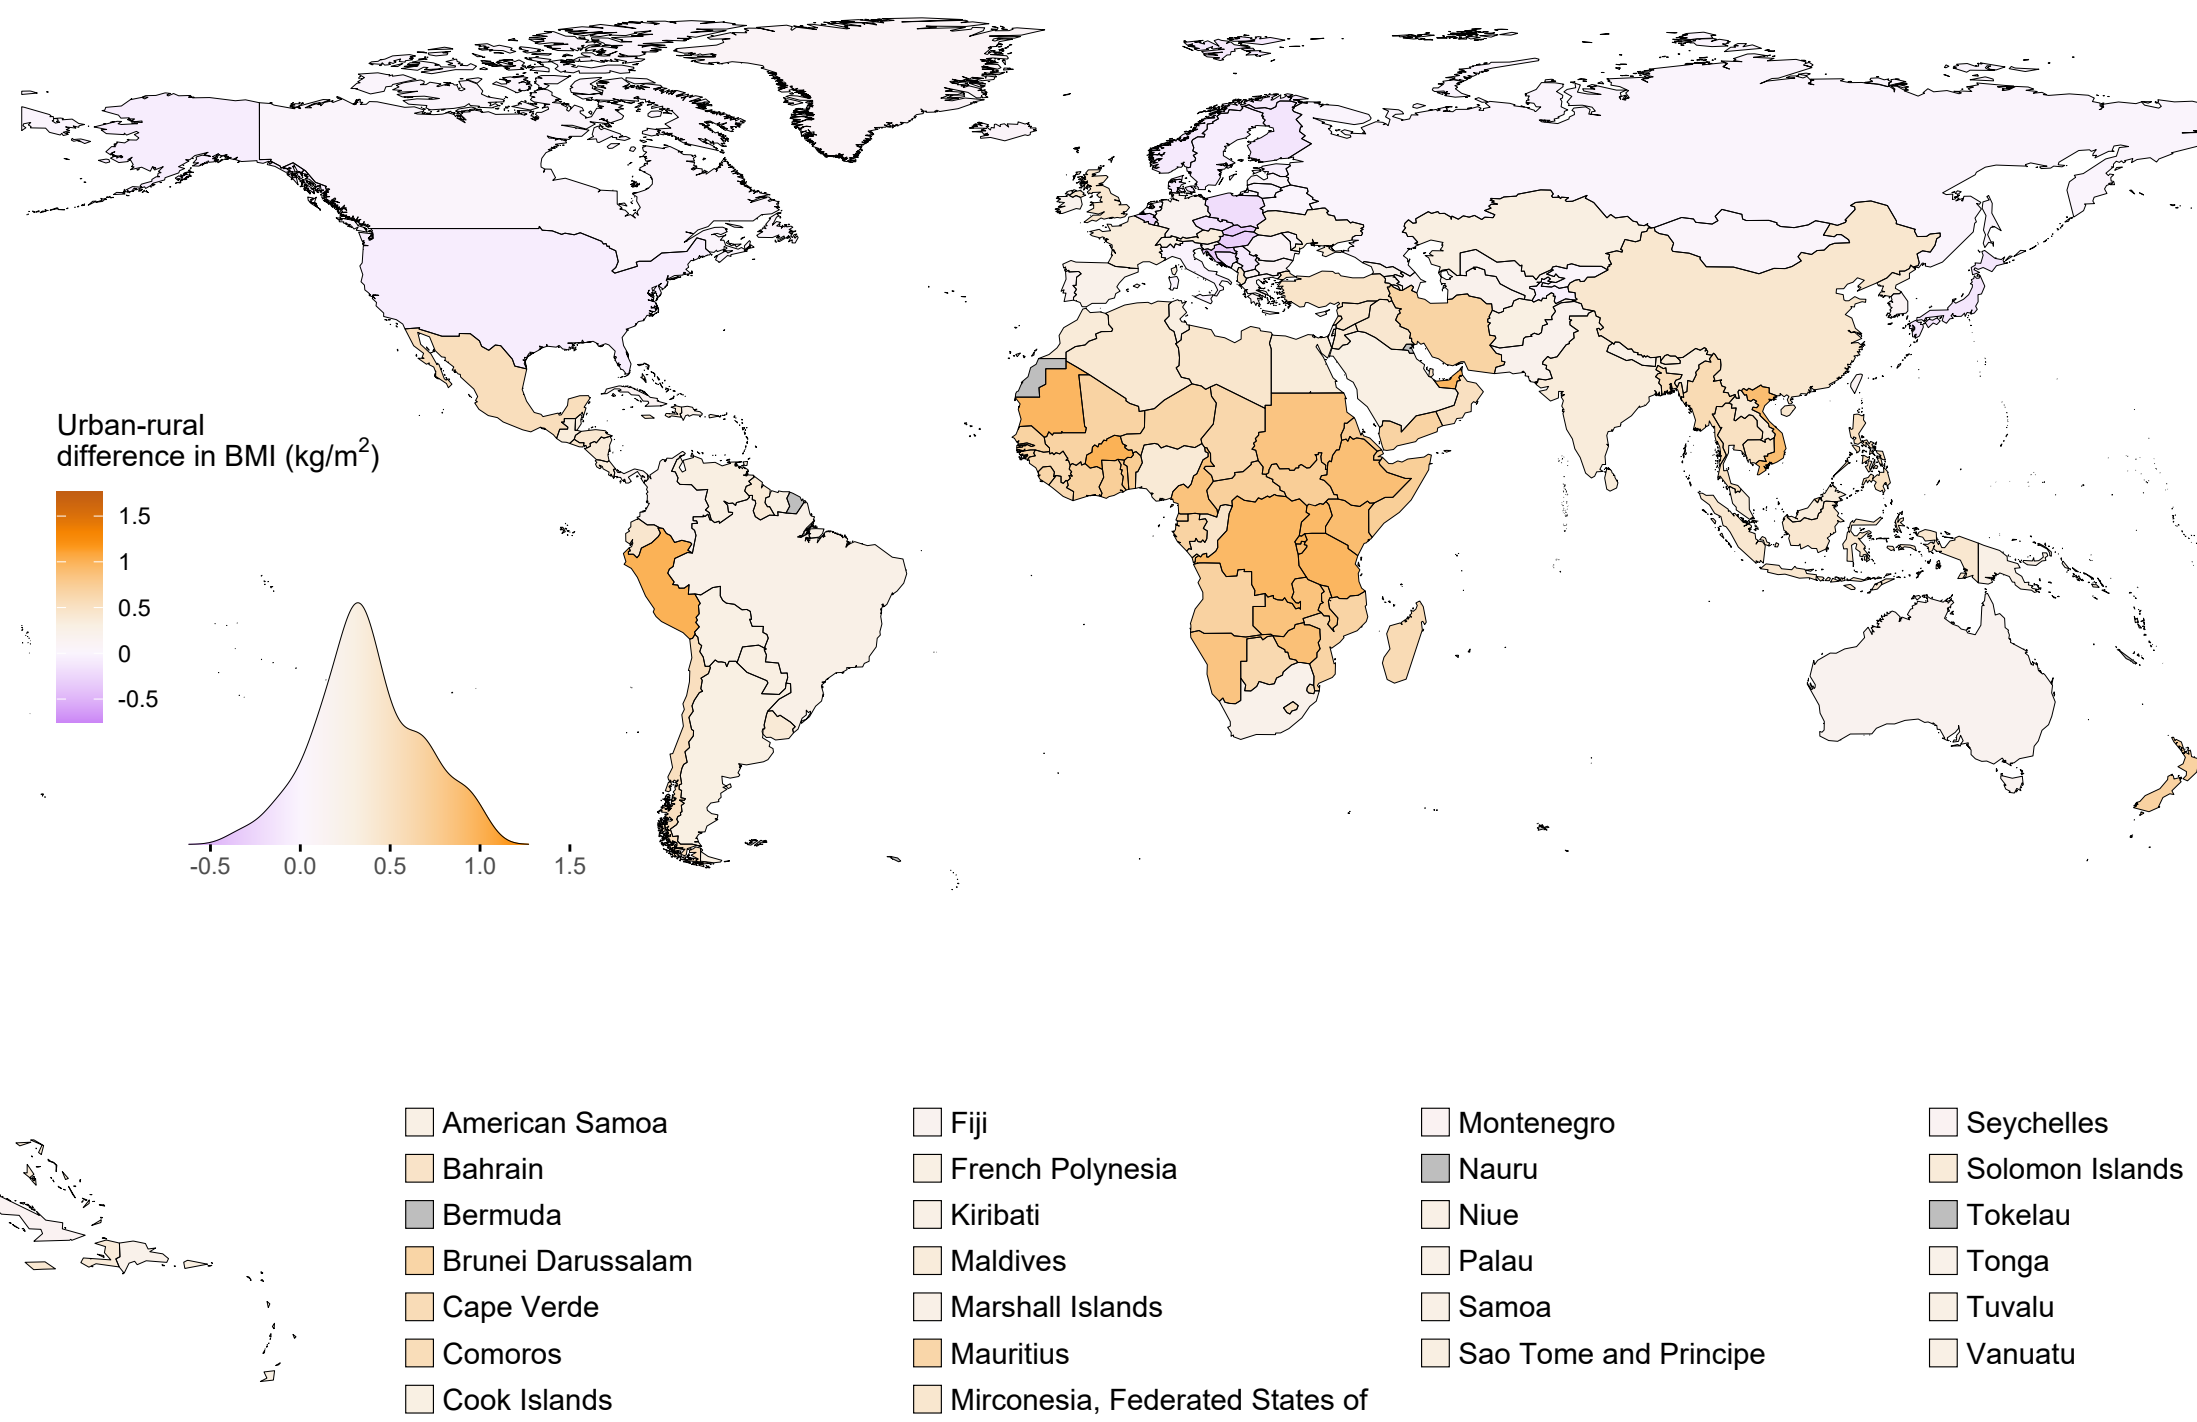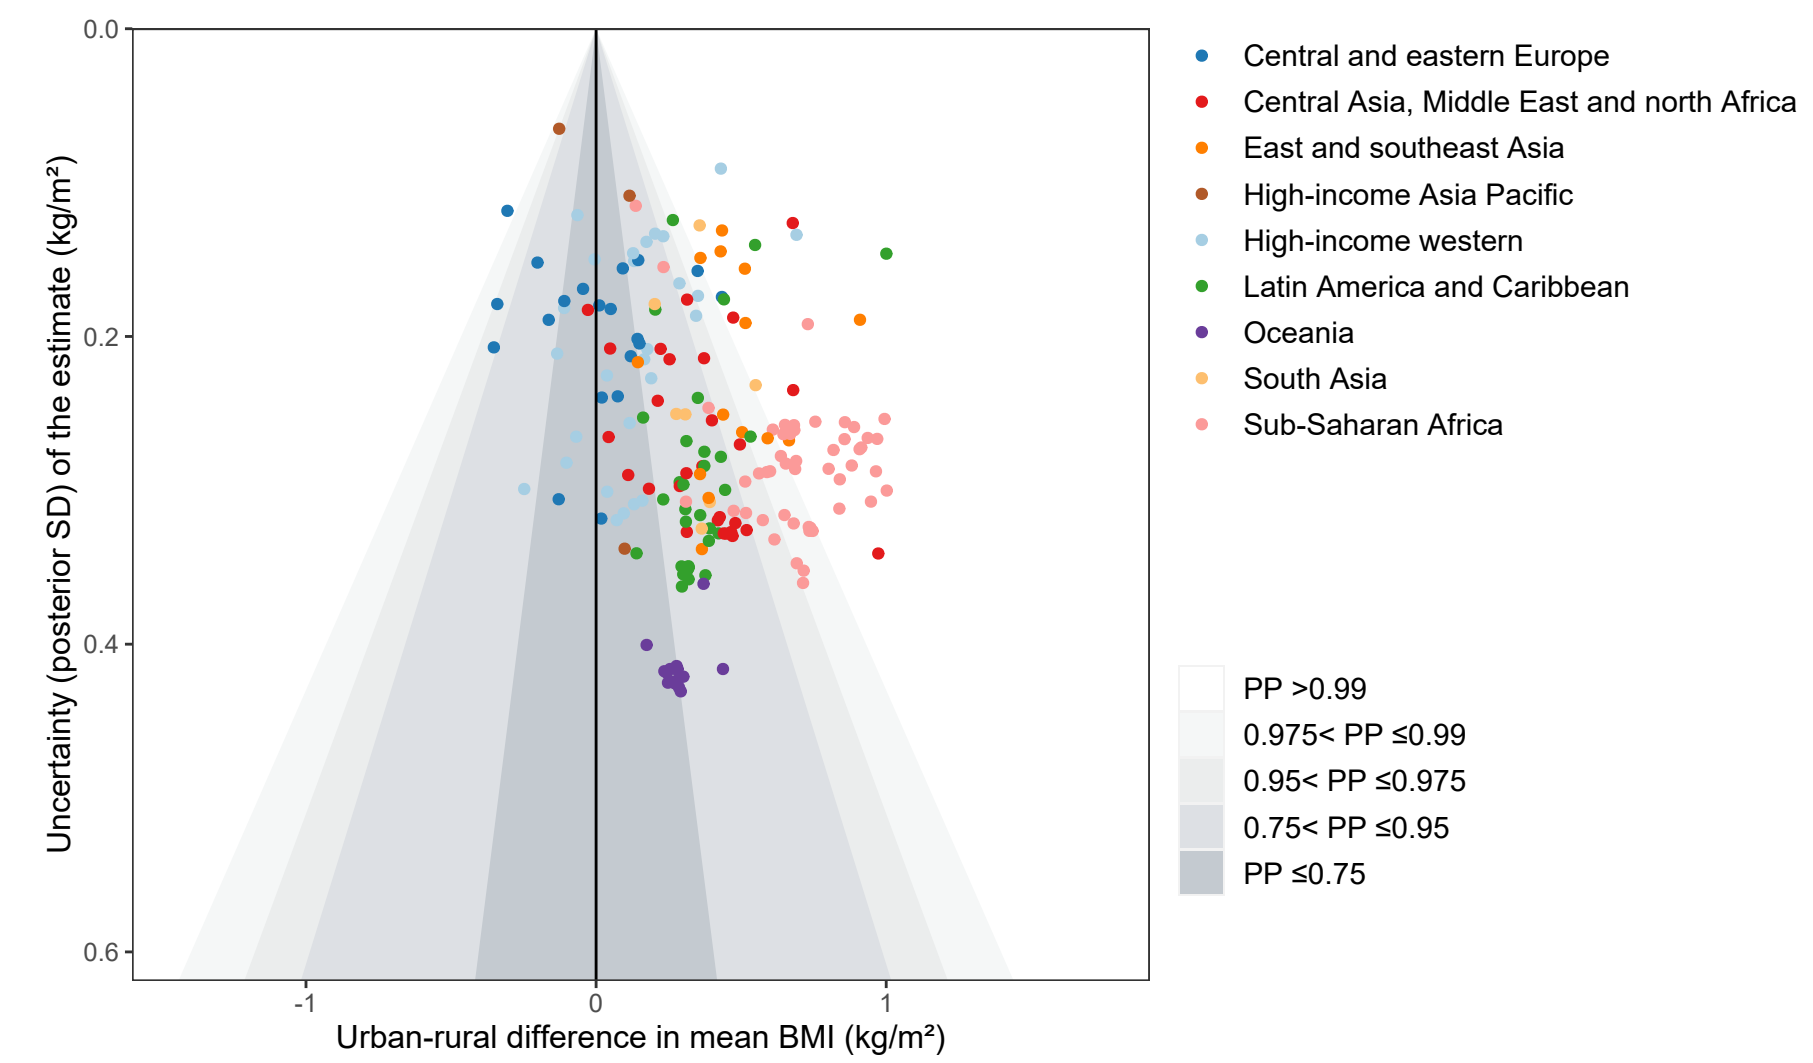

### Change 1990-2020 (girls, age 10)



### Urban-rural difference in 2020 (boys, age 10)

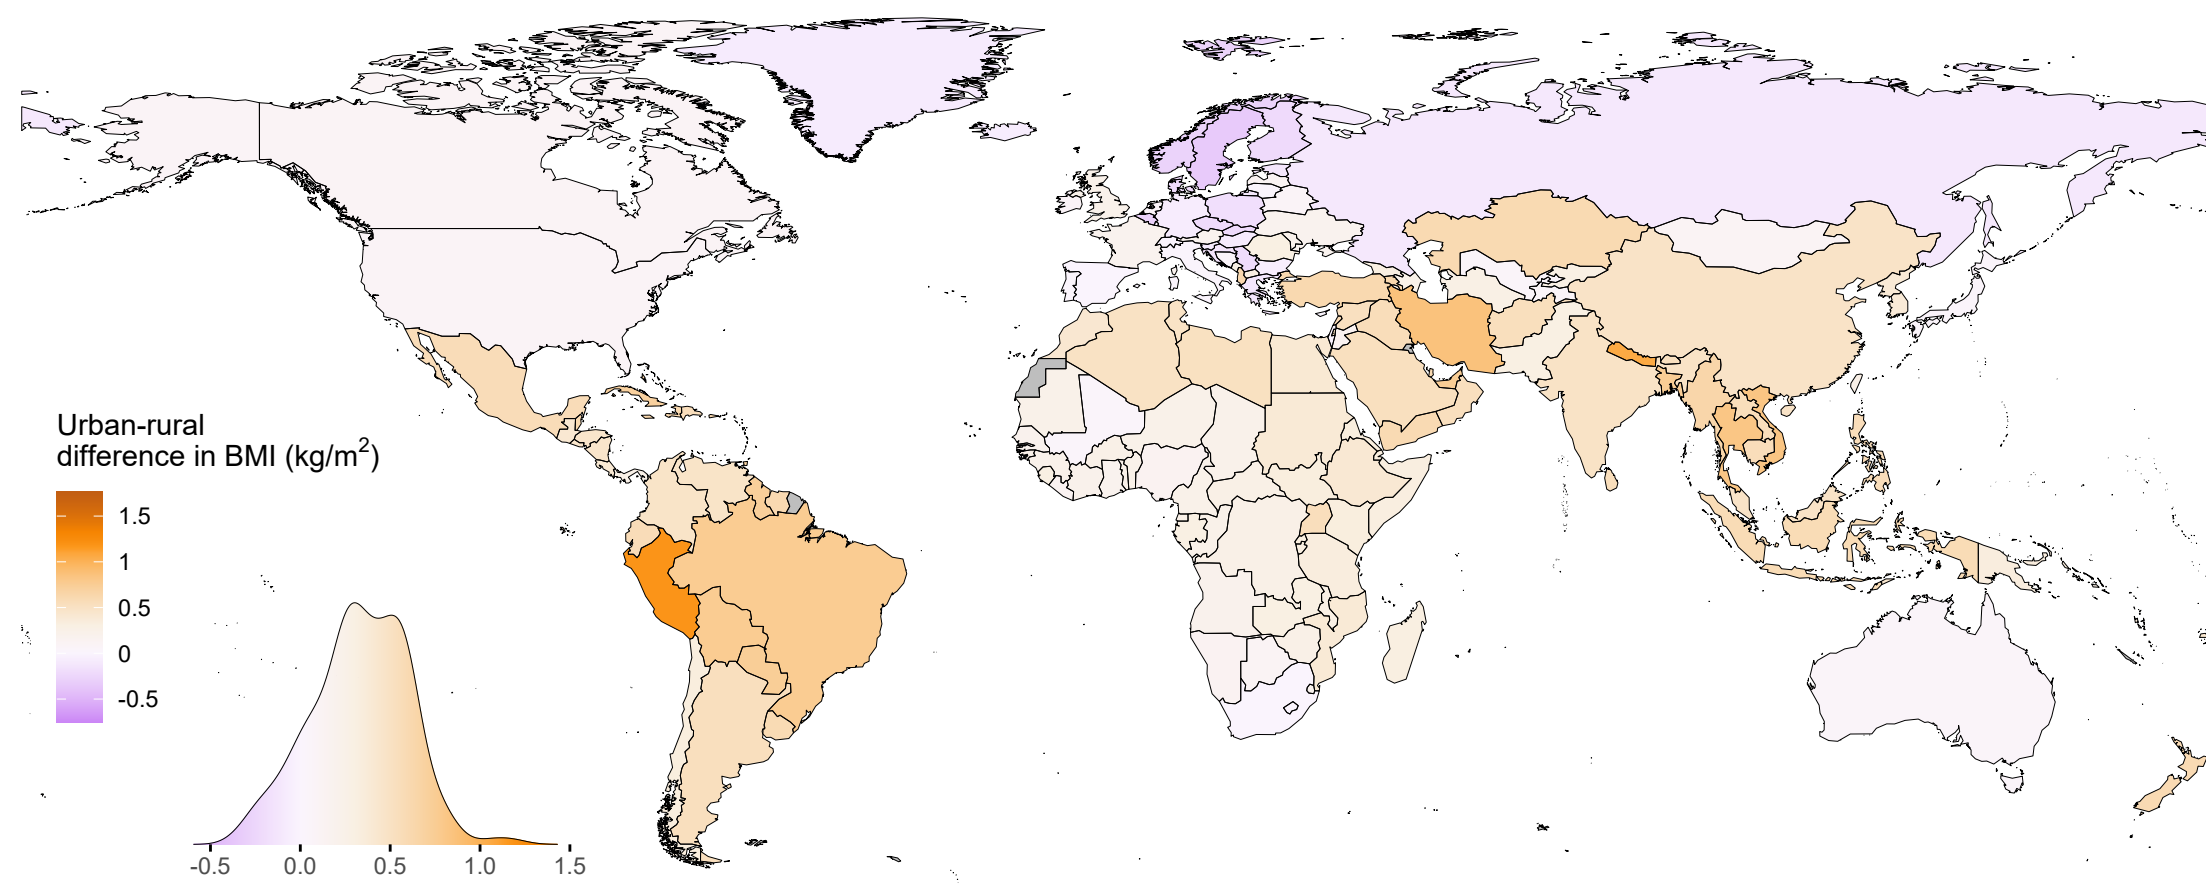

Urban-rural difference in BMI (kg/m<sup>2</sup>)

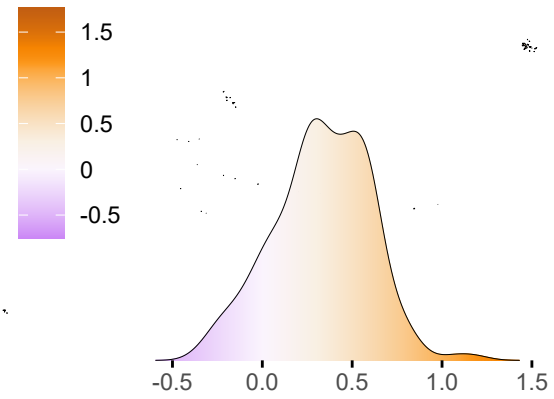

- |                   |                                 |                       |                 |
|-------------------|---------------------------------|-----------------------|-----------------|
| American Samoa    | Fiji                            | Montenegro            | Seychelles      |
| Bahrain           | French Polynesia                | Nauru                 | Solomon Islands |
| Bermuda           | Kiribati                        | Niue                  | Tokelau         |
| Brunei Darussalam | Maldives                        | Palau                 | Tonga           |
| Cape Verde        | Marshall Islands                | Samoa                 | Tuvalu          |
| Comoros           | Mauritius                       | Sao Tome and Principe | Vanuatu         |
| Cook Islands      | Mirconesia, Federated States of |                       |                 |

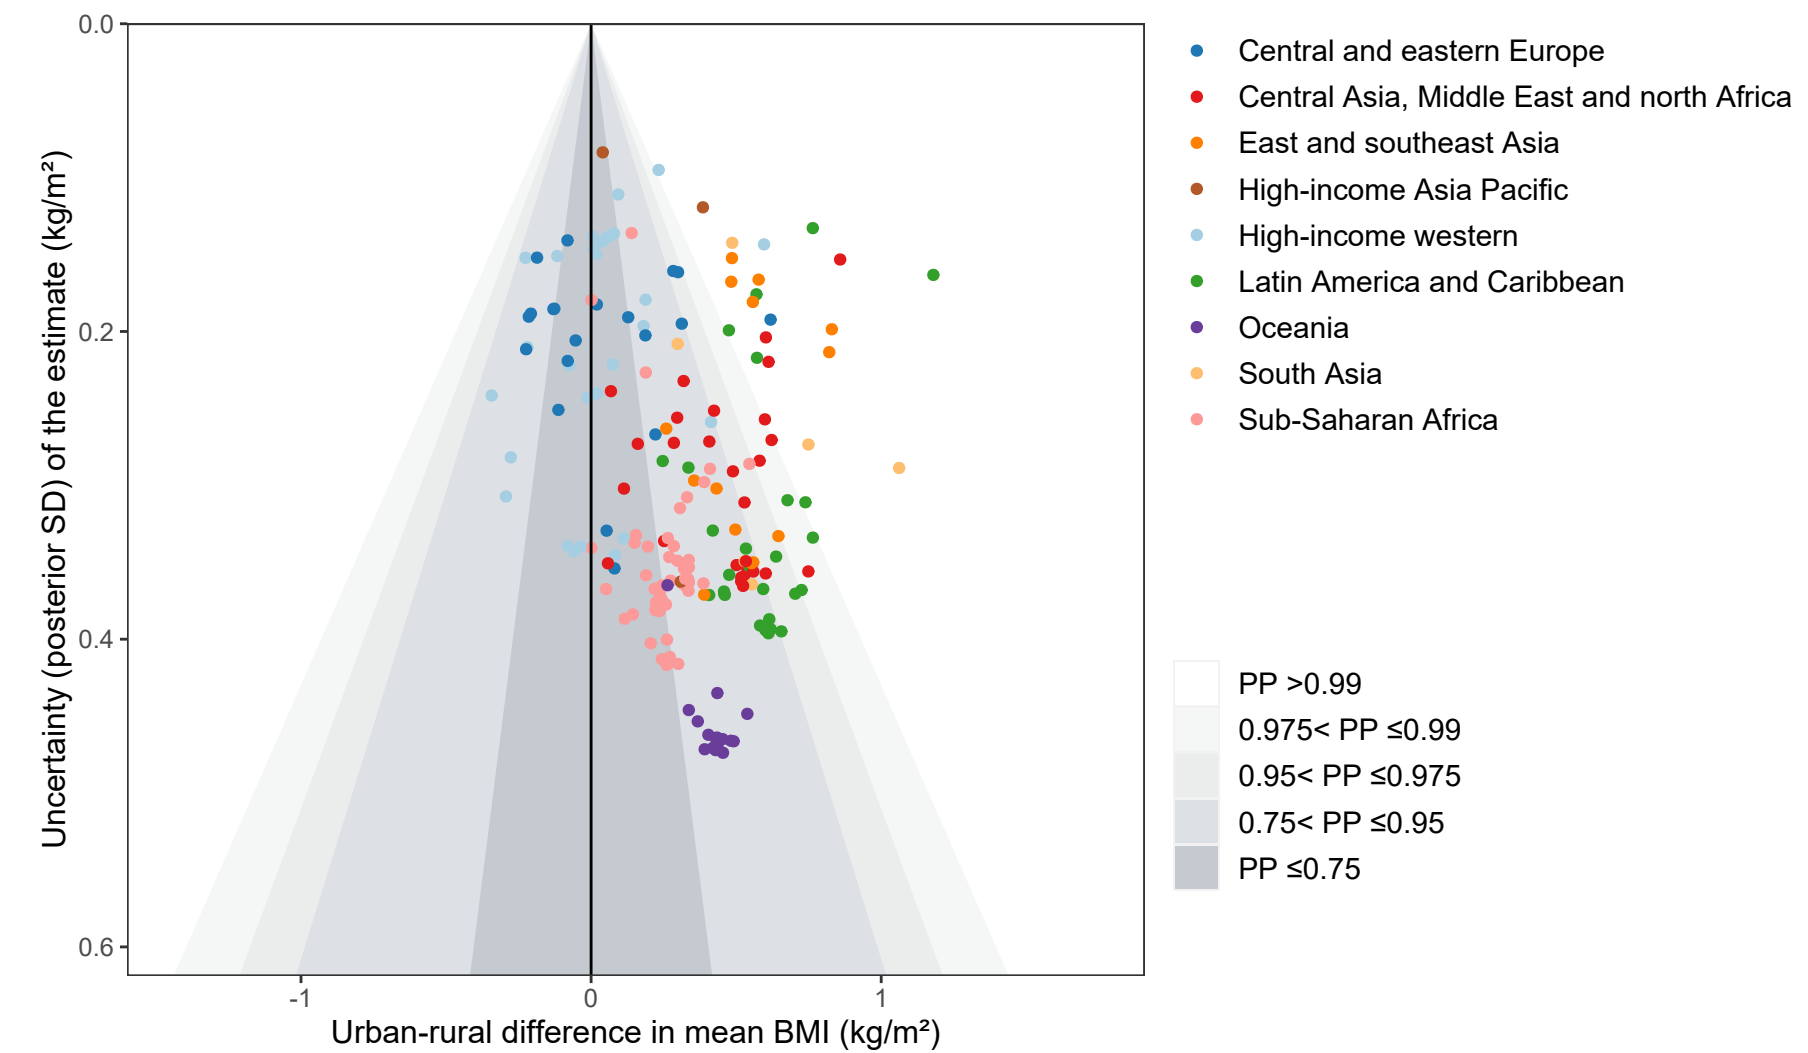

- Central and eastern Europe
- Central Asia, Middle East and north Africa
- East and southeast Asia
- High-income Asia Pacific
- High-income western
- Latin America and Caribbean
- Oceania
- South Asia
- Sub-Saharan Africa

- PP >0.99
- 0.975 < PP ≤ 0.99
- 0.95 < PP ≤ 0.975
- 0.75 < PP ≤ 0.95
- PP ≤ 0.75

### Change 1990-2020 (boys, age 10)

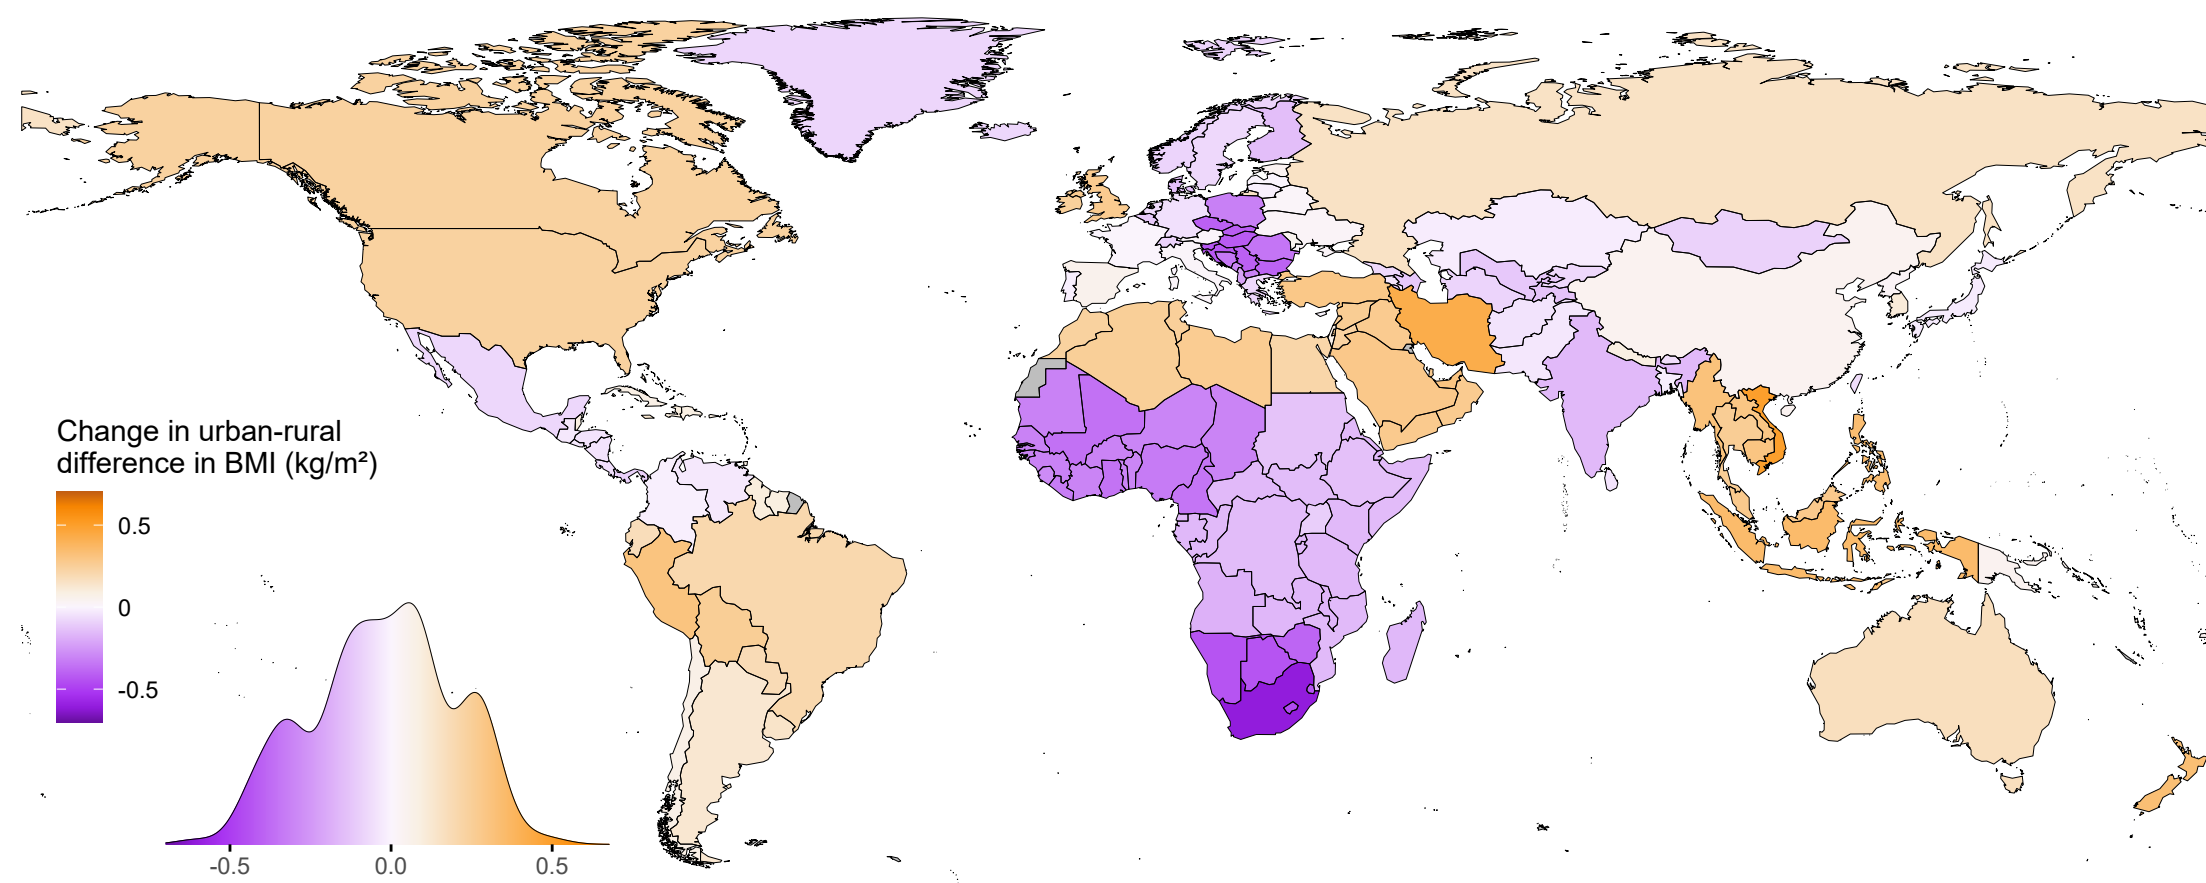

Change in urban-rural difference in BMI (kg/m<sup>2</sup>)

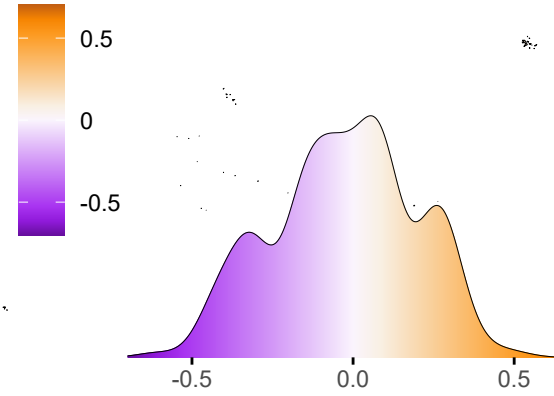

- |                   |                                 |                       |                 |
|-------------------|---------------------------------|-----------------------|-----------------|
| American Samoa    | Fiji                            | Montenegro            | Seychelles      |
| Bahrain           | French Polynesia                | Nauru                 | Solomon Islands |
| Bermuda           | Kiribati                        | Niue                  | Tokelau         |
| Brunei Darussalam | Maldives                        | Palau                 | Tonga           |
| Cape Verde        | Marshall Islands                | Samoa                 | Tuvalu          |
| Comoros           | Mauritius                       | Sao Tome and Principe | Vanuatu         |
| Cook Islands      | Mirconesia, Federated States of |                       |                 |

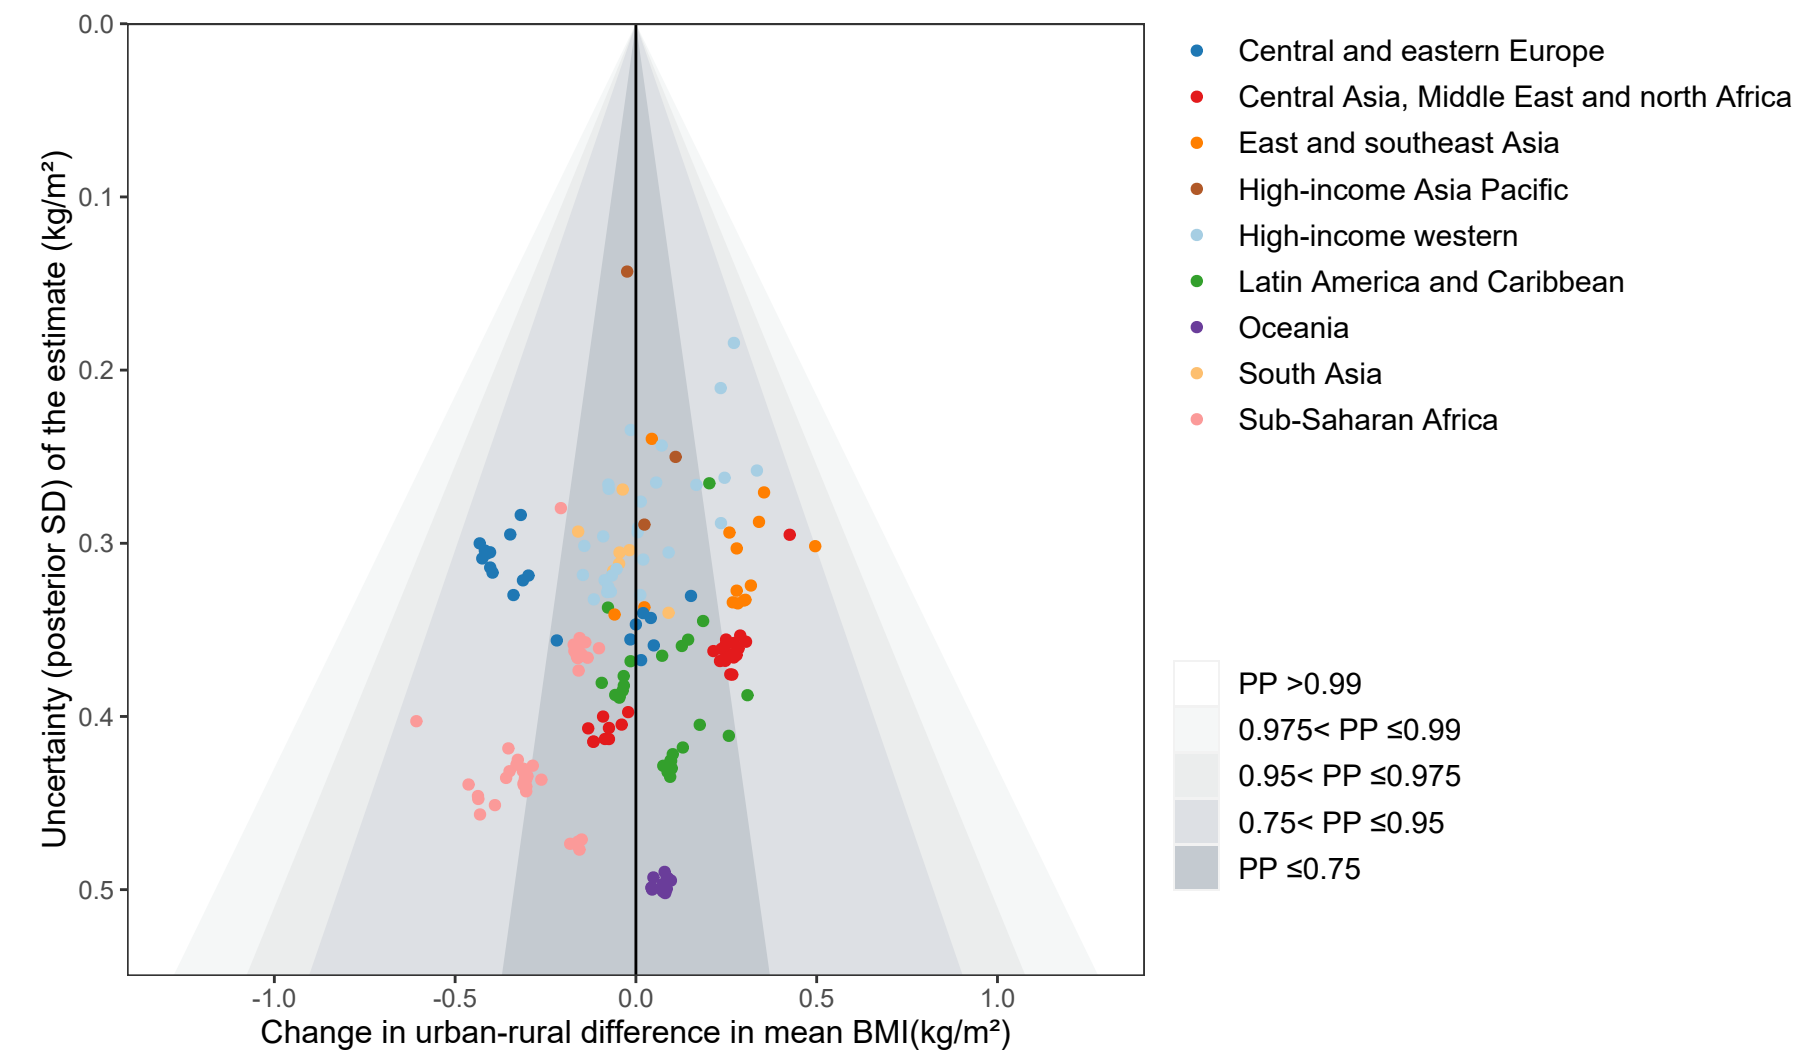

- Central and eastern Europe
- Central Asia, Middle East and north Africa
- East and southeast Asia
- High-income Asia Pacific
- High-income western
- Latin America and Caribbean
- Oceania
- South Asia
- Sub-Saharan Africa

- PP >0.99
- 0.975 < PP ≤ 0.99
- 0.95 < PP ≤ 0.975
- 0.75 < PP ≤ 0.95
- PP ≤ 0.75



### Urban-rural difference in 2020 (girls, age 15)

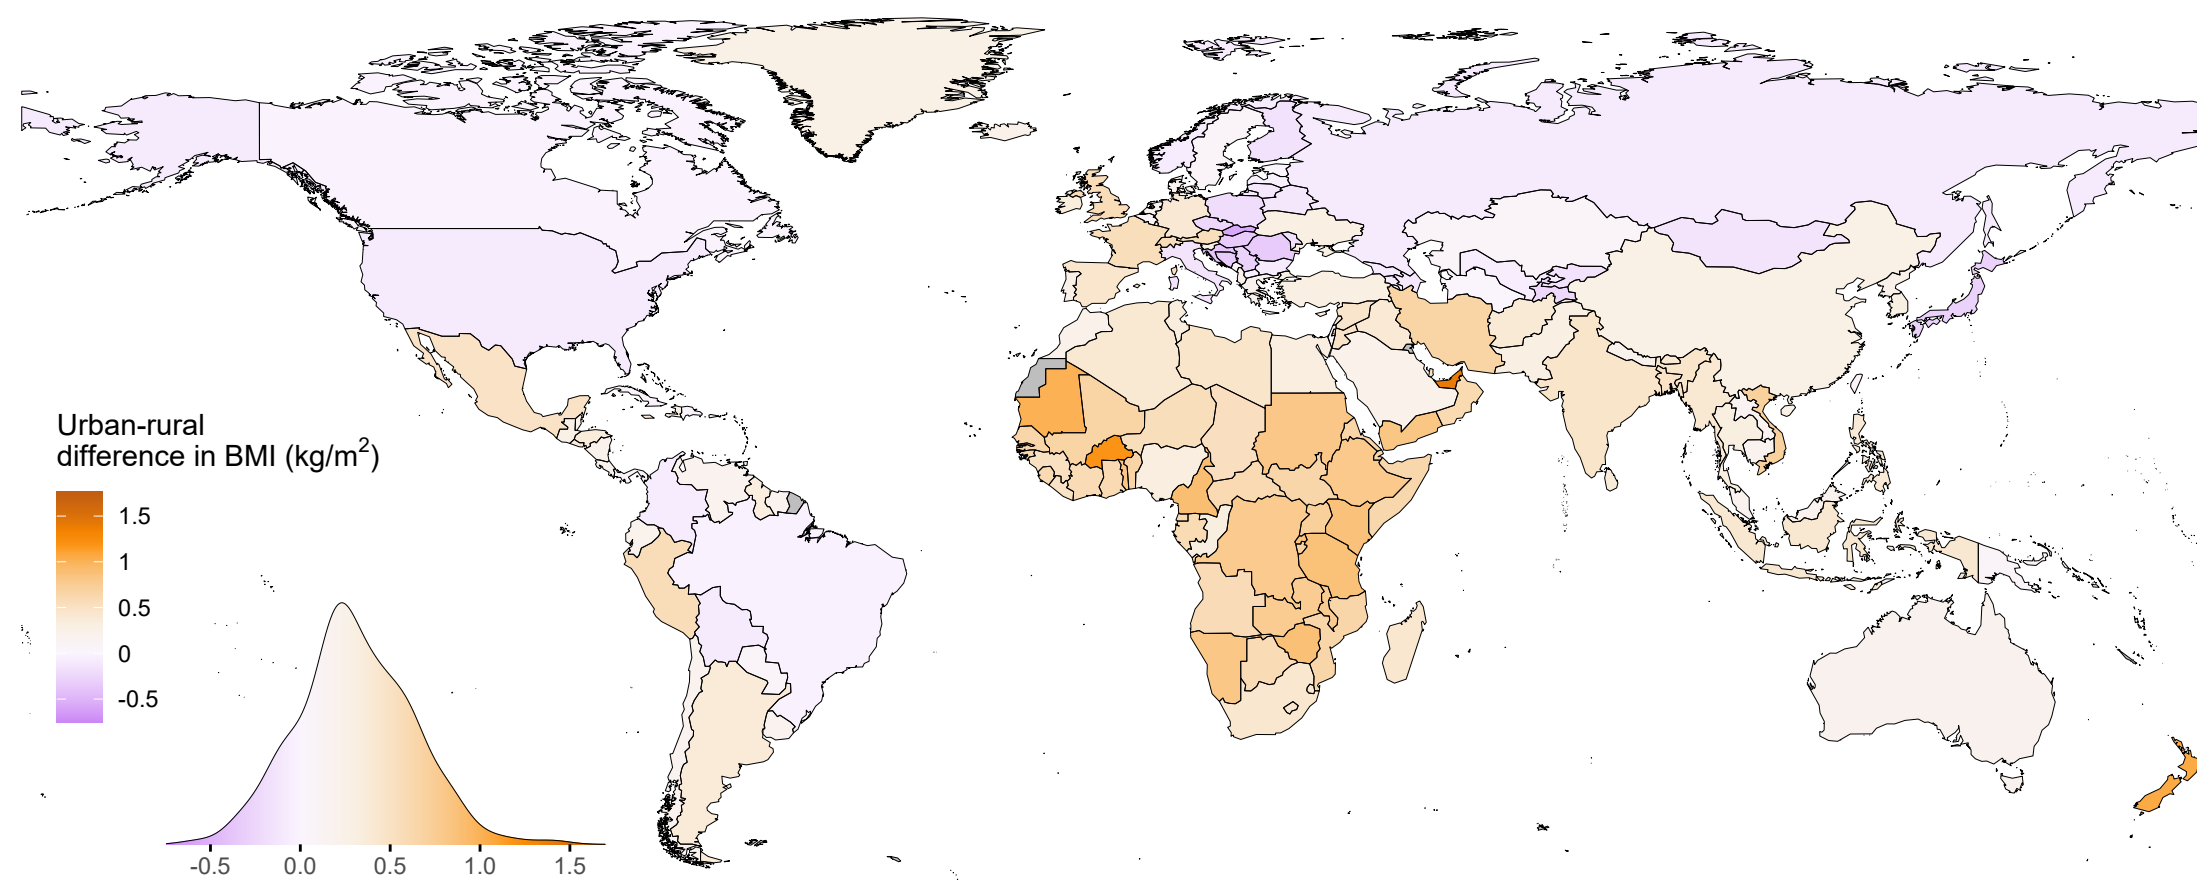

Urban-rural difference in BMI (kg/m<sup>2</sup>)

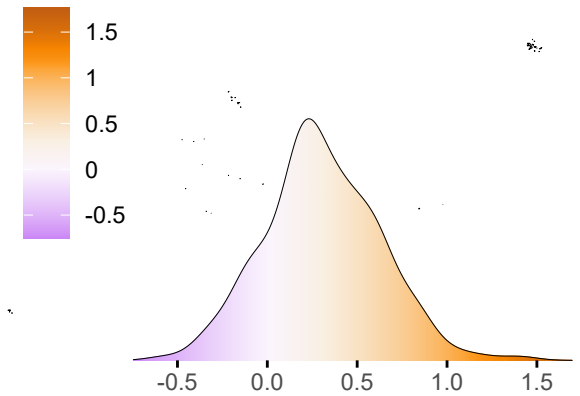

- |                                            |                                                          |                                                |                                          |
|--------------------------------------------|----------------------------------------------------------|------------------------------------------------|------------------------------------------|
| <input type="checkbox"/> American Samoa    | <input type="checkbox"/> Fiji                            | <input type="checkbox"/> Montenegro            | <input type="checkbox"/> Seychelles      |
| <input type="checkbox"/> Bahrain           | <input type="checkbox"/> French Polynesia                | <input type="checkbox"/> Nauru                 | <input type="checkbox"/> Solomon Islands |
| <input type="checkbox"/> Bermuda           | <input type="checkbox"/> Kiribati                        | <input type="checkbox"/> Niue                  | <input type="checkbox"/> Tokelau         |
| <input type="checkbox"/> Brunei Darussalam | <input type="checkbox"/> Maldives                        | <input type="checkbox"/> Palau                 | <input type="checkbox"/> Tonga           |
| <input type="checkbox"/> Cape Verde        | <input type="checkbox"/> Marshall Islands                | <input type="checkbox"/> Samoa                 | <input type="checkbox"/> Tuvalu          |
| <input type="checkbox"/> Comoros           | <input type="checkbox"/> Mauritius                       | <input type="checkbox"/> Sao Tome and Principe | <input type="checkbox"/> Vanuatu         |
| <input type="checkbox"/> Cook Islands      | <input type="checkbox"/> Micronesia, Federated States of |                                                |                                          |

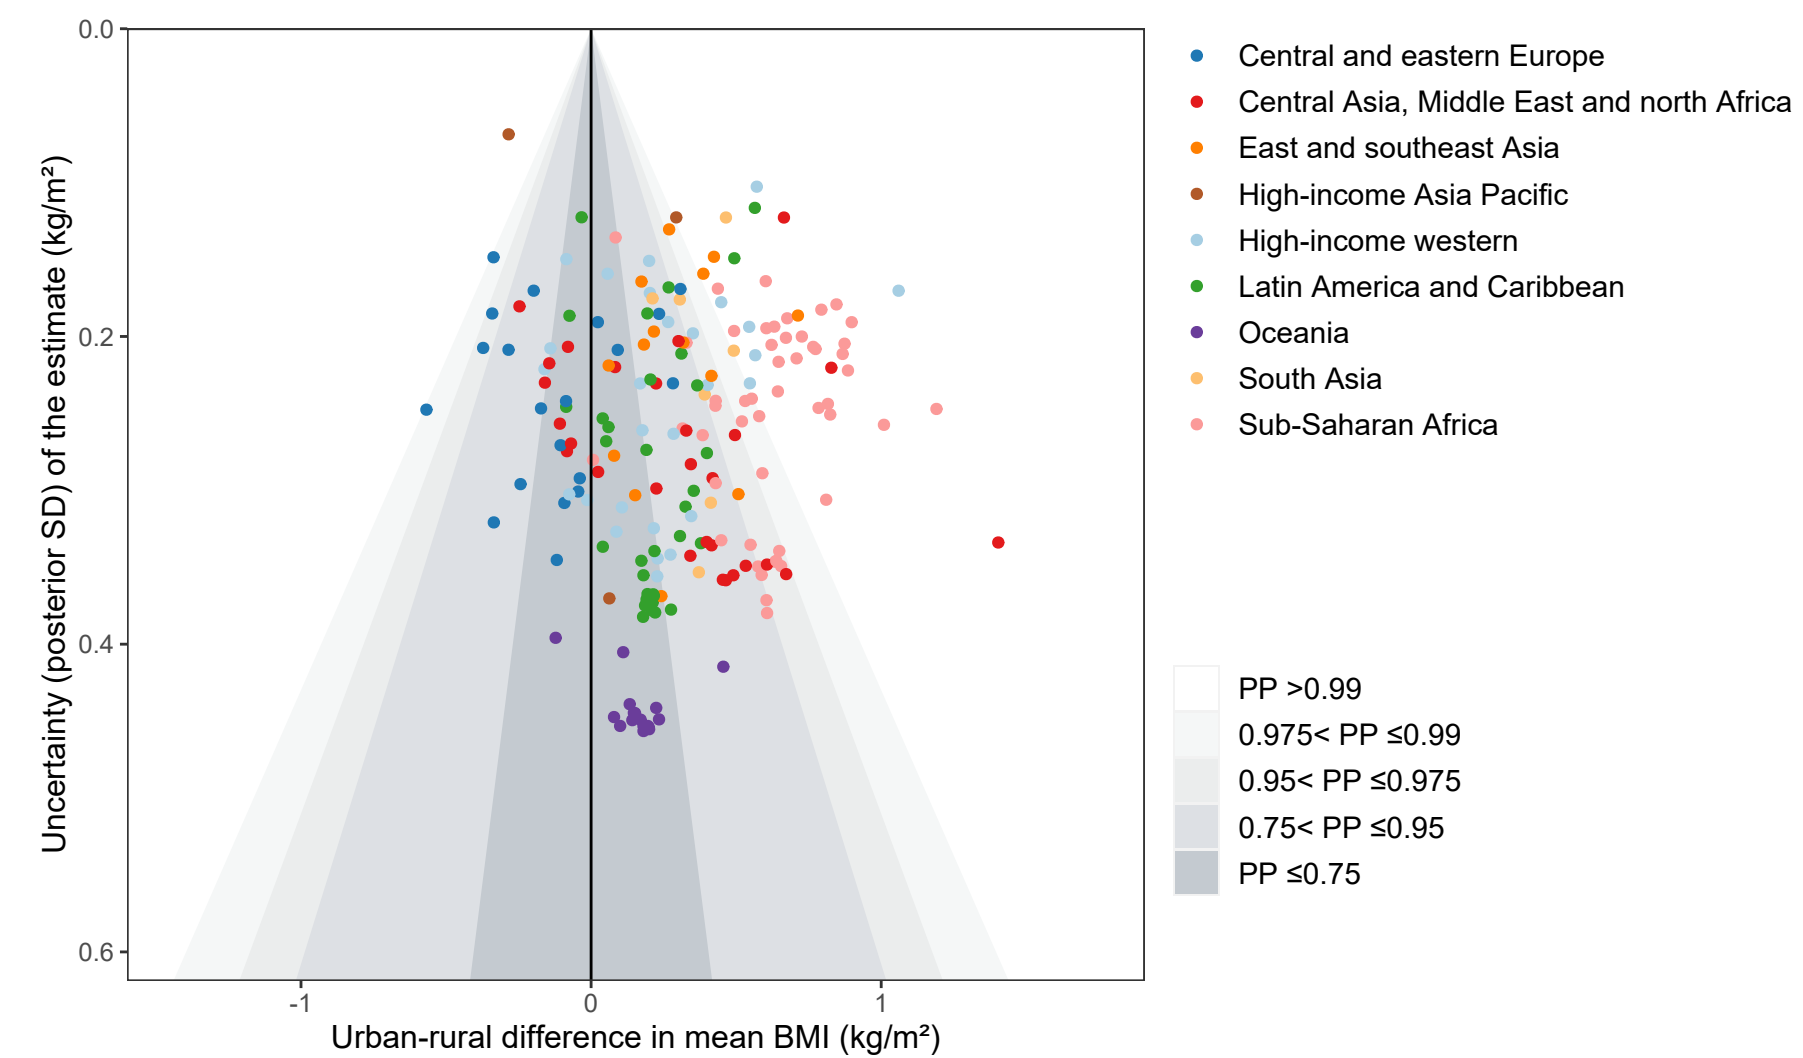

- Central and eastern Europe
- Central Asia, Middle East and north Africa
- East and southeast Asia
- High-income Asia Pacific
- High-income western
- Latin America and Caribbean
- Oceania
- South Asia
- Sub-Saharan Africa

- PP >0.99
- 0.975 < PP ≤ 0.99
- 0.95 < PP ≤ 0.975
- 0.75 < PP ≤ 0.95
- PP ≤ 0.75

### Change 1990-2020 (girls, age 15)

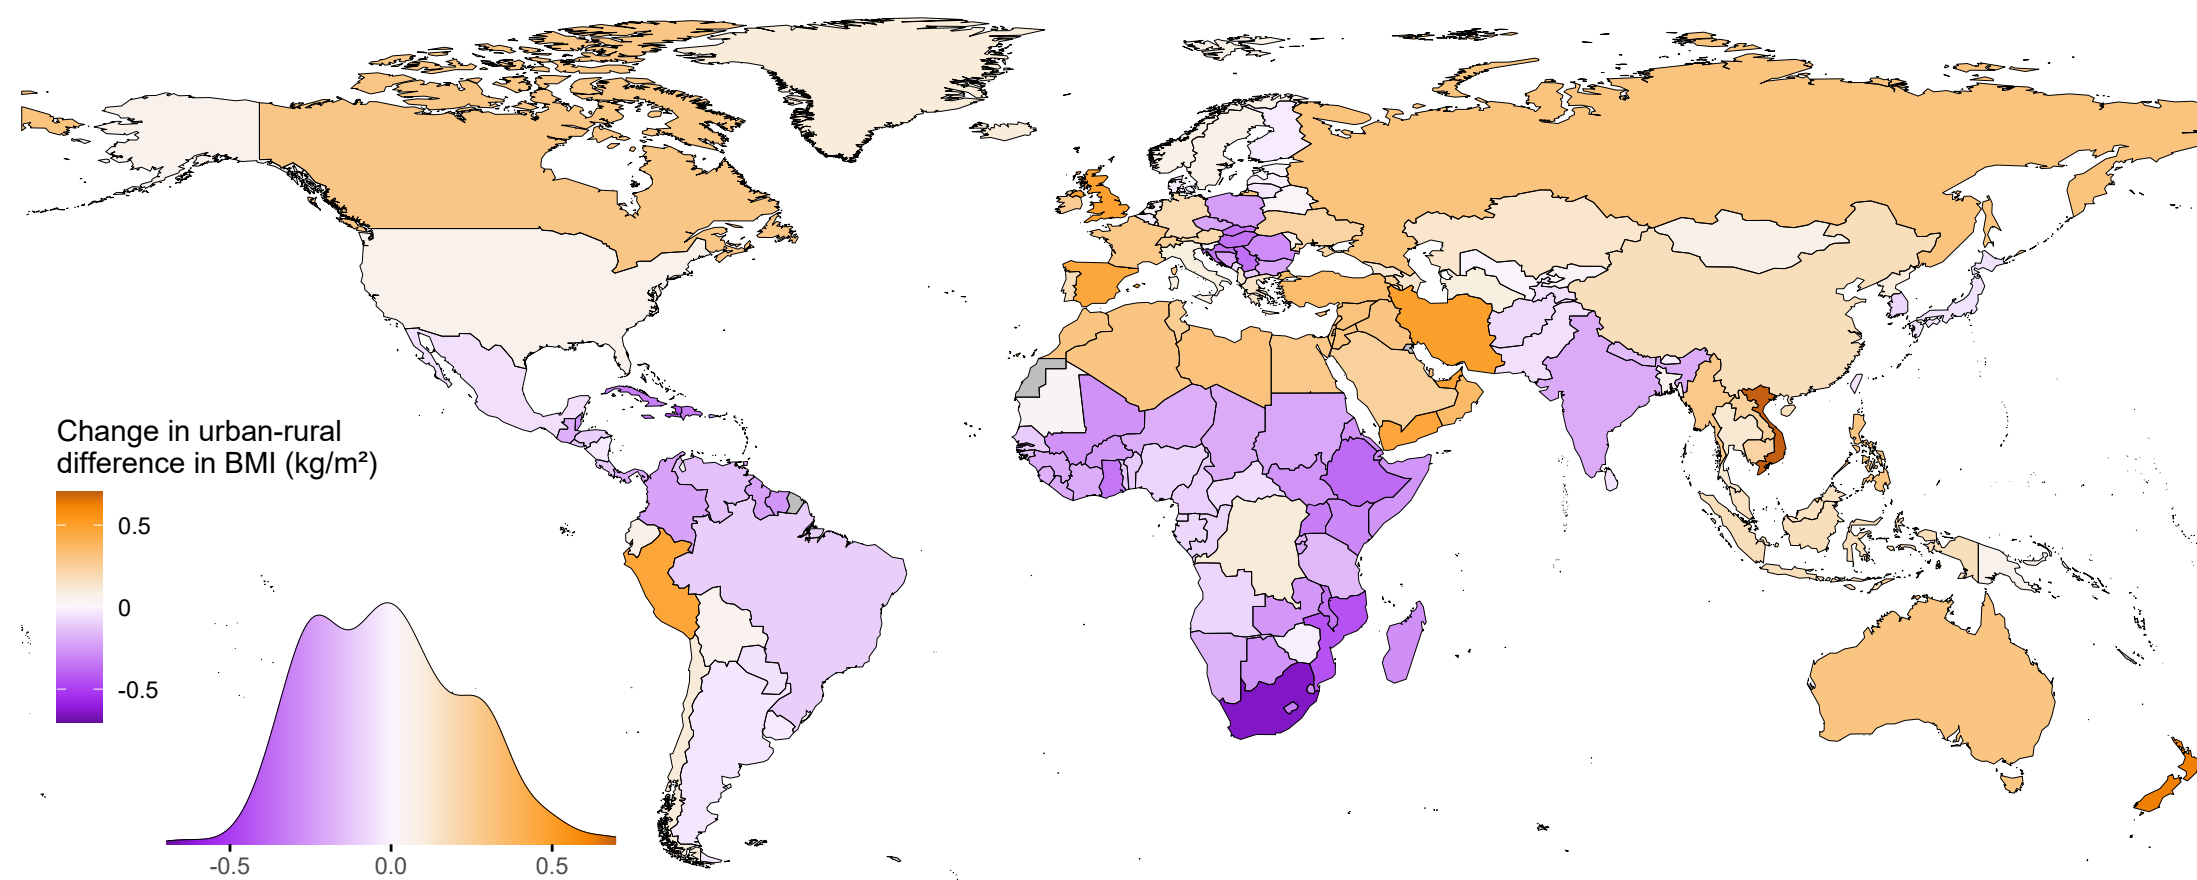

Change in urban-rural difference in BMI (kg/m<sup>2</sup>)

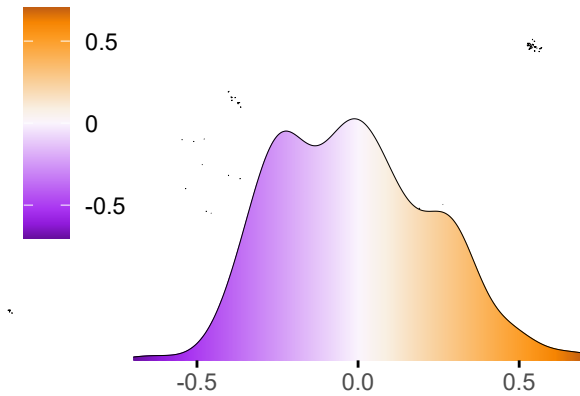

- |                                            |                                                          |                                                |                                          |
|--------------------------------------------|----------------------------------------------------------|------------------------------------------------|------------------------------------------|
| <input type="checkbox"/> American Samoa    | <input type="checkbox"/> Fiji                            | <input type="checkbox"/> Montenegro            | <input type="checkbox"/> Seychelles      |
| <input type="checkbox"/> Bahrain           | <input type="checkbox"/> French Polynesia                | <input type="checkbox"/> Nauru                 | <input type="checkbox"/> Solomon Islands |
| <input type="checkbox"/> Bermuda           | <input type="checkbox"/> Kiribati                        | <input type="checkbox"/> Niue                  | <input type="checkbox"/> Tokelau         |
| <input type="checkbox"/> Brunei Darussalam | <input type="checkbox"/> Maldives                        | <input type="checkbox"/> Palau                 | <input type="checkbox"/> Tonga           |
| <input type="checkbox"/> Cape Verde        | <input type="checkbox"/> Marshall Islands                | <input type="checkbox"/> Samoa                 | <input type="checkbox"/> Tuvalu          |
| <input type="checkbox"/> Comoros           | <input type="checkbox"/> Mauritius                       | <input type="checkbox"/> Sao Tome and Principe | <input type="checkbox"/> Vanuatu         |
| <input type="checkbox"/> Cook Islands      | <input type="checkbox"/> Micronesia, Federated States of |                                                |                                          |

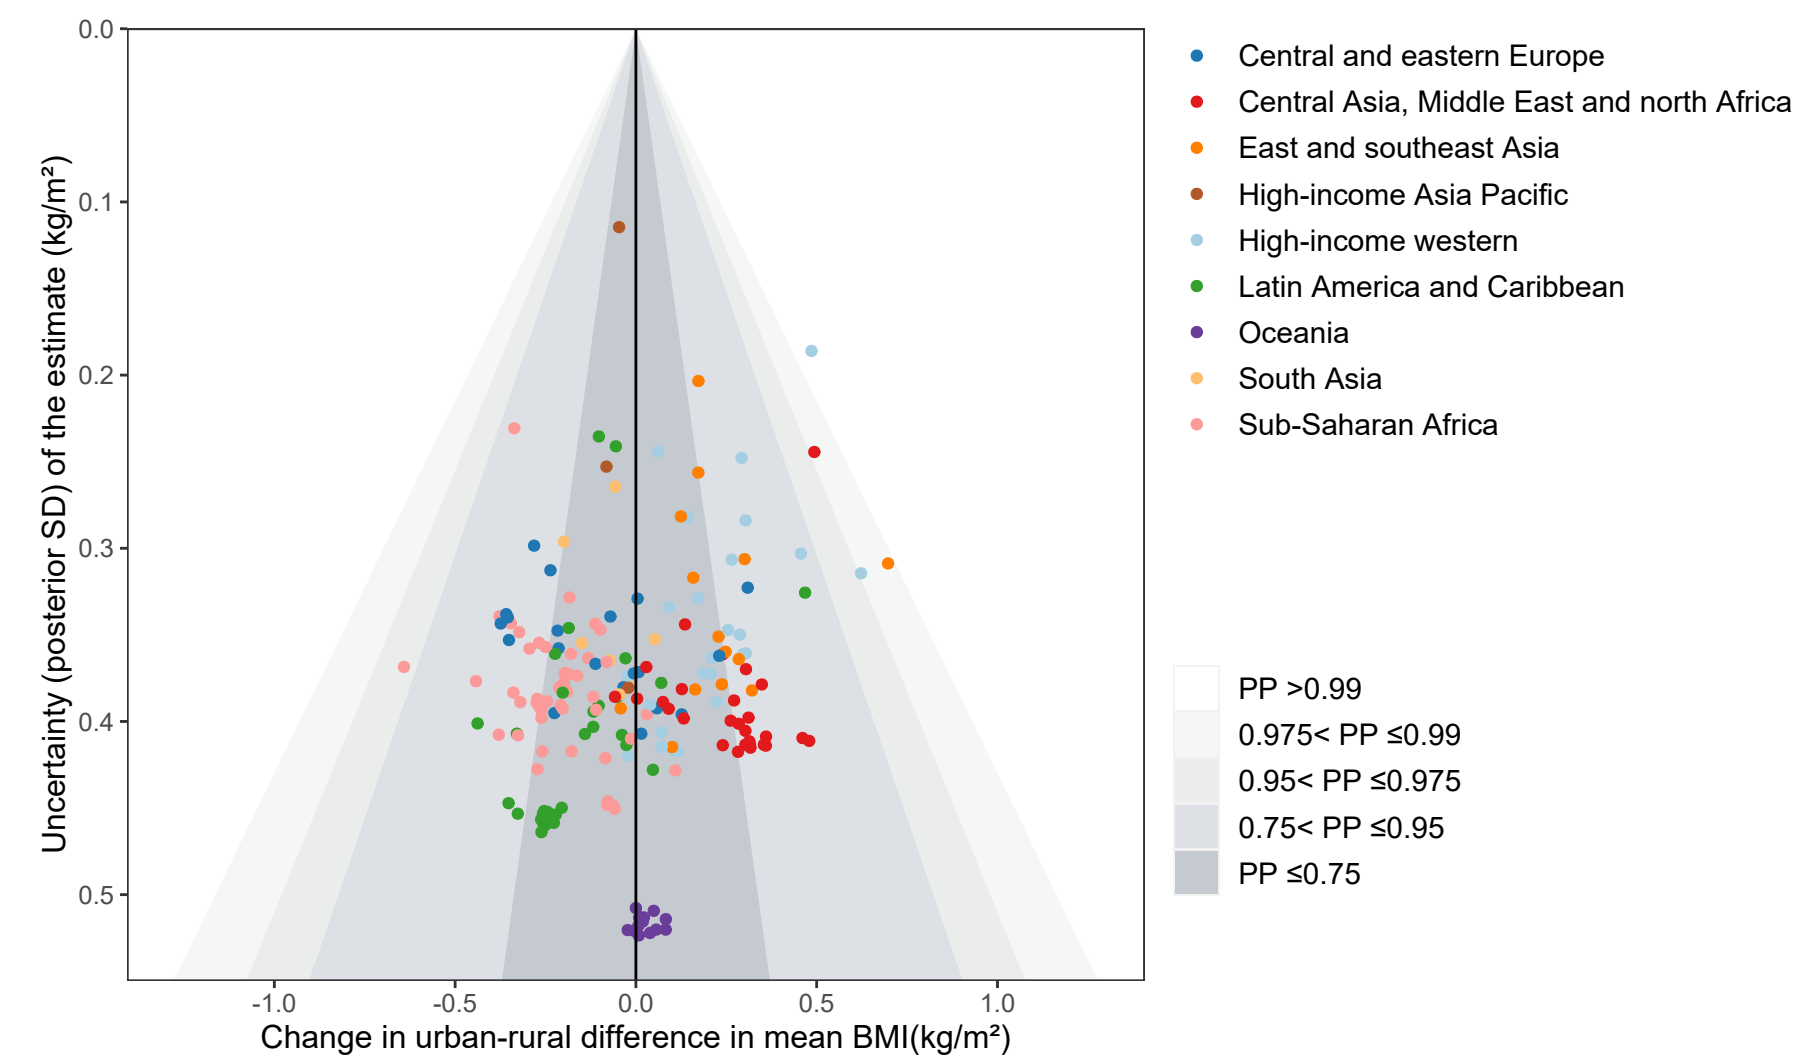

- Central and eastern Europe
- Central Asia, Middle East and north Africa
- East and southeast Asia
- High-income Asia Pacific
- High-income western
- Latin America and Caribbean
- Oceania
- South Asia
- Sub-Saharan Africa

- PP >0.99
- 0.975 < PP ≤ 0.99
- 0.95 < PP ≤ 0.975
- 0.75 < PP ≤ 0.95
- PP ≤ 0.75

### Urban-rural difference in 2020 (boys, age 15)

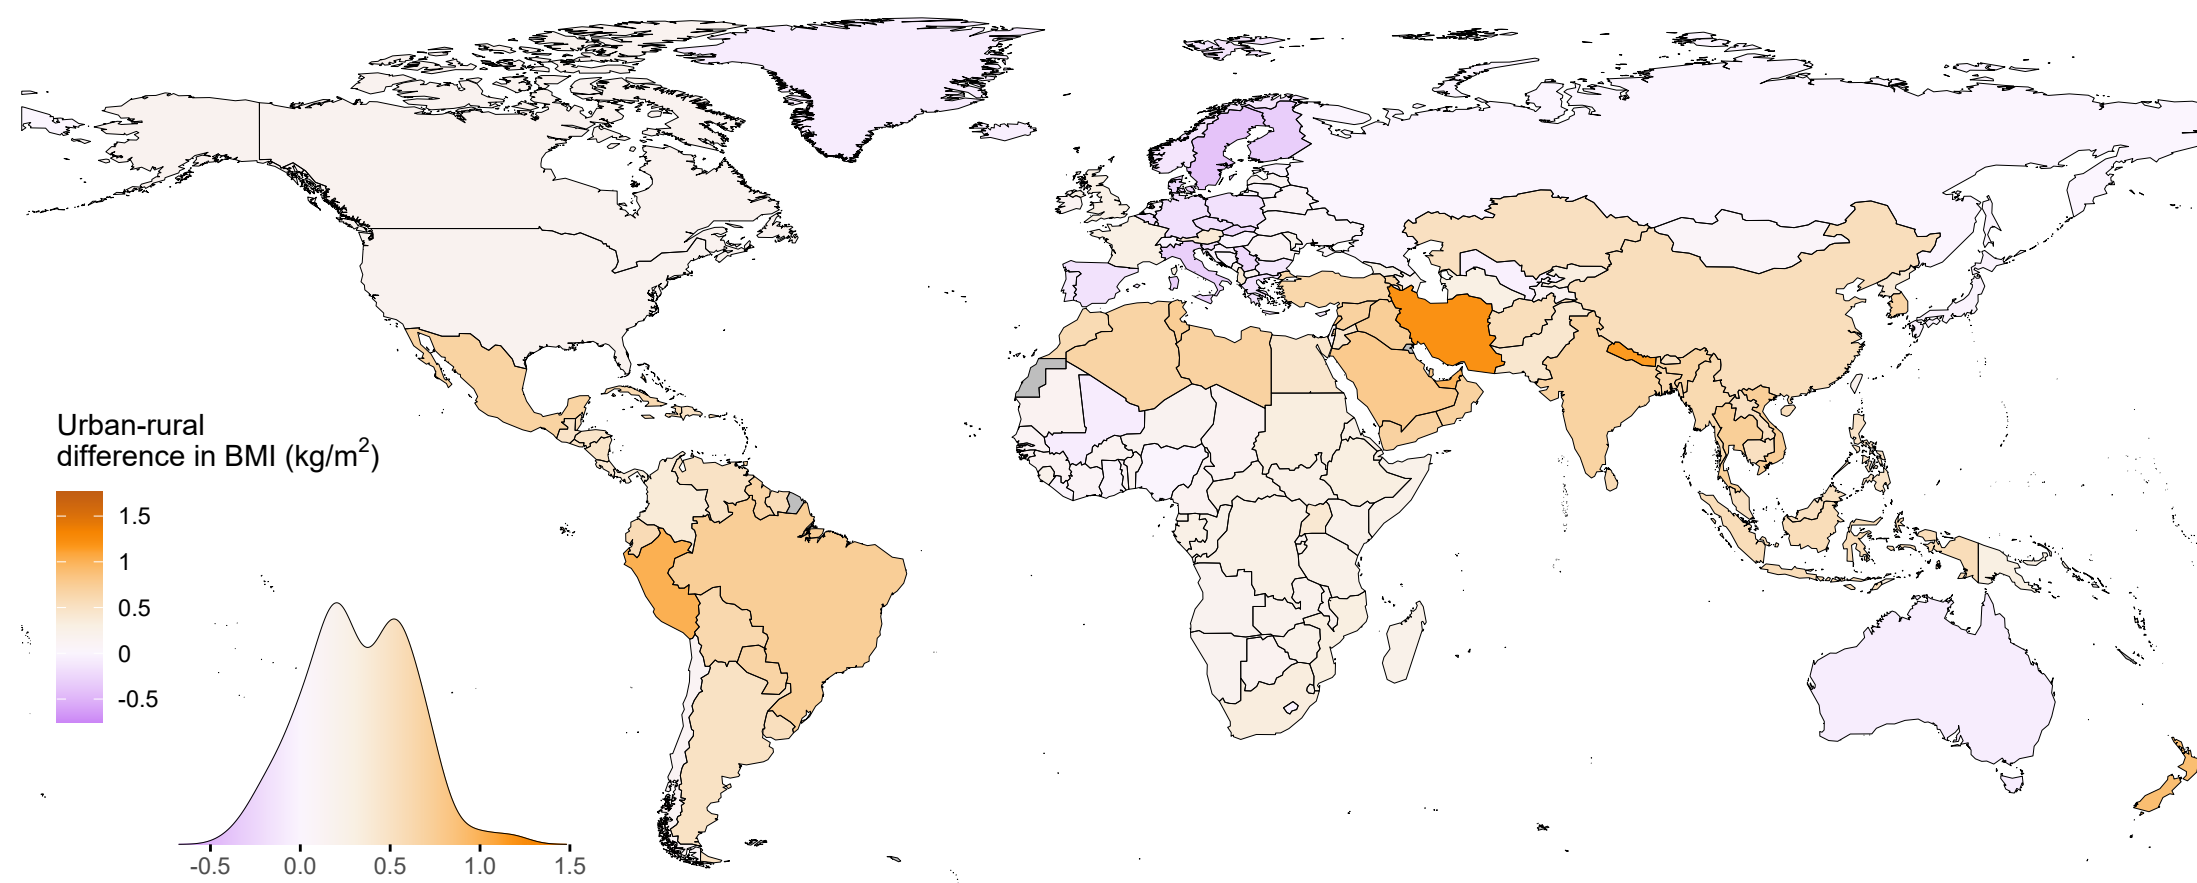

Urban-rural difference in BMI (kg/m<sup>2</sup>)

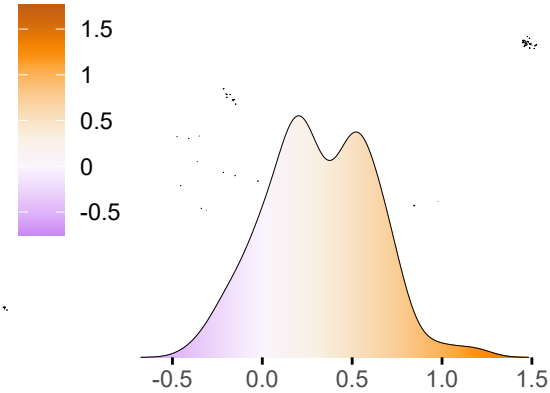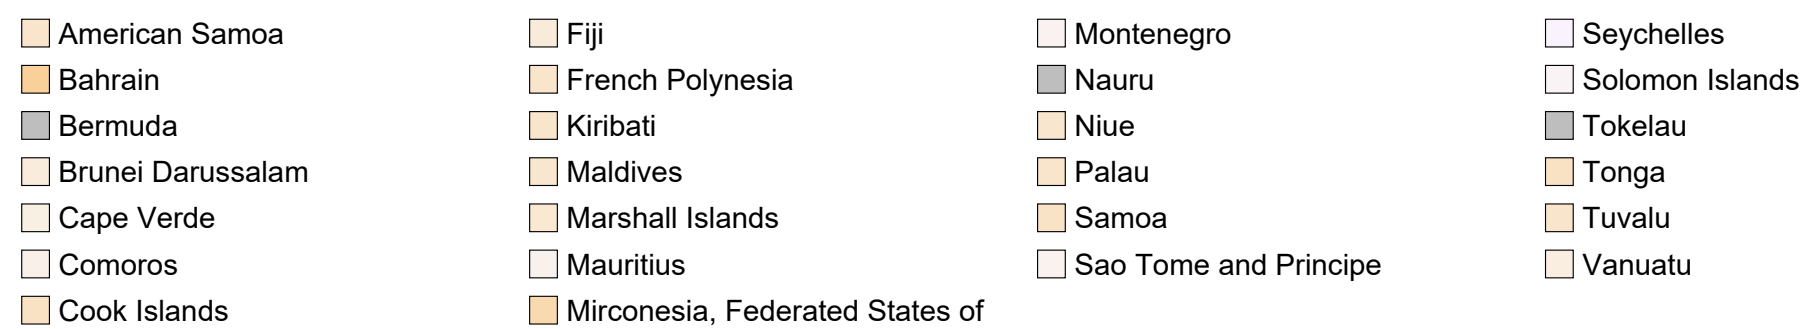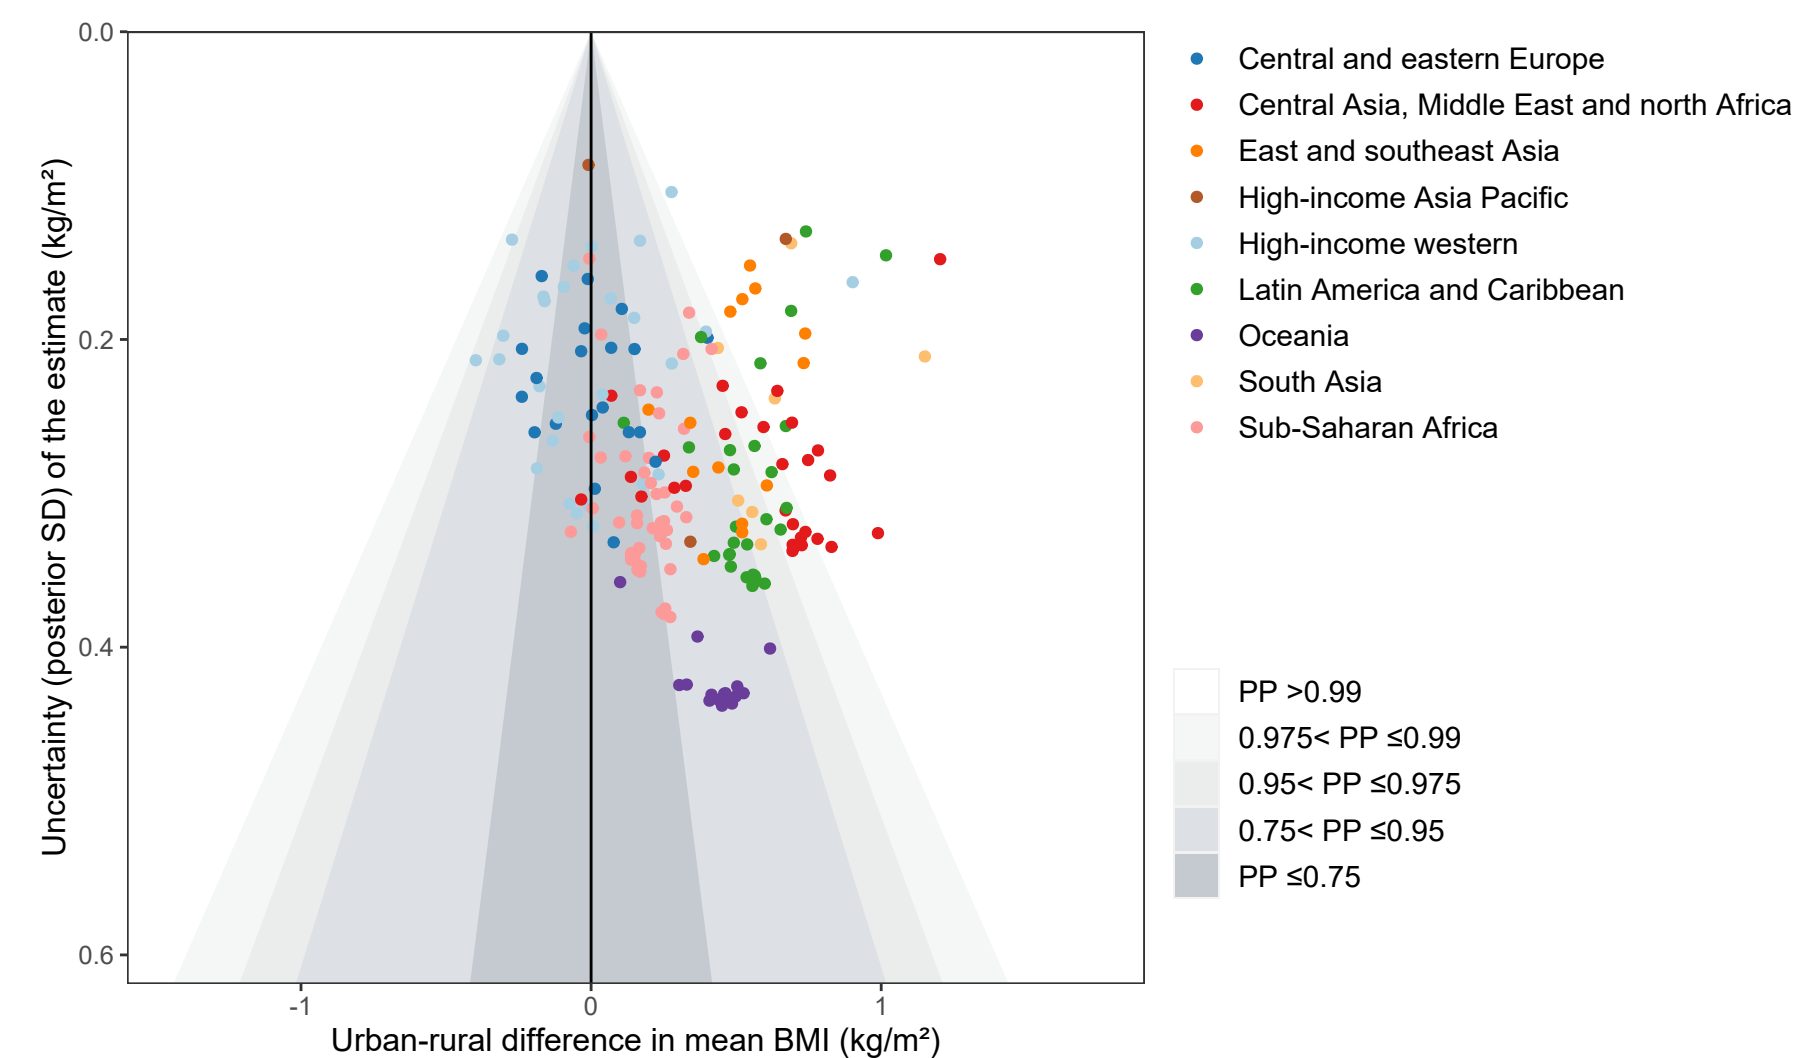

- Central and eastern Europe
- Central Asia, Middle East and north Africa
- East and southeast Asia
- High-income Asia Pacific
- High-income western
- Latin America and Caribbean
- Oceania
- South Asia
- Sub-Saharan Africa

- PP >0.99
- 0.975 < PP ≤ 0.99
- 0.95 < PP ≤ 0.975
- 0.75 < PP ≤ 0.95
- PP ≤ 0.75

### Change 1990-2020 (boys, age 15)

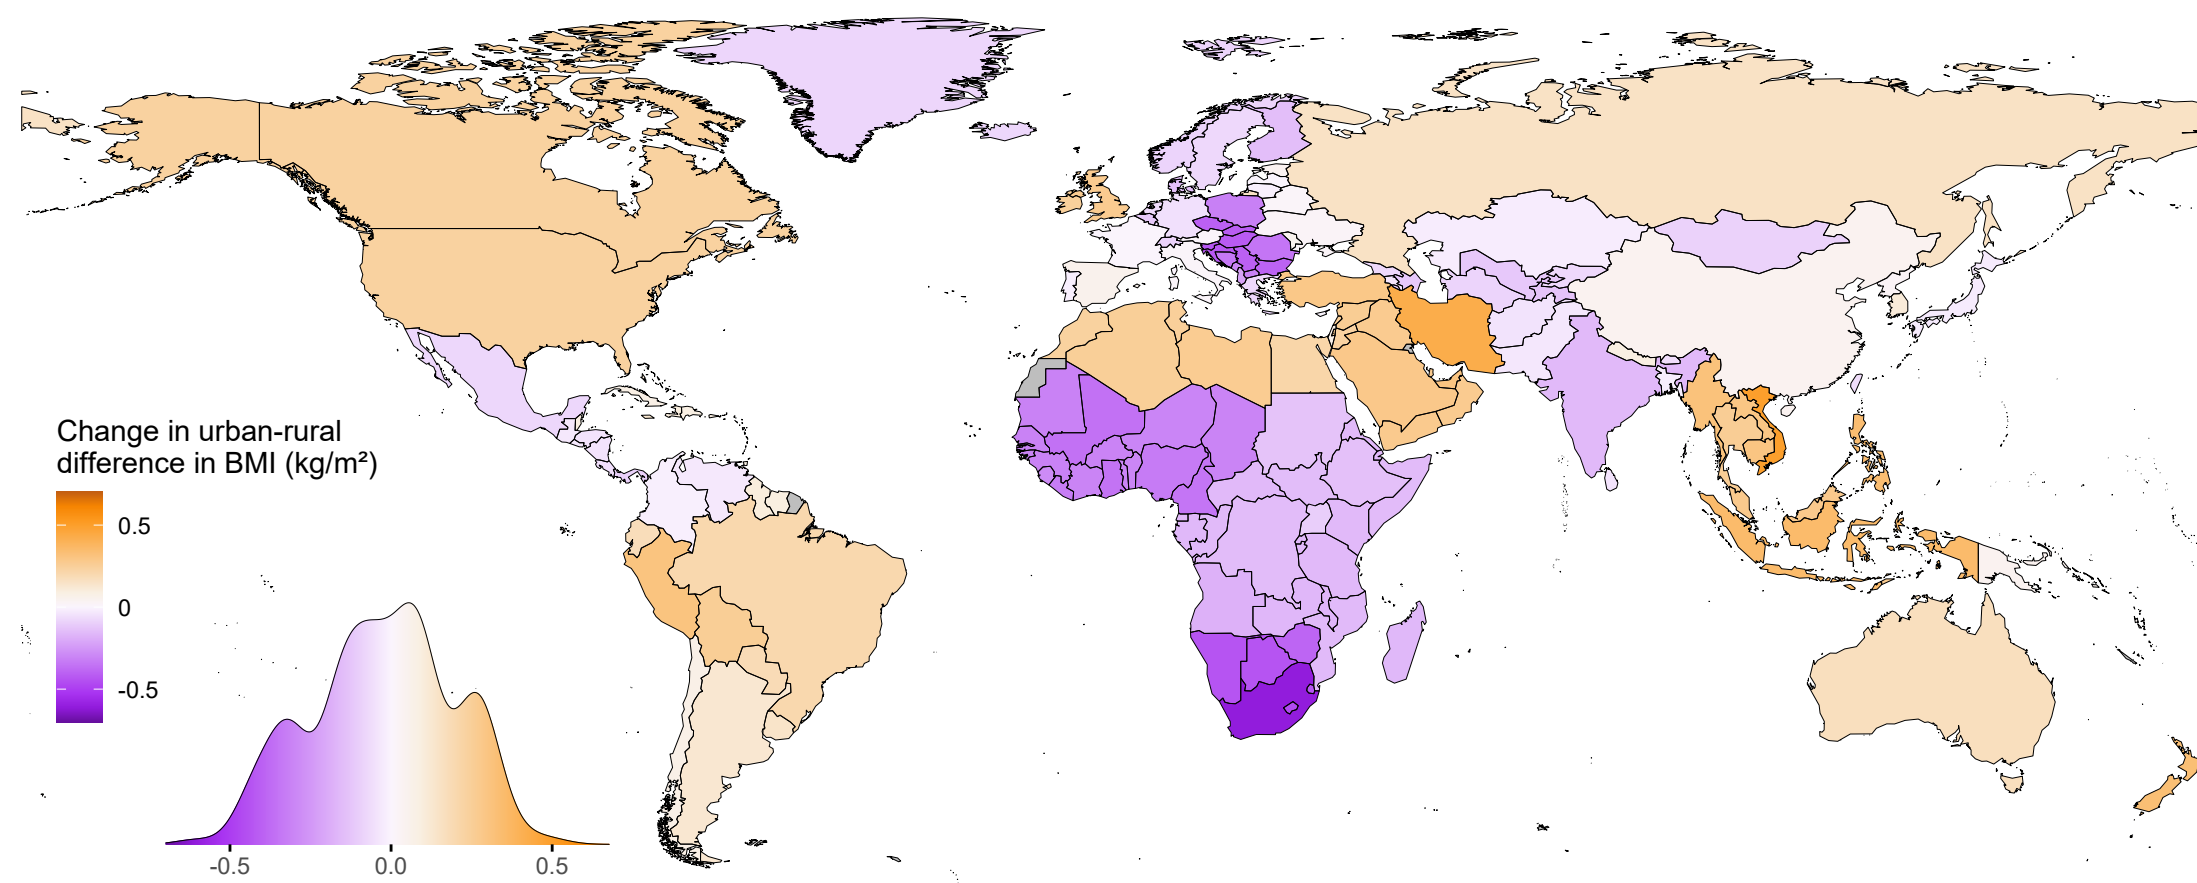

Change in urban-rural difference in BMI (kg/m<sup>2</sup>)

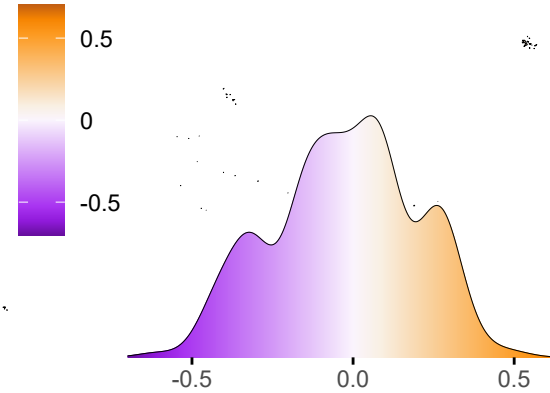

- Central and eastern Europe
- Central Asia, Middle East and north Africa
- East and southeast Asia
- High-income Asia Pacific
- High-income western
- Latin America and Caribbean
- Oceania
- South Asia
- Sub-Saharan Africa

- PP >0.99
- 0.975 < PP ≤ 0.99
- 0.95 < PP ≤ 0.975
- 0.75 < PP ≤ 0.95
- PP ≤ 0.75



### Urban-rural difference in 2020 (girls, age 19)

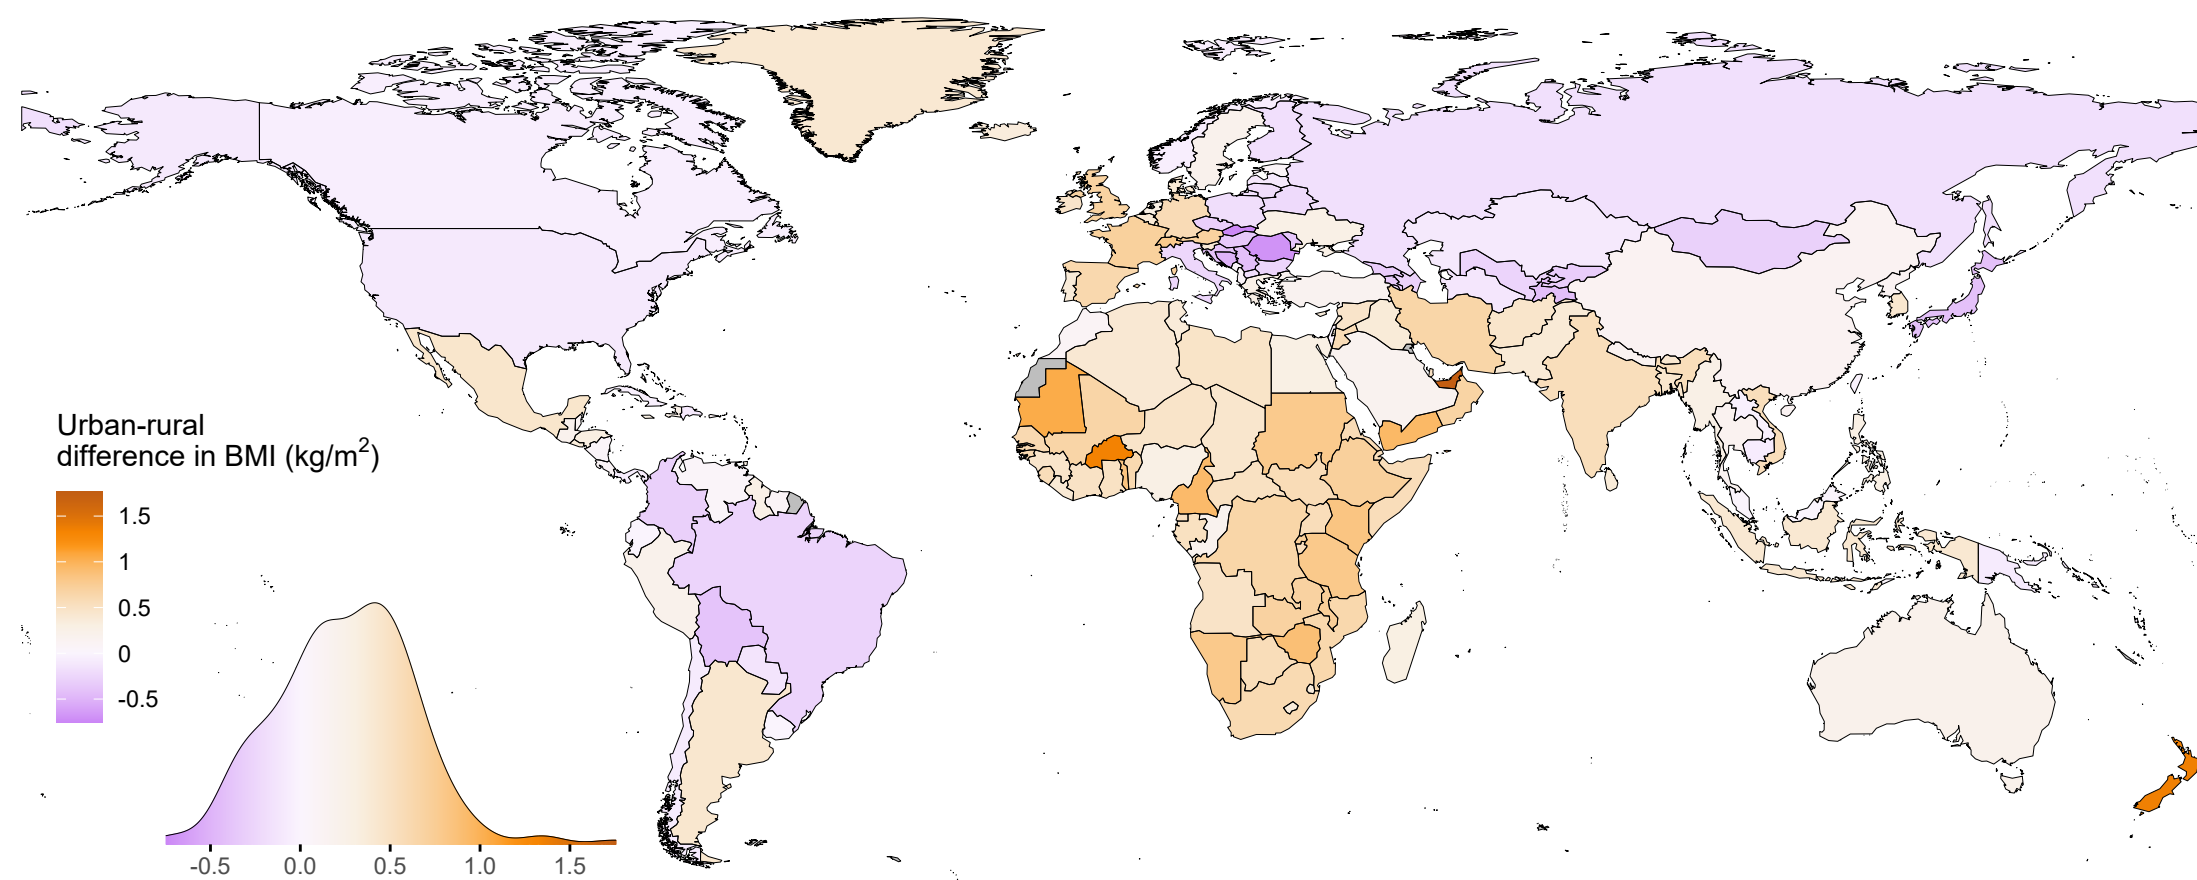

- |                                            |                                                          |                                                |                                          |
|--------------------------------------------|----------------------------------------------------------|------------------------------------------------|------------------------------------------|
| <input type="checkbox"/> American Samoa    | <input type="checkbox"/> Fiji                            | <input type="checkbox"/> Montenegro            | <input type="checkbox"/> Seychelles      |
| <input type="checkbox"/> Bahrain           | <input type="checkbox"/> French Polynesia                | <input type="checkbox"/> Nauru                 | <input type="checkbox"/> Solomon Islands |
| <input type="checkbox"/> Bermuda           | <input type="checkbox"/> Kiribati                        | <input type="checkbox"/> Niue                  | <input type="checkbox"/> Tokelau         |
| <input type="checkbox"/> Brunei Darussalam | <input type="checkbox"/> Maldives                        | <input type="checkbox"/> Palau                 | <input type="checkbox"/> Tonga           |
| <input type="checkbox"/> Cape Verde        | <input type="checkbox"/> Marshall Islands                | <input type="checkbox"/> Samoa                 | <input type="checkbox"/> Tuvalu          |
| <input type="checkbox"/> Comoros           | <input type="checkbox"/> Mauritius                       | <input type="checkbox"/> Sao Tome and Principe | <input type="checkbox"/> Vanuatu         |
| <input type="checkbox"/> Cook Islands      | <input type="checkbox"/> Micronesia, Federated States of |                                                |                                          |

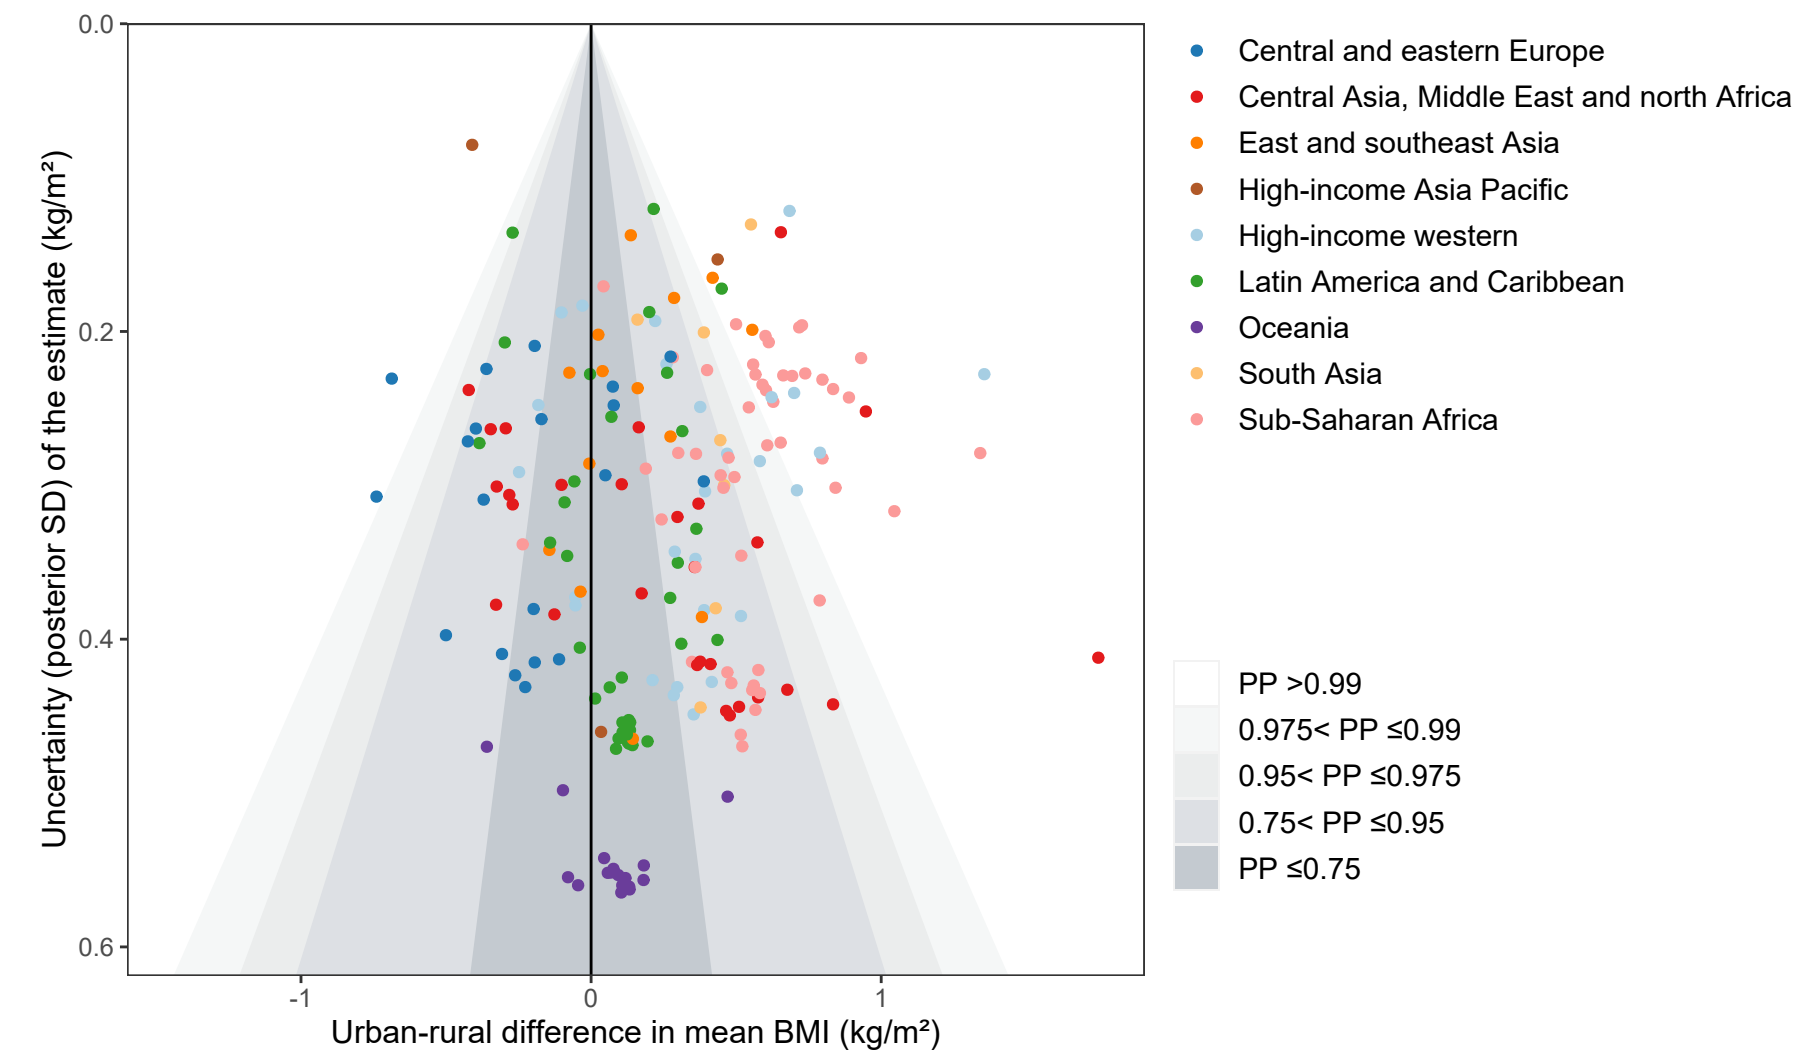

### Change 1990-2020 (girls, age 19)



- |                                            |                                                          |                                                |                                          |
|--------------------------------------------|----------------------------------------------------------|------------------------------------------------|------------------------------------------|
| <input type="checkbox"/> American Samoa    | <input type="checkbox"/> Fiji                            | <input type="checkbox"/> Montenegro            | <input type="checkbox"/> Seychelles      |
| <input type="checkbox"/> Bahrain           | <input type="checkbox"/> French Polynesia                | <input type="checkbox"/> Nauru                 | <input type="checkbox"/> Solomon Islands |
| <input type="checkbox"/> Bermuda           | <input type="checkbox"/> Kiribati                        | <input type="checkbox"/> Niue                  | <input type="checkbox"/> Tokelau         |
| <input type="checkbox"/> Brunei Darussalam | <input type="checkbox"/> Maldives                        | <input type="checkbox"/> Palau                 | <input type="checkbox"/> Tonga           |
| <input type="checkbox"/> Cape Verde        | <input type="checkbox"/> Marshall Islands                | <input type="checkbox"/> Samoa                 | <input type="checkbox"/> Tuvalu          |
| <input type="checkbox"/> Comoros           | <input type="checkbox"/> Mauritius                       | <input type="checkbox"/> Sao Tome and Principe | <input type="checkbox"/> Vanuatu         |
| <input type="checkbox"/> Cook Islands      | <input type="checkbox"/> Micronesia, Federated States of |                                                |                                          |

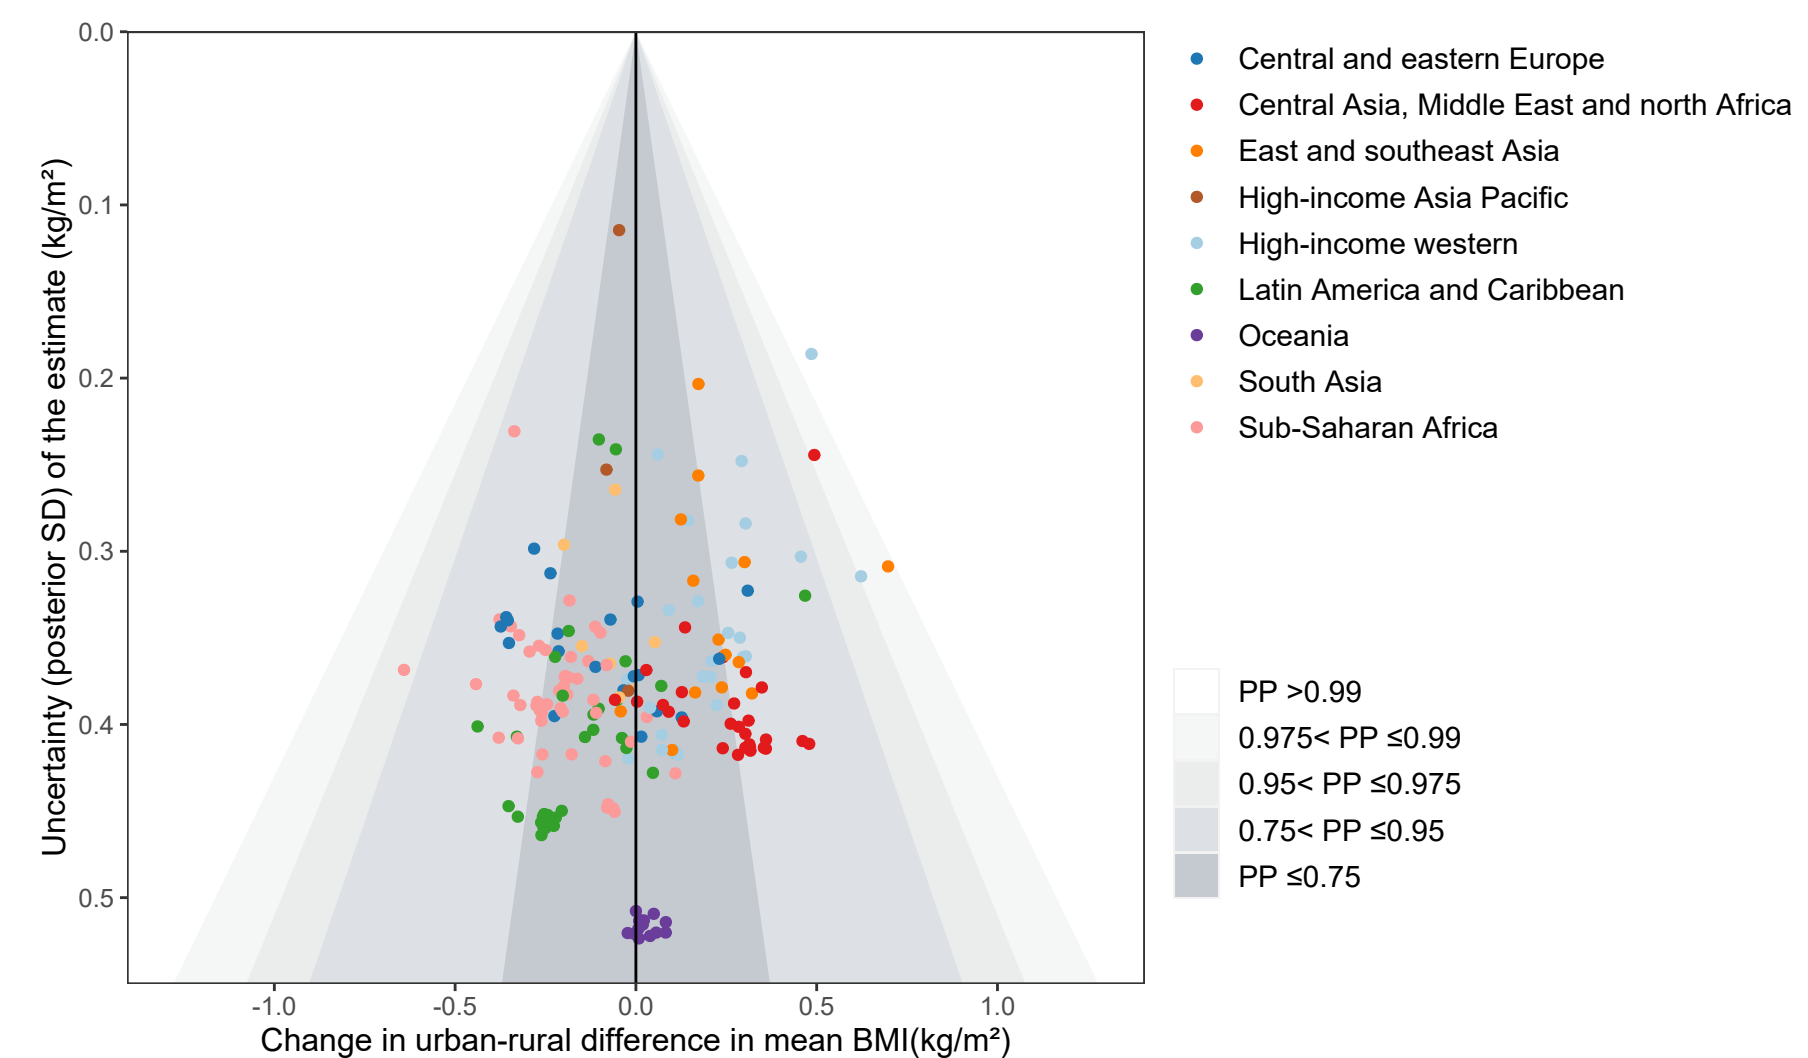

### Urban-rural difference in 2020 (boys, age 19)

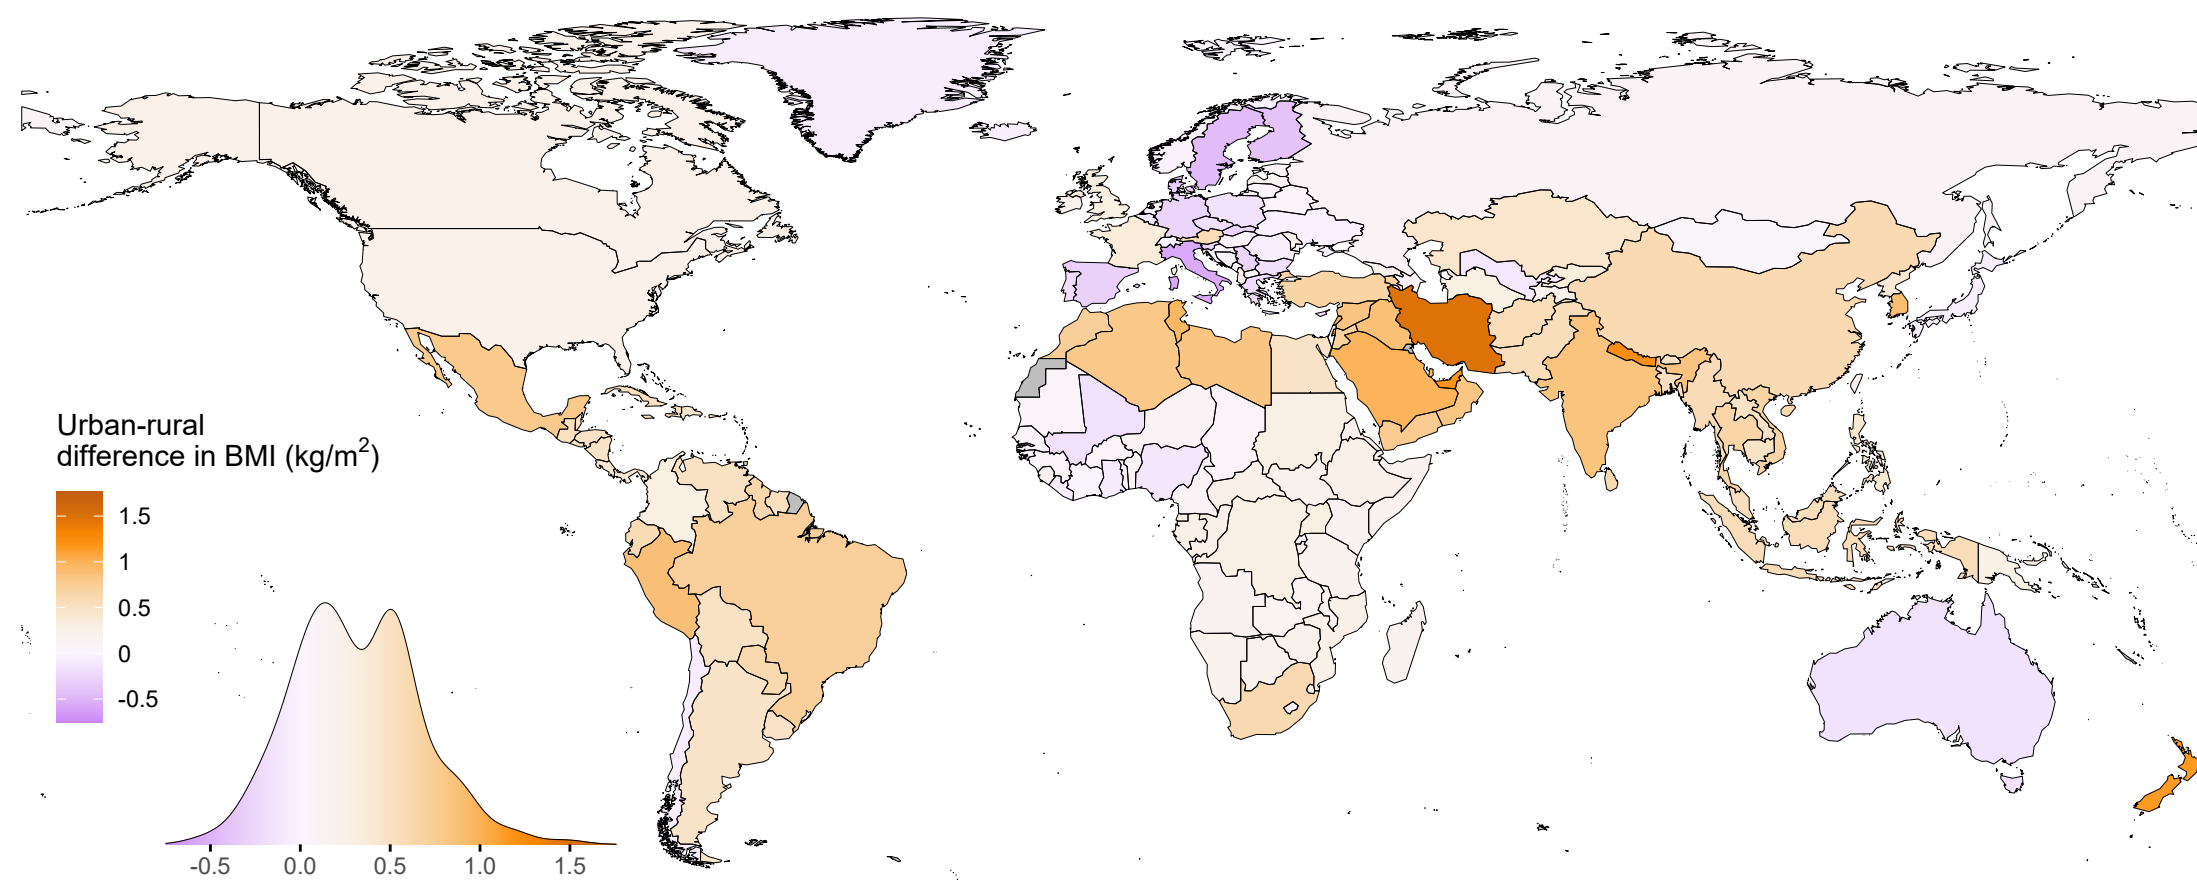

Urban-rural difference in BMI (kg/m<sup>2</sup>)

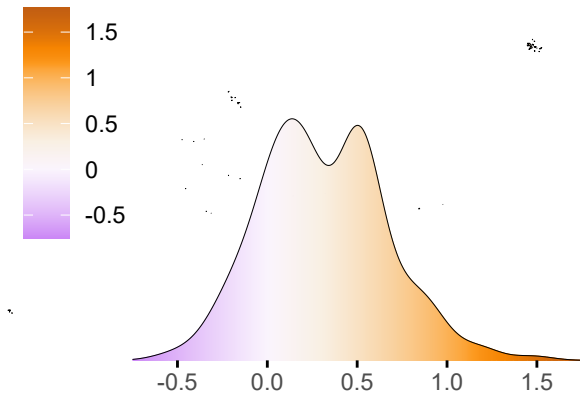

- |                   |                                 |                       |                 |
|-------------------|---------------------------------|-----------------------|-----------------|
| American Samoa    | Fiji                            | Montenegro            | Seychelles      |
| Bahrain           | French Polynesia                | Nauru                 | Solomon Islands |
| Bermuda           | Kiribati                        | Niue                  | Tokelau         |
| Brunei Darussalam | Maldives                        | Palau                 | Tonga           |
| Cape Verde        | Marshall Islands                | Samoa                 | Tuvalu          |
| Comoros           | Mauritius                       | Sao Tome and Principe | Vanuatu         |
| Cook Islands      | Mirconesia, Federated States of |                       |                 |

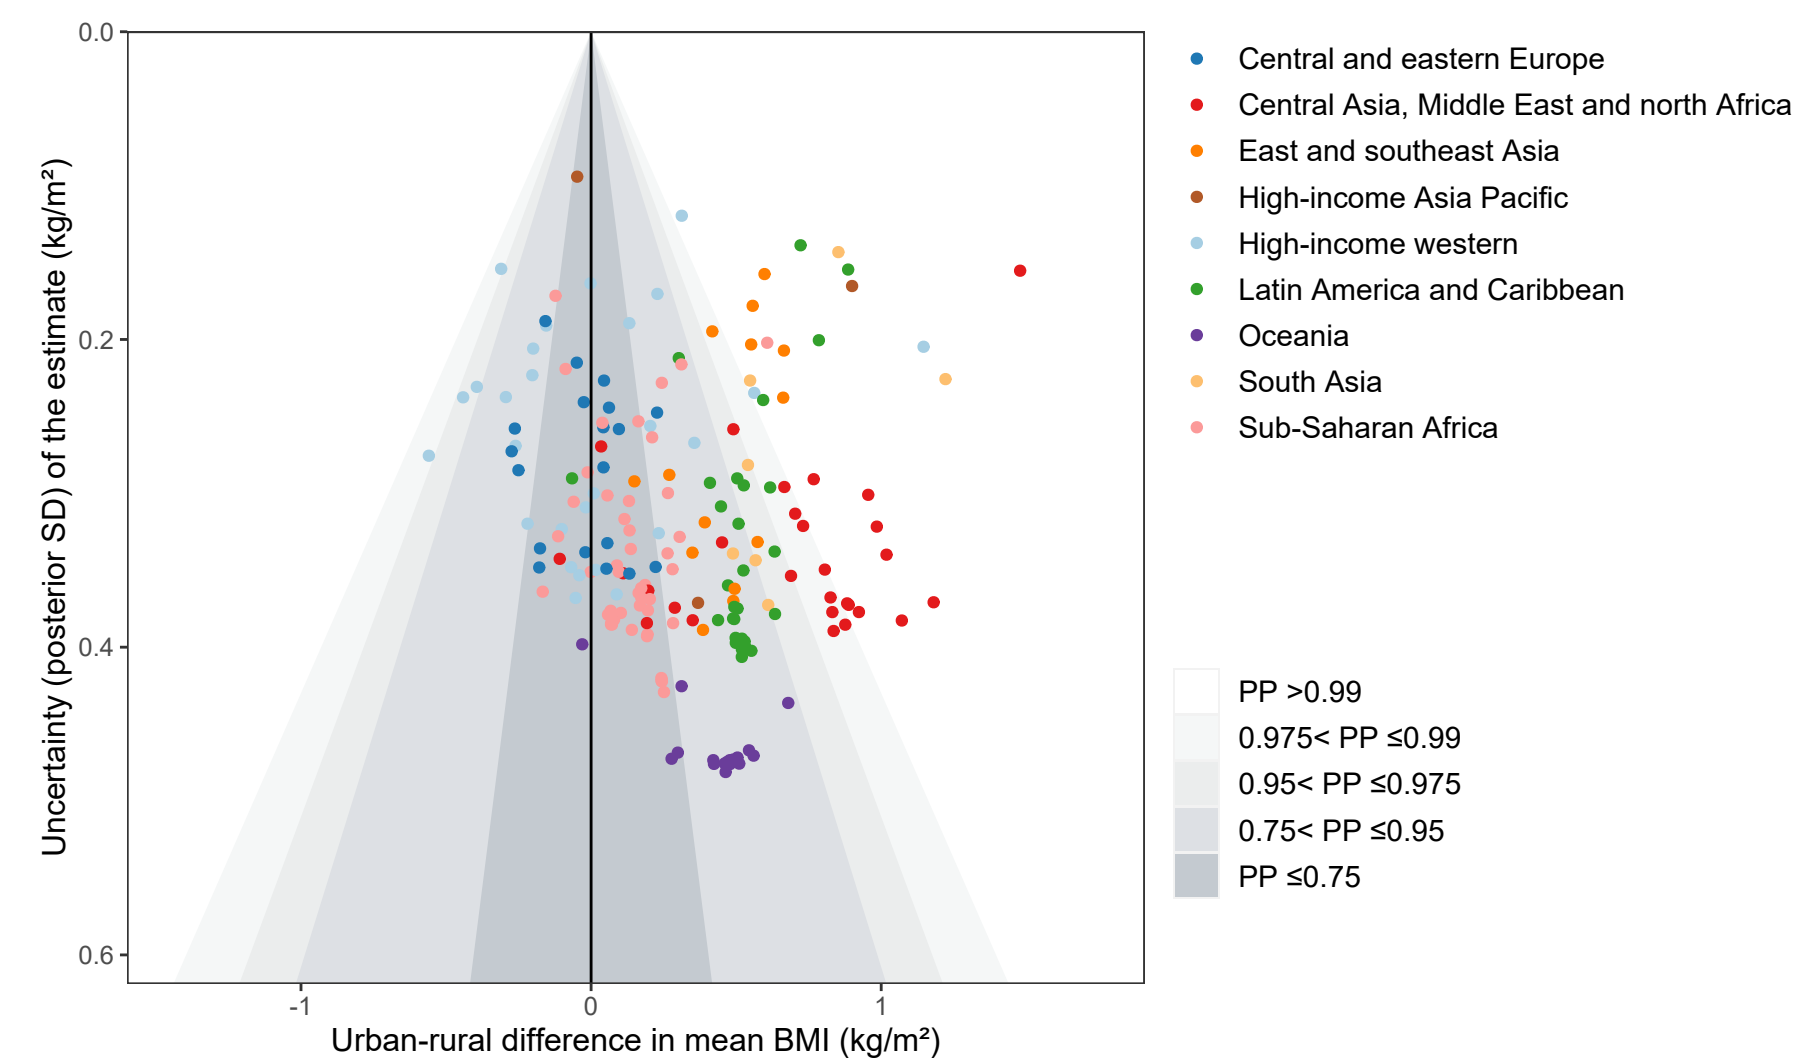

- Central and eastern Europe
- Central Asia, Middle East and north Africa
- East and southeast Asia
- High-income Asia Pacific
- High-income western
- Latin America and Caribbean
- Oceania
- South Asia
- Sub-Saharan Africa

- PP >0.99
- 0.975 < PP ≤ 0.99
- 0.95 < PP ≤ 0.975
- 0.75 < PP ≤ 0.95
- PP ≤ 0.75

### Change 1990-2020 (boys, age 19)

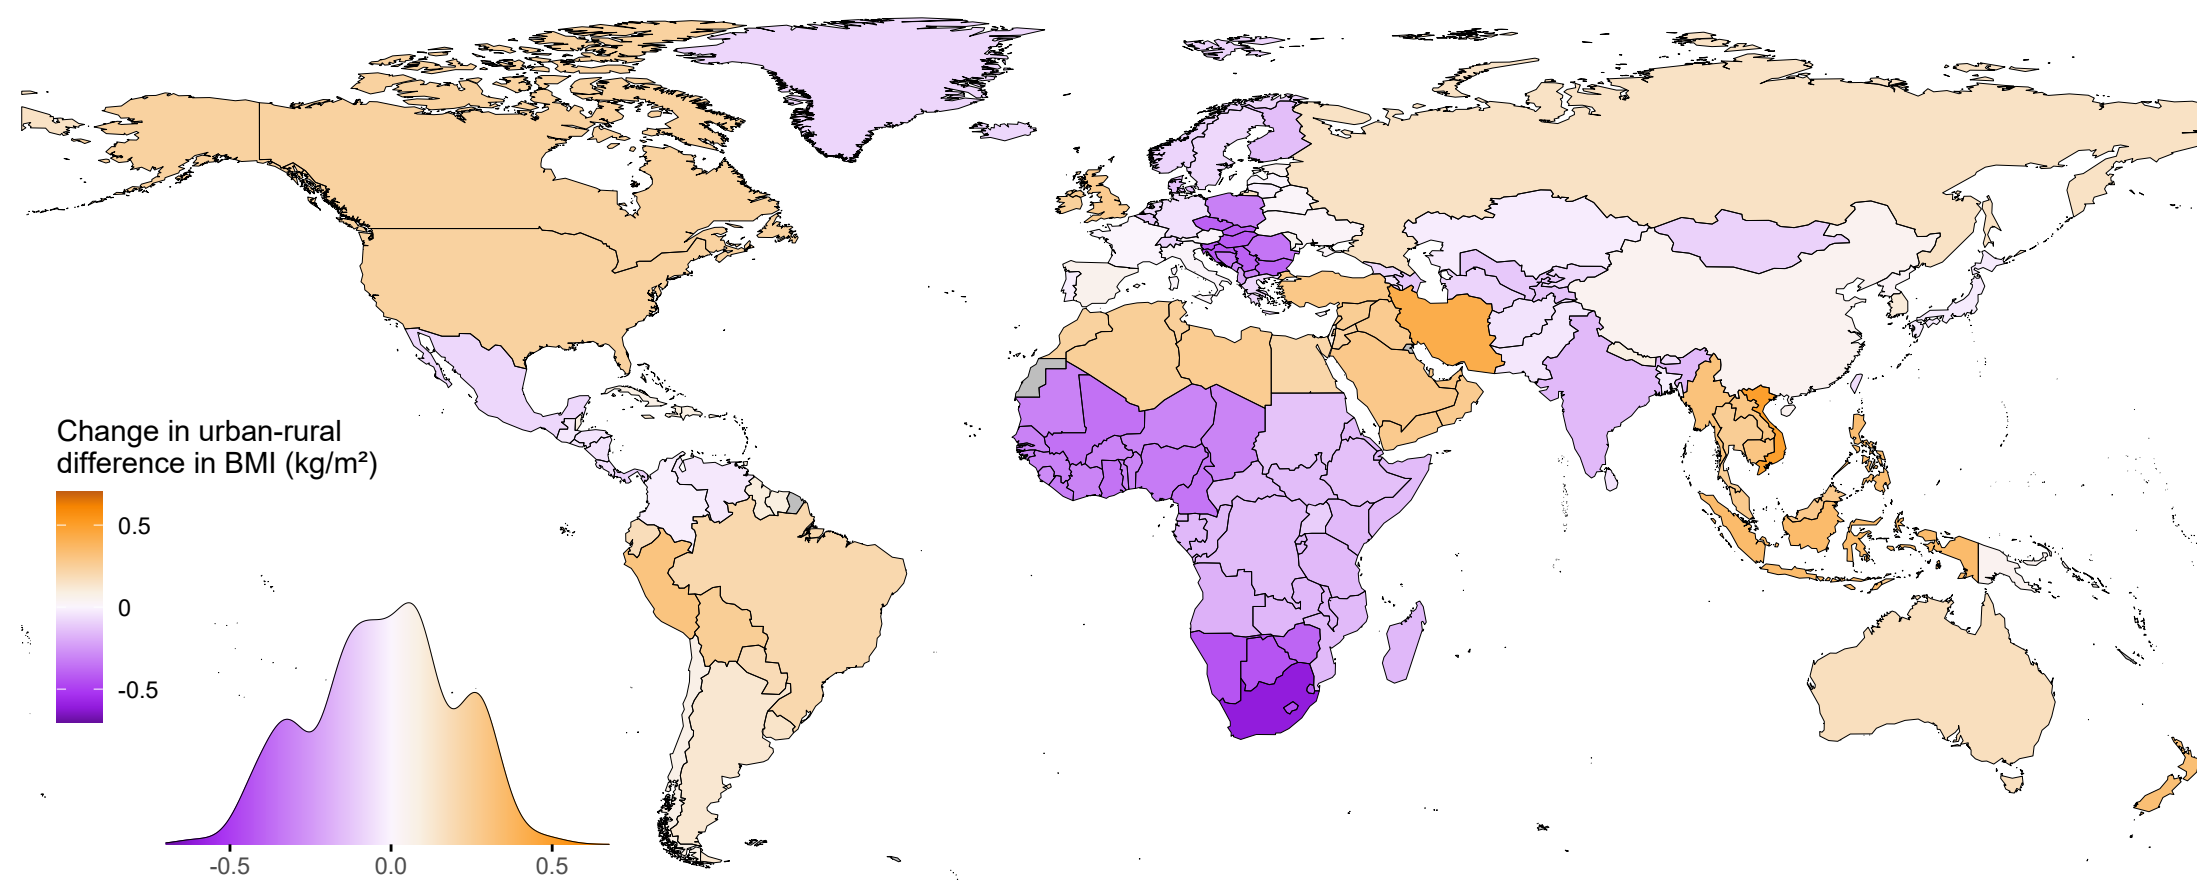

Change in urban-rural difference in BMI (kg/m<sup>2</sup>)

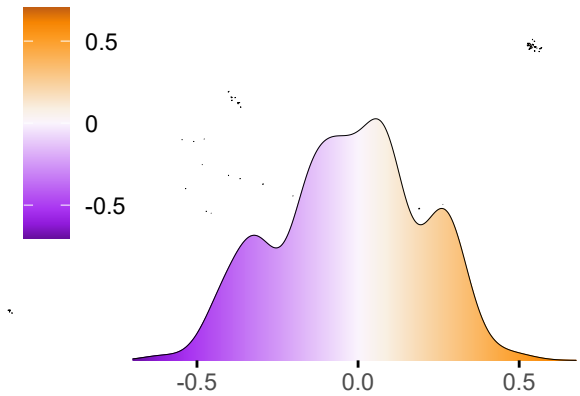

- |                   |                                 |                       |                 |
|-------------------|---------------------------------|-----------------------|-----------------|
| American Samoa    | Fiji                            | Montenegro            | Seychelles      |
| Bahrain           | French Polynesia                | Nauru                 | Solomon Islands |
| Bermuda           | Kiribati                        | Niue                  | Tokelau         |
| Brunei Darussalam | Maldives                        | Palau                 | Tonga           |
| Cape Verde        | Marshall Islands                | Samoa                 | Tuvalu          |
| Comoros           | Mauritius                       | Sao Tome and Principe | Vanuatu         |
| Cook Islands      | Mirconesia, Federated States of |                       |                 |



- Central and eastern Europe
- Central Asia, Middle East and north Africa
- East and southeast Asia
- High-income Asia Pacific
- High-income western
- Latin America and Caribbean
- Oceania
- South Asia
- Sub-Saharan Africa

- PP >0.99
- 0.975 < PP ≤ 0.99
- 0.95 < PP ≤ 0.975
- 0.75 < PP ≤ 0.95
- PP ≤ 0.75

## References

- 1 NCD Risk Factor Collaboration (NCD-RisC). Repositioning of the global epicentre of non-optimal cholesterol. *Nature* 582, 73-77 (2020). <https://doi.org:10.1038/s41586-020-2338-1>
- 2 NCD Risk Factor Collaboration (NCD-RisC). Trends in adult body-mass index in 200 countries from 1975 to 2014: a pooled analysis of 1698 population-based measurement studies with 19.2 million participants. *Lancet* 387, 1377-1396 (2016). [https://doi.org:10.1016/s0140-6736\(16\)30054-x](https://doi.org:10.1016/s0140-6736(16)30054-x)
- 3 NCD Risk Factor Collaboration (NCD-RisC). Rising rural body-mass index is the main driver of the global obesity epidemic in adults. *Nature* 569, 260-264 (2019). <https://doi.org:10.1038/s41586-019-1171-x>
- 4 NCD Risk Factor Collaboration (NCD-RisC). Height and body-mass index trajectories of school-aged children and adolescents from 1985 to 2019 in 200 countries and territories: a pooled analysis of 2181 population-based studies with 65 million participants. *Lancet* 396, 1511-1524 (2020). [https://doi.org:10.1016/s0140-6736\(20\)31859-6](https://doi.org:10.1016/s0140-6736(20)31859-6)
- 5 NCD Risk Factor Collaboration (NCD-RisC). Worldwide trends in hypertension prevalence and progress in treatment and control from 1990 to 2019: a pooled analysis of 1201 population-representative studies with 104 million participants. *Lancet* 398, 957-980 (2021). [https://doi.org:10.1016/s0140-6736\(21\)01330-1](https://doi.org:10.1016/s0140-6736(21)01330-1)
